# Supplementary material for: Discovery of common Asian copy number variants using integrated high-resolution array CGH and massively parallel DNA sequencing
Source: Springer Nature journal article supplement (doi:10.1038/ng.555), 2010-04-04
Supplement: 41588_2010_BFng555_MOESM2_ESM.pdf [file 41588_2010_BFng555_MOESM2_ESM.pdf]

# **Discovery of common Asian copy number variants using integrated high-resolution array CGH and massively parallel DNA sequencing**

Hansoo Park, Jong-Il Kim, Young Seok Ju, Omer Gokcumen, Ryan E. Mills, Sheehyun Kim, Seungbok Lee, Dongwhan Suh, Dongwan Hong, Hyunseok Peter Kang, Yun Joo Yoo, Jong-Yeon Shin, Hyun-Jin Kim, Maryam Yavartanoo, Young Wha Chang, Jung-Sook Ha, Wilson Chong, Ga-Ram Hwang, Katayoon Darvishi, HyeRan Kim, Song Ju Yang, Kap-Seok Yang, Hyungtae Kim, Matthew E. Hurles, Stephen W. Scherer, Nigel P. Carter, Chris Tyler-Smith, Charles Lee & Jeong-Sun Seo

## Supplementary Materials

|                                                                                                      |    |
|------------------------------------------------------------------------------------------------------|----|
| A. Suppl. Table 1: Filtering set training for aCGH with AK1 genome sequence data....                 | 4  |
| B. Suppl. Table 2: Final filter conditions for CNV calling.....                                      | 6  |
| C. Suppl. Table 3: Absolute CNVs of 30 Asians.....                                                   | 7  |
| - <b><i>SuppTable3_Absolute_CNVS_20099.xls</i></b>                                                   |    |
| D. Suppl. Table 4: Summary of statistics for absolute CNVs in the 30 Asians studied...               | 8  |
| E. Suppl. Table 5: List of primers for qPCR and breakpoint sequencing experiments                    |    |
| a. Quantitative PCR.....                                                                             | 9  |
| - <b><i>SuppTable5_qPCR_primers_revision.xls</i></b>                                                 |    |
| b. Breakpoint PCR and sequencing.....                                                                | 10 |
| F. Suppl. Table 6: Summary of qPCR and breakpoint sequencing validation studies.                     |    |
| a. Quantitative PCR.....                                                                             | 11 |
| b. Breakpoint PCR and sequencing.....                                                                | 12 |
| G. Suppl. Table 7: List of 5,177 CNVE identified in the 30 Asians studied.....                       | 13 |
| - <b><i>SuppTable7_5177CNVE_EthnicComparison.xls</i></b>                                             |    |
| H. Suppl. Table 8: List of OMIM genes in identified CNVs.....                                        | 14 |
| - <b><i>SuppTable8_1843_OMIMgene.xls</i></b>                                                         |    |
| I. Suppl. Table 9: List of microRNAs overlapping the personal CNVs identified in the study.....      | 15 |
| - <b><i>SuppTable9_miRNA.xls</i></b>                                                                 |    |
| J. Suppl. Table 10 : List of fusion gene overlapping the personal CNVs identified in this study..... | 16 |
| - <b><i>SuppTable10_fusion_gene_list.xls</i></b>                                                     |    |
| K. Suppl. Table 11 : Modified PANTHER ontology analysis.....                                         | 17 |
| - <b><i>SuppTable11_GeneOntology.xls</i></b>                                                         |    |
| L. Suppl. Table 12 : Examples of genes showing different copy number status between                  |    |

|                                                                                                                                               |    |
|-----------------------------------------------------------------------------------------------------------------------------------------------|----|
| this study and Conrad et al.....                                                                                                              | 18 |
| M. Suppl. Figure 1. Content of repetitive sequence for the Agilent 24M array set and the NimbleGen 42M array set.....                         | 19 |
| N. Suppl. Figure 2. Modified ROC curve for filter training using data for AK1 .....                                                           | 20 |
| O. Suppl. Figure 3. Read-depth information for 721 validated CNVs in AK1 using data for AK1 and NA10851 .....                                 | 21 |
| - <b><i>SuppFig3_ReadDepth.pdf</i></b>                                                                                                        |    |
| P. Suppl. Figure 4. Application of the absolute CNV calling algorithm and confirmation of results using read-depth sequence information.....  | 22 |
| Q. Suppl. Figure 5. Copy number loss is the predominant type of human copy number variation.....                                              | 32 |
| R. Suppl. Figure 6. Definition of CNVs, CNVR, and CNVE.....                                                                                   | 33 |
| S. Suppl. Figure 7. A Comparison between the Agilent 24M array platform and the NimbleGen 42M array platform using genomic DNA from AK1.....  | 34 |
| T. Suppl. Figure 8. Mendelian inconsistency of CNVs in a large Mongolian family using 180k probe aCGH array .....                             | 35 |
| U. Suppl. Figure 9. Comparison of CNV calls made with the Agilent 24M aCGH platform and data from a 105k CNV genotyping platform by GSVC..... | 36 |
| V. Suppl. Figure 10. The hierarchical selection of CNVRs which were included on the 180k probe aCGH array.....                                | 37 |
| W. Suppl. Figure 11. The distribution of probes within the targeted CNVRs in 180k probe aCGH array.....                                       | 38 |
| X. Suppl. Note.....                                                                                                                           | 39 |
| Y. References.....                                                                                                                            | 48 |

**A. Suppl. Table1.** Filtering set training for aCGH with AK1 genome sequence data.

| Filter ID                    | Filtering Condition                            |                                                   |                                                 |                             |                             |                             |                                                |                                                   |                                                 |                             |                             |                             | Optimization Score      |                  |                   |
|------------------------------|------------------------------------------------|---------------------------------------------------|-------------------------------------------------|-----------------------------|-----------------------------|-----------------------------|------------------------------------------------|---------------------------------------------------|-------------------------------------------------|-----------------------------|-----------------------------|-----------------------------|-------------------------|------------------|-------------------|
|                              | CNV < 5000bp                                   |                                                   |                                                 |                             |                             |                             | CNV >= 5000bp                                  |                                                   |                                                 |                             |                             |                             |                         |                  |                   |
|                              | (1)<br>minimum<br>log2 ratio<br>for low<br>CNV | (2)<br>minimum<br>log2 ratio<br>for middle<br>CNV | (3)<br>minimum<br>log2 ratio<br>for high<br>CNV | threshold<br>p-value<br>(1) | threshold<br>p-value<br>(2) | threshold<br>p-value<br>(3) | (4)<br>minimum<br>log2 ratio<br>for low<br>CNV | (5)<br>minimum<br>log2 ratio<br>for middle<br>CNV | (6)<br>minimum<br>log2 ratio<br>for high<br>CNV | threshold<br>p-value<br>(4) | threshold<br>p-value<br>(5) | threshold<br>p-value<br>(6) | relative<br>sensitivity | PPV <sup>a</sup> | sum of the<br>two |
| final<br>optimized<br>filter | 0.35                                           | 0.50                                              | 0.70                                            | 1.00E-21                    | 1.00E-14                    | 1.00E-08                    | 0.3                                            | 0.5                                               | 0.7                                             | 1.00E-21                    | 1.00E-08                    | 1.00E-08                    | 0.845                   | 0.840            | 1.685             |
| filter1                      | 0.2                                            | 0.50                                              | 0.70                                            | 1.00E-21                    | 1.00E-14                    | 1.00E-08                    | 0.3                                            | 0.5                                               | 0.7                                             | 1.00E-21                    | 1.00E-08                    | 1.00E-08                    | 0.860                   | 0.793            | 1.653             |
| filter2                      | 0.25                                           | 0.50                                              | 0.70                                            | 1.00E-21                    | 1.00E-14                    | 1.00E-08                    | 0.3                                            | 0.5                                               | 0.7                                             | 1.00E-21                    | 1.00E-08                    | 1.00E-08                    | 0.857                   | 0.805            | 1.662             |
| filter3                      | 0.3                                            | 0.50                                              | 0.70                                            | 1.00E-21                    | 1.00E-14                    | 1.00E-08                    | 0.3                                            | 0.5                                               | 0.7                                             | 1.00E-21                    | 1.00E-08                    | 1.00E-08                    | 0.852                   | 0.824            | 1.676             |
| filter4                      | 0.4                                            | 0.50                                              | 0.70                                            | 1.00E-21                    | 1.00E-14                    | 1.00E-08                    | 0.3                                            | 0.5                                               | 0.7                                             | 1.00E-21                    | 1.00E-08                    | 1.00E-08                    | 0.832                   | 0.850            | 1.682             |
| filter5                      | 0.45                                           | 0.50                                              | 0.70                                            | 1.00E-21                    | 1.00E-14                    | 1.00E-08                    | 0.3                                            | 0.5                                               | 0.7                                             | 1.00E-21                    | 1.00E-08                    | 1.00E-08                    | 0.825                   | 0.855            | 1.680             |
| filter6                      | 0.5                                            | 0.50                                              | 0.70                                            | 1.00E-21                    | 1.00E-14                    | 1.00E-08                    | 0.3                                            | 0.5                                               | 0.7                                             | 1.00E-21                    | 1.00E-08                    | 1.00E-08                    | 0.820                   | 0.860            | 1.680             |
| filter7                      | 0.35                                           | 0.50                                              | 0.70                                            | 1.00E-19                    | 1.00E-14                    | 1.00E-08                    | 0.3                                            | 0.5                                               | 0.7                                             | 1.00E-21                    | 1.00E-08                    | 1.00E-08                    | 0.845                   | 0.833            | 1.678             |
| filter8                      | 0.35                                           | 0.50                                              | 0.70                                            | 1.00E-17                    | 1.00E-14                    | 1.00E-08                    | 0.3                                            | 0.5                                               | 0.7                                             | 1.00E-21                    | 1.00E-08                    | 1.00E-08                    | 0.849                   | 0.814            | 1.663             |
| filter9                      | 0.35                                           | 0.50                                              | 0.70                                            | 1.00E-15                    | 1.00E-14                    | 1.00E-08                    | 0.3                                            | 0.5                                               | 0.7                                             | 1.00E-21                    | 1.00E-08                    | 1.00E-08                    | 0.849                   | 0.814            | 1.663             |
| filter10                     | 0.35                                           | 0.50                                              | 0.70                                            | 1.00E-23                    | 1.00E-14                    | 1.00E-08                    | 0.3                                            | 0.5                                               | 0.7                                             | 1.00E-21                    | 1.00E-08                    | 1.00E-08                    | 0.838                   | 0.847            | 1.685             |
| filter11                     | 0.35                                           | 0.50                                              | 0.70                                            | 1.00E-25                    | 1.00E-14                    | 1.00E-08                    | 0.3                                            | 0.5                                               | 0.7                                             | 1.00E-21                    | 1.00E-08                    | 1.00E-08                    | 0.835                   | 0.854            | 1.689             |
| filter12                     | 0.35                                           | 0.50                                              | 0.70                                            | 1.00E-27                    | 1.00E-14                    | 1.00E-08                    | 0.3                                            | 0.5                                               | 0.7                                             | 1.00E-21                    | 1.00E-08                    | 1.00E-08                    | 0.829                   | 0.856            | 1.685             |
| filter13                     | 0.35                                           | 0.50                                              | 0.70                                            | 1.00E-21                    | 1.00E-12                    | 1.00E-08                    | 0.3                                            | 0.5                                               | 0.7                                             | 1.00E-21                    | 1.00E-08                    | 1.00E-08                    | 0.854                   | 0.797            | 1.651             |
| filter14                     | 0.35                                           | 0.50                                              | 0.70                                            | 1.00E-21                    | 1.00E-10                    | 1.00E-08                    | 0.3                                            | 0.5                                               | 0.7                                             | 1.00E-21                    | 1.00E-08                    | 1.00E-08                    | 0.872                   | 0.721            | 1.594             |
| filter15                     | 0.35                                           | 0.50                                              | 0.70                                            | 1.00E-21                    | 1.00E-08                    | 1.00E-08                    | 0.3                                            | 0.5                                               | 0.7                                             | 1.00E-21                    | 1.00E-08                    | 1.00E-08                    | 0.920                   | 0.578            | 1.497             |
| filter16                     | 0.35                                           | 0.50                                              | 0.70                                            | 1.00E-21                    | 1.00E-16                    | 1.00E-08                    | 0.3                                            | 0.5                                               | 0.7                                             | 1.00E-21                    | 1.00E-08                    | 1.00E-08                    | 0.820                   | 0.860            | 1.680             |
| filter17                     | 0.35                                           | 0.50                                              | 0.70                                            | 1.00E-21                    | 1.00E-18                    | 1.00E-08                    | 0.3                                            | 0.5                                               | 0.7                                             | 1.00E-21                    | 1.00E-08                    | 1.00E-08                    | 0.811                   | 0.872            | 1.683             |
| filter18                     | 0.35                                           | 0.50                                              | 0.70                                            | 1.00E-21                    | 1.00E-20                    | 1.00E-08                    | 0.3                                            | 0.5                                               | 0.7                                             | 1.00E-21                    | 1.00E-08                    | 1.00E-08                    | 0.804                   | 0.876            | 1.681             |
| filter19                     | 0.35                                           | 0.50                                              | 0.70                                            | 1.00E-21                    | 1.00E-14                    | 1.00E-07                    | 0.3                                            | 0.5                                               | 0.7                                             | 1.00E-21                    | 1.00E-08                    | 1.00E-08                    | 0.852                   | 0.834            | 1.686             |

PPV<sup>a</sup> ,Positive predictive value

**A. Suppl. Table1.** Filtering set training for aCGH with AK1 genome sequence data (*continued*).

| Filter ID                    | Filtering Condition                            |                                                   |                                                 |                             |                             |                             |                                                |                                                   |                                                 |                             |                             |                             | Optimization Score      |       |                   |
|------------------------------|------------------------------------------------|---------------------------------------------------|-------------------------------------------------|-----------------------------|-----------------------------|-----------------------------|------------------------------------------------|---------------------------------------------------|-------------------------------------------------|-----------------------------|-----------------------------|-----------------------------|-------------------------|-------|-------------------|
|                              | CNV < 5000bp                                   |                                                   |                                                 |                             |                             |                             | CNV >= 5000bp                                  |                                                   |                                                 |                             |                             |                             |                         |       |                   |
|                              | (1)<br>minimum<br>log2 ratio<br>for low<br>CNV | (2)<br>minimum<br>log2 ratio<br>for middle<br>CNV | (3)<br>minimum<br>log2 ratio<br>for high<br>CNV | threshold<br>p-value<br>(1) | threshold<br>p-value<br>(2) | threshold<br>p-value<br>(3) | (4)<br>minimum<br>log2 ratio<br>for low<br>CNV | (5)<br>minimum<br>log2 ratio<br>for middle<br>CNV | (6)<br>minimum<br>log2 ratio<br>for high<br>CNV | threshold<br>p-value<br>(4) | threshold<br>p-value<br>(5) | threshold<br>p-value<br>(6) | relative<br>sensitivity | PPV   | sum of the<br>two |
| final<br>optimized<br>filter | 0.35                                           | 0.50                                              | 0.70                                            | 1.00E-21                    | 1.00E-14                    | 1.00E-08                    | 0.3                                            | 0.5                                               | 0.7                                             | 1.00E-21                    | 1.00E-08                    | 1.00E-08                    | 0.845                   | 0.840 | 1.685             |
| filter20                     | 0.35                                           | 0.50                                              | 0.70                                            | 1.00E-21                    | 1.00E-14                    | 1.00E-10                    | 0.3                                            | 0.5                                               | 0.7                                             | 1.00E-21                    | 1.00E-08                    | 1.00E-08                    | 0.840                   | 0.848 | 1.688             |
| filter21                     | 0.35                                           | 0.50                                              | 0.70                                            | 1.00E-21                    | 1.00E-14                    | 1.00E-12                    | 0.3                                            | 0.5                                               | 0.7                                             | 1.00E-21                    | 1.00E-08                    | 1.00E-08                    | 0.836                   | 0.859 | 1.695             |
| filter22                     | 0.35                                           | 0.50                                              | 0.70                                            | 1.00E-21                    | 1.00E-14                    | 1.00E-14                    | 0.3                                            | 0.5                                               | 0.7                                             | 1.00E-21                    | 1.00E-08                    | 1.00E-08                    | 0.829                   | 0.863 | 1.692             |
| filter23                     | 0.35                                           | 0.50                                              | 0.70                                            | 1.00E-21                    | 1.00E-14                    | 1.00E-08                    | 0.2                                            | 0.5                                               | 0.7                                             | 1.00E-21                    | 1.00E-08                    | 1.00E-08                    | 0.857                   | 0.790 | 1.647             |
| filter24                     | 0.35                                           | 0.50                                              | 0.70                                            | 1.00E-21                    | 1.00E-14                    | 1.00E-08                    | 0.25                                           | 0.5                                               | 0.7                                             | 1.00E-21                    | 1.00E-08                    | 1.00E-08                    | 0.852                   | 0.829 | 1.680             |
| filter25                     | 0.35                                           | 0.50                                              | 0.70                                            | 1.00E-21                    | 1.00E-14                    | 1.00E-08                    | 0.35                                           | 0.5                                               | 0.7                                             | 1.00E-21                    | 1.00E-08                    | 1.00E-08                    | 0.840                   | 0.843 | 1.683             |
| filter26                     | 0.35                                           | 0.50                                              | 0.70                                            | 1.00E-21                    | 1.00E-14                    | 1.00E-08                    | 0.4                                            | 0.5                                               | 0.7                                             | 1.00E-21                    | 1.00E-08                    | 1.00E-08                    | 0.831                   | 0.841 | 1.672             |
| filter27                     | 0.35                                           | 0.50                                              | 0.70                                            | 1.00E-21                    | 1.00E-14                    | 1.00E-08                    | 0.45                                           | 0.5                                               | 0.7                                             | 1.00E-21                    | 1.00E-08                    | 1.00E-08                    | 0.820                   | 0.841 | 1.660             |
| filter28                     | 0.35                                           | 0.50                                              | 0.70                                            | 1.00E-21                    | 1.00E-14                    | 1.00E-08                    | 0.5                                            | 0.5                                               | 0.7                                             | 1.00E-21                    | 1.00E-08                    | 1.00E-08                    | 0.802                   | 0.838 | 1.639             |
| filter29                     | 0.35                                           | 0.50                                              | 0.70                                            | 1.00E-21                    | 1.00E-14                    | 1.00E-08                    | 0.3                                            | 0.5                                               | 0.7                                             | 1.00E-19                    | 1.00E-08                    | 1.00E-08                    | 0.847                   | 0.837 | 1.684             |
| filter30                     | 0.35                                           | 0.50                                              | 0.70                                            | 1.00E-21                    | 1.00E-14                    | 1.00E-08                    | 0.3                                            | 0.5                                               | 0.7                                             | 1.00E-17                    | 1.00E-08                    | 1.00E-08                    | 0.850                   | 0.833 | 1.683             |
| filter31                     | 0.35                                           | 0.50                                              | 0.70                                            | 1.00E-21                    | 1.00E-14                    | 1.00E-08                    | 0.3                                            | 0.5                                               | 0.7                                             | 1.00E-15                    | 1.00E-08                    | 1.00E-08                    | 0.850                   | 0.833 | 1.683             |
| filter32                     | 0.35                                           | 0.50                                              | 0.70                                            | 1.00E-21                    | 1.00E-14                    | 1.00E-08                    | 0.3                                            | 0.5                                               | 0.7                                             | 1.00E-23                    | 1.00E-08                    | 1.00E-08                    | 0.840                   | 0.840 | 1.681             |
| filter33                     | 0.35                                           | 0.50                                              | 0.70                                            | 1.00E-21                    | 1.00E-14                    | 1.00E-08                    | 0.3                                            | 0.5                                               | 0.7                                             | 1.00E-25                    | 1.00E-08                    | 1.00E-08                    | 0.839                   | 0.840 | 1.679             |
| filter34                     | 0.35                                           | 0.50                                              | 0.70                                            | 1.00E-21                    | 1.00E-14                    | 1.00E-08                    | 0.3                                            | 0.5                                               | 0.7                                             | 1.00E-27                    | 1.00E-08                    | 1.00E-08                    | 0.838                   | 0.840 | 1.678             |
| filter35                     | 0.35                                           | 0.50                                              | 0.70                                            | 1.00E-21                    | 1.00E-14                    | 1.00E-08                    | 0.3                                            | 0.5                                               | 0.7                                             | 1.00E-21                    | 1.00E-07                    | 1.00E-08                    | 0.846                   | 0.833 | 1.679             |
| filter36                     | 0.35                                           | 0.50                                              | 0.70                                            | 1.00E-21                    | 1.00E-14                    | 1.00E-08                    | 0.3                                            | 0.5                                               | 0.7                                             | 1.00E-21                    | 1.00E-10                    | 1.00E-08                    | 0.843                   | 0.844 | 1.688             |
| filter37                     | 0.35                                           | 0.50                                              | 0.70                                            | 1.00E-21                    | 1.00E-14                    | 1.00E-08                    | 0.3                                            | 0.5                                               | 0.7                                             | 1.00E-21                    | 1.00E-14                    | 1.00E-08                    | 0.842                   | 0.849 | 1.691             |
| filter38                     | 0.35                                           | 0.50                                              | 0.70                                            | 1.00E-21                    | 1.00E-14                    | 1.00E-08                    | 0.3                                            | 0.5                                               | 0.7                                             | 1.00E-21                    | 1.00E-08                    | 1.00E-07                    | 0.846                   | 0.840 | 1.686             |

## B. Suppl. Table 2. Final filter conditions for CNV calling.

### a. Optimized filter conditions of CNV calls for AK1

| Criteria                                                          | Subset                 | p-value | TP <sup>a</sup> | FP <sup>b</sup> | PPV   | relative sensitivity | overall PPV | overall relative sensitivity |
|-------------------------------------------------------------------|------------------------|---------|-----------------|-----------------|-------|----------------------|-------------|------------------------------|
| Length <5000bp,<br>minimum llog2 ratio  ≥0.35                     | 0.5> log2 ratio  ≥0.35 | <=E-21  | 18              | 20              | 0.474 | 0.462                | 0.840       | 0.845                        |
|                                                                   | 0.7> log2 ratio  ≥0.5  | <=E-14  | 83              | 42              | 0.664 | 0.546                |             |                              |
|                                                                   | log2 ratio  ≥0.7       | <=E-8   | 322             | 35              | 0.902 | 0.985                |             |                              |
| Length ≥ 5000bp,<br>minimum llog2 ratio  ≥0.30                    | 0.5> log2 ratio  ≥0.3  | <=E-21  | 31              | 4               | 0.886 | 0.674                |             |                              |
|                                                                   | 0.7> log2 ratio  ≥0.5  | <=E-8   | 61              | 13              | 0.824 | 0.984                |             |                              |
|                                                                   | log2 ratio  ≥0.7       | <=E-8   | 94              | 2               | 0.979 | 0.989                |             |                              |
| TP <sup>a</sup> , True Positive; FP <sup>b</sup> ; False Positive |                        |         |                 |                 |       |                      |             |                              |

### b. Validation of filter conditions of CNV calls for AK2

| Criteria                                      | Subset                 | p-value | TP  | FP | PPV   | overall PPV |
|-----------------------------------------------|------------------------|---------|-----|----|-------|-------------|
| Length <5000bp,<br>minimum llog2 ratio  ≥0.35 | 0.5> log2 ratio  ≥0.35 | <=E-21  | 13  | 4  | 0.765 | 0.855       |
|                                               | 0.7> log2 ratio  ≥0.5  | <=E-14  | 54  | 19 | 0.740 |             |
|                                               | log2 ratio  ≥0.7       | <=E-8   | 326 | 56 | 0.853 |             |
| Length ≥5000bp,<br>minimum llog2 ratio  ≥0.30 | 0.5> log2 ratio  ≥0.3  | <=E-21  | 23  | 7  | 0.767 |             |
|                                               | 0.7> log2 ratio  ≥0.5  | <=E-8   | 42  | 7  | 0.857 |             |
|                                               | log2 ratio  ≥0.7       | <=E-8   | 109 | 3  | 0.973 |             |

### C. Suppl. Table 3. Absolute CNVs of 30 Asians

See SuppTable3\_Absolute\_CNVS\_20099.xls

*Depicted below is a preview for the part of this file.*

| index | sample  | chr | length | start     | stop      | absolute<br>log2ratio | gene_annotation                                 |
|-------|---------|-----|--------|-----------|-----------|-----------------------|-------------------------------------------------|
| 1     | NA18592 | 1   | 42575  | 13065132  | 13107706  | 0.388                 | CDS:LOC440563;promoter:LOC440563;utr:LOC440563  |
| 2     | NA18592 | 1   | 1756   | 14309636  | 14311391  | -0.69                 | intergenic                                      |
| 3     | NA18592 | 1   | 65031  | 17080164  | 17145194  | 0.35                  | CDS:CROCC;promoter:CROCC;utr:CROCC;intron:CROCC |
| 4     | NA18592 | 1   | 763    | 17549141  | 17549903  | -2.25                 | intron:PADI4                                    |
| 5     | NA18592 | 1   | 977    | 23609362  | 23610338  | -1.16                 | intron:TCEA3                                    |
| 6     | NA18592 | 1   | 2594   | 24393400  | 24395993  | -0.81                 | intergenic                                      |
| 7     | NA18592 | 1   | 1776   | 31492567  | 31494342  | -0.87                 | intergenic                                      |
| 8     | NA18592 | 1   | 1949   | 54864767  | 54866715  | -0.82                 | intron:ACOT11                                   |
| 9     | NA18592 | 1   | 3646   | 54864917  | 54868562  | -2.335                | intron:ACOT11                                   |
| 10    | NA18592 | 1   | 901    | 58516499  | 58517399  | -2.953                | intergenic                                      |
| 11    | NA18592 | 1   | 1223   | 58927955  | 58929177  | 0.92                  | CDS:MYSM1;intron:MYSM1                          |
| 12    | NA18592 | 1   | 910    | 59878829  | 59879738  | 0.413                 | CDS:FGGY;intron:FGGY                            |
| 13    | NA18592 | 1   | 1048   | 61855369  | 61856416  | -0.404                | intergenic                                      |
| 14    | NA18592 | 1   | 45875  | 72538815  | 72584689  | -1.141                | intergenic                                      |
| 15    | NA18592 | 1   | 10329  | 75246063  | 75256391  | -0.94                 | intergenic                                      |
| 16    | NA18592 | 1   | 3648   | 86173442  | 86177089  | -0.97                 | intron:COL24A1                                  |
| 17    | NA18592 | 1   | 2841   | 94060915  | 94063755  | -1.987                | intergenic                                      |
| 18    | NA18592 | 1   | 2887   | 95295609  | 95298495  | -0.92                 | intron:ALG14                                    |
| 19    | NA18592 | 1   | 496    | 104244674 | 104245169 | -0.375                | intergenic                                      |
| 20    | NA18592 | 1   | 1072   | 105056655 | 105057726 | -4.04                 | intergenic                                      |
| 21    | NA18592 | 1   | 6574   | 105817666 | 105824239 | -0.94                 | intergenic                                      |

**Supplementary Table 4. Summary of statistics for absolute CNVs in the 30 Asians studied**

| Sample Id | Origin | CN Gain       |             |            |                                                                    | CN Loss       |             |            |                                                                  |
|-----------|--------|---------------|-------------|------------|--------------------------------------------------------------------|---------------|-------------|------------|------------------------------------------------------------------|
|           |        | # of Segments | Length (Mb) | # of genes | Examples of clinically important genes                             | # of Segments | Length (Mb) | # of genes | Examples of clinically important genes                           |
| NA18592   | CHB    | 154           | 4.86        | 101        | CLPS,DBMT1,IRF4,LPA,NBAS                                           | 482           | 5.04        | 227        | ADAMTS14,DAZL,GSTT2,MCTP2,PGA3,4,5                               |
| NA18547   | CHB    | 181           | 5.15        | 134        | IRF4,LPA,PIK3CA,PRKRA,TPPP                                         | 475           | 4.85        | 203        | ADAMTS14,DAZL,MCTP2,PGA3,4,5                                     |
| NA18526   | CHB    | 205           | 4.41        | 181        | IRS2,LPA,PIK3CA                                                    | 472           | 6.03        | 216        | ADAMTS14,DBMT1,LY9,MCTP2,PGA3,4,5,RHD                            |
| NA18570   | CHB    | 172           | 3.69        | 118        | CEL,CLPS,IRF4,LPA,PRKRA                                            | 457           | 4.94        | 214        | ADAMTS14,GHR,GSTT2,LY9,PGA3,4,5                                  |
| NA18566   | CHB    | 124           | 3.64        | 80         | CES1,LPA,MUC20,PIK3CA                                              | 481           | 5.50        | 221        | ADAMTS14,CFH,DAZL,DBMT1,GHR,MGAM,PGA3,4,5,PRSS2                  |
| NA18542   | CHB    | 260           | 8.05        | 291        | ADAMTS14,CLPS,EBF3,FOXC1,HYLS1,IRS2,PRKRA,TPPP                     | 545           | 5.55        | 211        | MGAM,PGA3,4,5                                                    |
| NA18537   | CHB    | 117           | 3.27        | 84         | CES1,CLPS,LPA,PIK3CA,PRKRA                                         | 480           | 4.03        | 204        | ADAMTS14,CFH,DAZL,LY9,MCTP2,PGA3,4,5                             |
| NA18564   | CHB    | 135           | 4.62        | 124        | CES1,NBAS,PRKRA,SKI                                                | 477           | 4.10        | 193        | ADAMTS14,DAZL,DBMT1,GSTT2,LY9,MCTP2,MGAM,NAIP,PGA3,4,5           |
| NA18552   | CHB    | 155           | 4.36        | 101        | CEL,CLPS,DBMT1,IRS2,LPA,NAIP,PIK3CA,PRKRA                          | 455           | 6.12        | 210        | ADAMTS14,CFH,DAZL,MGAM,PGA3,4,5,RHD                              |
| NA18582   | CHB    | 170           | 5.75        | 142        | LPA,NBEA,PRKRA,TPPP                                                | 467           | 4.87        | 220        | ADAMTS14,CFH,DAZL,GHR,MCTP2,MGAM,PGA3,4,5                        |
| NA18947   | JPT    | 165           | 4.25        | 113        | CEL,LPA,MGAM,PIK3CA,TPPP                                           | 488           | 5.58        | 240        | ADAMTS14,CNR2,DAZL,MCTP2,MGAM,NBEA,PGA3,4,5                      |
| NA18972   | JPT    | 277           | 5.12        | 272        | IRX1,LPA,MUC20,MUC4,NAIP,PRKRA,TPPP                                | 473           | 5.69        | 223        | ADAMTS14,CNR2,DAZL,MCTP2,PGA3,4,5                                |
| NA18942   | JPT    | 114           | 3.99        | 83         | CES1,IRF4,LPA,NBEA,PIK3CA,PRKRA                                    | 598           | 10.36       | 424        | ADAMTS14,CFH,DAZL,DBMT1,EBF3,IRS2,MCTP2,MUC20,MUC4,PGA3,4,5,TPPP |
| NA18949   | JPT    | 176           | 5.16        | 145        | CES1,EBF3,FOXC1,LPA,PRKRA,SKI                                      | 464           | 5.68        | 218        | ADAMTS14,DAZL,MGAM,PGA3,4,5                                      |
| NA18951   | JPT    | 139           | 3.65        | 83         | IRF4,KRT34,NBAS,PRKRA,SKI                                          | 450           | 4.09        | 170        | ADAMTS14,CNR2,DAZL,DBMT1,LY9,MGAM,PGA3,4,5                       |
| NA18973   | JPT    | 278           | 14.60       | 387        | ADAMTS14,CEL,CES1,EBF3,HYLS1,IRS2,LPA,PITX1,TPPP                   | 504           | 6.93        | 200        | DAZL,MGAM,PGA3,4,5                                               |
| NA18969   | JPT    | 345           | 13.70       | 466        | ADAMTS14,EBF3,HYLS1,NBAS,SKI                                       | 553           | 9.54        | 226        | ADAMTS14,DAZL,LY9,MCTP2,MGAM,PGA3,4,5                            |
| NA18968   | JPT    | 216           | 12.80       | 343        | CES1,CLPS,DBMT1,EBF3,HYLS1,IRF4,IRS2,IRX1,NBEA,PIK3CA,PITX1        | 454           | 4.08        | 168        | DAZL,NAIP,PGA3,4,5                                               |
| NA18997   | JPT    | 201           | 5.10        | 197        | CCL4,MCTP2,MUC20,MUC4,PRKRA                                        | 542           | 4.37        | 223        | ADAMTS14,CFH,DAZL,MGAM                                           |
| NA18999   | JPT    | 170           | 4.25        | 119        | CCL4,CES1,FOXC1,LPA,PRKRA                                          | 504           | 4.47        | 207        | ADAMTS14,DAZL,MCTP2,MGAM,PGA3,4,5,PIK3CA                         |
| AK2       | KRS    | 134           | 3.66        | 94         | DBMT1,LPA,NAIP                                                     | 480           | 6.16        | 230        | ADAMTS14,CNR2,DAZL,MCTP2,PGA3,4,5                                |
| AK4       | KRS    | 252           | 4.28        | 120        | IRF4,KRT34,LPA,MGAM,PRKRA                                          | 460           | 5.64        | 225        | ADAMTS14,CEL,DAZL,MCTP2,PGA3,4,5,PRKRA                           |
| AK6       | KRS    | 245           | 6.83        | 273        | CEL,CLPS,EBF3,FOXC1,IRS2,IRX1,LPA,NBAS,PIK3CA,PITX1,PRKRA,SKI,TPPP | 469           | 5.00        | 200        | ADAMTS14,CNR2,DAZL,DBMT1,PGA3,4,5                                |
| AK8       | KRS    | 154           | 4.55        | 98         | CCL4,IRF4,LPA,NBAS,PRKRA,TPPP                                      | 469           | 5.63        | 212        | ADAMTS14,DAZL,DBMT1,PGA3,4,5,PRSS2                               |
| AK10      | KRS    | 194           | 6.22        | 204        | DBMT1,FOXC1,IRF4,IRS2,IRX1,LPA,PITX1                               | 455           | 5.39        | 199        | ADAMTS14,DAZL,MCTP2,MUC20,PGA3,4,5                               |
| AK12      | KRS    | 139           | 4.22        | 98         | CEL,CLPS,EBF3,FOXC1,IRS2,IRX1,LPA,SKI,TPPP                         | 457           | 5.99        | 206        | ADAMTS14,DAZL,MCTP2,MUC20,PGA3,4,5                               |
| AK14      | KRS    | 176           | 4.58        | 151        | CCL4,CES1,CLPS,DBMT1,LPA,MUC20,MUC4,PRKRA,RHD,TPPP                 | 454           | 5.08        | 204        | ADAMTS14,DAZL,GHR,GSTT2,MCTP2,MGAM,PGA3,4,5                      |
| AK16      | KRS    | 129           | 3.04        | 92         | IRF4,KRT34,LPA,MUC20,MUC4,PITX1,PRKRA,TPPP                         | 461           | 6.07        | 219        | ADAMTS14,DAZL,RHD                                                |
| AK18      | KRS    | 161           | 5.30        | 108        | CES1,CLPS,EBF3,LPA,PRKRA,RHD                                       | 467           | 5.82        | 217        | ADAMTS14,DAZL,DBMT1,GHR,MCTP2,PGA3,4,5,PIK3CA                    |
| AK20      | KRS    | 164           | 3.39        | 97         | IRF4,LPA,PIK3CA,PRKRA                                              | 604           | 10.22       | 433        | ADAMTS14,DAZL,DBMT1,PGA3,4,5,PRSS2                               |

**ADAMTS14**, ADAM metalloproteinase with thrombospondin type 1 motif, 1; **CCL4**, chemokine (C-C motif) ligand 3; **CEL**, carboxyl ester lipase (bile salt-stimulated lipase); **CES1**, carboxylesterase 1 (monocyte/macrophage serine esterase 1); **CFH**, complement factor H; **CLPS**, colipase, pancreatic; **CNR2**, cannabinoid receptor 2 (macrophage) =CB2; **DAZL**, deleted in azospermia-like; **DBMT1**, deleted in malignant brain tumors 1; **EBF3**, early B-cell factor 3; **FOXC1**, forkhead box C1; **GMD5** GDP-mannose 4,6-dehydratase; **GHR**, growth hormone receptor; **GSTT2**, DDT D-dopachrome tautomerase; glutathione S-transferase theta 2; **HYLS1**, hydroletharus syndrome 1; **IRF4**, interferon regulatory factor 4; **IRS2**, insulin receptor substrate 2; **IRX1**, iroquois homeobox 1; **KRT34**, keratin 34; **LPA**, lipoprotein, Lp(a); **LY9**, lymphocyte antigen 9; **MCTP2**, multiple C2 domains, transmembrane 2; **MGAM**, maltase-glucoamylase (alpha-glucosidase); **MUC4**, mucin 4; **MUC20**, mucin 20, cell surface associated; **NAIP**, NLR family, apoptosis inhibitory protein; **NBAS**, neuroblastoma amplified sequence; **NBEA**, neurobeachin; **PGA3,PGA4,PGA5**, pepsinogen 3,4,5; **PIK3CA**, PIK3CA phosphoinositide-3-kinase, catalytic, alpha polypeptide; **PITX1**, paired-like homeodomain 1; **PRKRA**, protein kinase, interferon-inducible double stranded RNA dependent activator; **PRSS2**, protease, serine, 2 (trypsin 2); **RHD**, RhD; **SKI**, v-ski sarcoma viral oncogene homolog (avian); **TPPP**, tubulin polymerization promoting protein

# **E. Suppl. Table 5.** List of primers for qPCR and breakpoint sequencing experiments

## (a) Quantitative PCR

See SuppTable5\_qPCR\_primers\_revision.xls

*Depicted below is a preview for the part of this file.*

| Index | Forward Primer           | Reverse Primer           | Length<br>PCR_product(bp) | Chr | Product_Start | Product_Stop |
|-------|--------------------------|--------------------------|---------------------------|-----|---------------|--------------|
| 1     | AGAGGCCAAGGCTAGGTTCTTATT | AACATGCTTCATCATCAGAGTGAG | 78                        | 1   | 62,428,839    | 62,428,916   |
| 2     | TGACTCCTAAGACAAGGCTGTATG | CTCCTTGGCTGTAGTAAAATCTCC | 78                        | 1   | 108,536,366   | 108,536,443  |
| 3     | CTCCCTATTTACTTGACTGCCTGT | TGTGGTGGAAGGTAGAGTTCAATA | 89                        | 1   | 150,842,083   | 150,842,171  |
| 4     | CTGAGTAGTTCCTCCTTTGGTGTT | CTGACACTGATTTCTTCATTCCAG | 71                        | 2   | 33,080,098    | 33,080,168   |
| 5     | GAGAAATGTGTTTCTACTGGGACT | CTATCGGCTCCTGAGGAATATTTA | 92                        | 2   | 89,028,624    | 89,028,715   |
| 6     | TAGTAAGATTCAGAGCCTGACCTG | AAGCTGTGACGATATTGTAGCTG  | 71                        | 2   | 89,288,976    | 89,289,046   |
| 7     | TGTTTTCCCTAGCAGACCTTATC  | TGTCCTATGTGTGGAGTGTTCTTT | 98                        | 2   | 89,644,666    | 89,644,763   |
| 8     | CCTGTCACCTCTTCTGATTACCTT | CCCTTTGGTATACCTGTTTATTGC | 100                       | 2   | 99,470,685    | 99,470,784   |
| 9     | TCCTACACACTGTTTTCATCACCT | GTAATGGAGGGCTTTGAAAGTCTA | 103                       | 2   | 176,978,395   | 176,978,497  |
| 10    | GAAGTTCAGAGTTCAGCTTCTTGG | GGCATCAACACTCTTTGATATGTG | 75                        | 3   | 32,079,870    | 32,079,944   |
| 11    | AAGACCAAGCAAAGTAAGAAGTGG | TCGTTGTATCTAAGAGGTGGGATT | 75                        | 3   | 196,946,815   | 196,946,889  |
| 12    | GATGTGCTACTTAGACTCCACGAA | CTGGTAGCATCCTGAGAATAATGA | 144                       | 4   | 6,734,301     | 6,734,444    |
| 13    | CCTATAATGGCATGTGACAAAGAG | TTACCAGAAATGGTGCTACATGAC | 125                       | 4   | 70,237,125    | 70,237,249   |
| 14    | CAAGTGAGAAATTTCTGGCAGTG  | GTTGATCTAACTGGCAACCACA   | 102                       | 4   | 165,424,175   | 165,424,276  |
| 15    | GGGAGGAAGAATAGAGAGAGGAAC | ATAAGTCTAGACACAGGGGTGAGG | 129                       | 5   | 60,038,322    | 60,038,450   |
| 16    | GAAGTGAAACAACAGTACCCTGTG | ATATTAAGAGTCCCAGACAGTGG  | 136                       | 5   | 170,063,220   | 170,063,355  |
| 17    | GGAAACAGAGTAGCACTCTAGGC  | TTGACACGACTAGTAACCAAGGAA | 78                        | 6   | 281,744       | 281,821      |
| 18    | GGGGTAACATAGGGTTATAAAGCA | CAGTAATCAACTGTCTTCCAGAG  | 112                       | 8   | 39,499,757    | 39,499,868   |
| 19    | AGGTGAGACCAGTTCCTTGTATC  | GTCTCTTGGCTTTAGACCAGTTGT | 116                       | 9   | 112,068,988   | 112,069,103  |
| 20    | CAGAGTAGGGAGTCGGTTGTCTAT | GAGGTTGAGCTTCATCACAGTAGA | 133                       | 10  | 124,338,181   | 124,338,313  |
| 21    | AAATAGATAAGCCACTCCTCCAC  | CCCCAATATCTCAACACACAGTAG | 127                       | 11  | 11,780,381    | 11,780,507   |

## E. Suppl. Table 5. List of primers for qPCR and breakpoint sequencing experiments

### (b) Breakpoint PCR and sequencing

| Index | Forward primer           | Reverse primer           |
|-------|--------------------------|--------------------------|
| 1     | TCACCAGCTCCTAAAATCCAAT   | CTTTTCACACAGTTGCTTGGAG   |
| 2     | TCCTTTCAATCACTTTGAGCTG   | TCTCTTGATCCTCTTGCTCCTC   |
| 3     | CTCCTCTCCTAACCCTGGAAGT   | TGGAATAAGGTCCCAATAGGAG   |
| 4     | GAGACAGCACAAAACAACAAGC   | AGCTTGCTGCCTTTAGTCAAAC   |
| 5     | CTGGAAGCAATTAAGCCACTCT   | TGCCTCTATAAGTTTGTGTGACG  |
| 6     | AAAGAGTGGTTTTAGCCTTTC    | TCCTTTTAAGCGCTAGGTCAG    |
| 7     | AACCTTTTGGTGGCTATTGAGA   | TAGCAAGGATTCAAGACCCTGT   |
| 8     | ACATGCCTTCCAGGCTATAGTG   | ACCAATGTTGAAATGTCACAGG   |
| 9     | TTTACCTTGAGGCCACTGAAAT   | TTCTGACTCAGCATTTCTGCAT   |
| 10    | GCTGATGACTGTCCCTTTATCC   | CAGTTTCACCATTCTTACAGCAG  |
| 11    | GTCAGCACCAATCTTCTTAGAAAC | GAATGCCAATGTAAACAGAATGG  |
| 12    | CAGTCACCAACCAGATGAAAGA   | TCAGAGAAAAGCATGACTCAGGA  |
| 13    | GTTGACTTGAGACCATTGTGGA   | AACAGTGTCCAGTGACATGTCTTA |
| 14    | TAGTGTTCATGGGAGGAAG      | GTCCAGCAGATTCACATAATGG   |
| 15    | CCTGCTAGTGCTTCTCTCTCC    | CATCTTCCTTCCTCCTCTTTT    |
| 16    | GTTGGACAAGGCTACACACAAA   | TCACTCTCACTCTCCAGATCA    |
| 17    | TAGTGGAATTTGGTCCCTGACT   | AAAAGAAGGTTGTATGGCAGGA   |
| 18    | ACAGGCTATTTGGAATTCAAGC   | GGGTCATAGTAGGCAGCTCAGT   |
| 19    | GAATTCATCCTCCATGTTCCAT   | ATCCTGTTGGCATATTTTGCTC   |
| 20    | CGTGTGAATGACATCAGCCTAT   | ATGCTGGACTGCAGAGTAAACA   |
| 21    | TGAGCAGCAGTGATTGCTTAAT   | TCAGGGAGTTGTAATGCAAAGA   |
| 22    | GTCTCCTGACAGTGCCATACAA   | AGAAGCAAACGTTGAAAAGAGG   |
| 23    | AAACCCACTCCTCCTCTTCTC    | ACTCAGGGTCAAGCAATTAGGA   |
| 24    | TTATATCCCAGAGAGCTTTGC    | GATGTGGCTTTTCCTGAGTAGG   |
| 25    | GACCCCTGTAATTTTGAGAGA    | CTGAGCTCTGCCTCAATCAGTA   |
| 26    | GCATGGTAGGATTTGGACTCTC   | ATGGAACCTATTCCTTGTGCT    |
| 27    | GCTATGAACCCGTACCTTTTG    | GGGAAATATACAAGGCAAAGGA   |
| 28    | AGACAAAAAGAGGTGCCAAAG    | AACTTGCGAAGTTACCAAAGGA   |
| 29    | AGCCACCATCTCATAATTCACA   | CCTAAACCTCTCATCCATCAGG   |
| 30    | AAATTTAGAGGTCACCCCTTT    | GGAGCTTGGTGCCTATCTCAC    |
| 31    | CCTCATCTCTCTGGTCTGAAGG   | ACCCTCAGCATTTTATCCTCA    |
| 32    | GTTTGGCAGCTTCAGAAAACT    | CTGGGCCTAGTTAAAAAGTAAAGG |
| 33    | AAATTAGATCAATGCCCTGCAC   | GTGGTCAAATCTTCCTGGACTC   |
| 34    | TTGGTACAACGTGAGGTGAGAC   | TGATTGTCTGGCTGAAAACAAG   |
| 35    | TGCCTCTTTCAAACCAGAGATT   | TTGAAAGAATATGTCCCTGGTC   |
| 36    | ACTGTGAGGAAGCTCACAATCC   | TTGGCCACTATTCCTTTCTTA    |
| 37    | TTCATCACTCCCTCTAACAGCA   | ATCTGGGCCATCGTATAAGAGA   |
| 38    | ACCTCAGACTTGGGTGTTCAAGT  | GGTGATTCCCTGCTCAAATACA   |
| 39    | GGACAAAAAGGAACAGGTTCTG   | CCAACCTTCTTTCCTTCATCAC   |
| 40    | CAGGATCTGGACCTGTCCTTAC   | TCCATTCCAGTACAAGAAGCAC   |
| 41    | AGAGGTACTTGATTGCCTCTGG   | GGACTTCTGAGGCTTGAAGAAA   |
| 42    | CAAGCATGACTGGTAAATTTGG   | AAAAGCCACATAGTGCTACCAAG  |

**F. Suppl. Table 6. Summary of qPCR and breakpoint sequencing validation studies**

(a) Quantitative PCR

|      |           | Agilent 24M aCGH |           |         |         |
|------|-----------|------------------|-----------|---------|---------|
|      |           | CN gain          | CN normal | CN loss | Overall |
| qPCR | CN gain   | 594              | 61        | 27      | 682     |
|      | CN normal | 19               | 593       | 17      | 629     |
|      | CN loss   | 15               | 25        | 530     | 570     |
|      | Overall   | 628              | 679       | 574     | 1881    |

|                   |        |
|-------------------|--------|
| Correct call      | 1717   |
| Incorrect call    | 164    |
| Correct call rate | 91.28% |

**F. Suppl. Table 6. Summary of qPCR and breakpoint sequencing validation studies (b) Breakpoints sequencing**

| Index | Sample  | Chr | True Start  | True End    | Size (bp) | Start Difference (bp) | End Difference (bp) |
|-------|---------|-----|-------------|-------------|-----------|-----------------------|---------------------|
| 1     | AK6     | 1   | 84,484,593  | 84,488,463  | 3,871     | 126                   | 15                  |
| 2     | AK14    | 1   | 105,056,556 | 105,057,713 | 1,158     | 99                    | 13                  |
| 3     | NA18564 | 2   | 51,827,327  | 51,827,745  | 419       | -38                   | 46                  |
| 4     | AK10    | 2   | 108,221,850 | 108,222,714 | 865       | -108                  | -72                 |
| 5     | AK8     | 3   | 26,425,973  | 26,427,303  | 1,331     | -30                   | -64                 |
| 6     | NA18968 | 3   | 78,862,108  | 78,862,409  | 302       | -112                  | 74                  |
| 7     | AK18    | 3   | 133,190,943 | 133,196,075 | 5,133     | 119                   | -108                |
| 8     | NA18542 | 3   | 153,247,620 | 153,248,061 | 442       | -170                  | -86                 |
| 9     | NA18968 | 3   | 167,470,179 | 167,470,516 | 338       | -71                   | 154                 |
| 10    | AK12    | 3   | 191,220,038 | 191,223,219 | 3,182     | 116                   | 11                  |
| 11    | AK18    | 4   | 30,623,047  | 30,624,073  | 1,027     | -29                   | 68                  |
| 12    | NA18949 | 4   | 43,446,564  | 43,446,887  | 324       | -133                  | -18                 |
| 13    | NA18942 | 4   | 165,422,493 | 165,425,670 | 3,178     | -24                   | 6                   |
| 14    | NA18997 | 5   | 97,427,318  | 97,428,518  | 1,201     | -22                   | -80                 |
| 15    | AK6     | 5   | 127,363,899 | 127,364,827 | 929       | -33                   | -33                 |
| 16    | AK6     | 5   | 162,794,351 | 162,795,870 | 1,520     | 9                     | 27                  |
| 17    | NA18542 | 5   | 170,062,496 | 170,063,968 | 1,473     | -52                   | -33                 |
| 18    | AK6     | 6   | 22,158,817  | 22,162,220  | 3,404     | 135                   | 112                 |
| 19    | NA18526 | 7   | 131,923,553 | 131,924,090 | 538       | -23                   | -65                 |
| 20    | NA18552 | 8   | 62,197,914  | 62,198,447  | 534       | -24                   | 20                  |
| 21    | AK14    | 10  | 20,036,712  | 20,038,183  | 1,472     | 53                    | -13                 |
| 22    | AK6     | 10  | 66,976,938  | 66,985,301  | 8,364     | -57                   | -73                 |
| 23    | AK10    | 10  | 107,940,672 | 107,941,586 | 915       | 289                   | -80                 |
| 24    | NA18537 | 10  | 130,726,861 | 130,727,265 | 405       | -76                   | -31                 |
| 25    | AK4     | 12  | 49,259,982  | 49,261,778  | 1,797     | 271                   | -11                 |
| 26    | AK18    | 13  | 38,832,183  | 38,833,482  | 1,300     | 206                   | 51                  |
| 27    | NA18942 | 13  | 108,159,746 | 108,160,439 | 694       | 78                    | -152                |
| 28    | AK10    | 14  | 21,951,506  | 21,952,100  | 595       | 99                    | 48                  |
| 29    | NA18542 | 14  | 38,074,269  | 38,074,779  | 511       | -11                   | -13                 |
| 30    | AK18    | 14  | 81,568,863  | 81,573,084  | 4,222     | -25                   | 136                 |
| 31    | NA18973 | 14  | 84,366,861  | 84,371,909  | 5,049     | -51                   | -3                  |
| 32    | NA18592 | 15  | 37,531,682  | 37,532,152  | 471       | 10                    | 10                  |
| 33    | AK10    | 15  | 44,647,999  | 44,648,461  | 463       | -178                  | -64                 |
| 34    | AK10    | 15  | 99,159,012  | 99,159,896  | 885       | 154                   | -33                 |
| 35    | NA18582 | 17  | 27,130,737  | 27,131,657  | 921       | 193                   | -237                |
| 36    | AK10    | 18  | 33,560,058  | 33,560,631  | 574       | -19                   | -31                 |
| 37    | AK4     | 18  | 45,948,975  | 45,952,385  | 3,411     | 0                     | 130                 |
| 38    | NA18564 | 18  | 48,716,563  | 48,717,029  | 467       | -34                   | 19                  |
| 39    | NA18564 | 18  | 53,097,735  | 53,099,716  | 1,982     | 380                   | 53                  |
| 40    | NA18552 | 18  | 72,476,184  | 72,476,990  | 807       | -73                   | -375                |
| 41    | NA18999 | 19  | 59,548,033  | 59,548,601  | 569       | -170                  | -158                |
| 42    | AK8     | 21  | 28,634,908  | 28,635,998  | 1,091     | -143                  | -26                 |

## G. Suppl. Table 7. List of 5,177 CNVE identified in 30 Asians

See *SuppTable7\_5177CNVE\_EthnicComparison.xls*

Depicted below is a preview for the part of this file.

| Index | CNVE               | Individual               | chr | length | start   | stop    | log2ratio              | Total | CH8 | JPT | KOR | gene_annotation         | Is_validated? | is_potentially<br>Asian_specific? | GSV_CNVR |
|-------|--------------------|--------------------------|-----|--------|---------|---------|------------------------|-------|-----|-----|-----|-------------------------|---------------|-----------------------------------|----------|
| 1     | Asians30_CNVR_1.1  | NA18947,NA18972,NA18564, | 1   | 103530 | 736271  | 839800  | 0.43,0.33,0.51,0.48    | 4     | 1   | 3   | 0   | utr:NCRNA001115,LOC64   | YES           | NO                                | CNVR5.1  |
| 2     | Asians30_CNVR_1.2  | NA18942,NA18542          | 1   | 4097   | 934543  | 938639  | -0.81,0.78             | 2     | 1   | 1   | 0   | promoter:ISG15          | YES           | YES                               | -        |
| 3     | Asians30_CNVR_1.3  | NA18968,NA18969          | 1   | 548883 | 802861  | 1351743 | 0.4,0.36               | 2     | 0   | 2   | 0   | CDS:SAMD11,NOC2L,KI     | YES           | YES                               | -        |
| 4     | Asians30_CNVR_1.4  | NA18542                  | 1   | 2403   | 923968  | 926370  | 0.82                   | 1     | 1   | 0   | 0   | CDS:HES4:promoter:HES   | NO            | YES                               | -        |
| 5     | Asians30_CNVR_1.5  | NA18942                  | 1   | 2436   | 981285  | 983720  | -0.67                  | 1     | 0   | 1   | 0   | promoter:AGRN:utr:AGR   | NO            | YES                               | -        |
| 6     | Asians30_CNVR_1.6  | NA18542                  | 1   | 943    | 1102010 | 1102952 | 0.73                   | 1     | 1   | 0   | 0   | intron:TTL10            | NO            | YES                               | -        |
| 7     | Asians30_CNVR_1.7  | NA18526                  | 1   | 5421   | 1154213 | 1159633 | 0.55                   | 1     | 1   | 0   | 0   | CDS:B3GALT6:promoter    | NO            | YES                               | -        |
| 8     | Asians30_CNVR_2.1  | AK10                     | 1   | 3552   | 1433831 | 1437382 | 0.97                   | 1     | 0   | 0   | 1   | promoter:ATAD3A         | NO            | YES                               | -        |
| 9     | Asians30_CNVR_2.2  | NA18969                  | 1   | 19859  | 1433831 | 1453689 | 0.45                   | 1     | 0   | 1   | 0   | CDS:ATAD3A:promoter:    | NO            | YES                               | -        |
| 10    | Asians30_CNVR_3.1  | NA18942                  | 1   | 705    | 1542495 | 1543199 | -0.71                  | 1     | 0   | 1   | 0   | intron:MIB2             | NO            | YES                               | -        |
| 11    | Asians30_CNVR_4.1  | NA18566,NA18542,NA18582  | 1   | 81781  | 1575237 | 1657017 | 0.33,0.76,0.59         | 3     | 3   | 0   | 0   | CDS:CDC2L1,LOC72866     | YES           | NO                                | CNVR17.1 |
| 12    | Asians30_CNVR_4.2  | NA18537,NA18552          | 1   | 45586  | 1624860 | 1670445 | 0.81,-0.37             | 2     | 2   | 0   | 0   | CDS:CDC2L1,CDC2L2,S     | YES           | NO                                | CNVR17.1 |
| 13    | Asians30_CNVR_4.3  | NA18973                  | 1   | 15613  | 1625061 | 1640673 | 0.53                   | 1     | 0   | 1   | 0   | CDS:CDC2L1,CDC2L2,u     | YES           | NO                                | CNVR17.1 |
| 14    | Asians30_CNVR_4.4  | AK18                     | 1   | 19289  | 1637729 | 1657017 | -0.42                  | 1     | 0   | 0   | 1   | CDS:CDC2L1,CDC2L2,S     | YES           | NO                                | CNVR17.1 |
| 15    | Asians30_CNVR_5.1  | NA18542                  | 1   | 2290   | 1978127 | 1980416 | 0.78                   | 1     | 1   | 0   | 0   | intron:PRKCZ            | NO            | YES                               | -        |
| 16    | Asians30_CNVR_6.1  | AK12,NA18951,NA18969,NA1 | 1   | 4453   | 2227388 | 2231840 | 0.43,0.43,0.56,0.4,0.4 | 5     | 1   | 3   | 1   | CDS:SKI:promoter:SKI:ut | YES           | YES                               | -        |
| 17    | Asians30_CNVR_6.2  | AK6                      | 1   | 32093  | 2224073 | 2256165 | 0.44                   | 1     | 0   | 0   | 1   | CDS:SKI,MORN1:promo     | NO            | YES                               | -        |
| 18    | Asians30_CNVR_7.1  | AK6                      | 1   | 16227  | 2310992 | 2327218 | 0.4                    | 1     | 0   | 0   | 1   | CDS:MORN1,RER1,PEX1     | NO            | YES                               | -        |
| 19    | Asians30_CNVR_7.2  | NA18542                  | 1   | 1255   | 2324440 | 2325694 | 0.55                   | 1     | 1   | 0   | 0   | promoter:PEX10:utr:RER  | NO            | YES                               | -        |
| 20    | Asians30_CNVR_8.1  | NA18969                  | 1   | 70098  | 2403604 | 2473701 | 0.39                   | 1     | 0   | 1   | 0   | CDS:PLCH2,PANK4,HES     | NO            | YES                               | -        |
| 21    | Asians30_CNVR_8.2  | AK6                      | 1   | 30859  | 2442099 | 2472957 | 0.39                   | 1     | 0   | 0   | 1   | CDS:PANK4,HES5:prom     | NO            | YES                               | -        |
| 22    | Asians30_CNVR_9.1  | AK20,NA18972             | 1   | 1650   | 2476434 | 2478083 | -0.73,-0.66            | 2     | 0   | 1   | 1   | intergenic              | YES           | YES                               | -        |
| 23    | Asians30_CNVR_10.1 | NA18942                  | 1   | 1103   | 2480304 | 2481406 | -0.93                  | 1     | 0   | 1   | 0   | CDS:TNFRSF14:intron:TN  | NO            | YES                               | -        |
| 24    | Asians30_CNVR_10.2 | NA18972                  | 1   | 444    | 2480963 | 2481406 | -0.7                   | 1     | 0   | 1   | 0   | CDS:TNFRSF14:intron:TN  | NO            | YES                               | -        |
| 25    | Asians30_CNVR_11.1 | NA18973                  | 1   | 2974   | 2570328 | 2573301 | 0.559                  | 1     | 0   | 1   | 0   | intergenic              | NO            | YES                               | -        |
| 26    | Asians30_CNVR_12.1 | AK6                      | 1   | 18856  | 2965717 | 2984572 | 0.4                    | 1     | 0   | 0   | 1   | CDS:PRDM16:promoter:    | NO            | YES                               | -        |

## H. Suppl. Table 8. List of OMIM genes in identified CNVs

See *SuppTable8\_1843\_OMIMgene.xls*

Depicted below is a preview for the part of this file.

| Gene     | Chr | GeneStatus*<br>(See Doc.) | context  | Gene                                                                         | OMIM_Num | Method*<br>(See Doc.) | Comment                       | Disease                                                     |
|----------|-----|---------------------------|----------|------------------------------------------------------------------------------|----------|-----------------------|-------------------------------|-------------------------------------------------------------|
| 40057    | 16  | P                         | CDS      | Septin 1                                                                     | 609062   | REc                   | -                             | -                                                           |
| 40061    | 22  | C                         | CDS      | Septin 5                                                                     | 609062   | REn, Ch               | just 5' of GP188              | -                                                           |
| 40066    | 2   | P                         | CDS      | Septin 10                                                                    | 609062   | REc                   | pseudogene on 8q22.1-q12      | -                                                           |
| A2BP1    | 16  | C                         | intron   | Ataxin 2-binding protein 1                                                   | 609062   | Ch, A, REc            | -                             | -                                                           |
| AATK     | 17  | C                         | CDS      | Apoptosis-associated tyrosine kinase                                         | 609062   | REa, A                | -                             | -                                                           |
| ABCA1    | 9   | C                         | intron   | ATP-binding cassette 1                                                       | 600046   | A, REc                | -                             | HDL deficiency, type 2, 604091 (3)                          |
| ABCA3    | 16  | P                         | UTR      | ATP-binding cassette-3                                                       | 601615   | REc                   | -                             | Surfactant metabolism dysfunction, pulmonary, 3, 610921 (3) |
| ABCA7    | 19  | P                         | intron   | ATP-binding cassette, subfamily A, member 7                                  | 609062   | REc                   | -                             | -                                                           |
| ABCB10   | 1   | P                         | CDS      | ATP-binding cassette, subfamily B, member 10                                 | 609062   | REc                   | pseudogene on 15q13-q14       | -                                                           |
| ABCC11   | 16  | C                         | intron   | ATP-binding cassette, subfamily C, member 11                                 | 607040   | R, REc, Fd            | -                             | [Earwax, wet/dry], 117800 (3)                               |
| ABCC2    | 10  | P                         | CDS      | ATP-binding cassette, subfamily C, member 2                                  | 601107   | A                     | -                             | Dubin-Johnson syndrome, 237500 (3)                          |
| ABCG8    | 2   | P                         | intron   | ATP-binding cassette, subfamily G, member 8                                  | 605460   | REc                   | -                             | Gallbladder disease 4, 611465 (3)                           |
| ABR      | 17  | C                         | CDS      | Active BCR-related gene                                                      | 609062   | A                     | -                             | -                                                           |
| ACACA    | 17  | C                         | intron   | Acetyl-Coenzyme A carboxylase, alpha                                         | 200350   | A                     | proximal to q21.33; others pu | Acetyl-CoA carboxylase deficiency (1)                       |
| ACBD3    | 1   | P                         | intron   | Acyl-Coenzyme A binding domain containing 3                                  | 609062   | R, REc                | -                             | -                                                           |
| ACCN1    | 17  | P                         | intron   | Amiloride-sensitive cation channel 1, neuronal (d                            | 609062   | A                     | -                             | -                                                           |
| ACOT11   | 1   | C                         | CDS      | Acyl-CoA thioesterase 11                                                     | 609062   | REa, R, H             | -                             | -                                                           |
| ACOT2    | 14  | P                         | CDS      | Acyl-CoA thioesterase 2                                                      | 609062   | REc, R                | -                             | -                                                           |
| ACOT7    | 1   | P                         | UTR      | Acyl-CoA thioesterase 7                                                      | 609062   | REc                   | -                             | -                                                           |
| ACR      | 22  | C                         | CDS      | Acrosin                                                                      | 102480   | REa, Ch               | -                             | Male infertility due to acrosin deficiency (2) (?)          |
| ACSL1    | 4   | C                         | UTR      | Acyl-CoA synthetase long-chain family member                                 | 609062   | REb, A                | -                             | -                                                           |
| ACTA2    | 10  | C                         | intron   | Actin, alpha-2, smooth muscle, aorta                                         | 102620   | REa, A                | -                             | Aortic aneurysm, familial thoracic 6, 611788 (3)            |
| ACTG1    | 17  | C                         | CDS      | Actin, gamma-1                                                               | 102560   | REa, A, Fd            | -                             | Deafness, autosomal dominant 20/26, 604717 (3)              |
| ADAM28   | 8   | C                         | promoter | A disintegrin and metalloproteinase domain 28                                | 609062   | REc                   | -                             | -                                                           |
| ADAMTS13 | 9   | P                         | promoter | A disintegrin-like and metalloprotease with thrombospondin type 1 motifs 13  | 604134   | Fd, REc               | -                             | Thrombotic thrombocytopenic purpura, familial, 274150 (3)   |
| ADAMTS9  | 3   | P                         | intron   | A disintegrin-like and metalloproteinase with thrombospondin type 1 motifs 9 | 609062   | A, Psh                | -                             | -                                                           |
| ADAMTSL1 | 9   | P                         | intron   | ADAMTS-like protein 1                                                        | 609062   | REc, H                | -                             | -                                                           |
| ADAMTSL3 | 15  | P                         | intron   | ADAMTS-like protein 3                                                        | 609062   | REc, H                | -                             | -                                                           |
| ADARB2   | 10  | P                         | CDS      | Adenosine deaminase, RNA-specific, B2 (homologous to B1)                     | 609062   | REa                   | -                             | -                                                           |
| ADCY5    | 3   | C                         | intron   | Adenylate cyclase-5                                                          | 609062   | REa, A                | -                             | -                                                           |

**I. Suppl. Table 9. List of microRNAs overlapping the personal CNVs identified in the study**

*See SuppTable9\_miRNA.xls*

*Depicted below is a preview for the part of this file.*

| Sample  | Chr | CNV Start   | CNV Stop    | log2ratio | Accession_# | miRNA_ID    | miRNA Start | miRNA stop  |
|---------|-----|-------------|-------------|-----------|-------------|-------------|-------------|-------------|
| NA18592 | 2   | 132,719,667 | 132,766,153 | 3.391     | MI0003566   | hsa-mir-560 | 132,731,971 | 132,732,065 |
| NA18592 | 22  | 21,484,527  | 21,577,178  | -1.242    | MI0003665   | hsa-mir-650 | 21,495,270  | 21,495,365  |
| NA18547 | 2   | 132,719,667 | 132,766,153 | 3.264     | MI0003566   | hsa-mir-560 | 132,731,971 | 132,732,065 |
| NA18547 | 8   | 145,062,114 | 145,100,595 | 0.37      | MI0003669   | hsa-mir-661 | 145,091,347 | 145,091,435 |
| NA18547 | 17  | 76,247,436  | 77,313,922  | -0.529    | MI0003681   | hsa-mir-657 | 76,713,671  | 76,713,768  |
| NA18547 | 17  | 76,247,436  | 77,313,922  | -0.529    | MI0000814   | hsa-mir-338 | 76,714,278  | 76,714,344  |
| NA18547 | 22  | 21,484,621  | 21,576,911  | -1.875    | MI0003665   | hsa-mir-650 | 21,495,270  | 21,495,365  |
| NA18947 | 2   | 132,719,667 | 132,766,153 | 3.385     | MI0003566   | hsa-mir-560 | 132,731,971 | 132,732,065 |
| NA18947 | 17  | 76,247,436  | 77,313,922  | -0.632    | MI0003681   | hsa-mir-657 | 76,713,671  | 76,713,768  |
| NA18947 | 17  | 76,247,436  | 77,313,922  | -0.632    | MI0000814   | hsa-mir-338 | 76,714,278  | 76,714,344  |
| NA18947 | 22  | 20,999,466  | 21,577,178  | 0.348     | MI0003665   | hsa-mir-650 | 21,495,270  | 21,495,365  |
| NA18972 | 2   | 132,726,662 | 132,755,838 | 3.884     | MI0003566   | hsa-mir-560 | 132,731,971 | 132,732,065 |
| NA18972 | 3   | 196,822,900 | 196,973,214 | 0.355     | MI0003577   | hsa-mir-570 | 196,911,452 | 196,911,548 |
| NA18972 | 17  | 76,247,436  | 77,313,922  | -0.559    | MI0003681   | hsa-mir-657 | 76,713,671  | 76,713,768  |
| NA18972 | 17  | 76,247,436  | 77,313,922  | -0.559    | MI0000814   | hsa-mir-338 | 76,714,278  | 76,714,344  |
| NA18972 | 22  | 21,494,330  | 21,495,768  | -4.601    | MI0003665   | hsa-mir-650 | 21,495,270  | 21,495,365  |
| NA18526 | 17  | 76,247,436  | 77,313,922  | -0.406    | MI0003681   | hsa-mir-657 | 76,713,671  | 76,713,768  |
| NA18526 | 17  | 76,247,436  | 77,313,922  | -0.406    | MI0000814   | hsa-mir-338 | 76,714,278  | 76,714,344  |
| NA18526 | 22  | 21,484,791  | 21,570,549  | -3.037    | MI0003665   | hsa-mir-650 | 21,495,270  | 21,495,365  |
| NA18570 | 2   | 132,719,667 | 132,766,153 | 3.295     | MI0003566   | hsa-mir-560 | 132,731,971 | 132,732,065 |
| NA18570 | 17  | 76,247,436  | 77,313,922  | -0.434    | MI0003681   | hsa-mir-657 | 76,713,671  | 76,713,768  |

**J. Suppl. Table 10. List of fusion gene overlapping the personal CNVs identified in this study**

*See SuppTable10\_fusion\_gene\_list.xls*

*Depicted below is a preview for the part of this file.*

| Index | Fusion Gene       | Sample  | Chr | Length | StartPos    | StopPos     | Log2Ratio | Left Gene | Strand | StartPos    | StopPos     | RightGene | Strand | StartPos    | StopPos     |
|-------|-------------------|---------|-----|--------|-------------|-------------|-----------|-----------|--------|-------------|-------------|-----------|--------|-------------|-------------|
| 1     | PCDHA8-PCDHA9     | NA18592 | 5   | 15,795 | 140,203,406 | 140,219,200 | -0.499    | PCDHA8    | +      | 140,201,091 | 140,203,535 | PCDHA9    | +      | 140,207,541 | 140,372,113 |
| 2     | PCDHA8-PCDHA10    | NA18592 | 5   | 15,795 | 140,203,406 | 140,219,200 | -0.499    | PCDHA8    | +      | 140,201,091 | 140,203,535 | PCDHA10   | +      | 140,215,818 | 140,372,113 |
| 3     | HLA-DRB5-HLA-DRB6 | NA18592 | 6   | 23,305 | 32,605,201  | 32,628,505  | -1.561    | HLA-DRB5  | -      | 32,593,132  | 32,605,984  | HLA-DRB6  | -      | 32,628,468  | 32,635,757  |
| 4     | OR51A4-OR51A2     | NA18592 | 11  | 8,669  | 4,924,706   | 4,933,374   | -0.85     | OR51A4    | -      | 4,923,965   | 4,924,906   | OR51A2    | -      | 4,932,578   | 4,933,519   |
| 5     | PCDHA8-PCDHA9     | NA18547 | 5   | 15,788 | 140,203,413 | 140,219,200 | -0.473    | PCDHA8    | +      | 140,201,091 | 140,203,535 | PCDHA9    | +      | 140,207,541 | 140,372,113 |
| 6     | PCDHA8-PCDHA10    | NA18547 | 5   | 15,788 | 140,203,413 | 140,219,200 | -0.473    | PCDHA8    | +      | 140,201,091 | 140,203,535 | PCDHA10   | +      | 140,215,818 | 140,372,113 |
| 7     | PCDHA8-PCDHA9     | NA18947 | 5   | 15,788 | 140,203,413 | 140,219,200 | -0.496    | PCDHA8    | +      | 140,201,091 | 140,203,535 | PCDHA9    | +      | 140,207,541 | 140,372,113 |
| 8     | PCDHA8-PCDHA10    | NA18947 | 5   | 15,788 | 140,203,413 | 140,219,200 | -0.496    | PCDHA8    | +      | 140,201,091 | 140,203,535 | PCDHA10   | +      | 140,215,818 | 140,372,113 |
| 9     | GSTTP1-GSTTP2     | NA18947 | 22  | 49,240 | 22,676,441  | 22,725,680  | -0.675    | GSTTP1    | -      | 22,670,595  | 22,677,258  | GSTTP2    | -      | 22,715,938  | 22,731,899  |
| 10    | APOBEC3A-APOBEC3B | NA18947 | 22  | 30,133 | 37,686,393  | 37,716,525  | -2.03     | APOBEC3A  | +      | 37,683,473  | 37,689,134  | APOBEC3B  | +      | 37,708,351  | 37,718,729  |
| 11    | PCDHA8-PCDHA9     | NA18972 | 5   | 15,788 | 140,203,413 | 140,219,200 | -0.442    | PCDHA8    | +      | 140,201,091 | 140,203,535 | PCDHA9    | +      | 140,207,541 | 140,372,113 |
| 12    | PCDHA8-PCDHA10    | NA18972 | 5   | 15,788 | 140,203,413 | 140,219,200 | -0.442    | PCDHA8    | +      | 140,201,091 | 140,203,535 | PCDHA10   | +      | 140,215,818 | 140,372,113 |
| 13    | PCDHA8-PCDHA9     | NA18526 | 5   | 15,788 | 140,203,413 | 140,219,200 | -0.301    | PCDHA8    | +      | 140,201,091 | 140,203,535 | PCDHA9    | +      | 140,207,541 | 140,372,113 |
| 14    | PCDHA8-PCDHA10    | NA18526 | 5   | 15,788 | 140,203,413 | 140,219,200 | -0.301    | PCDHA8    | +      | 140,201,091 | 140,203,535 | PCDHA10   | +      | 140,215,818 | 140,372,113 |
| 15    | LOC646227-BTNL3   | NA18526 | 5   | 21,388 | 180,341,884 | 180,363,271 | -2.526    | LOC646227 | +      | 180,341,824 | 180,345,858 | BTNL3     | +      | 180,348,507 | 180,366,333 |
| 16    | C4B-C4A           | NA18526 | 6   | 32,950 | 32,071,612  | 32,104,561  | -0.52     | C4B       | +      | 32,057,813  | 32,078,436  | C4A       | +      | 32,090,550  | 32,111,173  |
| 17    | OR51A4-OR51A2     | NA18526 | 11  | 8,669  | 4,924,706   | 4,933,374   | -0.93     | OR51A4    | -      | 4,923,965   | 4,924,906   | OR51A2    | -      | 4,932,578   | 4,933,519   |
| 18    | APOBEC3A-APOBEC3B | NA18526 | 22  | 30,242 | 37,686,284  | 37,716,525  | -0.7      | APOBEC3A  | +      | 37,683,473  | 37,689,134  | APOBEC3B  | +      | 37,708,351  | 37,718,729  |
| 19    | PCDHA8-PCDHA9     | NA18570 | 5   | 15,795 | 140,203,406 | 140,219,200 | -0.485    | PCDHA8    | +      | 140,201,091 | 140,203,535 | PCDHA9    | +      | 140,207,541 | 140,372,113 |
| 20    | PCDHA8-PCDHA10    | NA18570 | 5   | 15,795 | 140,203,406 | 140,219,200 | -0.485    | PCDHA8    | +      | 140,201,091 | 140,203,535 | PCDHA10   | +      | 140,215,818 | 140,372,113 |
| 21    | PRB1-PRB2         | NA18570 | 12  | 37,652 | 11,398,210  | 11,435,861  | -0.486    | PRB1      | -      | 11,396,024  | 11,399,791  | PRB2      | -      | 11,435,743  | 11,439,765  |
| 22    | PIGZ-MFI2         | NA18942 | 3   | 77,622 | 198,161,095 | 198,238,716 | -0.32     | PIGZ      | -      | 198,157,611 | 198,180,101 | MFI2      | -      | 198,214,553 | 198,241,083 |
| 23    | PIGZ-MFI2         | NA18942 | 3   | 77,622 | 198,161,095 | 198,238,716 | -0.32     | PIGZ      | -      | 198,157,611 | 198,180,101 | MFI2      | -      | 198,230,221 | 198,241,083 |
| 24    | WHSC2-POLN        | NA18942 | 4   | 89,201 | 1,962,765   | 2,051,965   | -0.34     | WHSC2     | -      | 1,954,241   | 1,980,757   | POLN      | -      | 2,043,443   | 2,200,756   |

## K. Suppl. Table 11. Modified PANTHER ontology analysis

*See SuppTable11\_GeneOntology.xls*

*Depicted below is a preview for the part of this file.*

| Copy Number Gain                   |       |         | Copy Number Loss                   |       |         |
|------------------------------------|-------|---------|------------------------------------|-------|---------|
| Modified_Panther_BiologicalProcess | count | percent | Modified_Panther_BiologicalProcess | count | percent |
| Cell adhesion                      | 4     | 1.3%    | Cell adhesion                      | 14    | 8.2%    |
| Develop. Proc.                     | 39    | 13.1%   | Develop. Proc.                     | 7     | 4.1%    |
| Immunity and defense               | 30    | 10.1%   | Immunity and defense               | 37    | 21.6%   |
| Miscellaneous                      | 93    | 31.3%   | Miscellaneous                      | 51    | 29.8%   |
| Nucleic Acid Metabolism            | 57    | 19.2%   | Nucleic Acid Metabolism            | 4     | 2.3%    |
| Protein Processing                 | 21    | 7.1%    | Protein Processing                 | 15    | 8.8%    |
| Sensory perception                 | 19    | 6.4%    | Sensory Perception                 | 17    | 9.9%    |
| Signal Transduction                | 34    | 11.4%   | Signal transduction                | 26    | 15.2%   |
| SUM                                | 297   |         | SUM                                | 171   |         |

**L. Suppl. Table 12. Examples of Genes showing different copy number status between this study and Conrad *et al.*<sup>1</sup>**

| Gene Name        | Absolute CN status in 30 Asians (this study) | Absolute CN status in 90 Asians (Conrad <i>et al.</i> ) |
|------------------|----------------------------------------------|---------------------------------------------------------|
| RHD              | 3/30 CN Loss<br>2/30 CN Gain                 | 88/88 CN Gain                                           |
| SIRPB1           | 29/30 CN Loss                                | 38/90 CN Gain                                           |
| CR1              | 29/30 CN Loss                                | 88/90 CN Gain                                           |
| PGA3, PGA4, PGA5 | 28/30 CN Loss                                | 0/90 CN Loss                                            |
| NOTCH2           | 30/30 CN Gain                                | 0/90 CN Gain                                            |
| OR4S1            | 27/30 CN Gain                                | 0/90 CN Gain                                            |
| FAM21A, FAM21B   | 30/30 CN Loss                                | 0/89 CN Loss                                            |
| MUC6             | 30/30 CN Gain                                | 1/87 CN Gain                                            |
| UPK3B            | 30/30 CN Loss                                | 31/77 CN Loss<br>15/77 CN Gain                          |

**M. Suppl. Figure 1. Content of repetitive sequence for the Agilent 24M array set and the NimbleGen 42M array set.**

For the CNVs that are called by a single platform, we have used the respective probe distributions to filter out any CNVs that “cannot” be called by either of the platform due to lack of enough probes.

X-axis is the density (frequency/total number of CNVEs). Y-axis is the coverage of the CNVEs with repeatmasker + Segmental duplications. 0.8 means that 80% of those CNVEs covered with CNVs. The dashed line represents 0.75 and the percentage close to that line is the percentage of CNVEs, 75% or more of which is covered with repeats or segmental duplications.

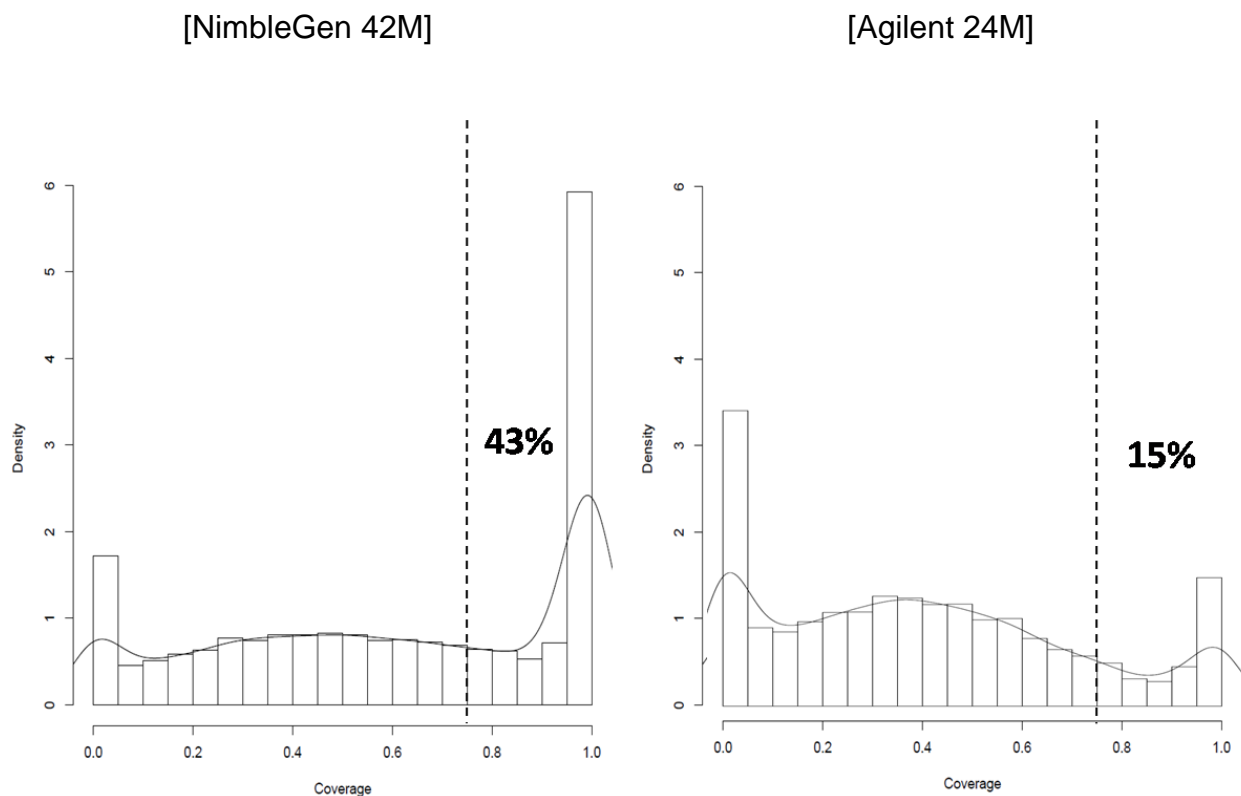

**N.Suppl. Figure 2. Modified Receiver Operator curve (ROC) analysis for filter training using data for AK1.**

We used "modified ROC curve", using PPV for the Y-axis and (1-relative sensitivity) in X-axis because this is more advantageous for training our filter conditions. The predominance of non-CNV areas in the genome results in artificially high values for specificity with a limited distribution. PPV was used for the Y-axis to better discriminate between the performances of different parameters.

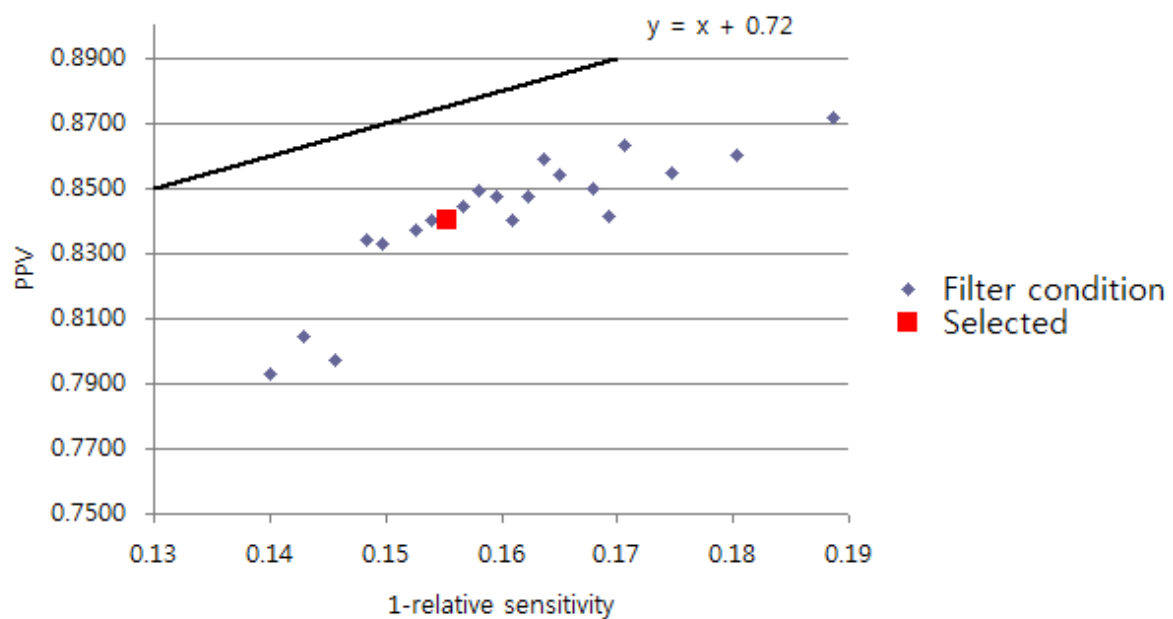

**O.Suppl. Figure 3. Read-depth information for 721 validated CNVs in AK1 using data for AK1 and NA10851**

Top panel, Read depth of AK1; Middle panel, Read depth of NA10851; Bottom panel, logarithm of read-depth ratio (AK1 read-depth/NA10851 read-depth)

See *SuppFig3\_ReadDepth.pdf*

*Depicted below is a preview for the part of this file*

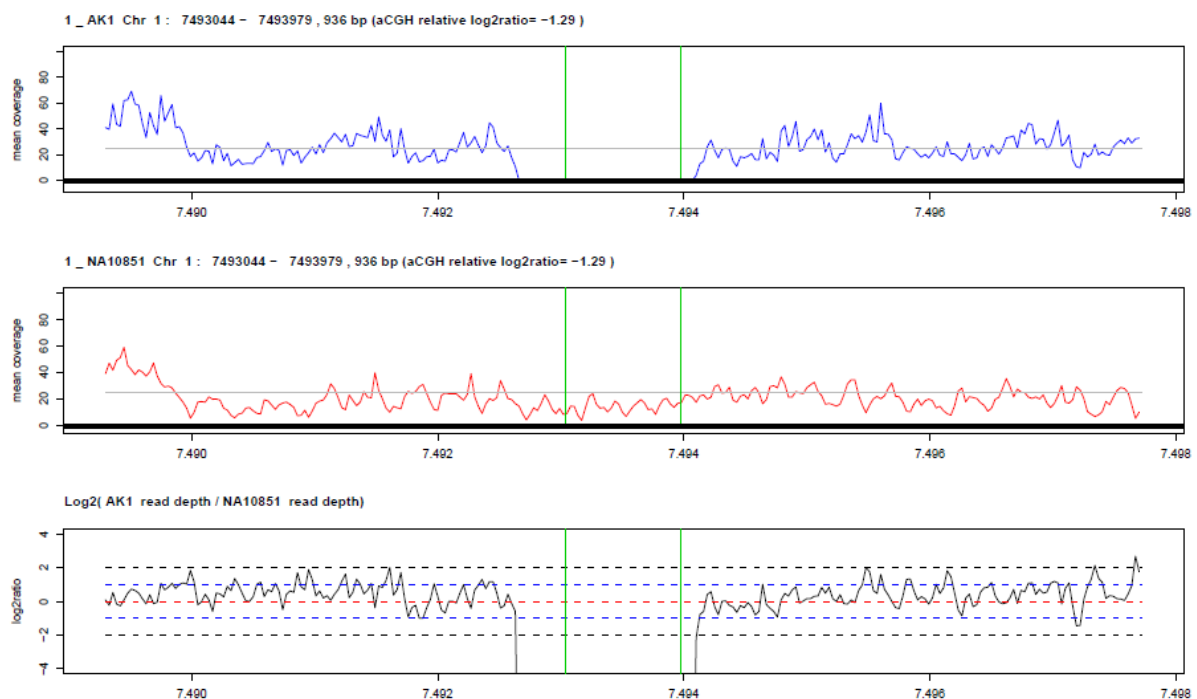

**P.Suppl. Figure 4. Application of the absolute CNV calling algorithm and confirmation of results using read-depth sequence information**

In regions where the reference sample possesses two copies, absolute log<sub>2</sub> ratio of the segment is identical to its relative log<sub>2</sub> ratio.

For complete loss regions of NA10851, test sample log<sub>2</sub> ratios are generally very high and unstable. In other cases where the reference sample has a copy number loss (of 1 copy) or gain, array CGH will yield a positive call if the test sample has two copies. If the copy number of a given genomic segment in the test sample is identical to the corresponding genomic segment in NA10851, this CNV will not be detected by aCGH.

### (a) An example of an overt CN gain

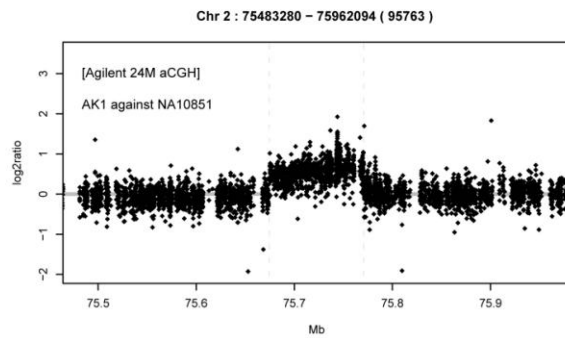

CN gain is identified in aCGH.

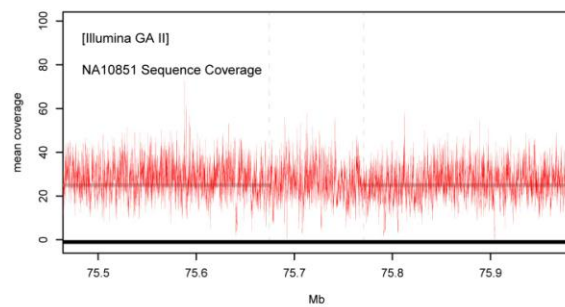

NA10851 has no CNV on the region.  
(by read-depth and aCGH information)

Overt call.

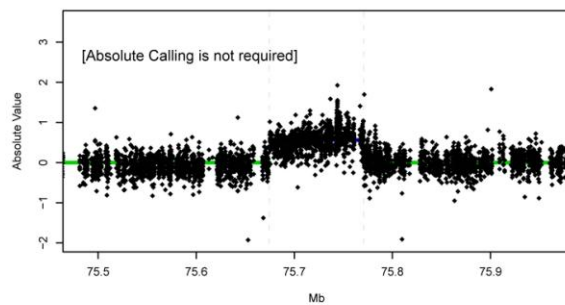

Absolute calling is not required.

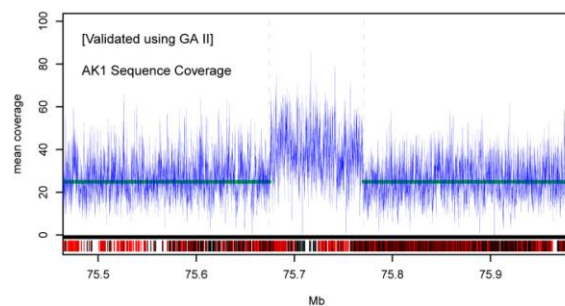

Absolute CN gain for the test sample is confirmed  
by read-depth of AK1 sequencing.

## (b) An example of an overt CN loss

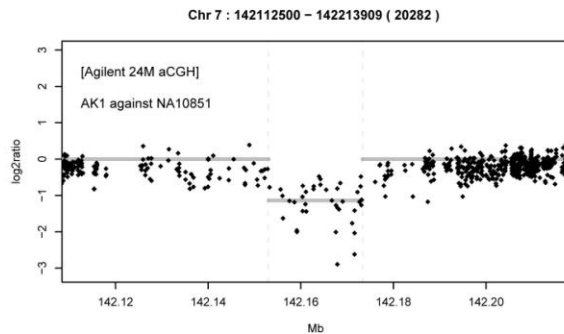

CN loss is identified in aCGH.

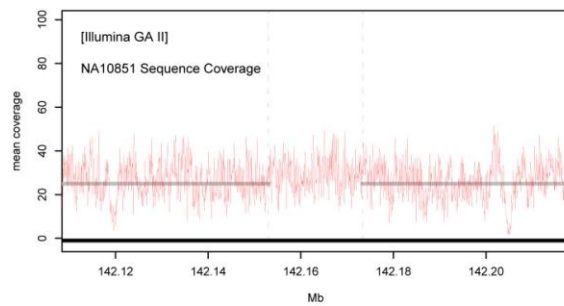

NA10851 has no CNV on the region.  
(by read-depth and aCGH information)

Overt call.

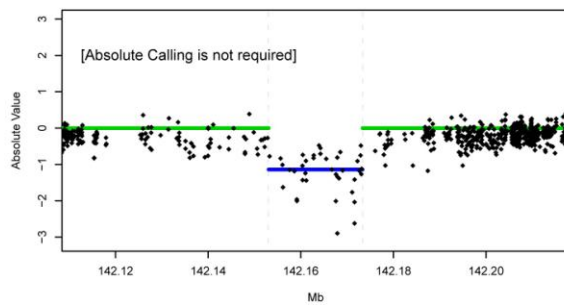

Absolute calling is not required.

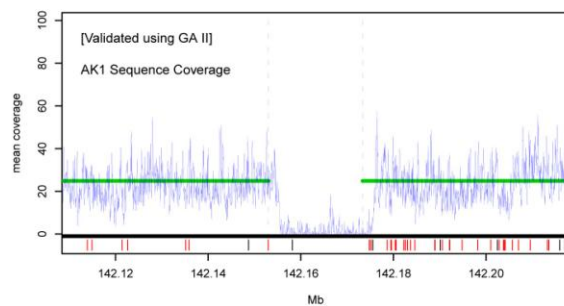

Absolute CN loss for the test sample is confirmed  
by read-depth of AK1 sequencing

**(c) An example of an obscure CN gain (removed by absolute calling algorithm)**

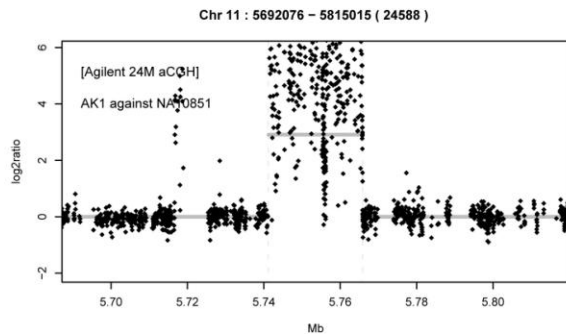

High CN gain is identified in aCGH

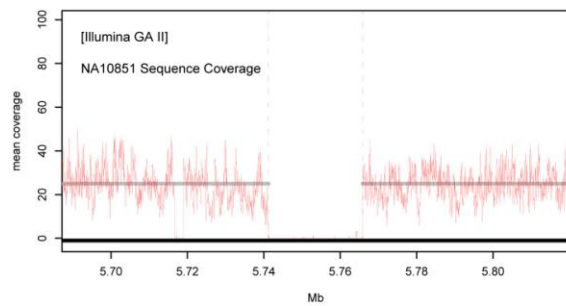

NA10851 has complete CN loss on the region.

Obscure call.

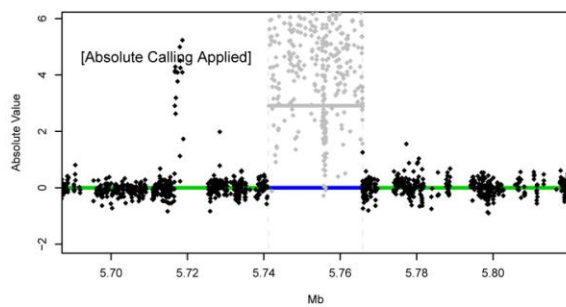

Absolute calling is necessary and applied.

Corrected absolute log<sub>2</sub>ratio shows no evidence of CN gain for the test sample.

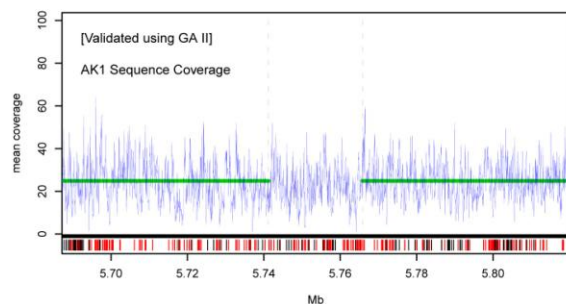

CN normal is confirmed by read-depth of AK1 sequencing.

**(d) An example of an obscure CN gain (removed by absolute calling algorithm)**

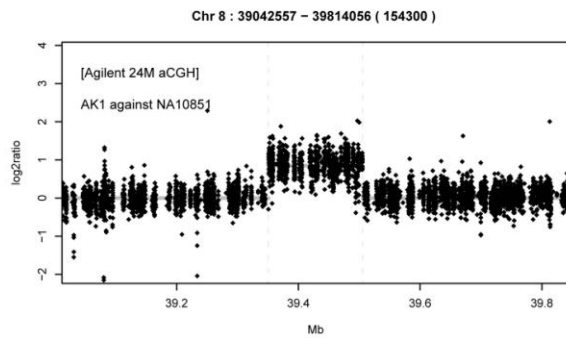

CN gain is identified in aCGH.

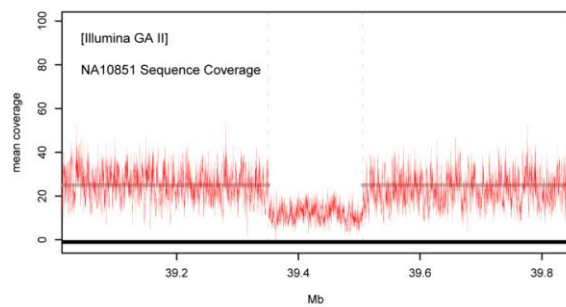

NA10851 has heterozygous CN loss on the region.

Obscure call.

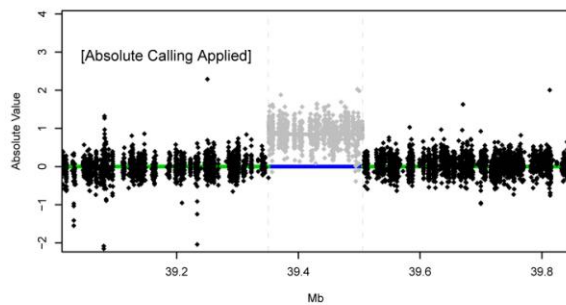

Absolute calling is necessary and applied.

Corrected absolute log2ratio shows no evidence of CN gain for the test sample.

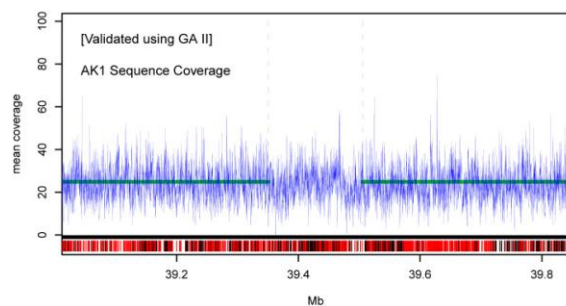

CN normal is confirmed by read-depth of AK1 sequencing.

**(e) An example of an obscure CN loss (removed by absolute calling algorithm)**

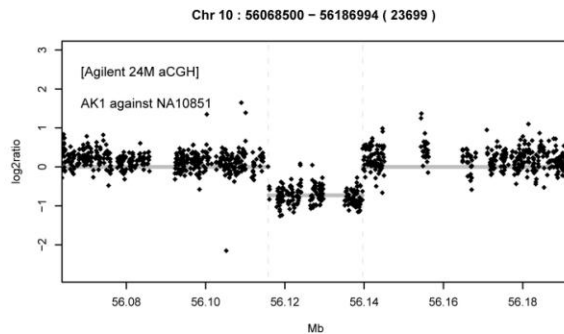

CN loss is identified in aCGH.

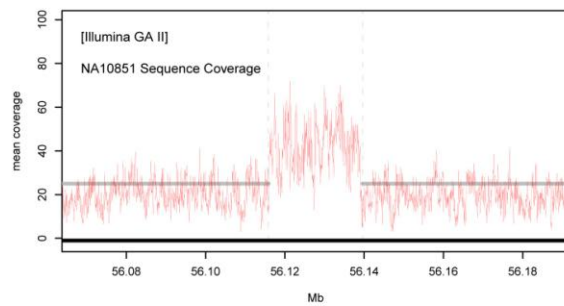

NA10851 has CN gain on the region.

Obscure call.

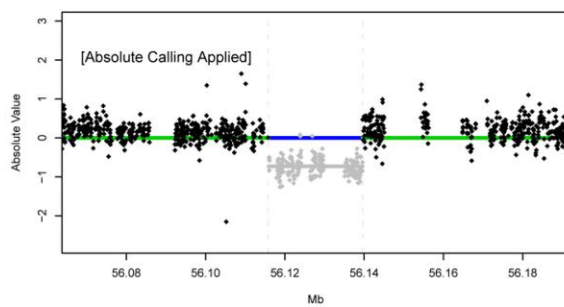

Absolute calling is necessary and applied.

Corrected absolute log2ratio shows no evidence of CN loss for the test sample.

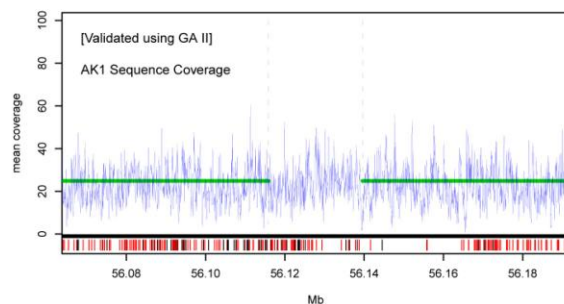

CN normal is confirmed by read-depth of AK1 sequencing.

**(f) An example of a covert CN loss**

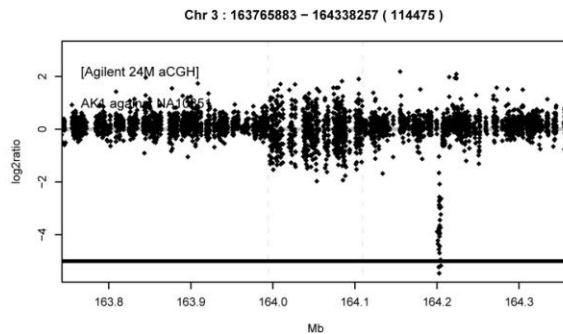

aCGH reported no CNV in this region.

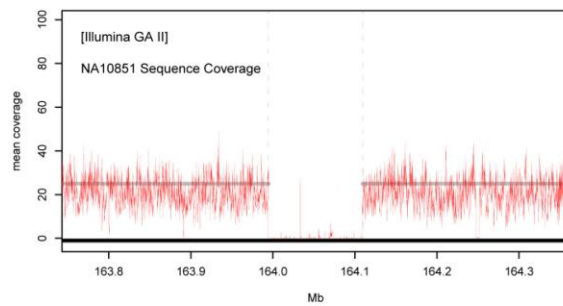

NA10851 has complete CN loss on the region.

A candidate for covert (cryptic) call.

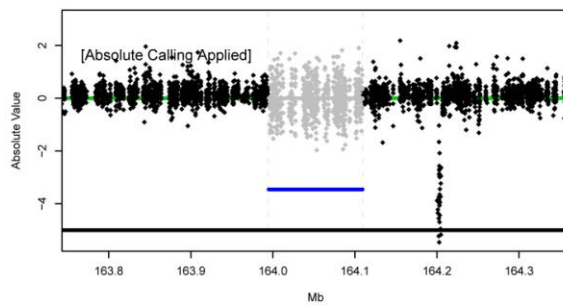

Absolute calling is necessary and applied.

Corrected absolute log2ratio shows complete CN loss for the test sample.

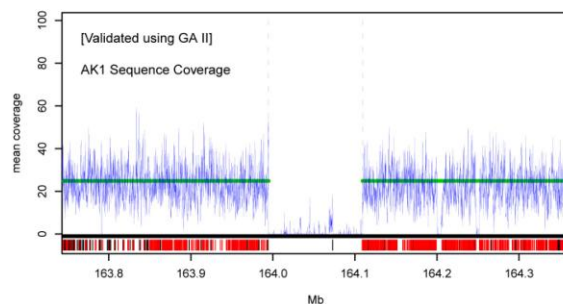

The complete CN loss of the test sample is confirmed by read-depth of AK1 sequencing.

## (g) An example of a covert CN loss

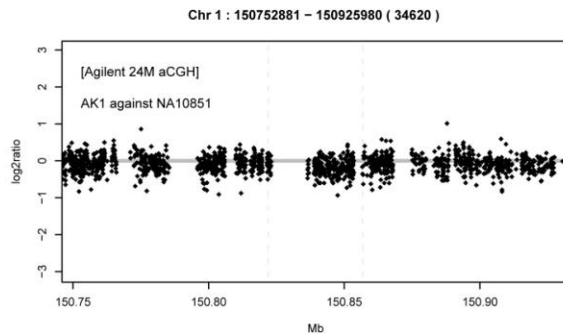

aCGH reported no CNV in this region.

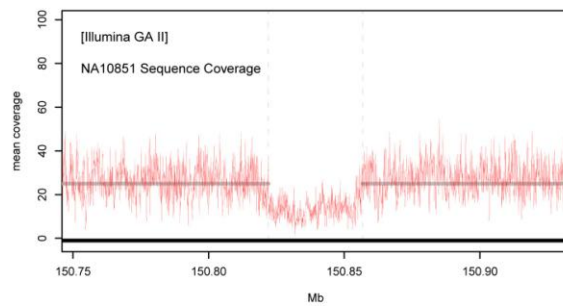

NA10851 has heterozygous CN loss on the region.

A candidate for covert (cryptic) call.

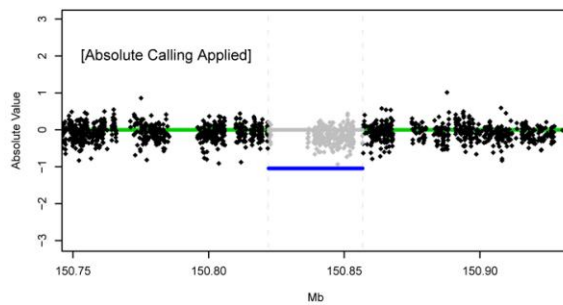

Absolute calling is necessary and applied.

Corrected absolute log2ratio shows heterozygous CN loss for the test sample.

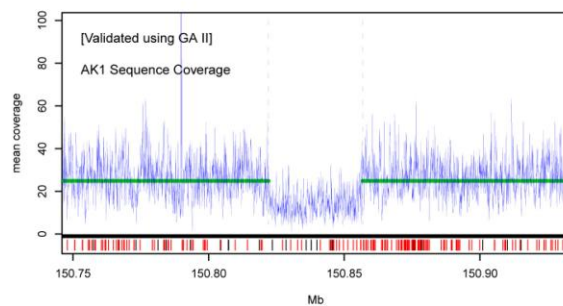

The heterozygous CN loss of the test sample is confirmed by read-depth of sequencing.

## (h) An example of a covert CN gain

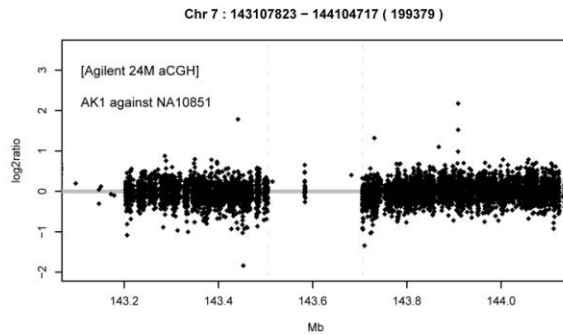

aCGH reported no CNV in this region.

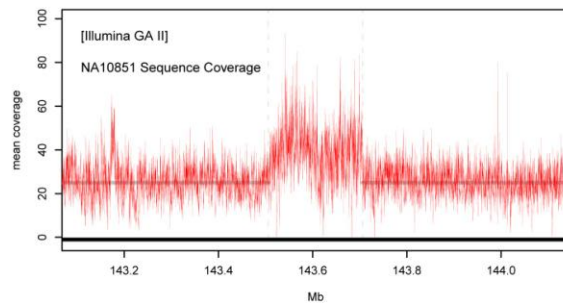

NA10851 has CN gain on the region.

A candidate for covert (cryptic) call.

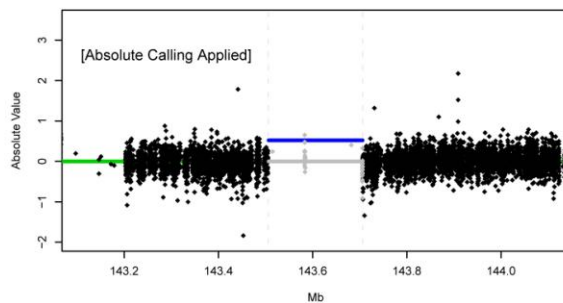

Absolute calling is necessary and applied.

Corrected absolute log2ratio shows CN gain for the test sample.

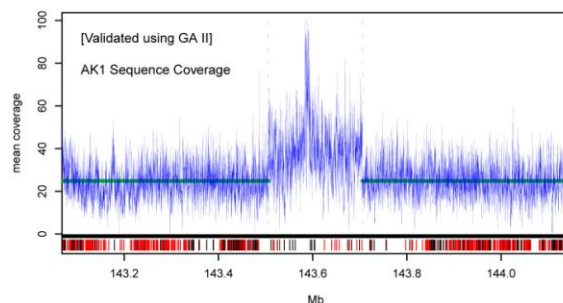

The CN gain of the test sample is confirmed by read-depth of sequencing.

## (i) An example of a covert CN gain

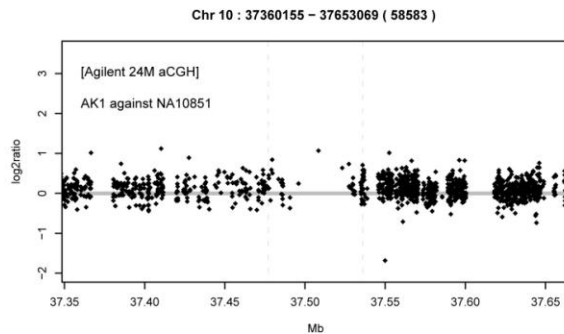

aCGH reported no CNV in this region.

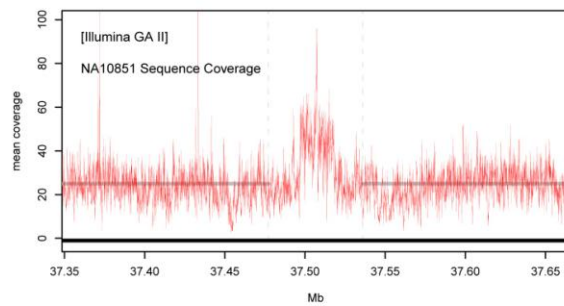

NA10851 has CN gain on the region.

A candidate for covert (cryptic) call.

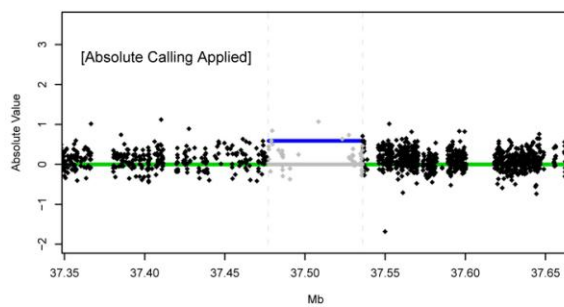

Absolute calling is necessary and applied.

Corrected absolute log2ratio shows CN gain for the test sample.

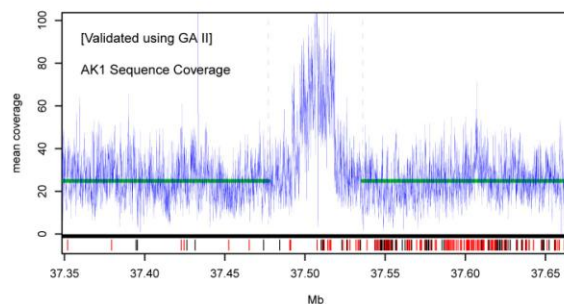

The CN gain of the test sample is confirmed by read-depth of sequencing.

**Q. Suppl. Figure 5. Copy number loss is the predominant type of human copy number variation.**

The proportion of CN loss and gain is disparate in overt calls (CNV segments in NA10851 CN normal regions) vs. obscure calls (CNV segments in NA10851 CNV regions). Applying the absolute calling algorithm to the obscure calls increases corrects the total ratio of CN loss significantly, which is more consistent with previous studies.

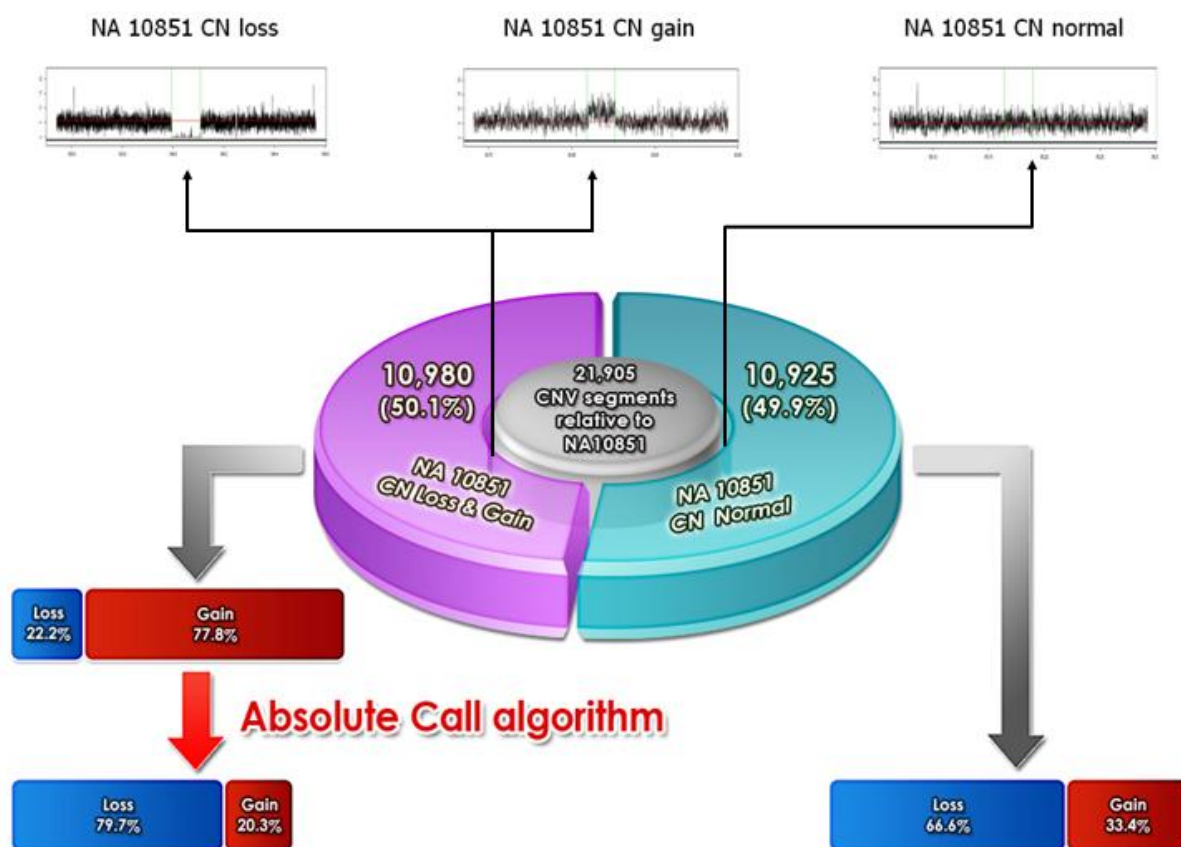

### R.Suppl. Figure 6. Definition of CNVs, CNVR, and CNVE

CNV calls with any overlap are combined into CNV regions, while CNV elements are composed of CNV calls that have more than 50% of their sequence in common.

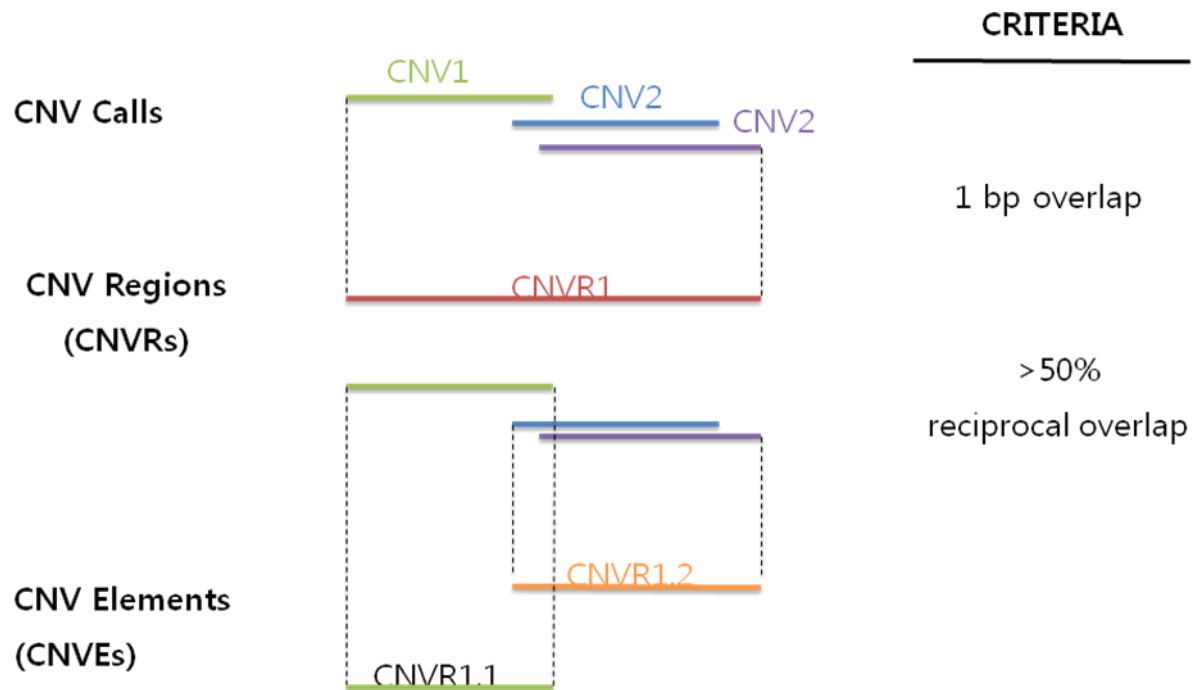

**S. Suppl. Figure 7. A Comparison between the Agilent 24M array platform and the NimbleGen 42M array platform using genomic DNA from AK1**

Left circle of the Venn diagram represents 722 CNV segments obtained from Agilent 24M aCGH (Agilent CNVs) and right circle represents CNV segments found by the NimbleGen 42M platform (NimbleGen CNVs). Intersection of the two circles represents 450 Agilent CNVs which have at least one bp overlap with the NimbleGen CNVs. Outer circle on the right with blue color denotes 1,282 NimbleGen CNVs which do not overlap with Agilent CNVs at all (NimbleGen-specific CNVs). Dotted right circle represents NimbleGen-specific CNVs which are included in 105k genotyping array set. Right panel indicates that 1,282 NimbleGen-specific CNVs can be divided into three classes as described in the figure (See **Supplementary Note** for detailed explanation).

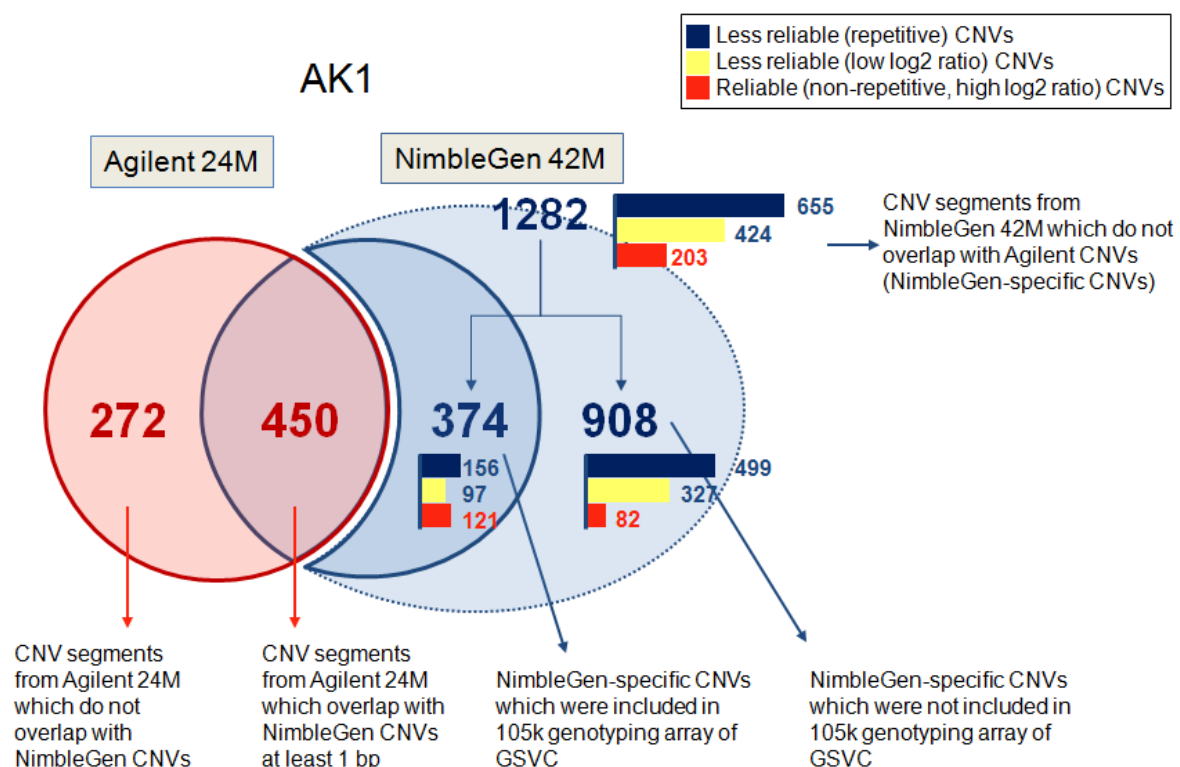

**T. Suppl. Figure 8. Mendelian inconsistency of CNVs in a large Mongolian family using 180k probe aCGH array**

Investigation of Mendelian inconsistency in a Mongolian family, pre and post corrections for NA10851 copy number status. 6.42% of the meioses were Mendelian inconsistent using relative copy number data. 2.59% of the meioses were Mendelian inconsistent using absolute copy number data. An example of relative and absolute genotype calls for a CNV on chromosome 6 in this Mongolian family is shown on the right.

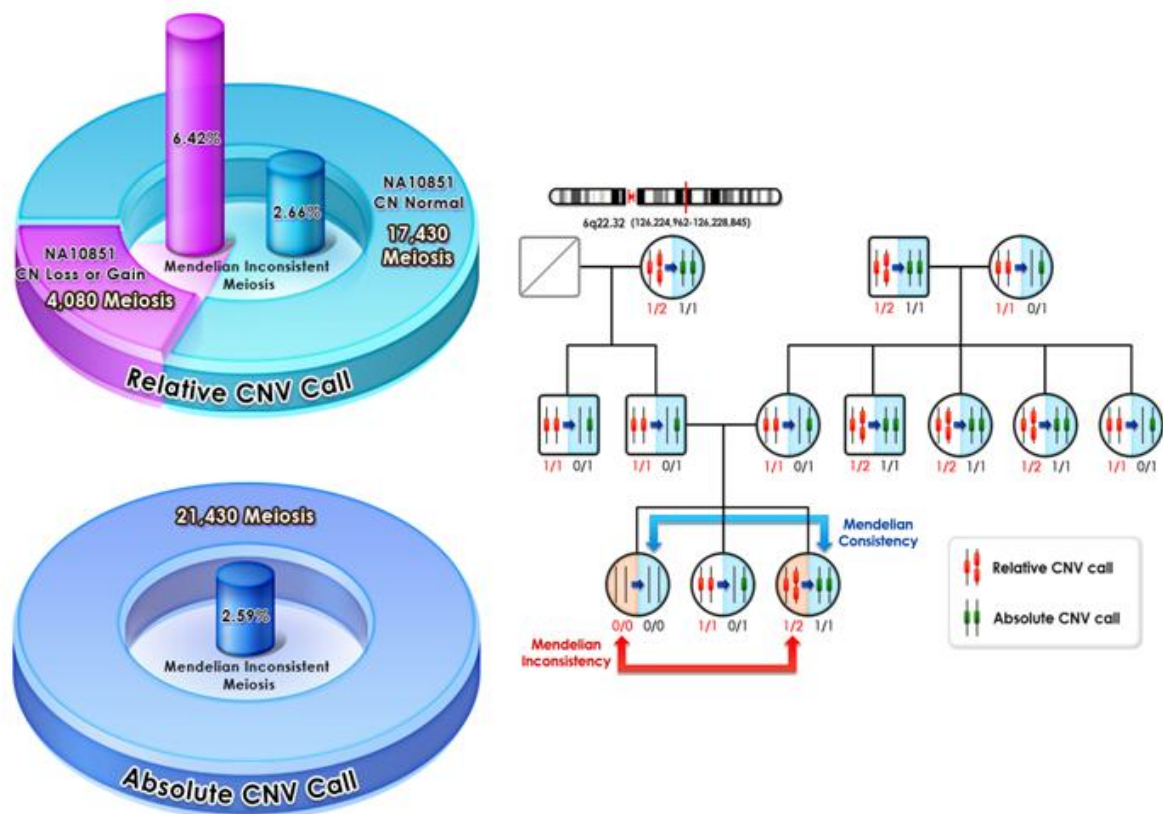

**U. Suppl. Figure 9. Comparison of CNV calls made with the Agilent 24M aCGH platform and data from a 105k CNV genotyping platform by Genome Structural Variation Consortium (GSVC)**

CNV segments of NA12878 (a, HapMap sample with European origin) and NA19240 (b, HapMap sample with African origin) obtained from Agilent 24M (in this study) and from 105k CNV genotyping array (GSVC<sup>1</sup>) were compared by one base pair overlap. Left circle of the Venn diagram represents CNV segments obtained from Agilent 24M aCGH in this study (Gemomic Medicine Institute(GMI) CNVs) and right circle represents CNV segments found by 105K platform by GSVC<sup>1</sup> (GSVC CNVs). Intersection of two circles represents GMI CNVs which have at least one bp overlap with the GSVC CNVs. Right outer circle with red color denotes GSVC CNVs which do not overlap with GMI CNVs at all (See Supplementary Note for detailed explanation).

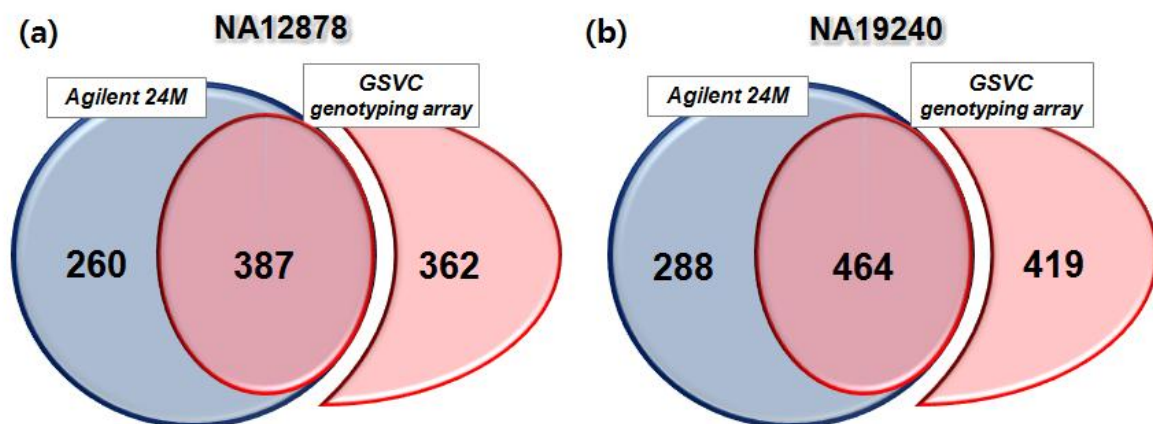

**V. Suppl. Figure 10.** The hierarchical selection of CNVRs which were included on the 180k probe aCGH array. CNV regions in higher tier (inner) data sets were given deferential preference with regards to size and breakpoints when overlapped with lower tier databases.

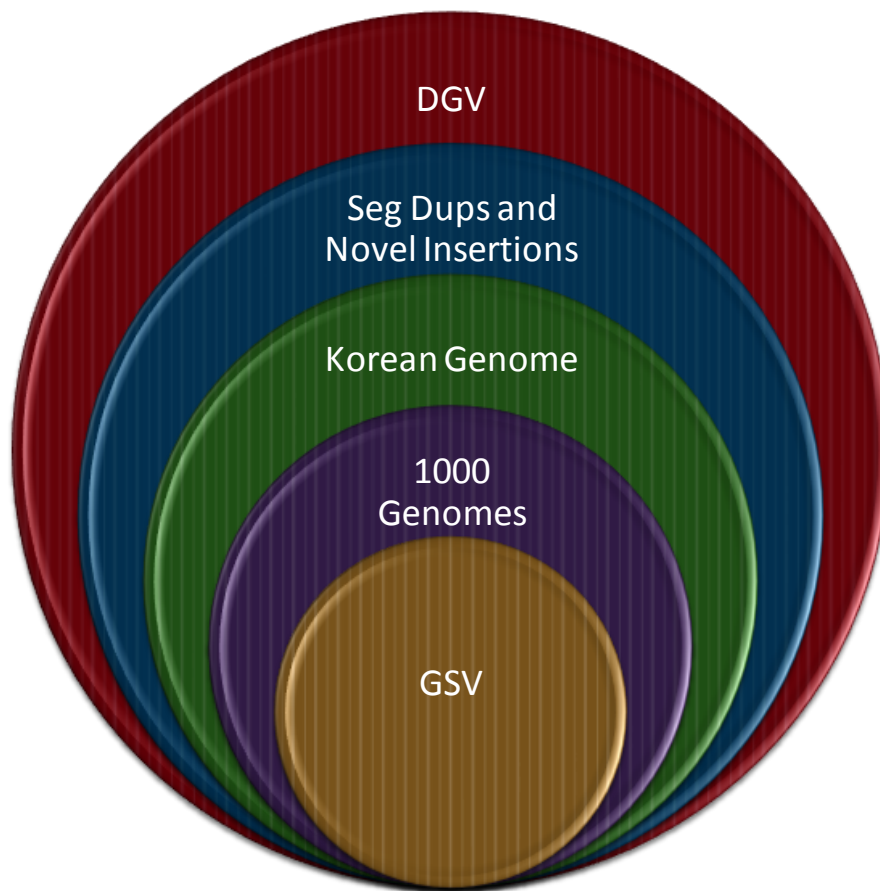

**W. Suppl. Figure 11. The distribution of probes within the targeted CNVRs in 180k probe aCGH array.** For each CNVR, there are between 6 and 9 distinct probes. Where possible, each probe corresponds to a single CNVR to ensure a clear-cut analysis of overlapping CNVRs.

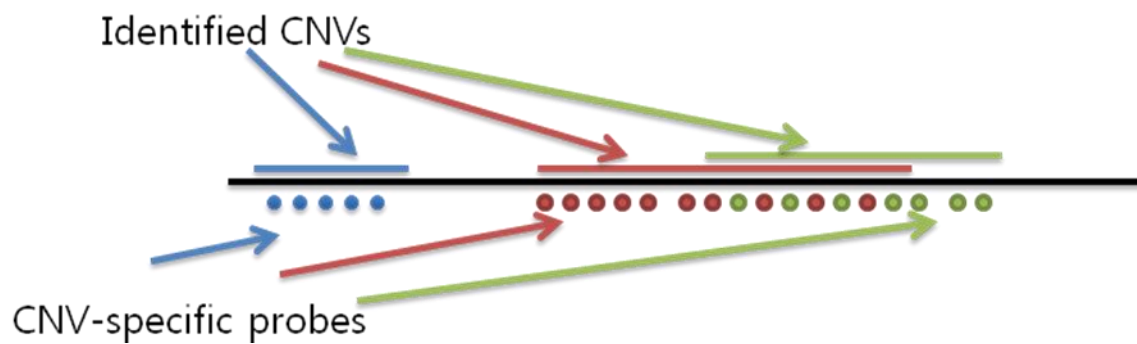

## X. Suppl. Note

### **Platform difference**

The platform and design used to build the 24Million CNV identification array set in this study are comparable to, but different from, the 42Million NimbleGen array set used in a previous study by Conrad *et al*<sup>1</sup>. A large portion of the human genome consists of moderately and highly repetitive sequences, where identifying CNVs using hybridization methods is less feasible due to the lack of high quality oligonucleotide probes. To design a high performance CNV identification array set, we excluded low quality probes using a homology filter. As a consequence, most of the moderately and highly repetitive DNA sequences and some segmental duplications were not included on the 24Million Agilent CNV identification array set. This resulted in an effectively smaller portion of the genome being assayed for CNVs with a lower false positive rate. The median inter-probe distance (in the interrogated areas) for the 24Million Agilent array set was 40 bp, which is significantly smaller than that of the 42Million NimbleGen array platform at 50 bp. In contrast, the NimbleGen 42M array set includes a large number of probes in moderately – highly repetitive genomic regions (e.g., 43% of the probes are in highly repetitive regions), since their probes were designed to be evenly distributed throughout the entire human genome (Supplementary Figure 1). Hence, the Agilent 24Million array set platform interrogates a smaller portion of the genome at higher resolution, whereas the NimbleGen 42Million array set platform interrogates a larger section of the genome that includes a majority of repeats and segmental duplications, at a slightly lower resolution but with more uniformly distributed probes.

To compare these two array sets, the genomic DNA from AK1 were analyzed on both platforms (Supplementary Figure 7). The Agilent 24M platform revealed 722 CNVs. For the NimbleGen 42M platform, the filter conditions used in Conrad *et al*. were applied (i.e.,  $\geq 10$  consecutive probes with an average  $\log_2$  ratio  $\geq 0.1$ , and  $\leq -0.25$  for CN gains and losses, respectively)<sup>1</sup>, resulting in 1,829 CNVs. 62.3% (n=450) of the CNVs identified in AK1 by the Agilent 24M platform overlapped  $\geq 1$  bp with

CNVs identified by the NimbleGen 42M platform. A substantial number of CNVs (n=1,282) were specific to the NimbleGen platform. Further analysis revealed that 655 (51.1%) of these CNVs were in moderately – highly repetitive regions (hence no probes on the Agilent 24M array platform were available to interrogate these regions). Moreover, 424 (33.1%) of the CNVs showed had log2 ratios which did not meet the more stringent filter criteria established for the Agilent 24M platform (Supplementary Table 2). Consequently, only 203 NimbleGen-specific CNVs were relevant to this comparison. The genotyping array of Conrad *et al.*<sup>1</sup> seems to have culled the CNV regions identified from their discovery studies, thereby targeting a selected subset and including fewer repetitive regions. Hence, only 30% (374/1282) of the NimbleGen 42M specific CNVs were included in the genotyping arrays, perhaps reflecting decreased confidence in the remainder of these putative CNV loci.

To further determine how these two aCGH platforms compare in the ultimate CNV calls made, we compared the CNV calls made for NA12878 (CEU) and NA19240 (YRI) using the Agilent 24M platform with those identified by Conrad *et al.*<sup>1</sup> using a 1bp overlap criteria (Supplementary Figure 9). Both of the results showed that ~60% (59.8% and 61.7%, respectively, (Figure 5)) of the CNVs identified by our Agilent 24M platform were also identified with the 105k CNV genotyping platform in Conrad *et al.*<sup>1</sup>, and ~40% (40.2 % and 38.3%, respectively) of the CNVs discovered by the Agilent 24M platform in NA12878 and NA19240 were not captured by the 105k CNV genotyping platform. Taken together, these comparisons indicate that ~40% of the Agilent 24M CNV calls may be platform dependent and not captured by the NimbleGen 42M array set or 105k CNV genotyping platforms used in GSVC data<sup>1</sup>.

Upon analysis of the CNVs for population stratification / differentiation, 1,630 of the 5,177 CNVs were also discovered in the CEU and YRI populations by Conrad *et al.* (Figure 4a and Supplementary Table 7; 5,177-3,547=1,630). If these are considered to represent platform independent CNVs, we would expect approximately 1,100 (1630 X 40%/60%) CNVs calls to be specific to the Agilent platform. However, we identified 3,547 novel CNV regions in our experiments, indicating that ~70% of these may be specific to Asian ethnicities.

### **Technologies for CNV detection; aCGH and massively parallel sequencing**

Recently, many genomic technologies have been used for detecting copy number variation in the human genome<sup>2-4</sup>. Among these, CGH microarrays have been used by the majority of comprehensive studies<sup>1,3,5-7</sup>. The resolution of aCGH platforms has continuously risen to a point where it is now possible to identify CNVs with sizes of only a few hundred bases.

aCGH identifies CNVs in a test sample by comparison to a reference or control sample. Ideally, the control sample is expected to have a normal two copy value for every region across the genome. However, since no known human genomic sample actually has two copies of every segment of the human reference genome (hg18, assembly build 36.3), we have attempted to ascertain the absolute copy number value for each putative CNV region of interest in NA10851, a commonly used reference individual<sup>1,6-7</sup>. This information can then be used to convert the relative copy number information obtained from aCGH experiments to absolute copy numbers.

Research has recently been performed in identifying CNVs through paired-end mapping and/or observing read depth (coverage) changes by massively parallel sequencing technology, but few have validated these findings in depth<sup>4,8-11</sup>. Resequencing methods do not require any reference sample for detecting CNVs. However, paired-end mapping methods have limitations for identifying smaller copy number losses or larger copy number gains, and some regions in the human genome show coverage drops or 'spikes' (due to GC ratio or other uncertain reasons) that can result in many false positive and false negative CNV calls<sup>4,12</sup>. In a previous study, we reported a highly-confident set of CNVs in a Korean individual (AK1), using a combination of next generation sequencing and an earlier version of the 24M array platform<sup>12</sup>. However, only 19.1% of the CNVs detected by this high-resolution aCGH platform could be confirmed by read-depth (sequence coverage). Such a low correlation has also been reported by other groups<sup>9,11</sup>.

From these previous reports, we realized the importance of having sequence data of

NA10851, the control individual used in the present study as well as other large-scale CNV studies. Since aCGH reports CNVs relative to NA10851, the log<sub>2</sub> ratio of CNV calls are comparable with the sequence read-depth (coverage) ratio of a test sample and NA10851 rather than the read-depth change of the test sample alone. In this study, we compared the aCGH results of AK1 with the read-depth ratio of AK1 to NA10851. This resulted in a much higher correlation rate between aCGH and massively parallel sequencing up to ~90% (Details are explained in section below). This higher correlation rate enabled us to validate aCGH results as a whole using genome sequence data. By using this validation data, we adjusted filter conditions to minimize false positive aCGH CNV calls.

### **Training the filtering criteria for calling CNV with aCGH data**

Array CGH reports a differing number of CNV calls under various filter conditions. The ADM-2 algorithm (Agilent Inc. CA) provides an average log<sub>2</sub> ratio and corresponding p-value for each CNV segment.

ADM-2 identified 17,890 unfiltered CNV segments in AK1's genome by aCGH. We then attempted to identify (by visual inspection) significant read-depth ratio (AK1 read depth/NA10851 read depth) change for each putative CNV segment comparing these to the read depth ratio for their flanking genomic regions. Short reads were aligned by single base windows using a random alignment method to calculate genome-wide read-depth. A CNV segment identified by aCGH was considered to be confirmed when a significant change of read depth ratio was obtained for the CNV segment, compared to the flanking regions. Validation of a group of 300 randomly selected segments out of the total 17,890 provided initial filter conditions to minimize false positives (i.e., we empirically determined that each CNV segment should be called by  $\geq 5$  consecutive probes with a p-value of  $< 10^{-7}$  if  $|\log_2 \text{ratio}| \geq 0.5$  and a p-value of  $< 10^{-17}$  if  $0.5 > |\log_2 \text{ratio}| \geq 0.2$ ). Applying these criteria to the entire 17,890 CNV segments identified by aCGH in AK1 resulted in 1,853 primary filtered CNV segments.

Read-depth ratio plots for all 1,853 primary-filtered CNV segments were generated for further filter training. 721 (38.9%) CNV segments showed significant (by visual inspection) read-depth ratio changes which correlated with the aCGH log<sub>2</sub> ratio and thus were thought to be final true positive CNVs in AK1 (Supplementary Figure 3). We set filter conditions by systematically adjusting the threshold log<sub>2</sub> ratios and p-values to minimize false positives while maximizing true positives. Due to the vast predominance of non-CNV areas in the genome, using 'specificity' in the classical sense results in less discrimination between conditions with different performance. We therefore utilized positive predictive value (PPV) to efficiently resolve these differences. Read-depth ratio information for AK1 to NA10851 was used as the gold standard. Modified ROC curves were generated using PPV and relative sensitivity, and final filter conditions were set where both the PPV and relative sensitivity were substantially high (Supplementary Table 1; Supplementary Figure 2). Final filter conditions gave a positive predictive value and relative sensitivity for CNV detection of 0.840 and 0.845, respectively (Supplementary Table 2).

In order to test our established filter conditions, they were applied to 8,241 raw autosomal CNV segments of AK2, identifying 695 filtered segments. The PPV was 0.855, similar to that observed for AK1 (Supplementary Table 2).

### **Absolute Call analysis method**

We are aware of examples where multiple copies of a gene exist in normal individuals. However, for the sake of simplicity, we will use the words 'diploid' and 'two copies' interchangeably when referring to 'normal' copy number segments of a genome.

While adjusting filter conditions using the AK1 and NA10851 sequence, we realized that only approximately half of the filtered AK1 CNV segments were overt CNV calls, or not associated with the CN gain or loss of NA10851 (Supplementary figure 2b). The other half of filtered AK1 CNV segments were 'obscure calls', which were influenced by the copy number state of the corresponding DNA segment in NA10851. In other words, they were explained by CN gain or loss of NA10851 rather than in

AK1. For example, if the test sample has 2 copies (normal) of a given CNV region and NA10851 has 1 copy of the same genomic region, aCGH identifies this as a relative copy number gain in the test sample (obscure call, Supplementary Figure 4d). This is because aCGH compares test and reference samples as described above. In addition, relative log2 ratios in the CNV segment can be under/overestimated and in extreme cases, CN loss of a test sample can be called as CN gain, or *vice versa*, if the reference sample simultaneously has homozygous deletion or higher CN gain, respectively, in the genomic region. (another example of an obscure call; Figure 2a). On the other hand, when the test and the reference sample have identical copy number states for a genomic region (e.g., each individual has a 1 copy of a genomic segment), aCGH fails to identify the region as a CNV and therefore this is referred to as a “covert” CNV (Supplementary Figure 4f-4i). Obscure and covert calls should be modified and reinstated, respectively, to identify the absolute copy number. In other words, we should identify the absolute copy number state for each CNV region in each person being studied, rather than the relative copy number state compared to a reference sample.

By combining aCGH and next generation sequencing data for the reference sample, NA10851, we were able to design new methods to identify the absolute copy number for all regions in each individual tested. The application of this algorithm is not limited to only this study, but can be implemented to any aCGH experiment using NA10851 as a reference. First, we identified CNV regions in NA10851 itself, using high resolution array CGH data for 30 Asian women (present study), together with 19 CEU women, 20 YRI women and 1 polymorphic discovery resource individual<sup>1</sup> as well as whole genome sequence data for NA10851 (present study). Since CNV regions in NA10851 are likely to cause obscure CNV calls in a test sample unless the test sample has identical CN status to NA10851, they are likely to be more frequently identified CNV regions in these studies. Hence, high frequency CNV regions in these studies are good candidates for CNVs in NA10851. CNV loci where  $\geq 10$  out of 70 individuals showed copy number variations were investigated by sequence read-depth data of NA10851, using 30, 50, 100 or 1000 bp windows for CNVs with sizes of <1 kb, >1 kb, >100 kb and >1 Mb, respectively. Genomic regions

with substantially higher or lower coverage than their flanking regions were considered to have copy number gain or loss. Using these methods, we identified ~550 putative CNV regions in NA10851. This combination of high resolution aCGH and massively parallel sequencing effectively identified validated CNVs in NA10851.

Using the NA10851 CNV data, an absolute calling algorithm was developed. CNV regions in NA10851 were categorized into 0-copy regions, 1-copy regions, copy number gain regions and complex regions, where sequencing read-depth was close to 0, significantly lower than flanking regions, significantly higher than flanking regions, and not evenly distributed, respectively. Different categories of NA10851 CNV regions required different strategies to calculate absolute calls.

**a. NA10851 2-copy region.**

If a CNV segment of the test sample does not overlap with any CNVs in NA10851, it is considered to be located in the 2 copy region of NA10851. Absolute log<sub>2</sub> ratio of the segment is identical to its relative log<sub>2</sub> ratio (Supplementary Figures 4a-4b)

**b. NA10851 0-copy region**

If a CNV segment of test sample overlaps with one of the complete loss regions in NA10851, its log<sub>2</sub> ratio becomes unstable since the aCGH intensity of NA10851 is close to 0. Generally, regardless of real copy number status of the test sample, the log<sub>2</sub> ratio becomes very large in value and very sensitive to the degree of background noise (Supplementary Figures 4c, 4f). Therefore, the alternative log<sub>2</sub> ratio was calculated by taking the ratio of region's signal intensity in the test sample over the average signal intensity of test sample, and substituted for relative log<sub>2</sub> ratio. If the alternative absolute log<sub>2</sub> ratio value met final filter criteria, it was considered as a positive CNV call.

$$\log_2 \text{ratio}_{abs} = \log_2 \left( \frac{\overline{\text{signal intensity}}_{\text{CNVR, sample}}}{\overline{\text{signal intensity}}_{\text{slide, sample}}} \right)$$

### c. NA10851 1-copy or CN gain region

In these cases, if the sample copy number is two (or normal), array CGH will yield a positive call (Supplementary Figures 4d-e, 4g-4i). However, if the sample copy number is identical to that of NA10851, array CGH will miss the region (Supplementary Figures 4g-i).

If a CNV segment of a sample overlaps one of these regions (obscure call), its log<sub>2</sub> ratio should be recalculated, since the copy number of the reference sample is not two (normal). Absolute log<sub>2</sub> ratio is calculated using the following formula.

$$\log_2 \text{ratio}_{\text{absolute}} = \log_2 \text{ratio}_{\text{relative}} + \log_2 \left( \frac{\overline{\text{Coverage}}_{\text{CNV, NA10851}}}{\overline{\text{Coverage}}_{\text{whole-genome, NA10851}}} \right)$$

If the absolute log<sub>2</sub> ratio value meets the final filtering criteria, it is included as a positive CNV call (with corrected log<sub>2</sub> ratio).

If none of the CNV segments of a sample overlaps one of these regions, the relative log<sub>2</sub> ratio for the region is first calculated from normalized aCGH data using log<sub>2</sub> ratio of all the probes in the corresponding region. Absolute log<sub>2</sub> ratio is then determined as below.

$$\log_2 \text{ratio}_{\text{absolute}} = \overline{\log_2 \text{ratio}}_{\text{probes in region}} + \log_2 \left( \frac{\overline{\text{Coverage}}_{\text{CNV, NA10851}}}{\overline{\text{Coverage}}_{\text{whole-genome, NA10851}}} \right)$$

If the absolute log<sub>2</sub> ratio value meets the final filter criteria, it is included as a positive CNV call.

### d. NA10851 complex CNV region

For segments that overlap complex coverage regions, we convert the relative log<sub>2</sub> ratio into an absolute log<sub>2</sub> ratio by the following equation

$$\log_2\text{ratio}_{\text{absolute}} = \log_2\text{ratio}_{\text{relative}} + \log_2\left(\frac{\overline{\text{Coverage}}_{\text{CNV, NA10851}}}{\overline{\text{Coverage}}_{\text{whole-genome, NA10851}}}\right)$$

When we applied the absolute call algorithm to CNV segments from 30 Asian women, 48% (10,558) of the 21,905 total relative CNV segments were candidates for modification, since they overlapped NA10851 CNV regions (Figure 2b). Out of 10,558, 6,197 false positives were removed and 4,361 segments with under/overestimated log2 ratio had their log2 ratio corrected. In addition, 4,139 false negatives were identified. The copy number gain to loss ratio of the obscure calls was corrected from a predominance in gains to a predominance in losses using the absolute call algorithm, consistent with the ratios of gains and losses previously observed in other studies (Supplementary Figure 5).

### **Gene ontology analysis**

Among 5,177 CNVEs, 383 and 1,059 were found to have CN gain and CN loss, respectively, in more than or equal to 10% of 30 Asians and were considered as Asian common CNVEs. When we counted genes in which coding sequences (CDS) overlapped with common CNVEs, 229 and 159 genes were found to be located in CN gain and CN loss regions, respectively. When we utilized PANTHER ontology (<http://www.pantherdb.org>) using “NCBI *H. sapiens*” option for classifying 229 genes with common CN gains, 184 genes were matched with 26 Biological Process terms in Panther database. We reclassified 26 terms into 8 major categories to simply visualize them in Figure 4b. For common CN losses, 132 of 159 genes were matched with 22 Biological Process terms, which were reclassified into 8 major categories in Figure 4b. Details of genes and gene ontology terms were listed in Supplementary Table 12.

## Y.References

1. Conrad, D.F. et al. Origins and functional impact of copy number variation in the human genome. *Nature* (2009).
2. Scherer, S.W. et al. Challenges and standards in integrating surveys of structural variation. *Nat Genet* **39**, S7-15 (2007).
3. Hurles, M.E., Dermitzakis, E.T. & Tyler-Smith, C. The functional impact of structural variation in humans. *Trends Genet* **24**, 238-45 (2008).
4. Bentley, D.R. et al. Accurate whole human genome sequencing using reversible terminator chemistry. *Nature* **456**, 53-9 (2008).
5. Carter, N.P. Methods and strategies for analyzing copy number variation using DNA microarrays. *Nat Genet* **39**, S16-21 (2007).
6. Perry, G.H. et al. The fine-scale and complex architecture of human copy-number variation. *Am J Hum Genet* **82**, 685-95 (2008).
7. Redon, R. et al. Global variation in copy number in the human genome. *Nature* **444**, 444-54 (2006).
8. Alkan, C. et al. Personalized copy number and segmental duplication maps using next-generation sequencing. *Nat Genet* **41**, 1061-7 (2009).
9. Korbel, J.O. et al. Paired-end mapping reveals extensive structural variation in the human genome. *Science* **318**, 420-6 (2007).
10. Wang, J. et al. The diploid genome sequence of an Asian individual. *Nature* **456**, 60-5 (2008).
11. Yoon, S., Xuan, Z., Makarov, V., Ye, K. & Sebat, J. Sensitive and accurate detection of copy number variants using read depth of coverage. *Genome Res* **19**, 1586-92 (2009).
12. Kim, J.I. et al. A highly annotated whole-genome sequence of a Korean individual. *Nature* **460**, 1011-5 (2009).
