# Supplementary material for: Discovery of common Asian copy number variants using integrated high-resolution array CGH and massively parallel DNA sequencing
Source: Springer Nature journal article supplement (doi:10.1038/ng.555), 2010-04-04
Supplement: 41588_2010_BFng555_MOESM3_ESM.pdf [file 41588_2010_BFng555_MOESM3_ESM.pdf]

1\_AK1 Chr 1 : 7493044 - 7493979 , 936 bp (aCGH relative log2ratio= -1.29)

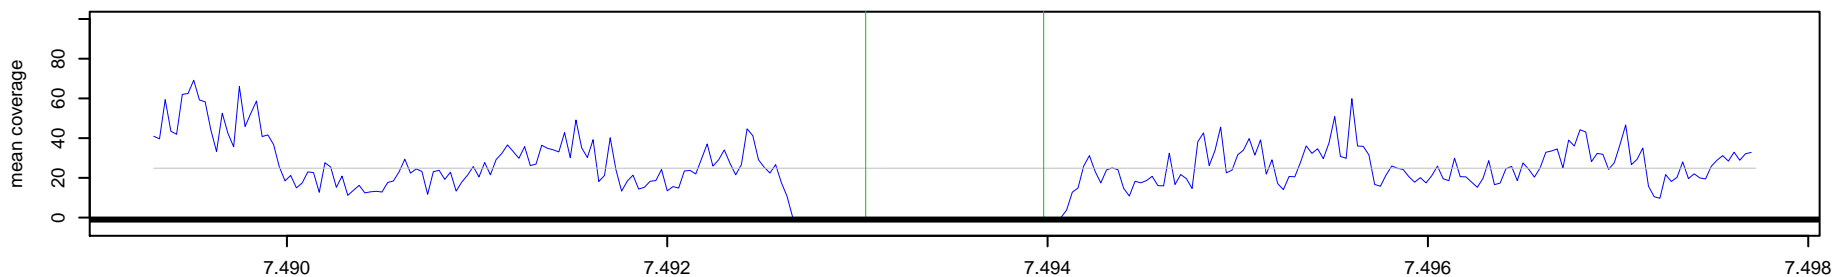

1\_NA10851 Chr 1 : 7493044 - 7493979 , 936 bp (aCGH relative log2ratio= -1.29)

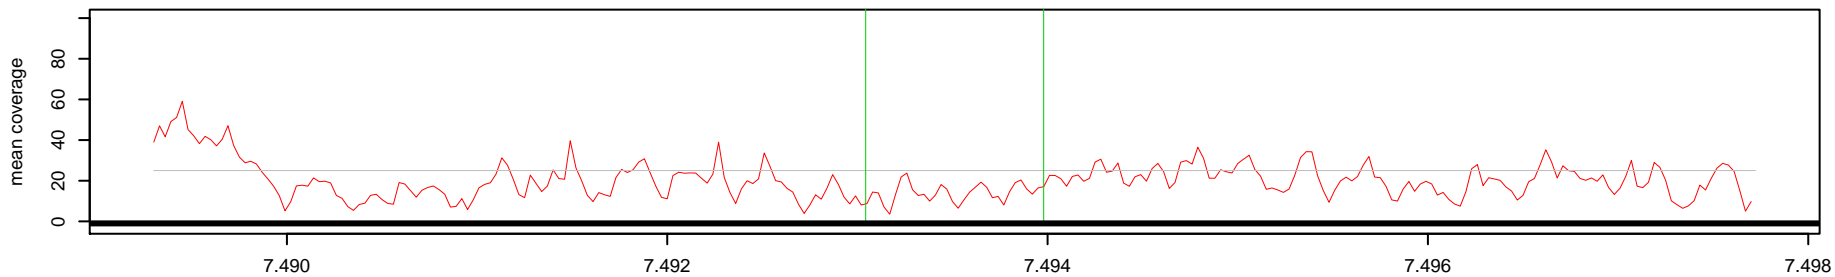

Log2( AK1 read depth / NA10851 read depth)

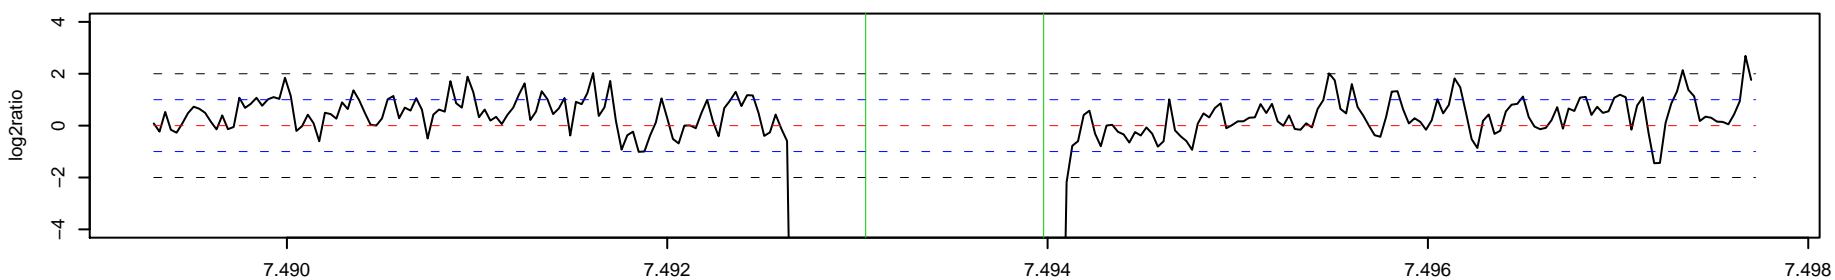

2\_AK1 Chr 1 : 10404929 - 10406229 , 1301 bp (aCGH relative log2ratio= -0.95)

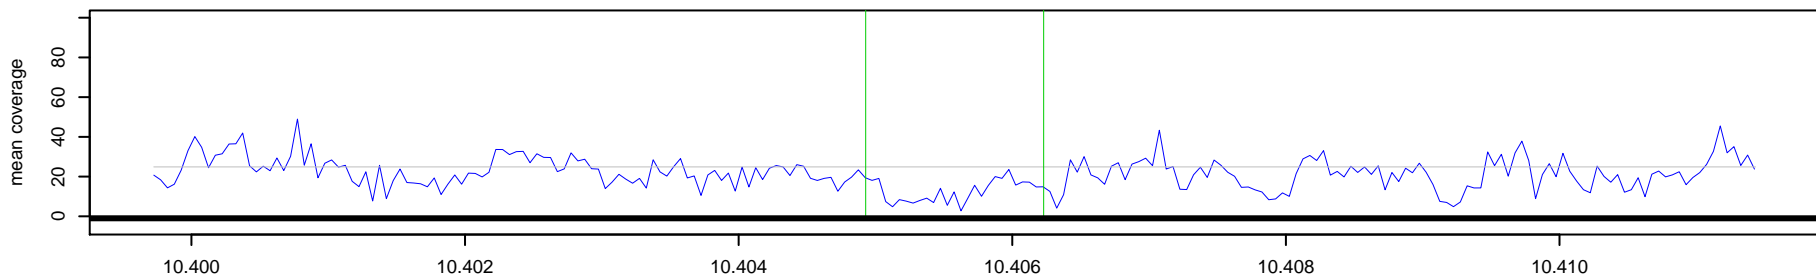

2\_NA10851 Chr 1 : 10404929 - 10406229 , 1301 bp (aCGH relative log2ratio= -0.95)

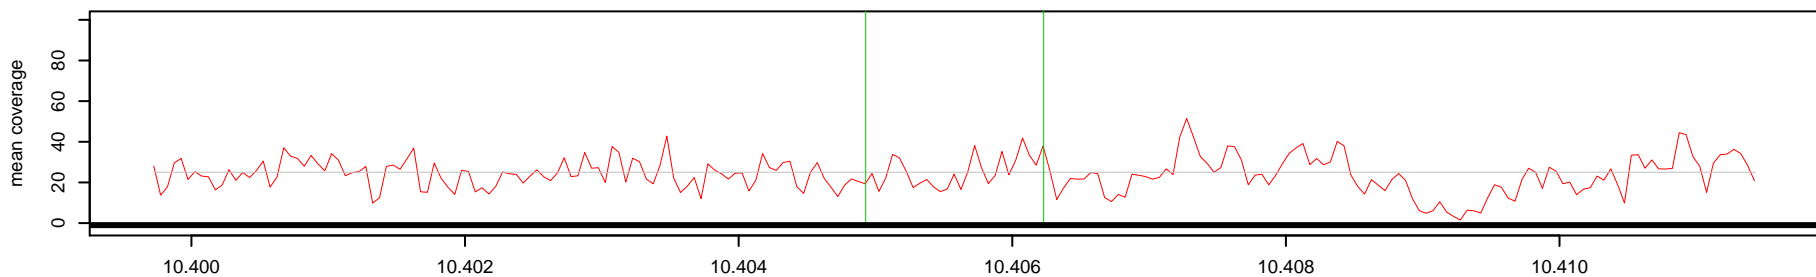

Log2( AK1 read depth / NA10851 read depth)

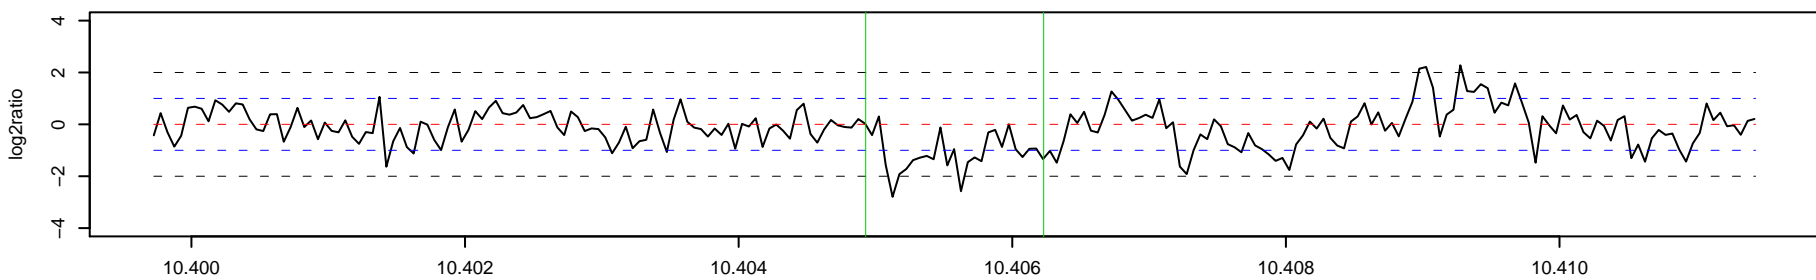

3\_AK1 Chr 1 : 12820351 - 13086898 , 266548 bp (aCGH relative log2ratio= 0.42 )

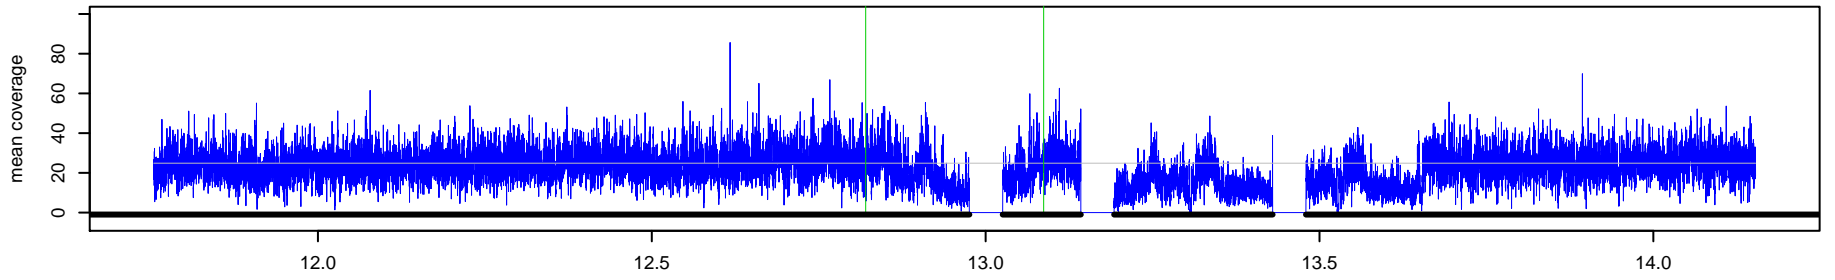

3\_NA10851 Chr 1 : 12820351 - 13086898 , 266548 bp (aCGH relative log2ratio= 0.42 )

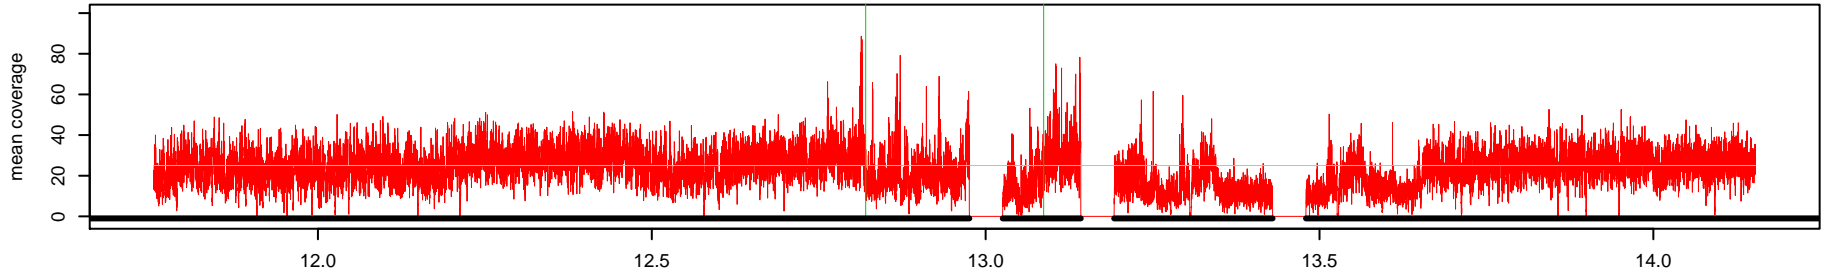

Log2( AK1 read depth / NA10851 read depth)

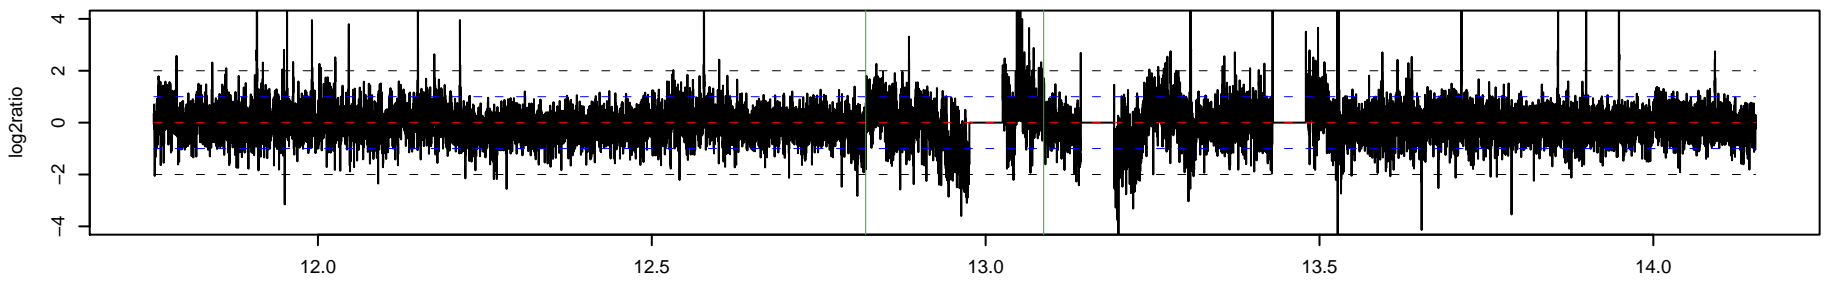

4\_AK1 Chr 1 : 14309636 - 14311391 , 1756 bp (aCGH relative log2ratio= -1.72 )

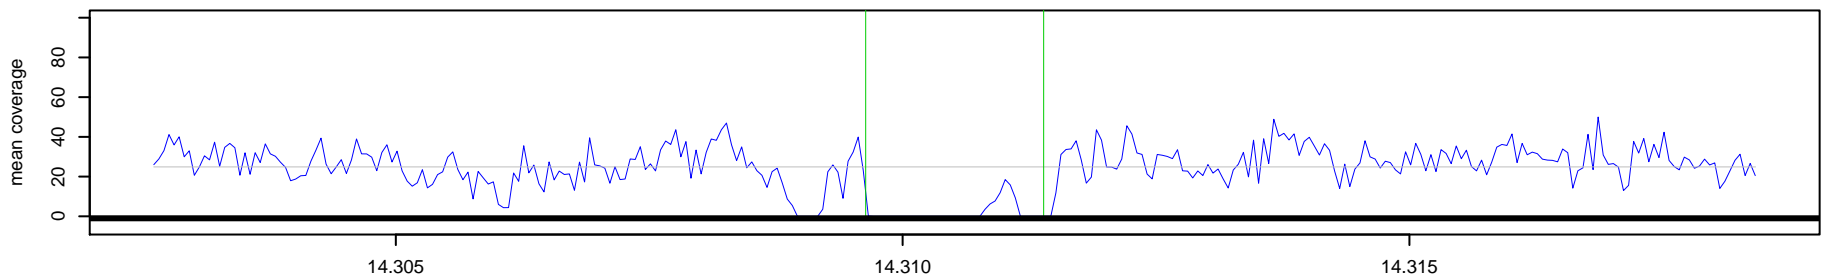

4\_NA10851 Chr 1 : 14309636 - 14311391 , 1756 bp (aCGH relative log2ratio= -1.72 )

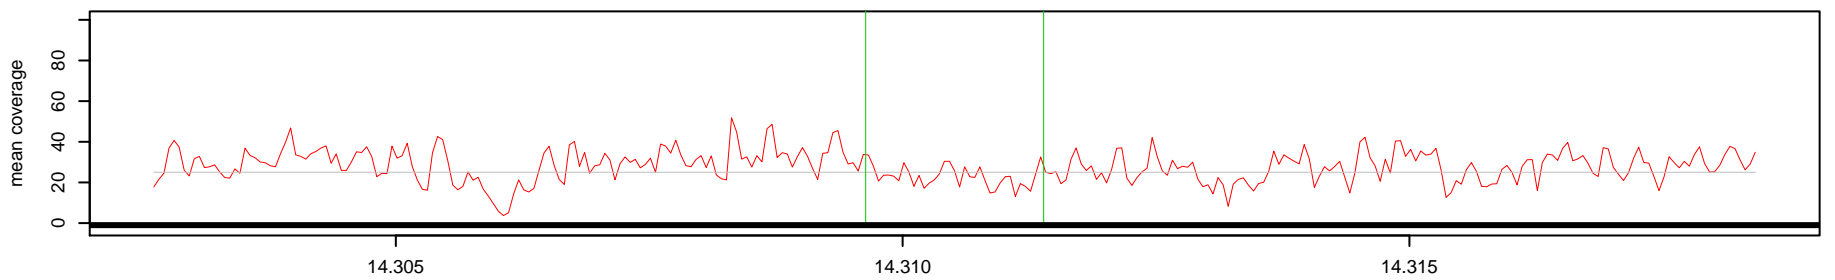

Log2( AK1 read depth / NA10851 read depth)

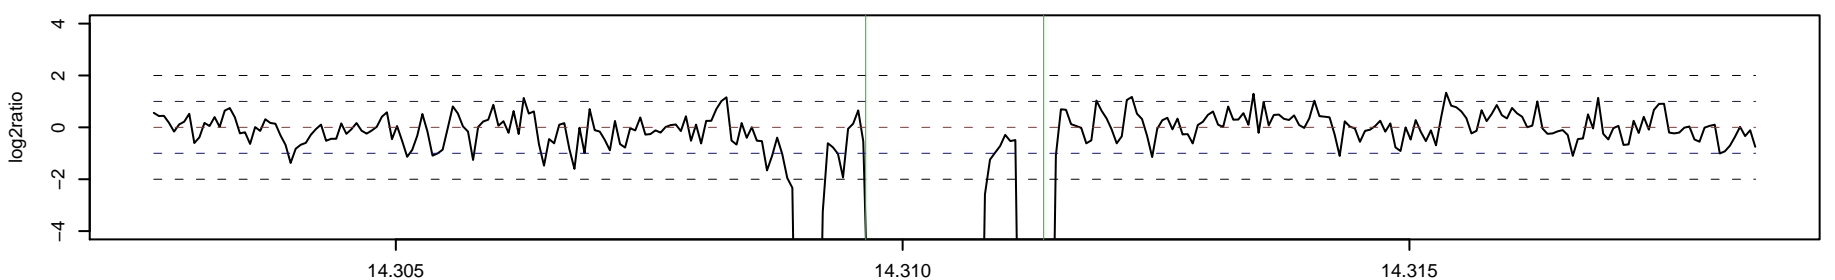

5\_AK1 Chr 1 : 25481836 – 25529749 , 47914 bp (aCGH relative log2ratio= 0.54 )

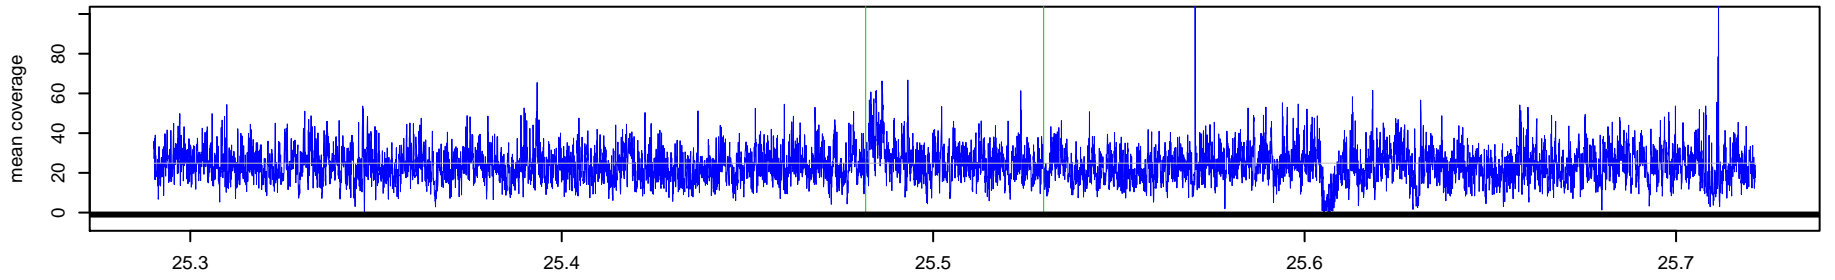

5\_NA10851 Chr 1 : 25481836 – 25529749 , 47914 bp (aCGH relative log2ratio= 0.54 )

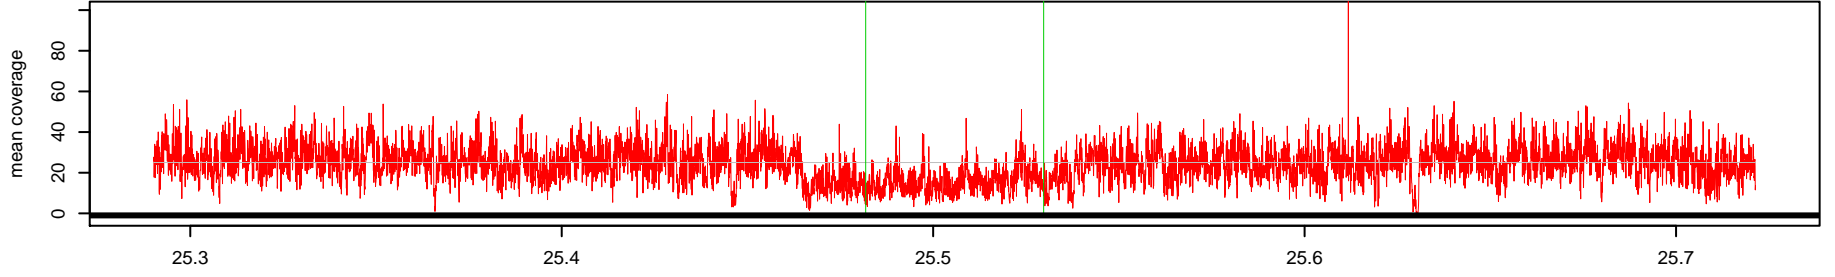

Log2( AK1 read depth / NA10851 read depth)

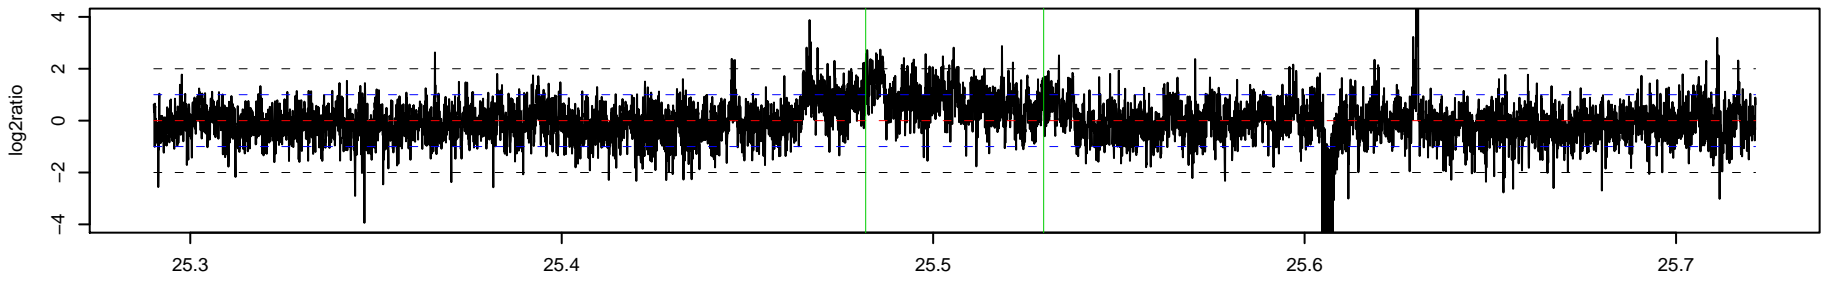

6\_AK1 Chr 1 : 32222562 – 32224153 , 1592 bp (aCGH relative log2ratio= -1.02 )

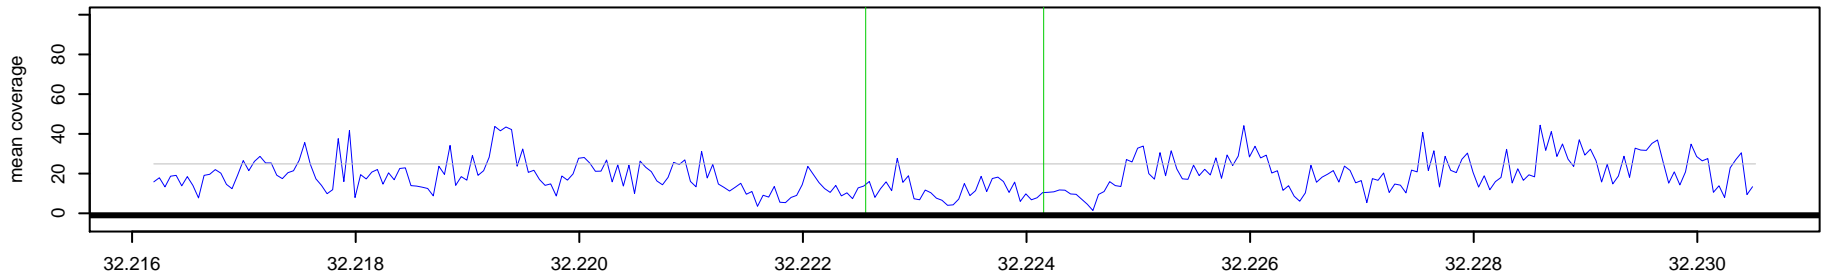

6\_NA10851 Chr 1 : 32222562 – 32224153 , 1592 bp (aCGH relative log2ratio= -1.02 )

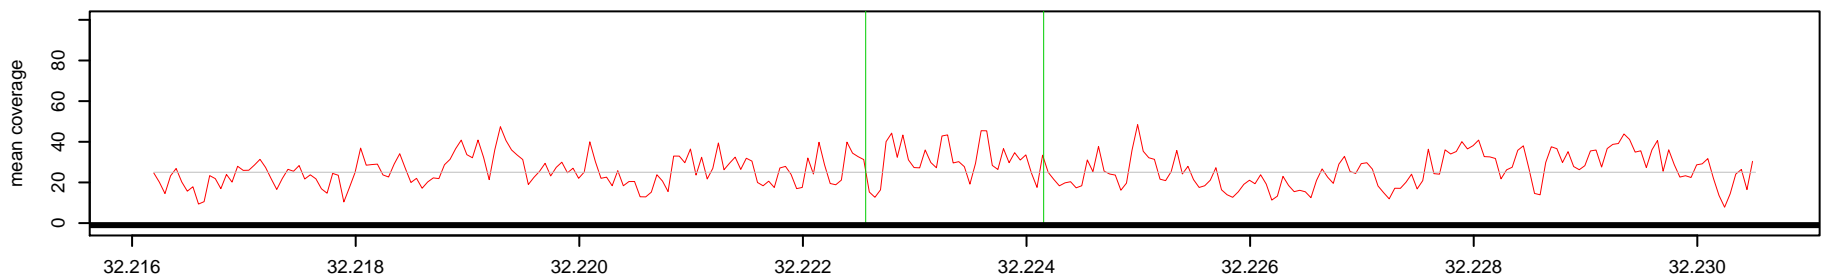

Log2( AK1 read depth / NA10851 read depth)

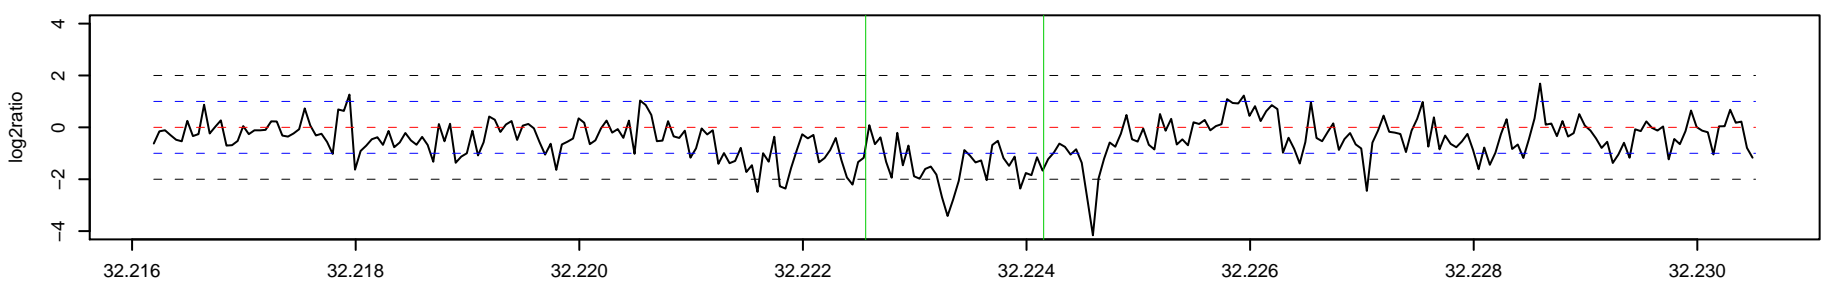

7\_AK1 Chr 1 : 38856775 - 38858166 , 1392 bp (aCGH relative log2ratio= -0.81 )

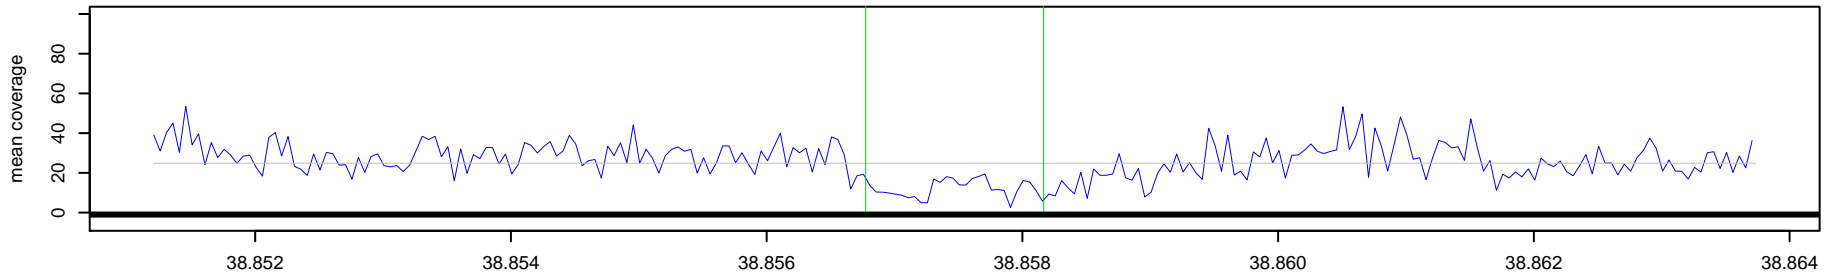

7\_NA10851 Chr 1 : 38856775 - 38858166 , 1392 bp (aCGH relative log2ratio= -0.81 )

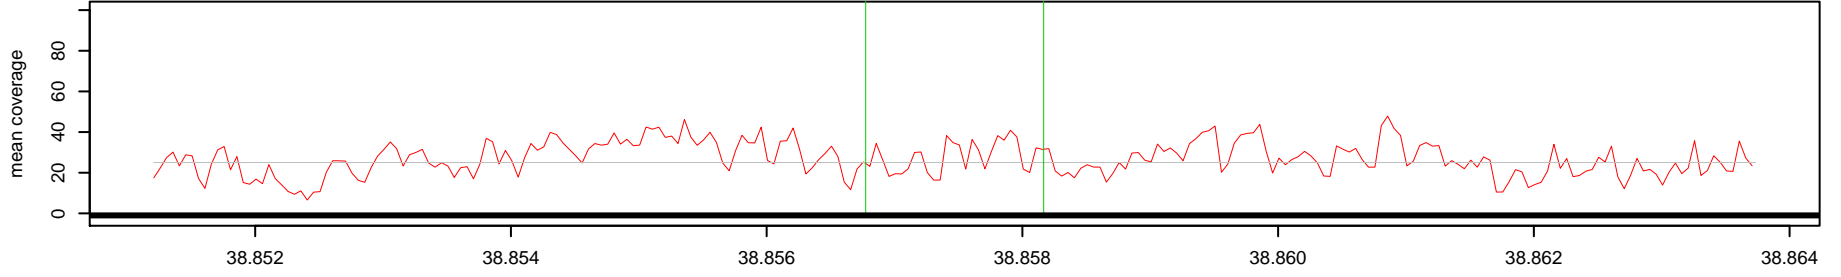

Log2( AK1 read depth / NA10851 read depth)

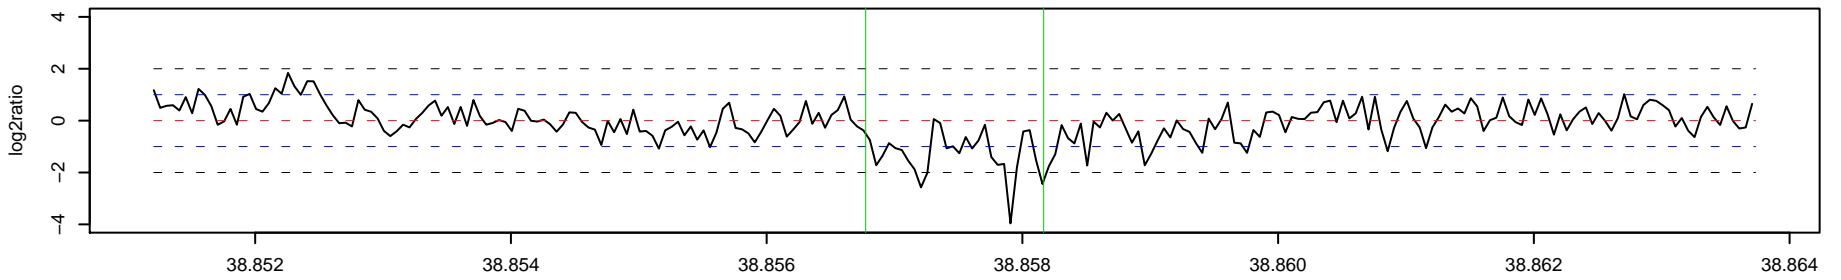

8\_AK1 Chr 1 : 40740783 - 40742603 , 1821 bp (aCGH relative log2ratio= -0.95 )

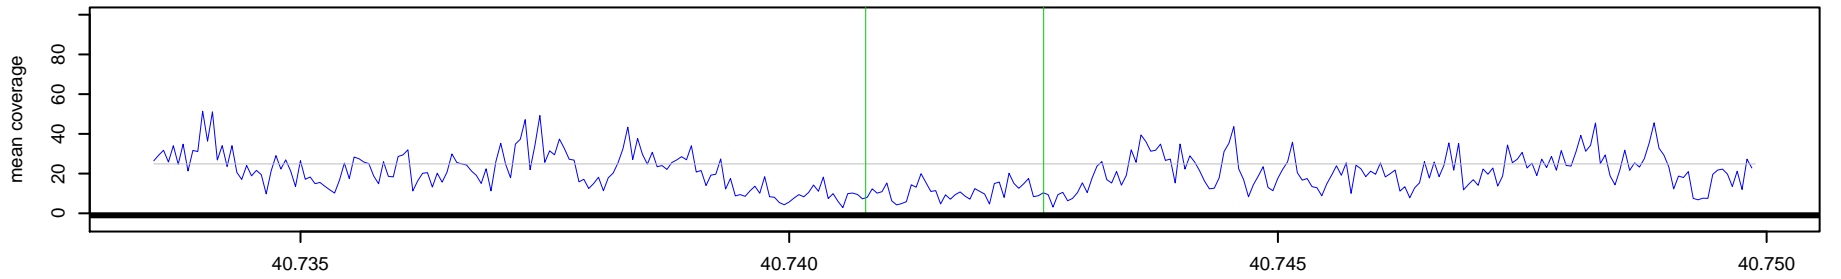

8\_NA10851 Chr 1 : 40740783 - 40742603 , 1821 bp (aCGH relative log2ratio= -0.95 )

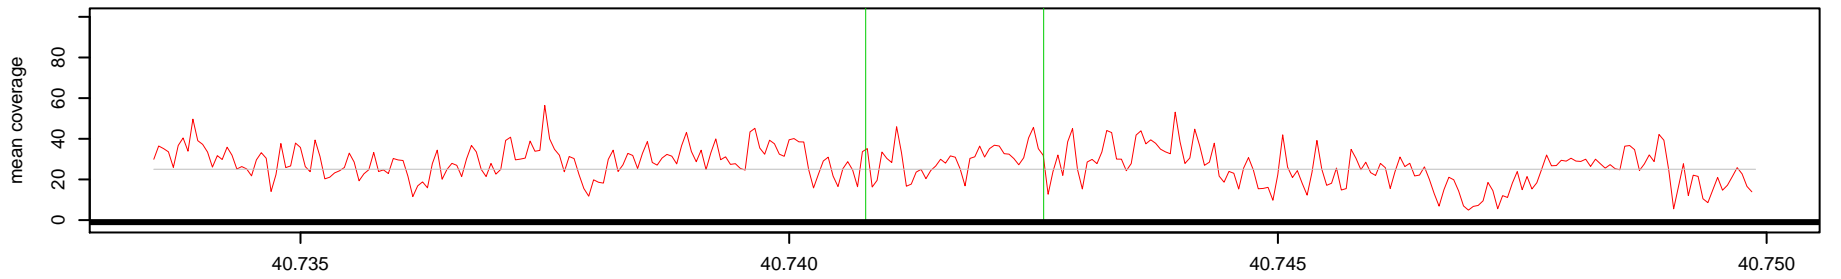

Log2( AK1 read depth / NA10851 read depth)

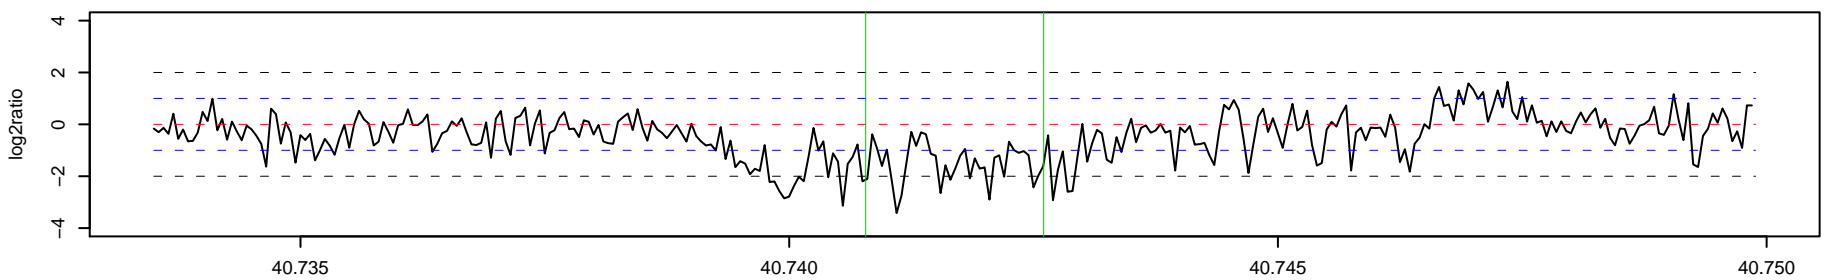



9\_AK1 Chr 1 : 54864767 – 54866063 , 1297 bp (aCGH relative log2ratio= 0.65 )

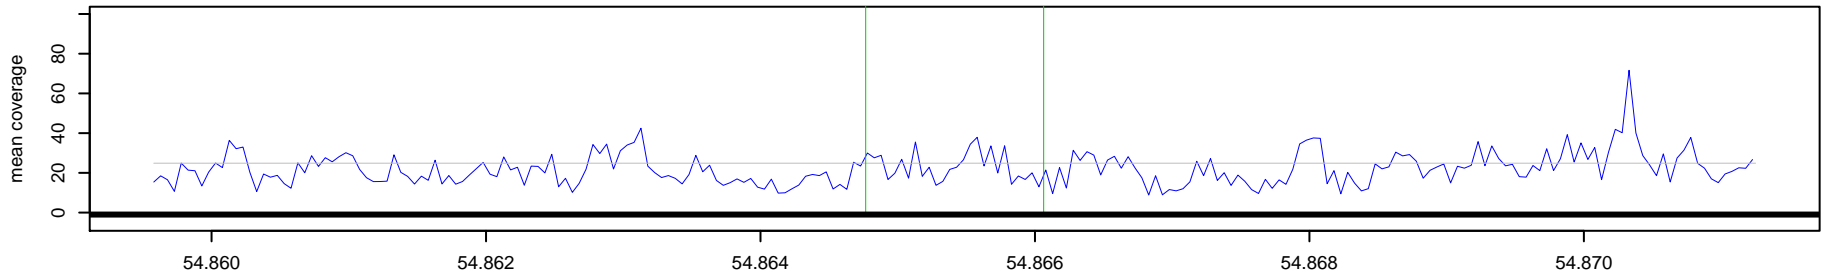

9\_NA10851 Chr 1 : 54864767 – 54866063 , 1297 bp (aCGH relative log2ratio= 0.65 )

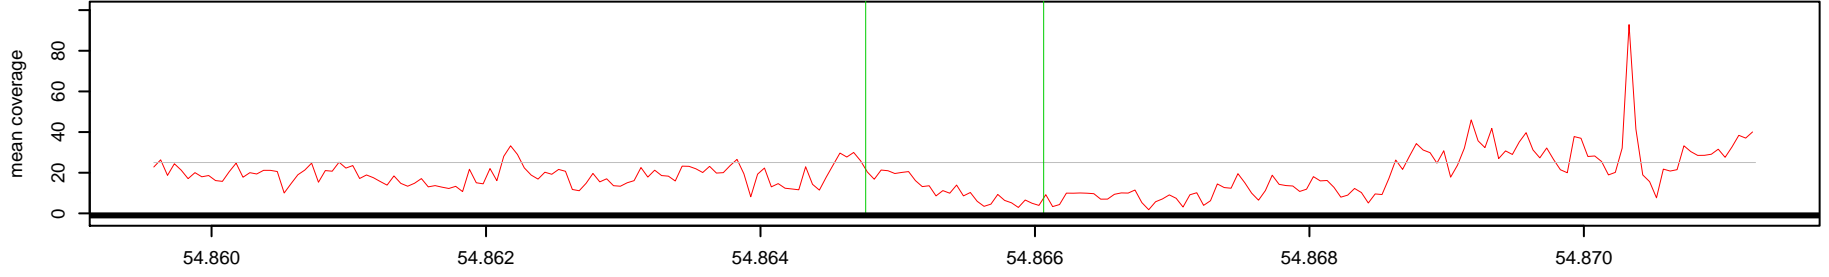

Log2( AK1 read depth / NA10851 read depth)

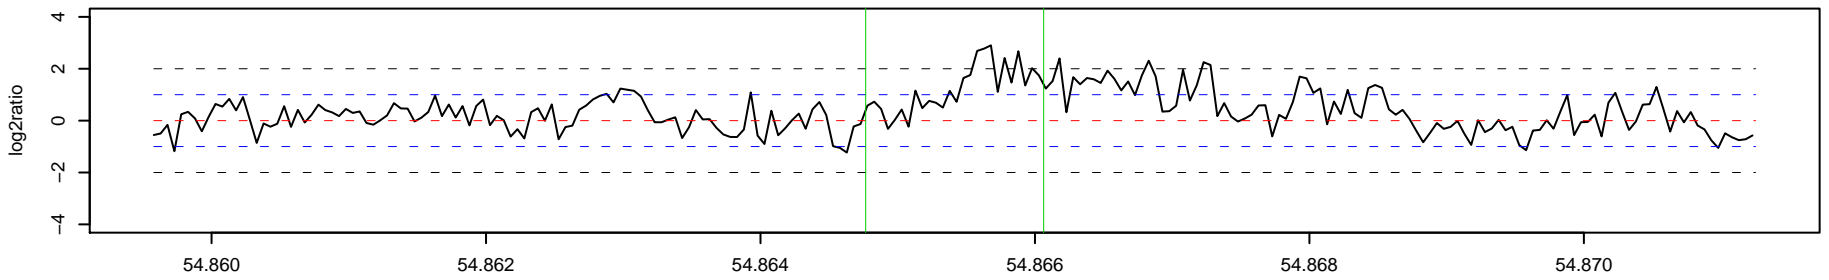

10\_AK1 Chr 1 : 58516576 – 58517352 , 777 bp (aCGH relative log2ratio= 1.64 )

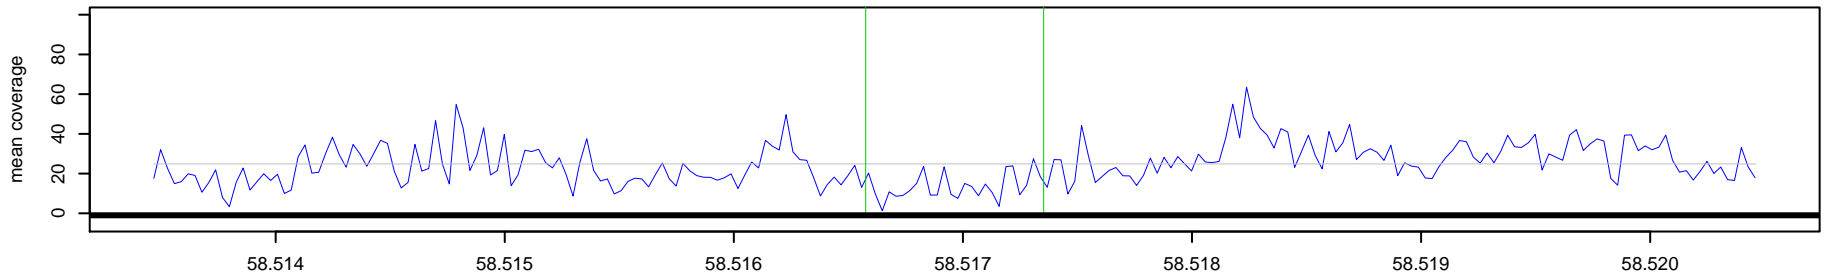

10\_NA10851 Chr 1 : 58516576 – 58517352 , 777 bp (aCGH relative log2ratio= 1.64 )

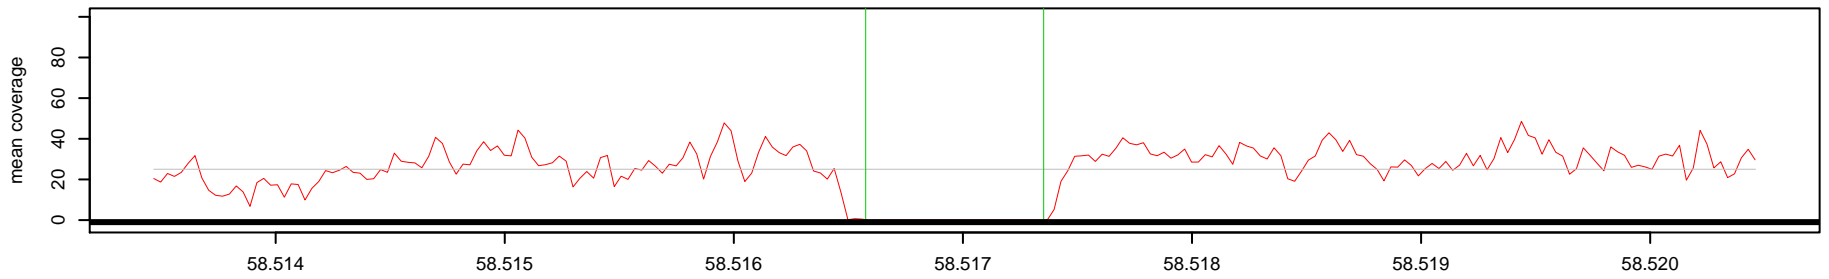

Log2( AK1 read depth / NA10851 read depth)

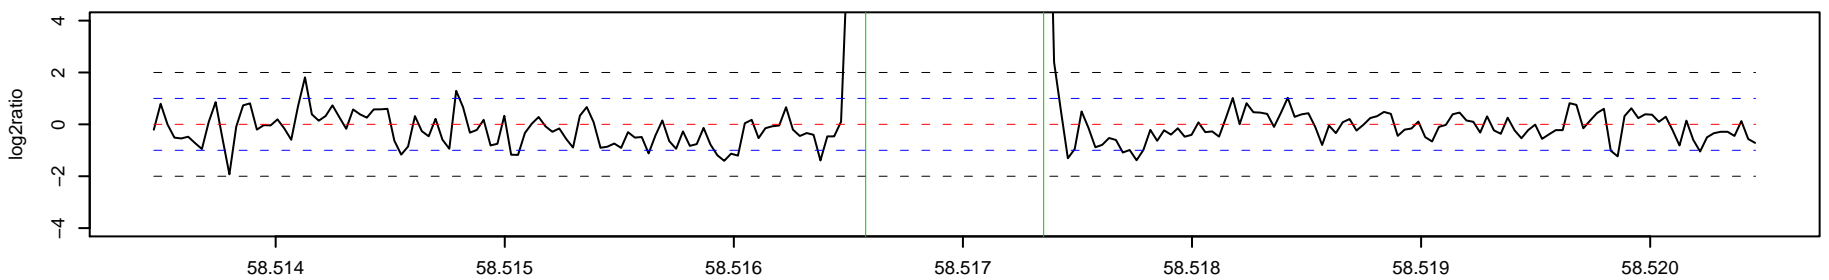

11\_AK1 Chr 1 : 59878829 – 59879738 , 910 bp (aCGH relative log2ratio= 0.77 )

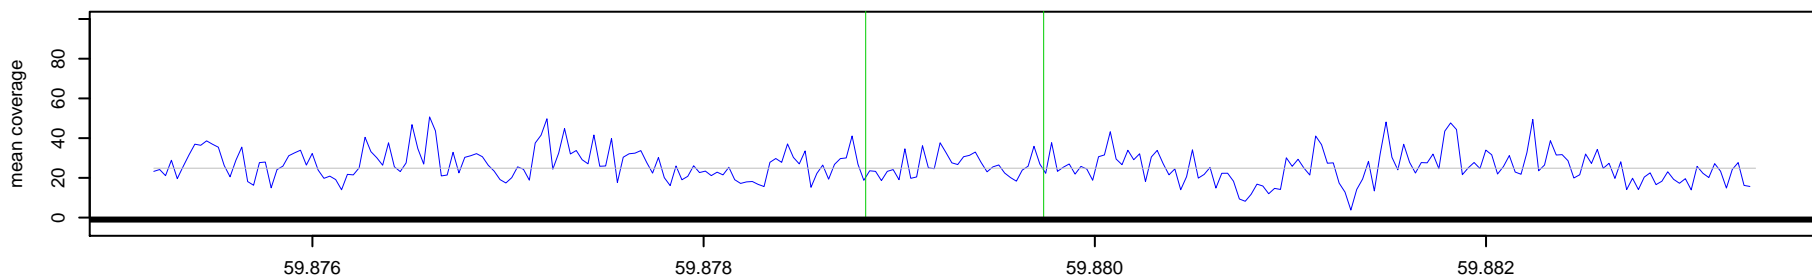

11\_NA10851 Chr 1 : 59878829 – 59879738 , 910 bp (aCGH relative log2ratio= 0.77 )

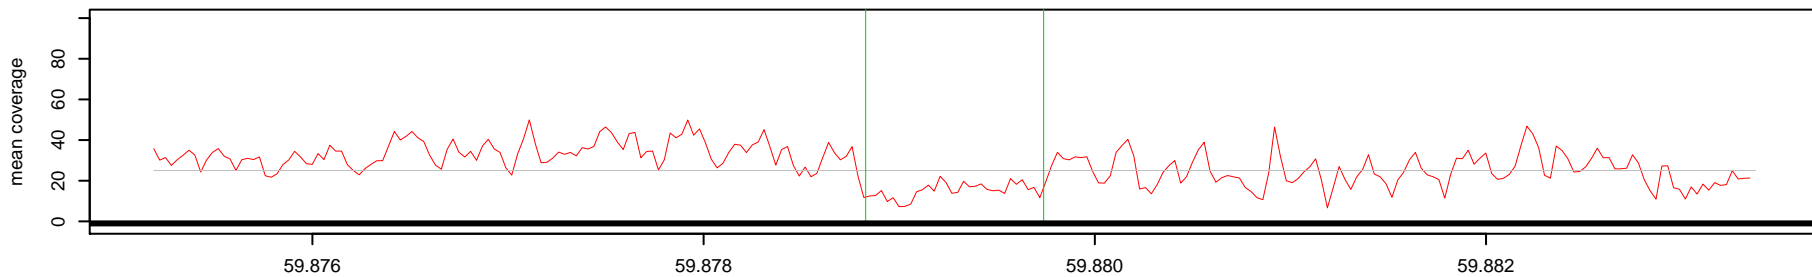

Log2( AK1 read depth / NA10851 read depth)

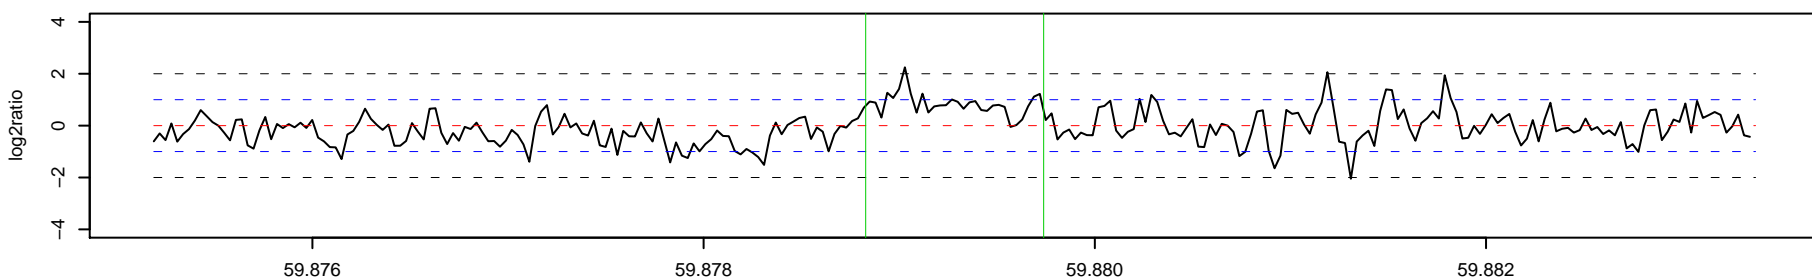

12\_AK1 Chr 1 : 61855664 – 61856456 , 793 bp (aCGH relative log2ratio= 0.53 )

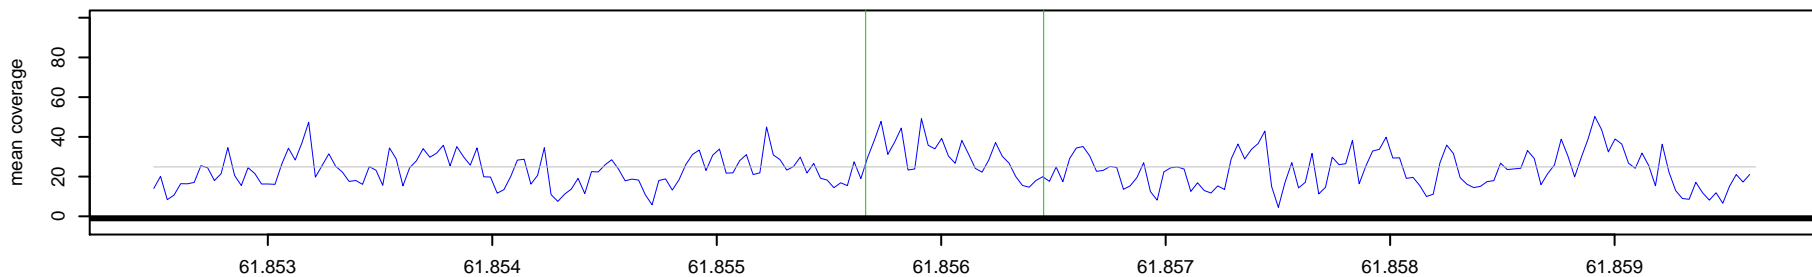

12\_NA10851 Chr 1 : 61855664 – 61856456 , 793 bp (aCGH relative log2ratio= 0.53 )

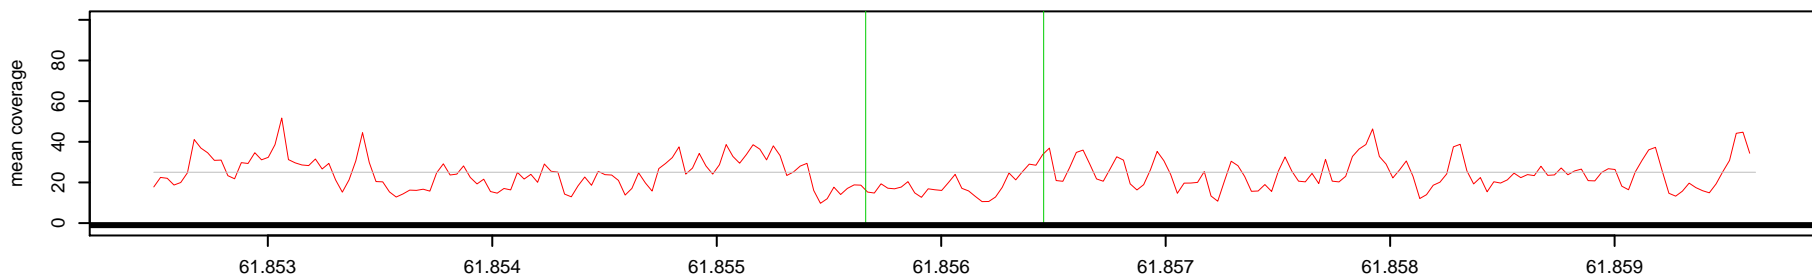

Log2( AK1 read depth / NA10851 read depth)

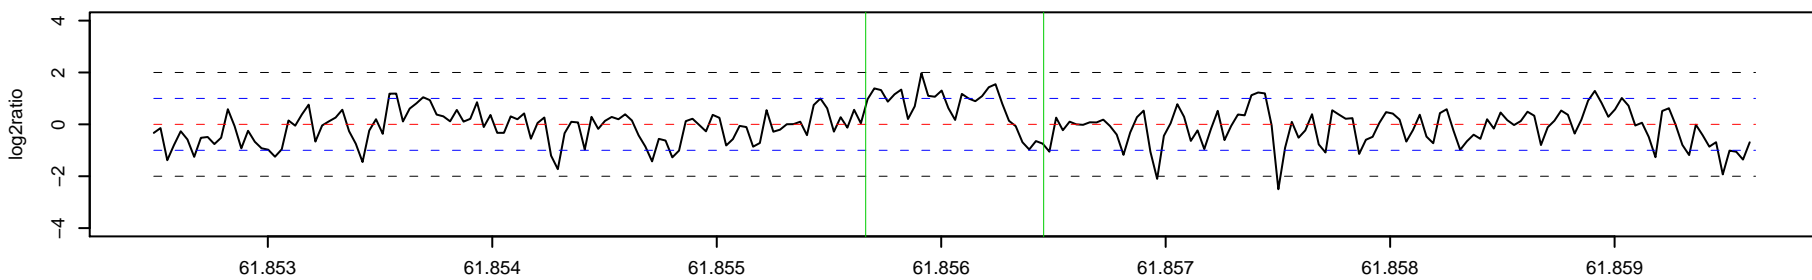

13\_AK1 Chr 1 : 61886152 – 61892084 , 5933 bp (aCGH relative log2ratio= -0.99 )

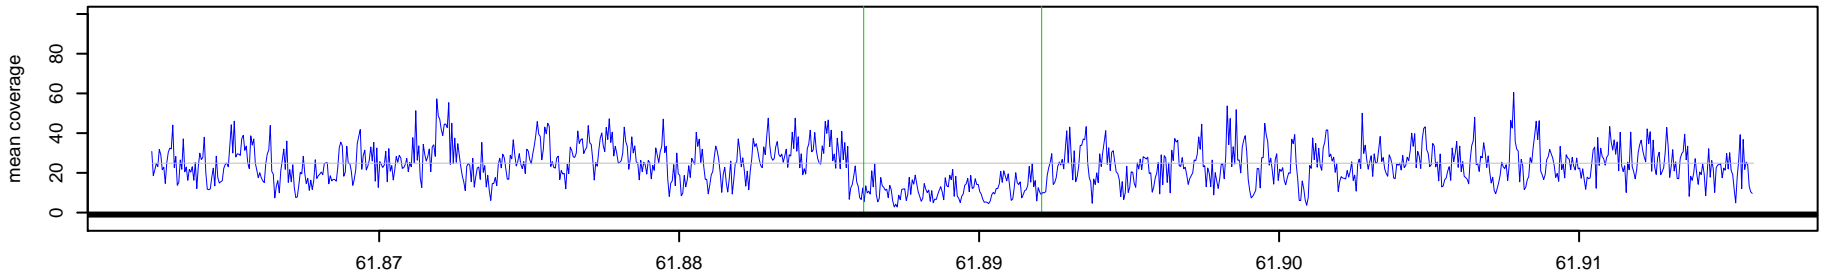

13\_NA10851 Chr 1 : 61886152 – 61892084 , 5933 bp (aCGH relative log2ratio= -0.99 )

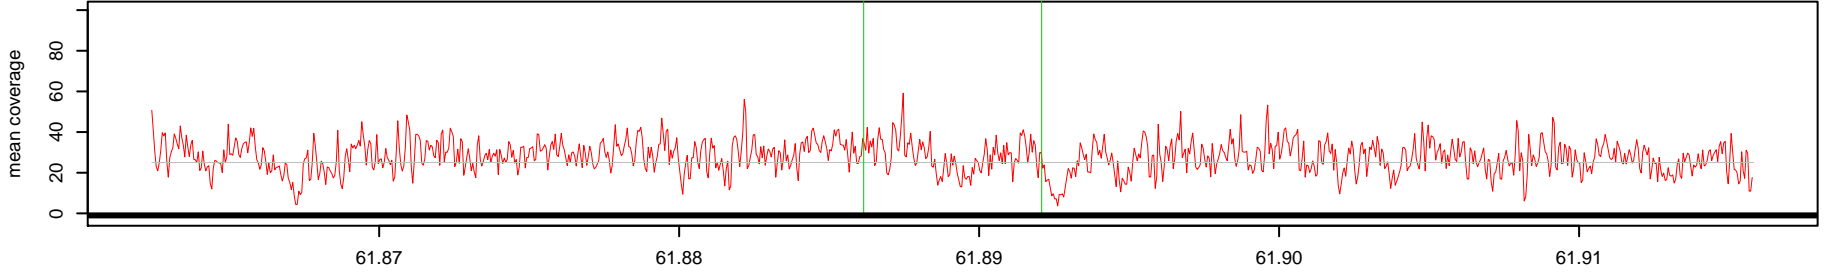

Log2( AK1 read depth / NA10851 read depth)

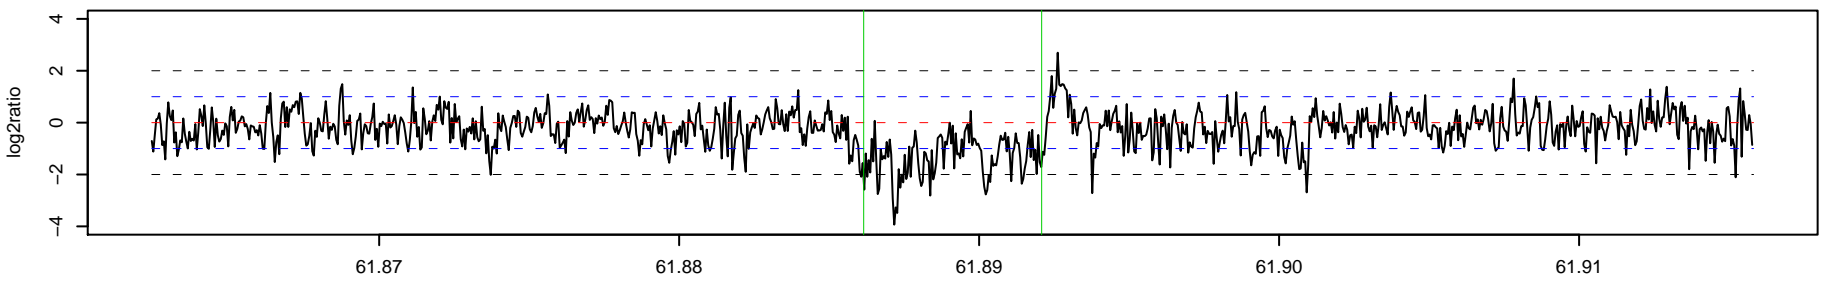

14\_AK1 Chr 1 : 62427253 – 62429655 , 2403 bp (aCGH relative log2ratio= 0.78 )

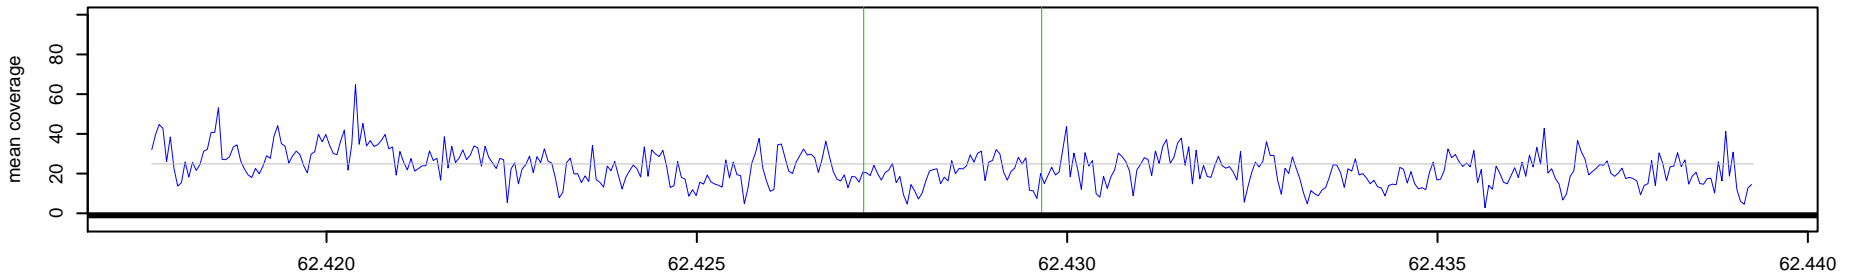

14\_NA10851 Chr 1 : 62427253 – 62429655 , 2403 bp (aCGH relative log2ratio= 0.78 )

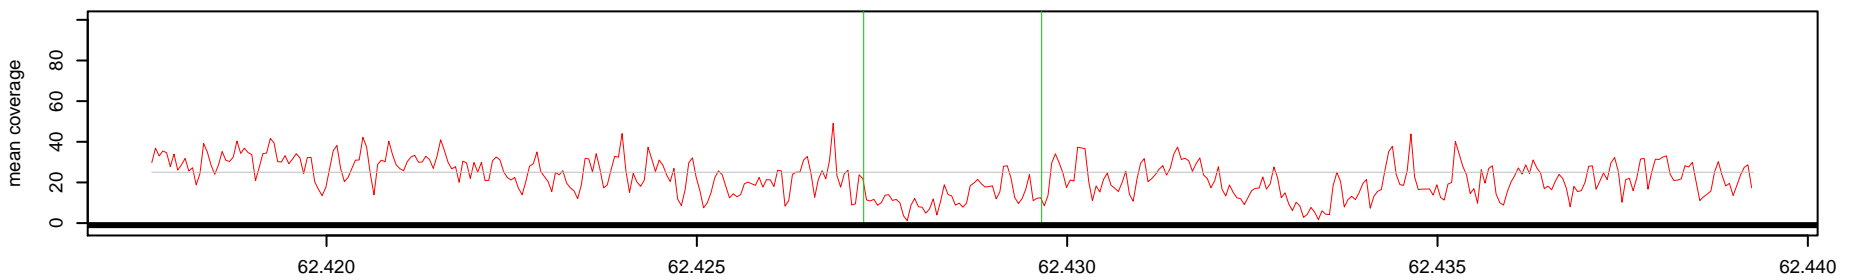

Log2( AK1 read depth / NA10851 read depth)

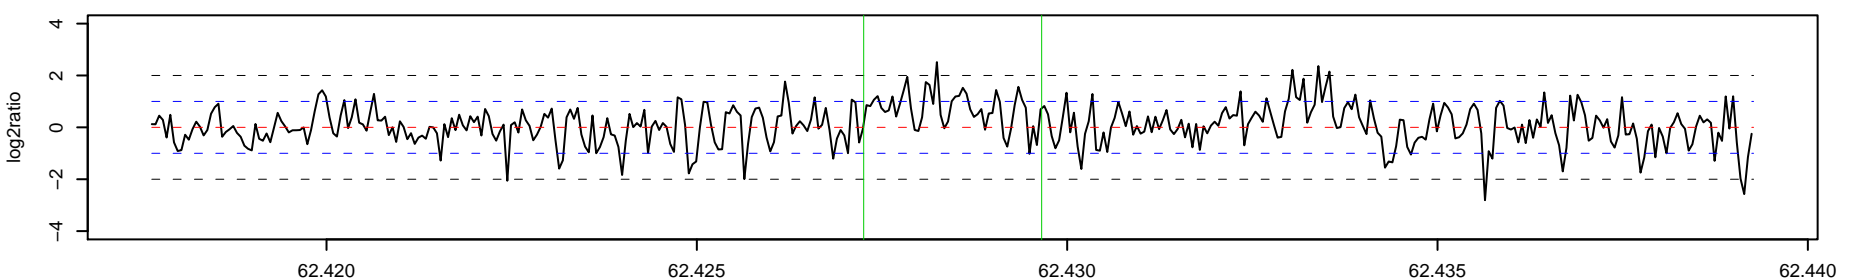

15\_AK1 Chr 1 : 72222105 – 72222572 , 468 bp (aCGH relative log2ratio= 0.78 )

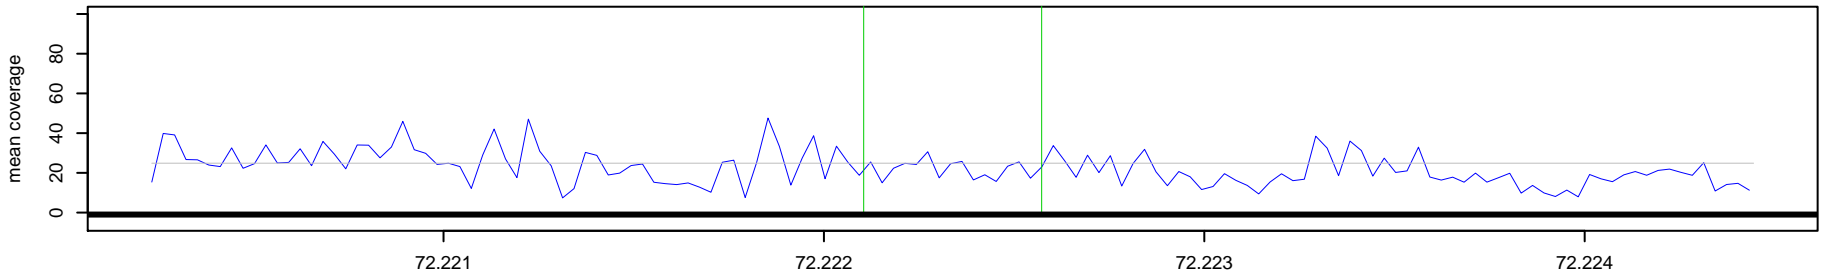

15\_NA10851 Chr 1 : 72222105 – 72222572 , 468 bp (aCGH relative log2ratio= 0.78 )

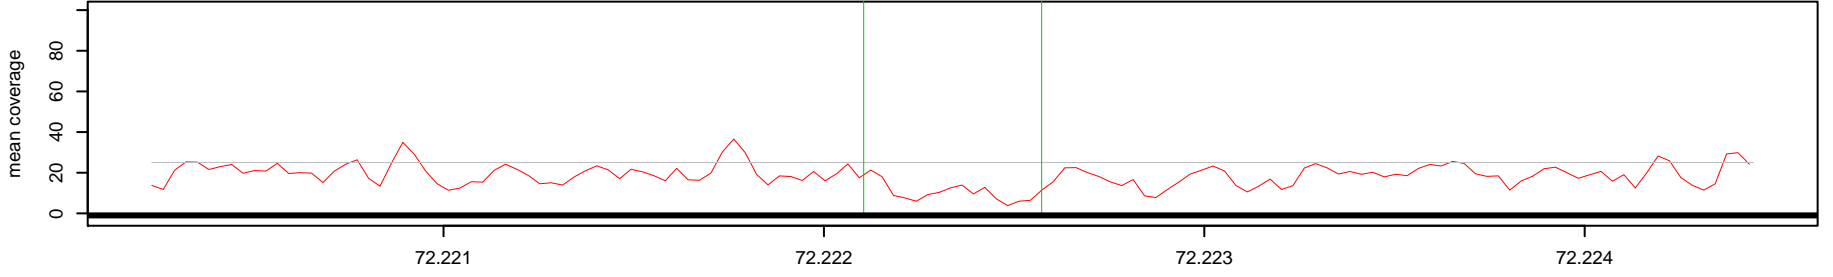

Log2( AK1 read depth / NA10851 read depth)

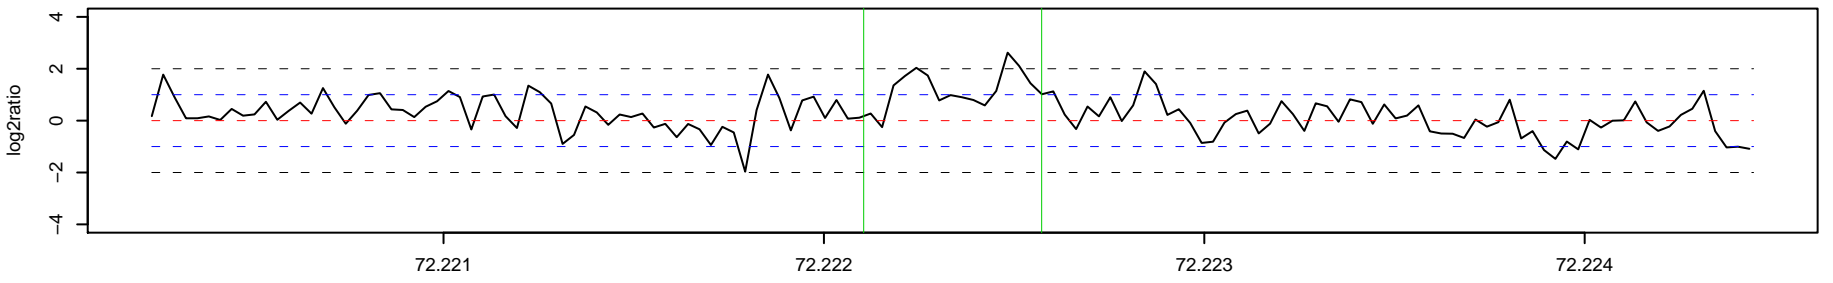

16\_AK1 Chr 1 : 72381869 – 72382343 , 475 bp (aCGH relative log2ratio= 0.62 )

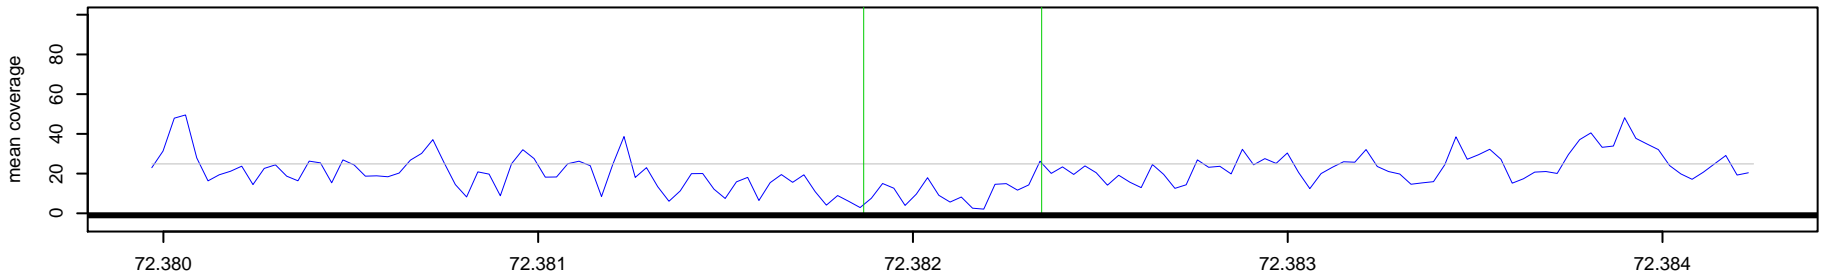

16\_NA10851 Chr 1 : 72381869 – 72382343 , 475 bp (aCGH relative log2ratio= 0.62 )

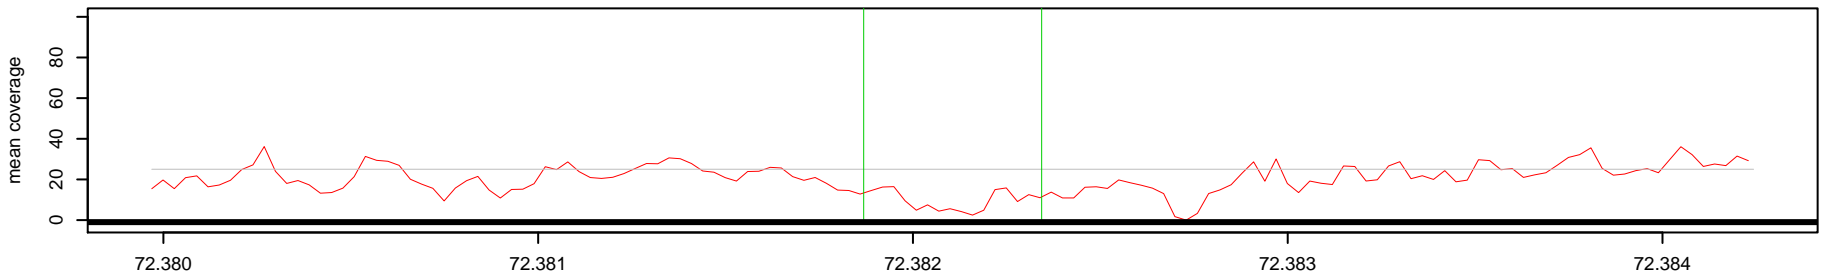

Log2( AK1 read depth / NA10851 read depth)

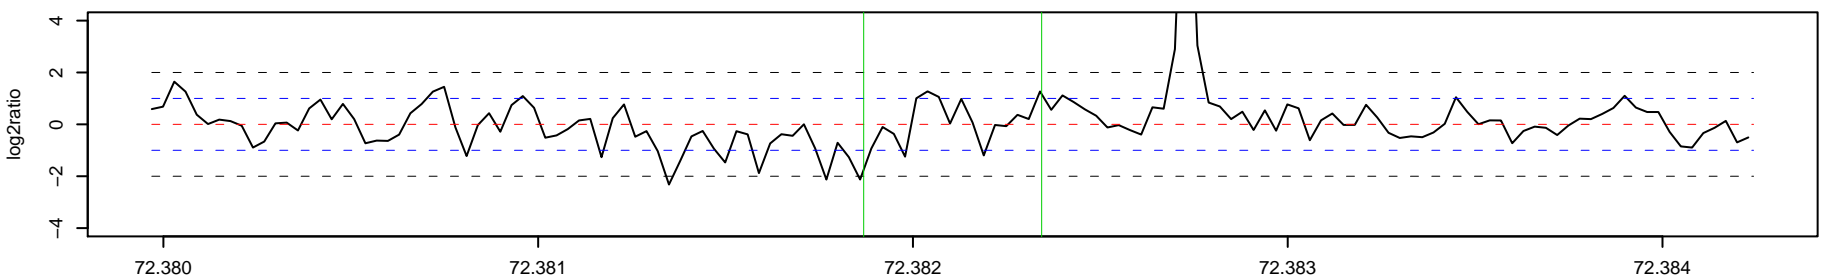

17\_AK1 Chr 1 : 72538854 – 72584439 , 45586 bp (aCGH relative log2ratio= -2.79 )

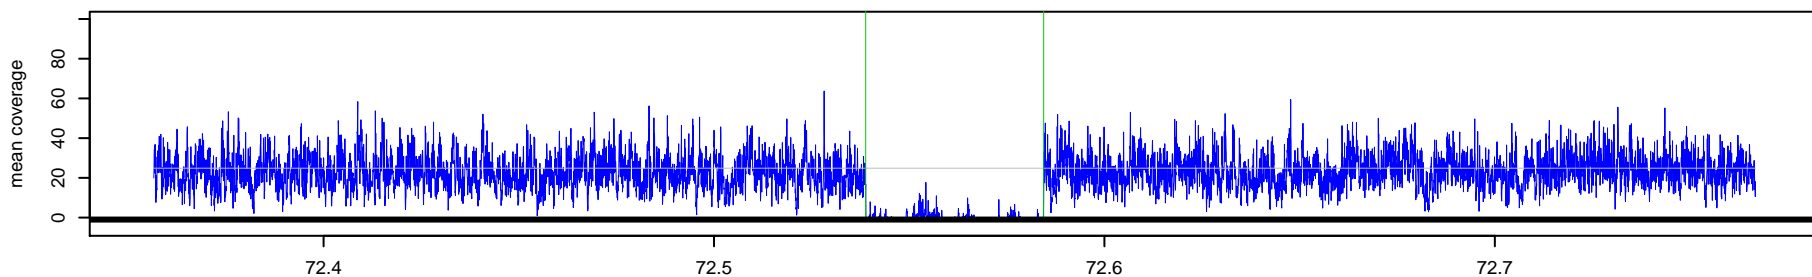

17\_NA10851 Chr 1 : 72538854 – 72584439 , 45586 bp (aCGH relative log2ratio= -2.79 )

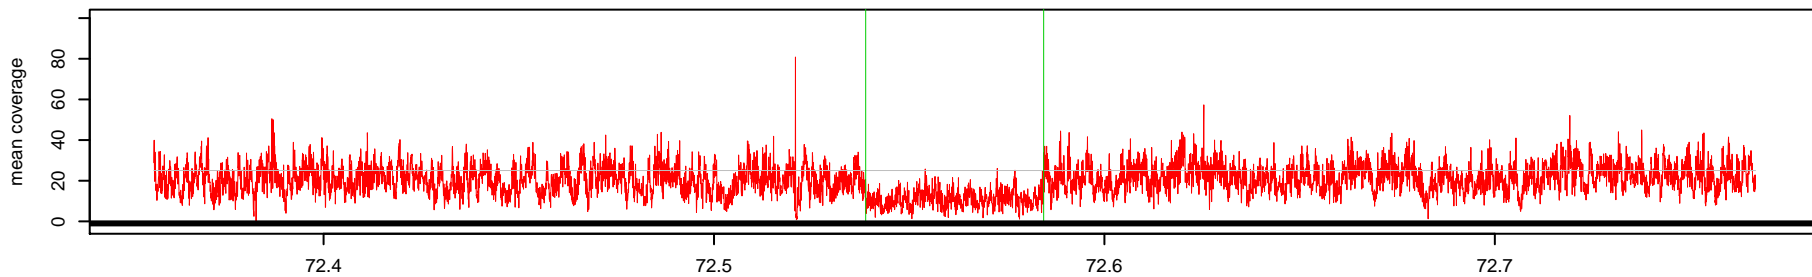

Log2( AK1 read depth / NA10851 read depth)

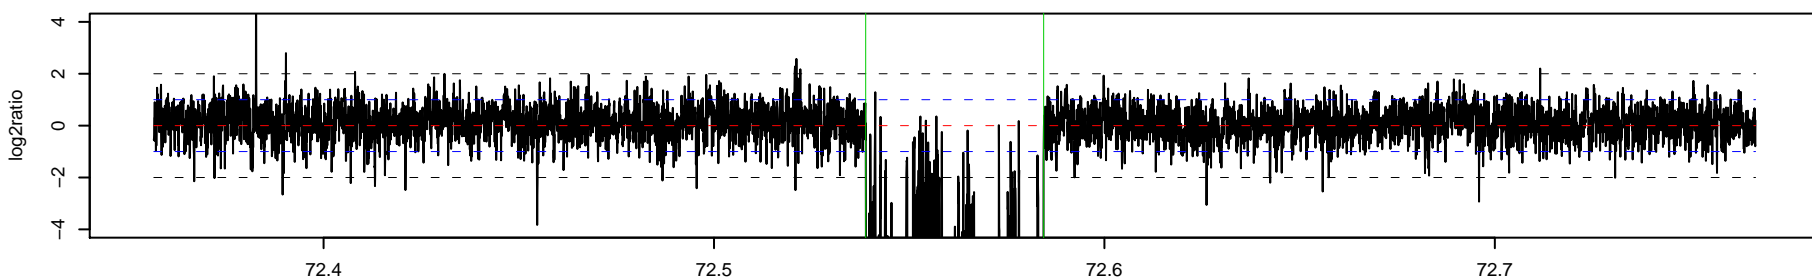

18\_AK1 Chr 1 : 78422267 – 78424372 , 2106 bp (aCGH relative log2ratio= -0.89 )

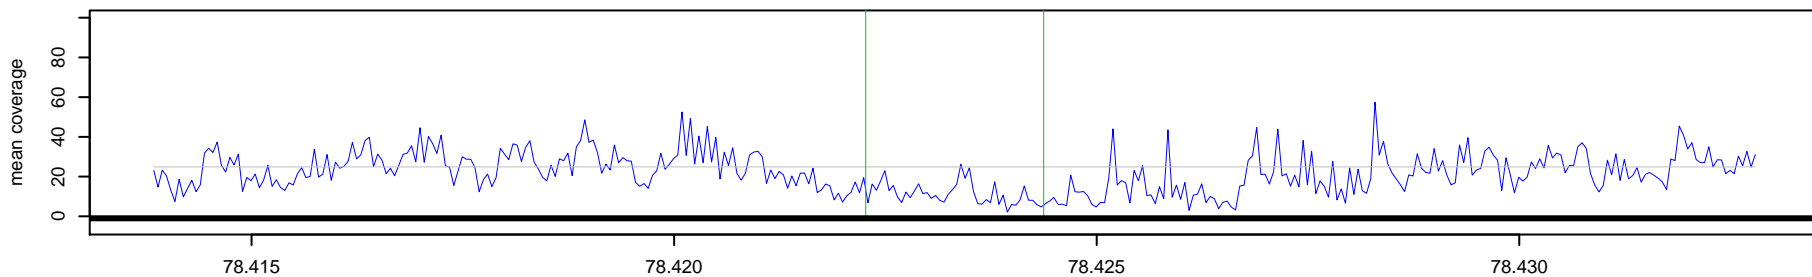

18\_NA10851 Chr 1 : 78422267 – 78424372 , 2106 bp (aCGH relative log2ratio= -0.89 )

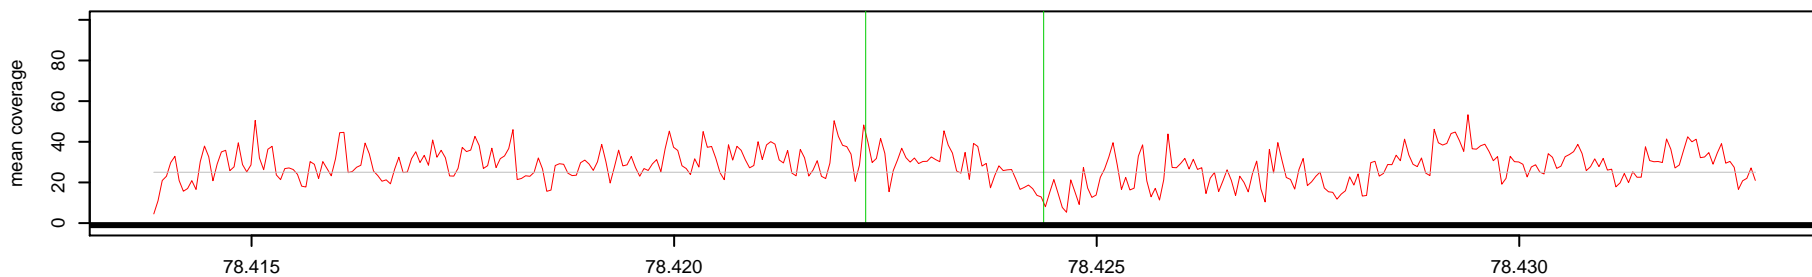

Log2( AK1 read depth / NA10851 read depth)

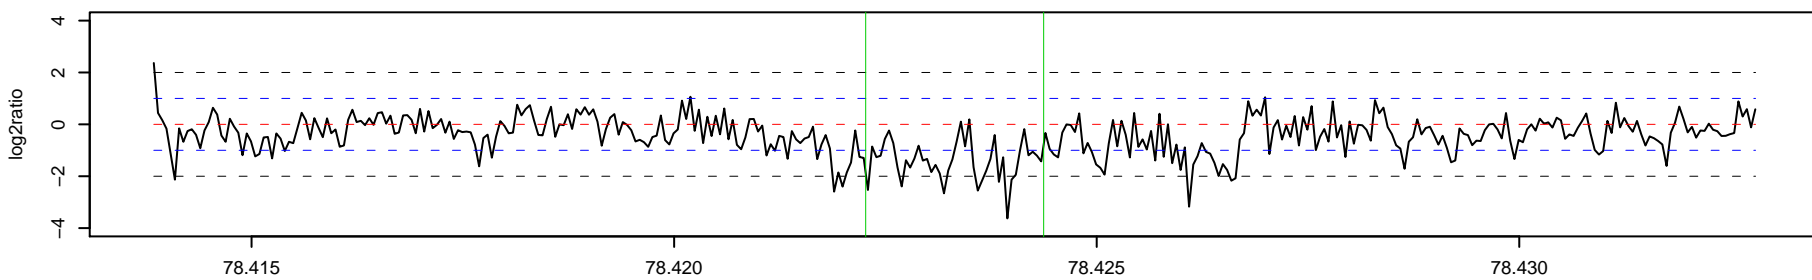

19\_AK1 Chr 1 : 84484719 – 84488478 , 3760 bp (aCGH relative log2ratio= -0.95 )

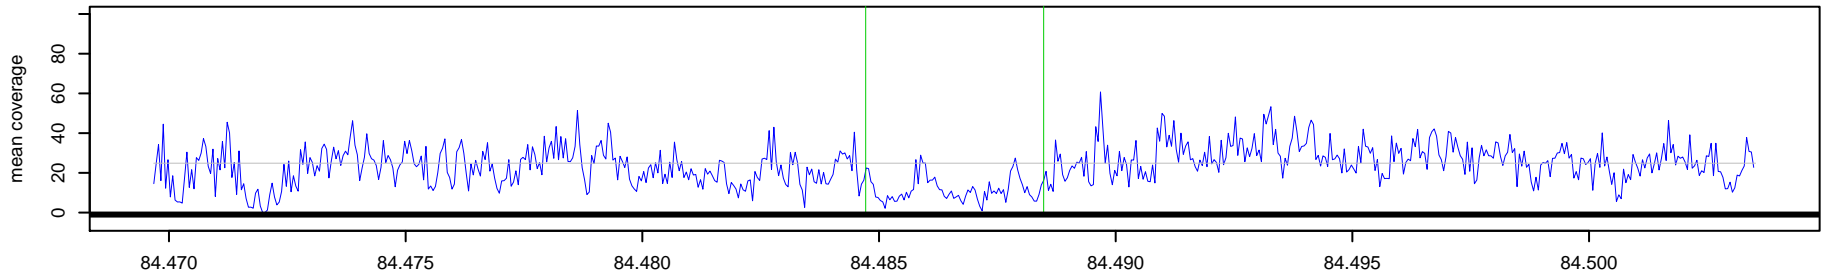

19\_NA10851 Chr 1 : 84484719 – 84488478 , 3760 bp (aCGH relative log2ratio= -0.95 )

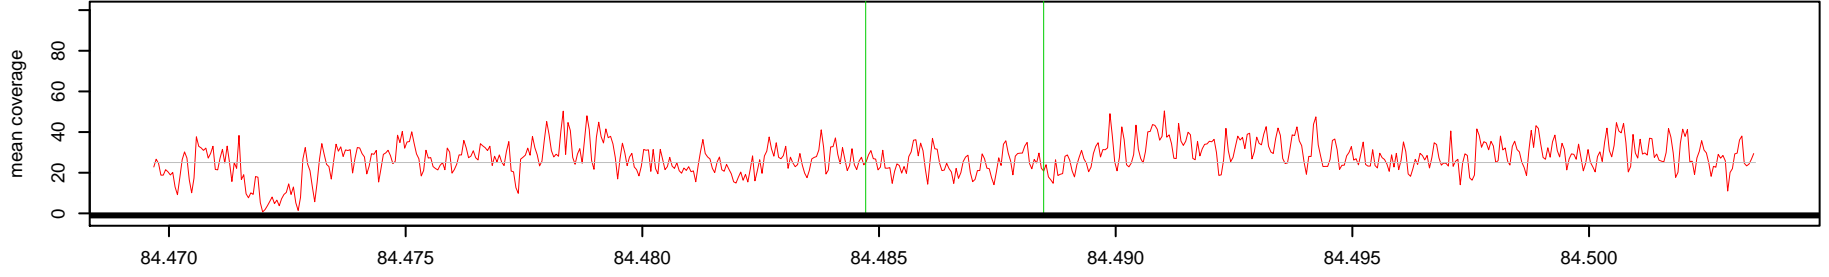

Log2( AK1 read depth / NA10851 read depth)

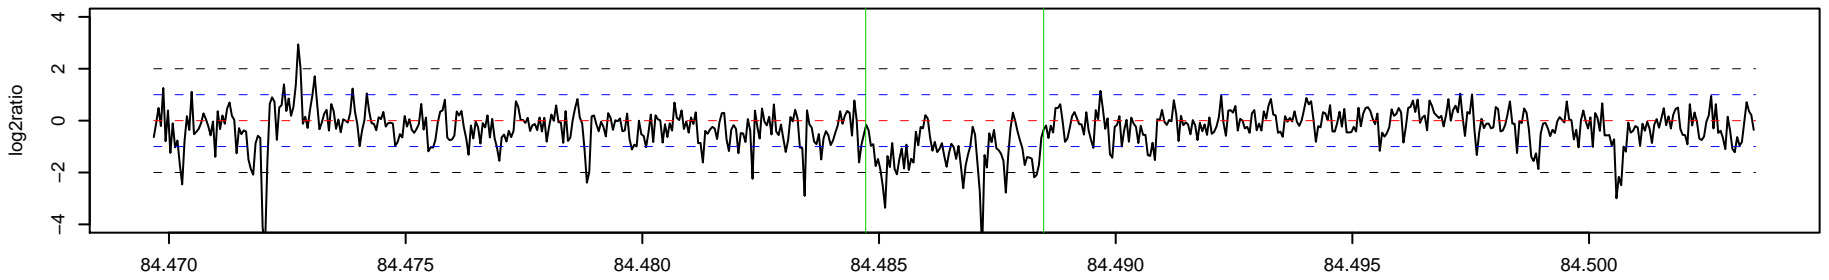

20\_AK1 Chr 1 : 86173442 – 86177089 , 3648 bp (aCGH relative log2ratio= -0.89 )

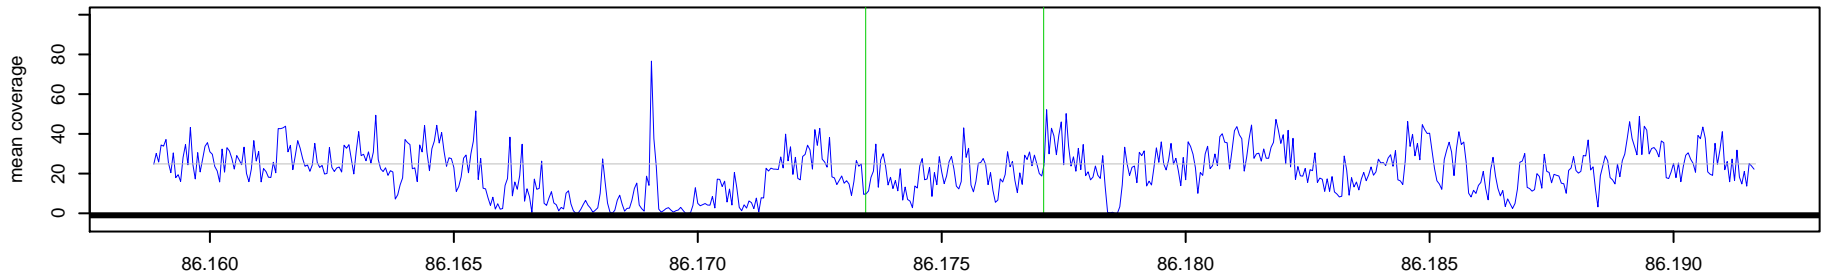

20\_NA10851 Chr 1 : 86173442 – 86177089 , 3648 bp (aCGH relative log2ratio= -0.89 )

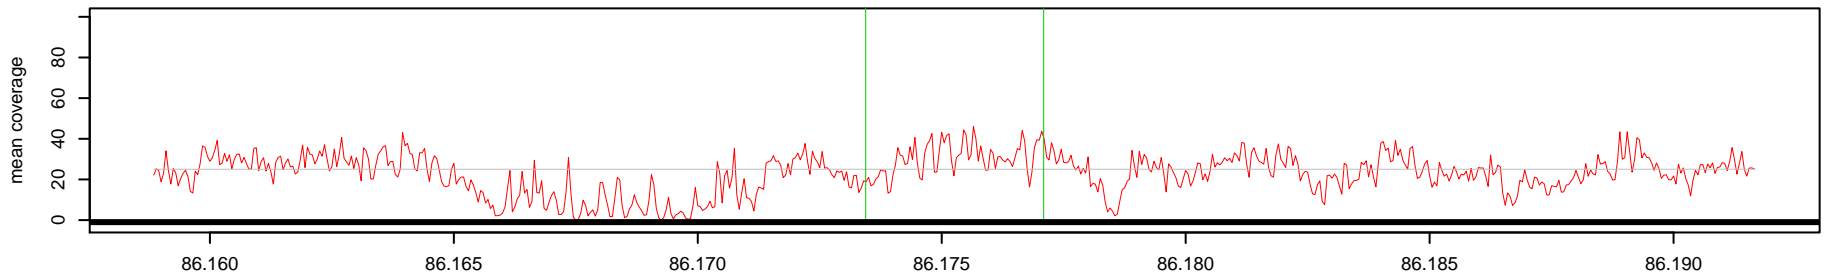

Log2( AK1 read depth / NA10851 read depth)

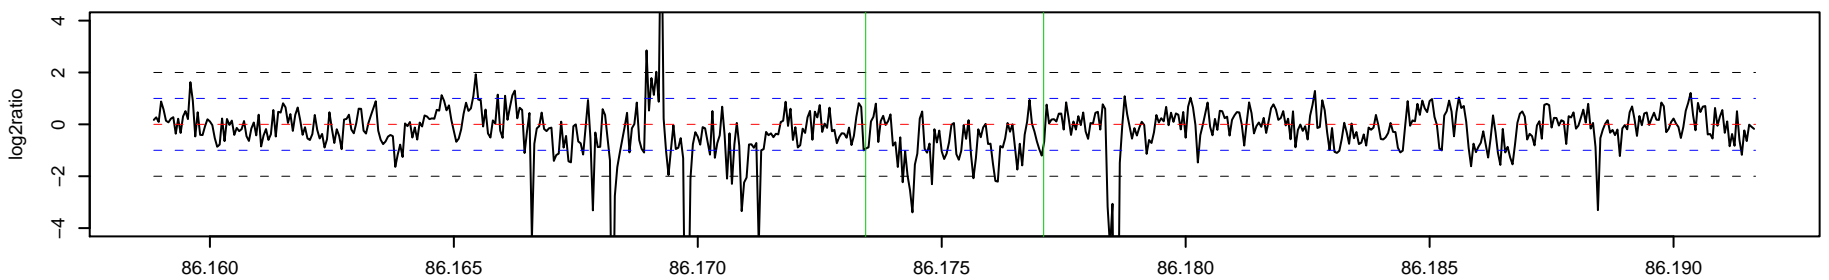

21\_AK1 Chr 1 : 89248781 – 89251213 , 2433 bp (aCGH relative log2ratio= 1.85 )

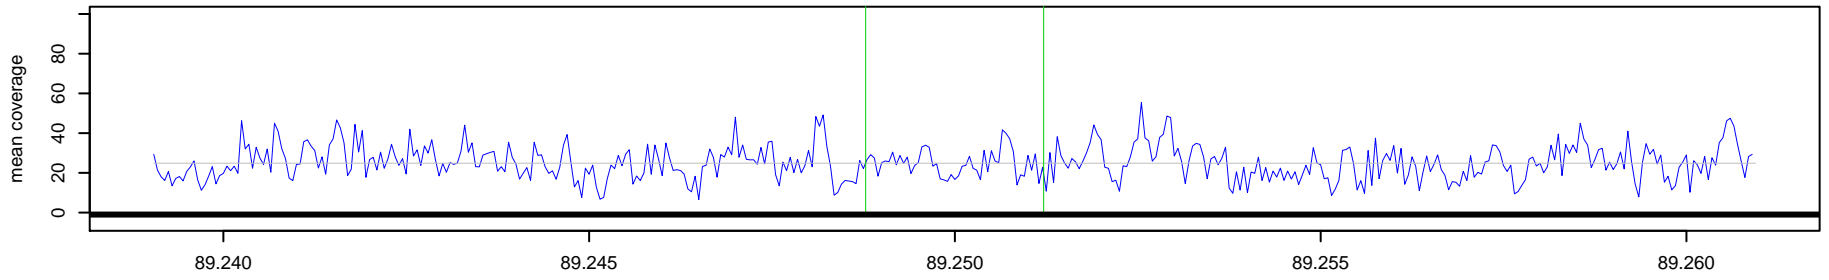

21\_NA10851 Chr 1 : 89248781 – 89251213 , 2433 bp (aCGH relative log2ratio= 1.85 )

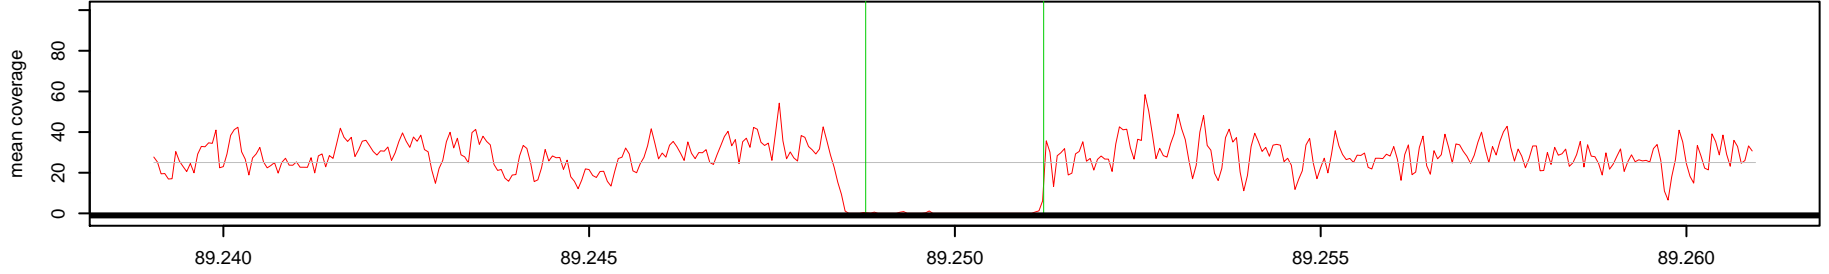

Log2( AK1 read depth / NA10851 read depth)

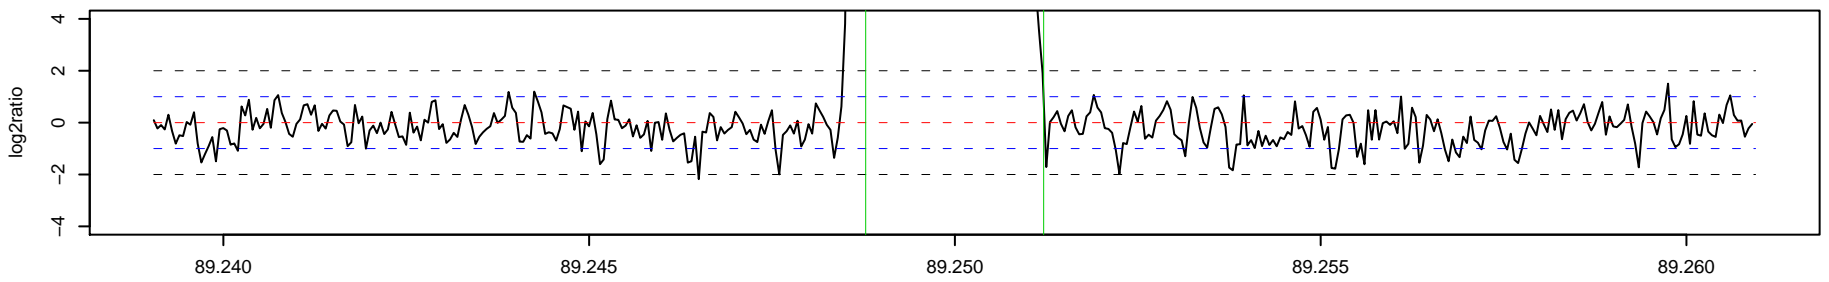

22\_AK1 Chr 1 : 104244674 – 104245169 , 496 bp (aCGH relative log2ratio= 3.68 )

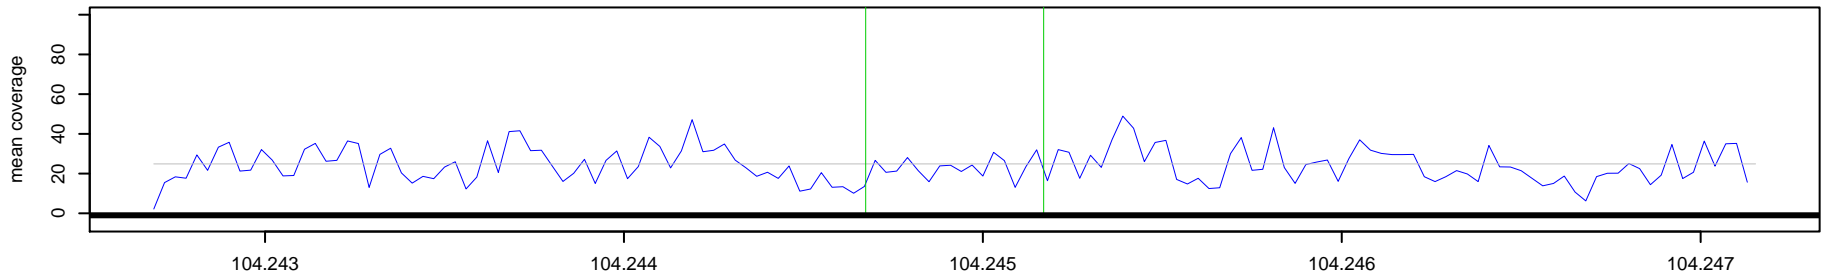

22\_NA10851 Chr 1 : 104244674 – 104245169 , 496 bp (aCGH relative log2ratio= 3.68 )

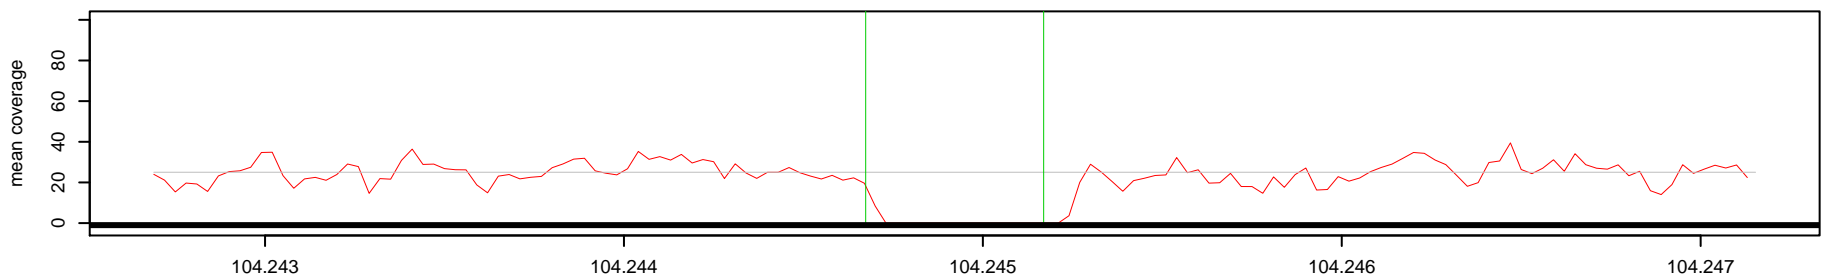

Log2( AK1 read depth / NA10851 read depth)

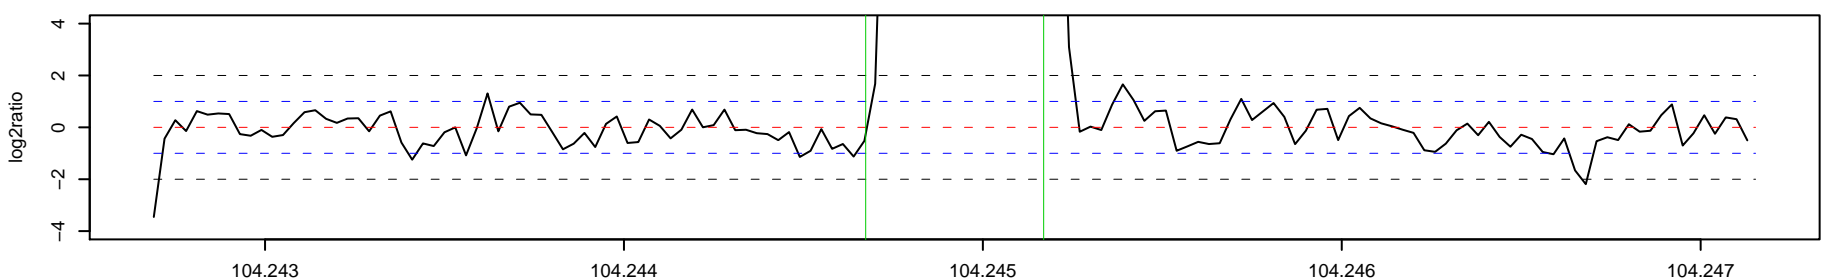

23\_AK1 Chr 1 : 105056655 – 105057726 , 1072 bp (aCGH relative log2ratio= -0.98 )

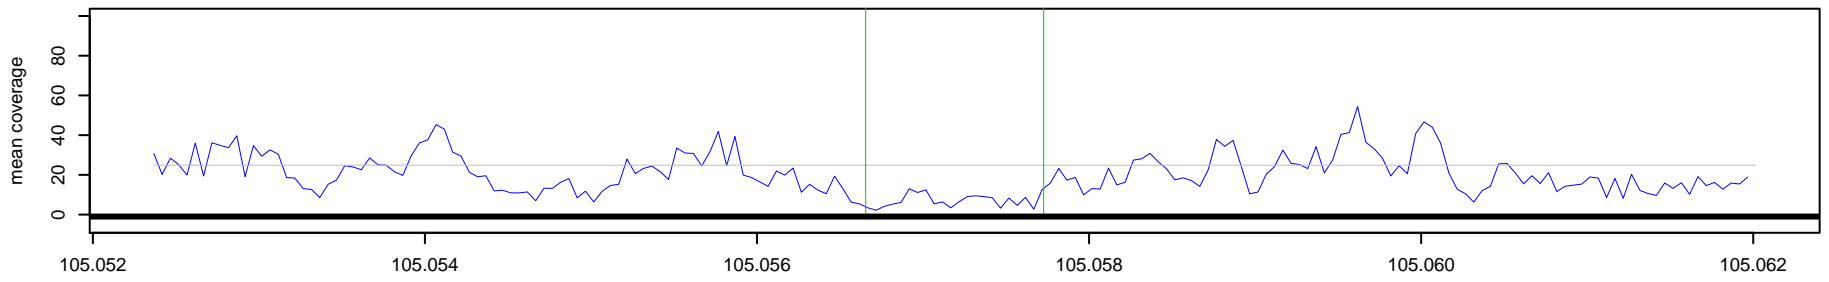

23\_NA10851 Chr 1 : 105056655 – 105057726 , 1072 bp (aCGH relative log2ratio= -0.98 )

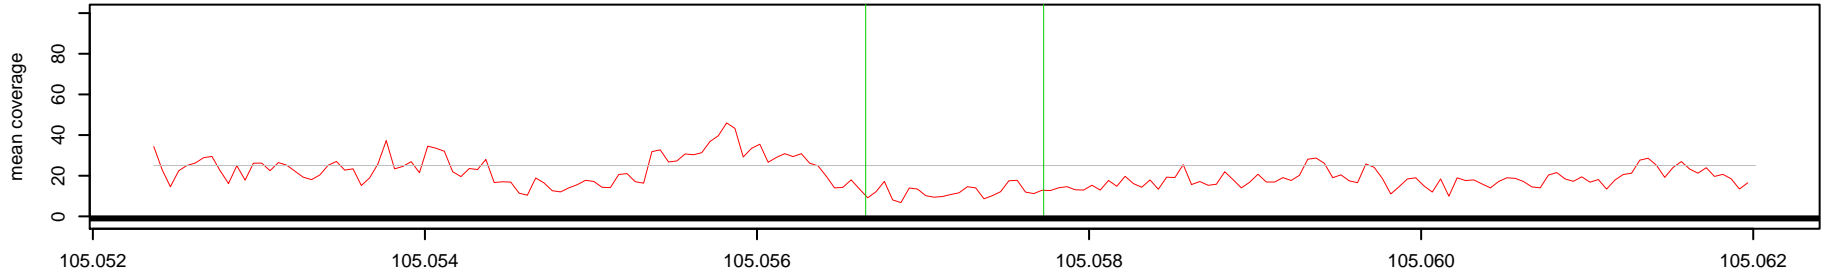

Log2( AK1 read depth / NA10851 read depth)

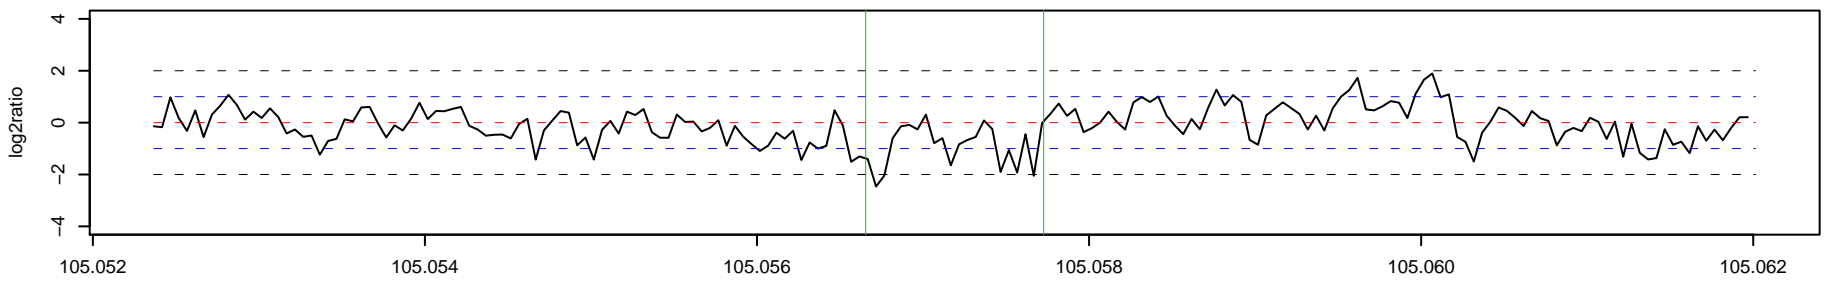

24\_AK1 Chr 1 : 105636794 – 105646993 , 10200 bp (aCGH relative log2ratio= -0.75 )

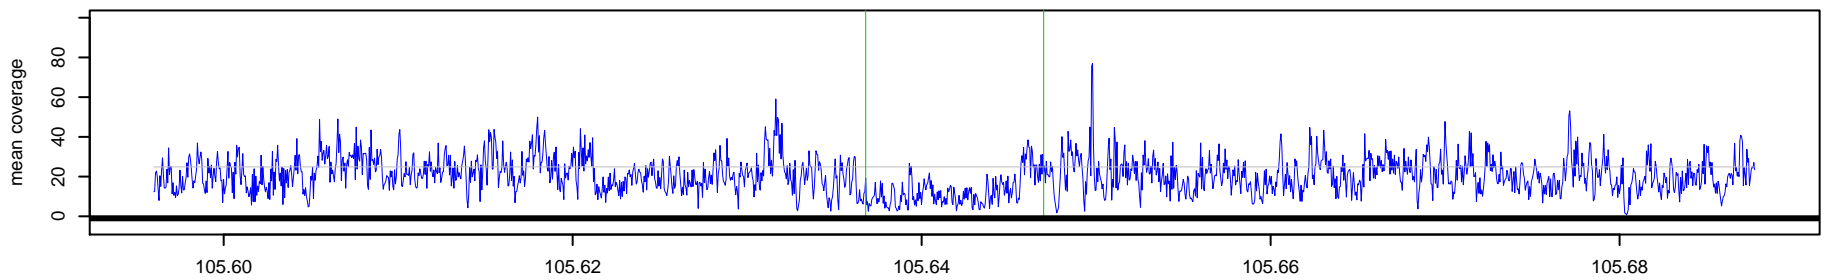

24\_NA10851 Chr 1 : 105636794 – 105646993 , 10200 bp (aCGH relative log2ratio= -0.75 )

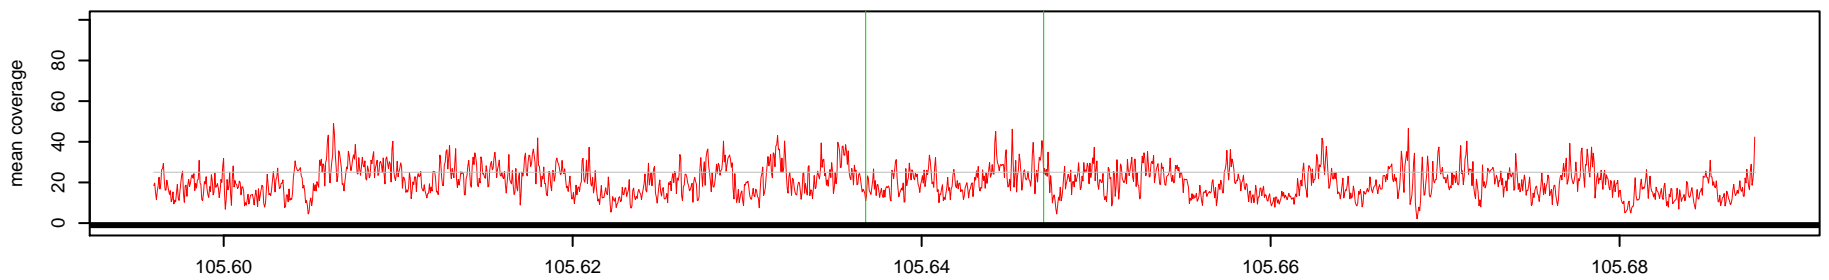

Log2( AK1 read depth / NA10851 read depth)

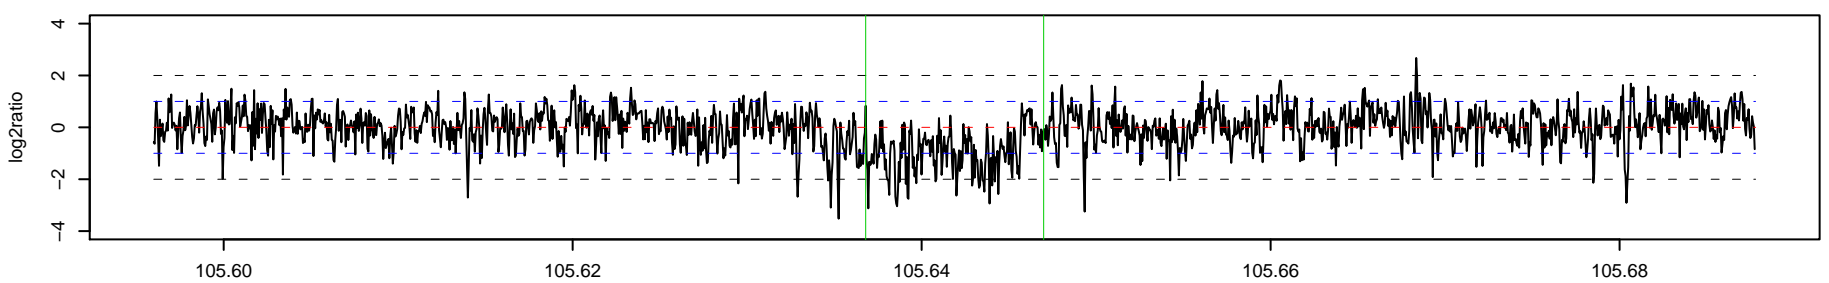



25\_AK1 Chr 1 : 105817666 – 105824239 , 6574 bp (aCGH relative log2ratio= -4.20 )

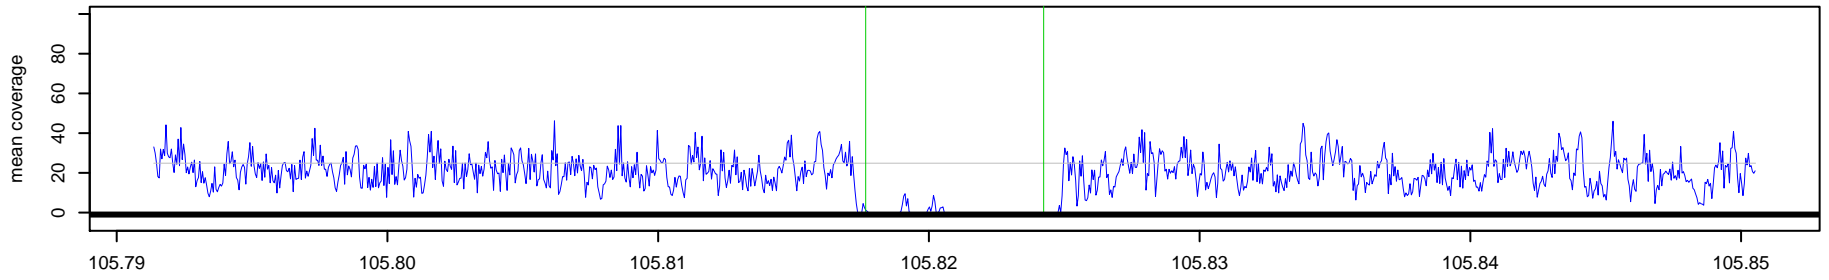

25\_NA10851 Chr 1 : 105817666 – 105824239 , 6574 bp (aCGH relative log2ratio= -4.20 )

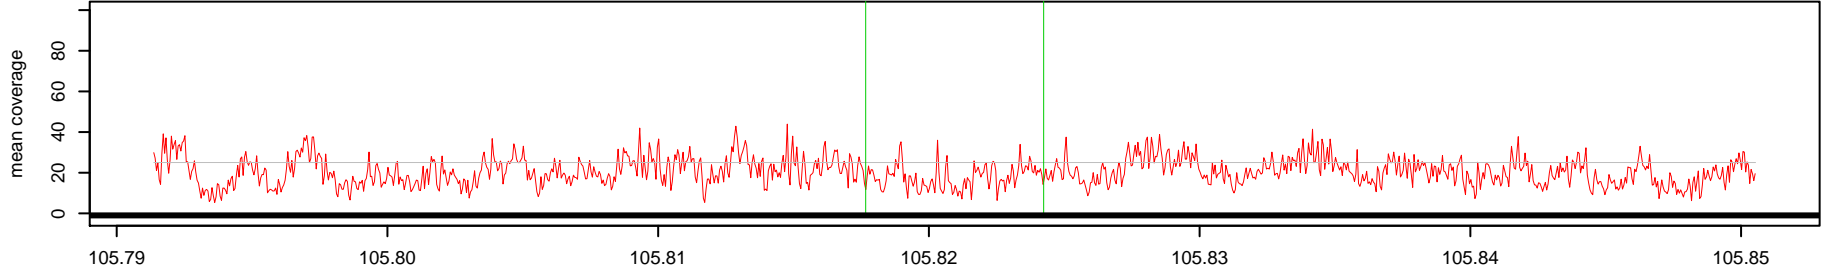

Log2( AK1 read depth / NA10851 read depth)

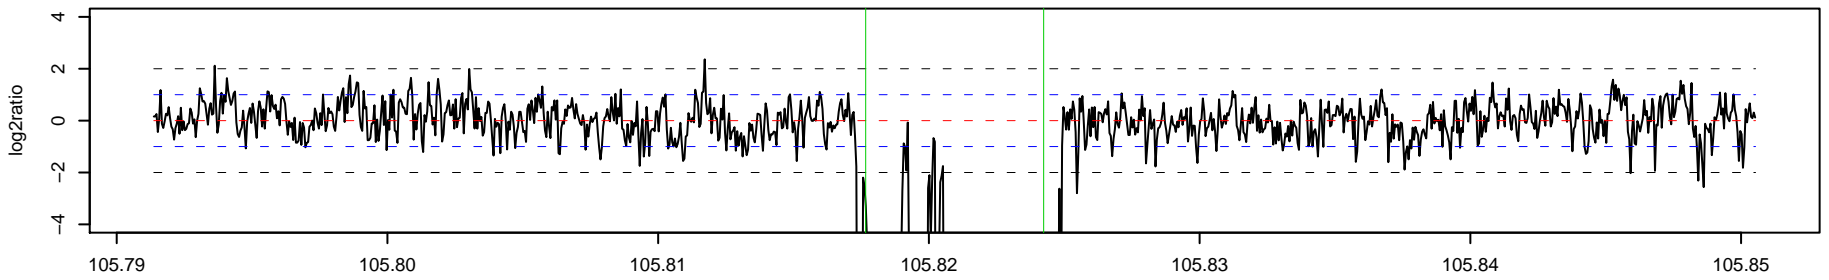

o

o

26\_AK1 Chr 1 : 108534773 – 108538783 , 4011 bp (aCGH relative log2ratio= 0.62 )

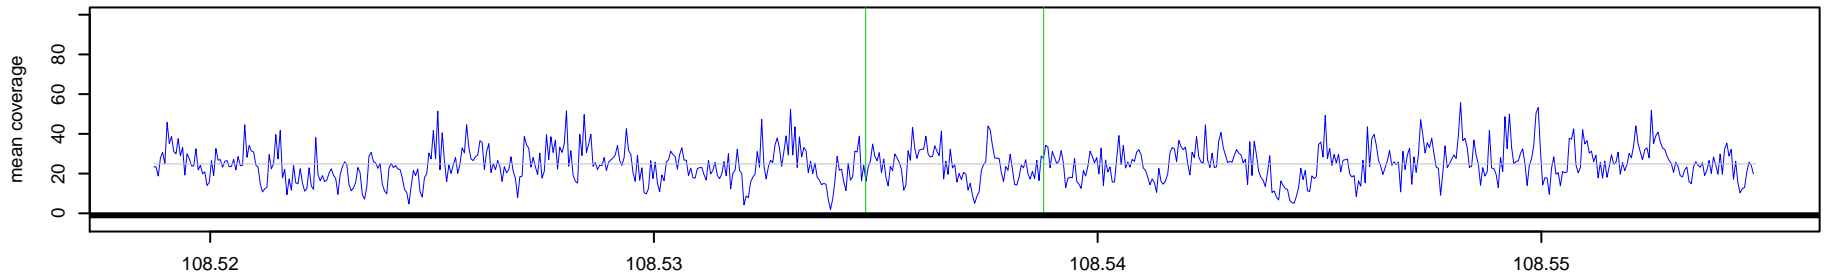

26\_NA10851 Chr 1 : 108534773 – 108538783 , 4011 bp (aCGH relative log2ratio= 0.62 )

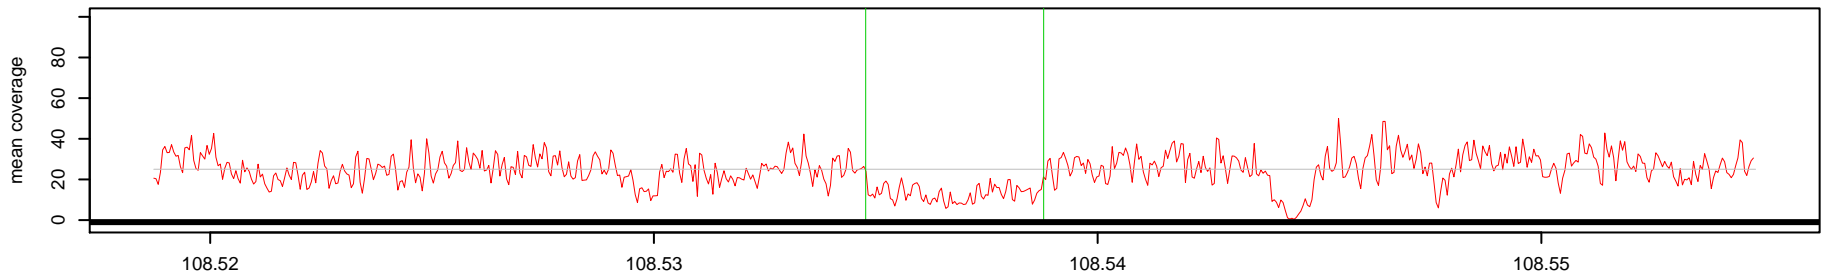

Log2( AK1 read depth / NA10851 read depth)

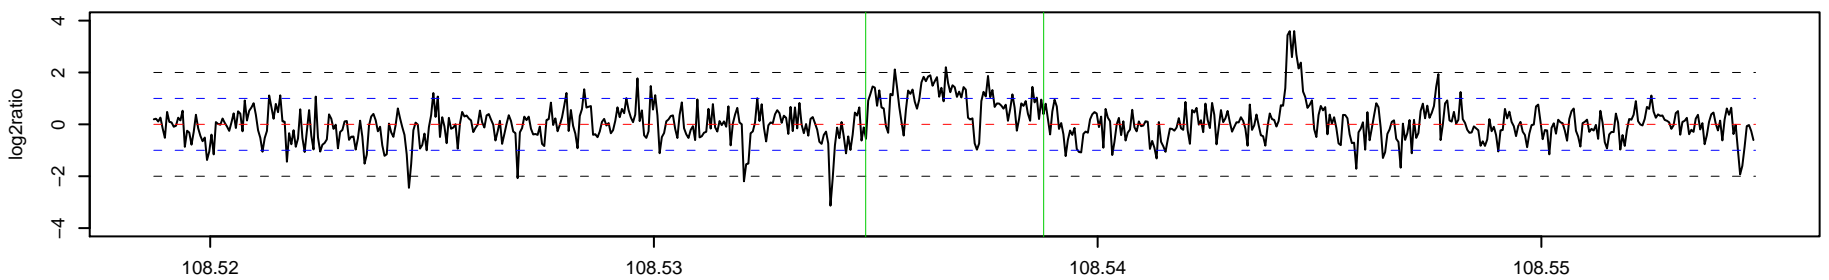

27\_AK1 Chr 1 : 109988565 – 109989665 , 1101 bp (aCGH relative log2ratio= -2.46 )

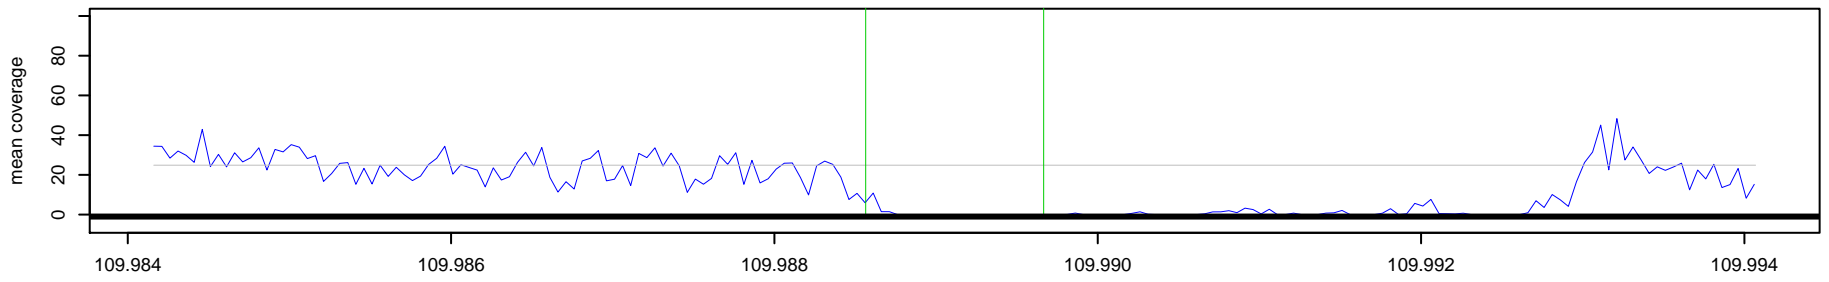

27\_NA10851 Chr 1 : 109988565 – 109989665 , 1101 bp (aCGH relative log2ratio= -2.46 )

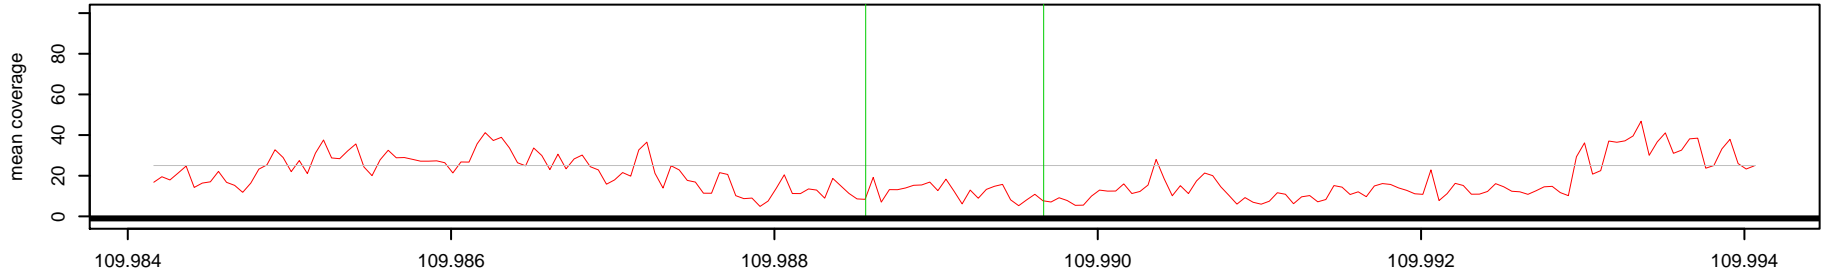

Log2( AK1 read depth / NA10851 read depth)

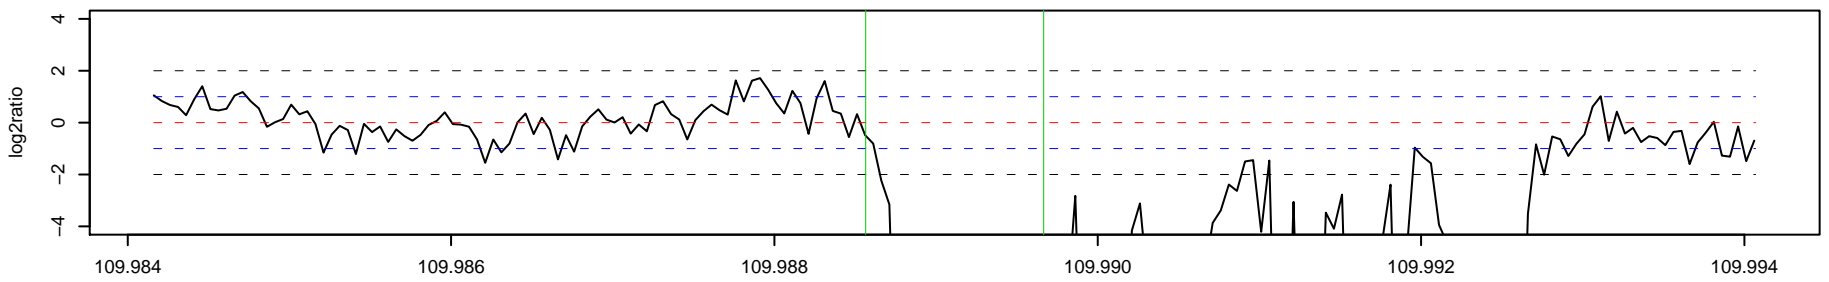

28\_AK1 Chr 1 : 112495644 – 112505908 , 10265 bp (aCGH relative log2ratio= -1.64 )

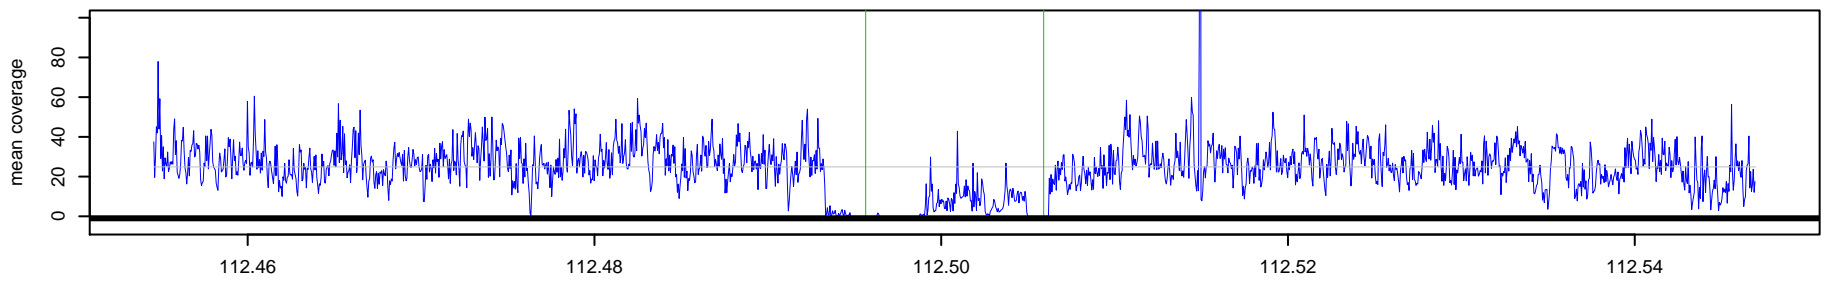

28\_NA10851 Chr 1 : 112495644 – 112505908 , 10265 bp (aCGH relative log2ratio= -1.64 )

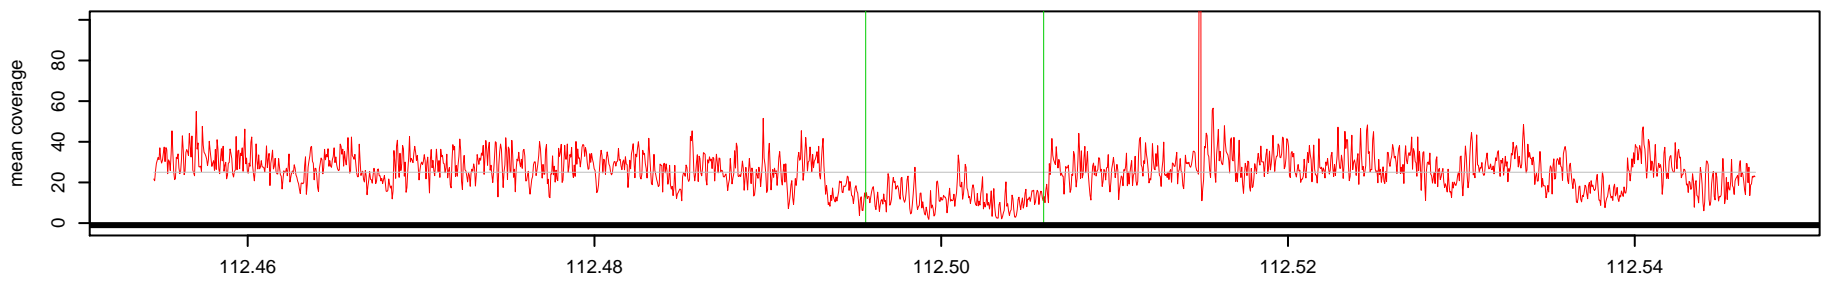

Log2( AK1 read depth / NA10851 read depth)

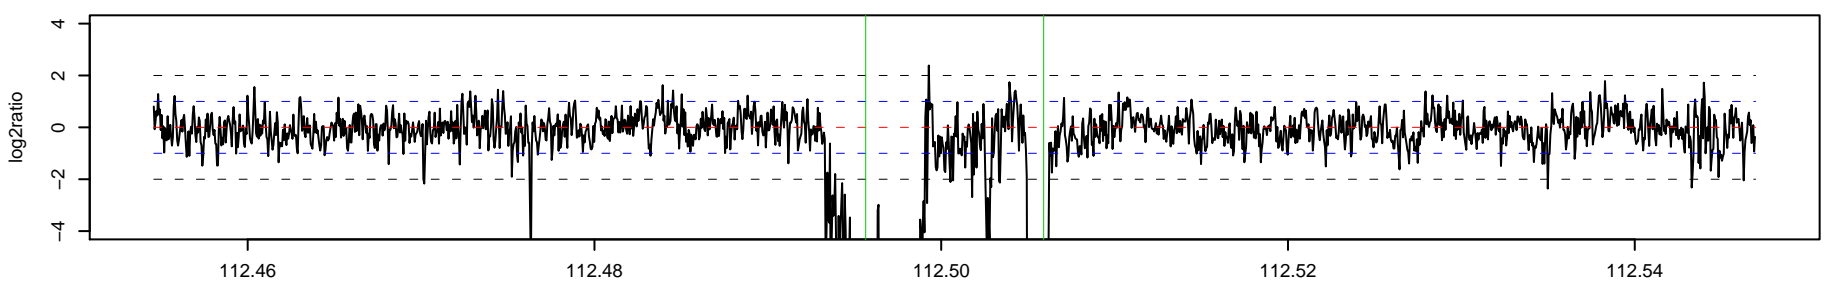

29\_AK1 Chr 1 : 117682363 – 117683127 , 765 bp (aCGH relative log2ratio= 0.94 )

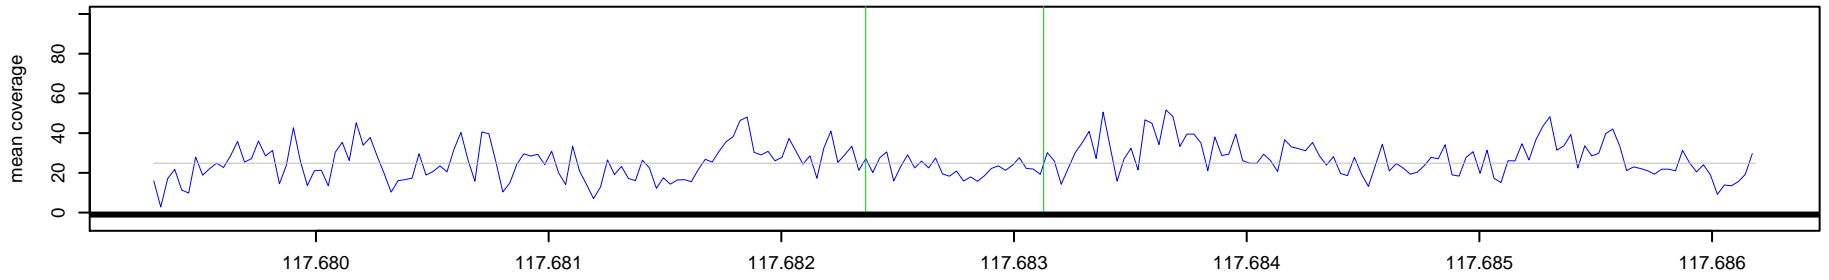

29\_NA10851 Chr 1 : 117682363 – 117683127 , 765 bp (aCGH relative log2ratio= 0.94 )

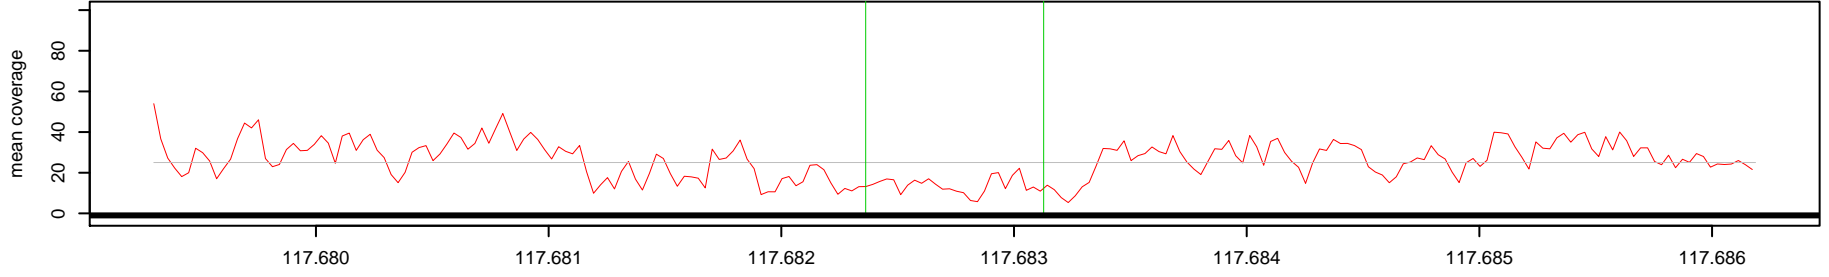

Log2( AK1 read depth / NA10851 read depth)

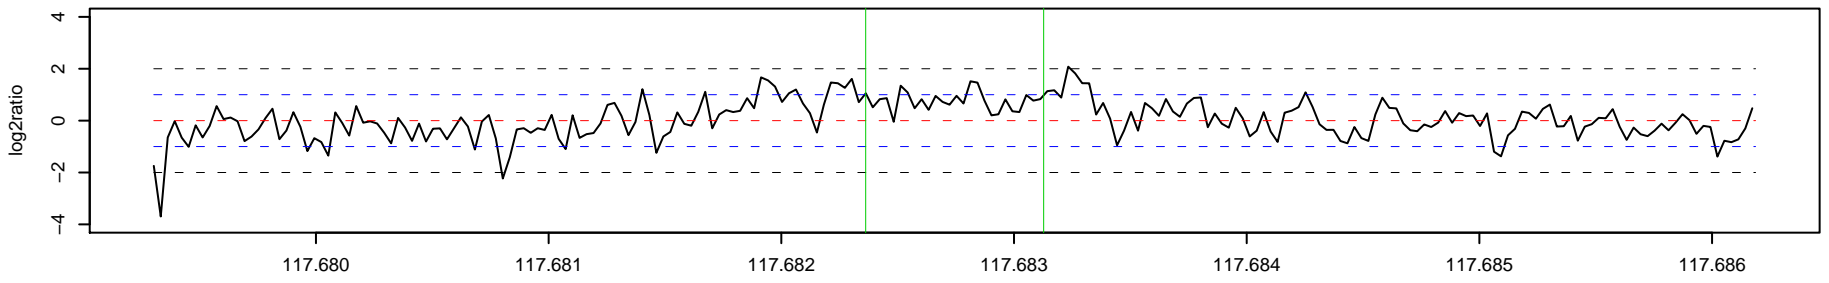

30\_AK1 Chr 1 : 120347624 – 120410487 , 62864 bp (aCGH relative log2ratio= 0.67 )

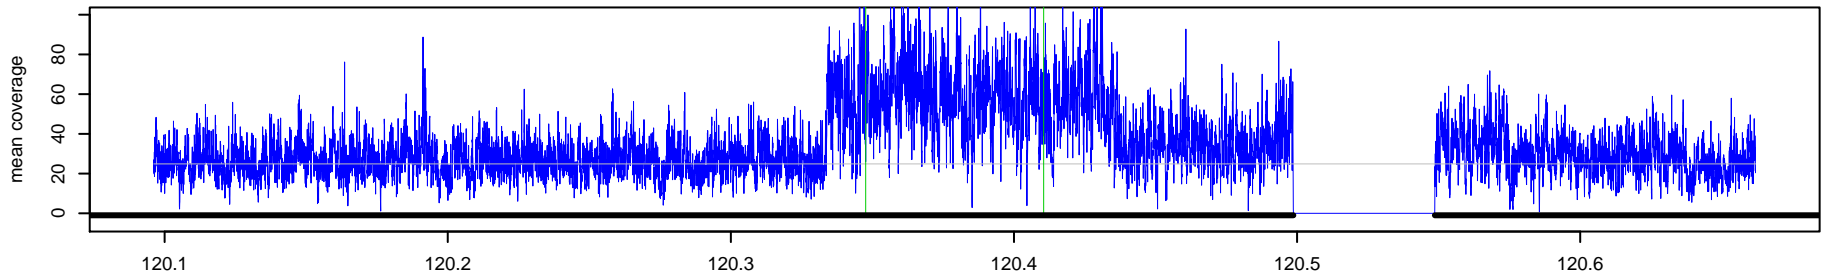

30\_NA10851 Chr 1 : 120347624 – 120410487 , 62864 bp (aCGH relative log2ratio= 0.67 )

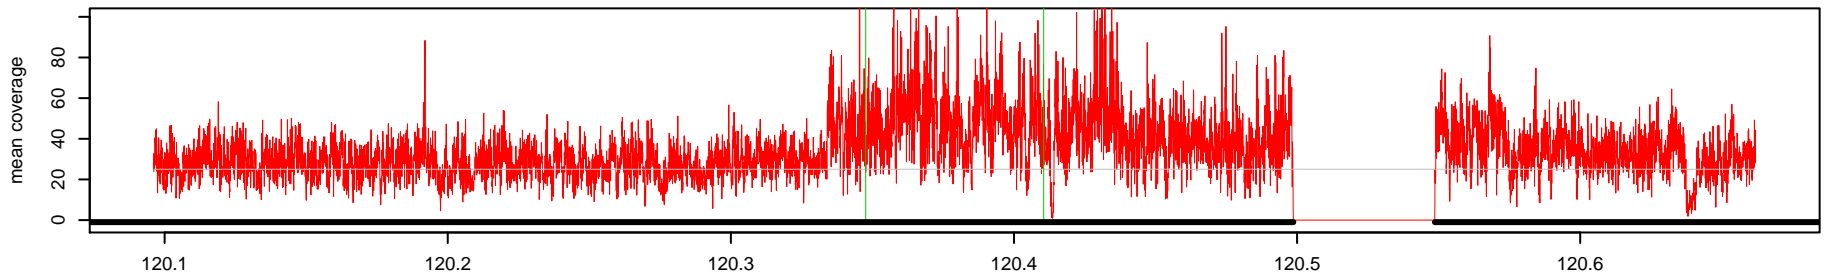

Log2( AK1 read depth / NA10851 read depth)

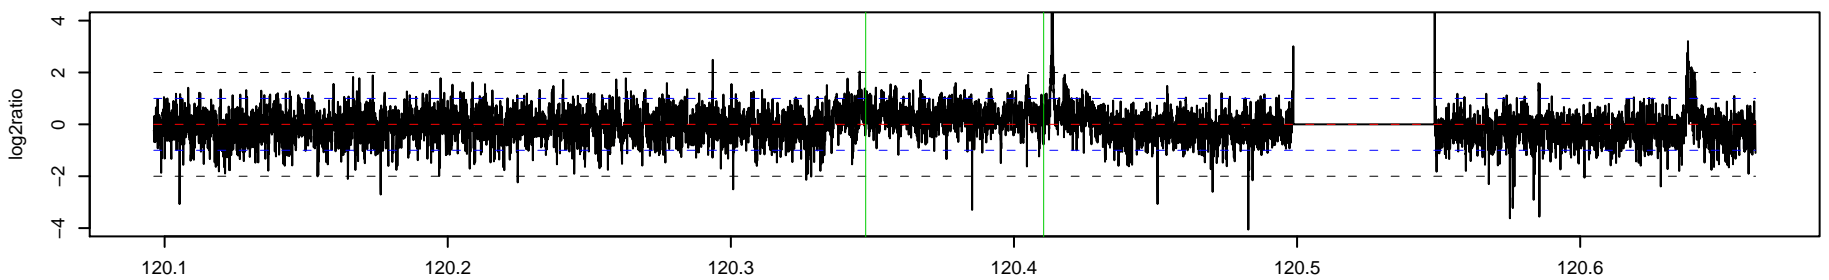

31\_AK1 Chr 1 : 143697187 – 143791548 , 94362 bp (aCGH relative log2ratio= 0.44 )

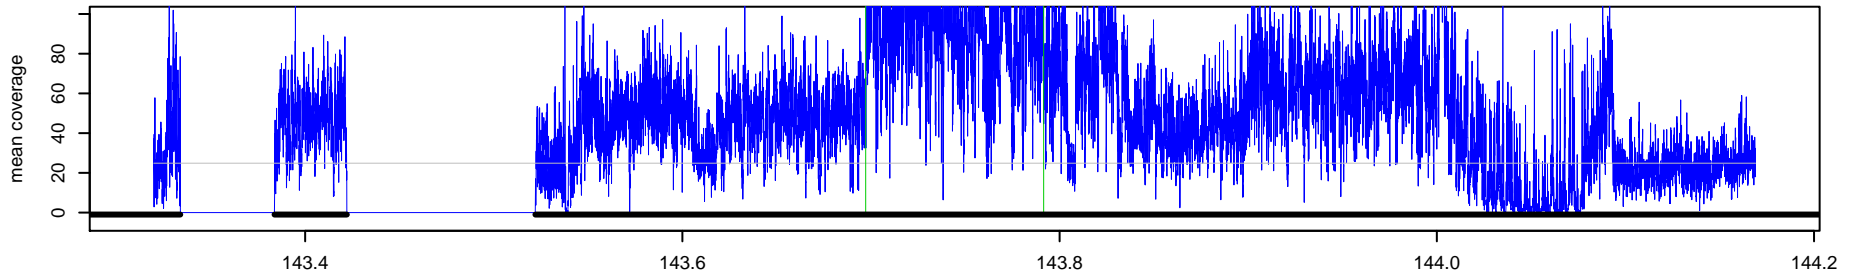

31\_NA10851 Chr 1 : 143697187 – 143791548 , 94362 bp (aCGH relative log2ratio= 0.44 )

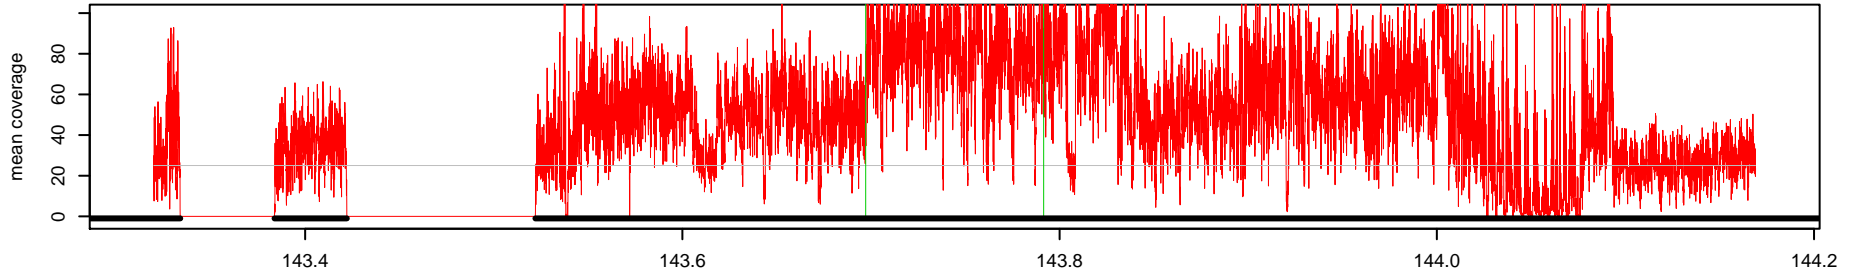

Log2( AK1 read depth / NA10851 read depth)

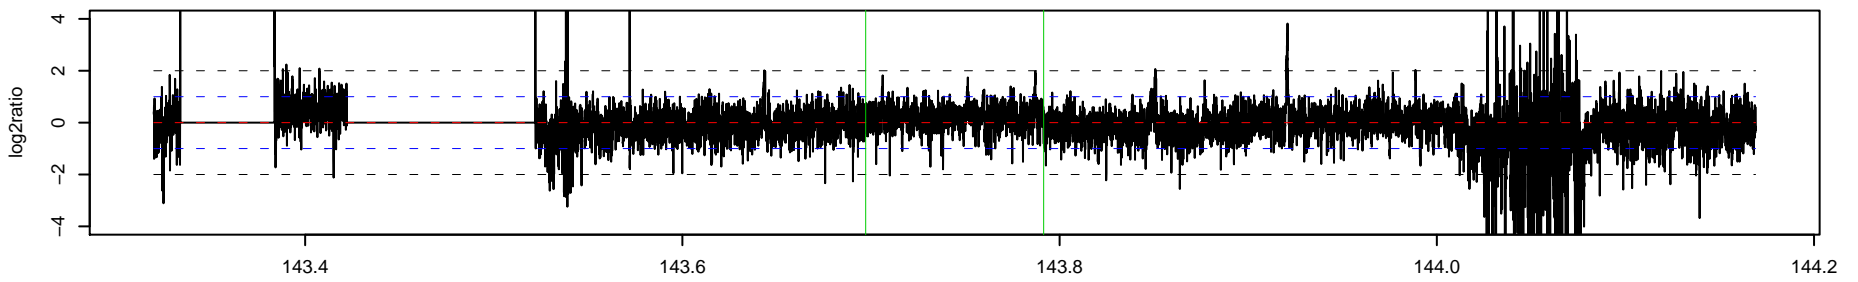

32\_AK1 Chr 1 : 143926401 – 144000824 , 74424 bp (aCGH relative log2ratio= 0.51 )

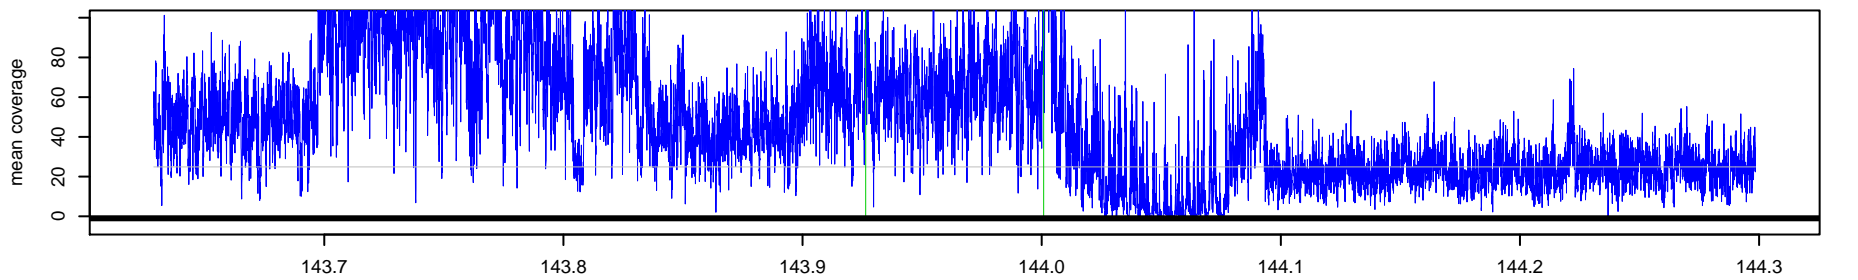

32\_NA10851 Chr 1 : 143926401 – 144000824 , 74424 bp (aCGH relative log2ratio= 0.51 )

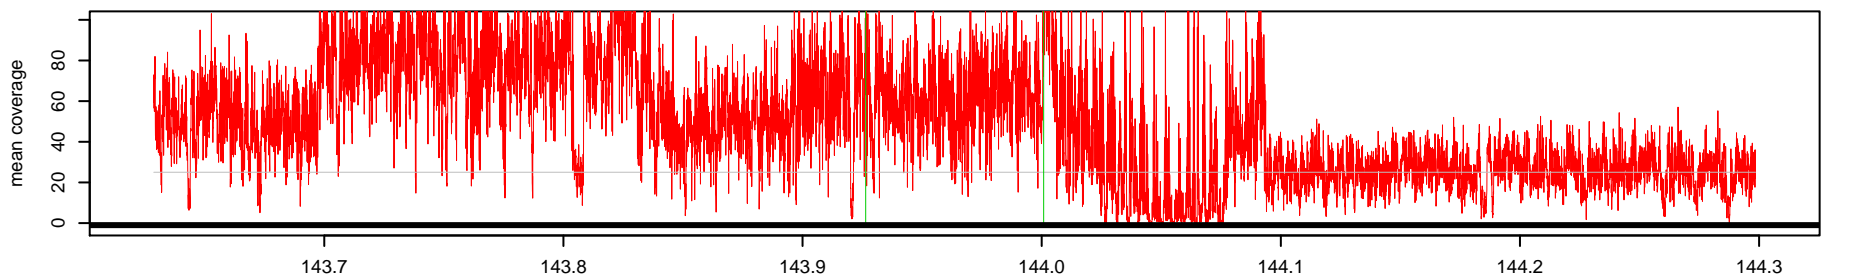

Log2( AK1 read depth / NA10851 read depth)

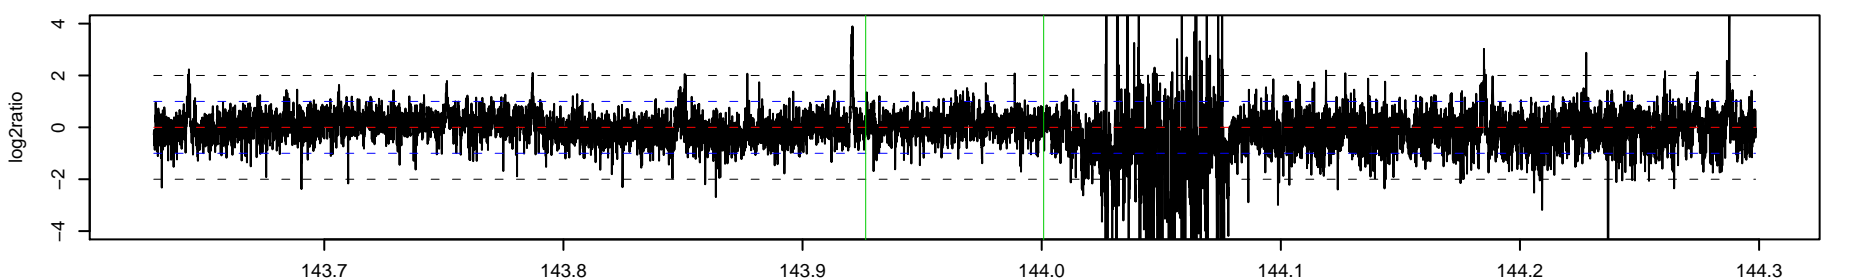

33\_AK1 Chr 1 : 156992934 – 156994749 , 1816 bp (aCGH relative log2ratio= 0.73 )

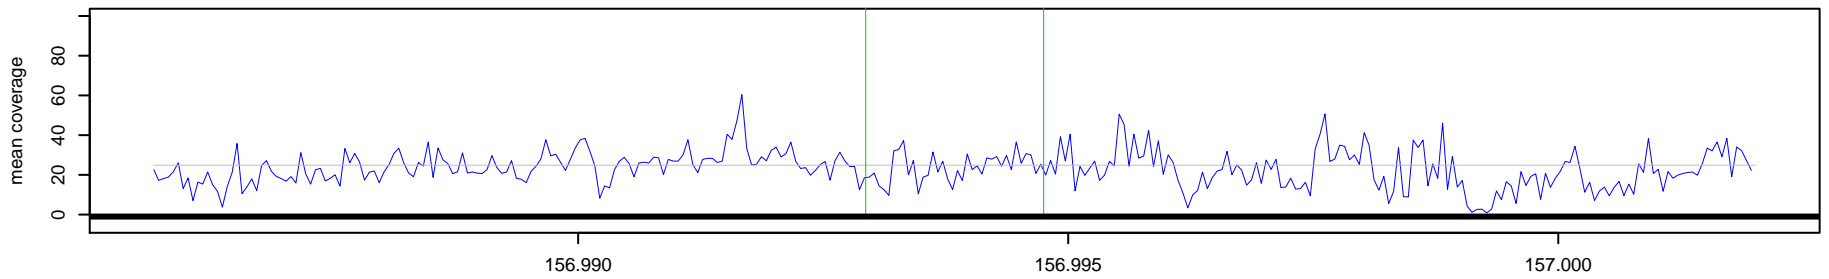

33\_NA10851 Chr 1 : 156992934 – 156994749 , 1816 bp (aCGH relative log2ratio= 0.73 )

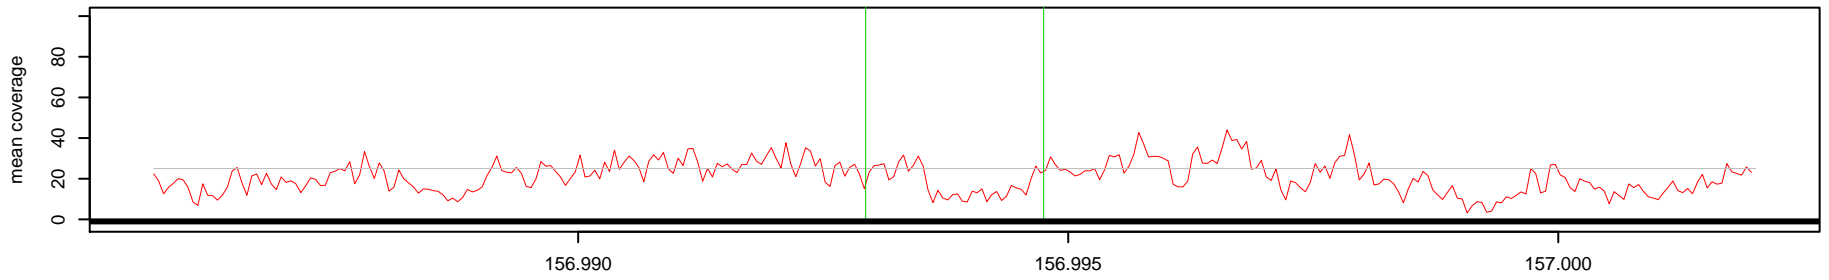

Log2( AK1 read depth / NA10851 read depth)

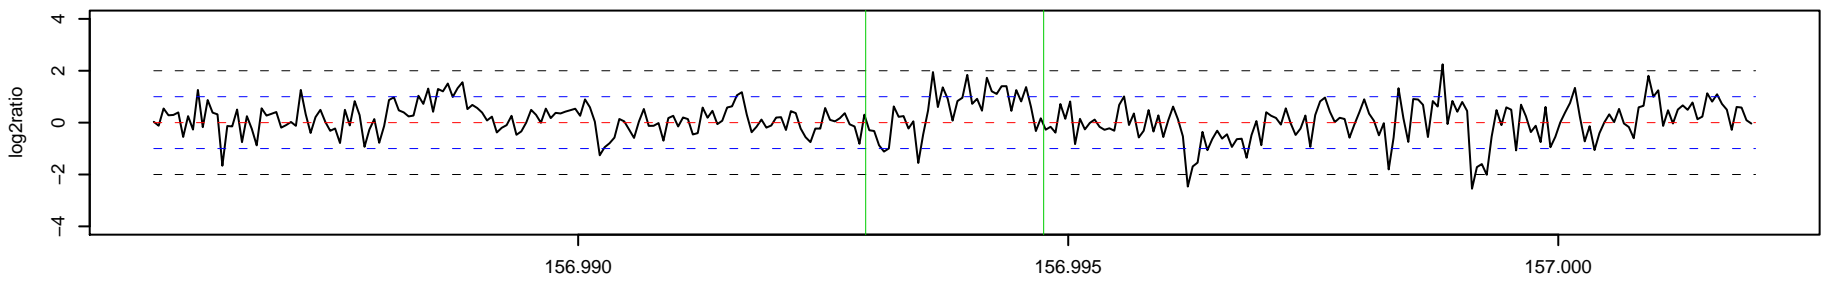

34\_AK1 Chr 1 : 157134340 – 157136581 , 2242 bp (aCGH relative log2ratio= -2.67 )

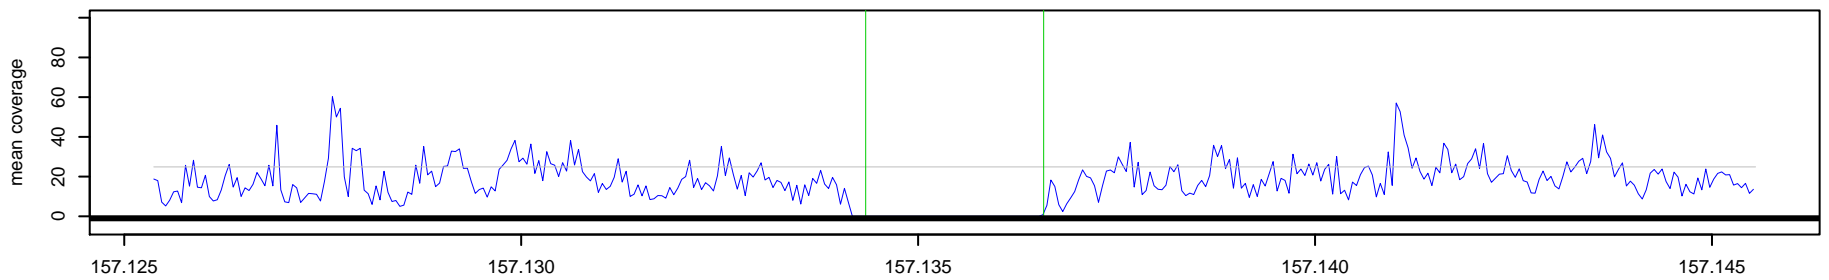

34\_NA10851 Chr 1 : 157134340 – 157136581 , 2242 bp (aCGH relative log2ratio= -2.67 )

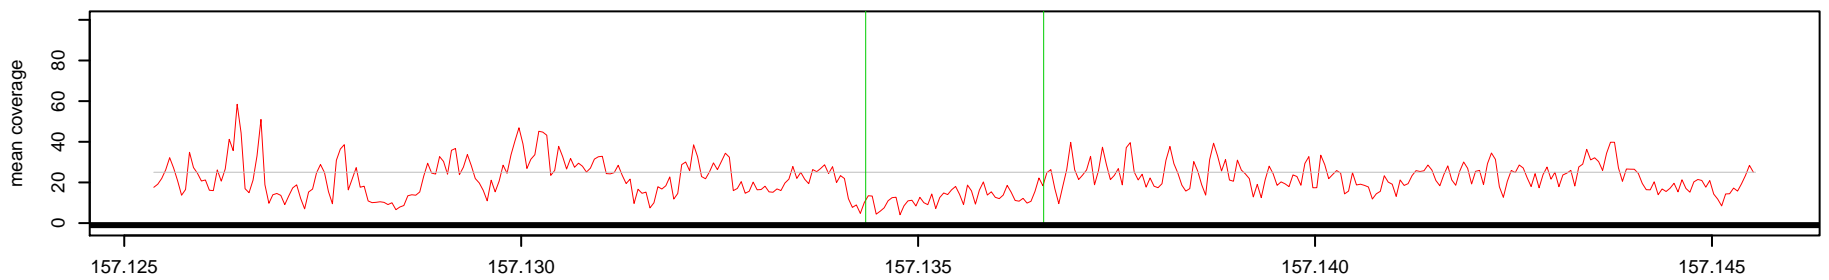

Log2( AK1 read depth / NA10851 read depth)

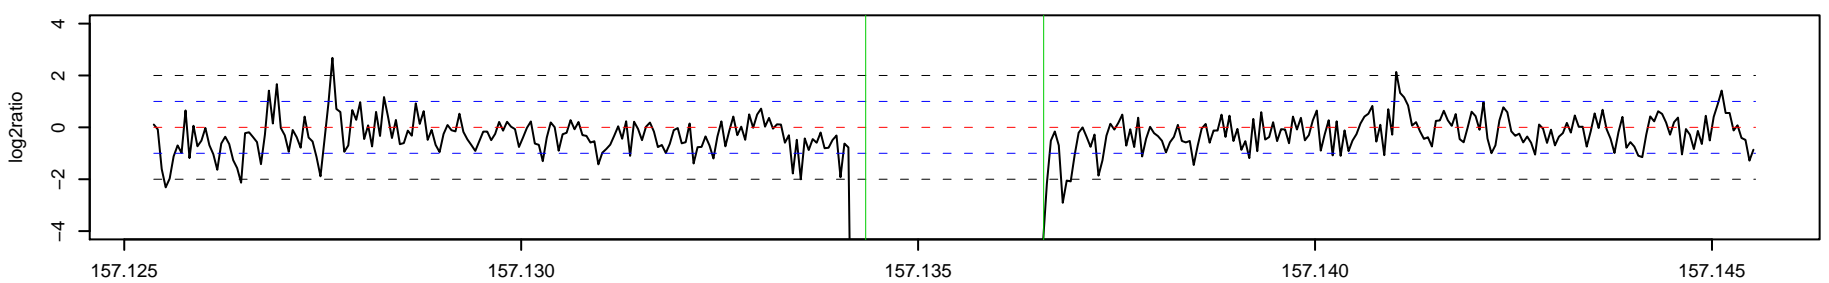

35\_AK1 Chr 1 : 157228238 – 157232725 , 4488 bp (aCGH relative log2ratio= 0.55 )

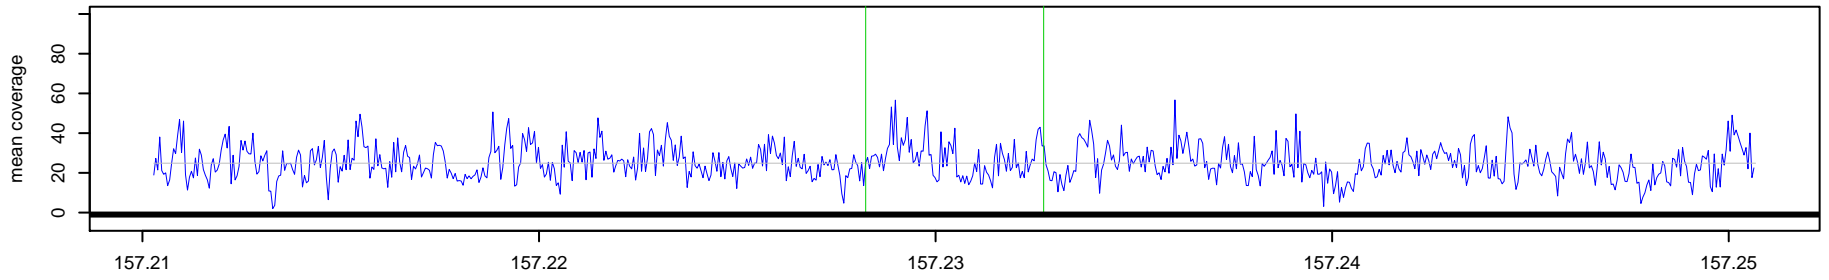

35\_NA10851 Chr 1 : 157228238 – 157232725 , 4488 bp (aCGH relative log2ratio= 0.55 )

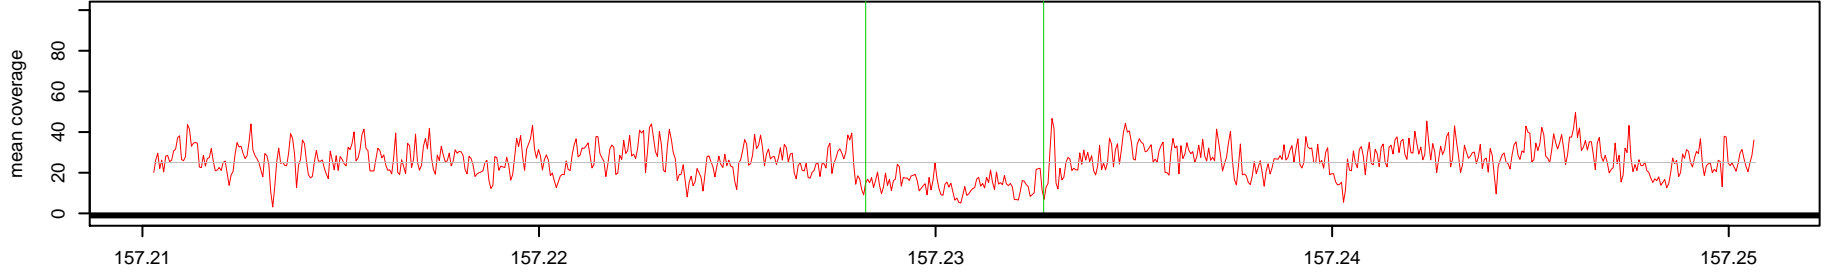

Log2( AK1 read depth / NA10851 read depth)

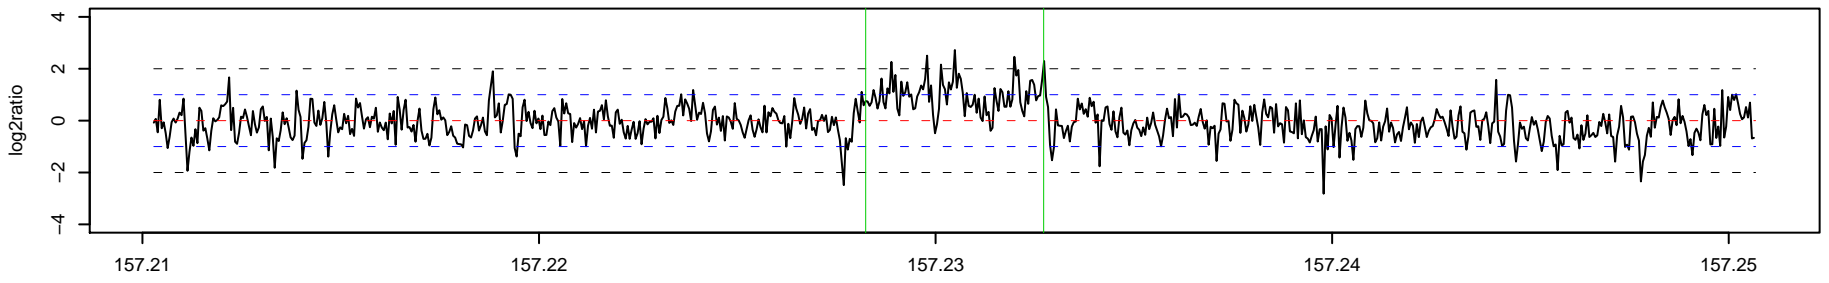

36\_AK1 Chr 1 : 157915317 – 157916265 , 949 bp (aCGH relative log2ratio= -2.20 )

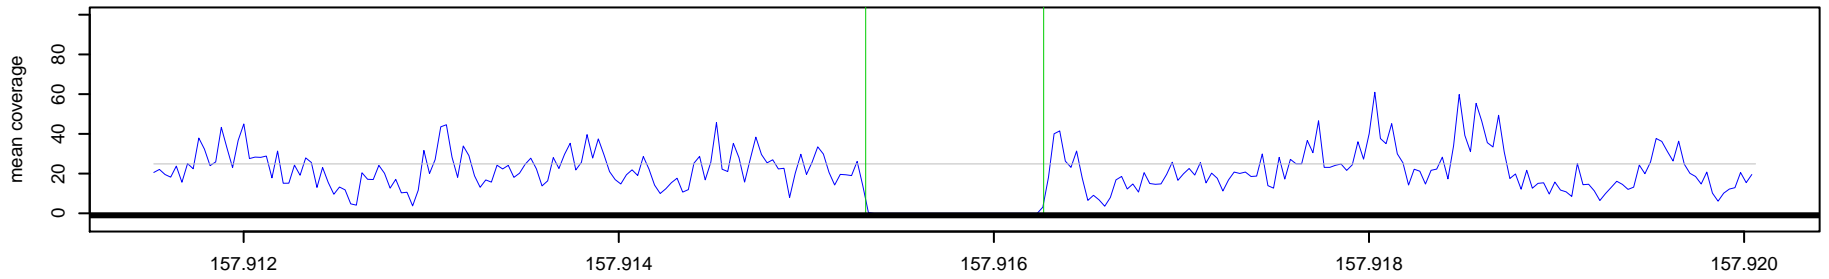

36\_NA10851 Chr 1 : 157915317 – 157916265 , 949 bp (aCGH relative log2ratio= -2.20 )

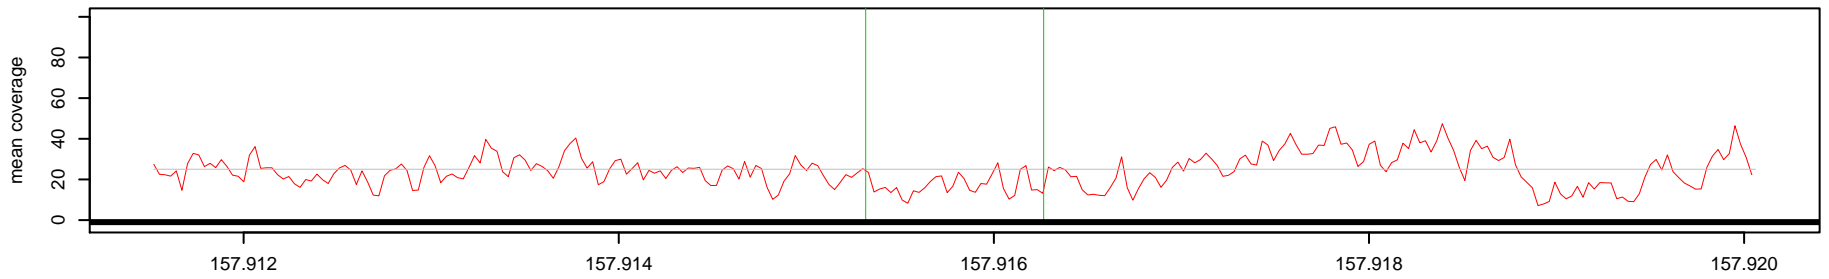

Log2( AK1 read depth / NA10851 read depth)

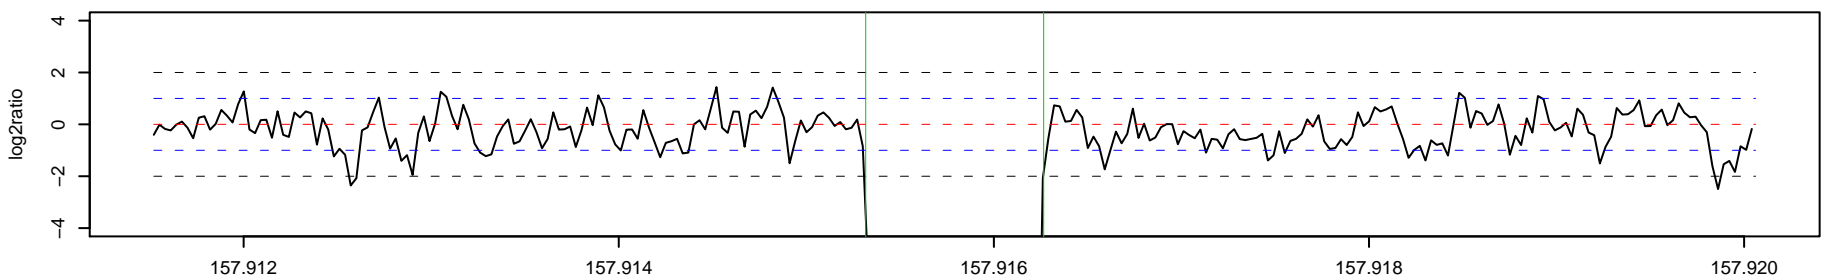

37\_AK1 Chr 1 : 161581014 – 161581537 , 524 bp (aCGH relative log2ratio= 0.54 )

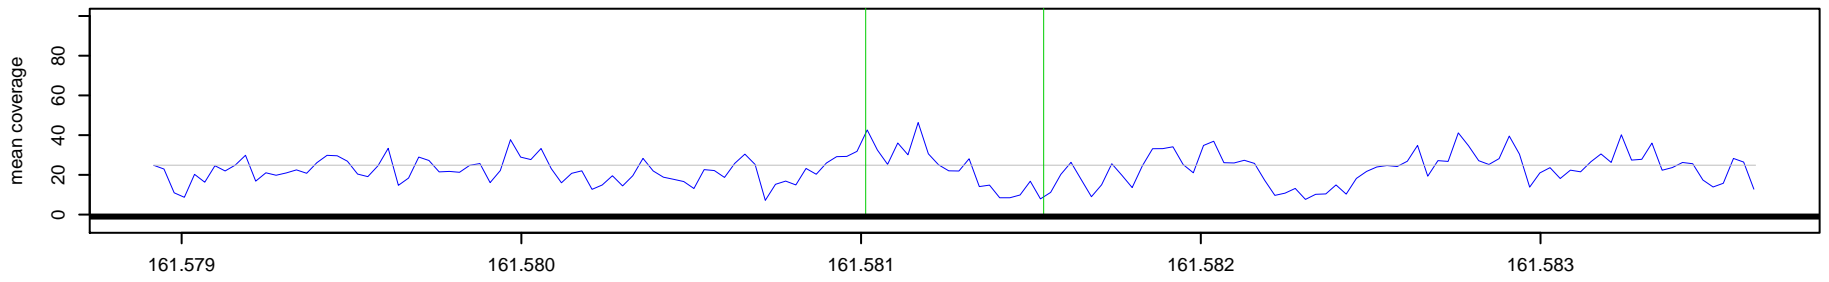

37\_NA10851 Chr 1 : 161581014 – 161581537 , 524 bp (aCGH relative log2ratio= 0.54 )

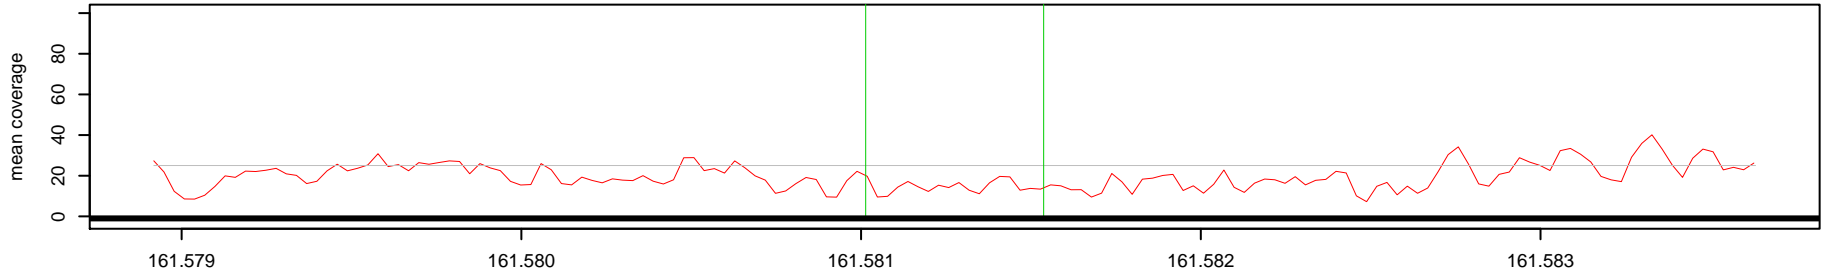

Log2( AK1 read depth / NA10851 read depth)

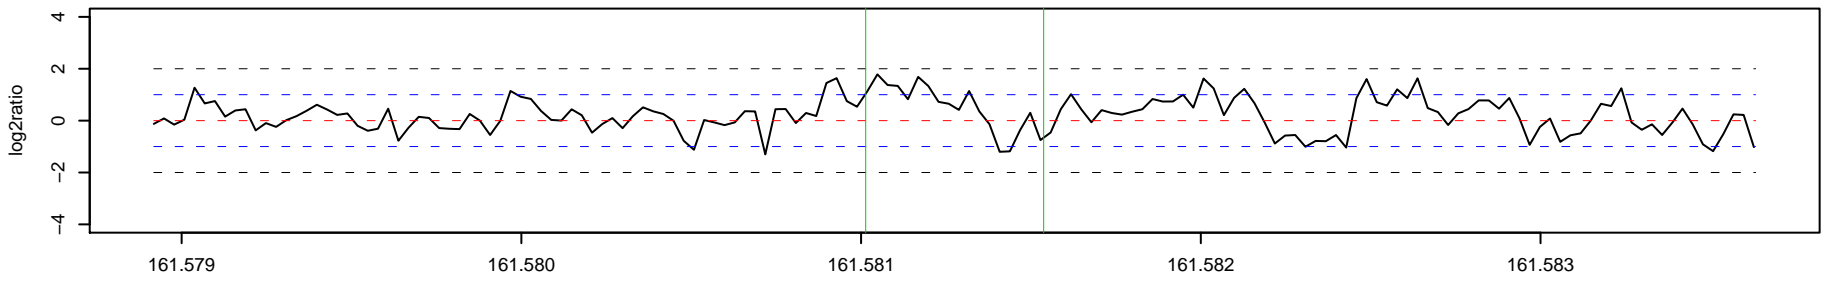

38\_AK1 Chr 1 : 167270982 – 167271946 , 965 bp (aCGH relative log2ratio= 0.77 )

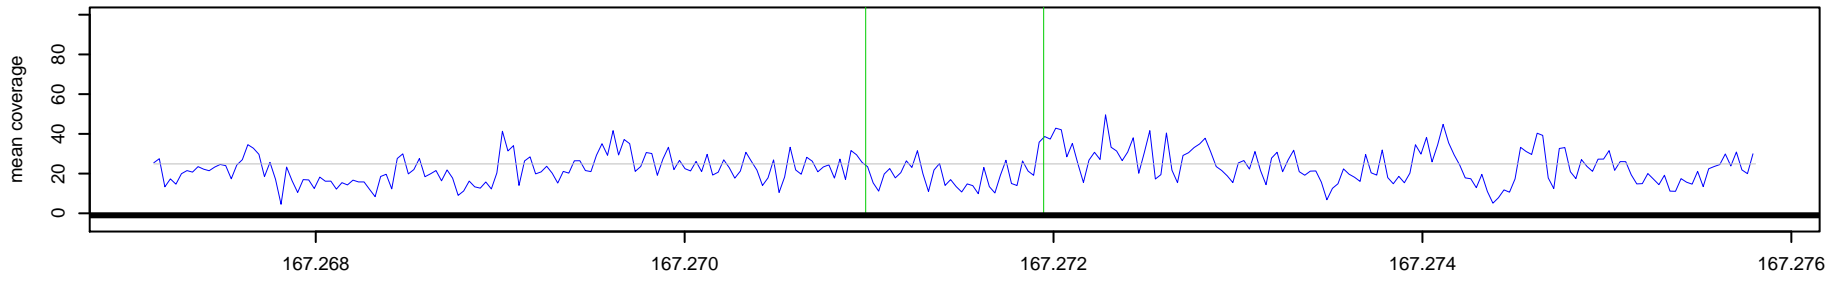

38\_NA10851 Chr 1 : 167270982 – 167271946 , 965 bp (aCGH relative log2ratio= 0.77 )

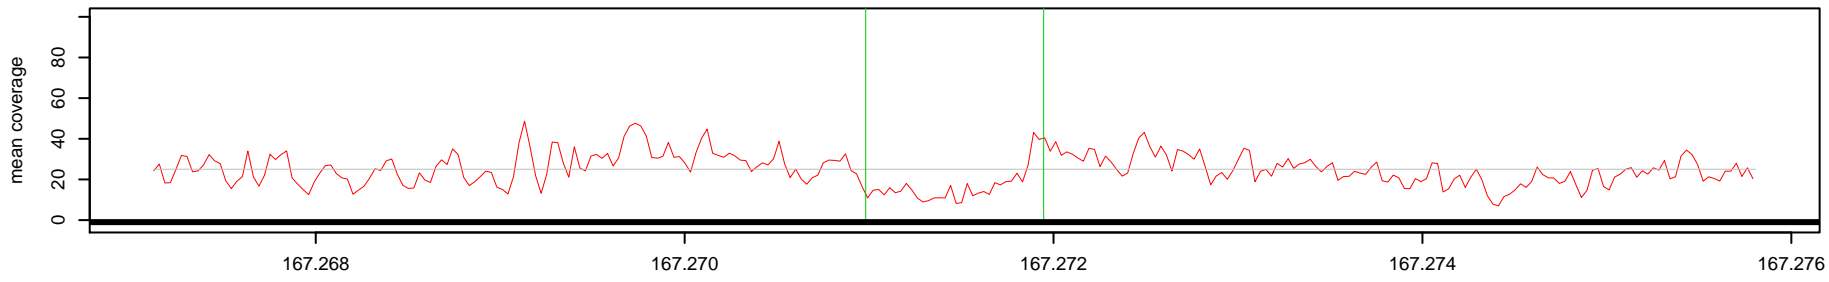

Log2( AK1 read depth / NA10851 read depth)

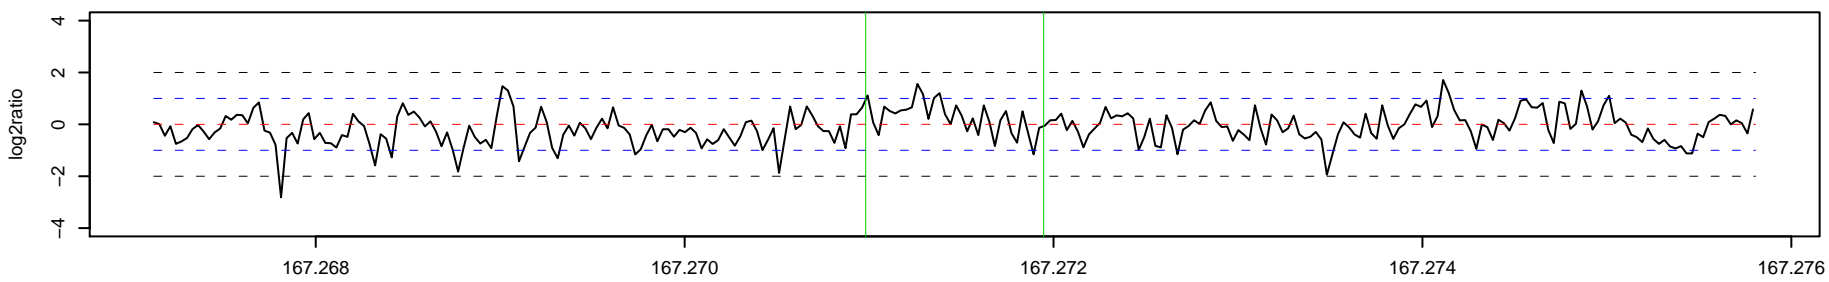

39\_AK1 Chr 1 : 167493568 – 167508098 , 14531 bp (aCGH relative log2ratio= 0.79 )

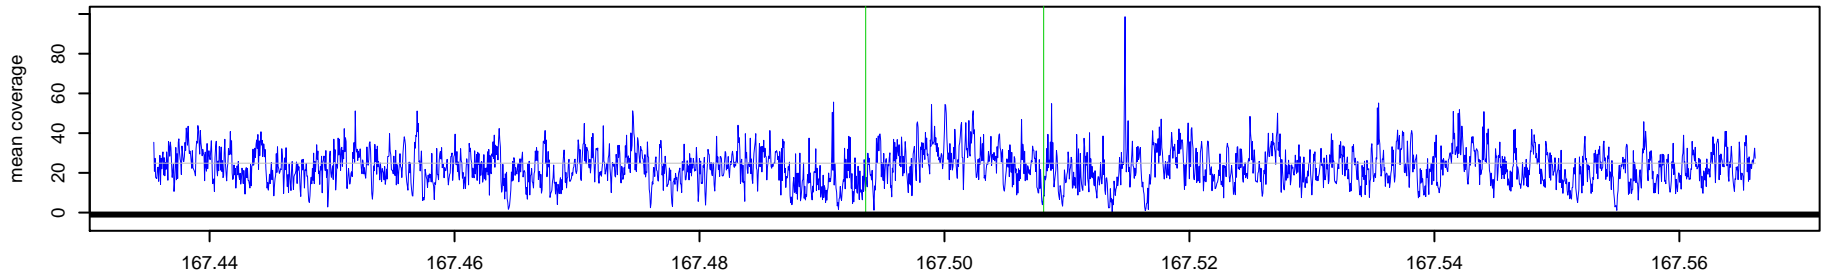

39\_NA10851 Chr 1 : 167493568 – 167508098 , 14531 bp (aCGH relative log2ratio= 0.79 )

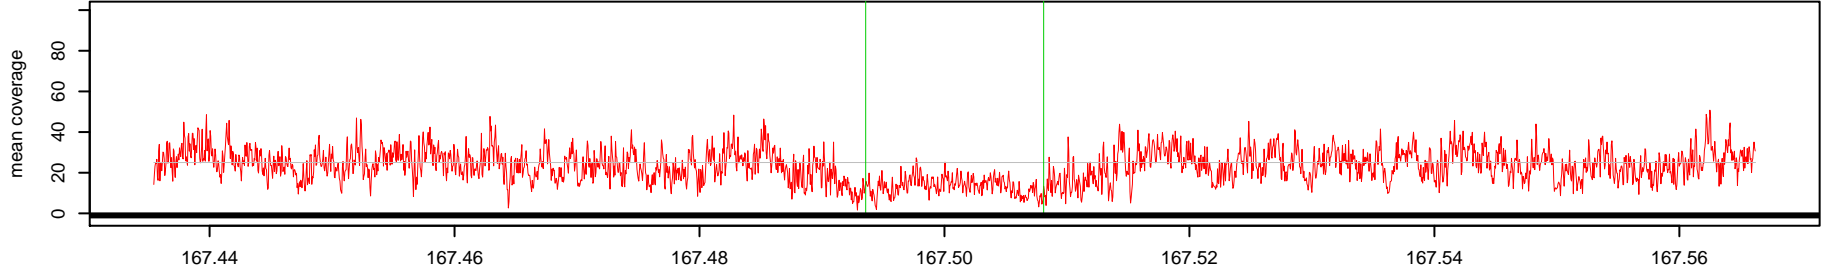

Log2( AK1 read depth / NA10851 read depth)

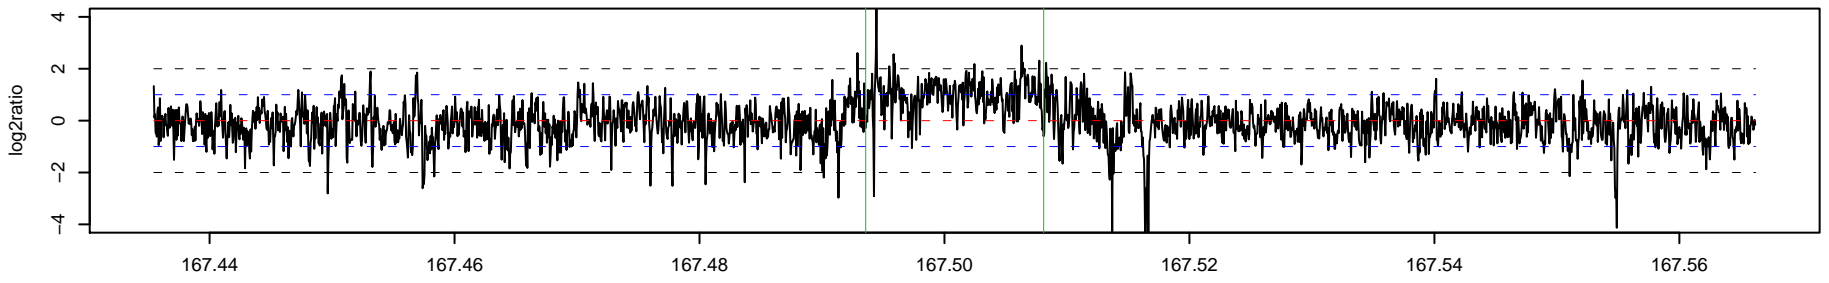

40\_AK1 Chr 1 : 172021992 – 172022675 , 684 bp (aCGH relative log2ratio= 0.36 )

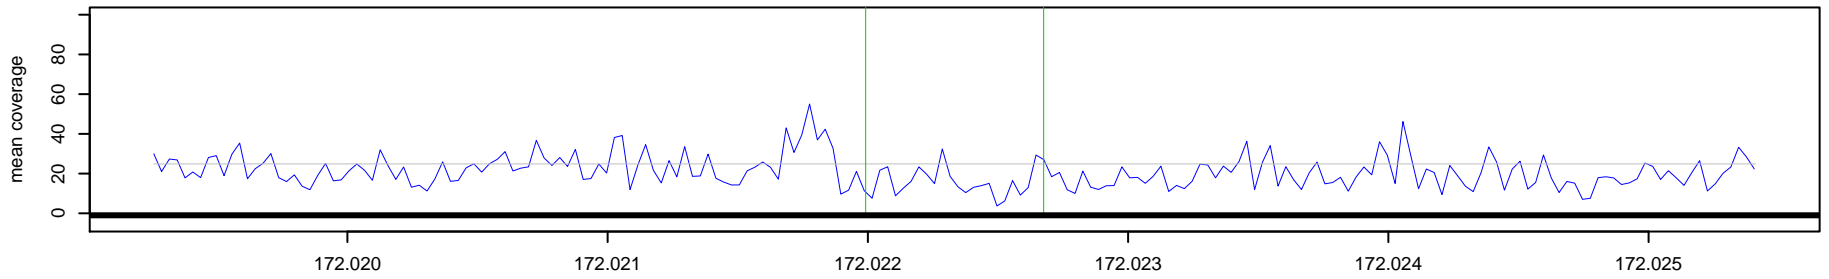

40\_NA10851 Chr 1 : 172021992 – 172022675 , 684 bp (aCGH relative log2ratio= 0.36 )

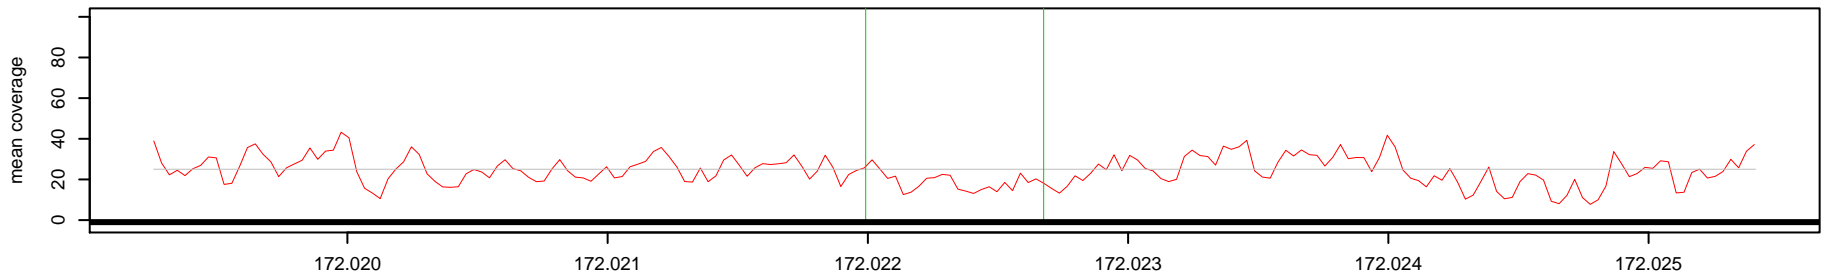

Log2( AK1 read depth / NA10851 read depth)

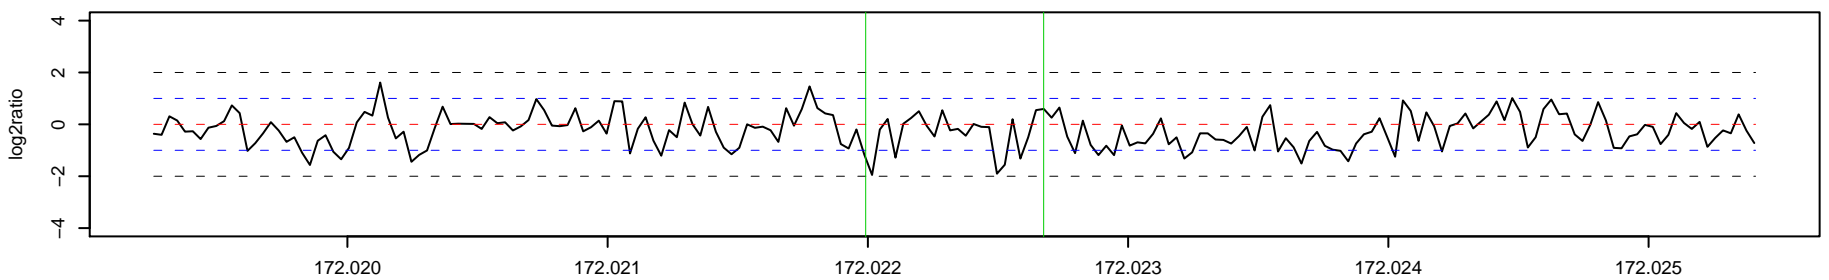



41\_AK1 Chr 1 : 192265689 – 192266182 , 494 bp (aCGH relative log2ratio= -0.69 )

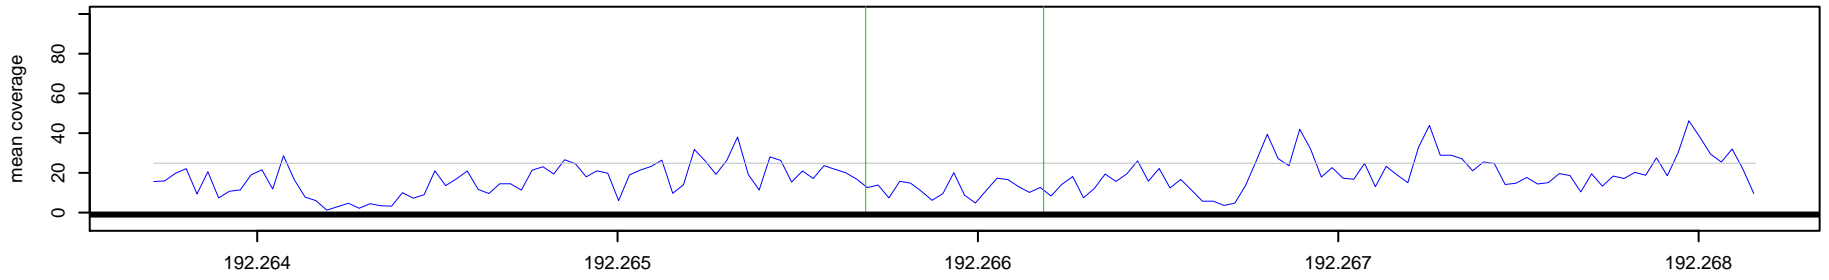

41\_NA10851 Chr 1 : 192265689 – 192266182 , 494 bp (aCGH relative log2ratio= -0.69 )

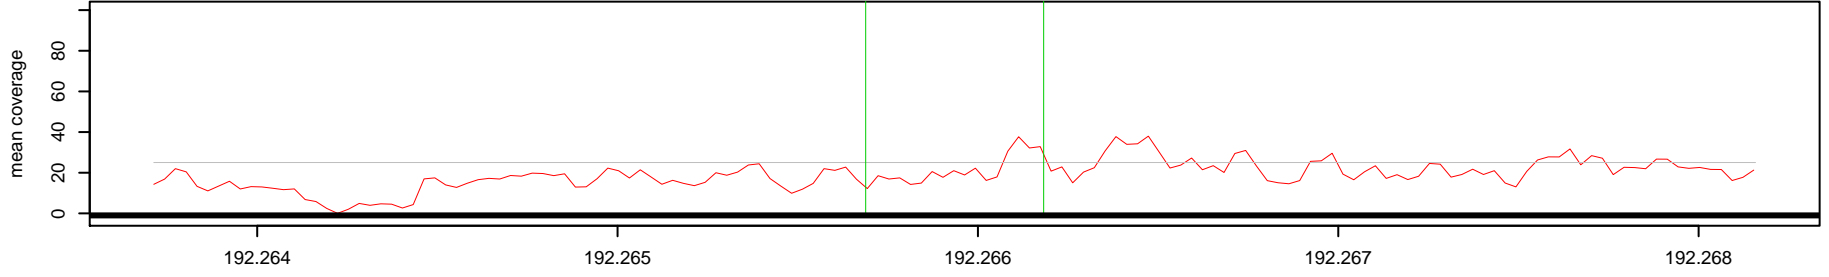

Log2( AK1 read depth / NA10851 read depth)

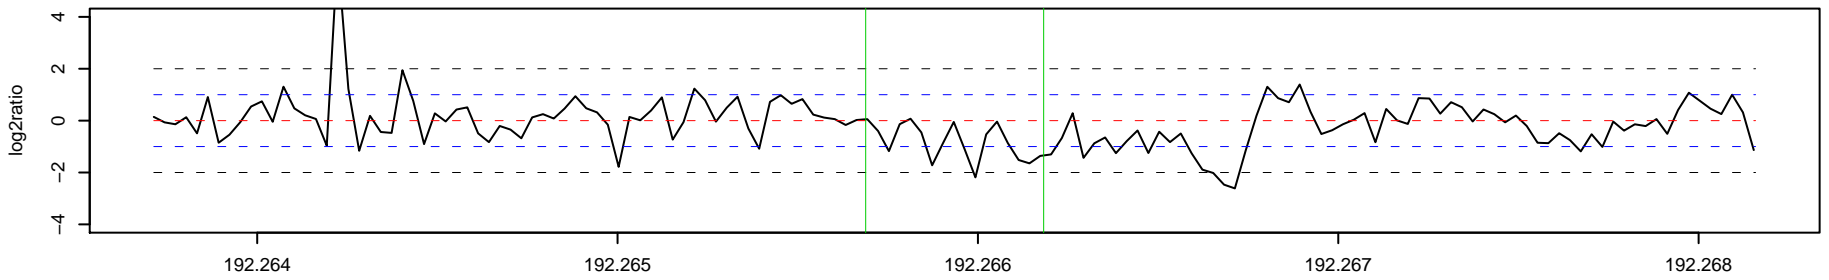

42\_AK1 Chr 1 : 192717643 – 192719944 , 2302 bp (aCGH relative log2ratio= -3.06 )

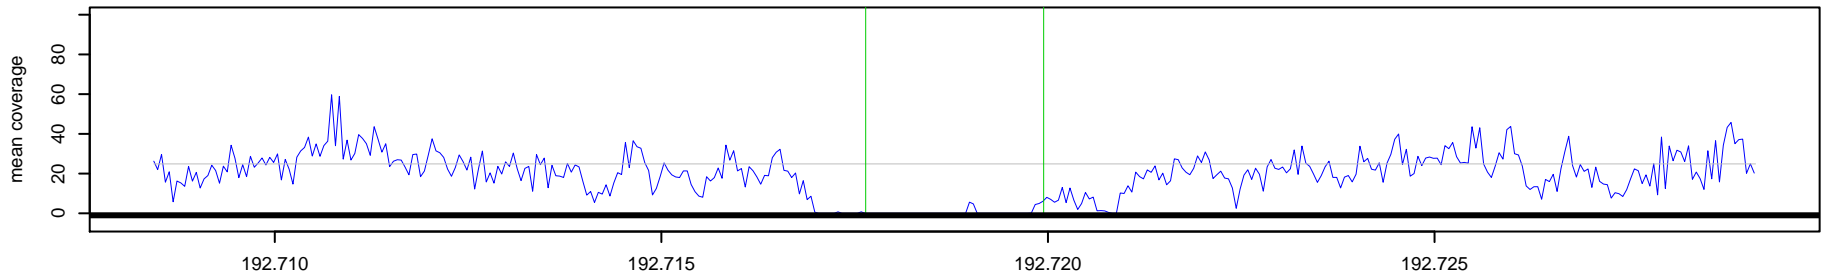

42\_NA10851 Chr 1 : 192717643 – 192719944 , 2302 bp (aCGH relative log2ratio= -3.06 )

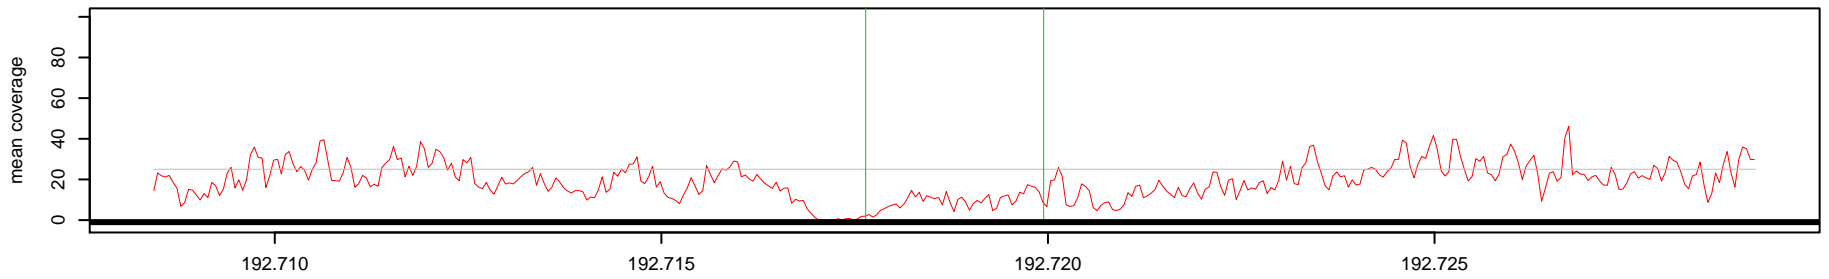

Log2( AK1 read depth / NA10851 read depth)

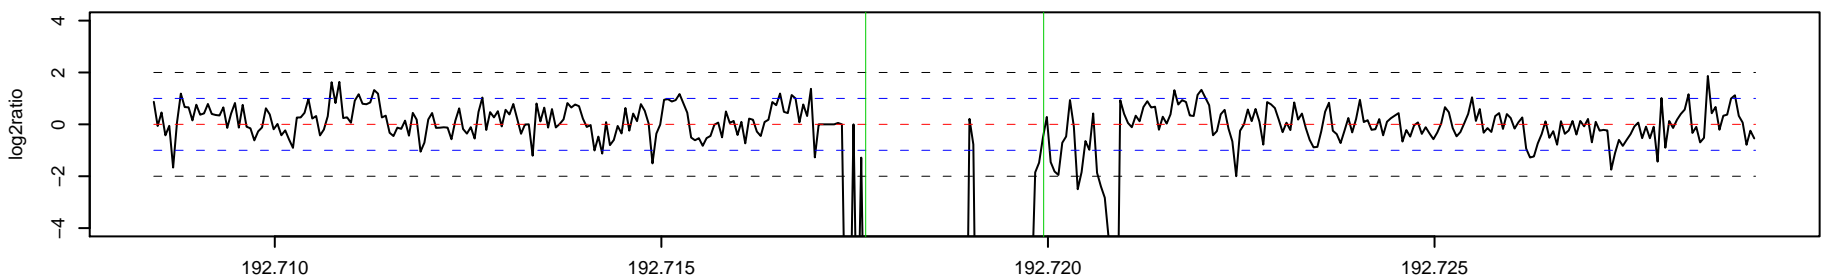

43 \_ AK1 Chr 1 : 195005309 – 195068464 , 63156 bp (aCGH relative log2ratio= 0.77 )

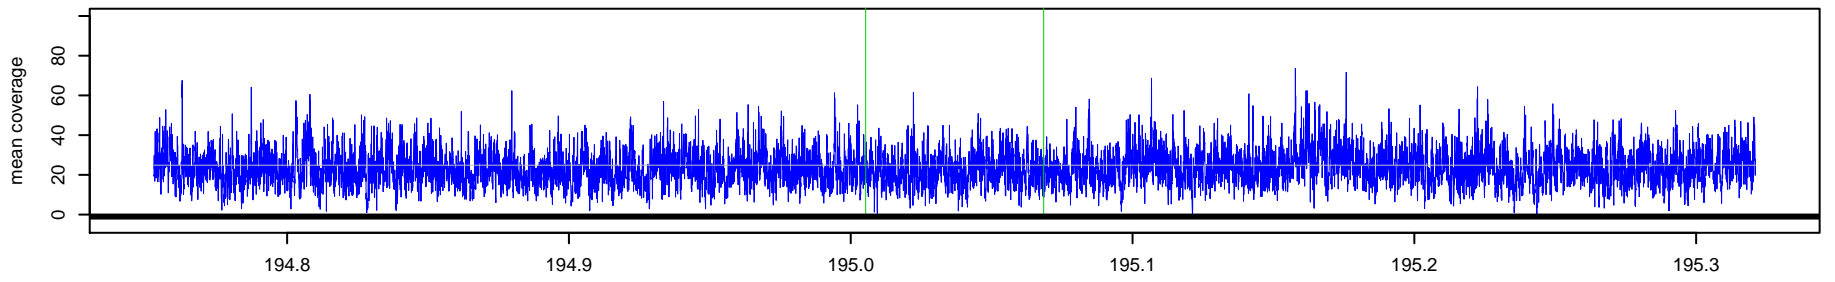

43 \_ NA10851 Chr 1 : 195005309 – 195068464 , 63156 bp (aCGH relative log2ratio= 0.77 )

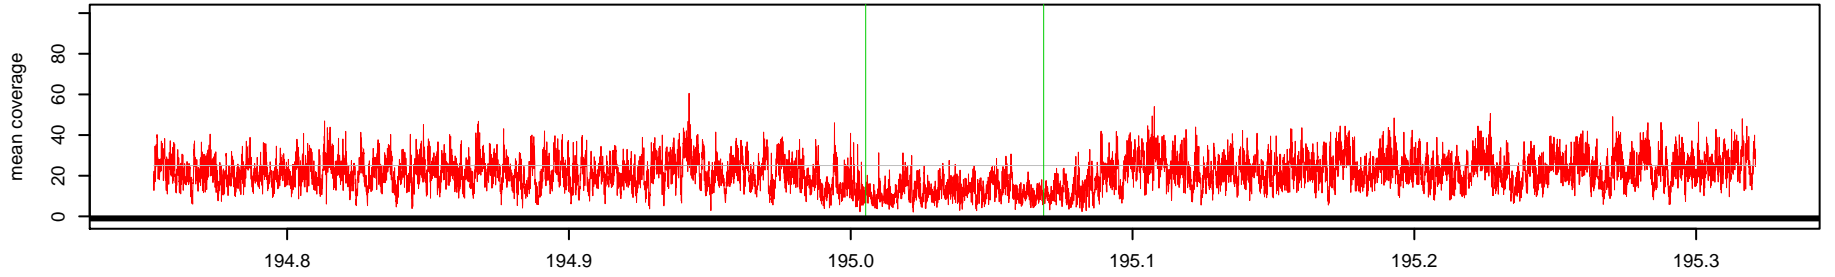

Log2( AK1 read depth / NA10851 read depth)

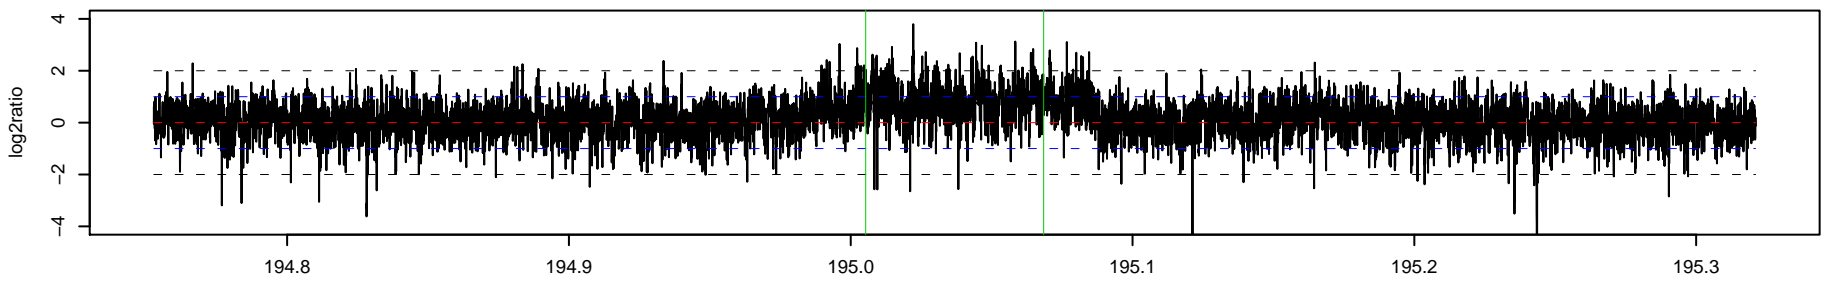

o

o

44 \_ AK1 Chr 1 : 197040280 – 197041762 , 1483 bp (aCGH relative log2ratio= 0.84 )

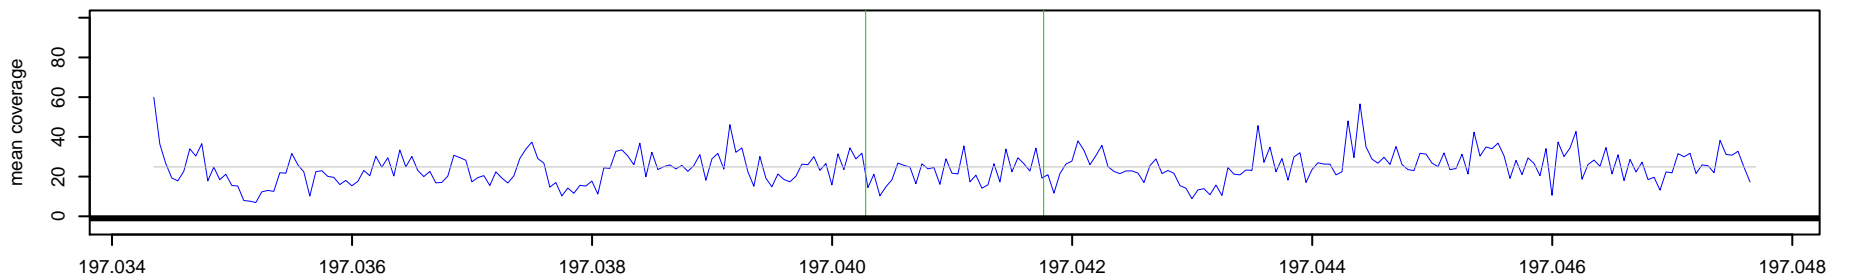

44 \_ NA10851 Chr 1 : 197040280 – 197041762 , 1483 bp (aCGH relative log2ratio= 0.84 )

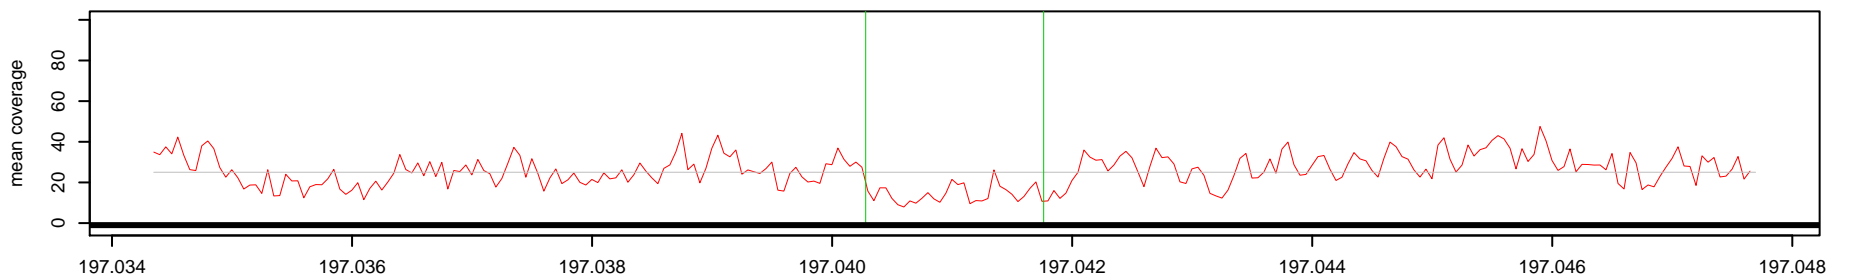

Log2( AK1 read depth / NA10851 read depth)

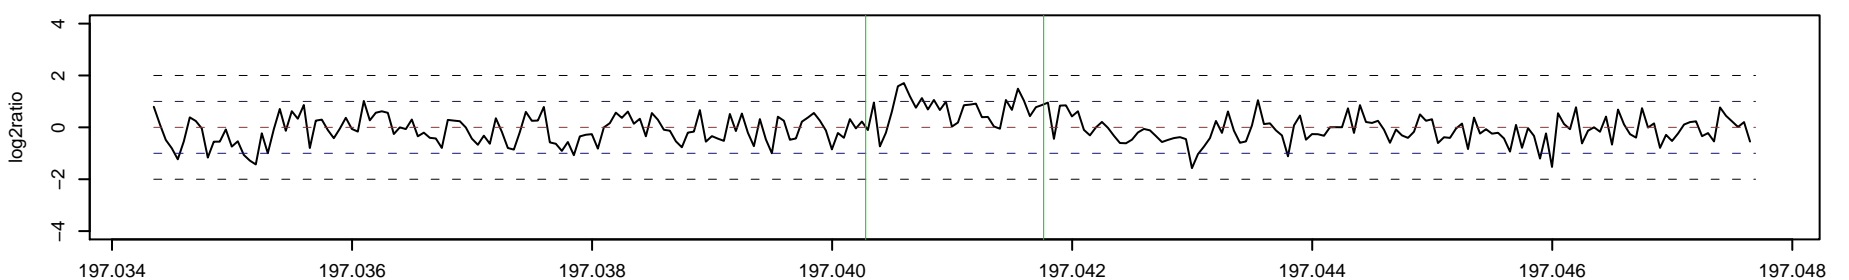

45\_AK1 Chr 1 : 208789026 – 208791483 , 2458 bp (aCGH relative log2ratio= 0.75 )

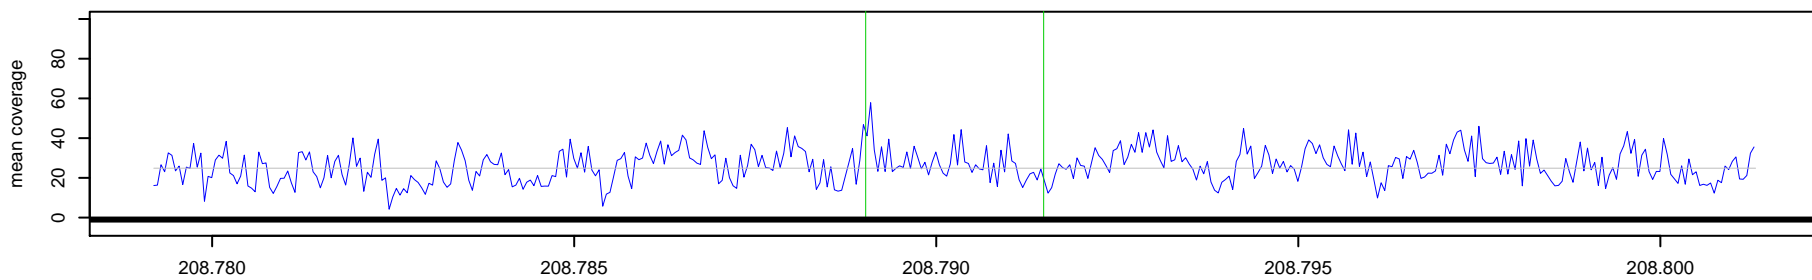

45\_NA10851 Chr 1 : 208789026 – 208791483 , 2458 bp (aCGH relative log2ratio= 0.75 )

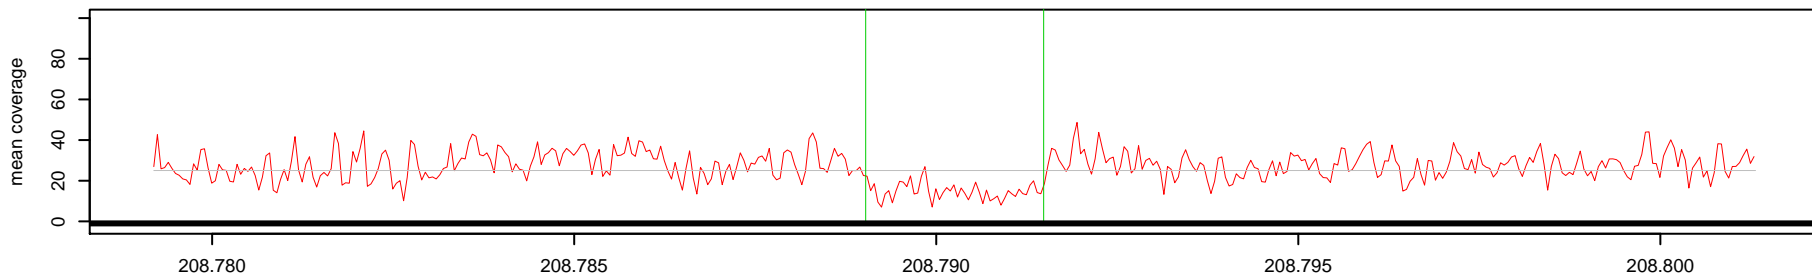

Log2( AK1 read depth / NA10851 read depth)

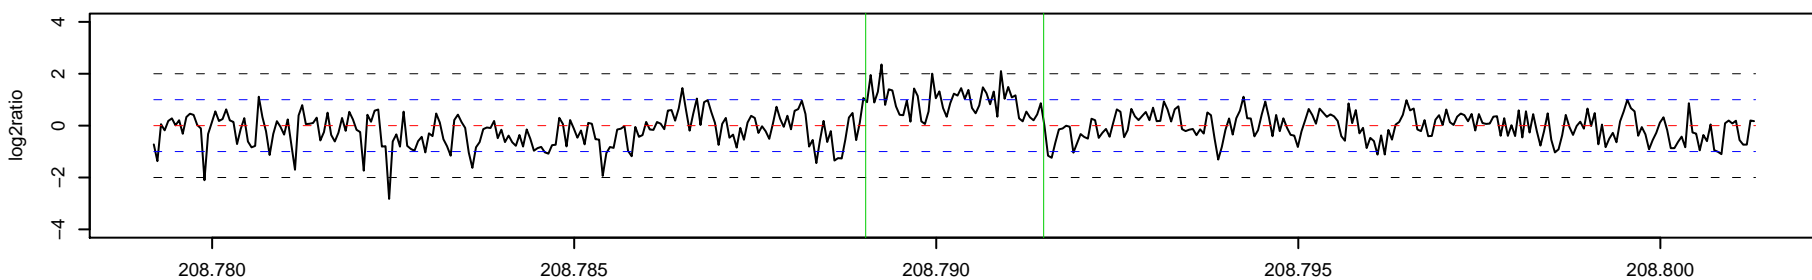

46\_AK1 Chr 1 : 220442838 – 220447812 , 4975 bp (aCGH relative log2ratio= 0.56 )

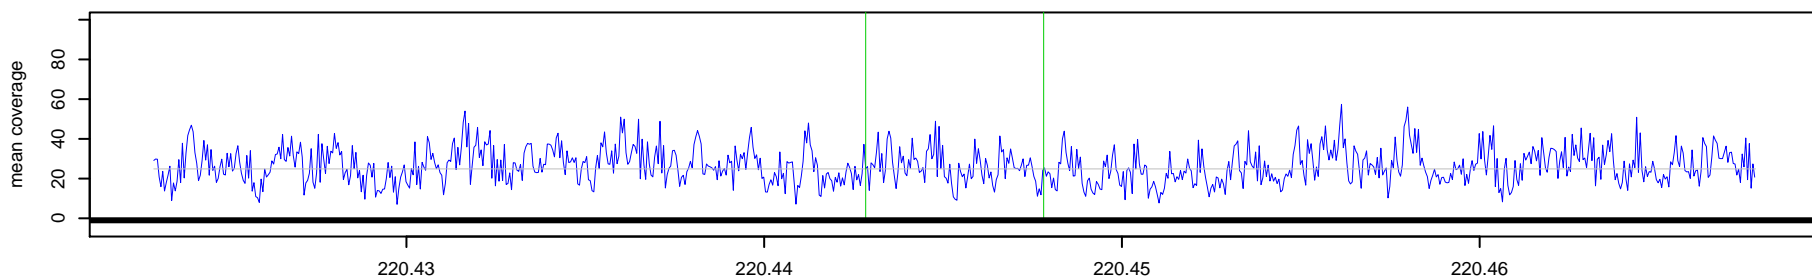

46\_NA10851 Chr 1 : 220442838 – 220447812 , 4975 bp (aCGH relative log2ratio= 0.56 )

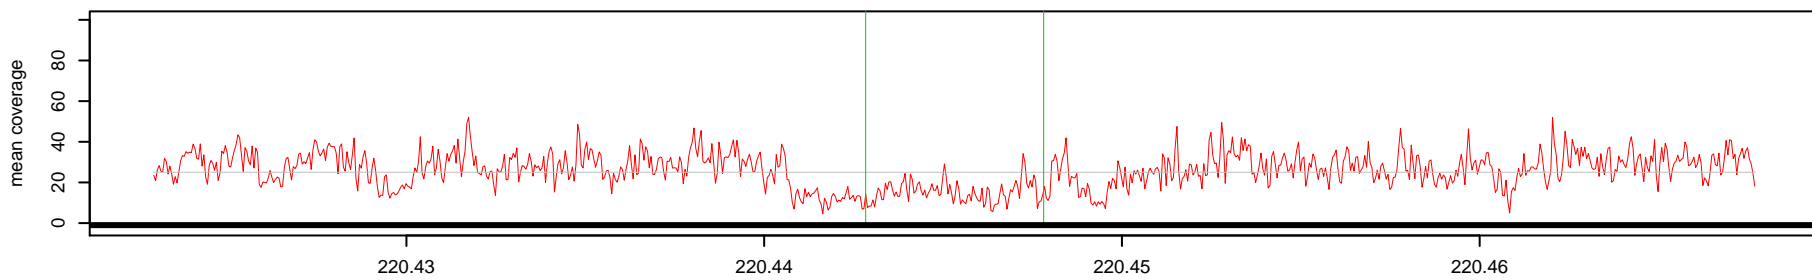

Log2( AK1 read depth / NA10851 read depth)

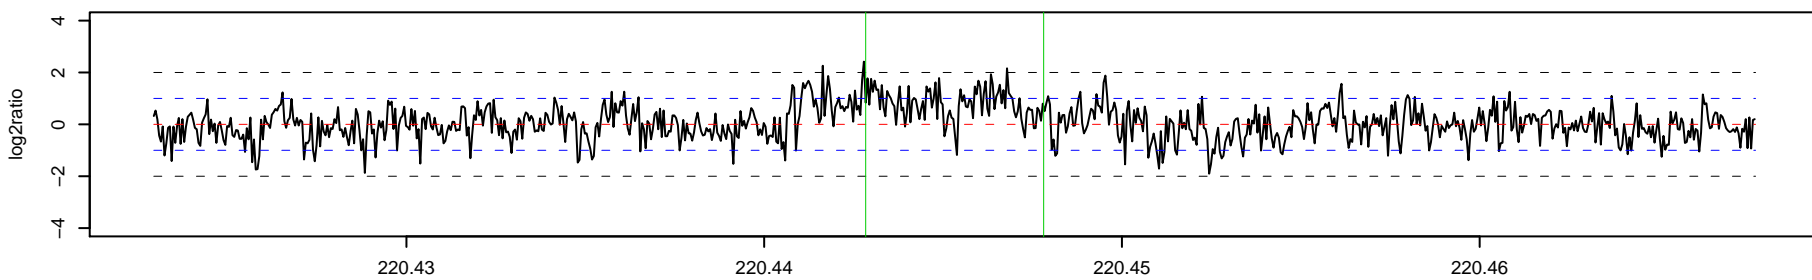

47\_AK1 Chr 1 : 223739859 – 223740572 , 714 bp (aCGH relative log2ratio= 0.65 )

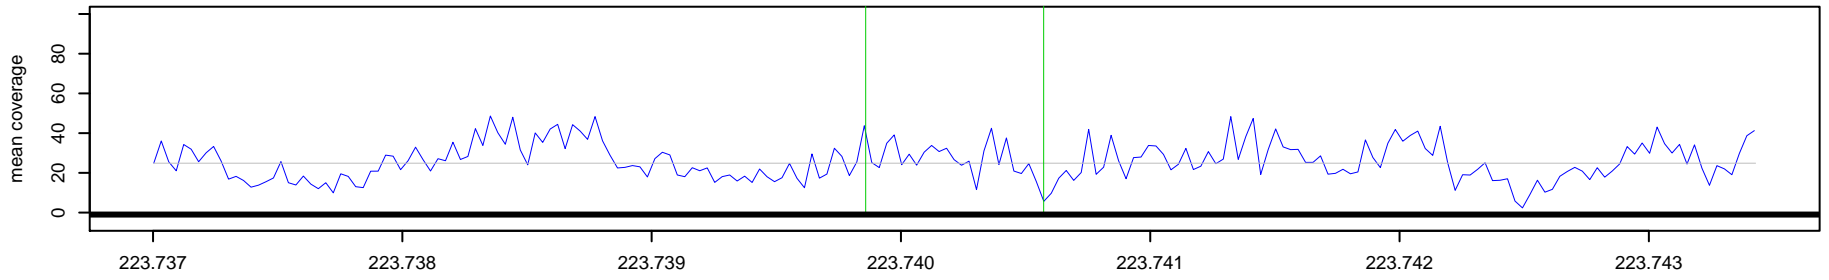

47\_NA10851 Chr 1 : 223739859 – 223740572 , 714 bp (aCGH relative log2ratio= 0.65 )

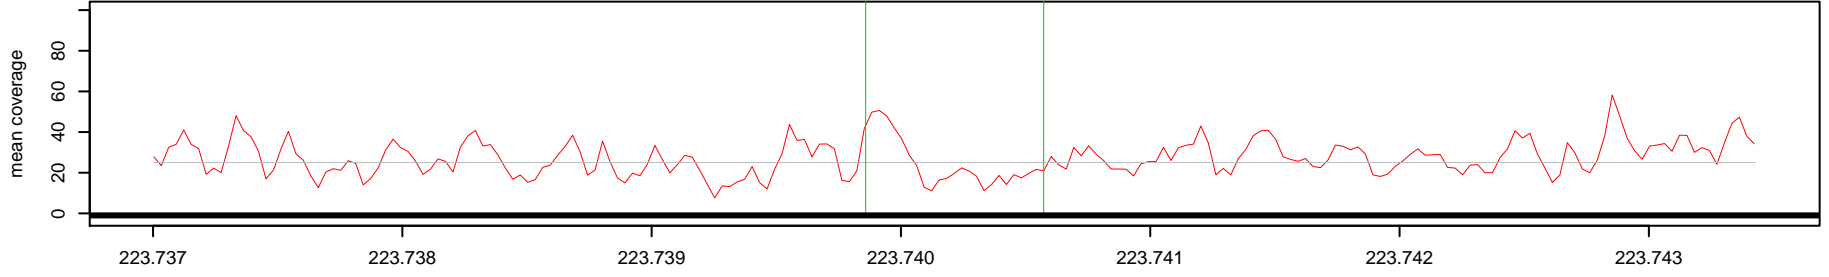

Log2( AK1 read depth / NA10851 read depth)

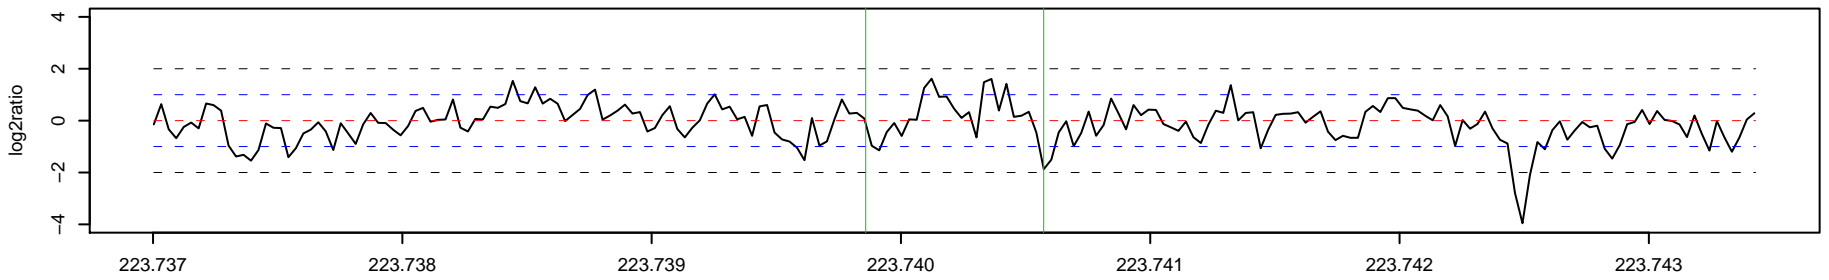

48\_AK1 Chr 1 : 227093631 – 227094515 , 885 bp (aCGH relative log2ratio= -1.18 )

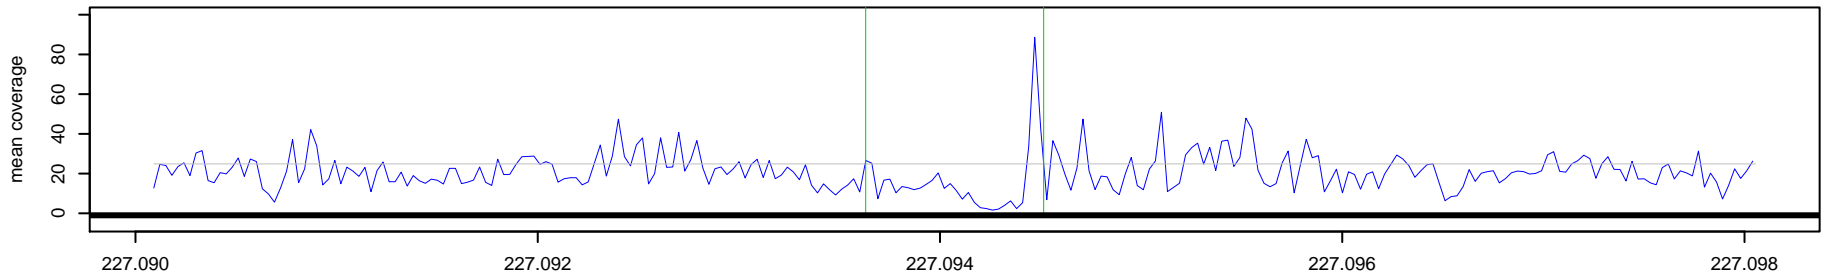

48\_NA10851 Chr 1 : 227093631 – 227094515 , 885 bp (aCGH relative log2ratio= -1.18 )

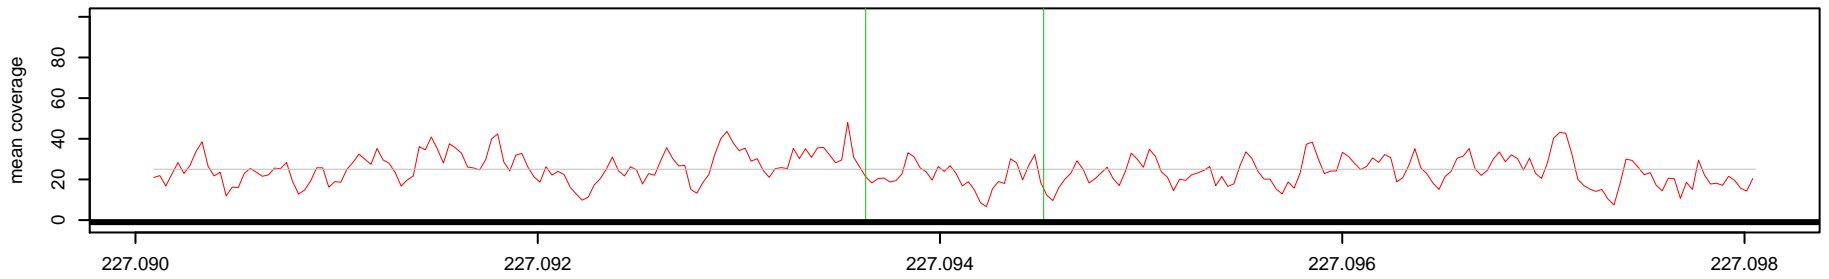

Log2( AK1 read depth / NA10851 read depth)

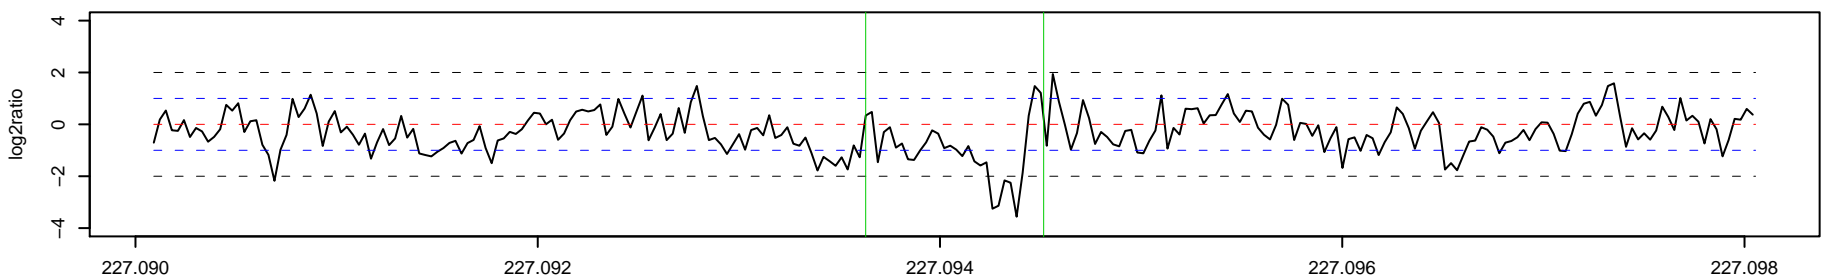

49\_AK1 Chr 1 : 227879126 – 227882708 , 3583 bp (aCGH relative log2ratio= -4.56 )

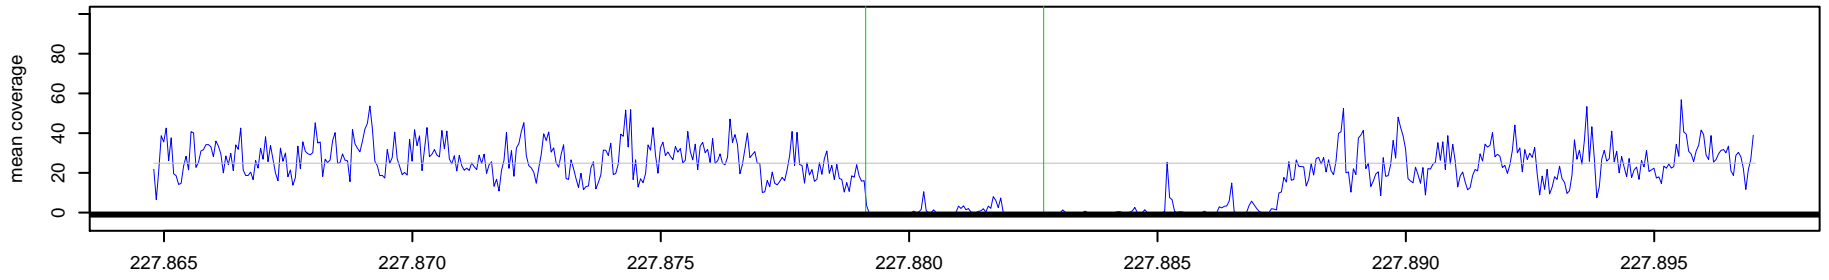

49\_NA10851 Chr 1 : 227879126 – 227882708 , 3583 bp (aCGH relative log2ratio= -4.56 )

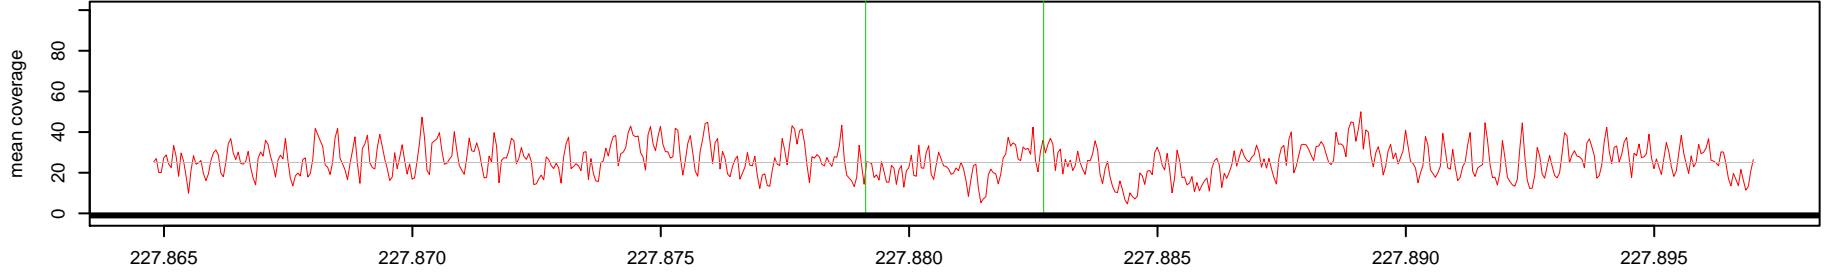

Log2( AK1 read depth / NA10851 read depth)

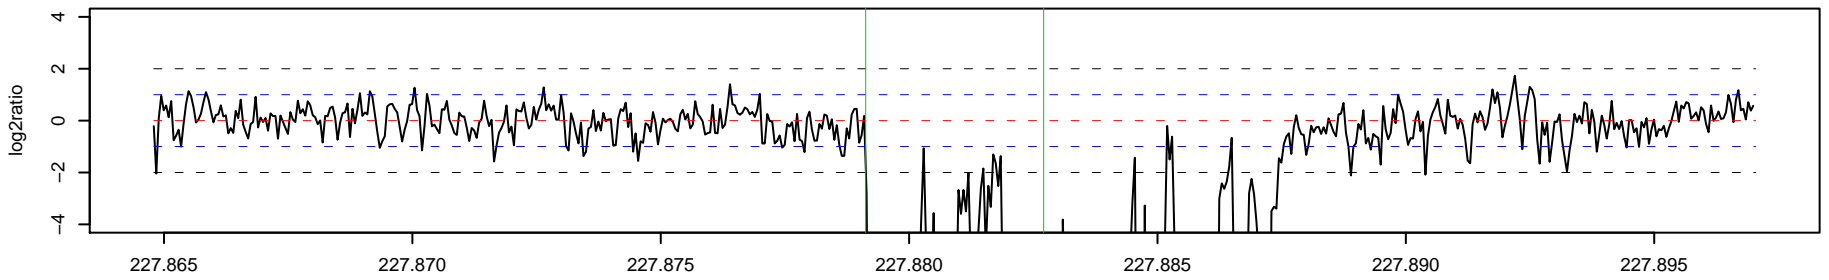

50\_AK1 Chr 1 : 231464897 – 231465732 , 836 bp (aCGH relative log2ratio= 0.28 )

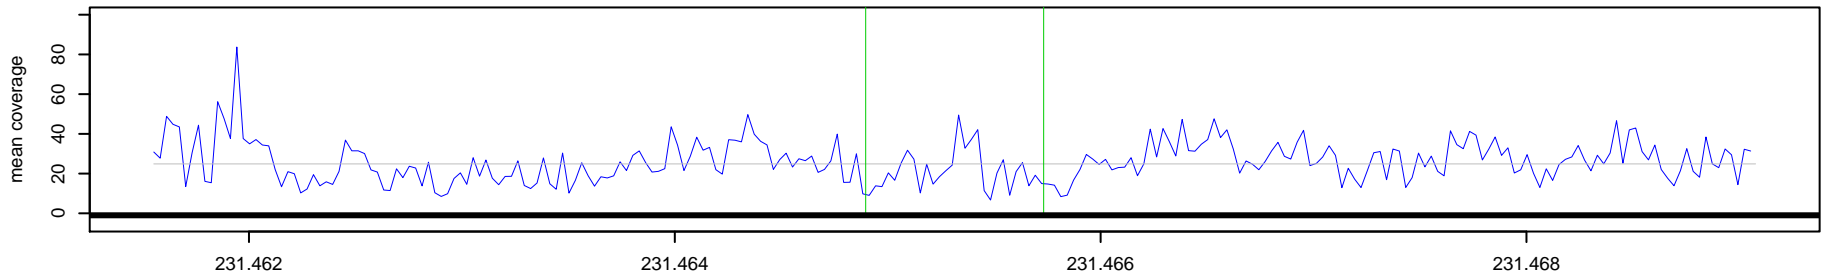

50\_NA10851 Chr 1 : 231464897 – 231465732 , 836 bp (aCGH relative log2ratio= 0.28 )

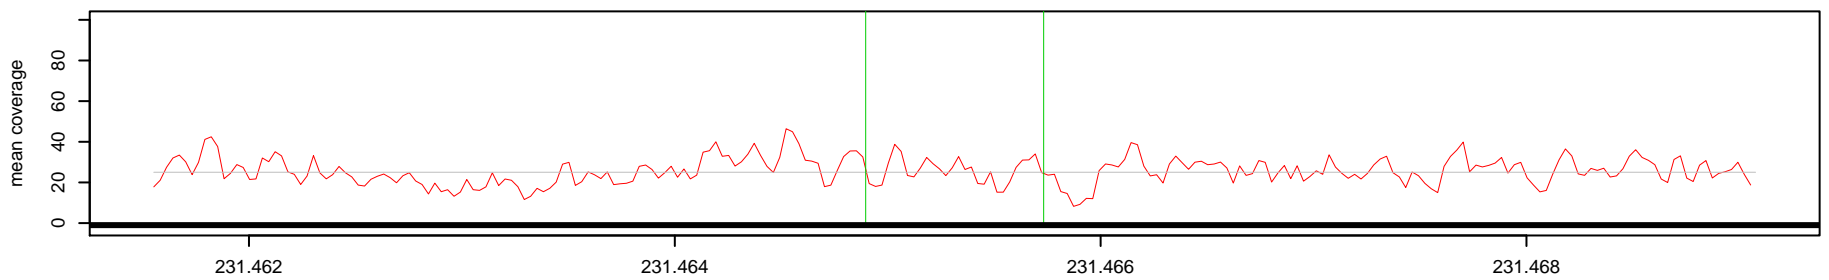

Log2( AK1 read depth / NA10851 read depth)

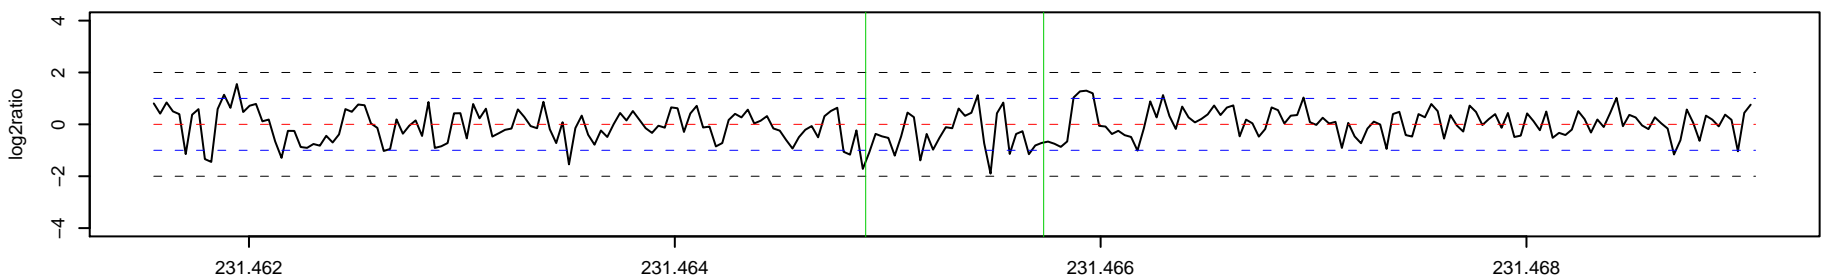

51 \_ AK1 Chr 1 : 232385486 – 232386200 , 715 bp (aCGH relative log2ratio= -4.35 )

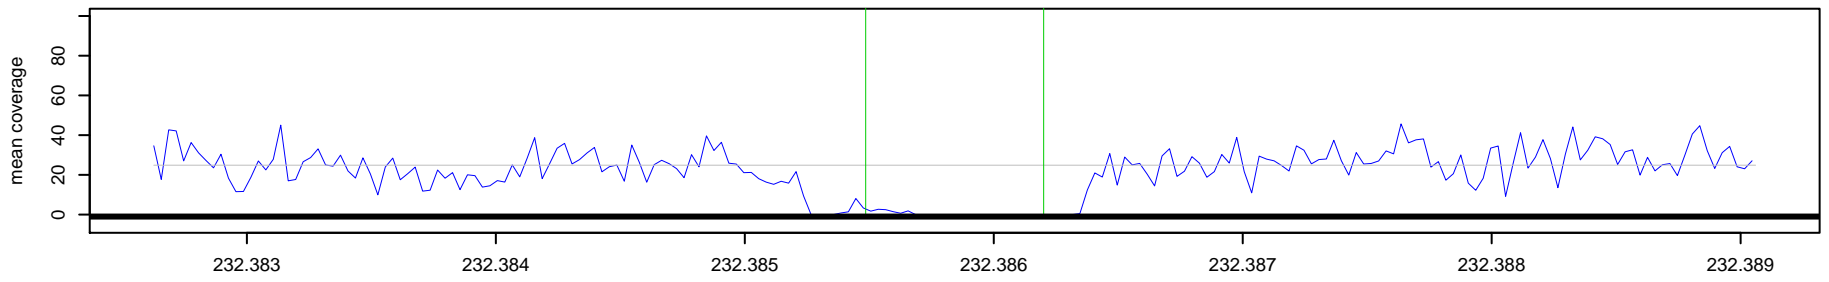

51 \_ NA10851 Chr 1 : 232385486 – 232386200 , 715 bp (aCGH relative log2ratio= -4.35 )

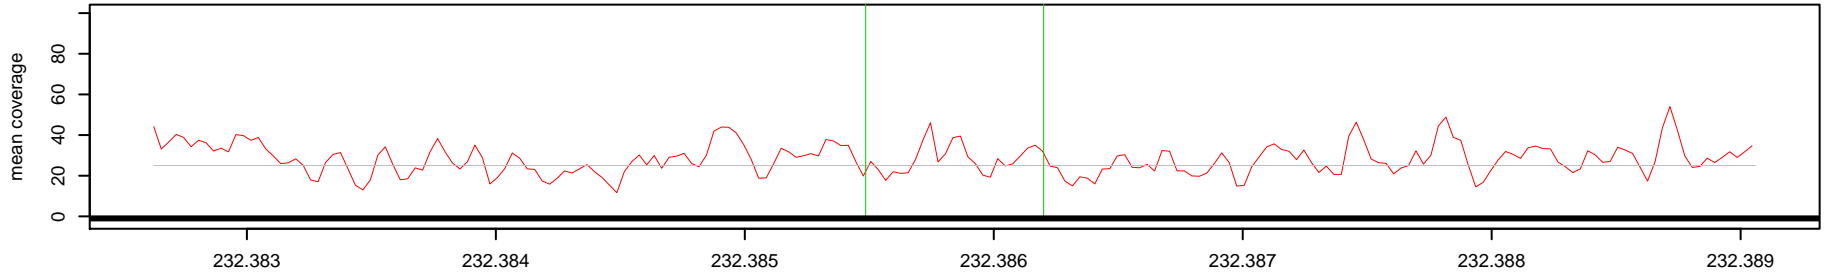

Log2( AK1 read depth / NA10851 read depth)

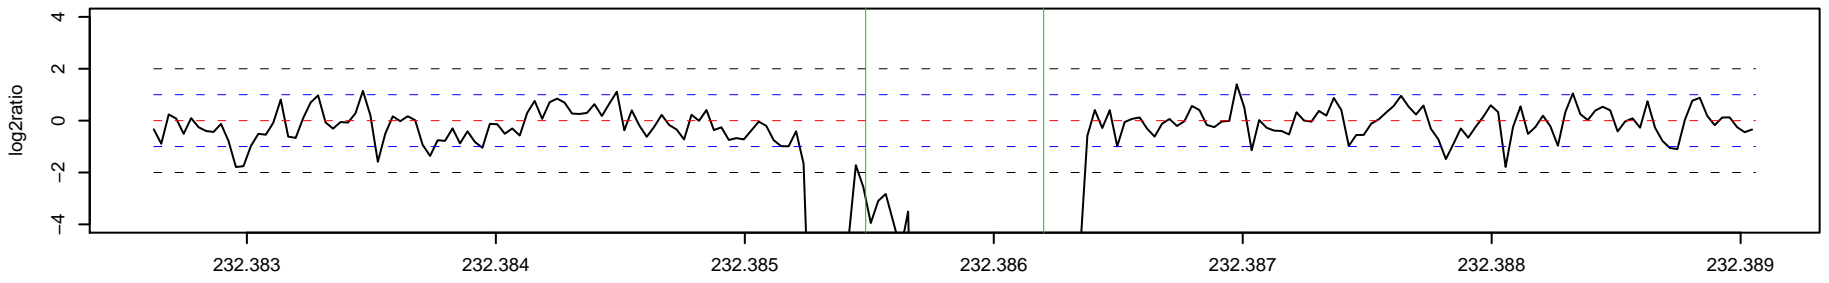

o

o

52 \_ AK1 Chr 1 : 242813258 – 242816923 , 3666 bp (aCGH relative log2ratio= -0.29 )

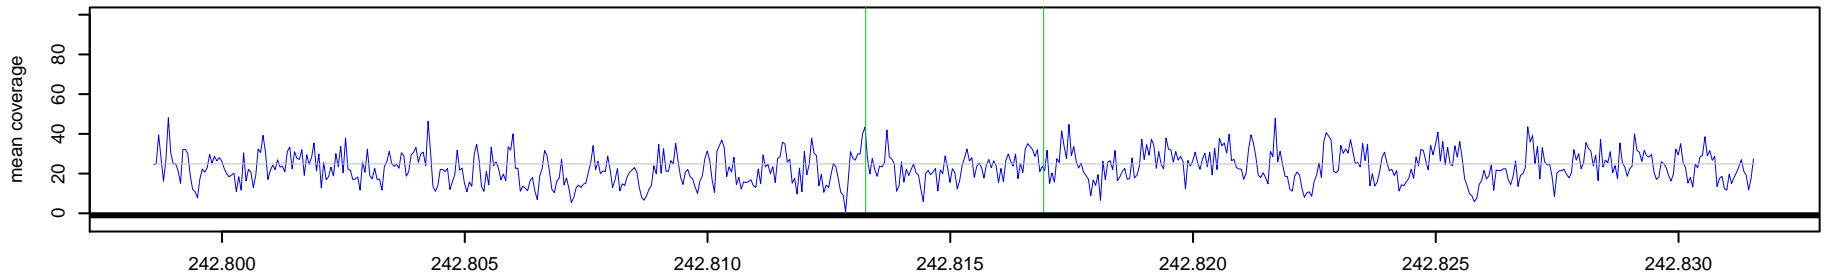

52 \_ NA10851 Chr 1 : 242813258 – 242816923 , 3666 bp (aCGH relative log2ratio= -0.29 )

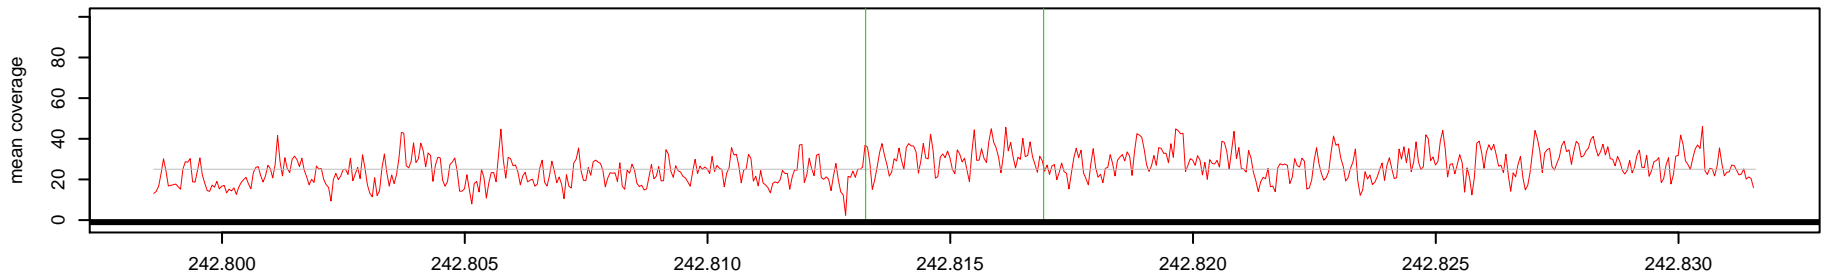

Log2( AK1 read depth / NA10851 read depth)

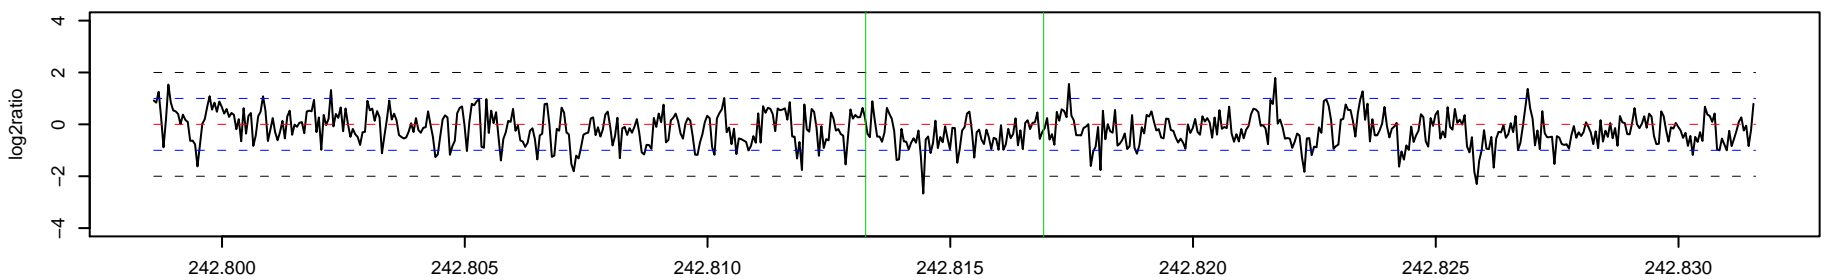

53\_AK1 Chr 2 : 3576885 - 3585751 , 8867 bp (aCGH relative log2ratio= 0.54 )

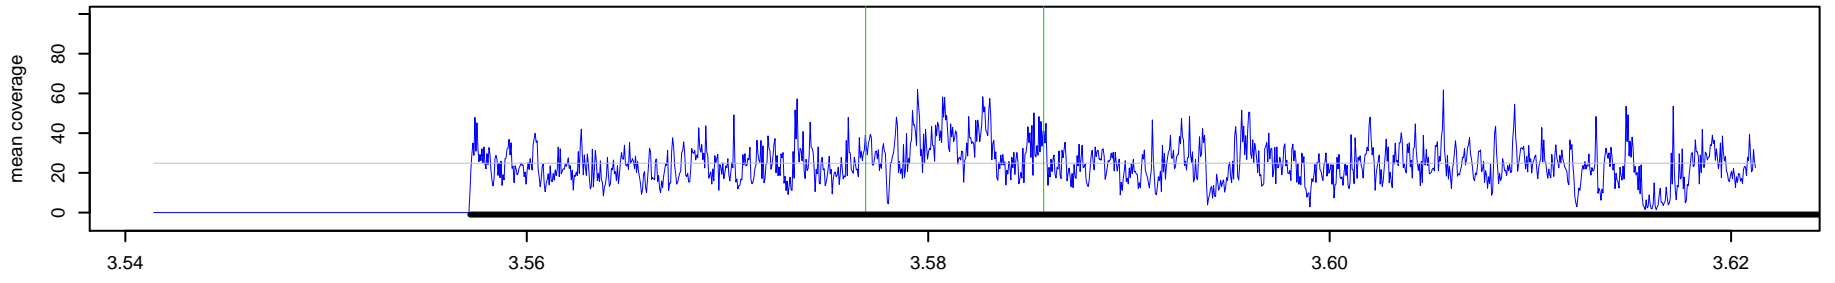

53\_NA10851 Chr 2 : 3576885 - 3585751 , 8867 bp (aCGH relative log2ratio= 0.54 )

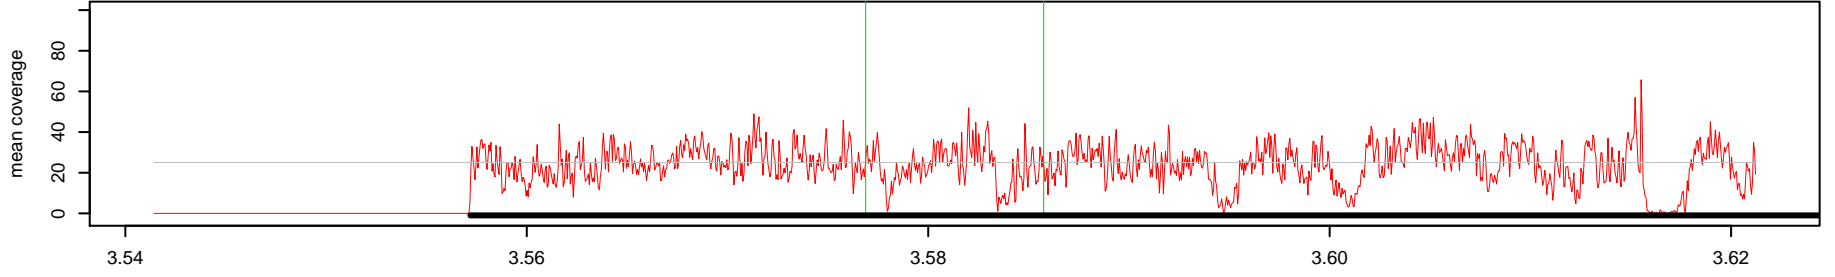

Log2( AK1 read depth / NA10851 read depth)

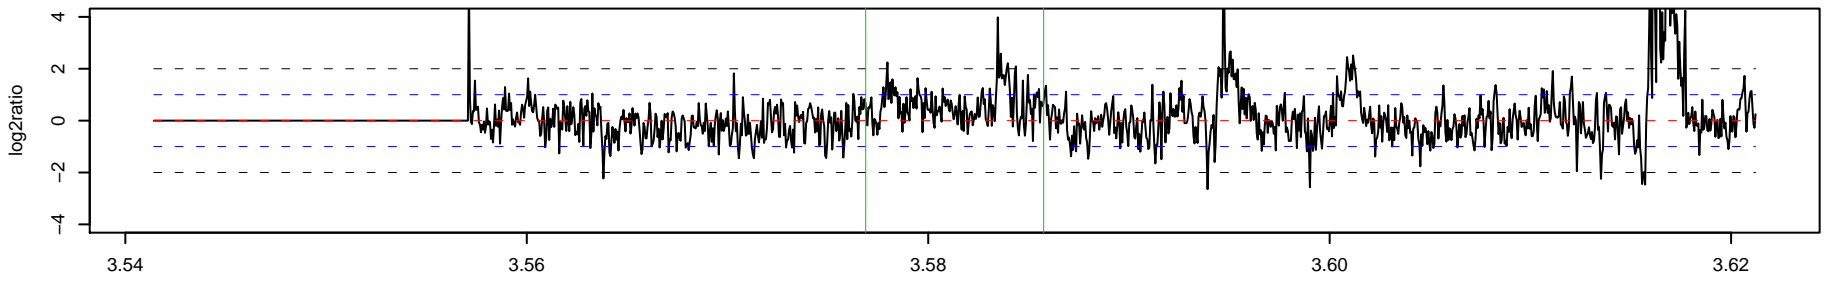

54\_AK1 Chr 2 : 3579745 - 3580244 , 500 bp (aCGH relative log2ratio= 1.03 )

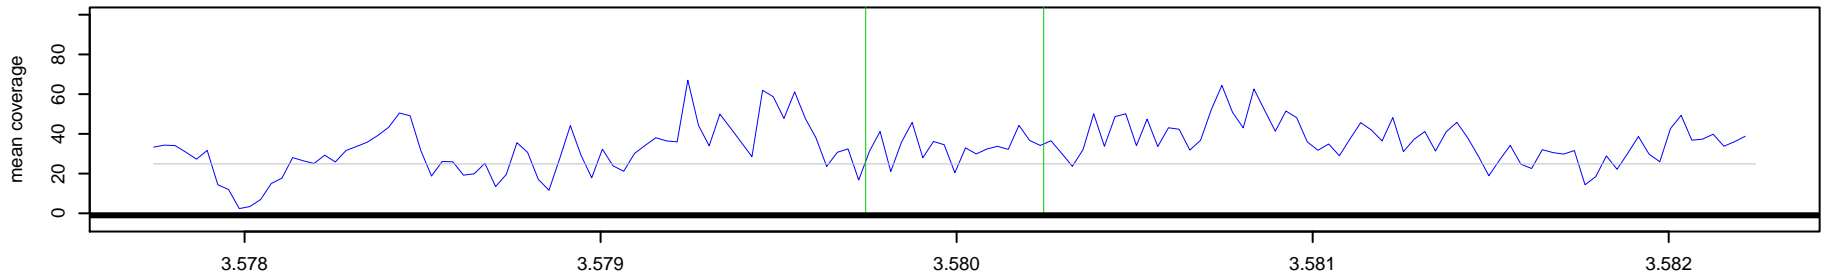

54\_NA10851 Chr 2 : 3579745 - 3580244 , 500 bp (aCGH relative log2ratio= 1.03 )

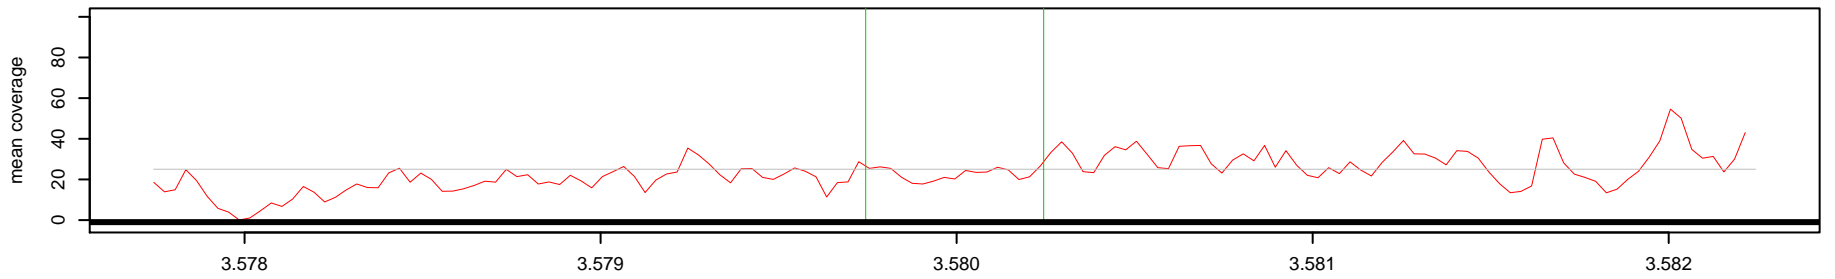

Log2( AK1 read depth / NA10851 read depth)

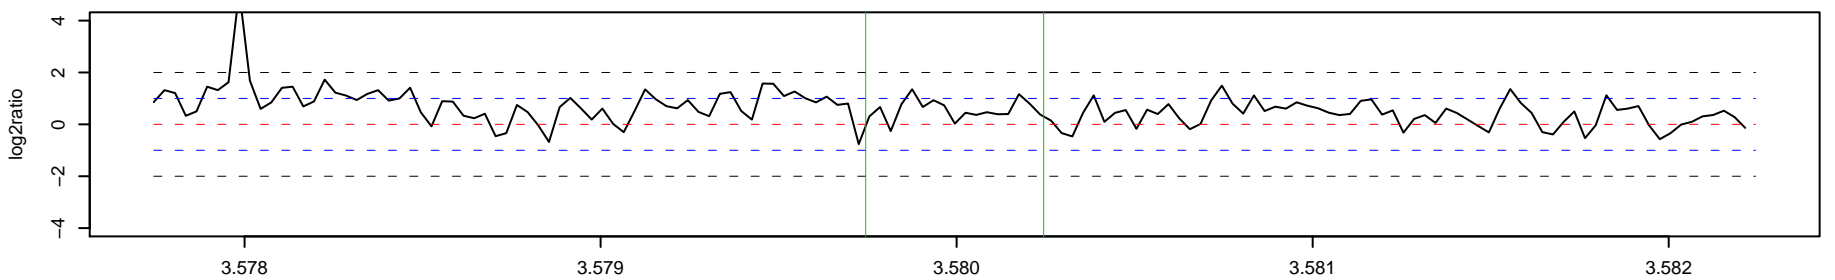

55\_AK1 Chr 2 : 6318071 - 6319369 , 1299 bp (aCGH relative log2ratio= 0.77 )

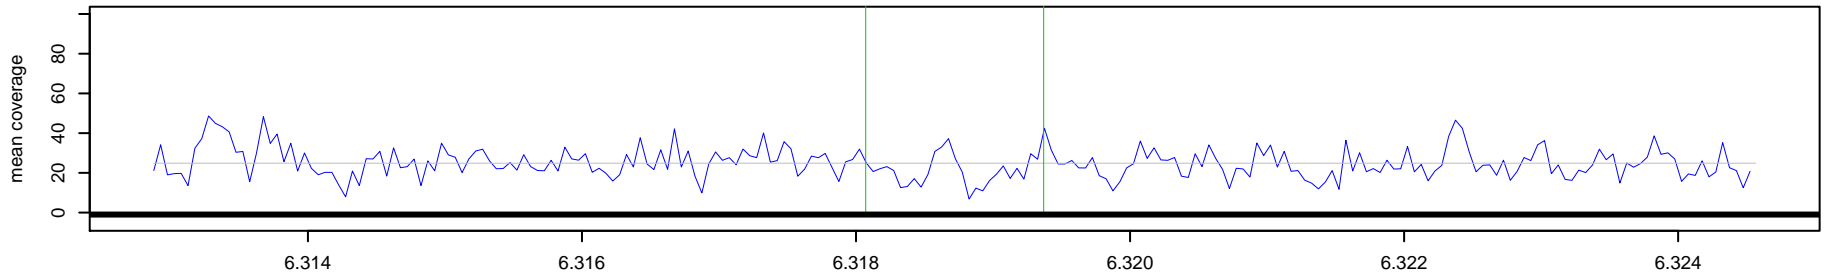

55\_NA10851 Chr 2 : 6318071 - 6319369 , 1299 bp (aCGH relative log2ratio= 0.77 )

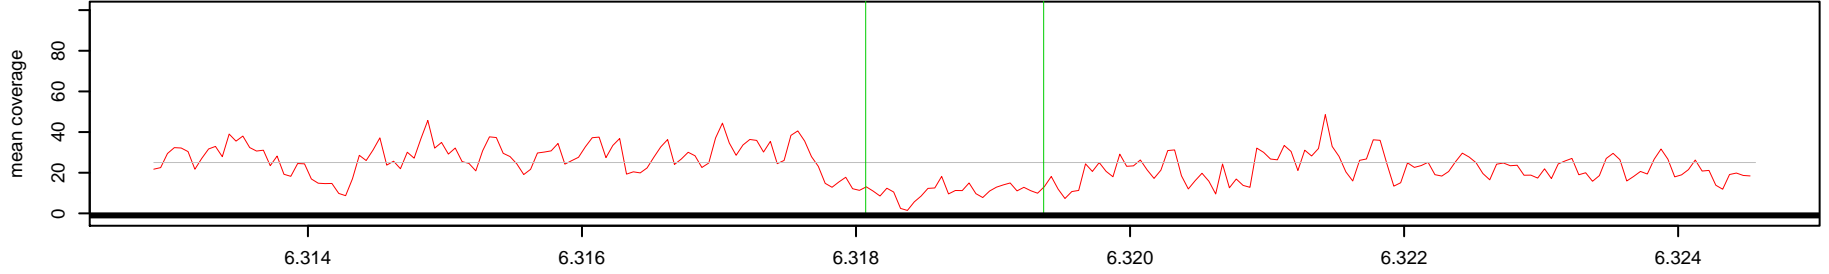

Log2( AK1 read depth / NA10851 read depth)

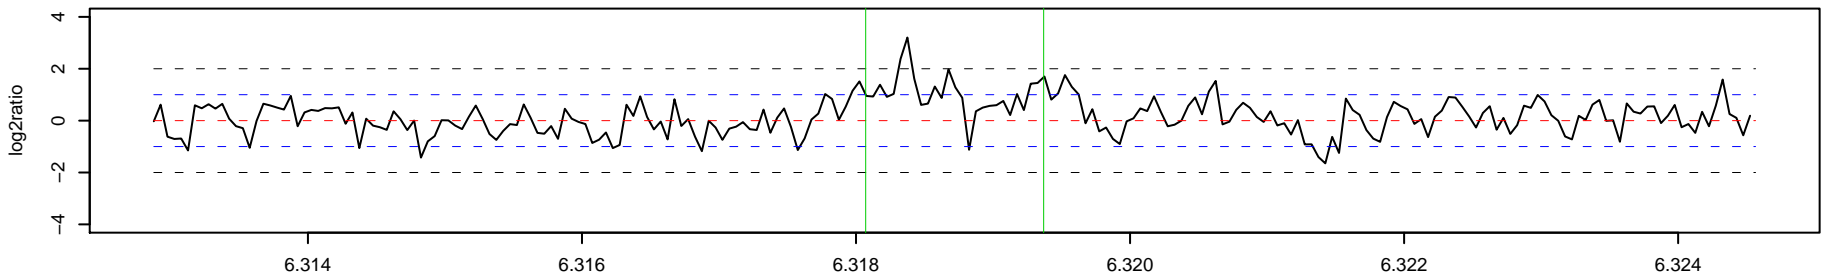

56\_AK1 Chr 2 : 11937310 - 11938770 , 1461 bp (aCGH relative log2ratio= 0.65 )

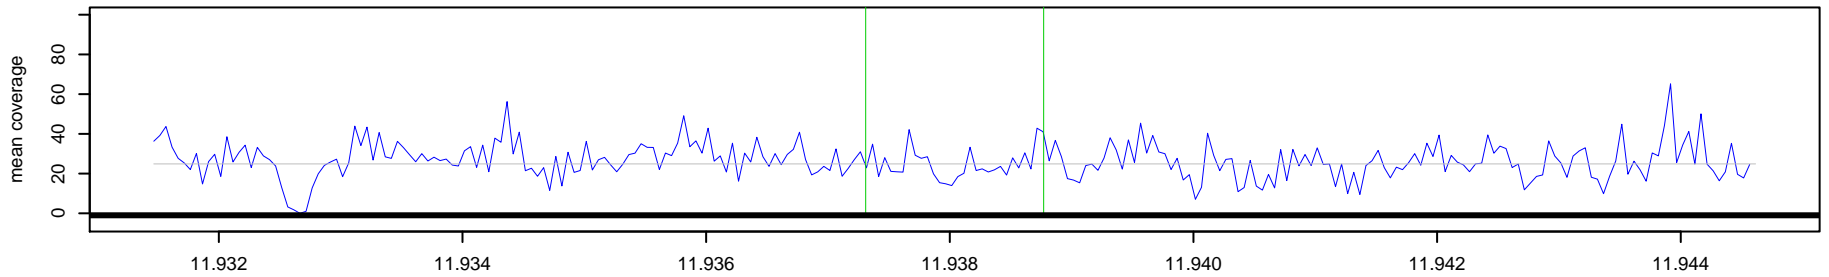

56\_NA10851 Chr 2 : 11937310 - 11938770 , 1461 bp (aCGH relative log2ratio= 0.65 )

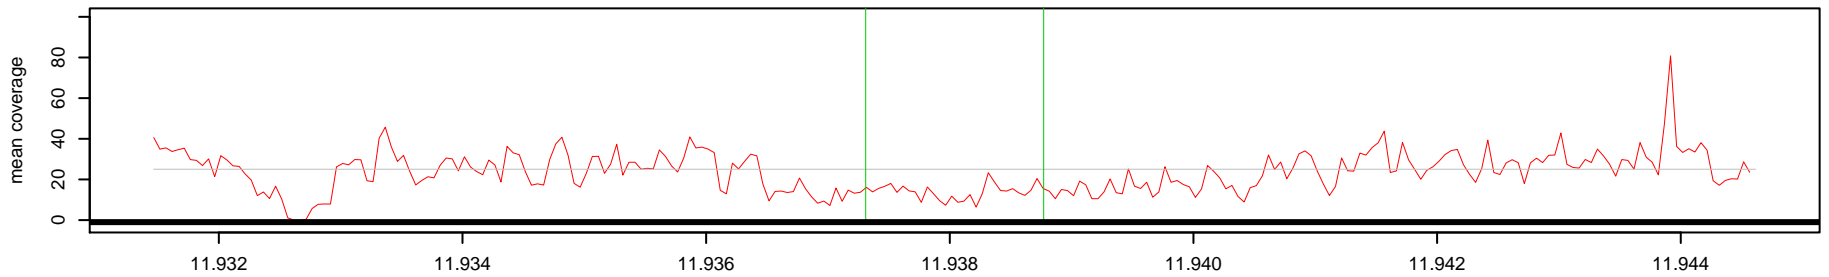

Log2( AK1 read depth / NA10851 read depth)

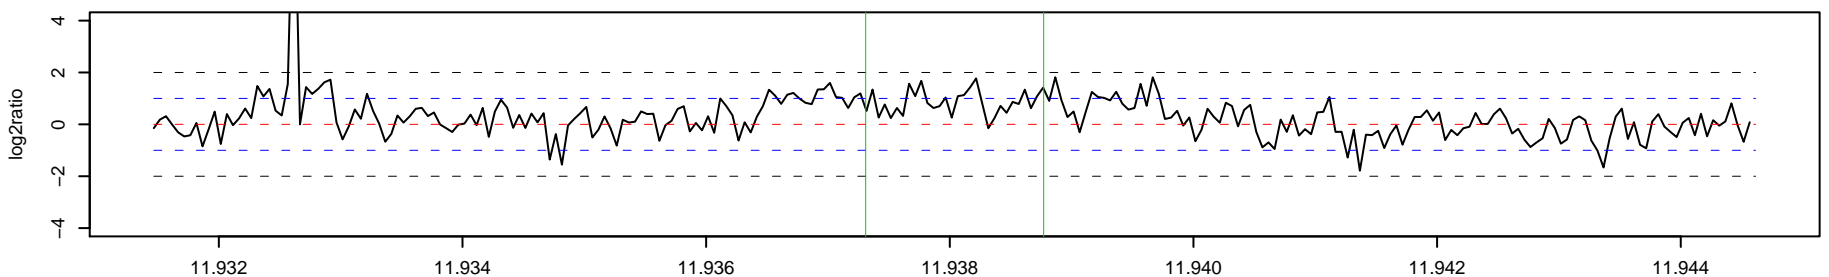



57\_AK1 Chr 2 : 13429871 - 13472349 , 42479 bp (aCGH relative log2ratio= 0.39 )

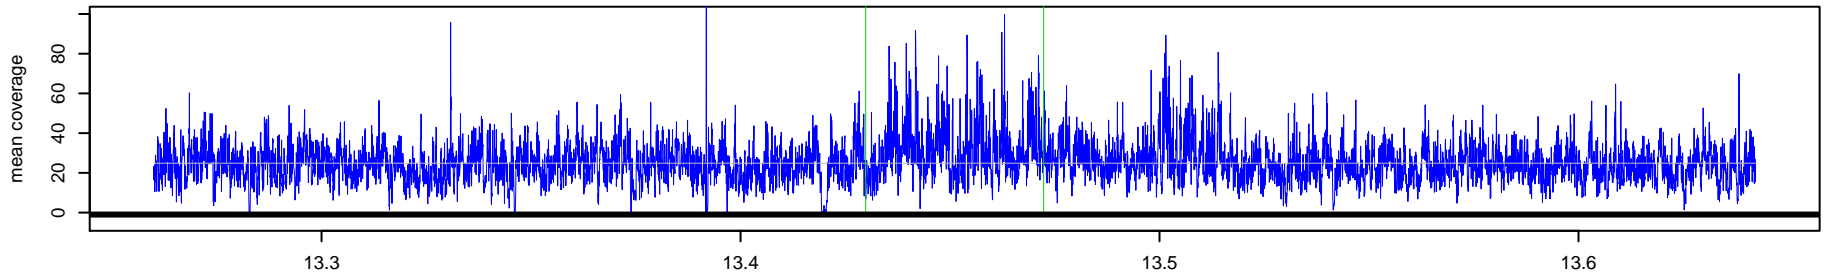

57\_NA10851 Chr 2 : 13429871 - 13472349 , 42479 bp (aCGH relative log2ratio= 0.39 )

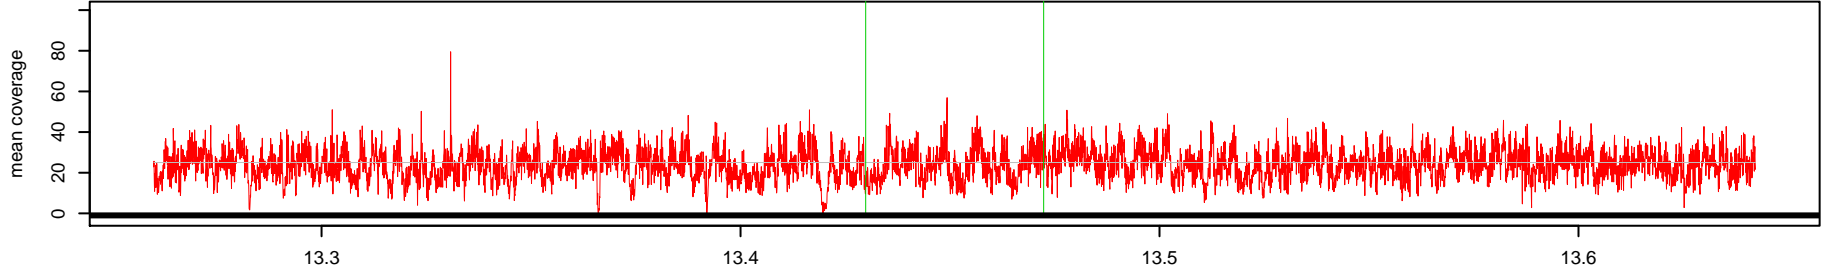

Log2( AK1 read depth / NA10851 read depth)

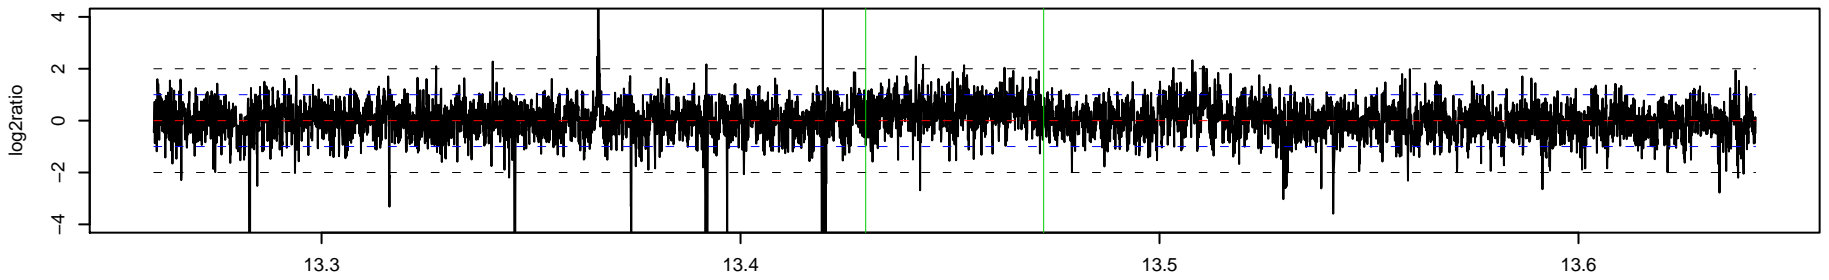

58\_AK1 Chr 2 : 13501961 - 13514712 , 12752 bp (aCGH relative log2ratio= 0.57 )

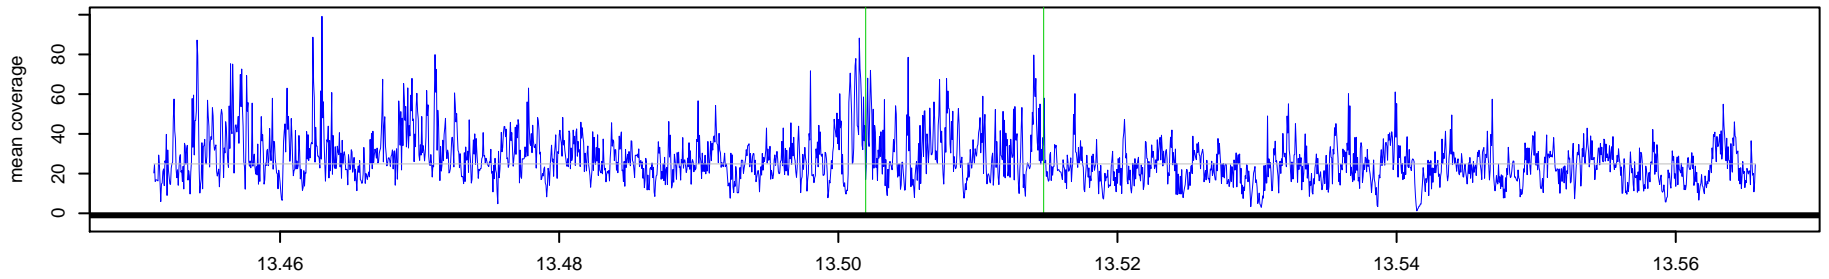

58\_NA10851 Chr 2 : 13501961 - 13514712 , 12752 bp (aCGH relative log2ratio= 0.57 )

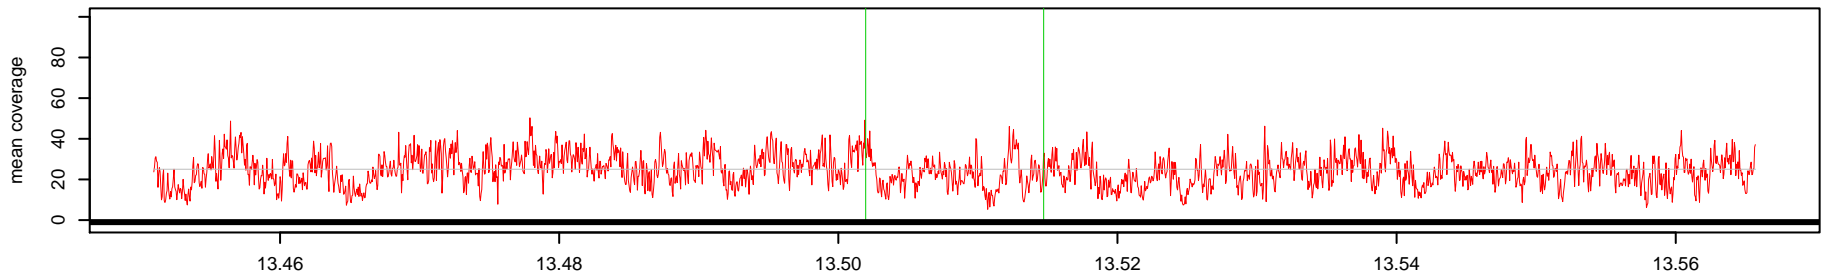

Log2( AK1 read depth / NA10851 read depth)

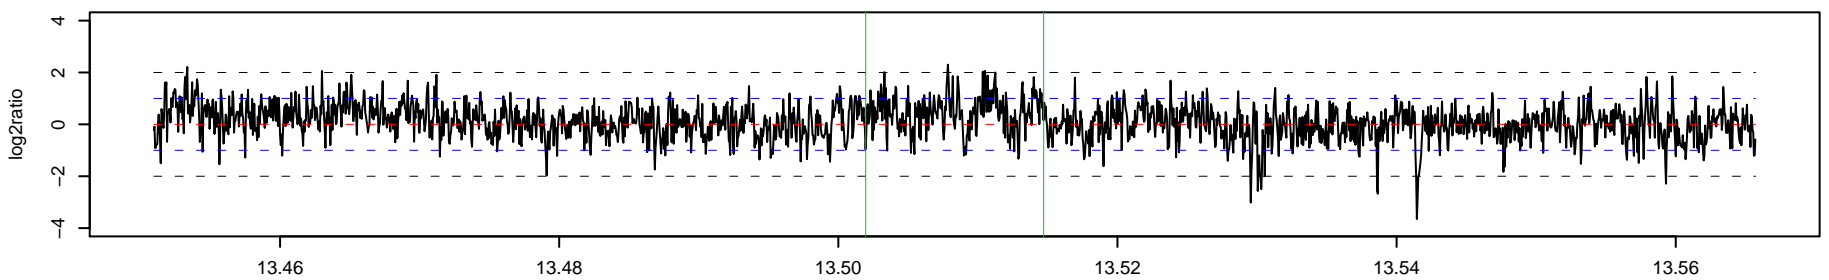

59\_AK1 Chr 2 : 15437367 – 15438197 , 831 bp (aCGH relative log2ratio= 0.59)

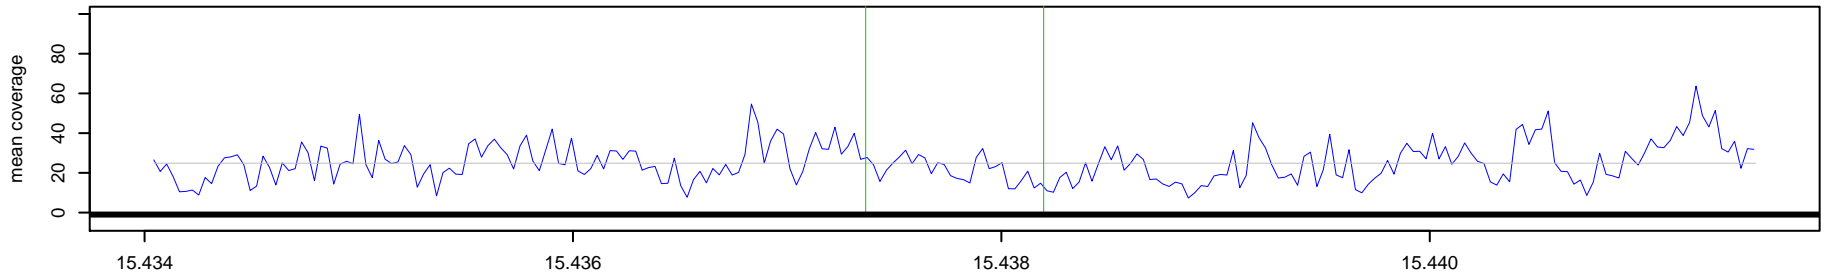

59\_NA10851 Chr 2 : 15437367 – 15438197 , 831 bp (aCGH relative log2ratio= 0.59)

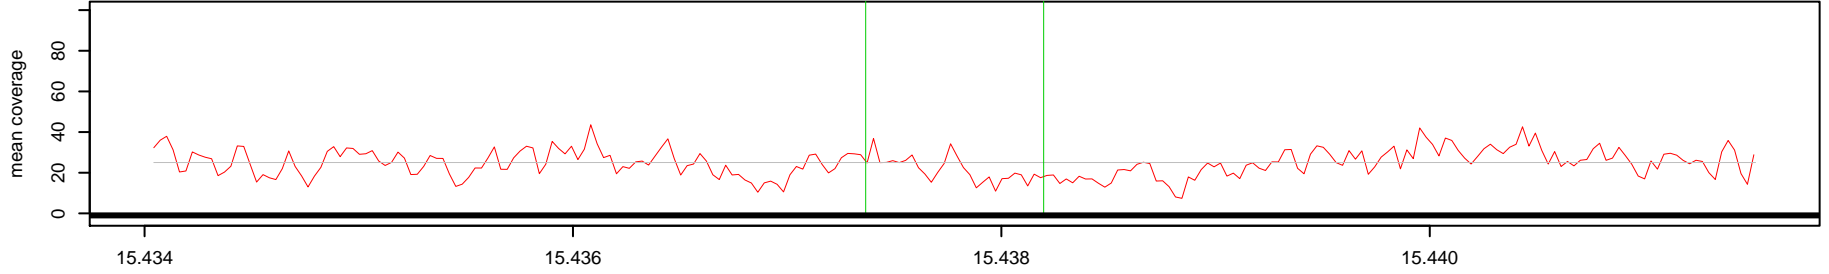

Log2( AK1 read depth / NA10851 read depth)

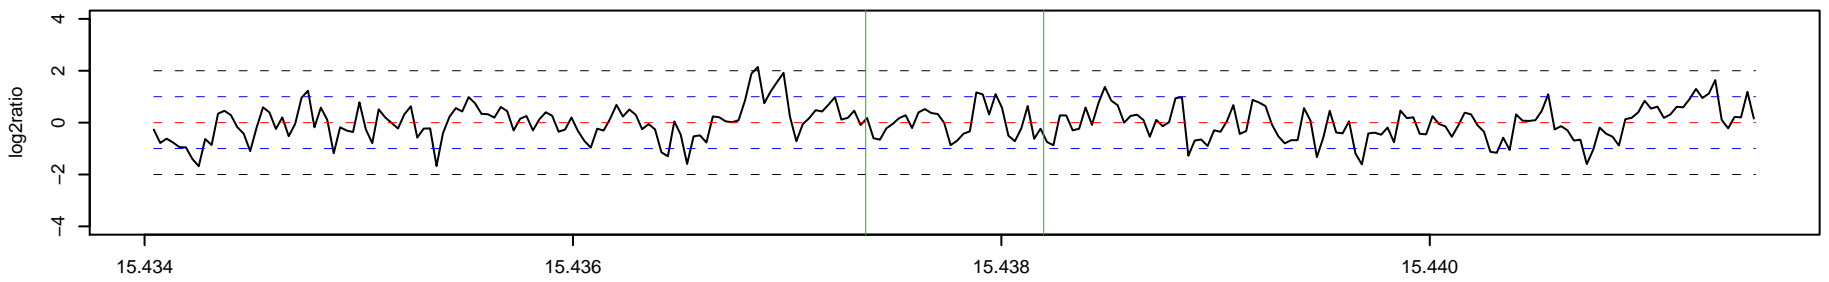

60\_AK1 Chr 2 : 18866355 – 18866836 , 482 bp (aCGH relative log2ratio= -3.55)

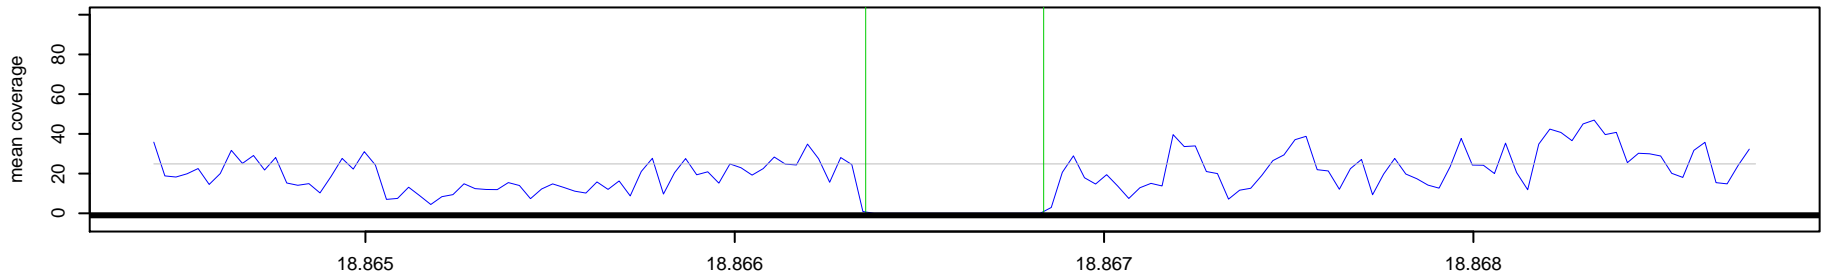

60\_NA10851 Chr 2 : 18866355 – 18866836 , 482 bp (aCGH relative log2ratio= -3.55)

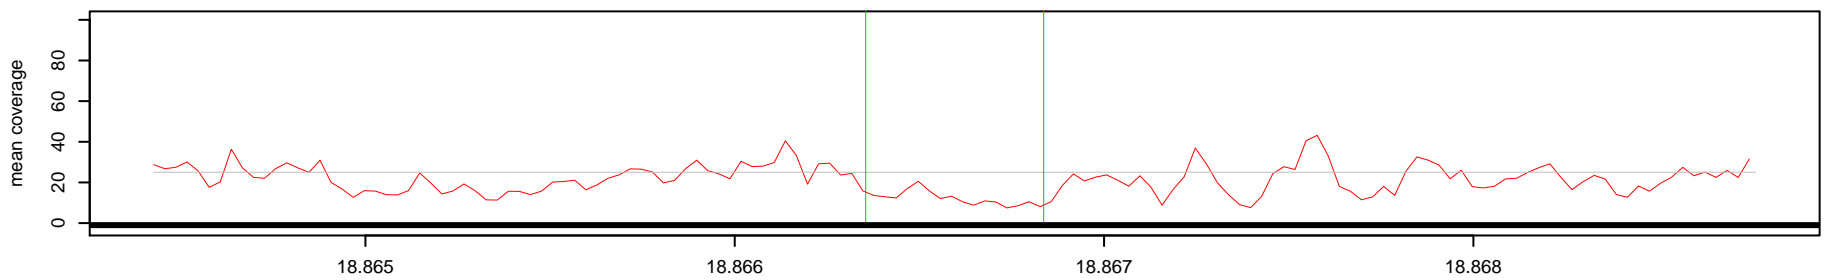

Log2( AK1 read depth / NA10851 read depth)

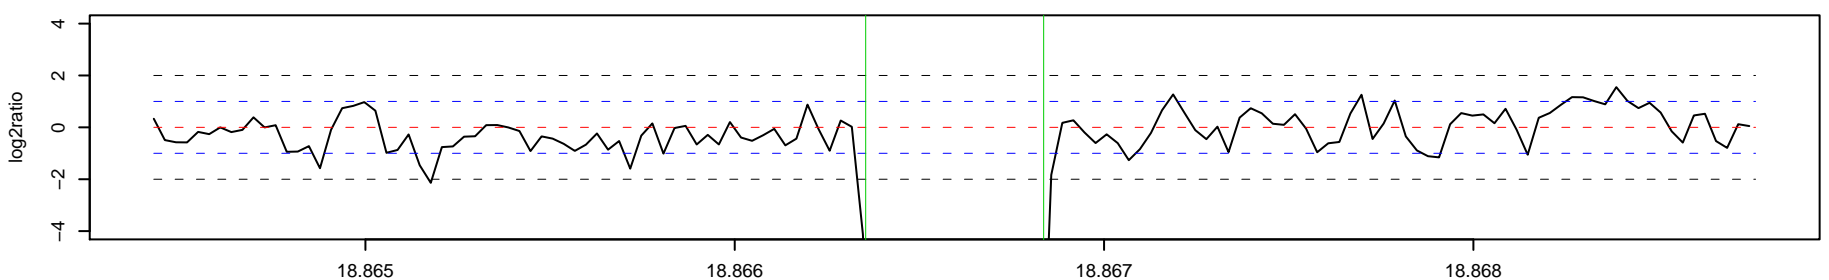

61\_AK1 Chr 2 : 19631033 – 19634064 , 3032 bp (aCGH relative log2ratio= 0.73 )

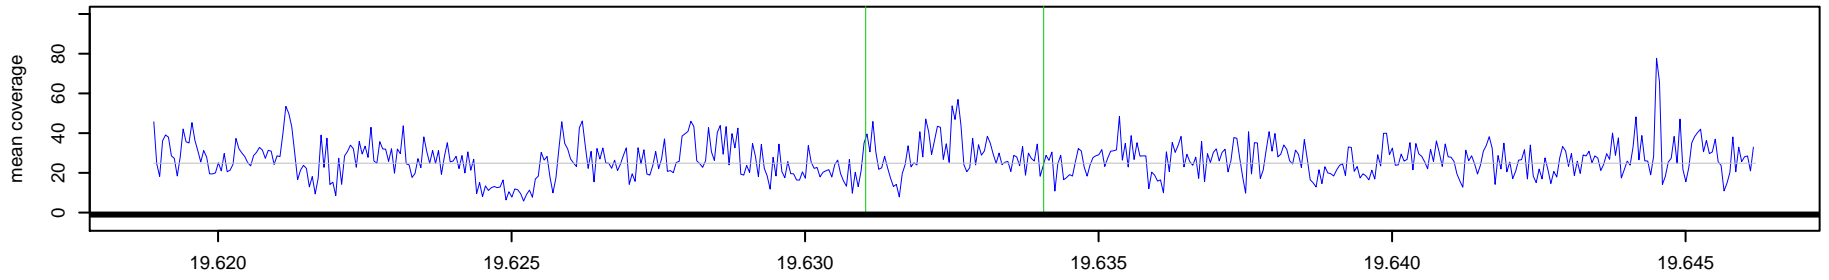

61\_NA10851 Chr 2 : 19631033 – 19634064 , 3032 bp (aCGH relative log2ratio= 0.73 )

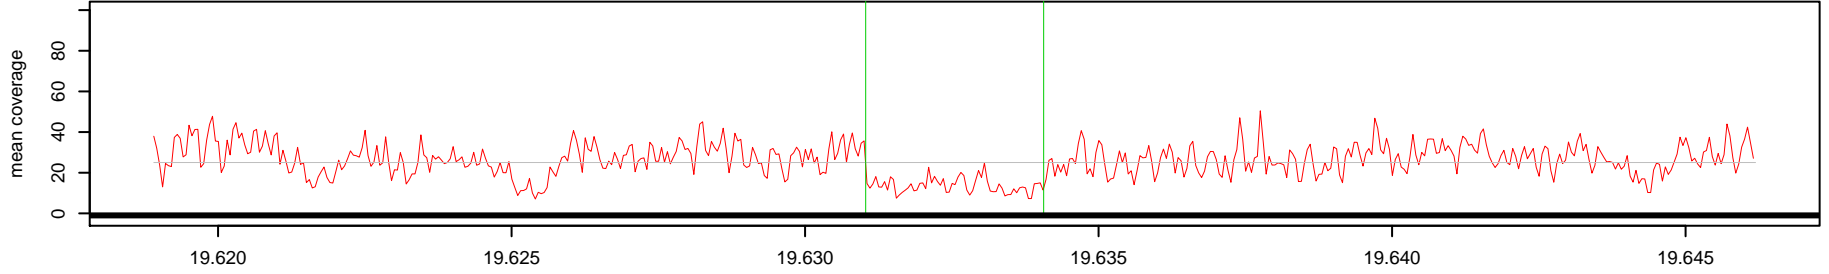

Log2( AK1 read depth / NA10851 read depth)

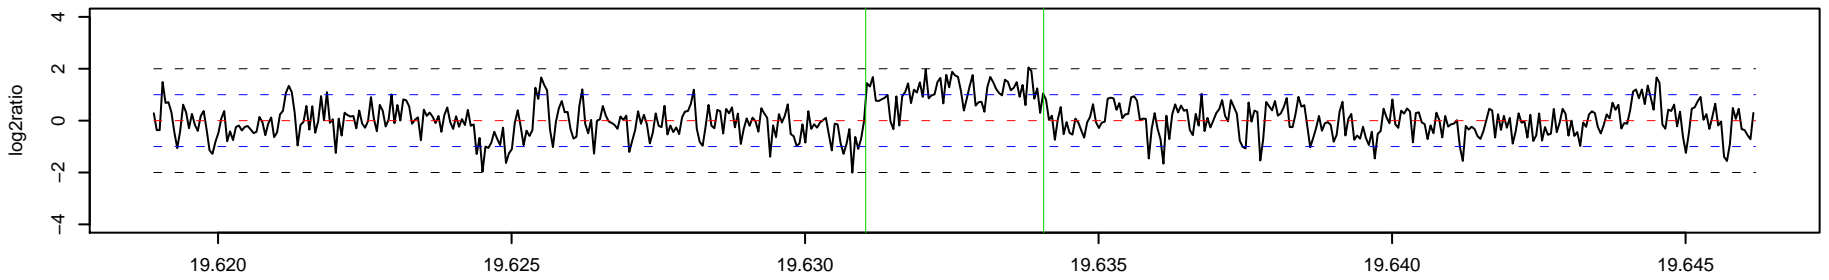

62\_AK1 Chr 2 : 22125843 – 22948435 , 822593 bp (aCGH relative log2ratio= 0.82 )

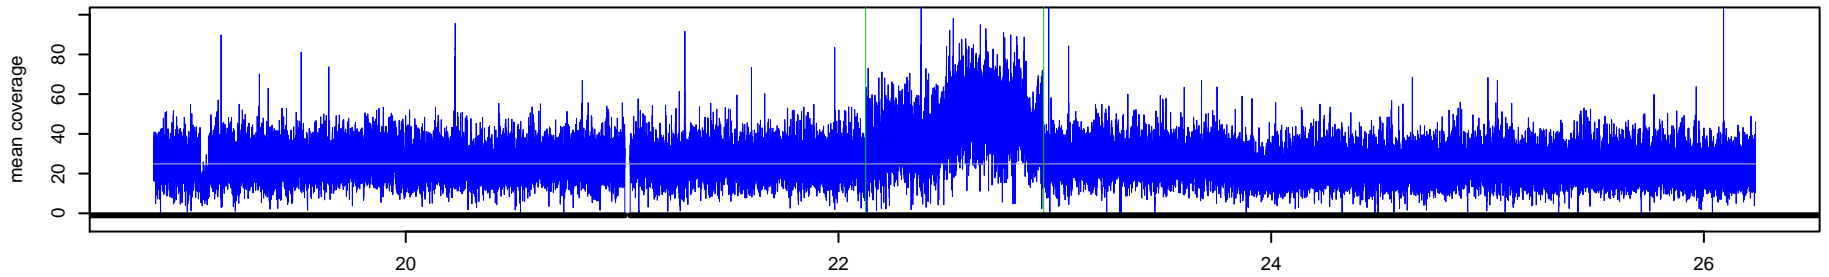

62\_NA10851 Chr 2 : 22125843 – 22948435 , 822593 bp (aCGH relative log2ratio= 0.82 )

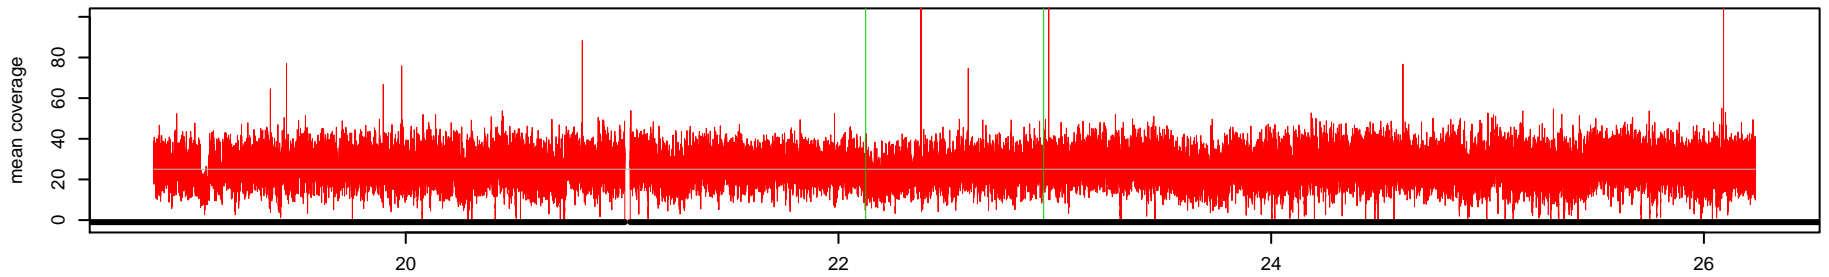

Log2( AK1 read depth / NA10851 read depth)

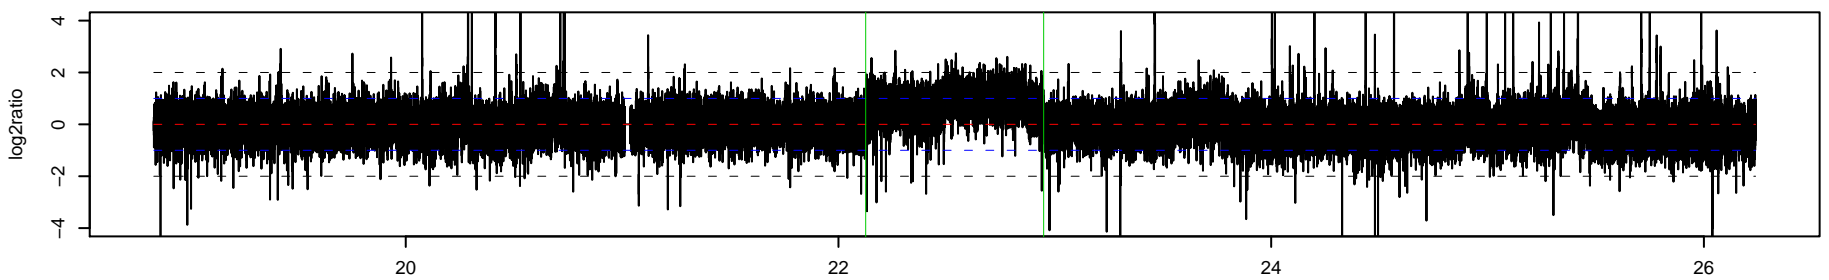

63\_AK1 Chr 2 : 22125843 – 22135962 , 10120 bp (aCGH relative log2ratio= 0.63 )

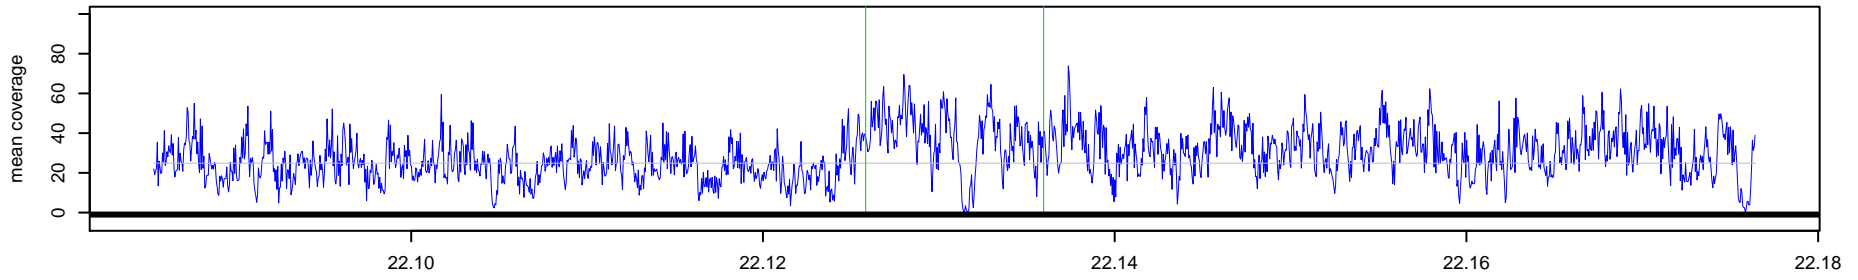

63\_NA10851 Chr 2 : 22125843 – 22135962 , 10120 bp (aCGH relative log2ratio= 0.63 )

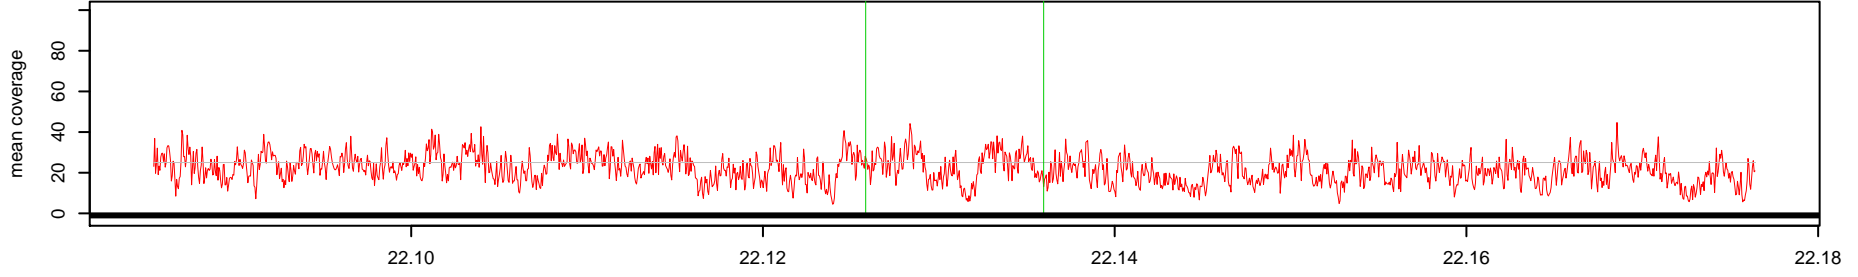

Log2( AK1 read depth / NA10851 read depth)

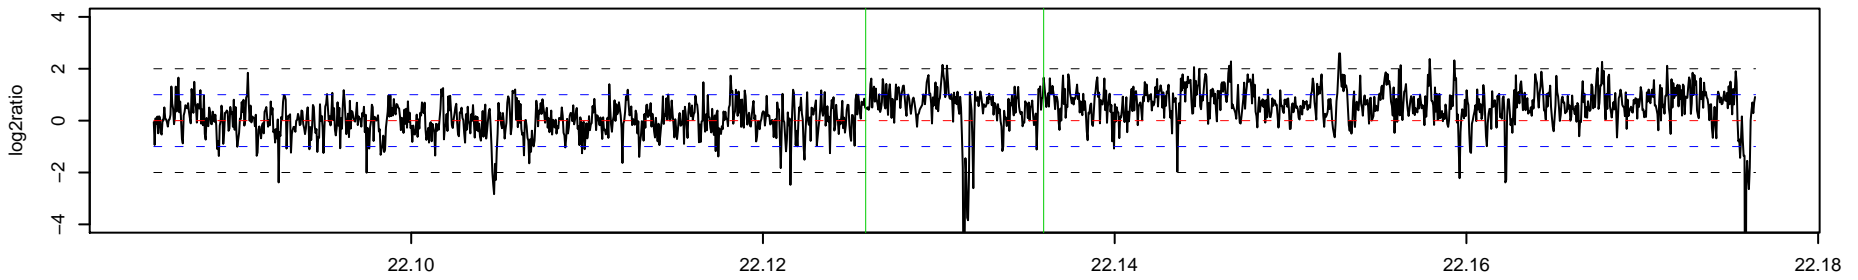

64\_AK1 Chr 2 : 22186484 – 22486204 , 299721 bp (aCGH relative log2ratio= 0.64 )

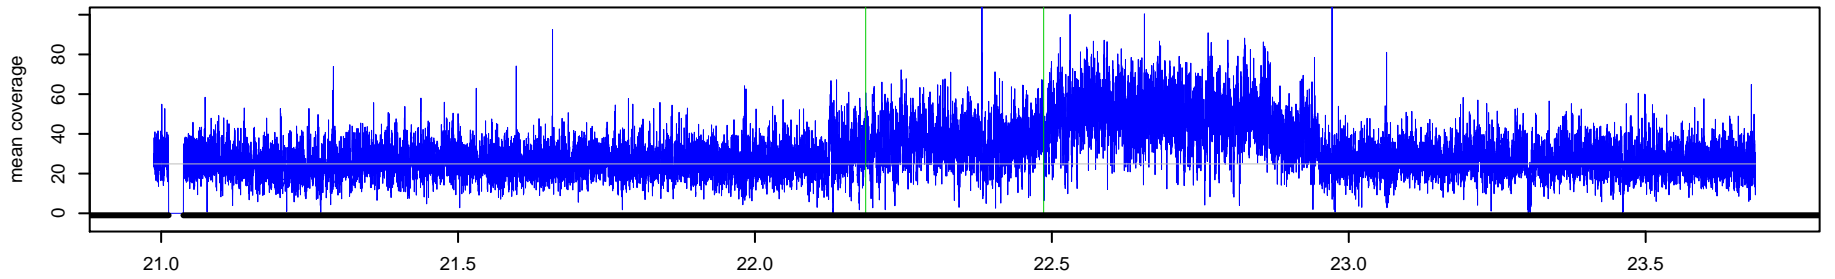

64\_NA10851 Chr 2 : 22186484 – 22486204 , 299721 bp (aCGH relative log2ratio= 0.64 )

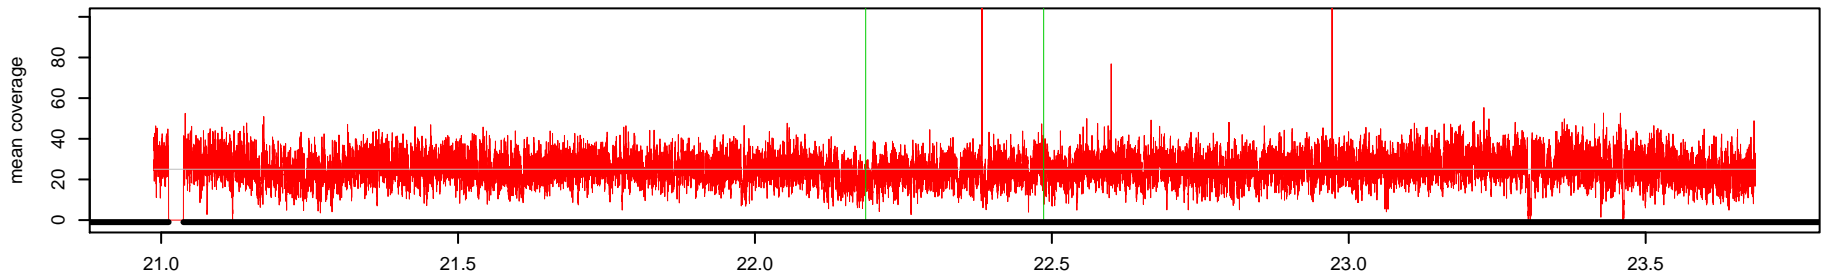

Log2( AK1 read depth / NA10851 read depth)

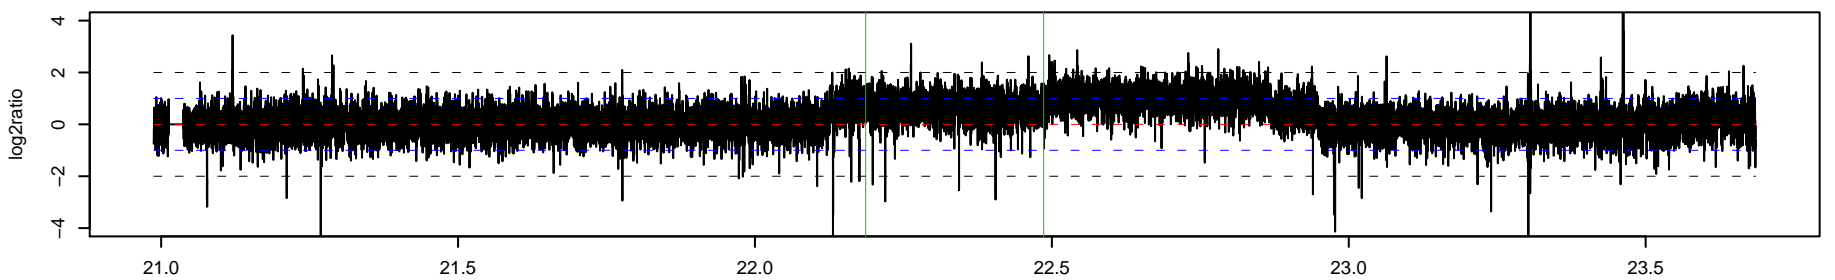

65\_AK1 Chr 2 : 22492989 – 22867527 , 374539 bp (aCGH relative log2ratio= 1.04 )

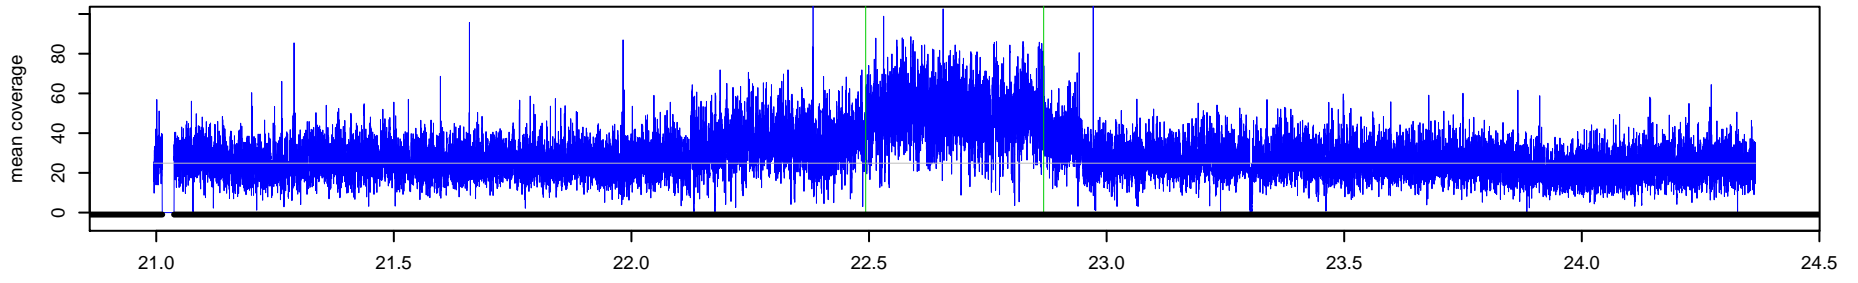

65\_NA10851 Chr 2 : 22492989 – 22867527 , 374539 bp (aCGH relative log2ratio= 1.04 )

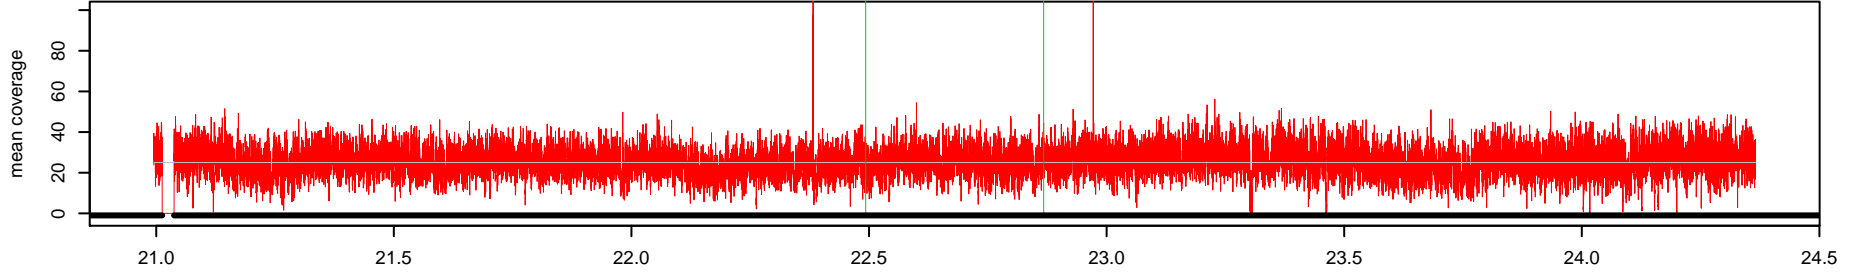

Log2( AK1 read depth / NA10851 read depth)

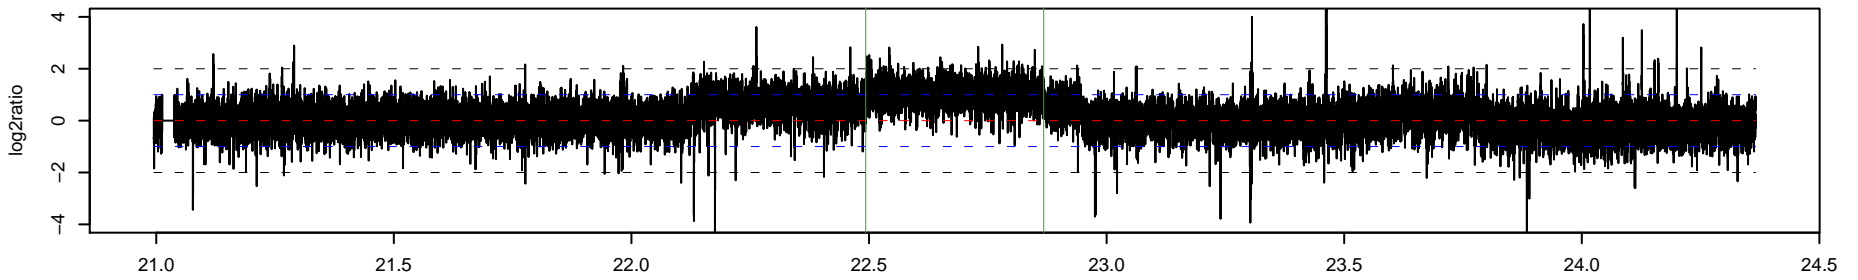

66\_AK1 Chr 2 : 22868689 – 22948221 , 79533 bp (aCGH relative log2ratio= 0.57 )

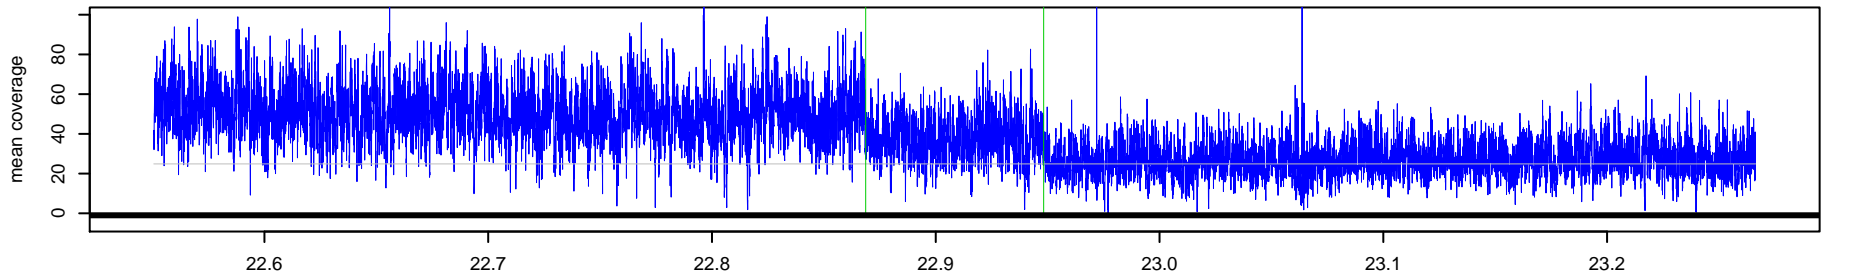

66\_NA10851 Chr 2 : 22868689 – 22948221 , 79533 bp (aCGH relative log2ratio= 0.57 )

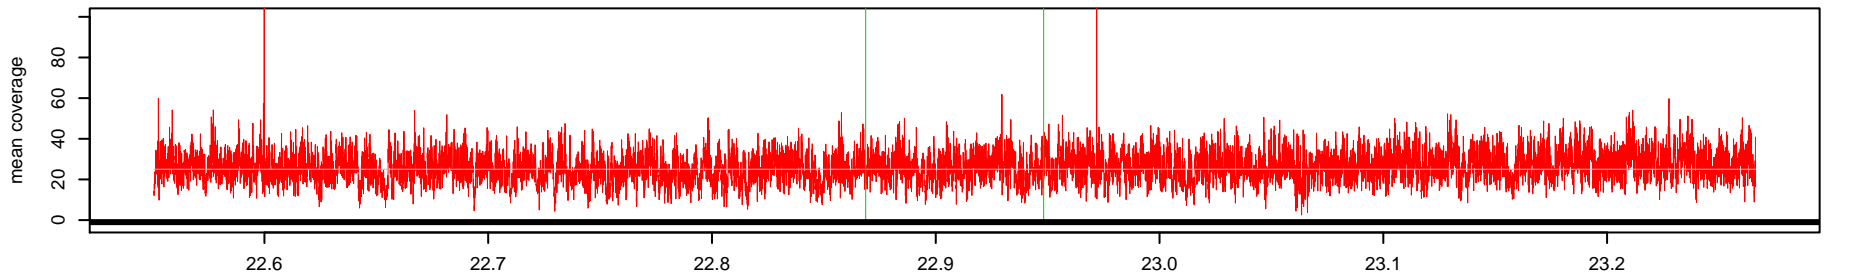

Log2( AK1 read depth / NA10851 read depth)

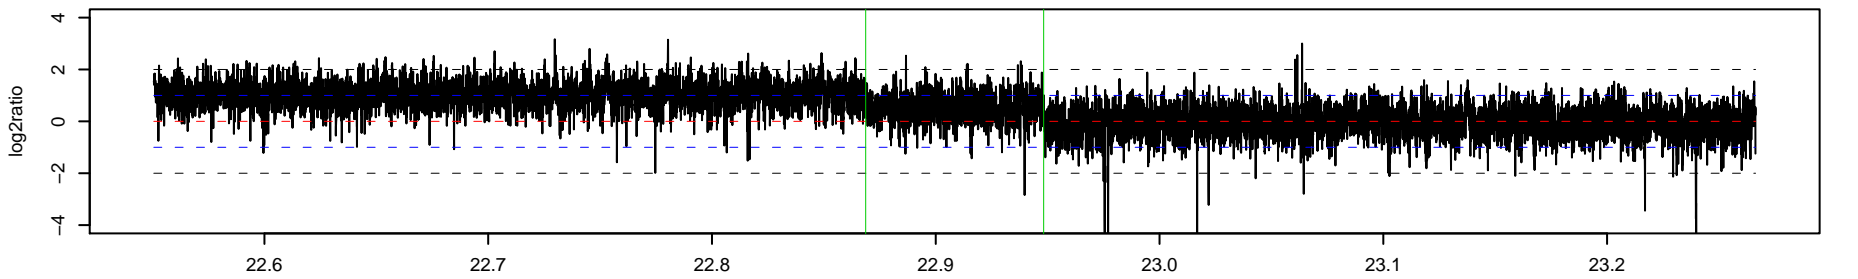

67\_AK1 Chr 2 : 32146997 – 32150088 , 3092 bp (aCGH relative log2ratio= 0.66 )

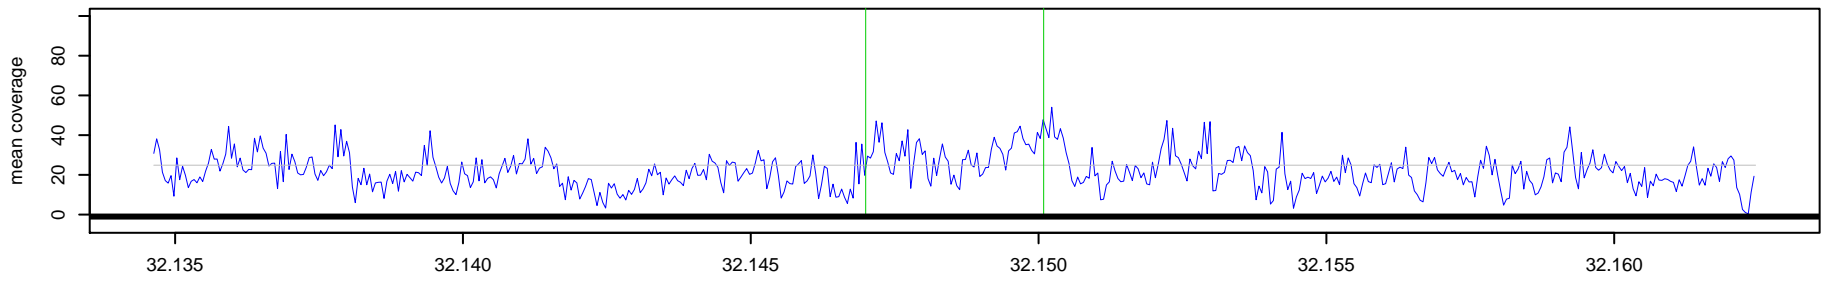

67\_NA10851 Chr 2 : 32146997 – 32150088 , 3092 bp (aCGH relative log2ratio= 0.66 )

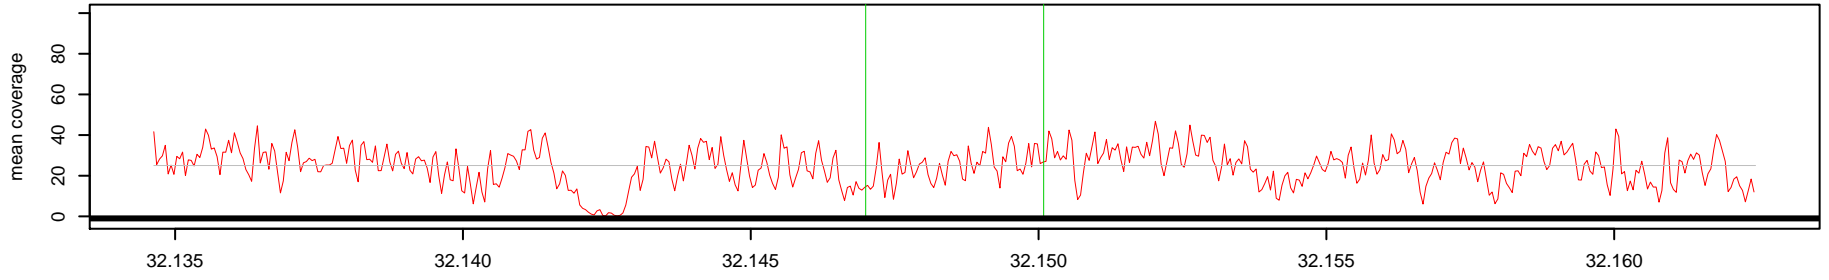

Log2( AK1 read depth / NA10851 read depth)

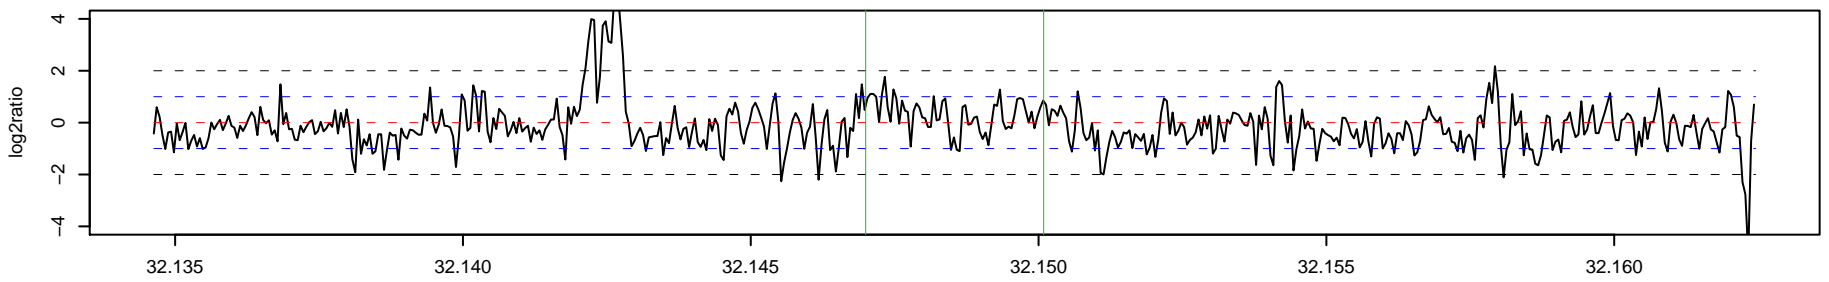

68\_AK1 Chr 2 : 33077792 – 33080769 , 2978 bp (aCGH relative log2ratio= -1.71 )

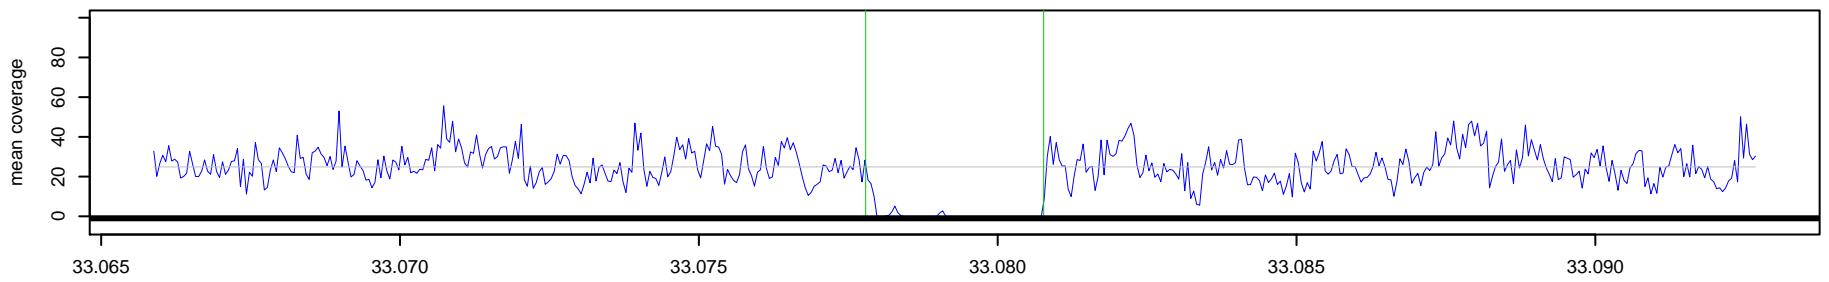

68\_NA10851 Chr 2 : 33077792 – 33080769 , 2978 bp (aCGH relative log2ratio= -1.71 )

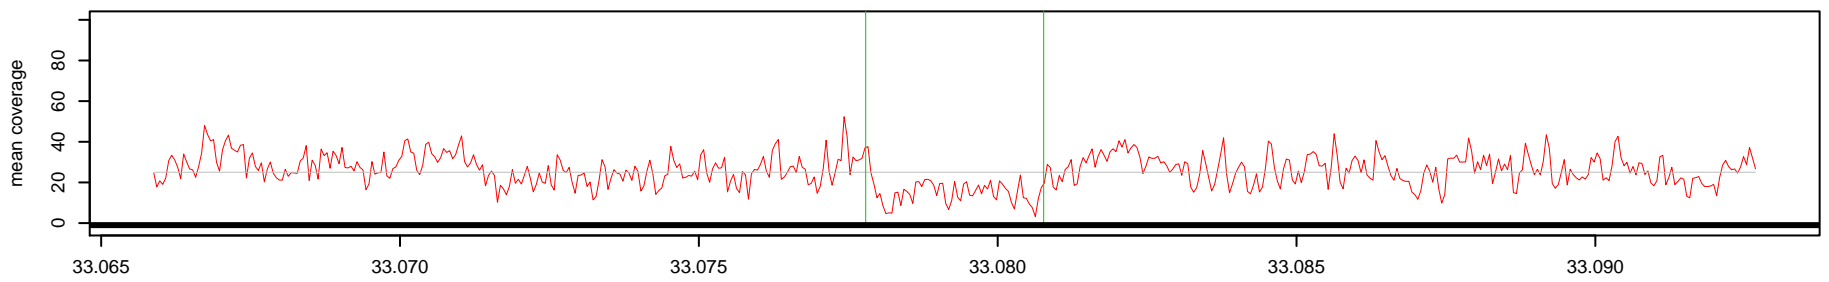

Log2( AK1 read depth / NA10851 read depth)

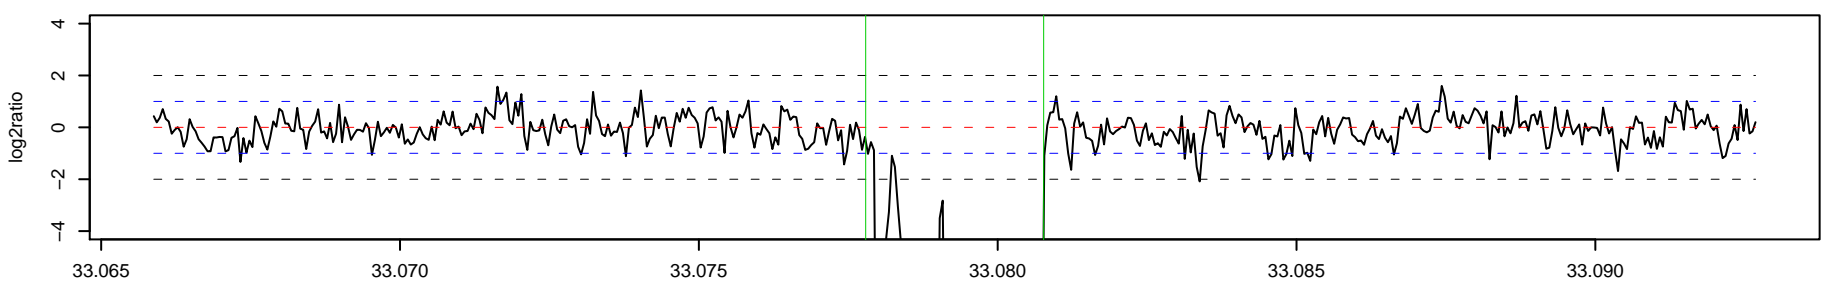

69\_AK1 Chr 2 : 33618712 – 33621311 , 2600 bp (aCGH relative log2ratio= 0.93 )

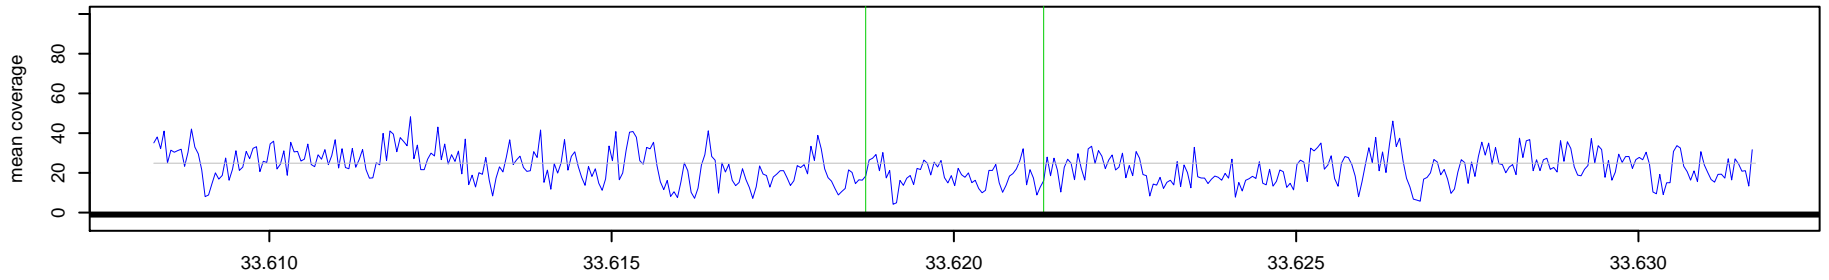

69\_NA10851 Chr 2 : 33618712 – 33621311 , 2600 bp (aCGH relative log2ratio= 0.93 )

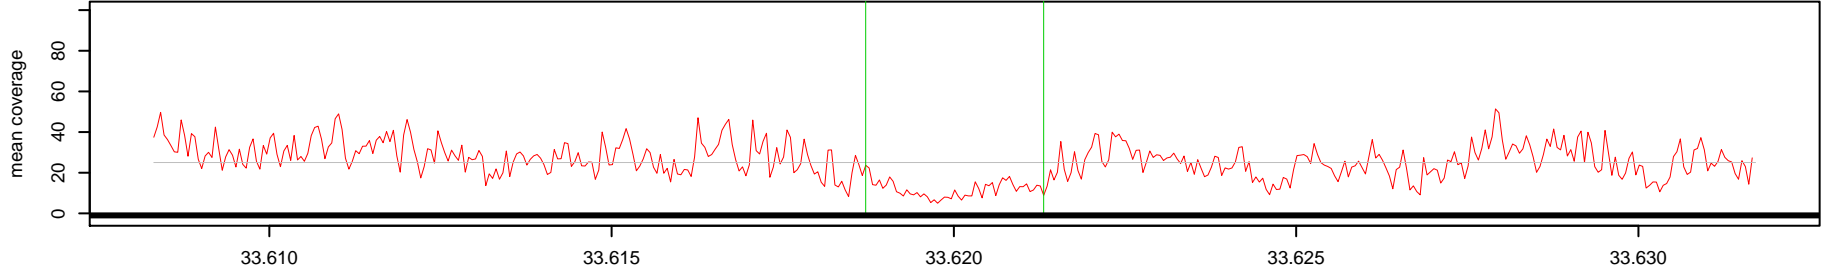

Log2( AK1 read depth / NA10851 read depth)

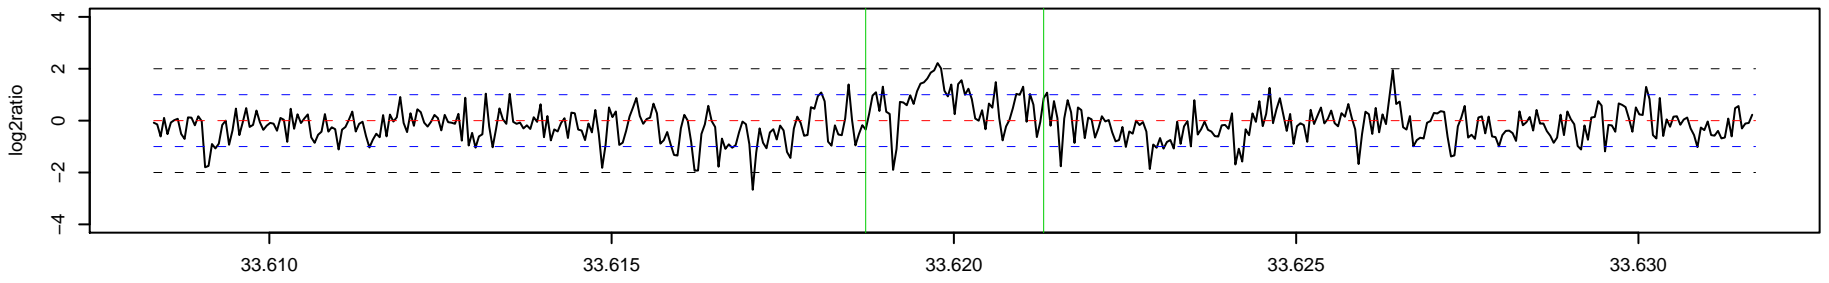

70\_AK1 Chr 2 : 34377194 – 34378411 , 1218 bp (aCGH relative log2ratio= -3.03 )

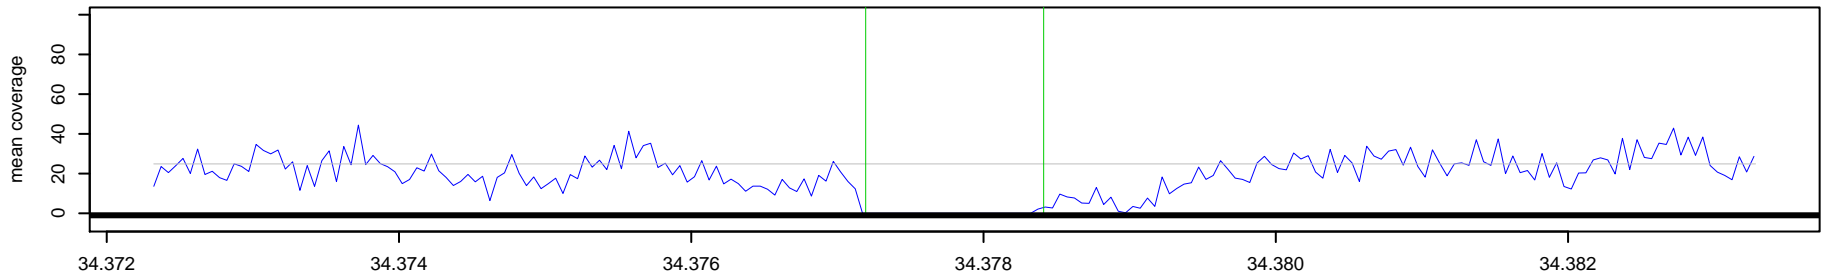

70\_NA10851 Chr 2 : 34377194 – 34378411 , 1218 bp (aCGH relative log2ratio= -3.03 )

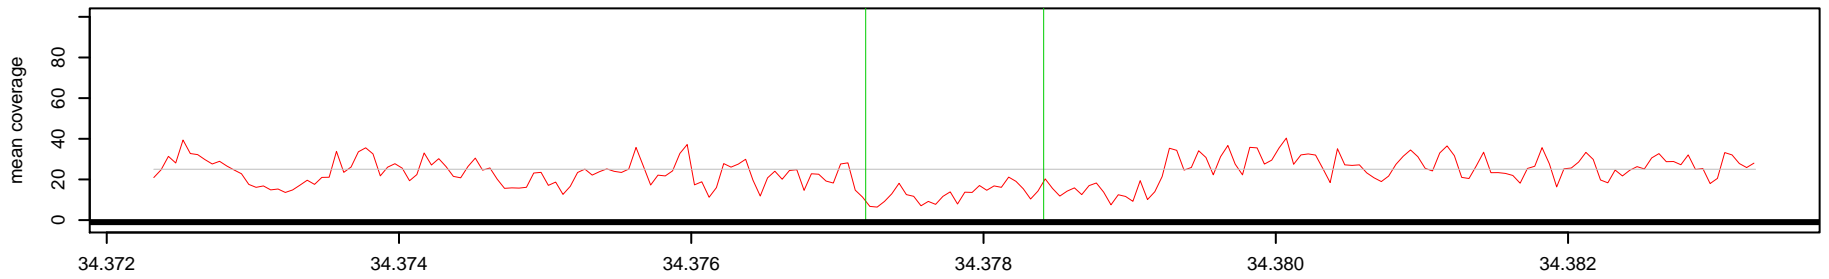

Log2( AK1 read depth / NA10851 read depth)

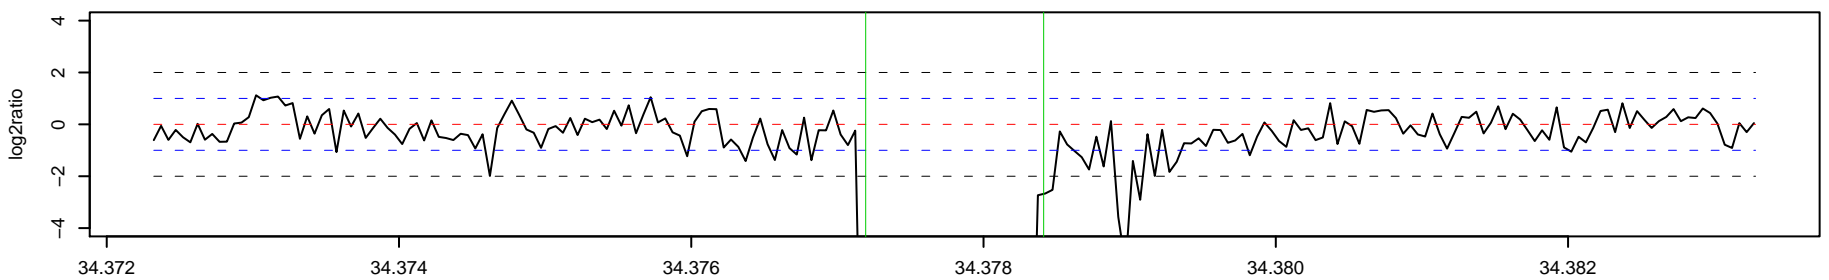

71 \_ AK1 Chr 2 : 34543973 – 34590090 , 46118 bp (aCGH relative log2ratio= 0.84 )

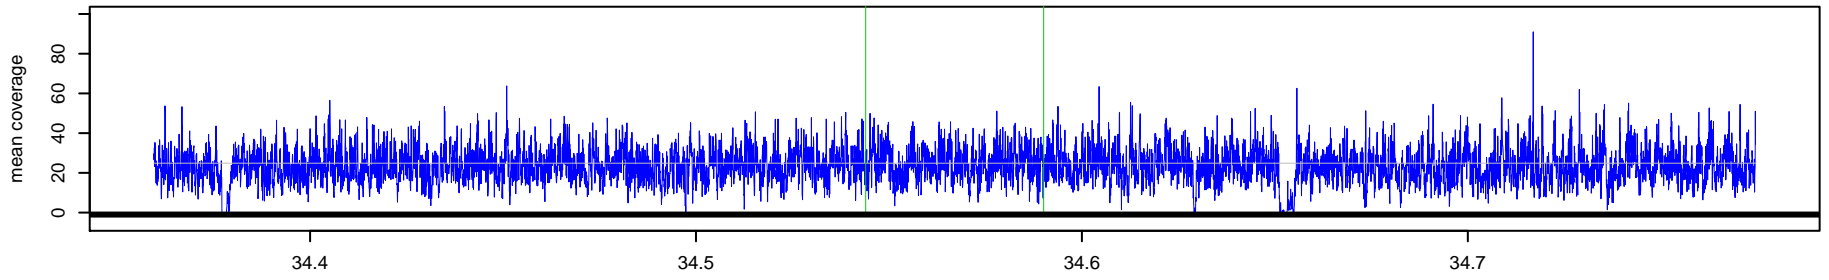

71 \_ NA10851 Chr 2 : 34543973 – 34590090 , 46118 bp (aCGH relative log2ratio= 0.84 )

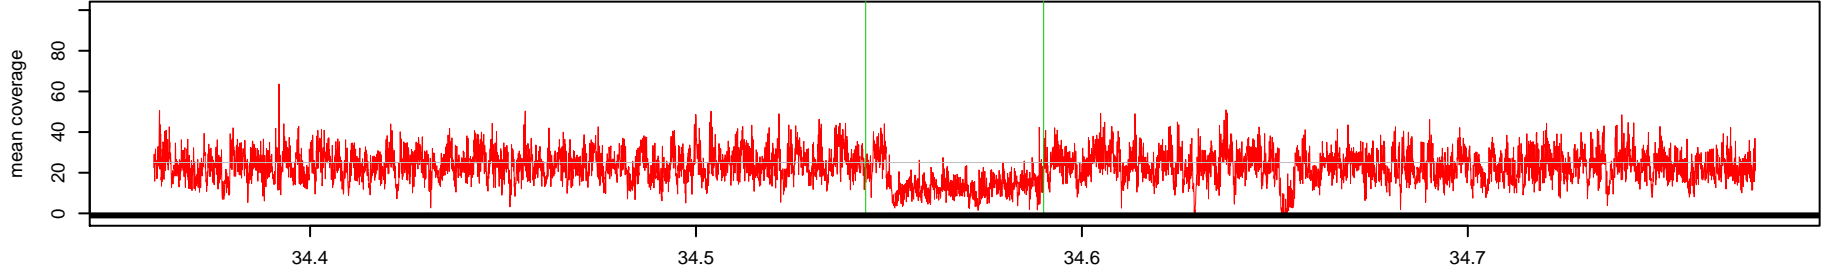

Log2( AK1 read depth / NA10851 read depth)

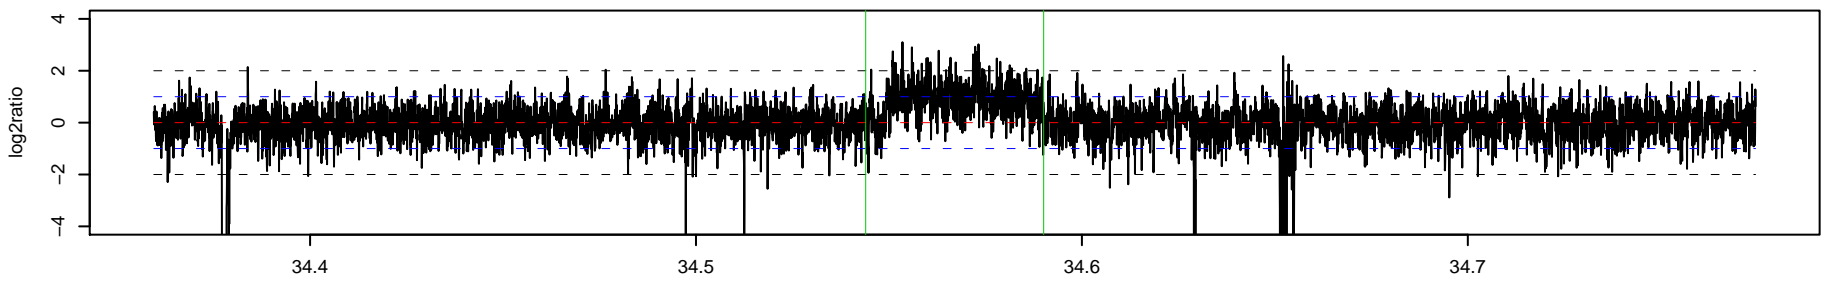

72 \_ AK1 Chr 2 : 36839851 – 36844552 , 4702 bp (aCGH relative log2ratio= 0.72 )

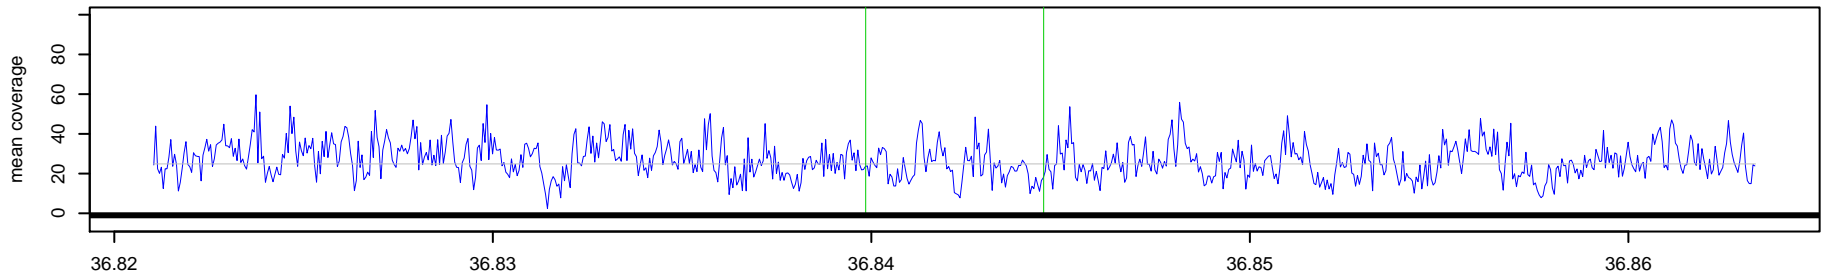

72 \_ NA10851 Chr 2 : 36839851 – 36844552 , 4702 bp (aCGH relative log2ratio= 0.72 )

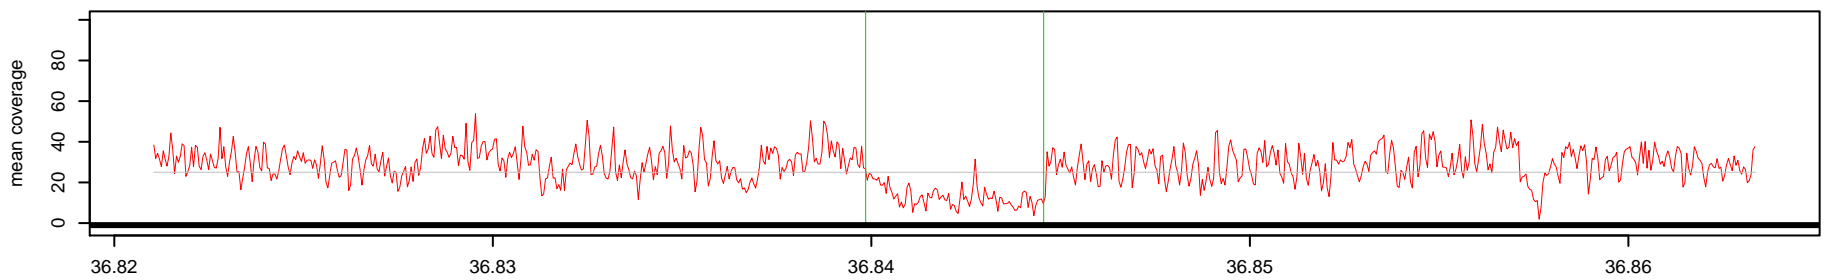

Log2( AK1 read depth / NA10851 read depth)

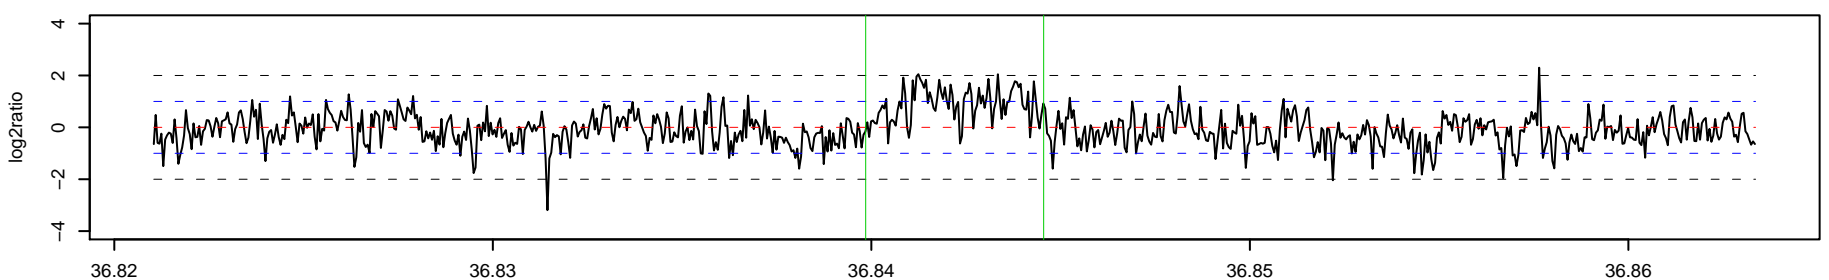



73 \_ AK1 Chr 2 : 37811844 – 37856339 , 44496 bp (aCGH relative log2ratio= -0.46 )

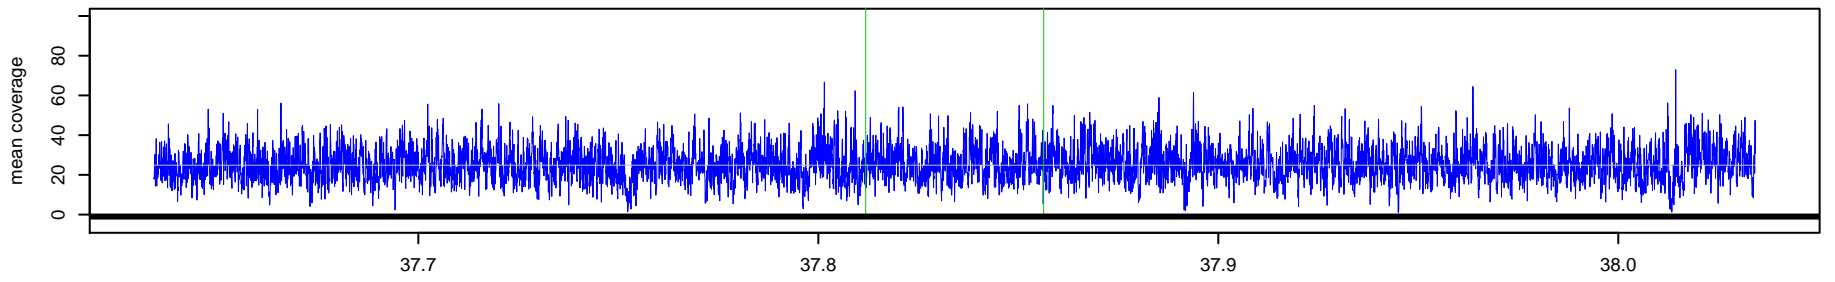

73 \_ NA10851 Chr 2 : 37811844 – 37856339 , 44496 bp (aCGH relative log2ratio= -0.46 )

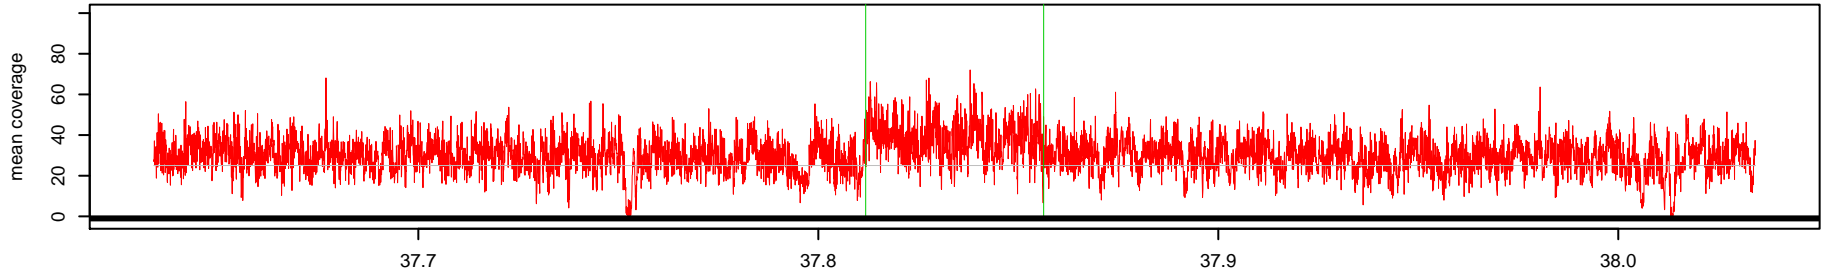

Log2( AK1 read depth / NA10851 read depth)

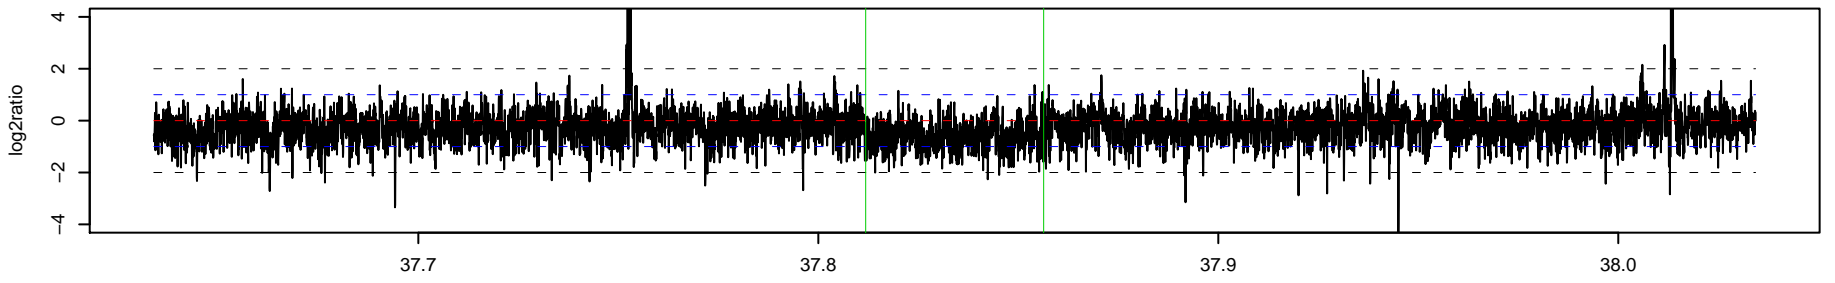

74 \_ AK1 Chr 2 : 38809169 – 38826139 , 16971 bp (aCGH relative log2ratio= -0.61 )

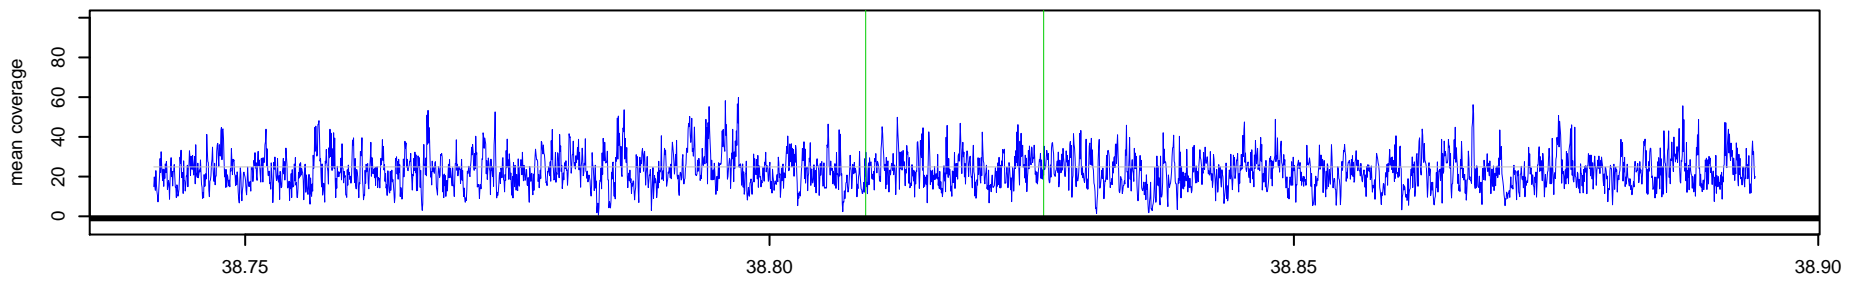

74 \_ NA10851 Chr 2 : 38809169 – 38826139 , 16971 bp (aCGH relative log2ratio= -0.61 )

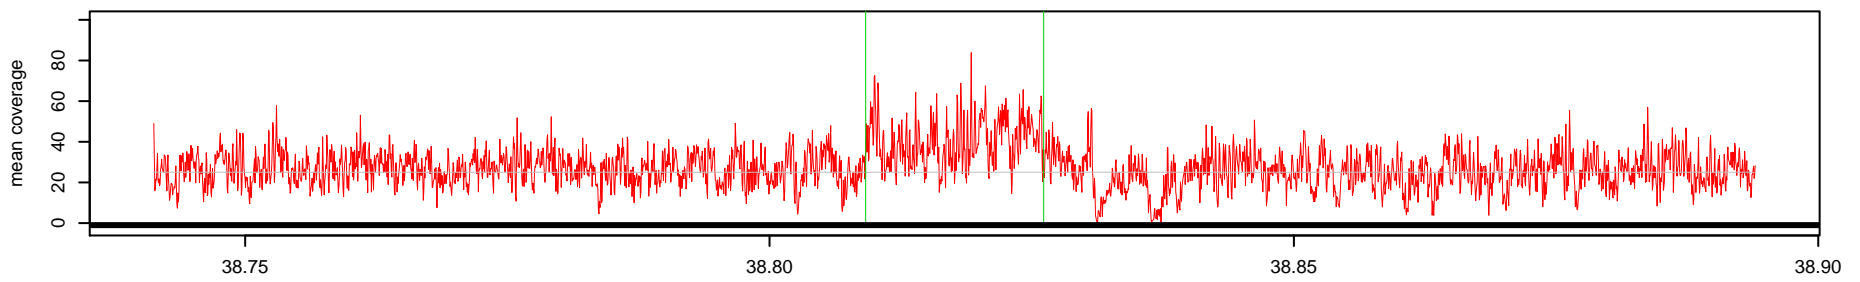

Log2( AK1 read depth / NA10851 read depth)

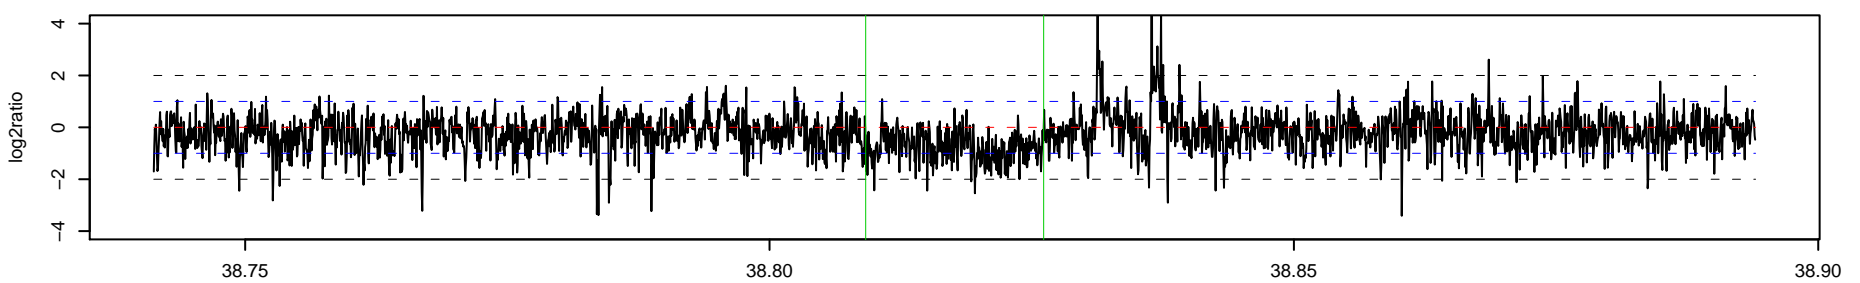

75\_AK1 Chr 2 : 46268047 – 46268583 , 537 bp (aCGH relative log2ratio= 0.29 )

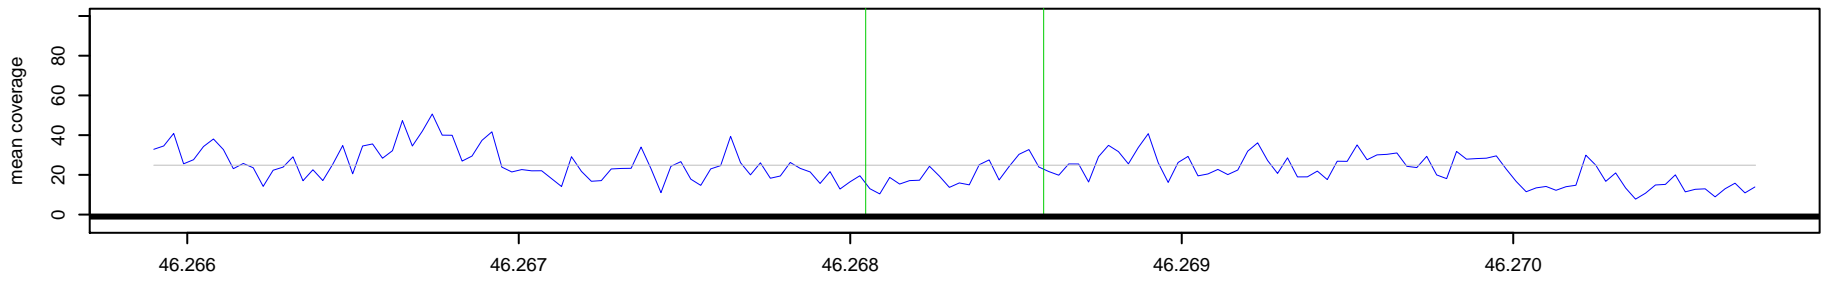

75\_NA10851 Chr 2 : 46268047 – 46268583 , 537 bp (aCGH relative log2ratio= 0.29 )

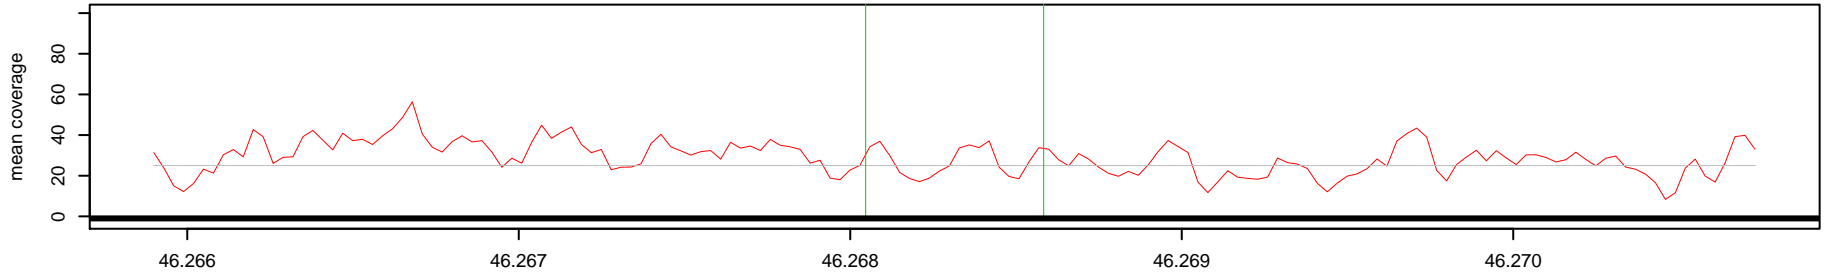

Log2( AK1 read depth / NA10851 read depth)

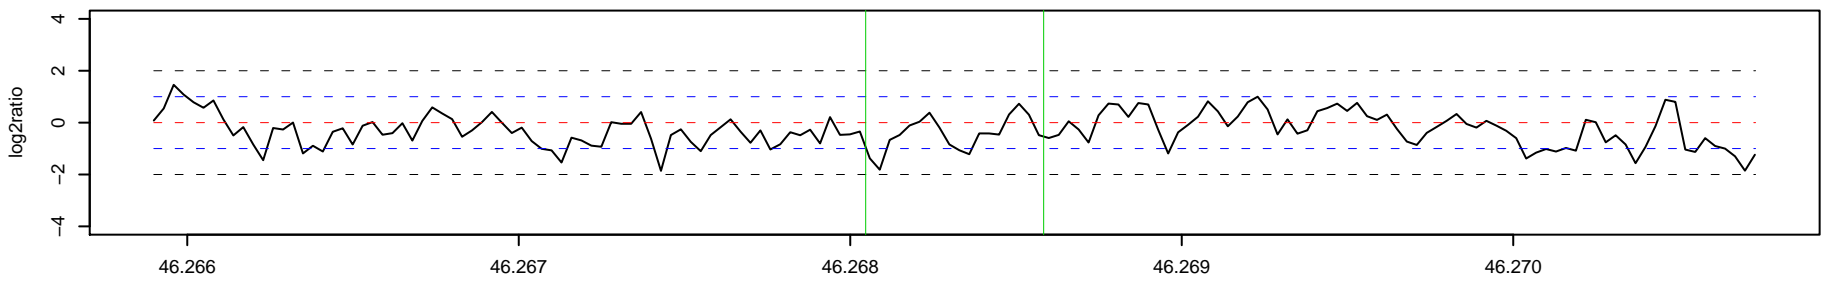

76\_AK1 Chr 2 : 52603146 – 52638484 , 35339 bp (aCGH relative log2ratio= -3.47 )

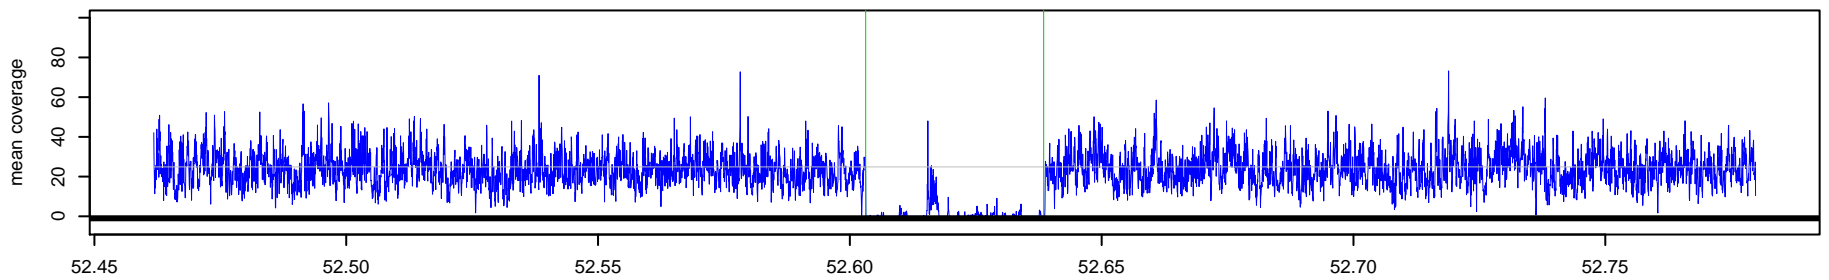

76\_NA10851 Chr 2 : 52603146 – 52638484 , 35339 bp (aCGH relative log2ratio= -3.47 )

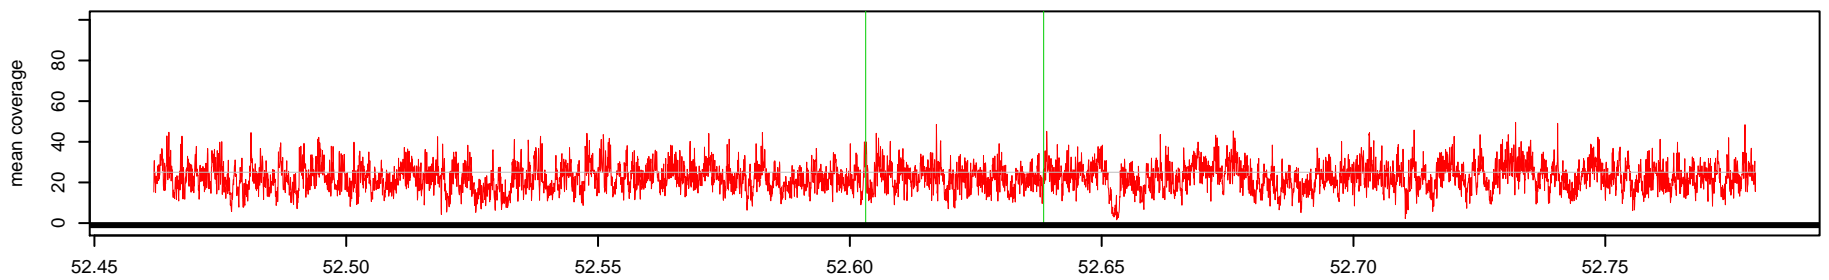

Log2( AK1 read depth / NA10851 read depth)

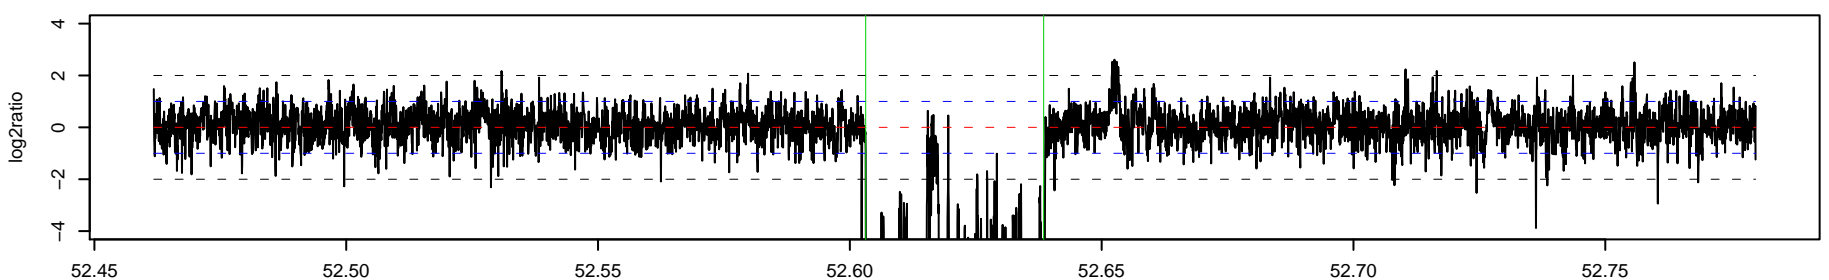

77\_AK1 Chr 2 : 53411372 – 53412992 , 1621 bp (aCGH relative log2ratio= 0.96 )

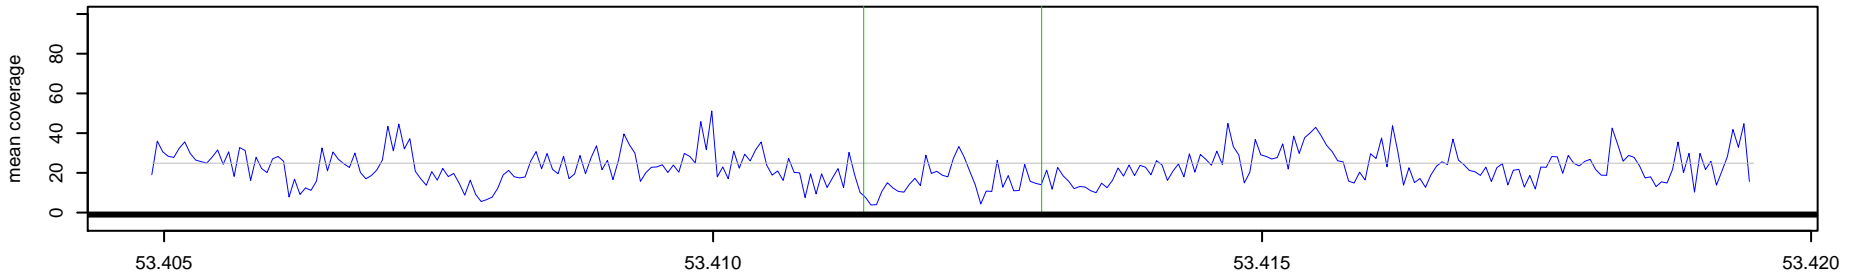

77\_NA10851 Chr 2 : 53411372 – 53412992 , 1621 bp (aCGH relative log2ratio= 0.96 )

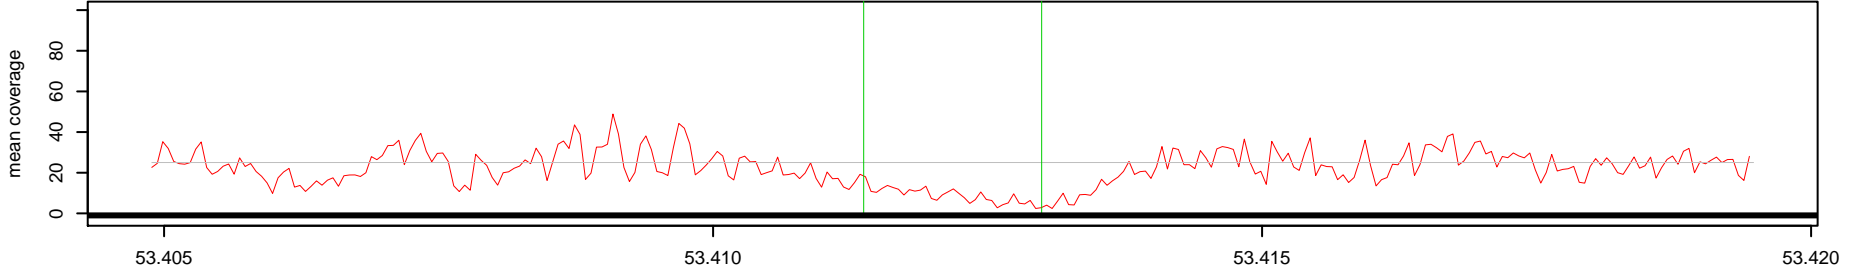

Log2( AK1 read depth / NA10851 read depth)

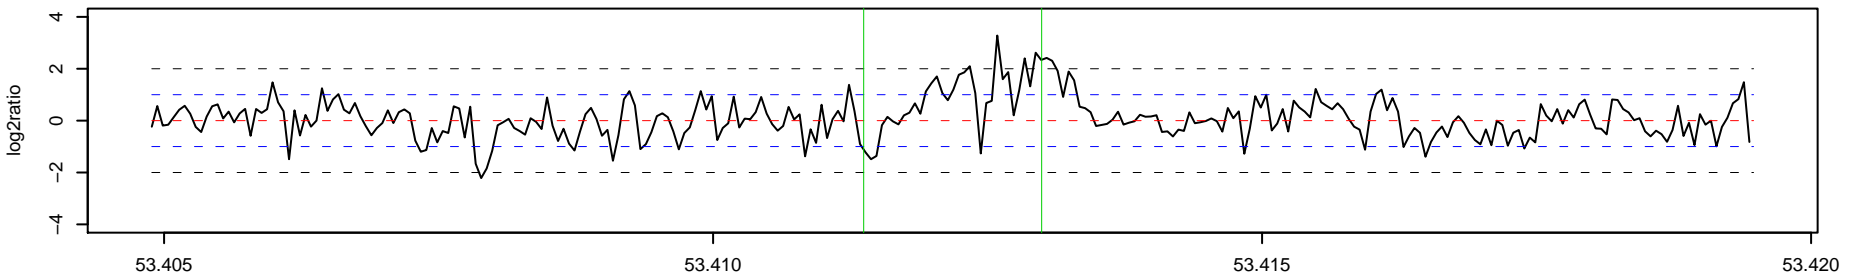

78\_AK1 Chr 2 : 54418950 – 54420926 , 1977 bp (aCGH relative log2ratio= 1.72 )

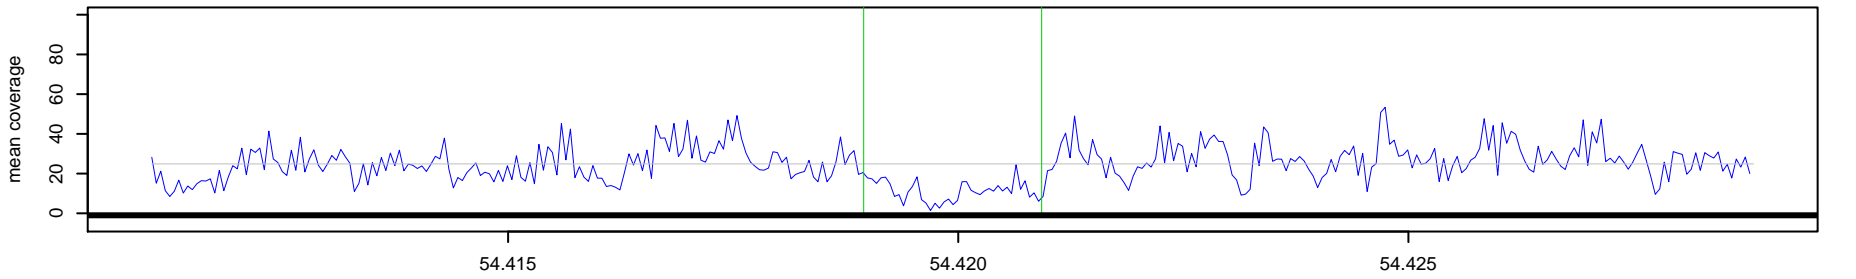

78\_NA10851 Chr 2 : 54418950 – 54420926 , 1977 bp (aCGH relative log2ratio= 1.72 )

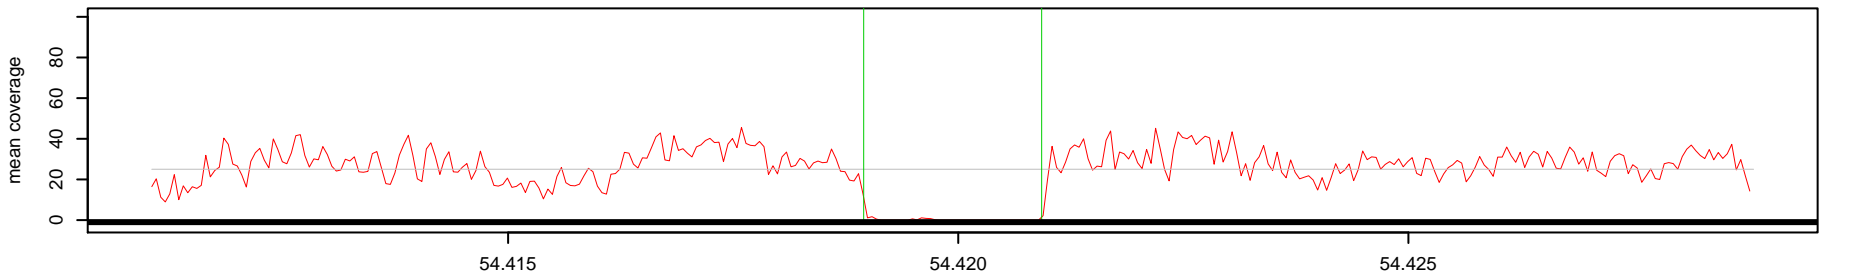

Log2( AK1 read depth / NA10851 read depth)

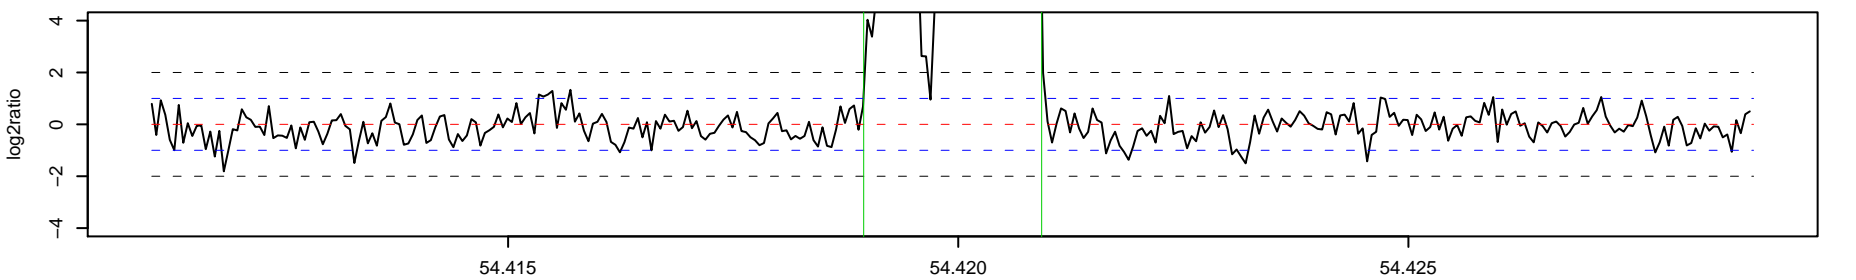

79\_AK1 Chr 2 : 56507665 – 56509079 , 1415 bp (aCGH relative log2ratio= 2.35 )

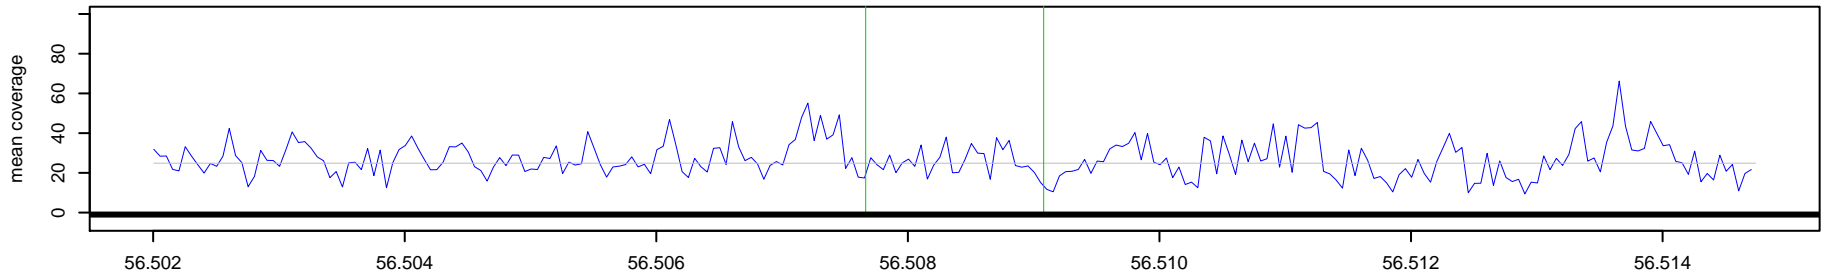

79\_NA10851 Chr 2 : 56507665 – 56509079 , 1415 bp (aCGH relative log2ratio= 2.35 )

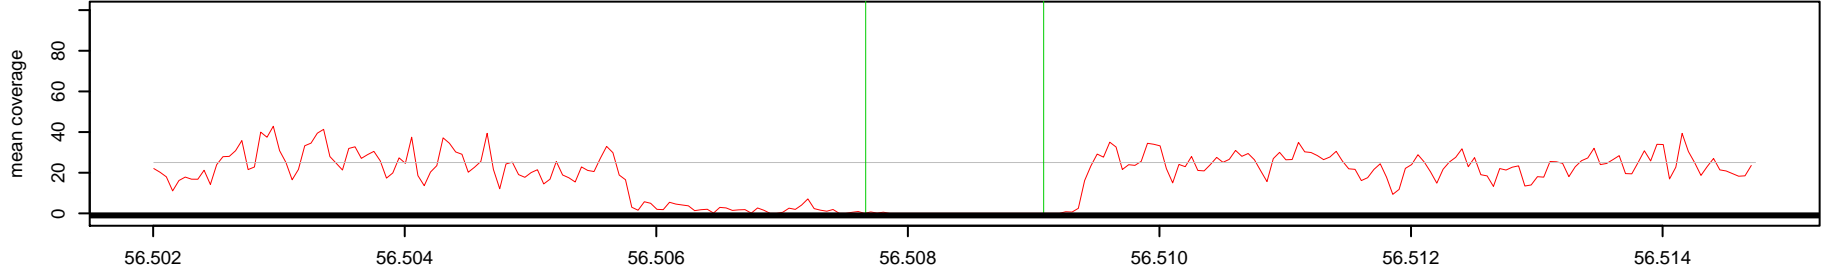

Log2( AK1 read depth / NA10851 read depth)

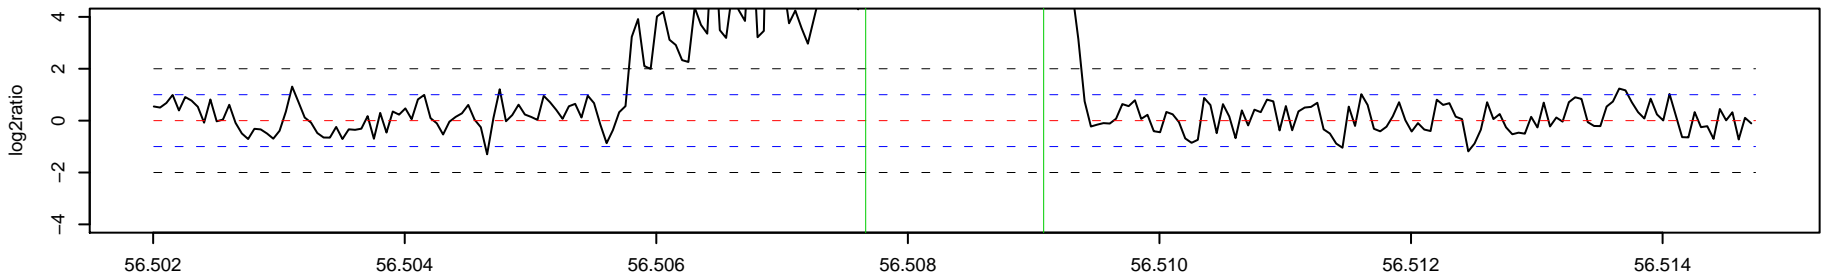

80\_AK1 Chr 2 : 66359089 – 66361142 , 2054 bp (aCGH relative log2ratio= -2.79 )

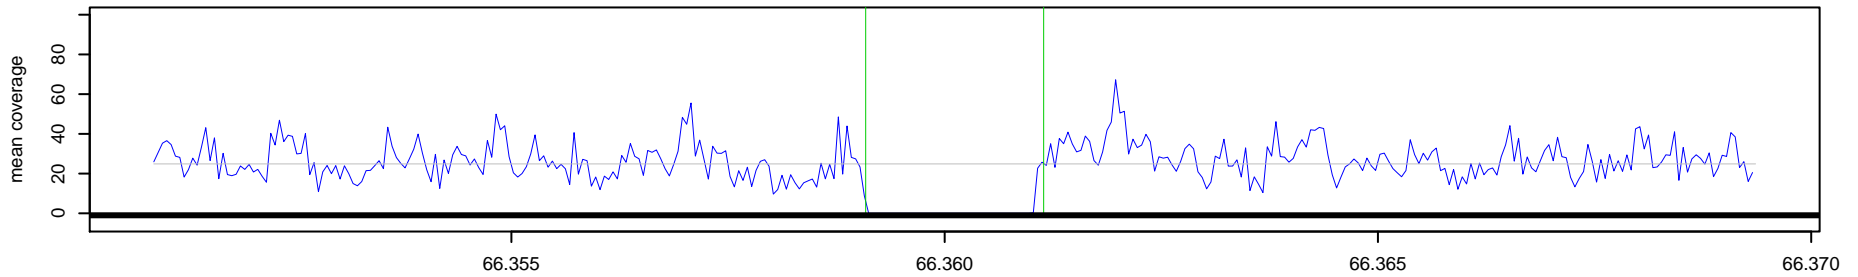

80\_NA10851 Chr 2 : 66359089 – 66361142 , 2054 bp (aCGH relative log2ratio= -2.79 )

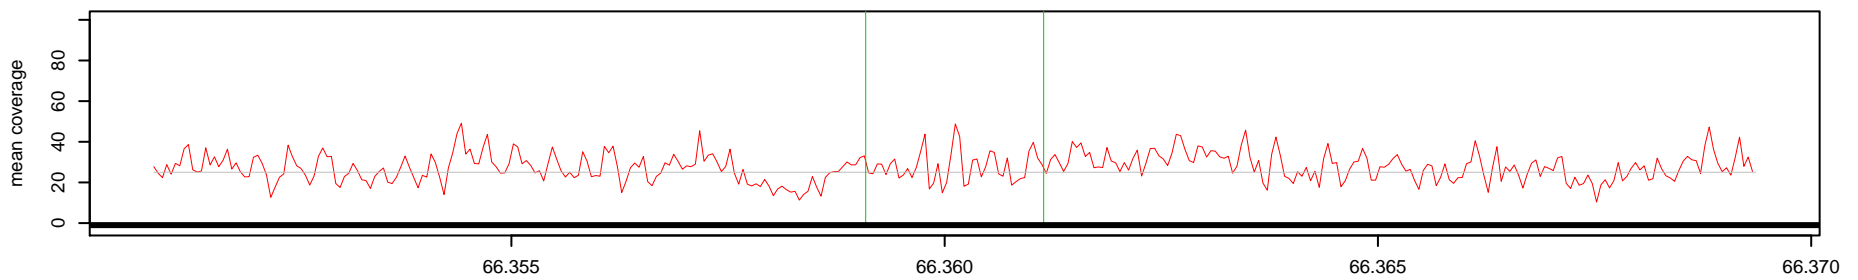

Log2( AK1 read depth / NA10851 read depth)

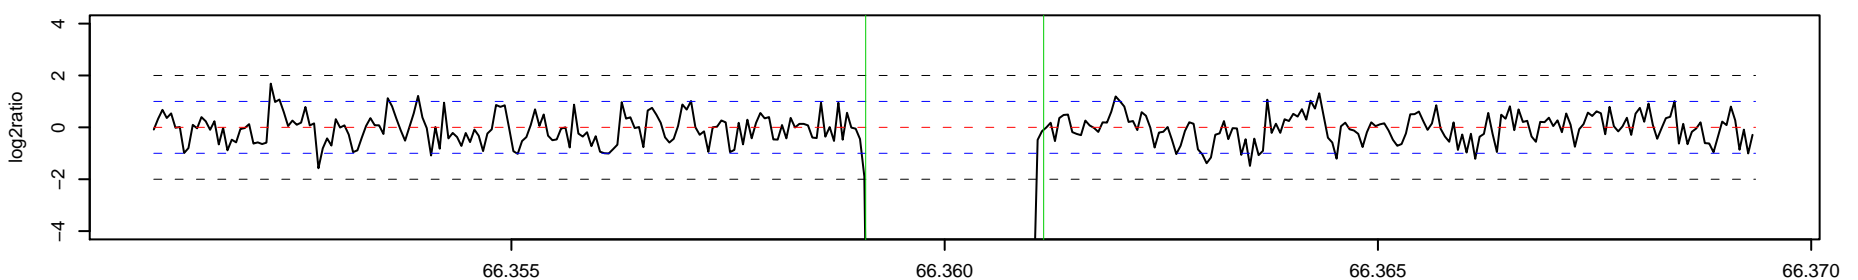

81\_AK1 Chr 2 : 68767735 – 68768275 , 541 bp (aCGH relative log2ratio= 0.54 )

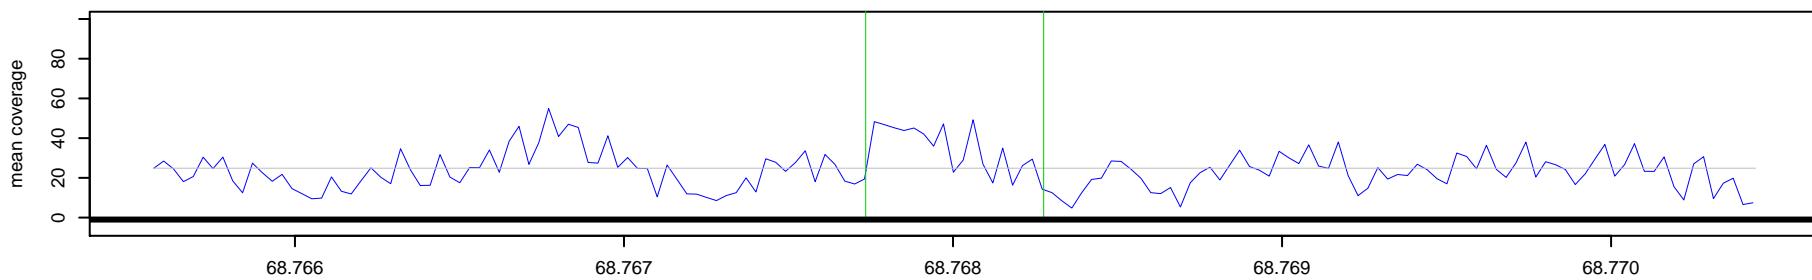

81\_NA10851 Chr 2 : 68767735 – 68768275 , 541 bp (aCGH relative log2ratio= 0.54 )

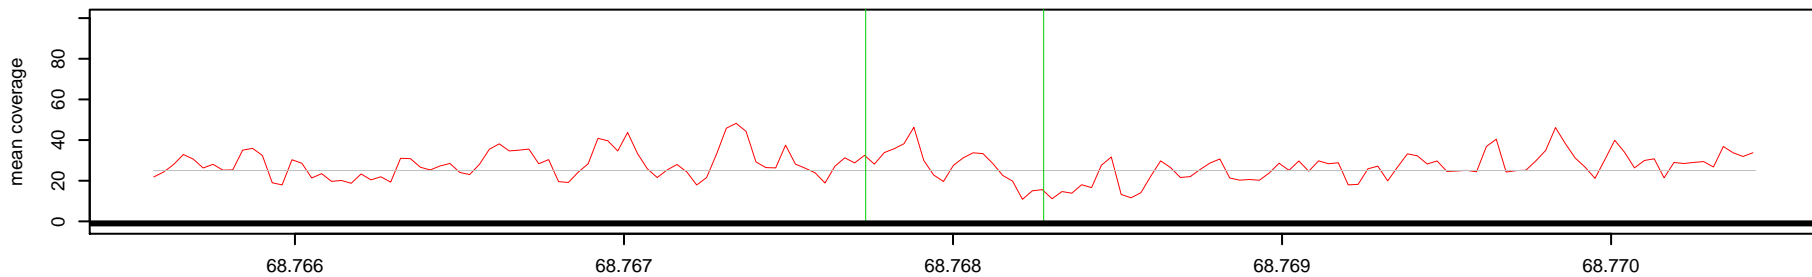

Log2( AK1 read depth / NA10851 read depth)

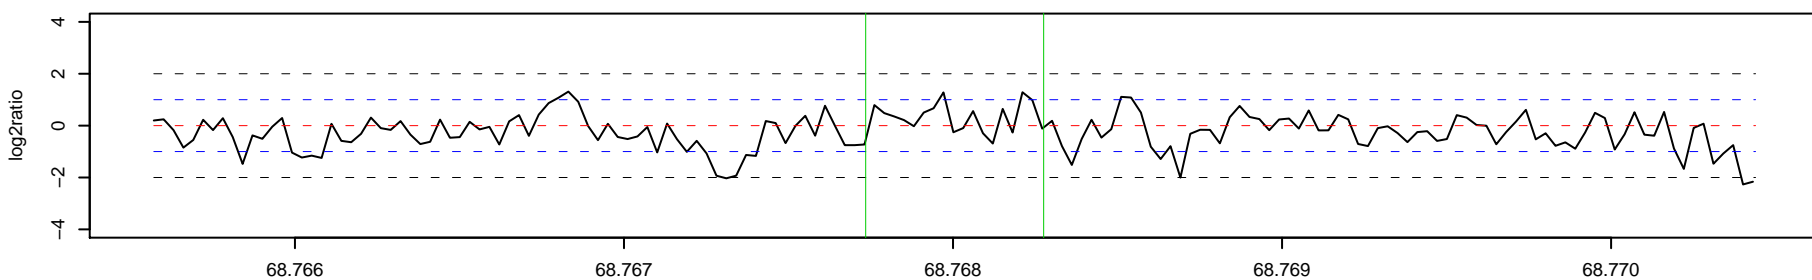

82\_AK1 Chr 2 : 74761391 – 74761890 , 500 bp (aCGH relative log2ratio= -0.51 )

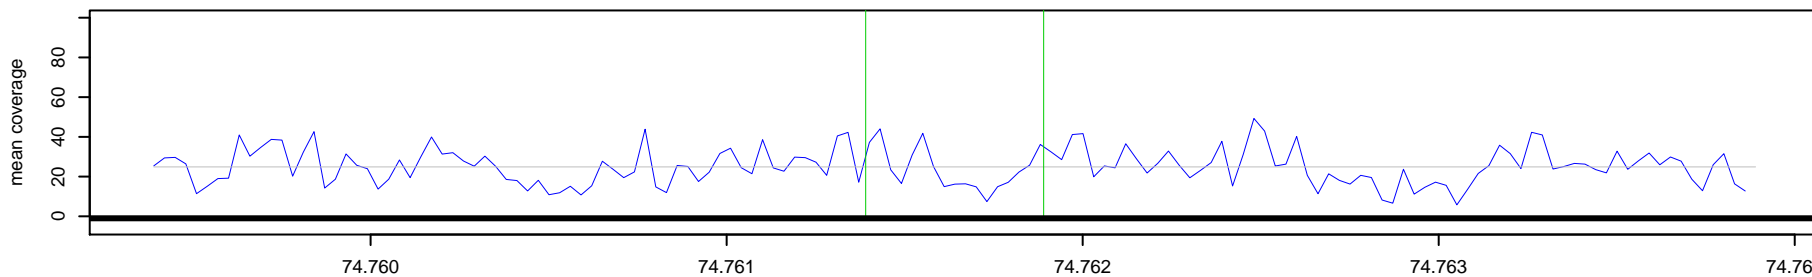

82\_NA10851 Chr 2 : 74761391 – 74761890 , 500 bp (aCGH relative log2ratio= -0.51 )

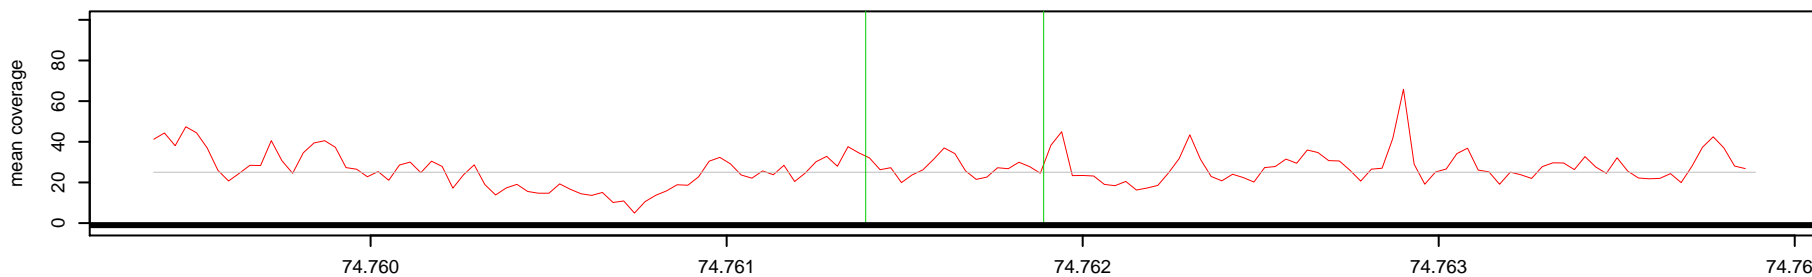

Log2( AK1 read depth / NA10851 read depth)

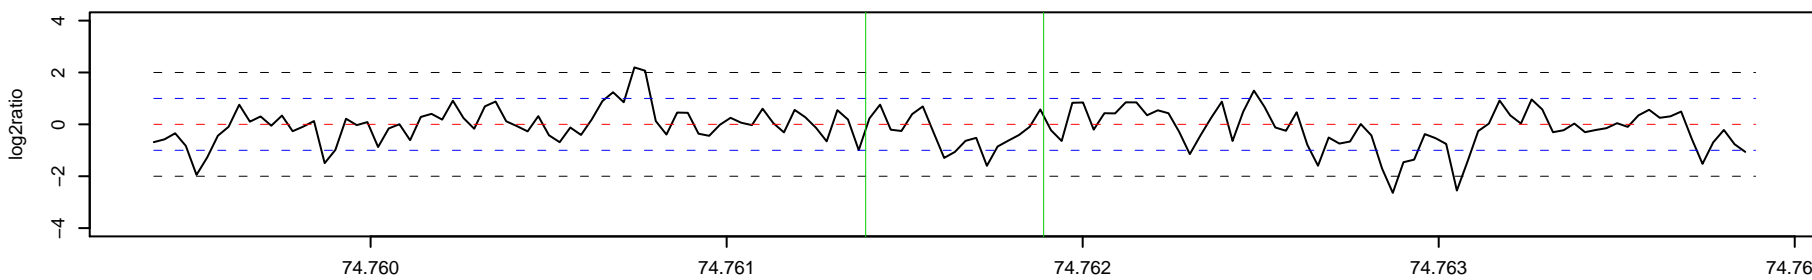

83\_AK1 Chr 2 : 75674806 – 75770568 , 95763 bp (aCGH relative log2ratio= 0.56 )

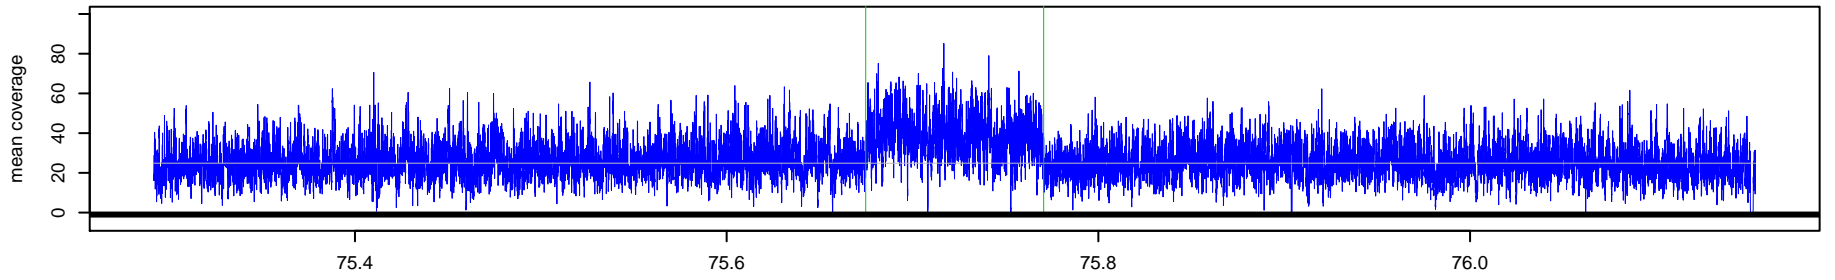

83\_NA10851 Chr 2 : 75674806 – 75770568 , 95763 bp (aCGH relative log2ratio= 0.56 )

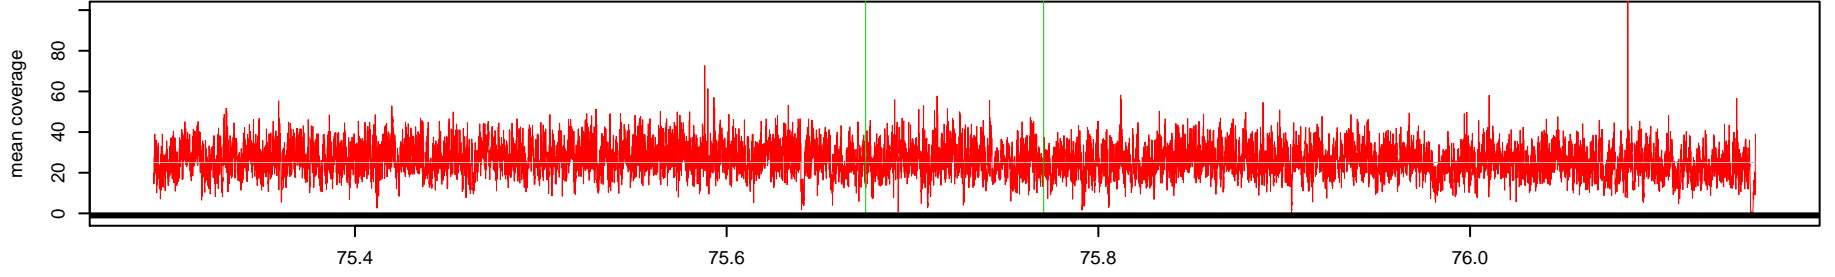

Log2( AK1 read depth / NA10851 read depth)

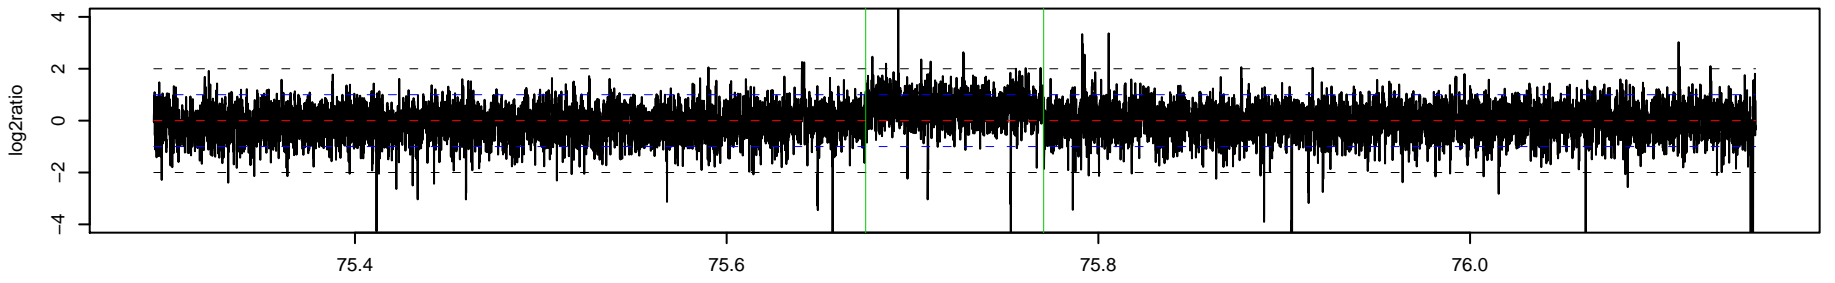

84\_AK1 Chr 2 : 83892306 – 84167509 , 275204 bp (aCGH relative log2ratio= 0.61 )

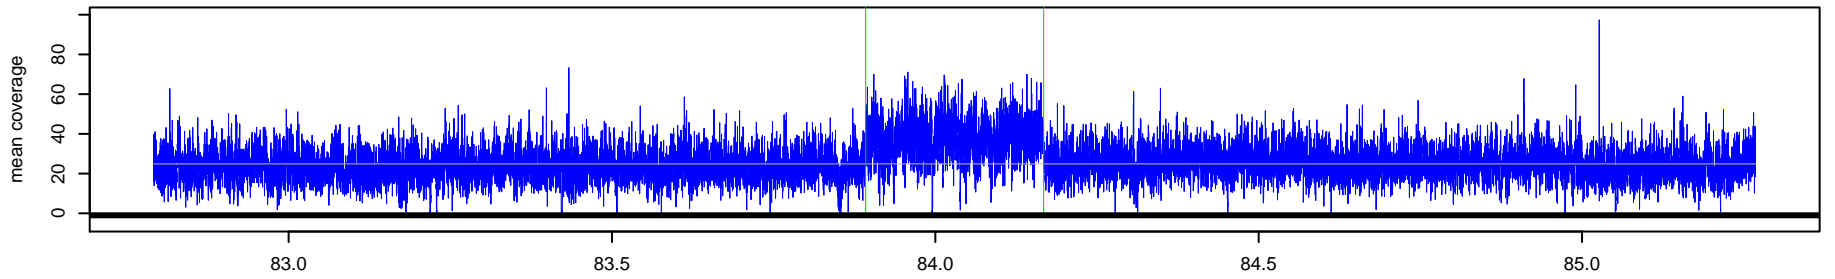

84\_NA10851 Chr 2 : 83892306 – 84167509 , 275204 bp (aCGH relative log2ratio= 0.61 )

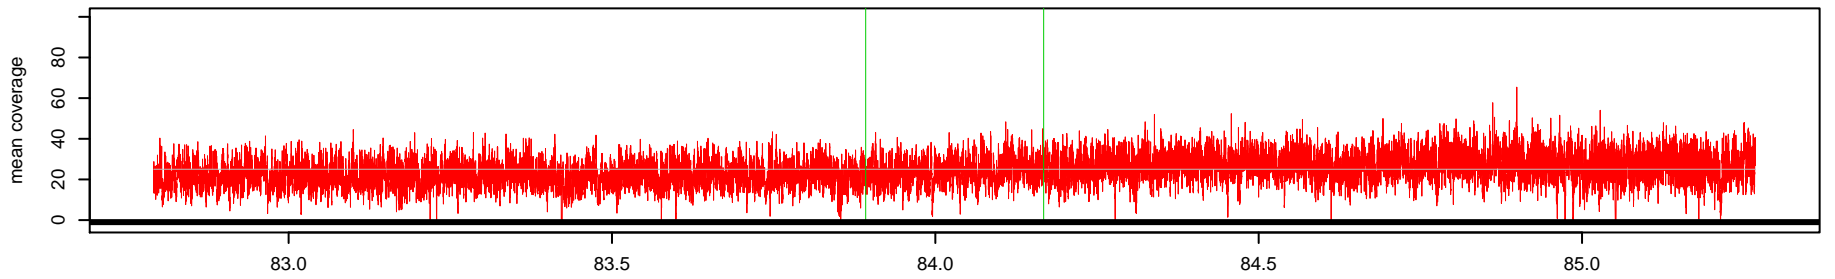

Log2( AK1 read depth / NA10851 read depth)

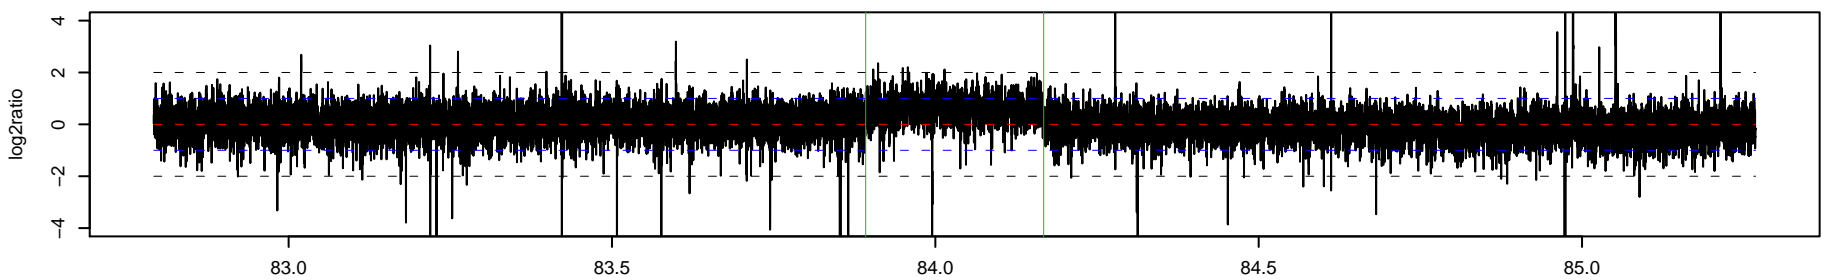

85\_AK1 Chr 2 : 88913522 – 88942139 , 28618 bp (aCGH relative log2ratio= 1.77 )

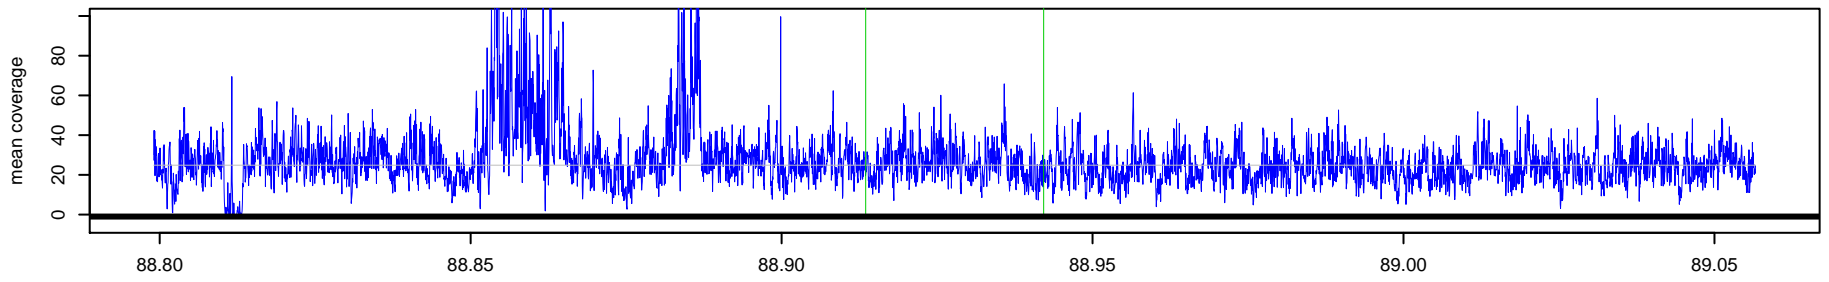

85\_NA10851 Chr 2 : 88913522 – 88942139 , 28618 bp (aCGH relative log2ratio= 1.77 )

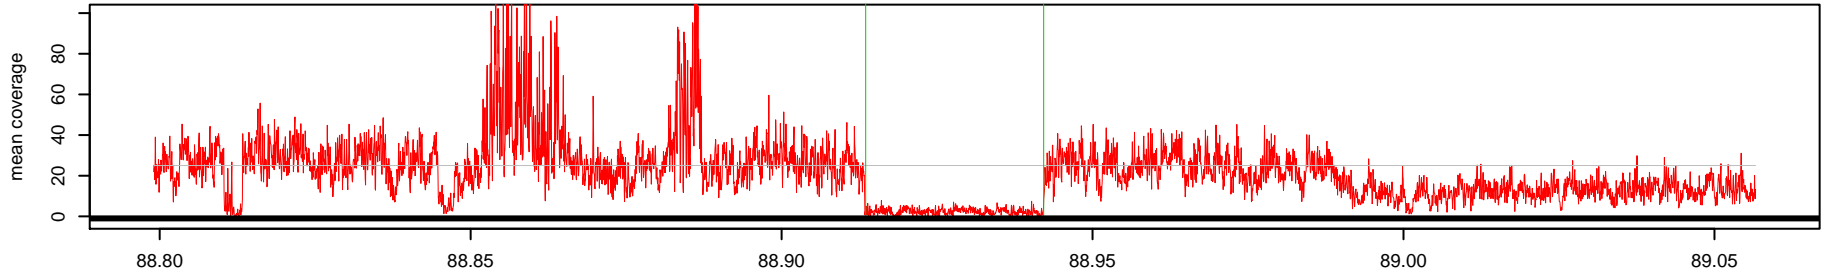

Log2( AK1 read depth / NA10851 read depth)

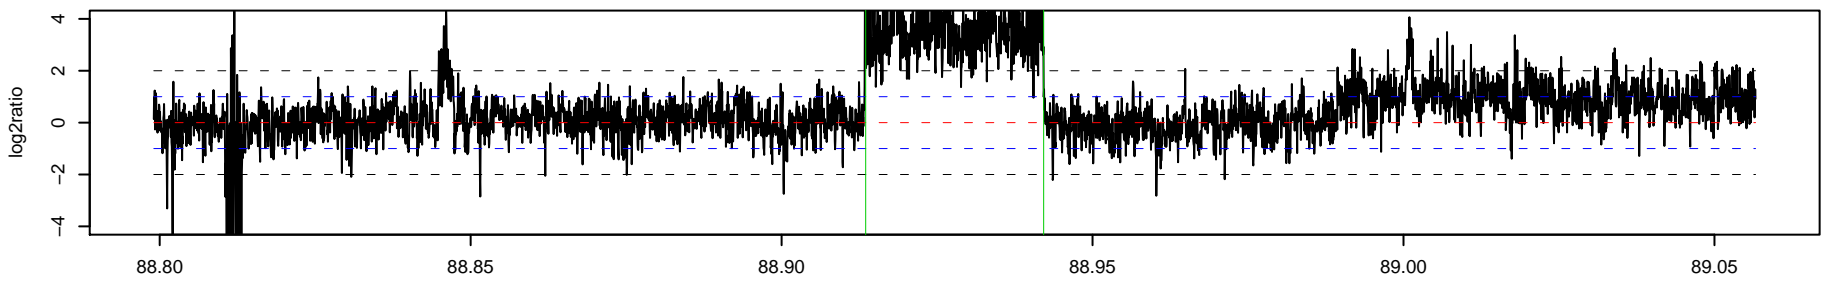

86\_AK1 Chr 2 : 88942139 – 88942882 , 744 bp (aCGH relative log2ratio= 0.51 )

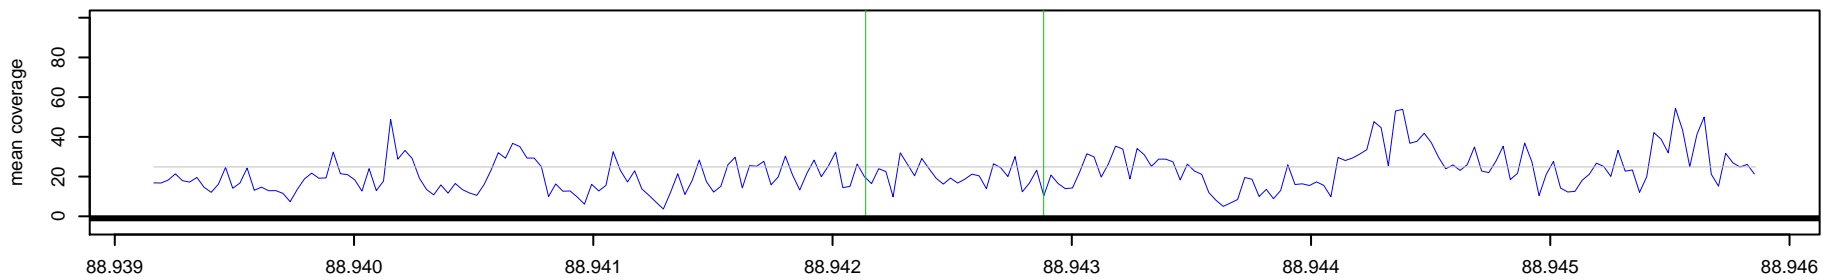

86\_NA10851 Chr 2 : 88942139 – 88942882 , 744 bp (aCGH relative log2ratio= 0.51 )

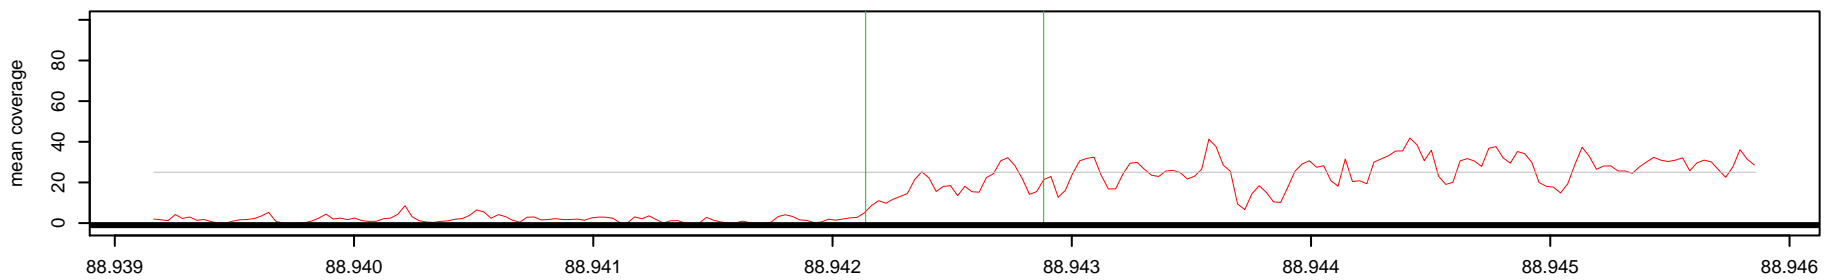

Log2( AK1 read depth / NA10851 read depth)

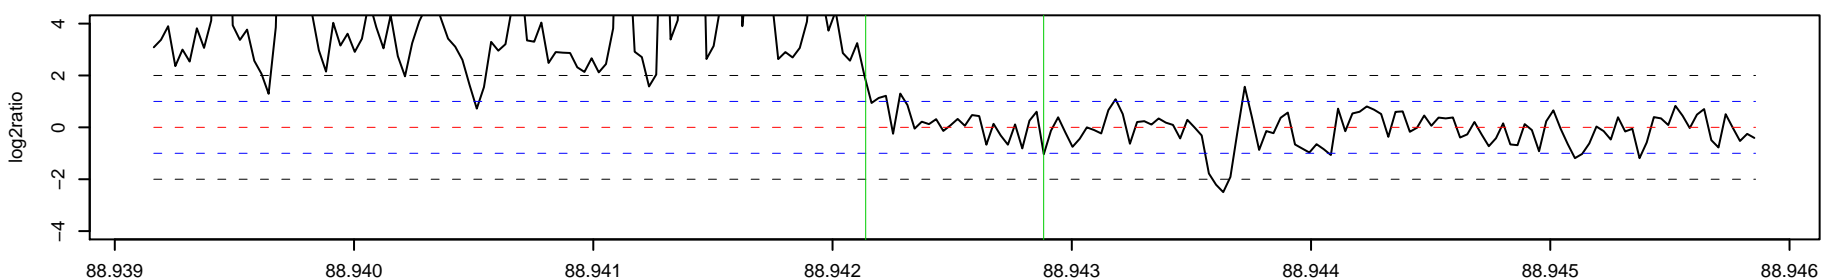

87\_AK1 Chr 2 : 88993617 – 89324196 , 330580 bp (aCGH relative log2ratio= 0.67 )

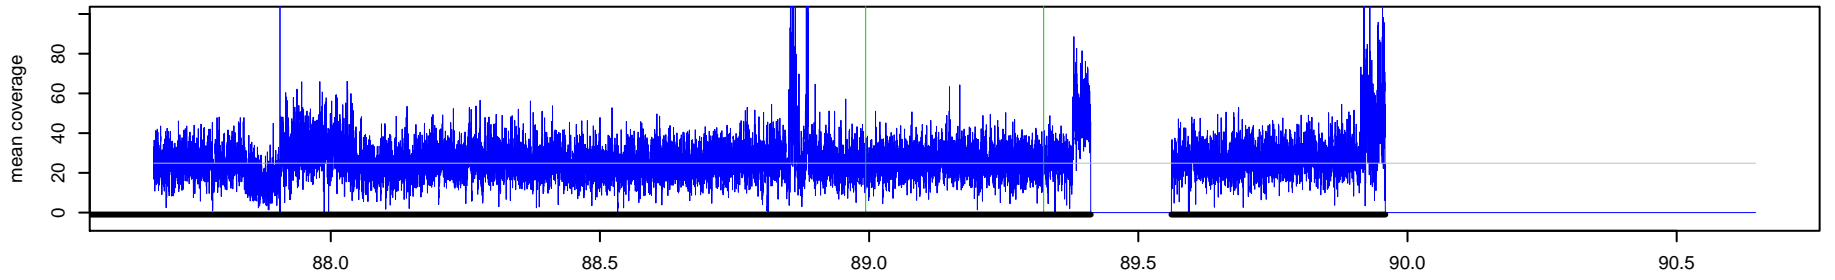

87\_NA10851 Chr 2 : 88993617 – 89324196 , 330580 bp (aCGH relative log2ratio= 0.67 )

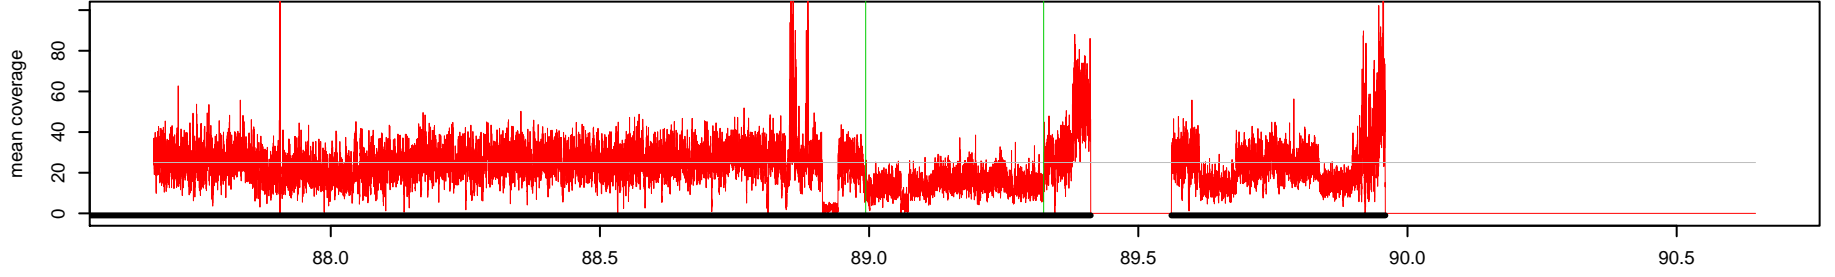

Log2( AK1 read depth / NA10851 read depth)

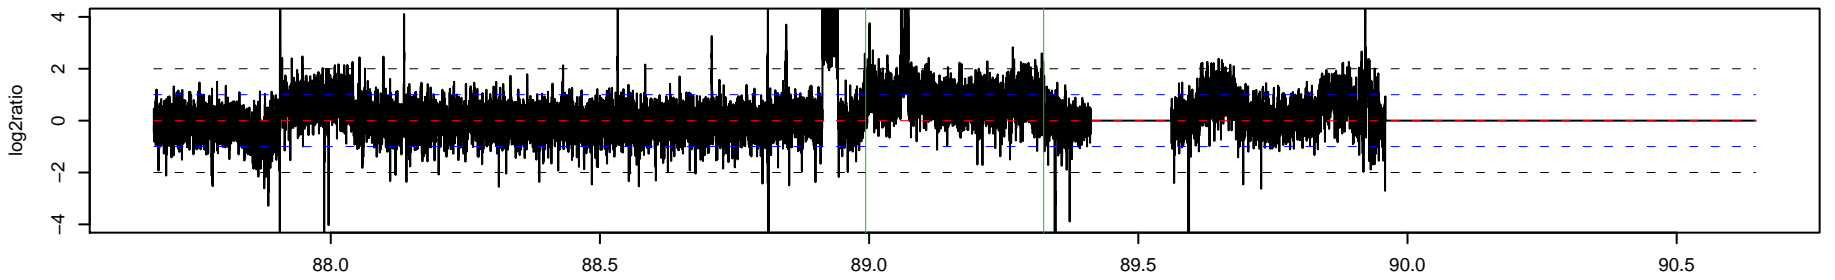

88\_AK1 Chr 2 : 89614897 – 89677226 , 62330 bp (aCGH relative log2ratio= 0.85 )

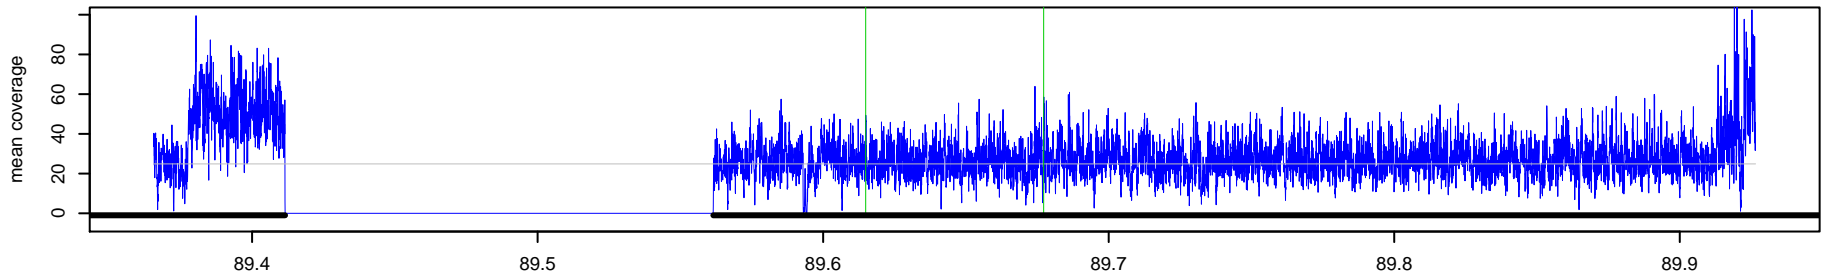

88\_NA10851 Chr 2 : 89614897 – 89677226 , 62330 bp (aCGH relative log2ratio= 0.85 )

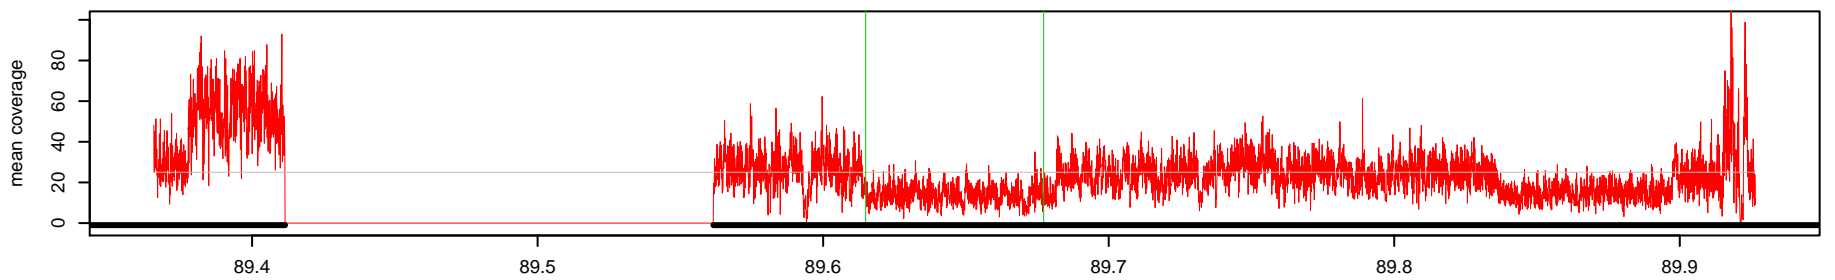

Log2( AK1 read depth / NA10851 read depth)

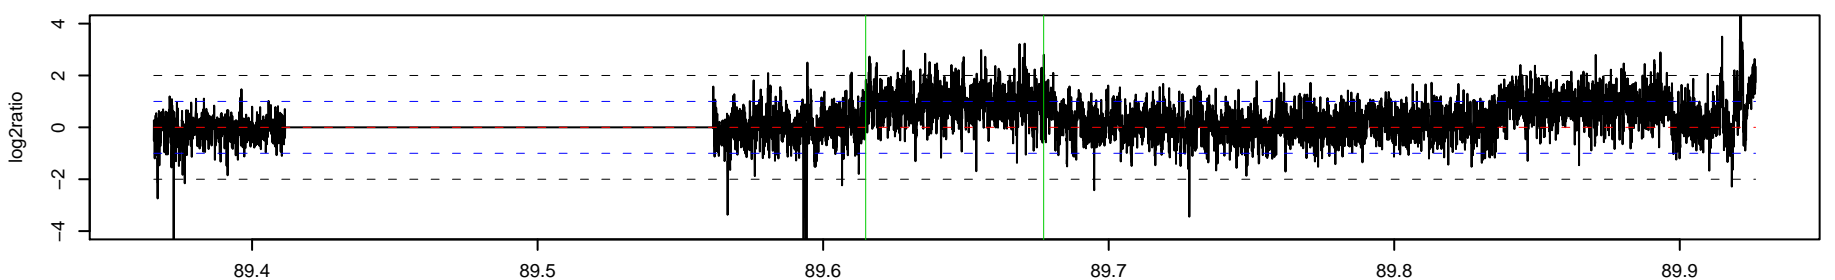



89\_AK1 Chr 2 : 89773095 – 91042320 , 1269226 bp (aCGH relative log2ratio= 0.62 )

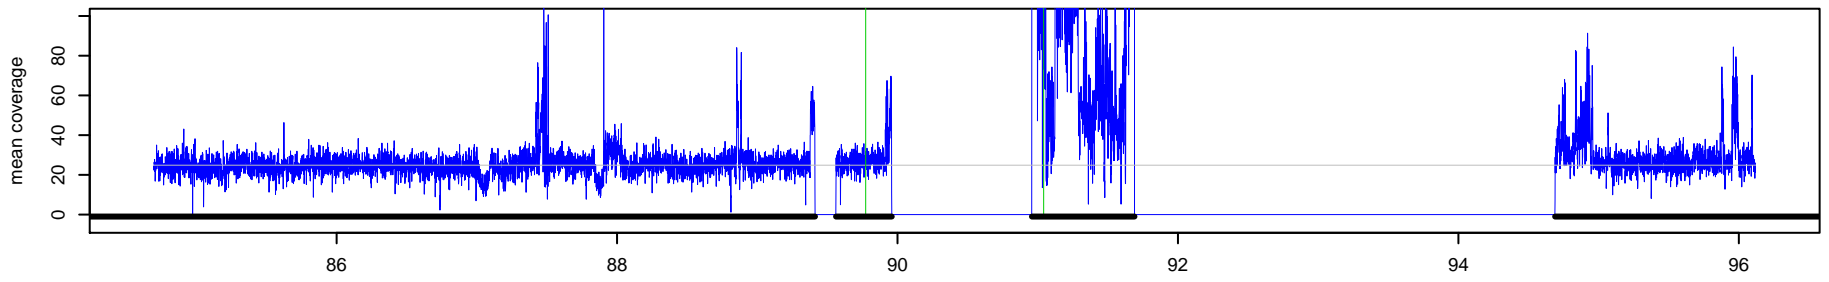

89\_NA10851 Chr 2 : 89773095 – 91042320 , 1269226 bp (aCGH relative log2ratio= 0.62 )

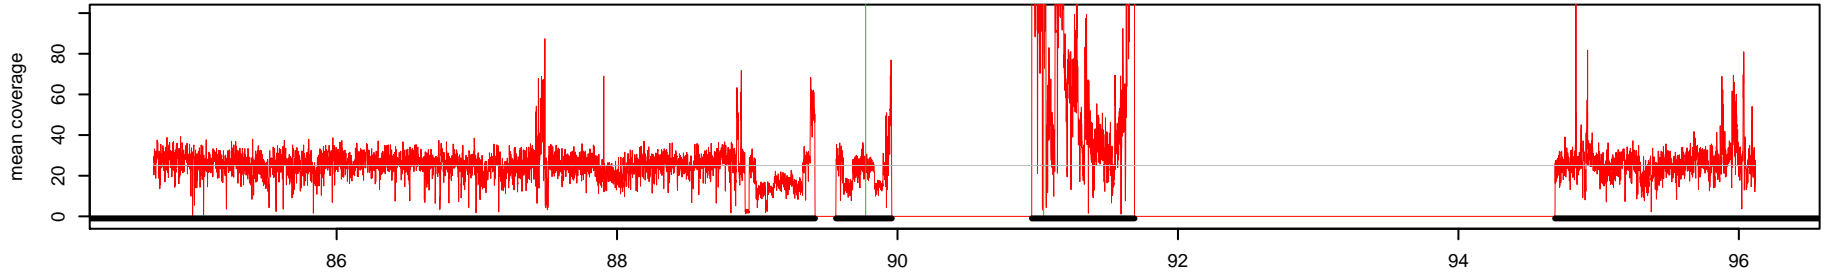

Log2( AK1 read depth / NA10851 read depth)

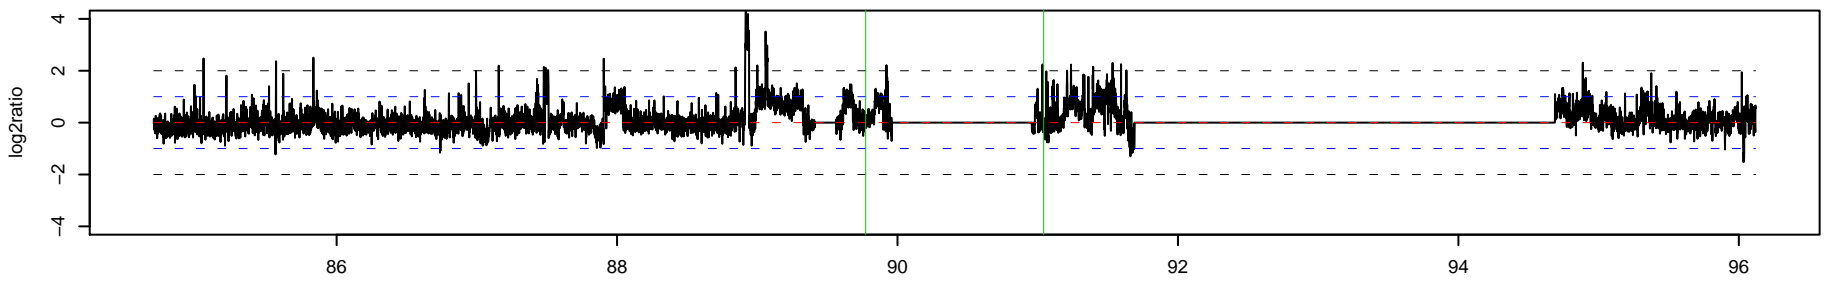

90\_AK1 Chr 2 : 106247062 – 106252210 , 5149 bp (aCGH relative log2ratio= -0.77 )

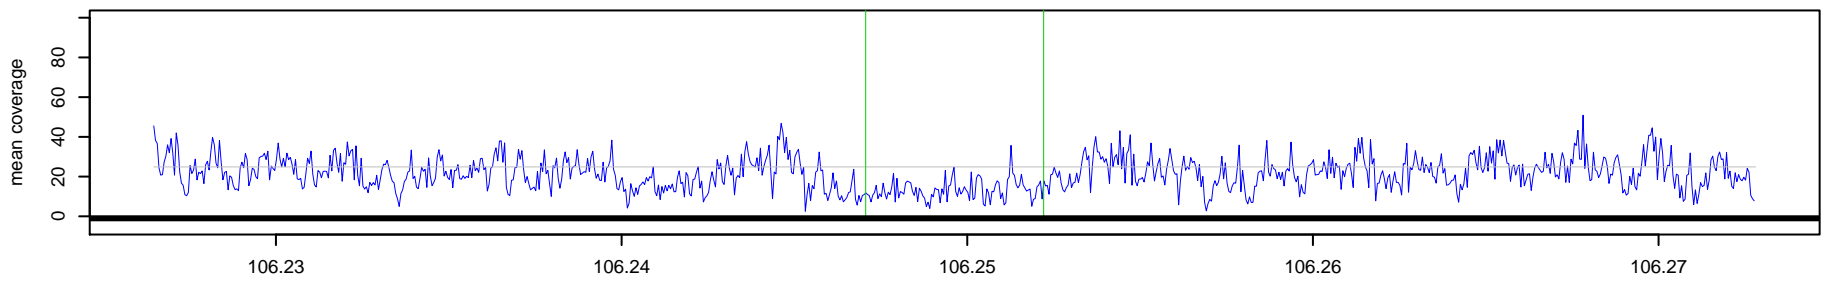

90\_NA10851 Chr 2 : 106247062 – 106252210 , 5149 bp (aCGH relative log2ratio= -0.77 )

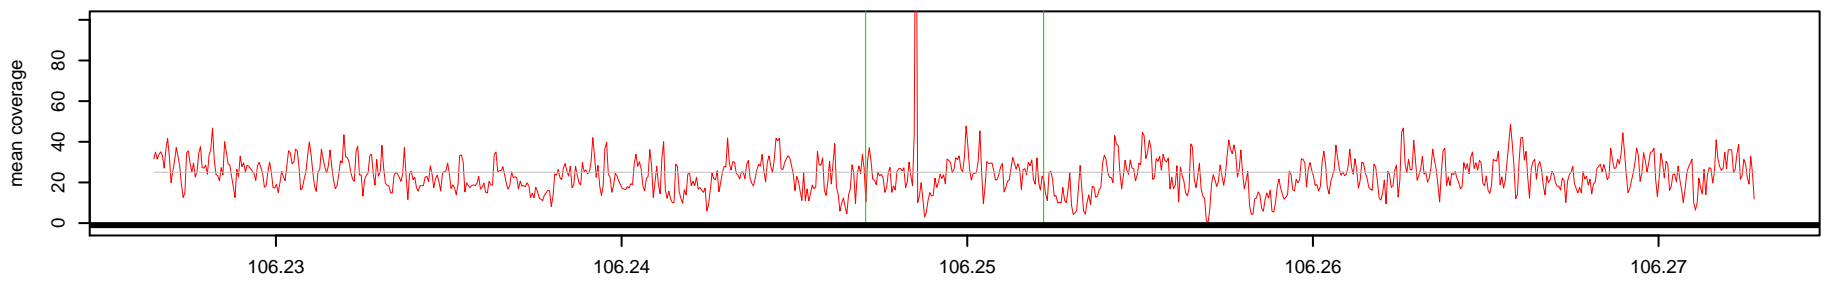

Log2( AK1 read depth / NA10851 read depth)

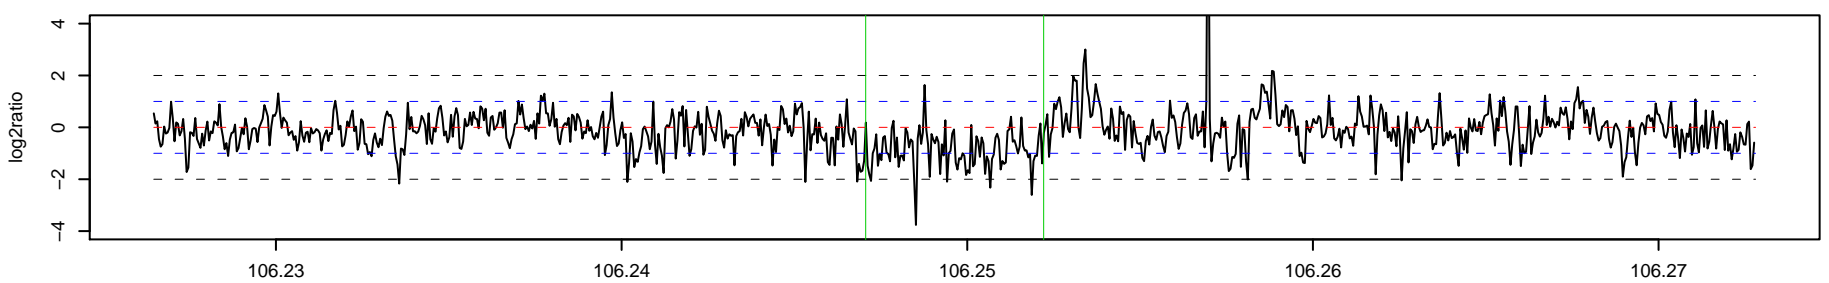

91\_AK1 Chr 2 : 108221742 – 108222642 , 901 bp (aCGH relative log2ratio= 0.76 )

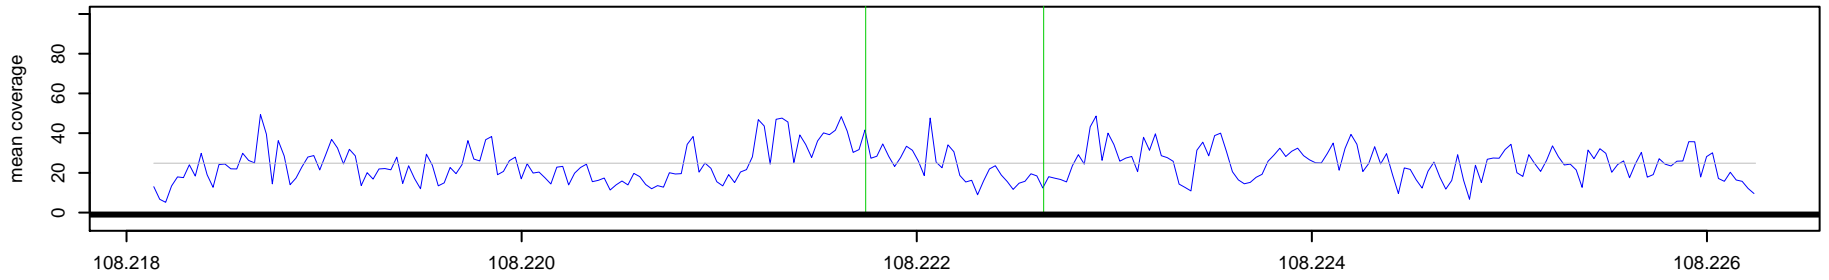

91\_NA10851 Chr 2 : 108221742 – 108222642 , 901 bp (aCGH relative log2ratio= 0.76 )

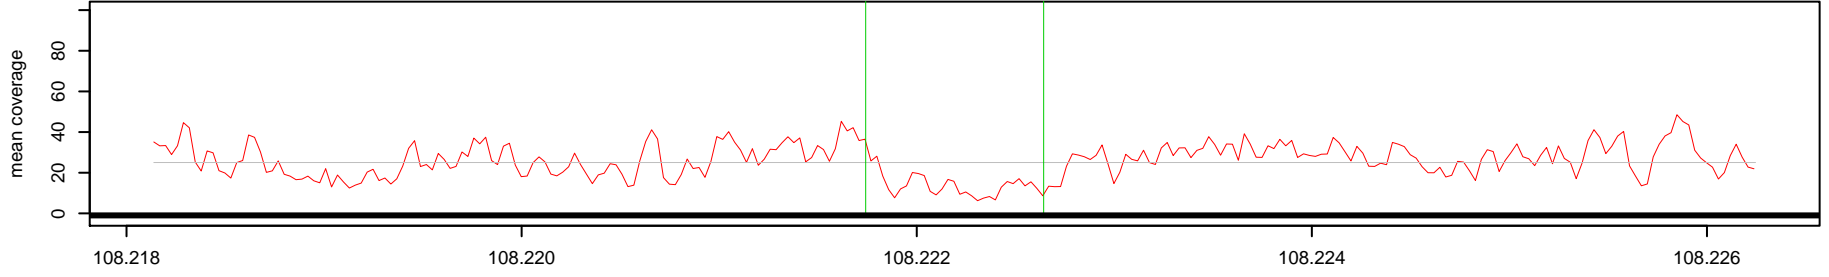

Log2( AK1 read depth / NA10851 read depth)

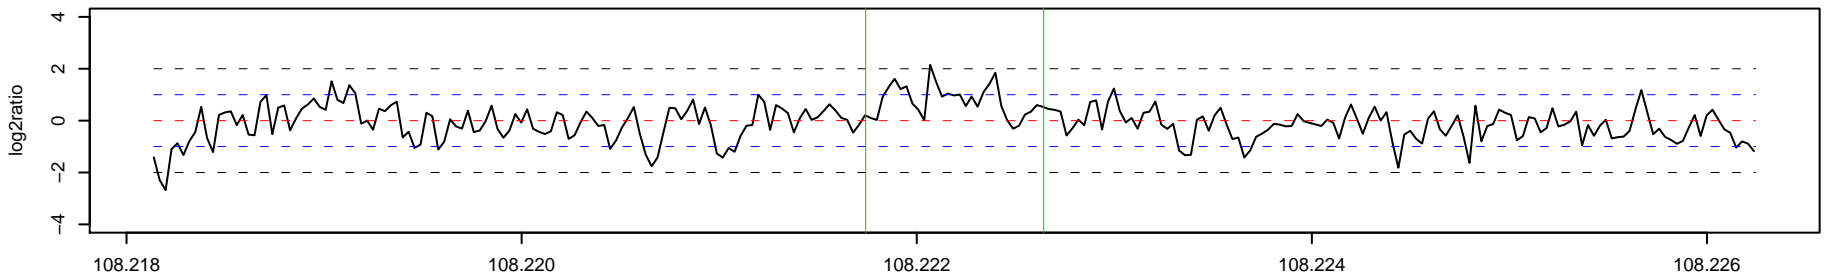

92\_AK1 Chr 2 : 112761750 – 112765422 , 3673 bp (aCGH relative log2ratio= 0.71 )

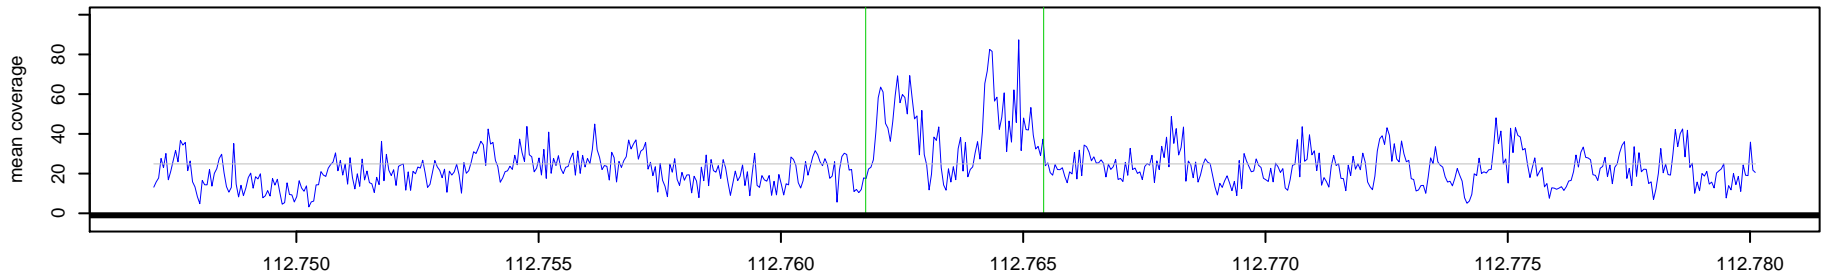

92\_NA10851 Chr 2 : 112761750 – 112765422 , 3673 bp (aCGH relative log2ratio= 0.71 )

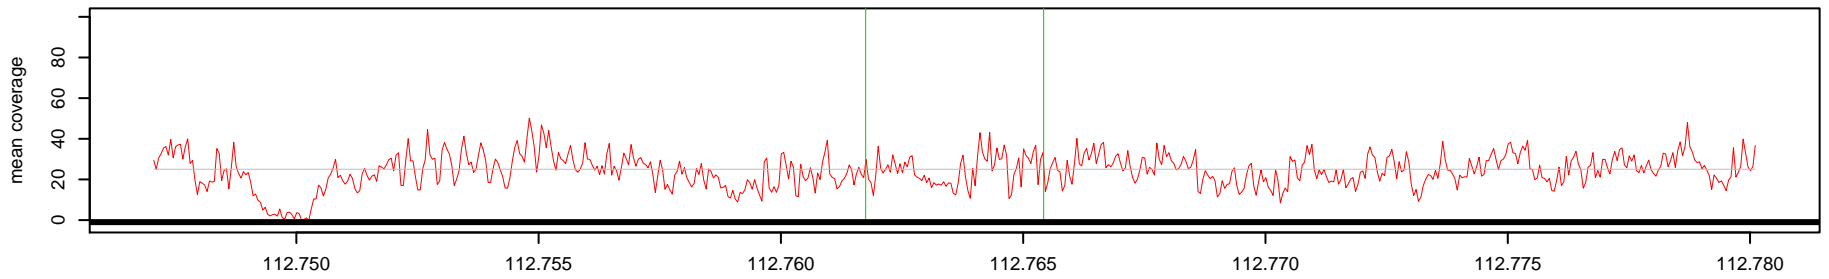

Log2( AK1 read depth / NA10851 read depth)

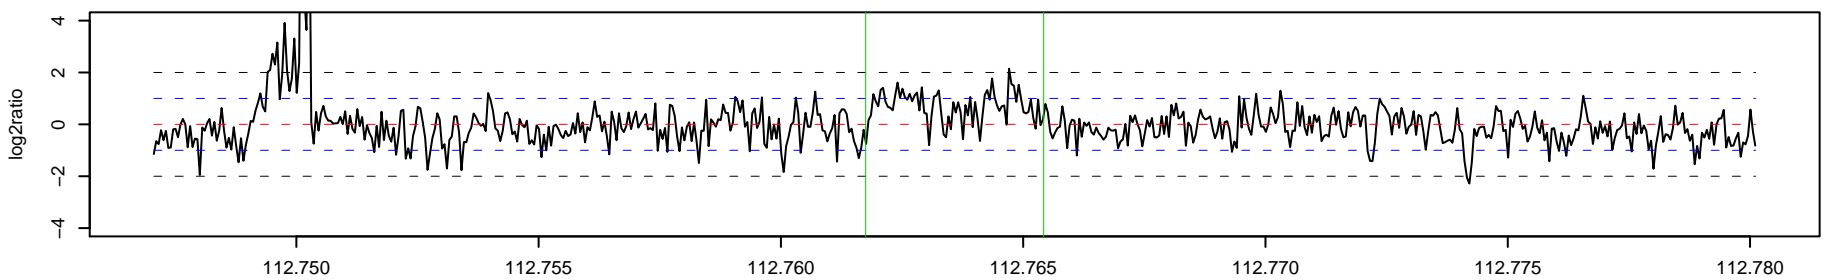

93\_AK1 Chr 2 : 116378517 – 116379116 , 600 bp (aCGH relative log2ratio= 0.96 )

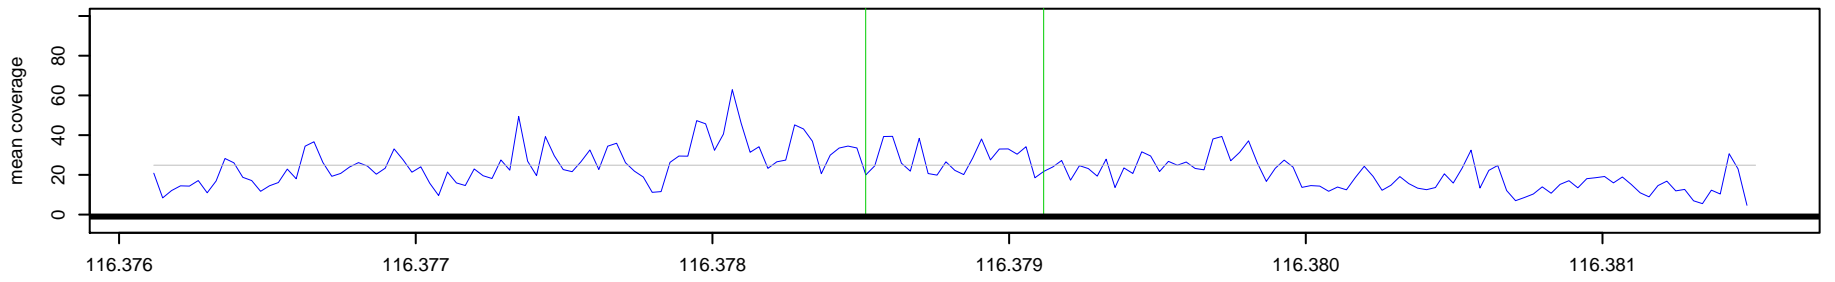

93\_NA10851 Chr 2 : 116378517 – 116379116 , 600 bp (aCGH relative log2ratio= 0.96 )

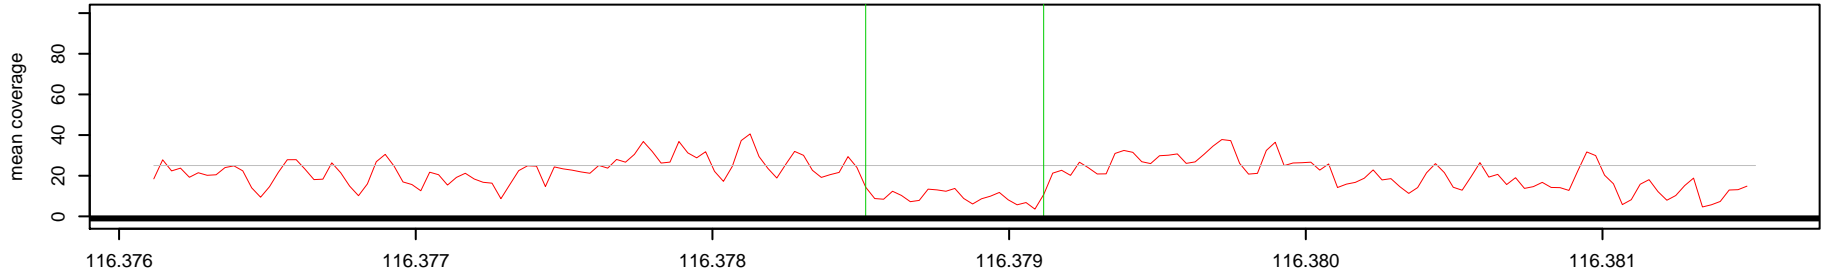

Log2( AK1 read depth / NA10851 read depth)

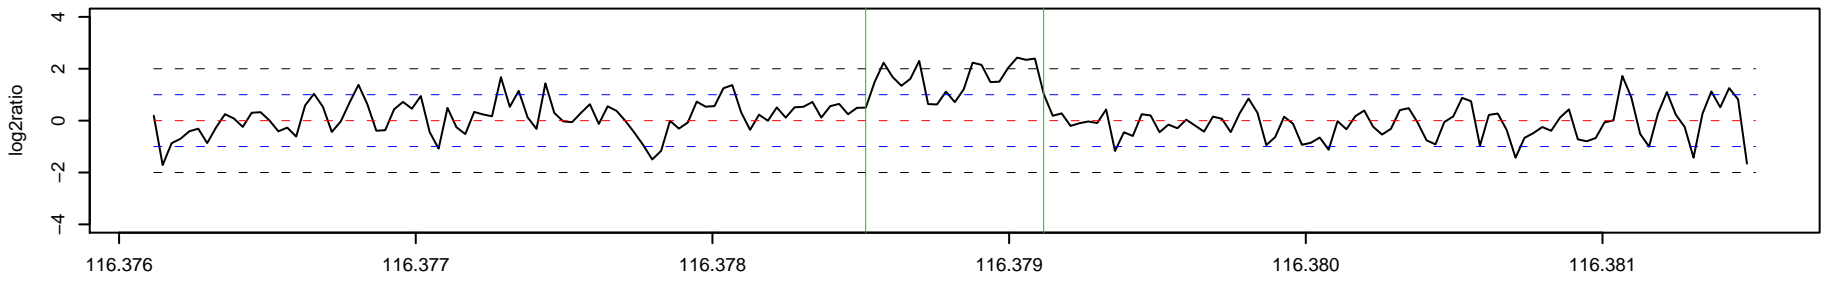

94\_AK1 Chr 2 : 118597829 – 118598662 , 834 bp (aCGH relative log2ratio= 0.67 )

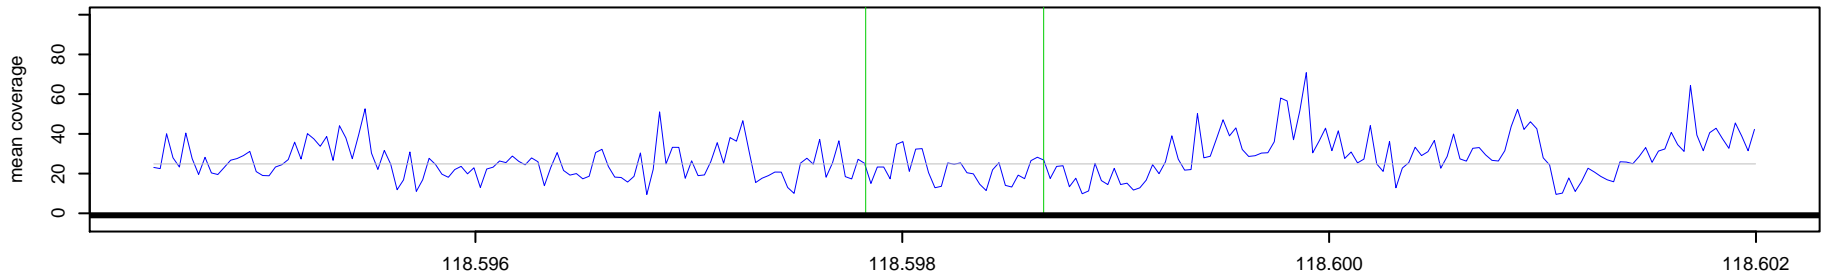

94\_NA10851 Chr 2 : 118597829 – 118598662 , 834 bp (aCGH relative log2ratio= 0.67 )

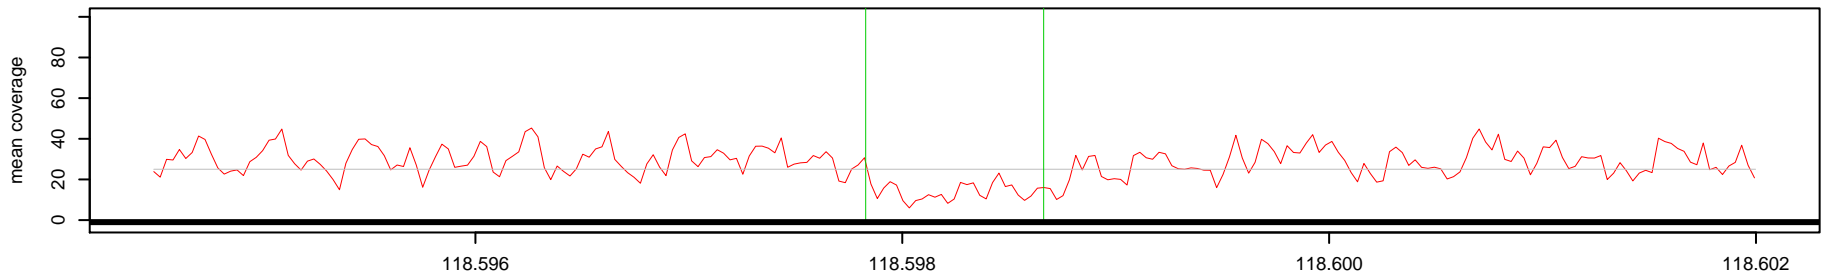

Log2( AK1 read depth / NA10851 read depth)

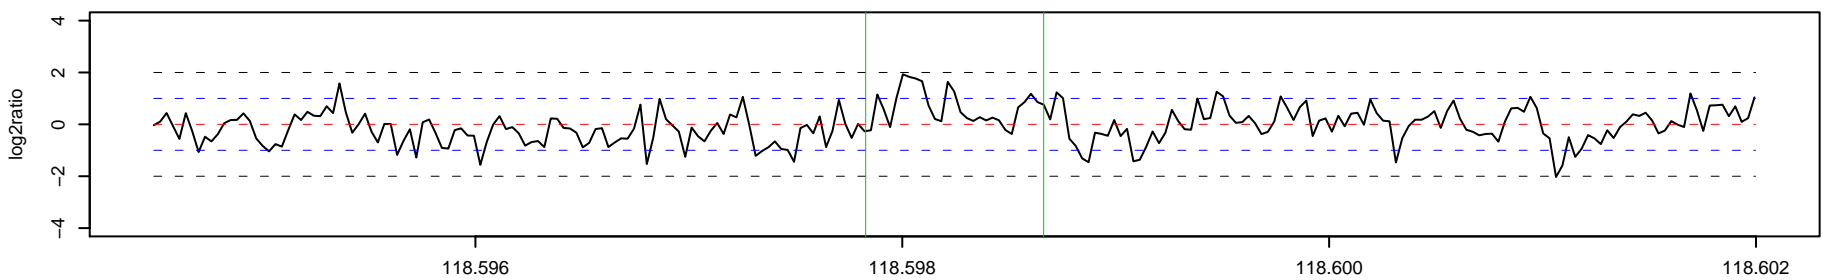

95\_AK1 Chr 2 : 119763014 – 119766888 , 3875 bp (aCGH relative log2ratio= -0.88 )

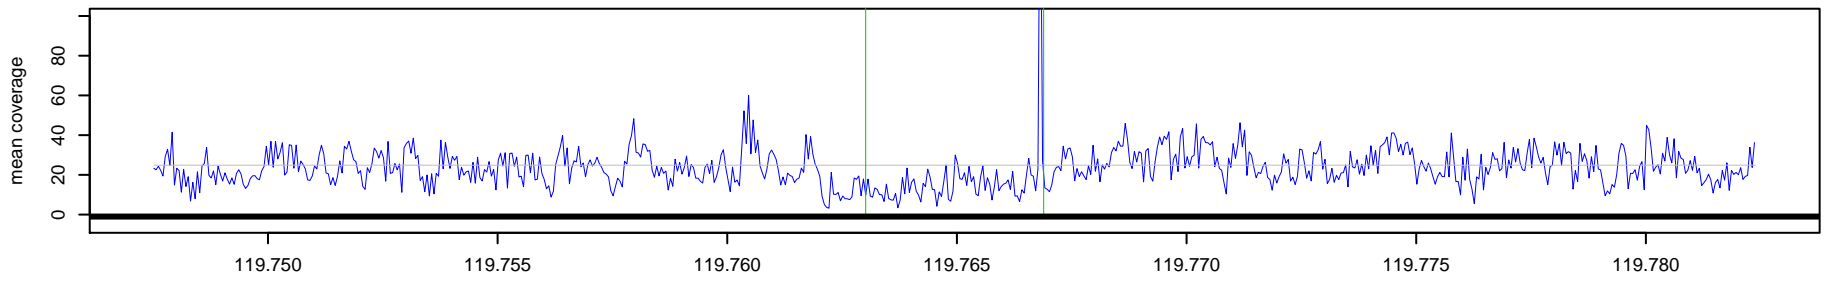

95\_NA10851 Chr 2 : 119763014 – 119766888 , 3875 bp (aCGH relative log2ratio= -0.88 )

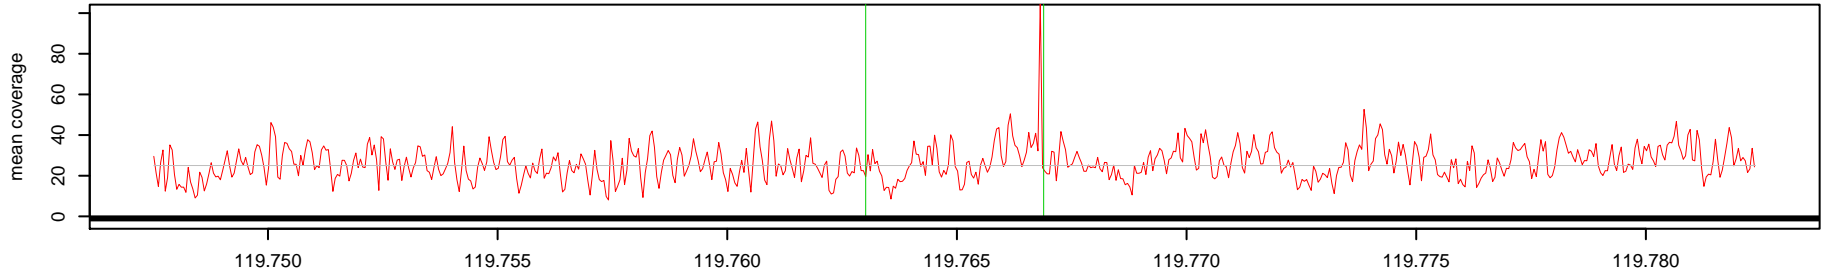

Log2( AK1 read depth / NA10851 read depth)

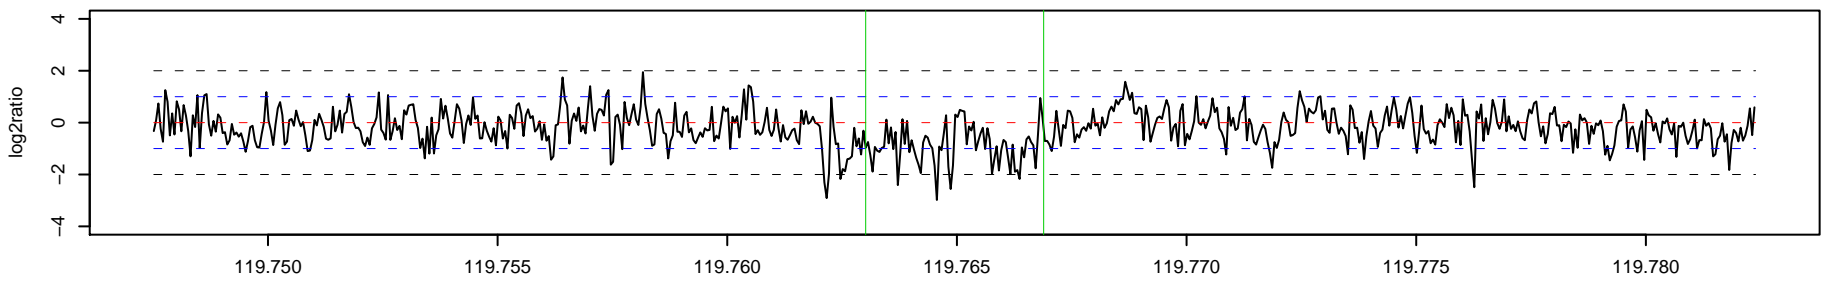

96\_AK1 Chr 2 : 123193830 – 123198999 , 5170 bp (aCGH relative log2ratio= -0.95 )

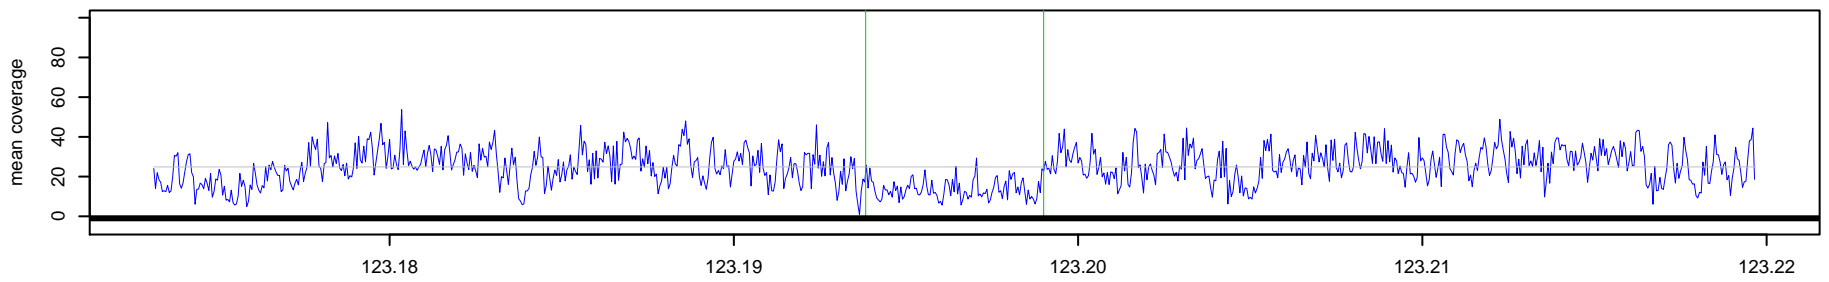

96\_NA10851 Chr 2 : 123193830 – 123198999 , 5170 bp (aCGH relative log2ratio= -0.95 )

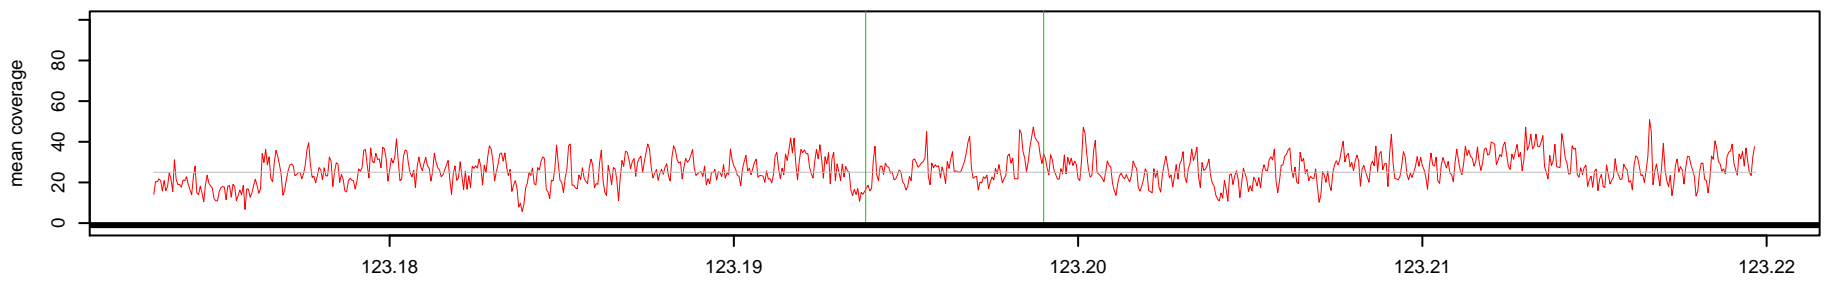

Log2( AK1 read depth / NA10851 read depth)

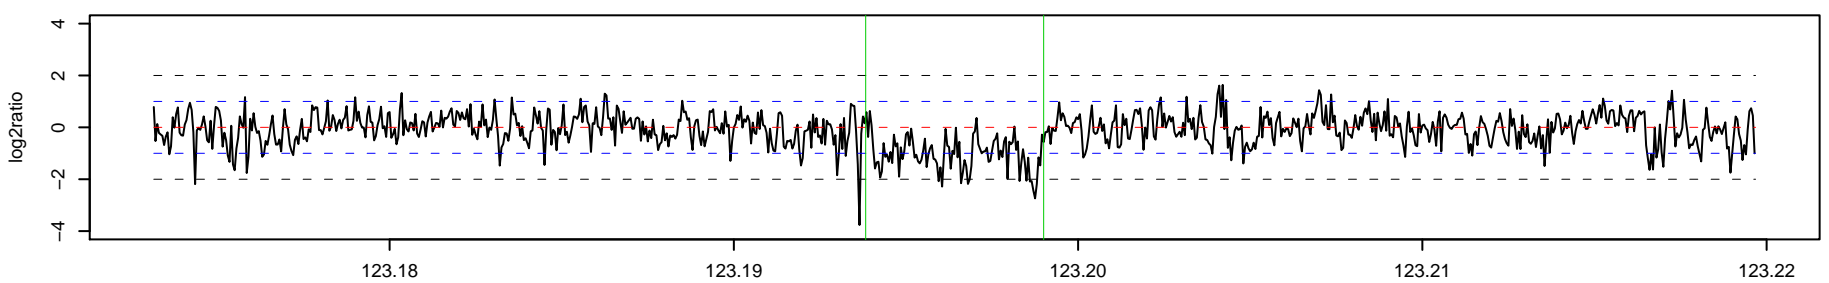

97\_AK1 Chr 2 : 126160360 – 126168275 , 7916 bp (aCGH relative log2ratio= -3.25 )

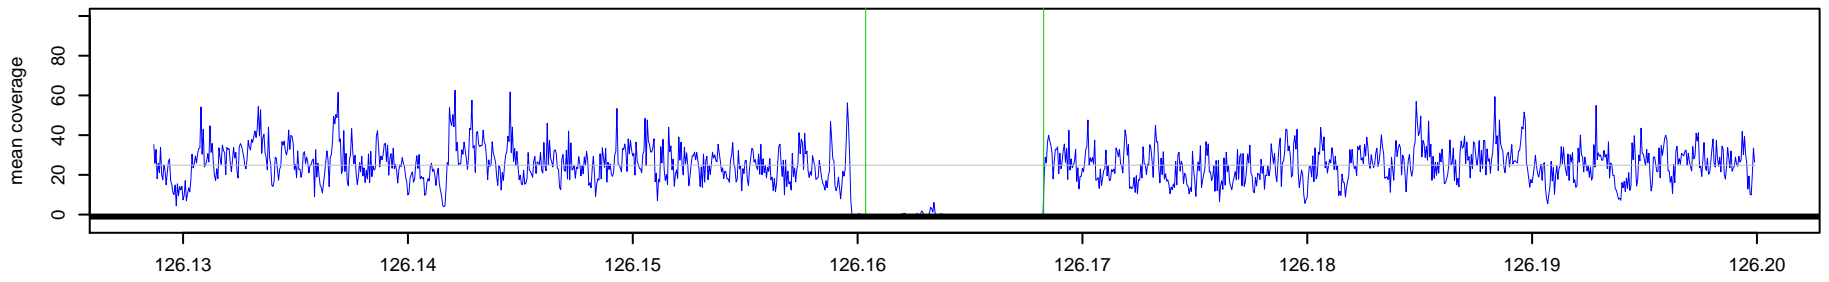

97\_NA10851 Chr 2 : 126160360 – 126168275 , 7916 bp (aCGH relative log2ratio= -3.25 )

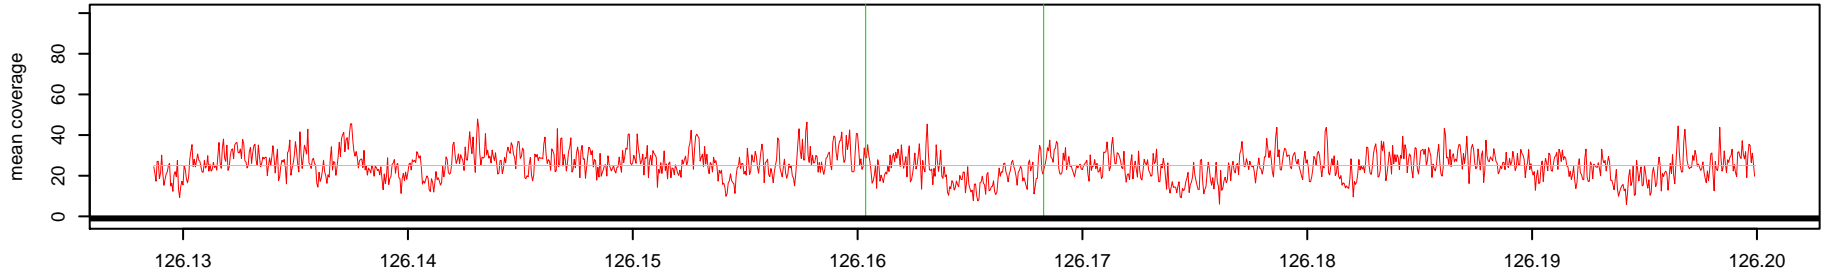

Log2( AK1 read depth / NA10851 read depth)

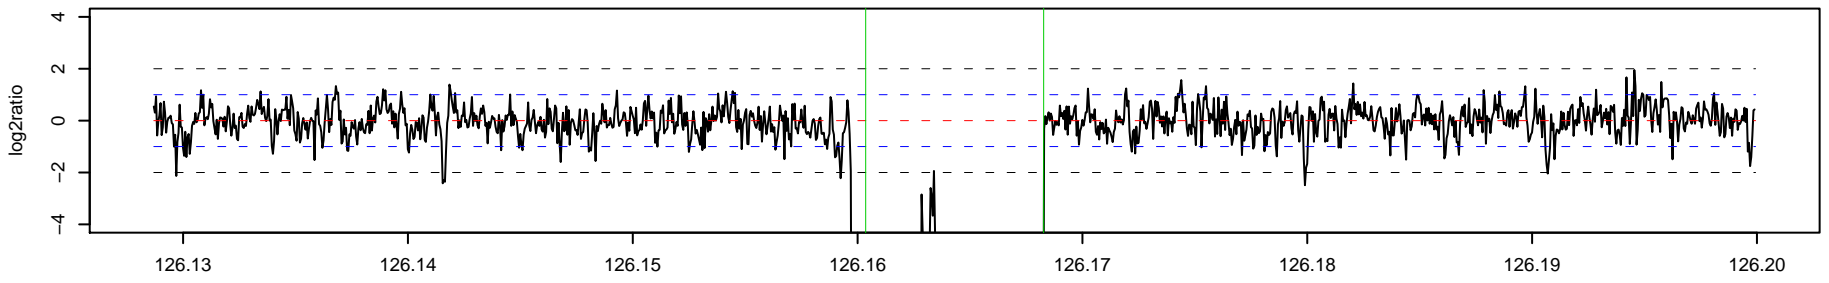

98\_AK1 Chr 2 : 129354967 – 129358260 , 3294 bp (aCGH relative log2ratio= -3.83 )

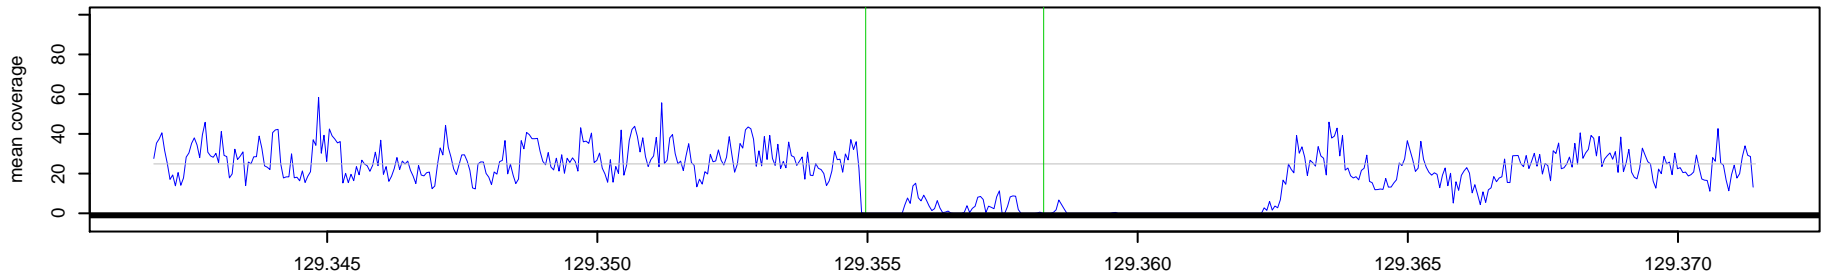

98\_NA10851 Chr 2 : 129354967 – 129358260 , 3294 bp (aCGH relative log2ratio= -3.83 )

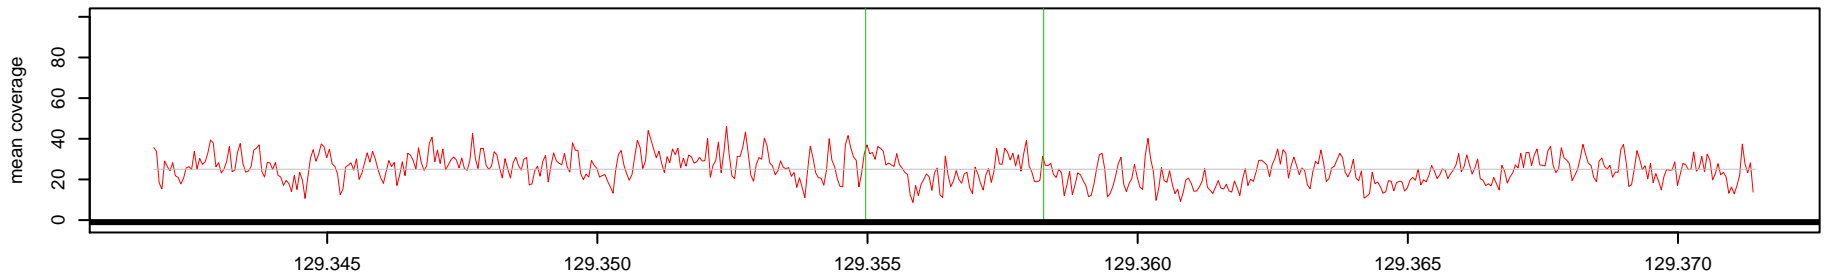

Log2( AK1 read depth / NA10851 read depth)

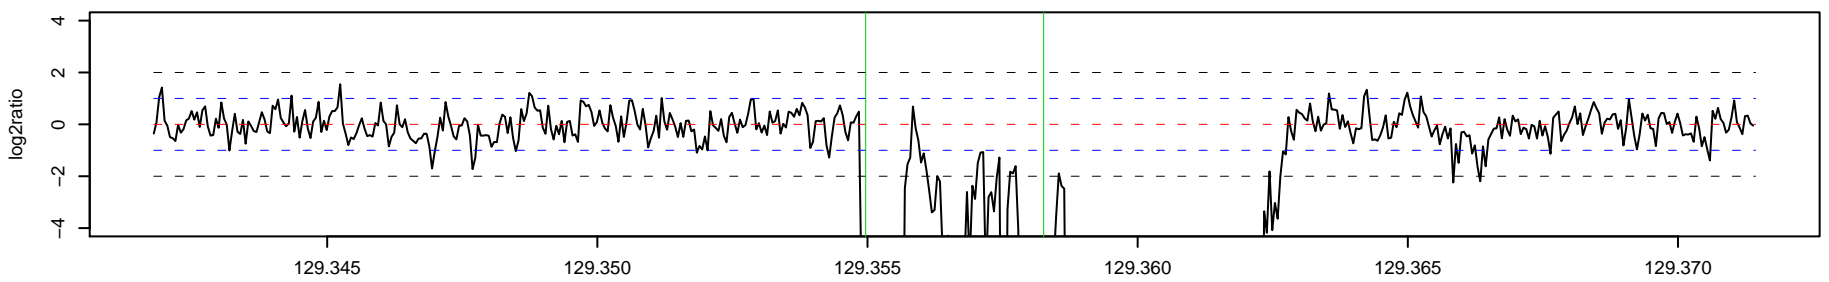

99\_AK1 Chr 2 : 142349893 – 142350341 , 449 bp (aCGH relative log2ratio= 0.50 )

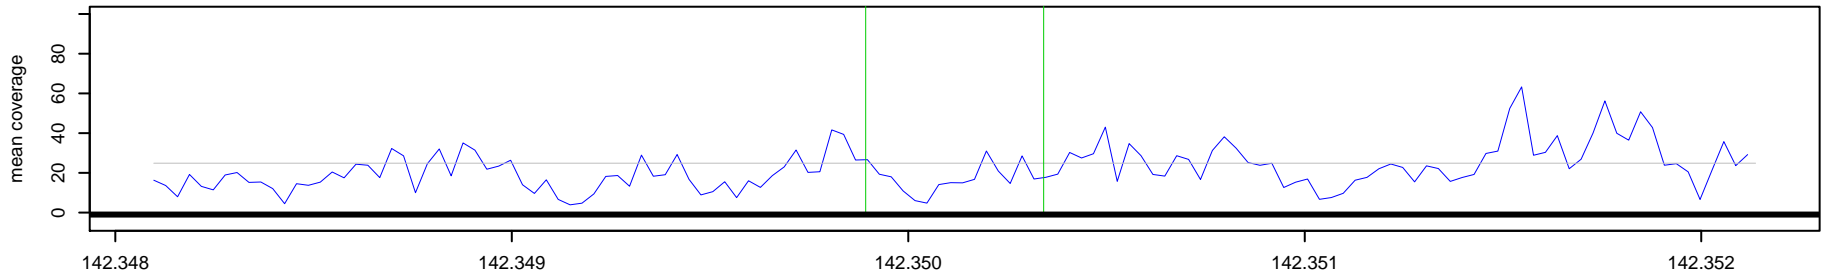

99\_NA10851 Chr 2 : 142349893 – 142350341 , 449 bp (aCGH relative log2ratio= 0.50 )

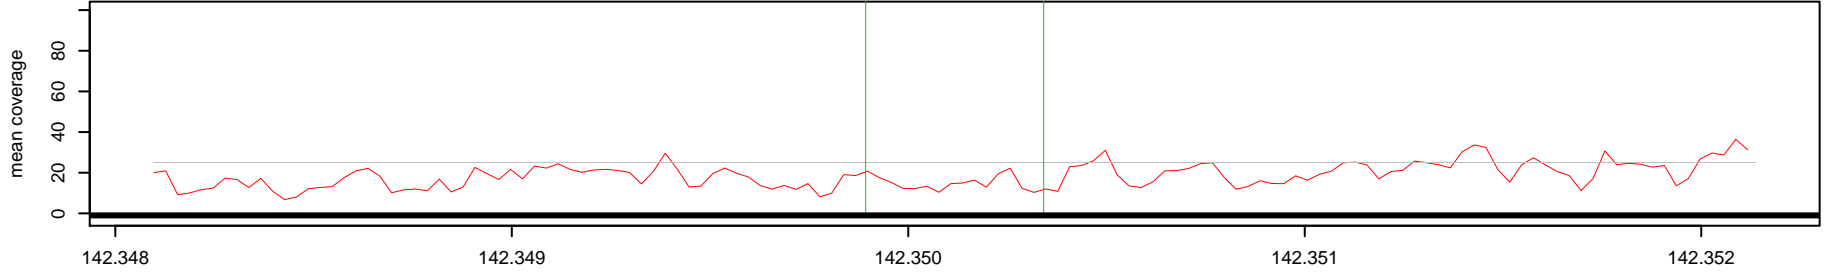

Log2( AK1 read depth / NA10851 read depth)

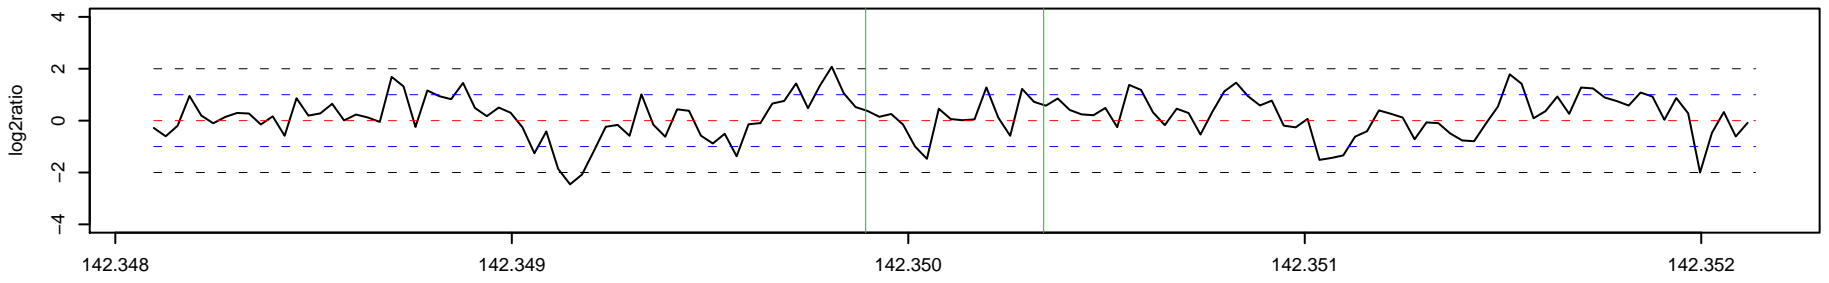

100\_AK1 Chr 2 : 143727239 – 143727752 , 514 bp (aCGH relative log2ratio= 0.67 )

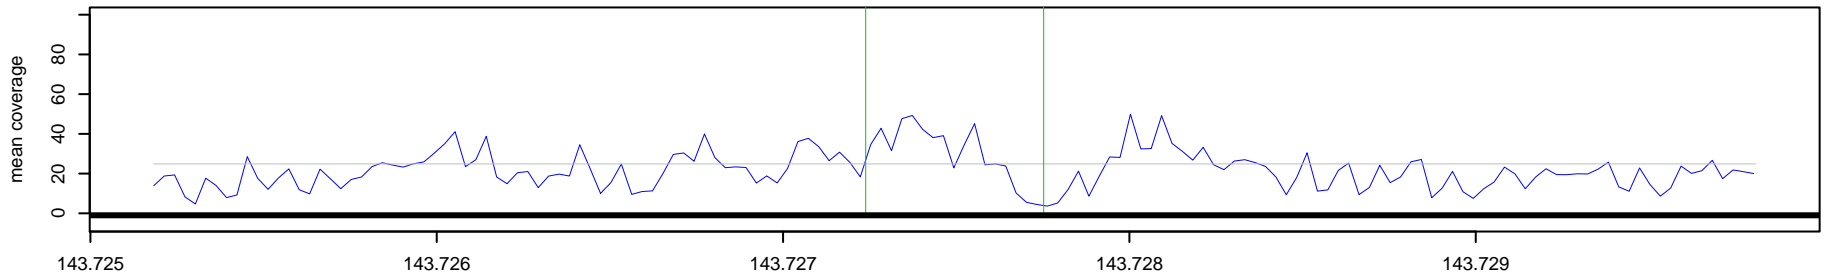

100\_NA10851 Chr 2 : 143727239 – 143727752 , 514 bp (aCGH relative log2ratio= 0.67 )

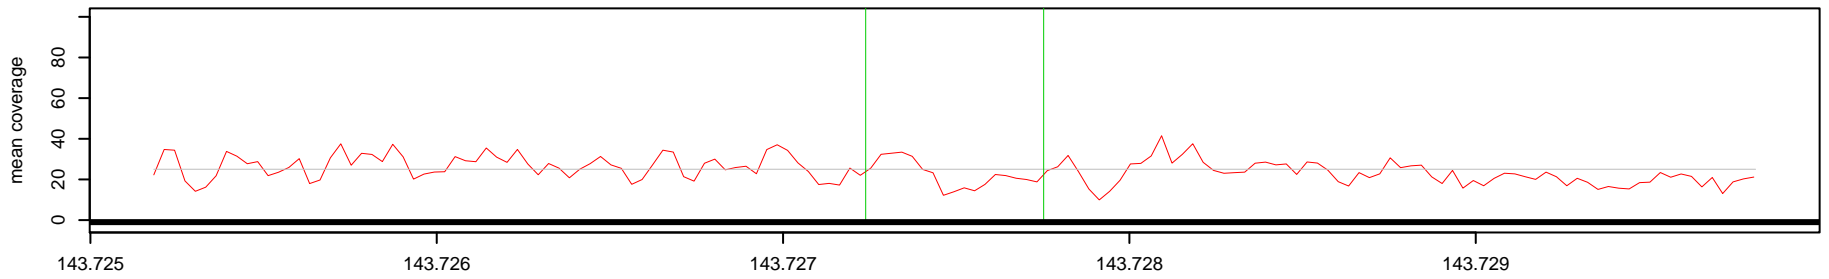

Log2( AK1 read depth / NA10851 read depth)

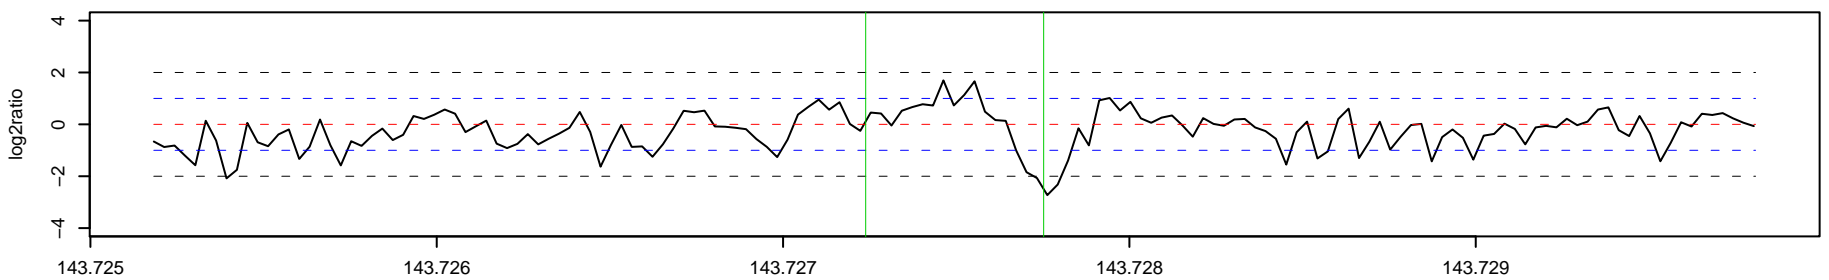

101 \_ AK1 Chr 2 : 153503913 – 153507973 , 4061 bp (aCGH relative log2ratio= 0.74 )

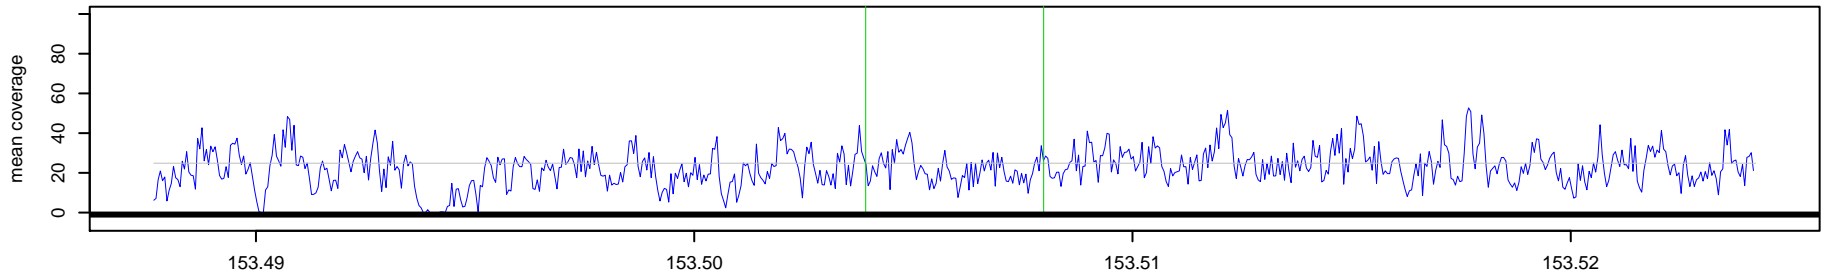

101 \_ NA10851 Chr 2 : 153503913 – 153507973 , 4061 bp (aCGH relative log2ratio= 0.74 )

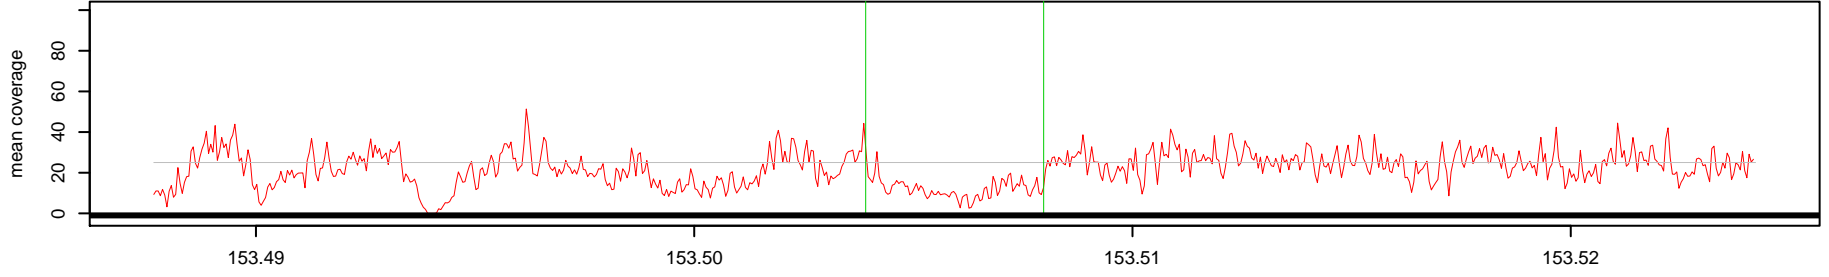

Log2( AK1 read depth / NA10851 read depth)

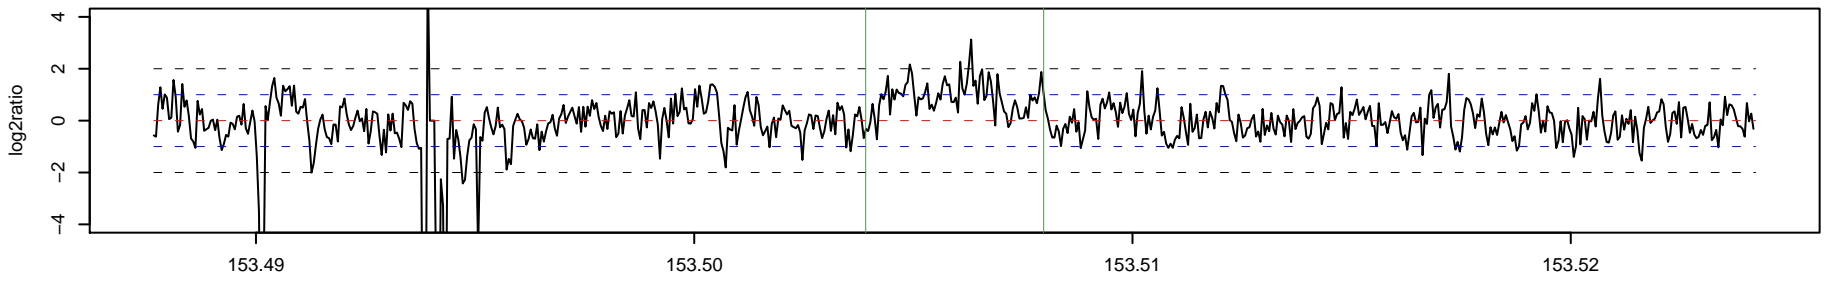

102 \_ AK1 Chr 2 : 154604529 – 154607369 , 2841 bp (aCGH relative log2ratio= 0.95 )

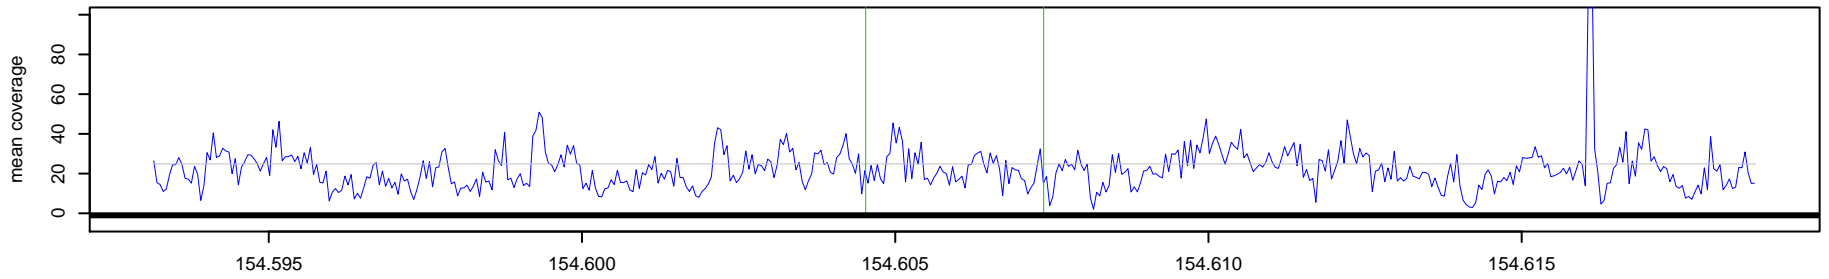

102 \_ NA10851 Chr 2 : 154604529 – 154607369 , 2841 bp (aCGH relative log2ratio= 0.95 )

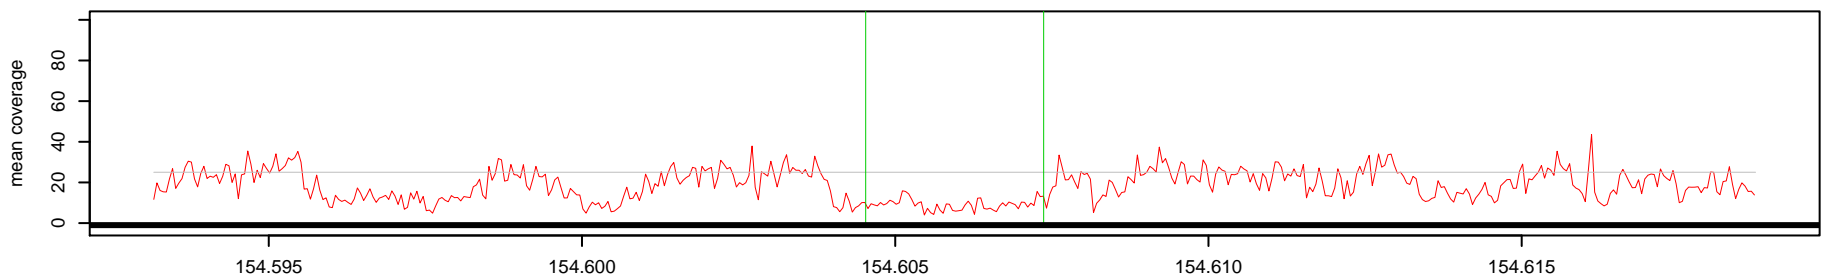

Log2( AK1 read depth / NA10851 read depth)

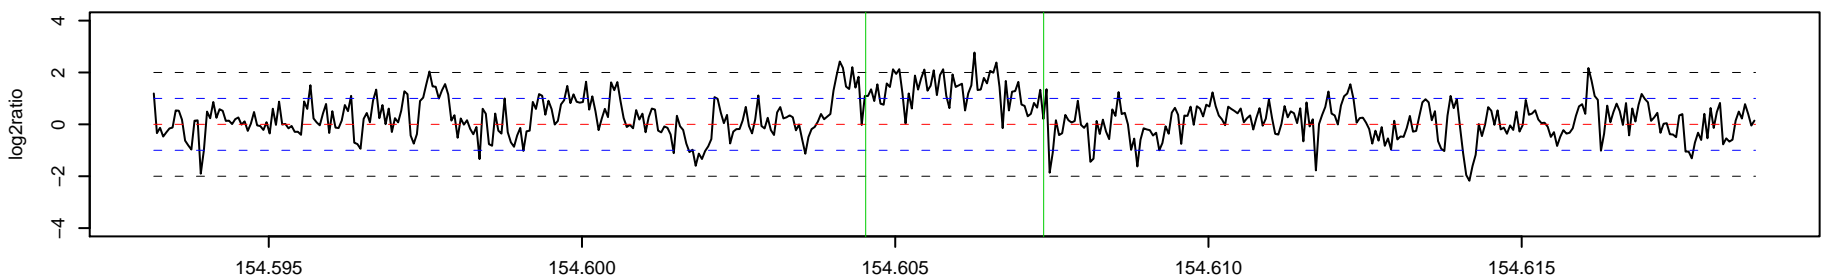

103\_AK1 Chr 2 : 159330427 – 159330967 , 541 bp (aCGH relative log2ratio= 0.72 )

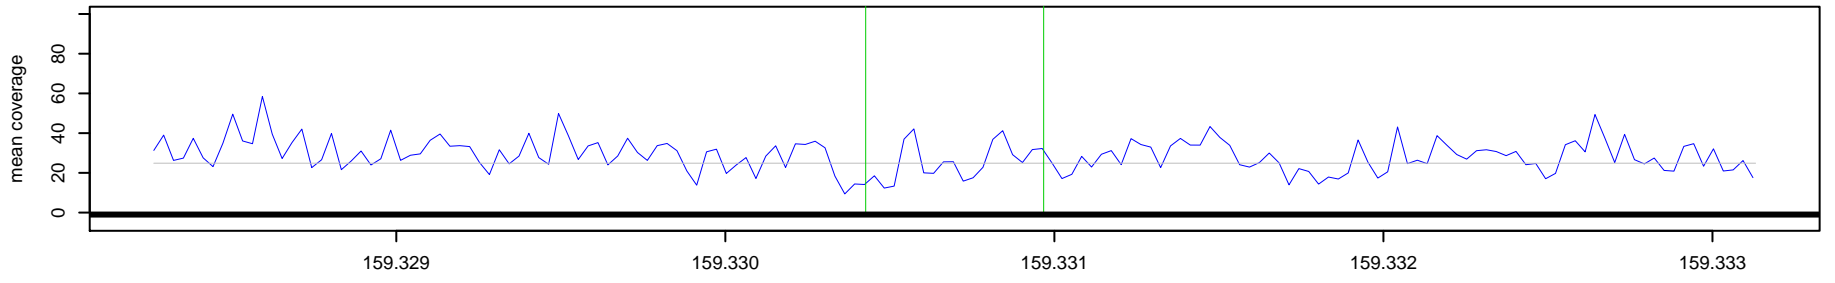

103\_NA10851 Chr 2 : 159330427 – 159330967 , 541 bp (aCGH relative log2ratio= 0.72 )

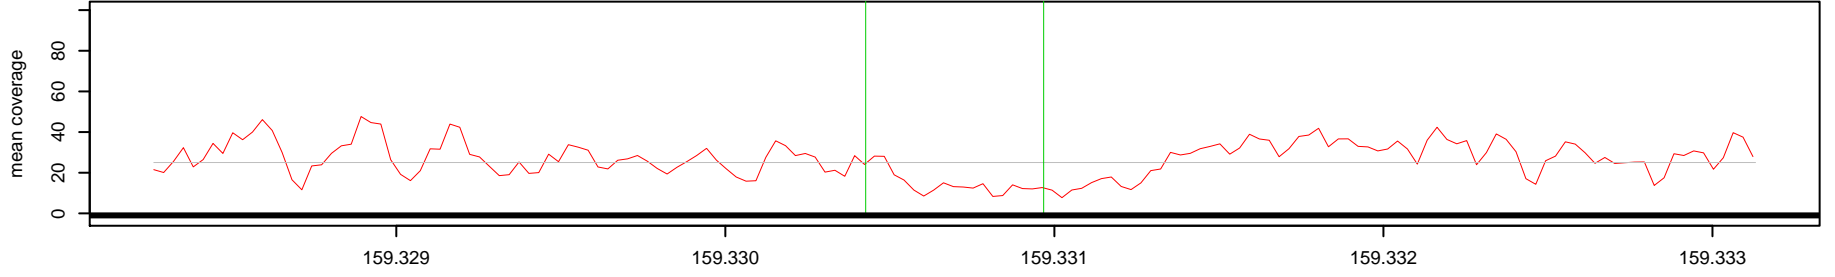

Log2( AK1 read depth / NA10851 read depth)

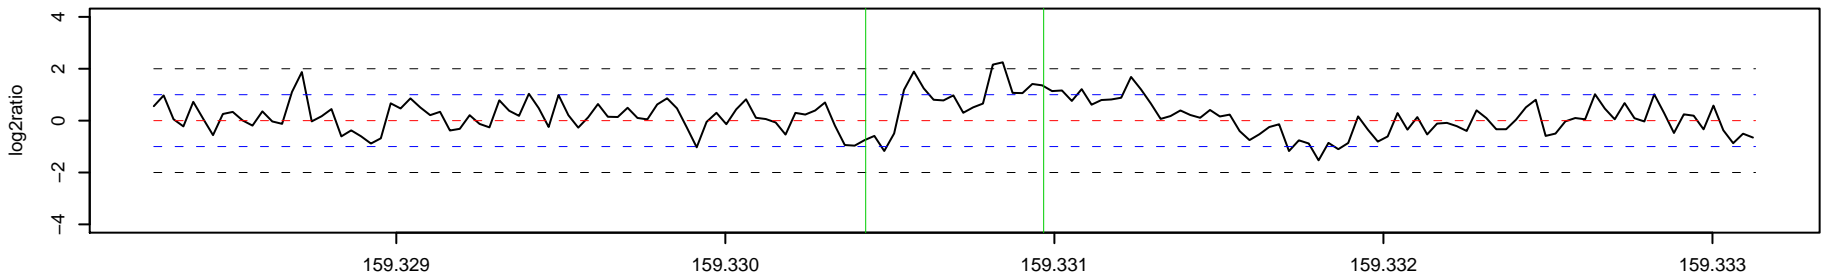

104\_AK1 Chr 2 : 159668057 – 159669191 , 1135 bp (aCGH relative log2ratio= 1.45 )

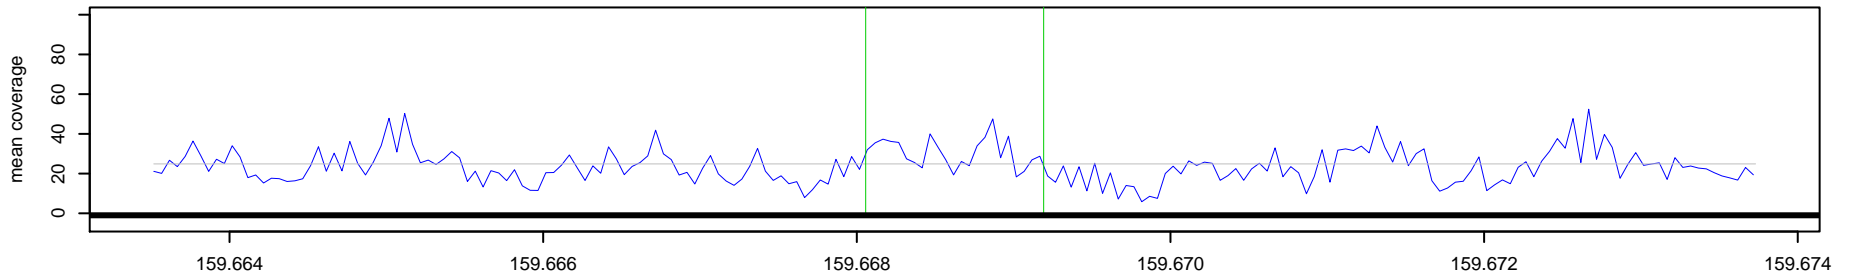

104\_NA10851 Chr 2 : 159668057 – 159669191 , 1135 bp (aCGH relative log2ratio= 1.45 )

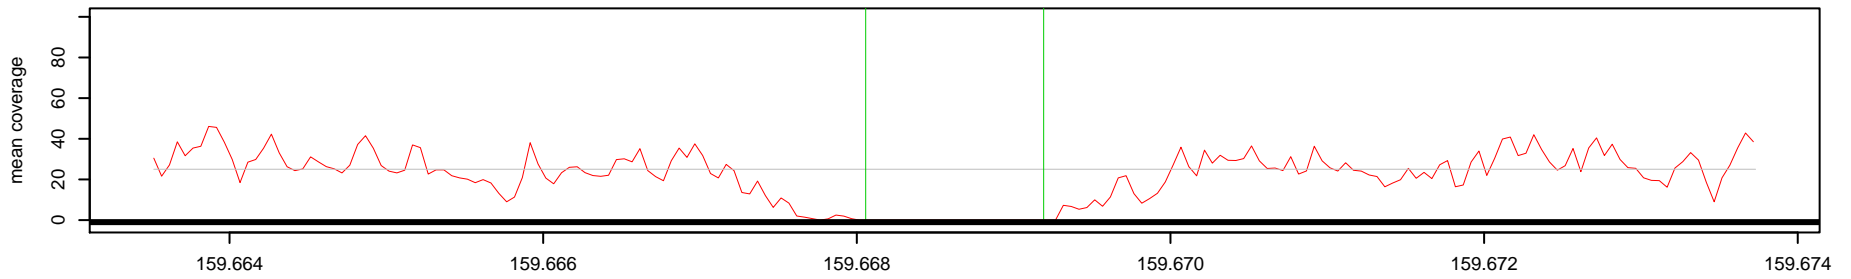

Log2( AK1 read depth / NA10851 read depth)

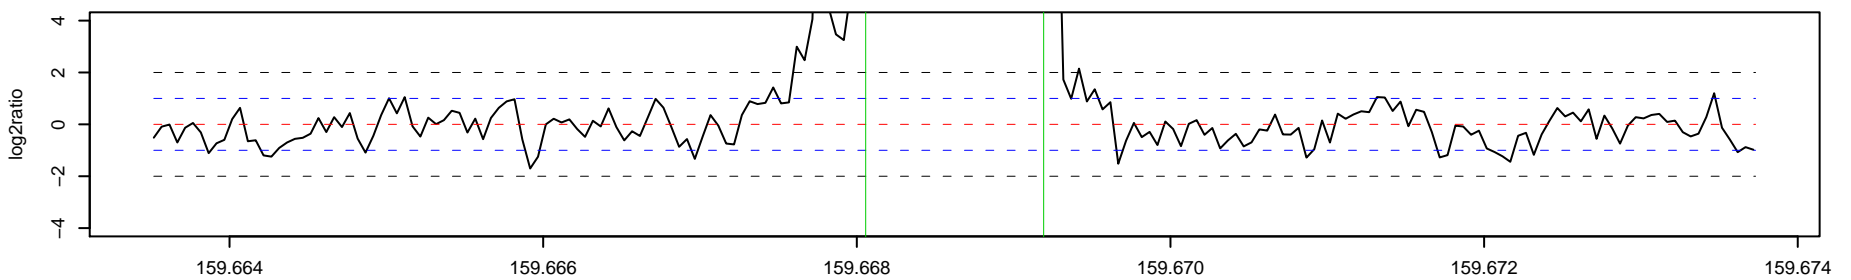



105\_AK1 Chr 2 : 159856357 – 159856932 , 576 bp (aCGH relative log2ratio= 0.65 )

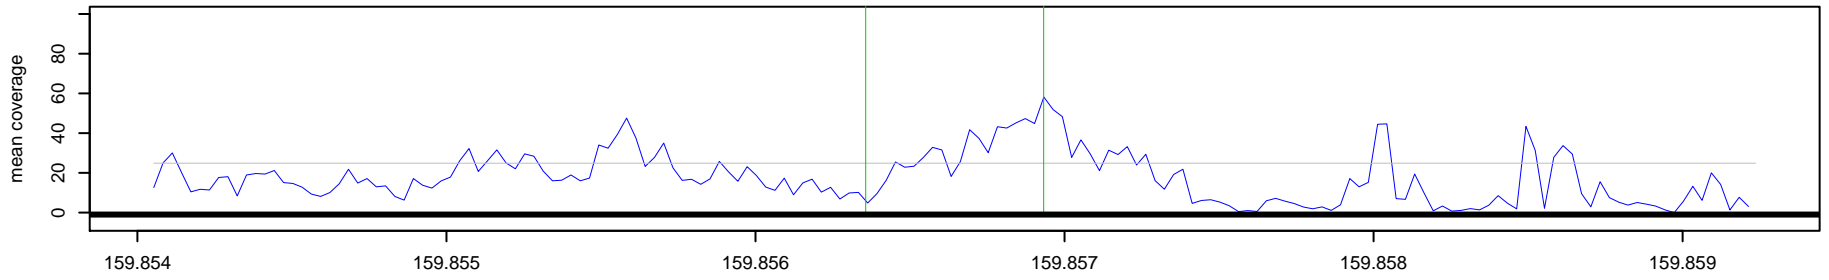

105\_NA10851 Chr 2 : 159856357 – 159856932 , 576 bp (aCGH relative log2ratio= 0.65 )

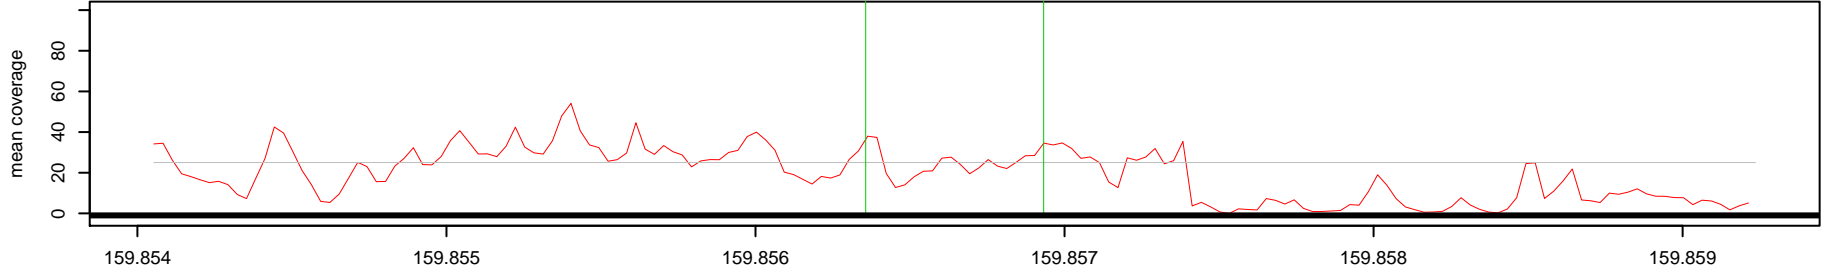

Log2( AK1 read depth / NA10851 read depth)

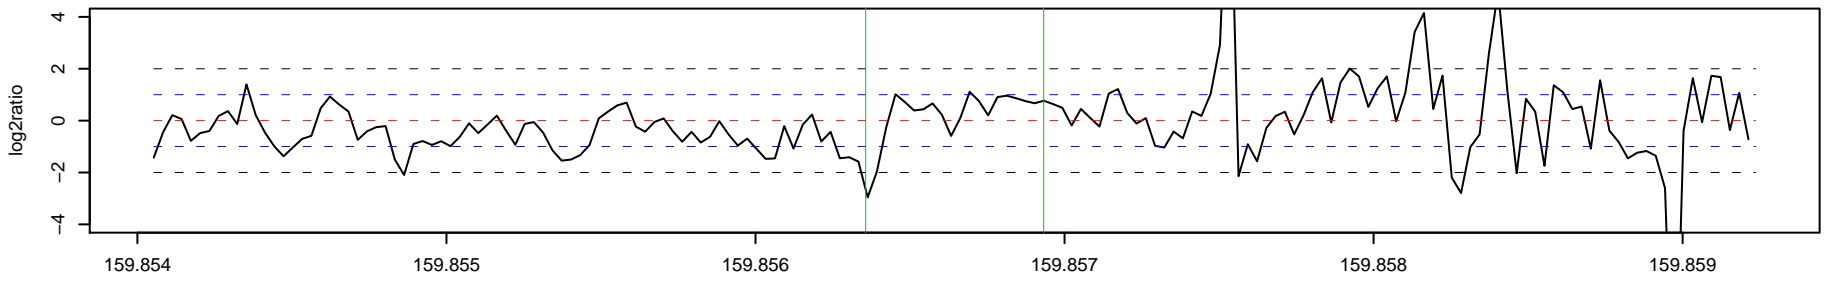

106\_AK1 Chr 2 : 165540383 – 165565476 , 25094 bp (aCGH relative log2ratio= 0.36 )

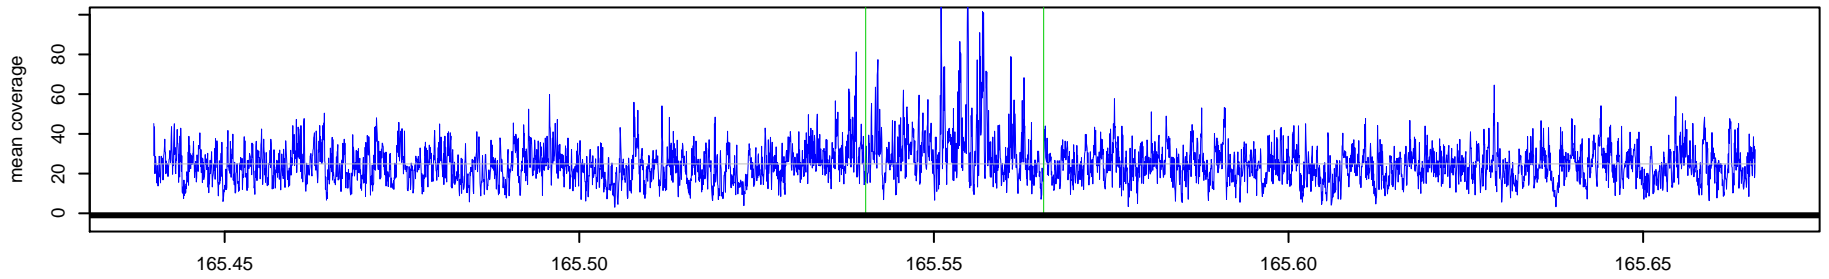

106\_NA10851 Chr 2 : 165540383 – 165565476 , 25094 bp (aCGH relative log2ratio= 0.36 )

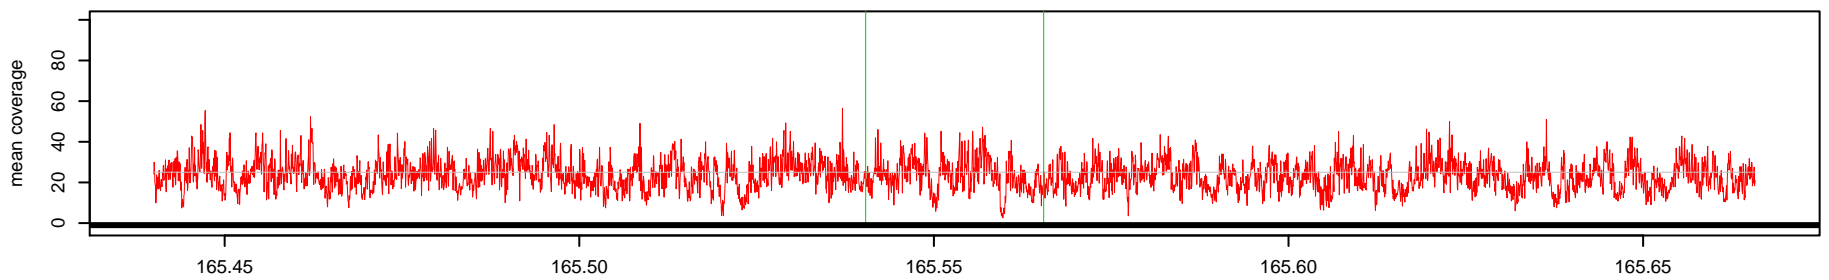

Log2( AK1 read depth / NA10851 read depth)

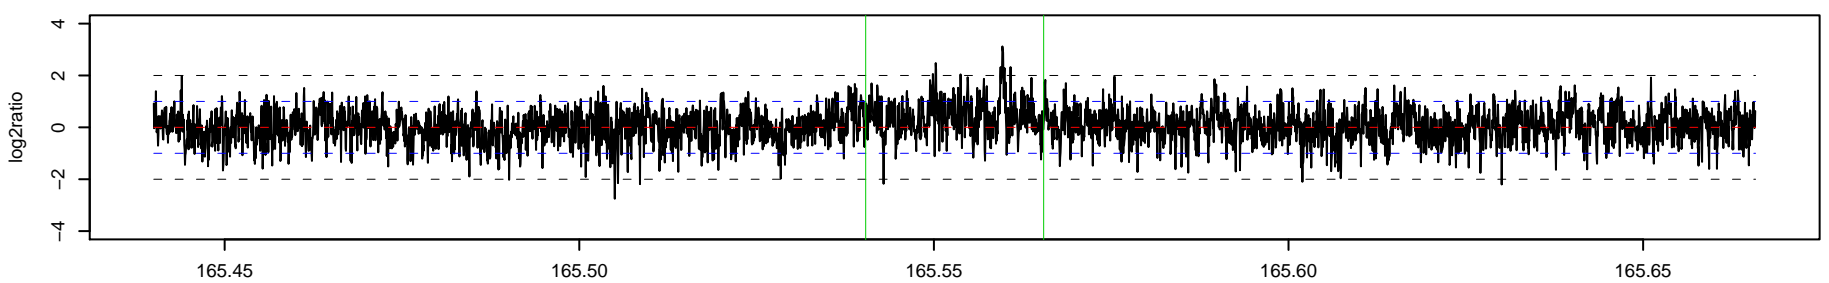

107 \_ AK1 Chr 2 : 172614474 – 172618416 , 3943 bp (aCGH relative log2ratio= 0.62 )

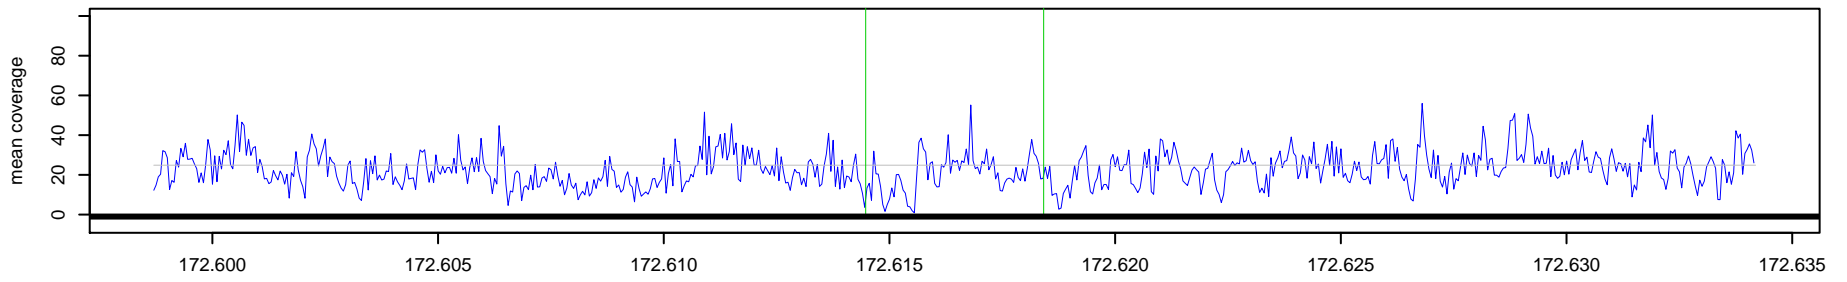

107 \_ NA10851 Chr 2 : 172614474 – 172618416 , 3943 bp (aCGH relative log2ratio= 0.62 )

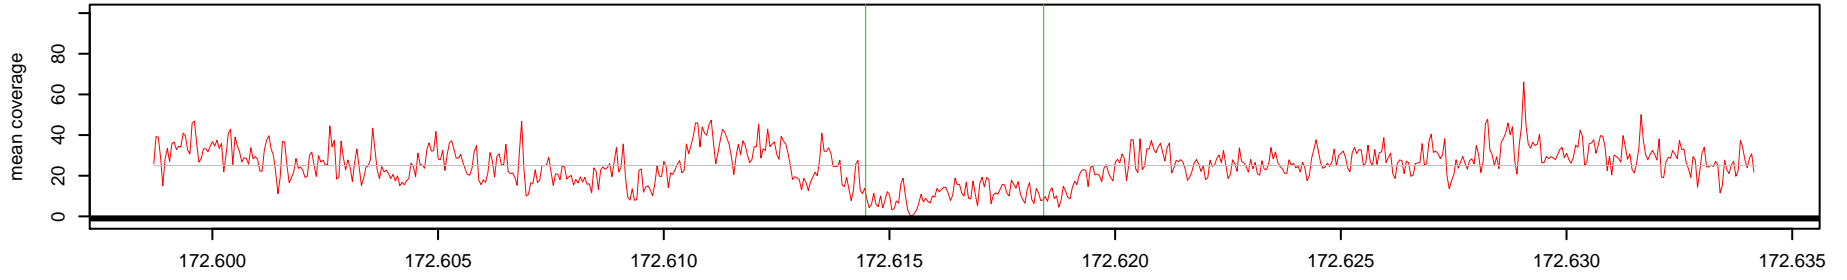

Log2( AK1 read depth / NA10851 read depth)

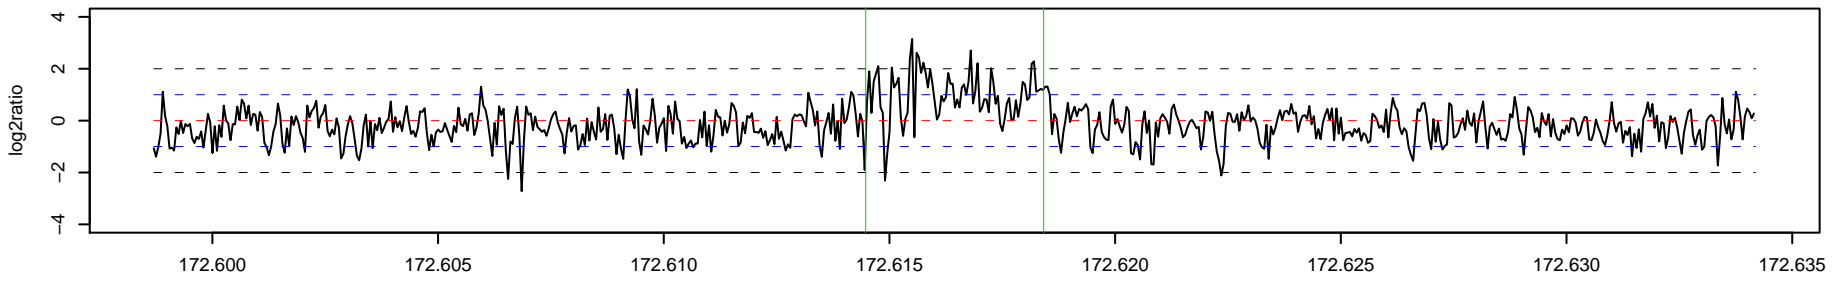

108 \_ AK1 Chr 2 : 174056072 – 174056538 , 467 bp (aCGH relative log2ratio= -0.57 )

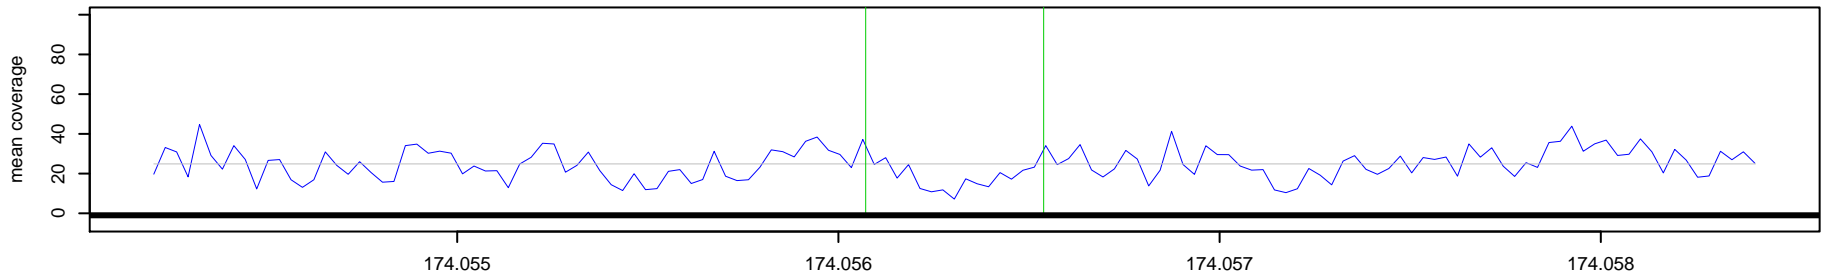

108 \_ NA10851 Chr 2 : 174056072 – 174056538 , 467 bp (aCGH relative log2ratio= -0.57 )

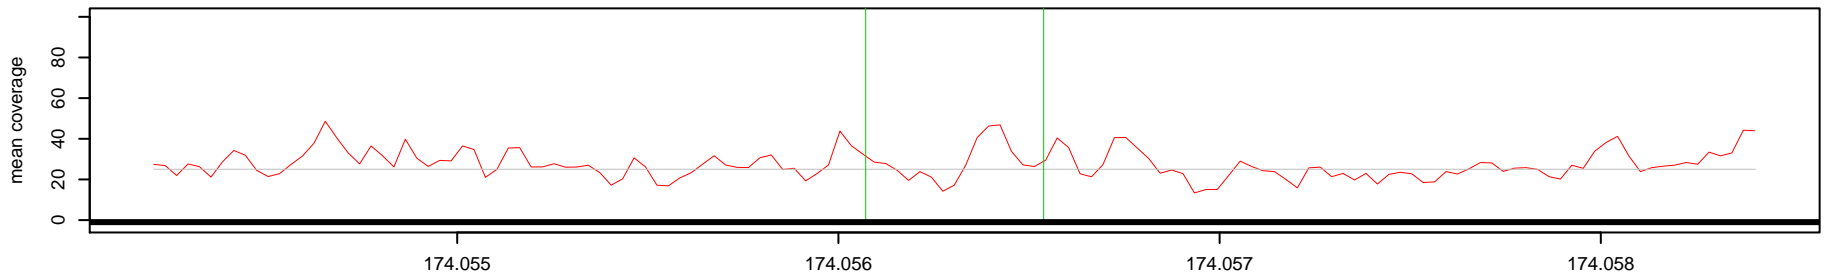

Log2( AK1 read depth / NA10851 read depth)

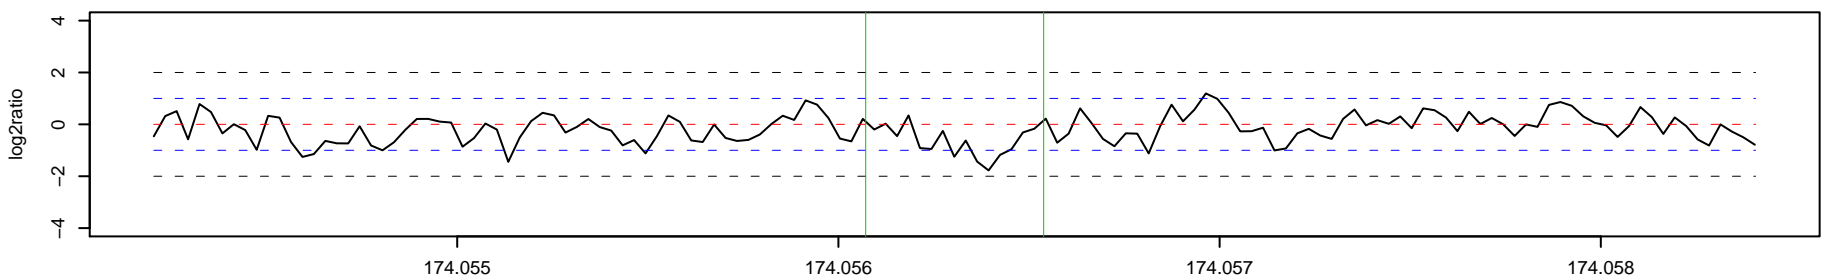

109\_AK1 Chr 2 : 176973832 – 176980335 , 6504 bp (aCGH relative log2ratio= -2.77 )

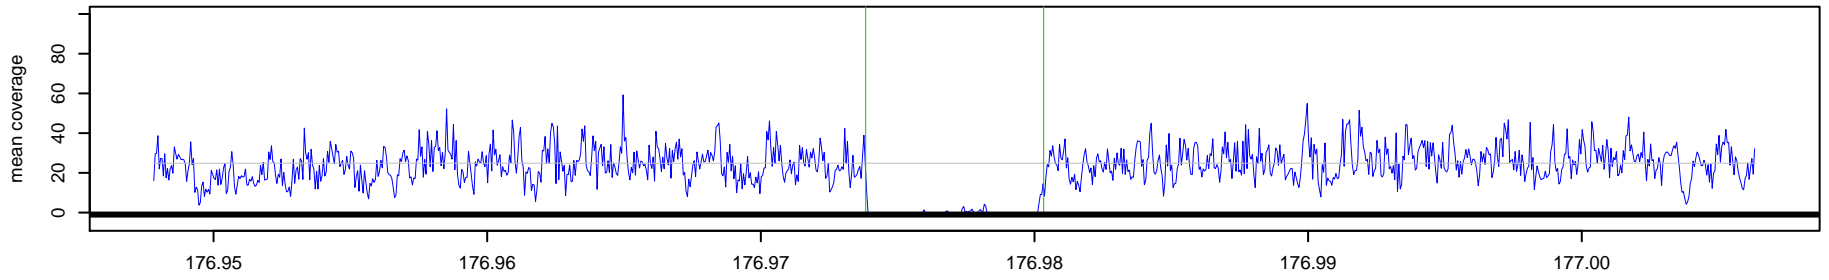

109\_NA10851 Chr 2 : 176973832 – 176980335 , 6504 bp (aCGH relative log2ratio= -2.77 )

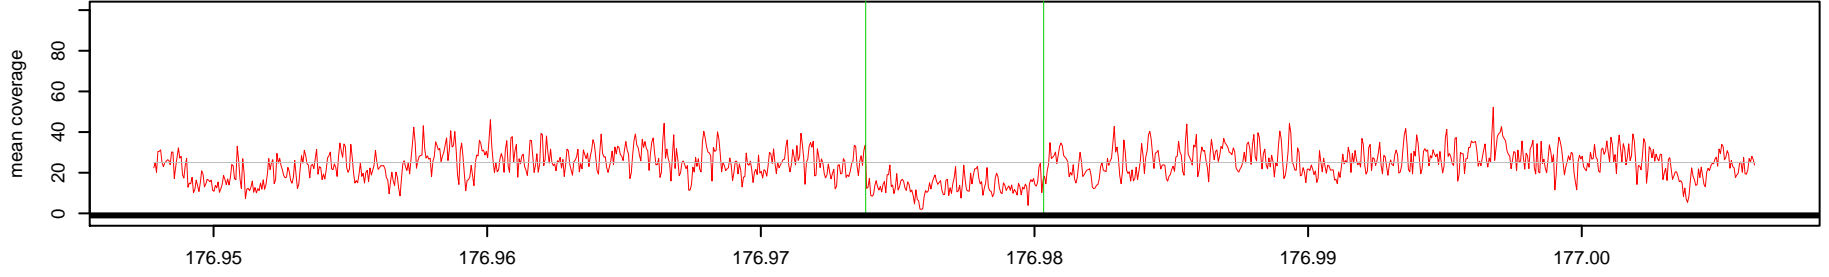

Log2( AK1 read depth / NA10851 read depth)

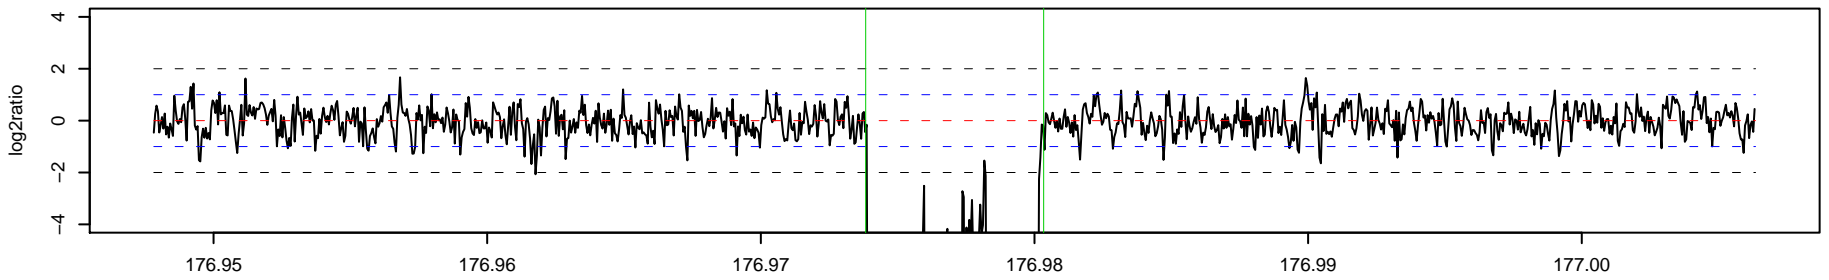

110\_AK1 Chr 2 : 179004372 – 179005208 , 837 bp (aCGH relative log2ratio= -0.87 )

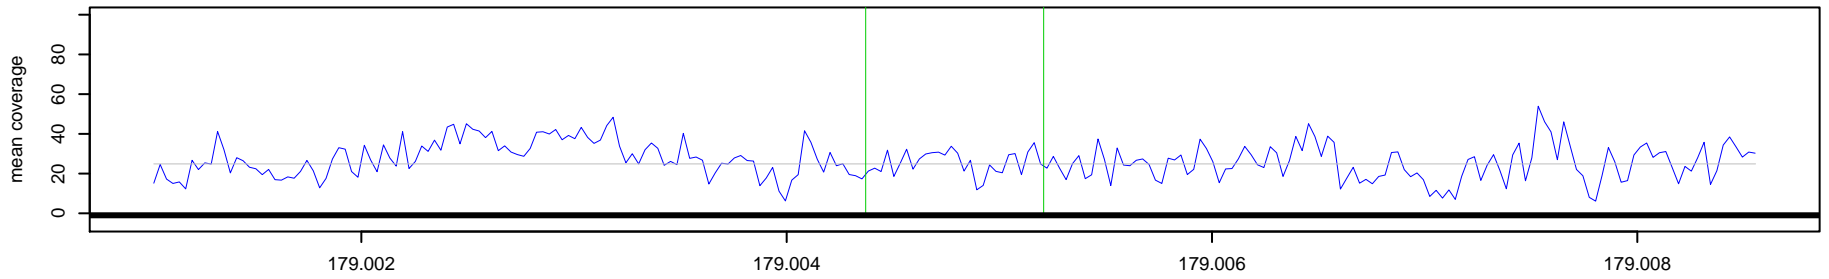

110\_NA10851 Chr 2 : 179004372 – 179005208 , 837 bp (aCGH relative log2ratio= -0.87 )

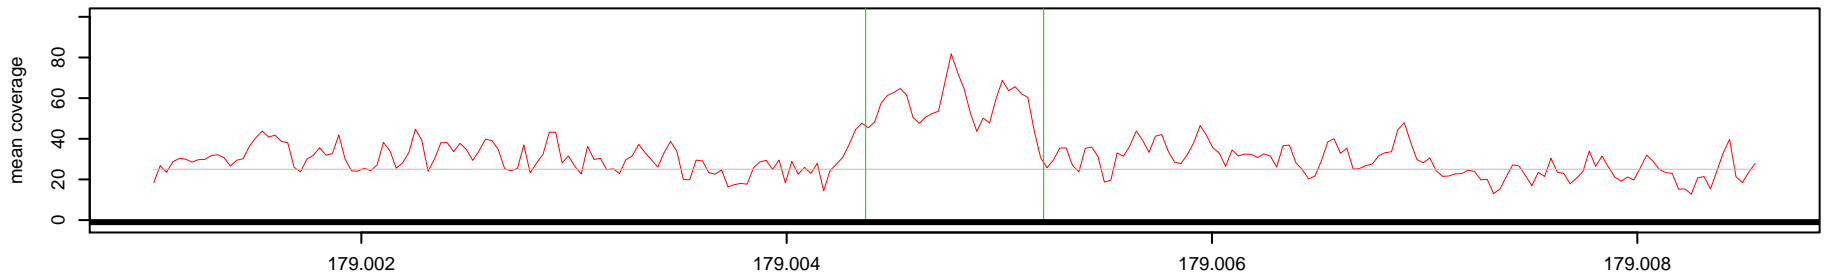

Log2( AK1 read depth / NA10851 read depth)

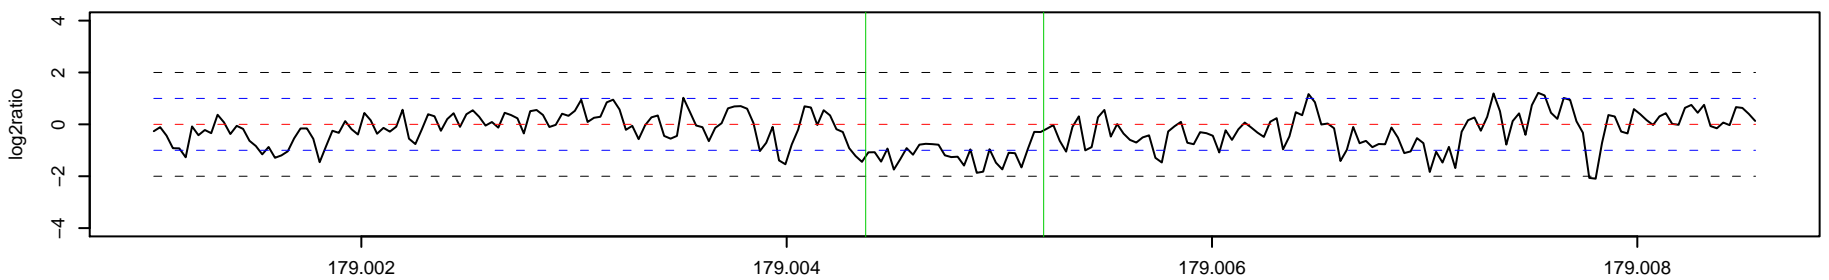

111\_AK1 Chr 2 : 179777650 – 179778976 , 1327 bp (aCGH relative log2ratio= 0.84 )

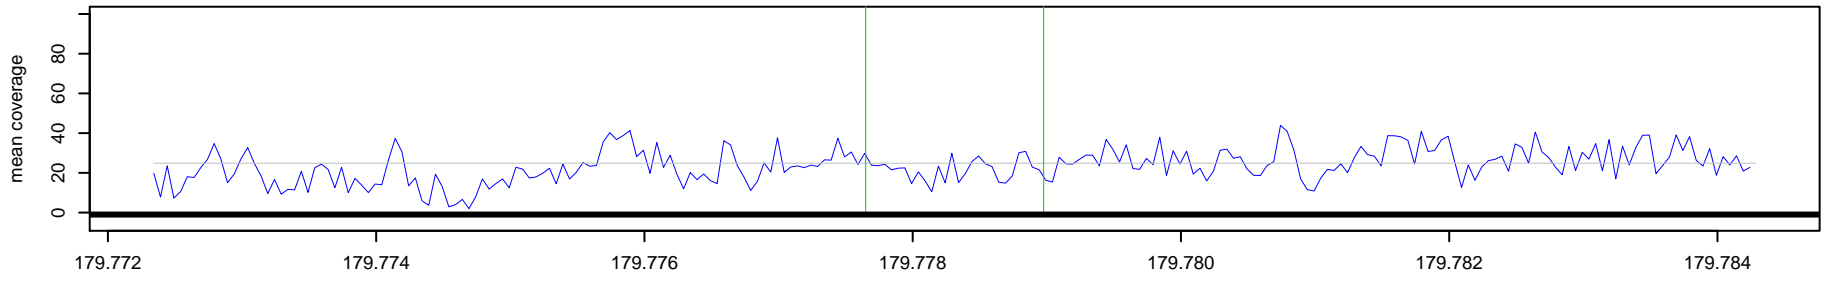

111\_NA10851 Chr 2 : 179777650 – 179778976 , 1327 bp (aCGH relative log2ratio= 0.84 )

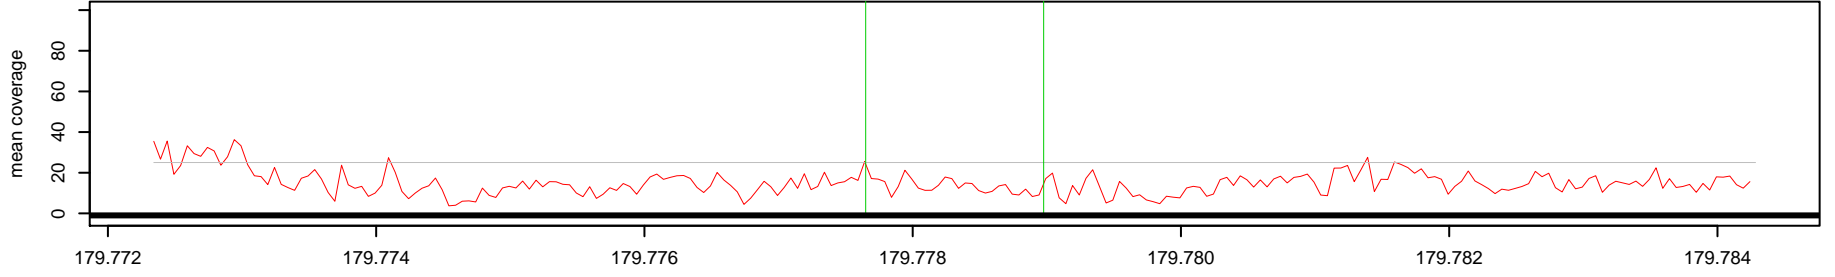

Log2( AK1 read depth / NA10851 read depth)

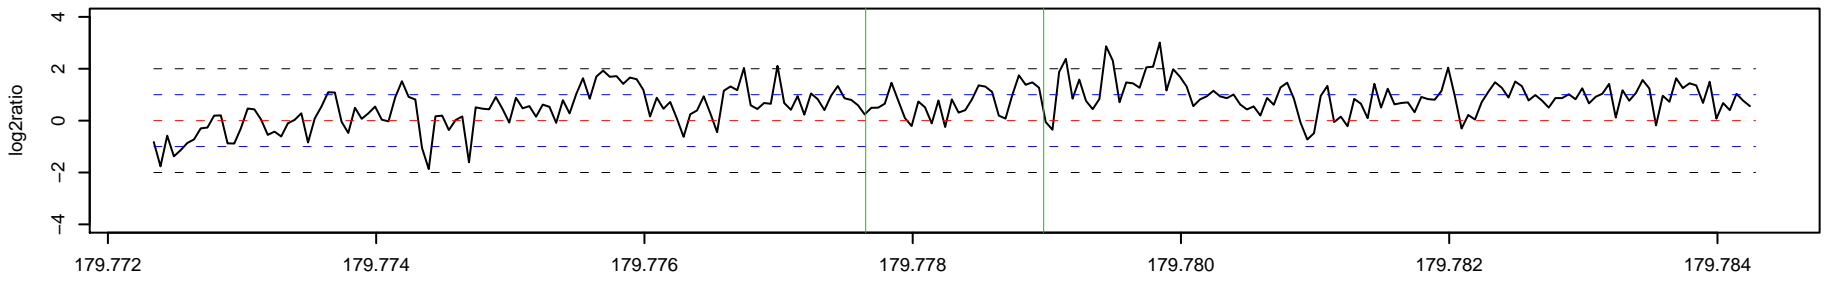

112\_AK1 Chr 2 : 182565075 – 182565816 , 742 bp (aCGH relative log2ratio= -0.97 )

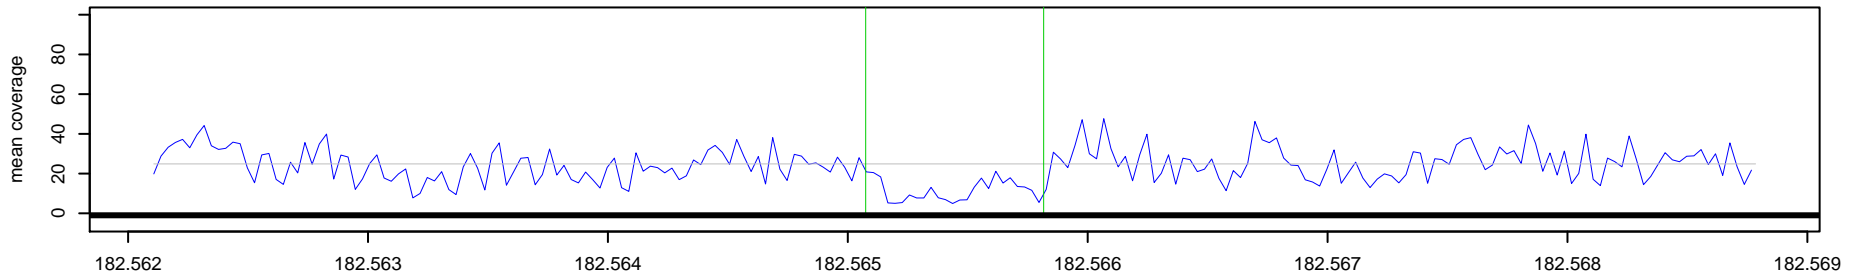

112\_NA10851 Chr 2 : 182565075 – 182565816 , 742 bp (aCGH relative log2ratio= -0.97 )

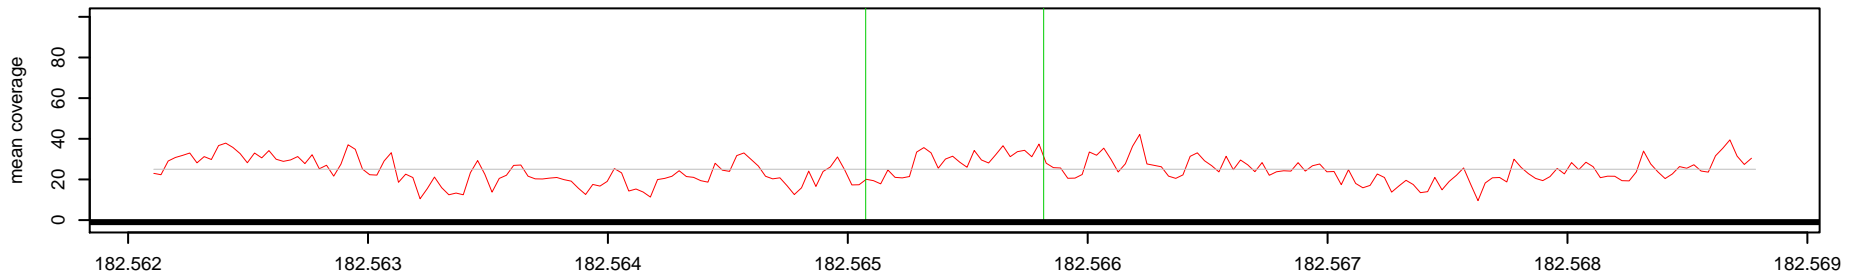

Log2( AK1 read depth / NA10851 read depth)

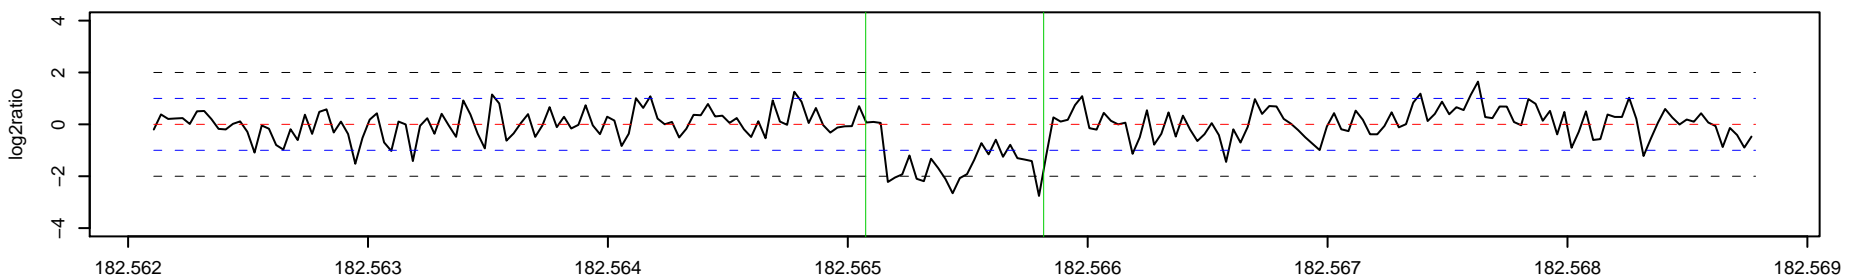

113\_AK1 Chr 2 : 193262840 – 193267330 , 4491 bp (aCGH relative log2ratio= -0.87 )

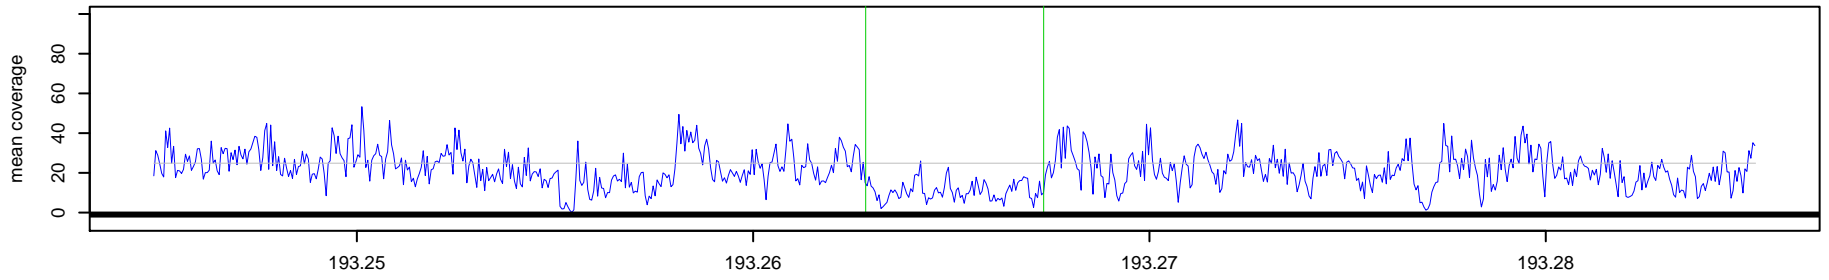

113\_NA10851 Chr 2 : 193262840 – 193267330 , 4491 bp (aCGH relative log2ratio= -0.87 )

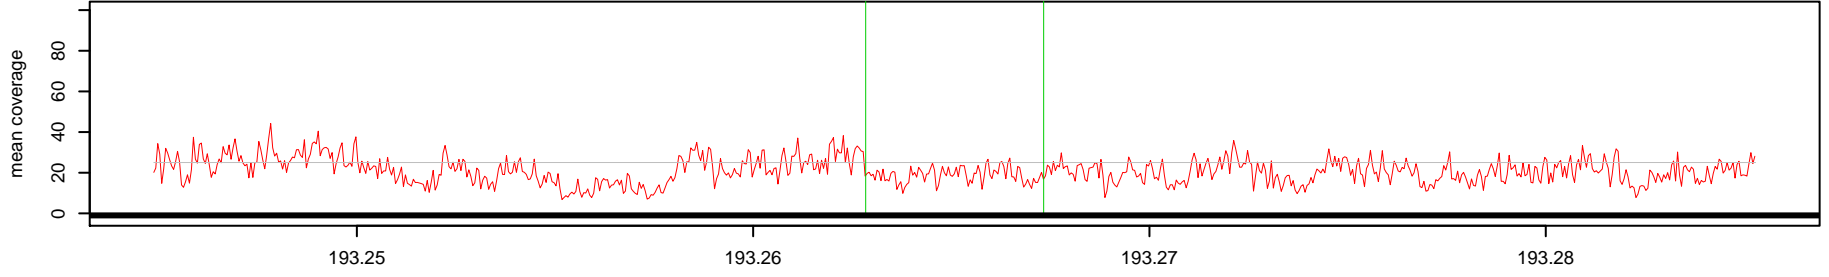

Log2( AK1 read depth / NA10851 read depth)

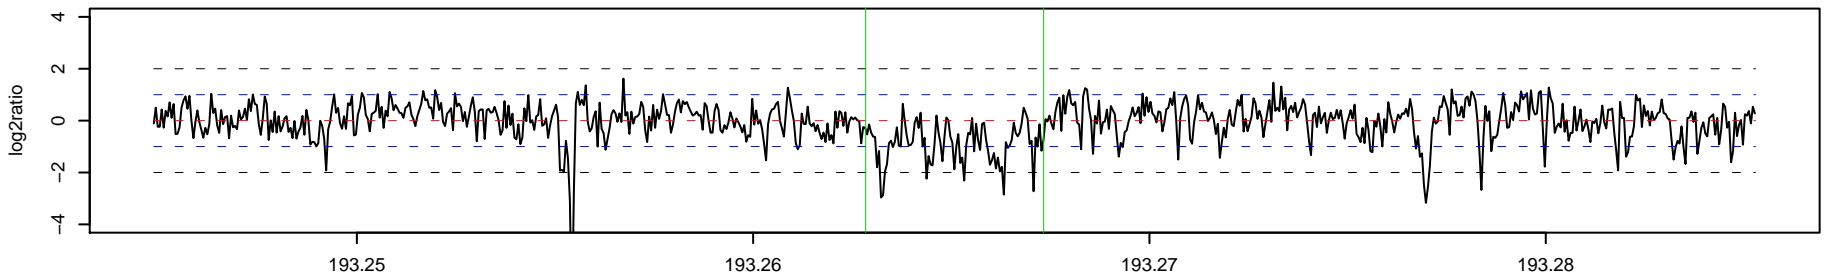

114\_AK1 Chr 2 : 195688756 – 195692321 , 3566 bp (aCGH relative log2ratio= -0.90 )

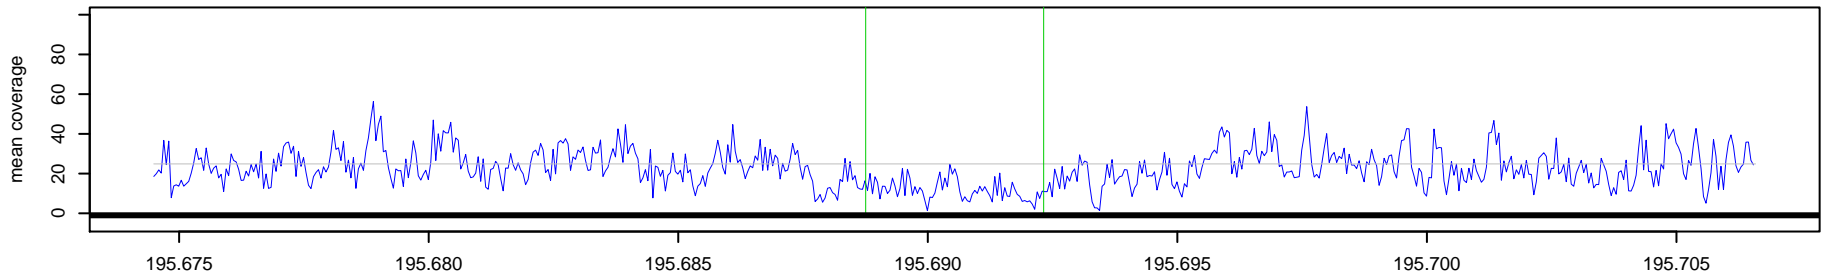

114\_NA10851 Chr 2 : 195688756 – 195692321 , 3566 bp (aCGH relative log2ratio= -0.90 )

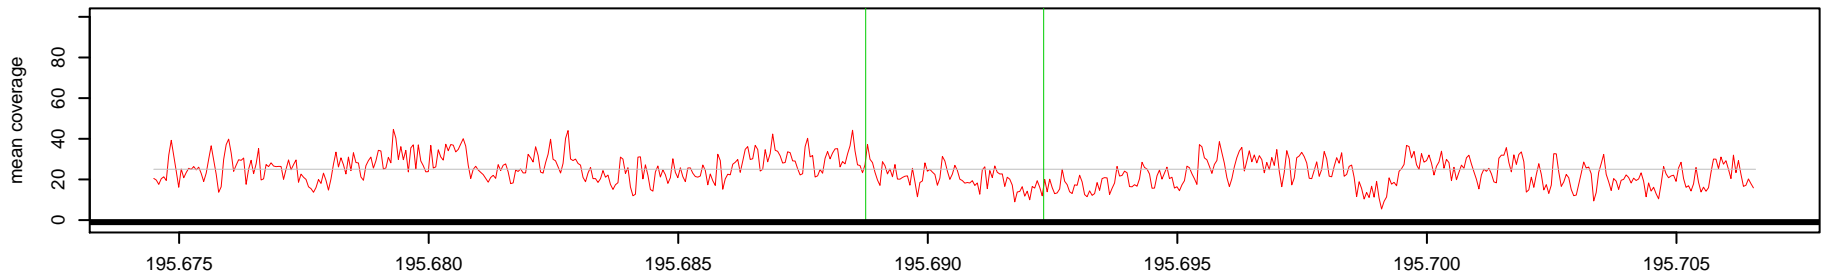

Log2( AK1 read depth / NA10851 read depth)

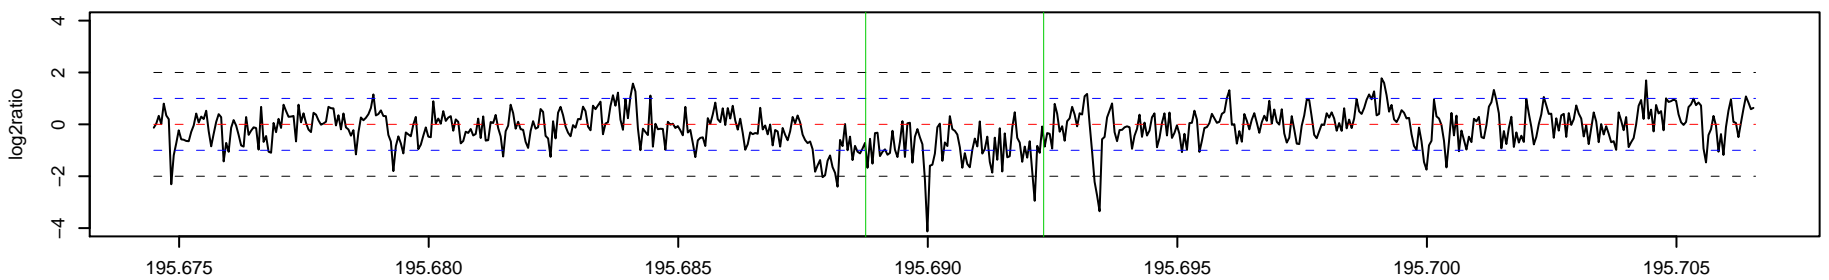

115\_AK1 Chr 2 : 203607529 – 203610510 , 2982 bp (aCGH relative log2ratio= 0.75 )

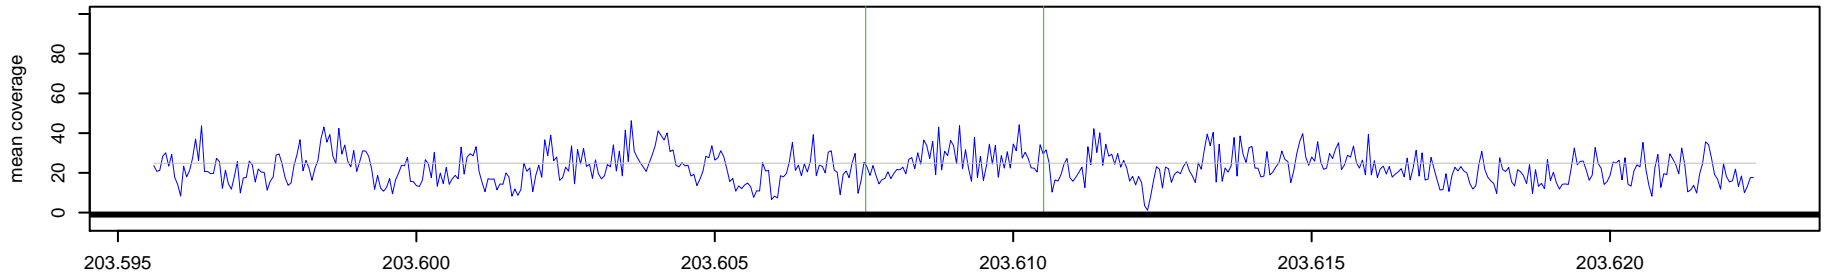

115\_NA10851 Chr 2 : 203607529 – 203610510 , 2982 bp (aCGH relative log2ratio= 0.75 )

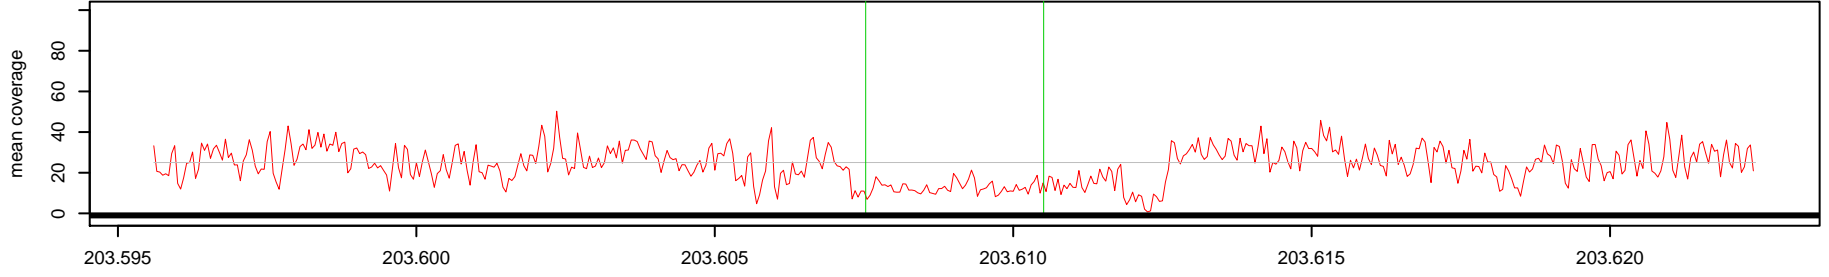

Log2( AK1 read depth / NA10851 read depth)

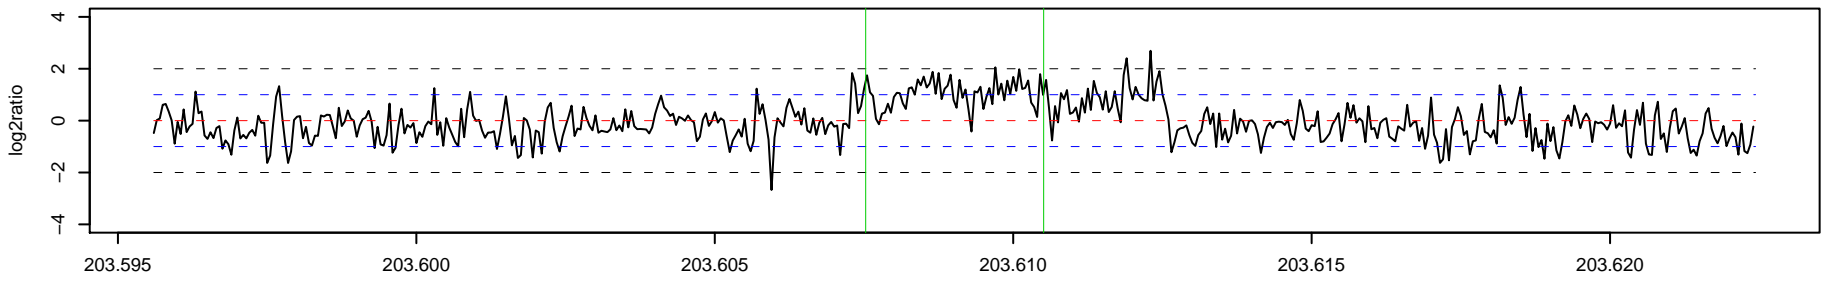

116\_AK1 Chr 2 : 205836252 – 205838105 , 1854 bp (aCGH relative log2ratio= 0.92 )

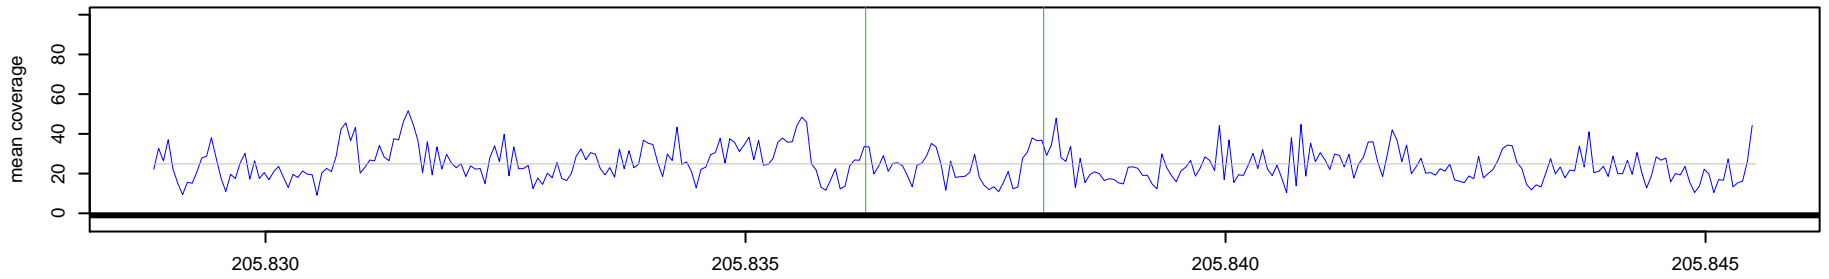

116\_NA10851 Chr 2 : 205836252 – 205838105 , 1854 bp (aCGH relative log2ratio= 0.92 )

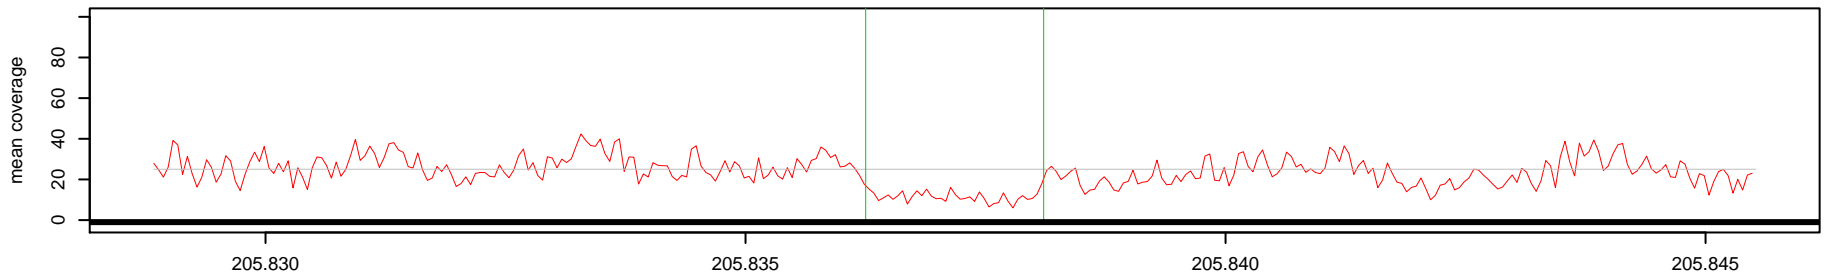

Log2( AK1 read depth / NA10851 read depth)

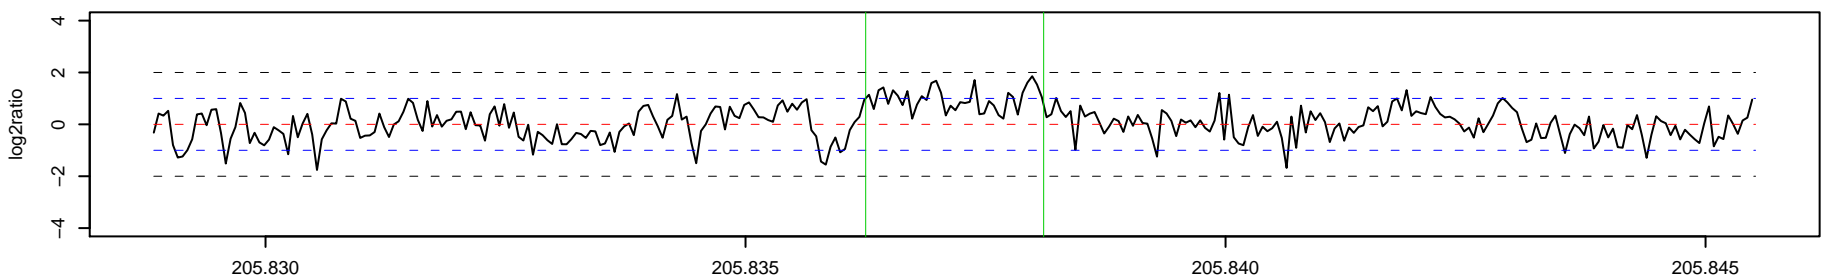

117\_AK1 Chr 2 : 206881059 – 206881978 , 920 bp (aCGH relative log2ratio= -0.30 )

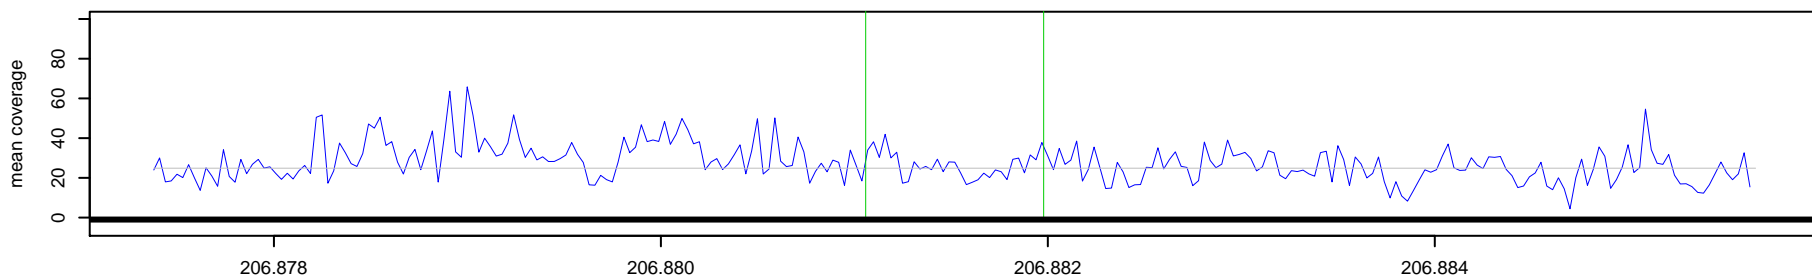

117\_NA10851 Chr 2 : 206881059 – 206881978 , 920 bp (aCGH relative log2ratio= -0.30 )

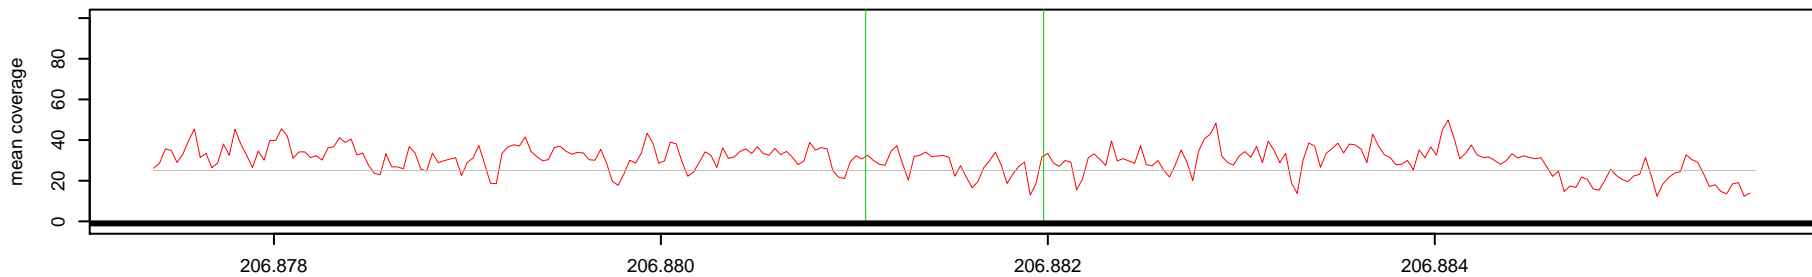

Log2( AK1 read depth / NA10851 read depth)

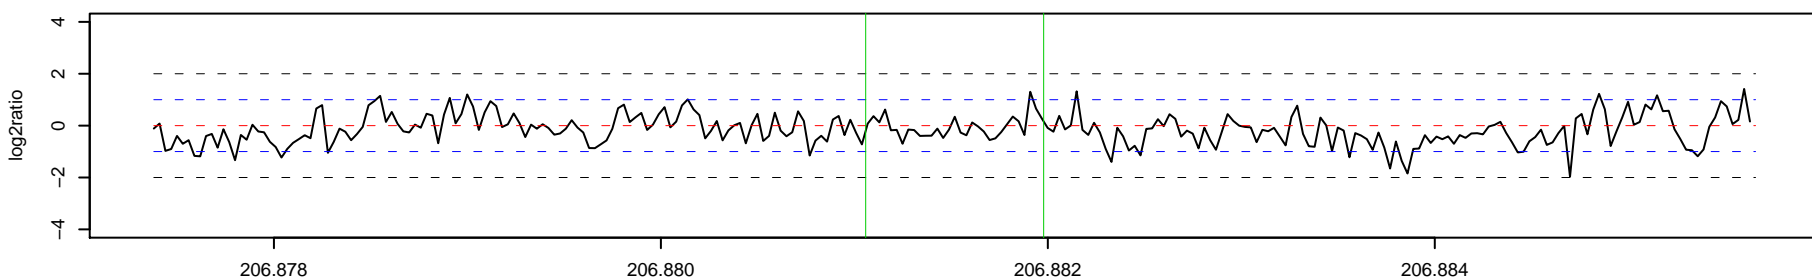

118\_AK1 Chr 2 : 208059376 – 208067611 , 8236 bp (aCGH relative log2ratio= 0.68 )

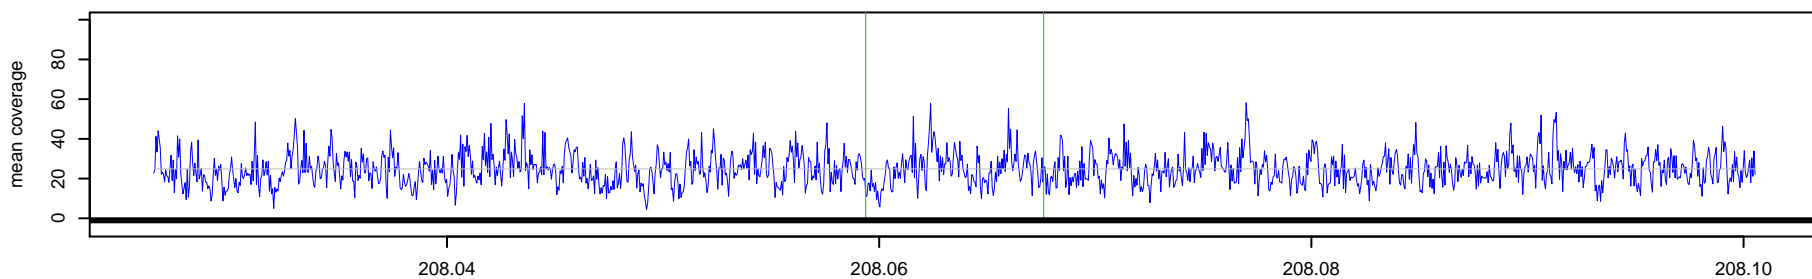

118\_NA10851 Chr 2 : 208059376 – 208067611 , 8236 bp (aCGH relative log2ratio= 0.68 )

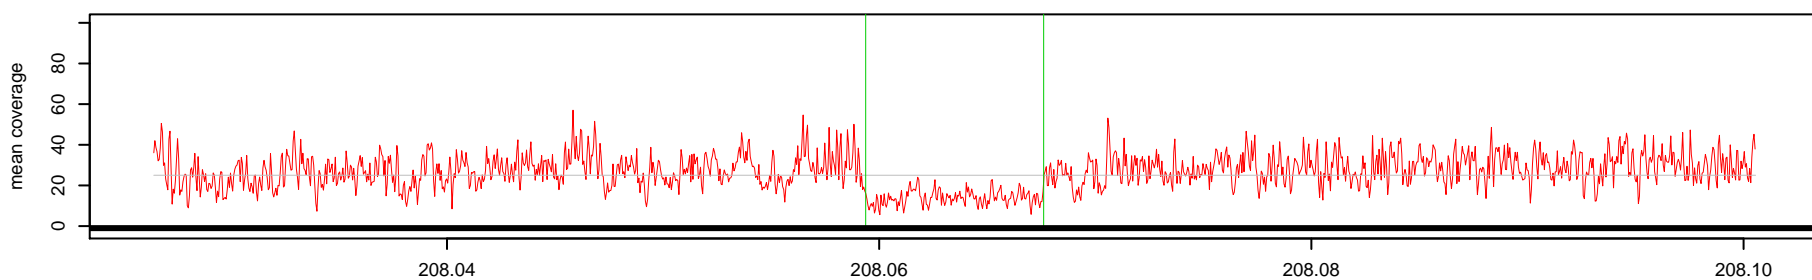

Log2( AK1 read depth / NA10851 read depth)

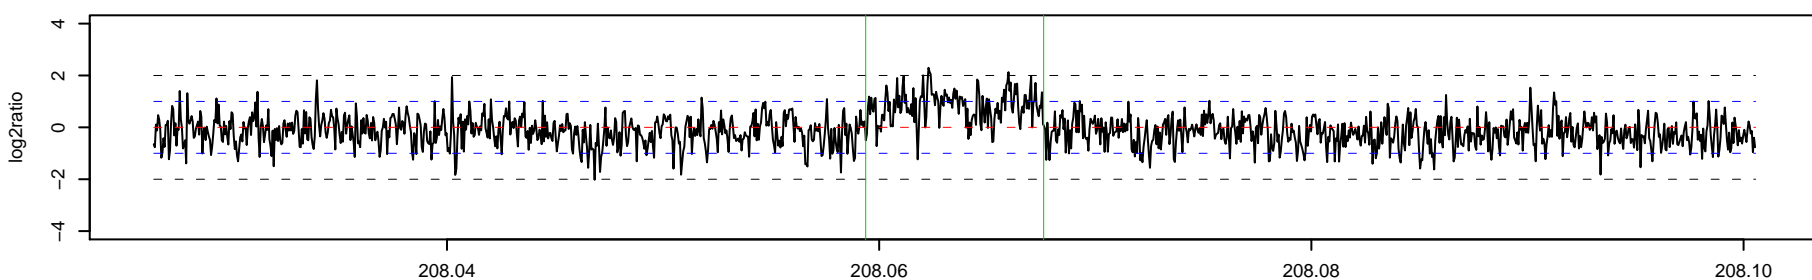

119\_AK1 Chr 2 : 215437893 – 215438736 , 844 bp (aCGH relative log2ratio= -4.27 )

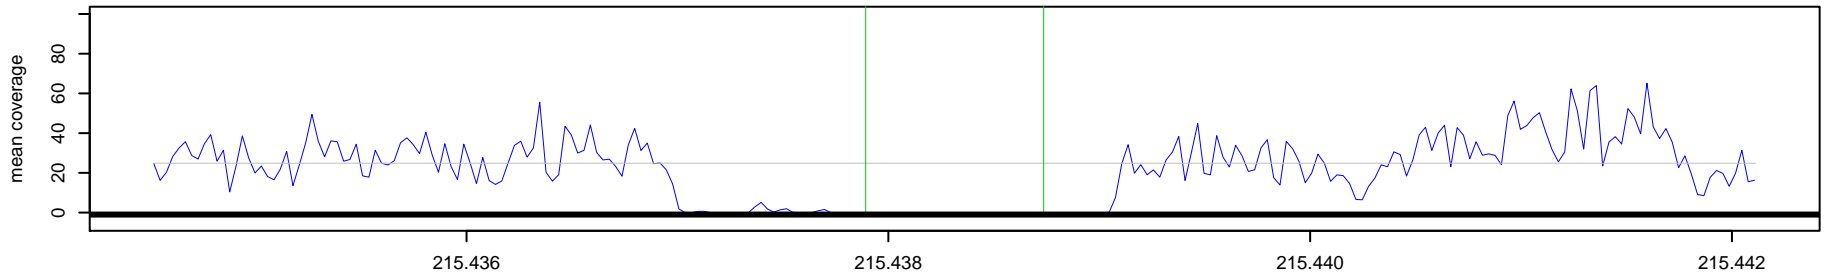

119\_NA10851 Chr 2 : 215437893 – 215438736 , 844 bp (aCGH relative log2ratio= -4.27 )

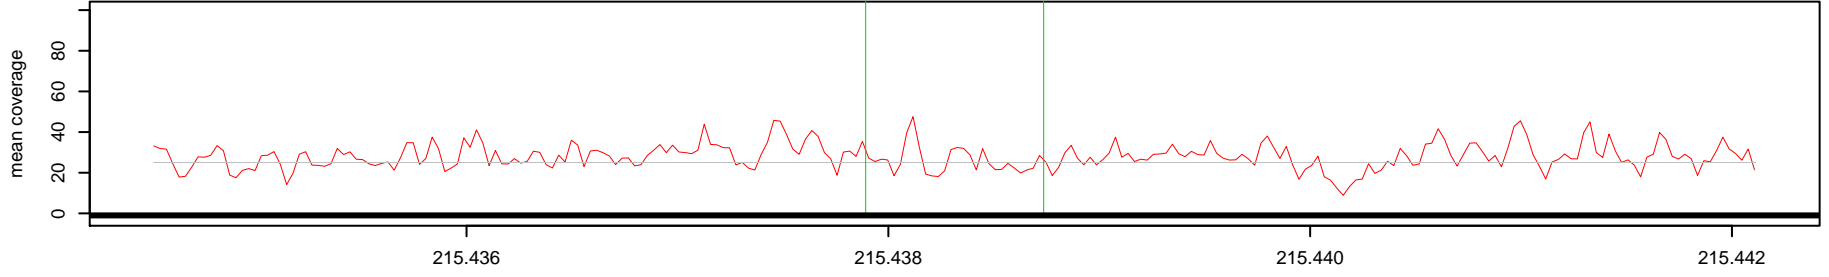

Log2( AK1 read depth / NA10851 read depth)

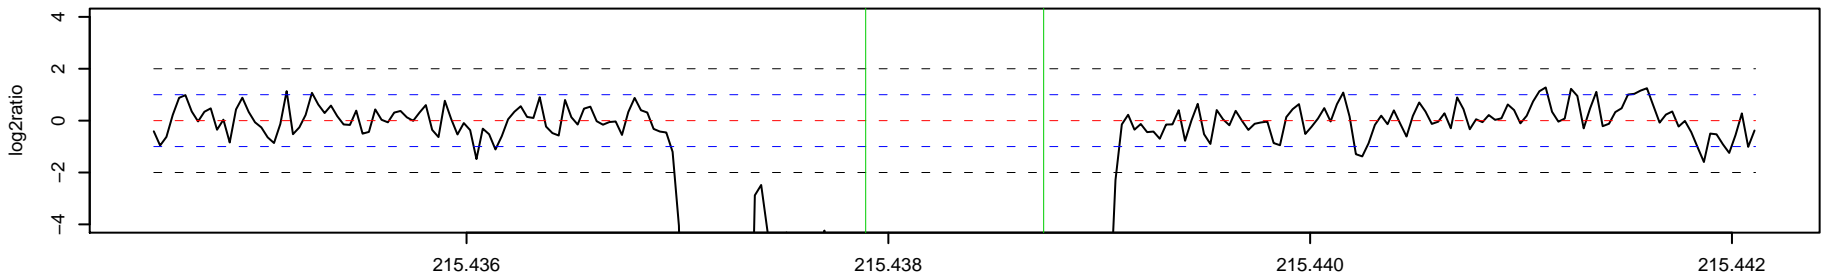

120\_AK1 Chr 2 : 226895208 – 226895741 , 534 bp (aCGH relative log2ratio= 0.52 )

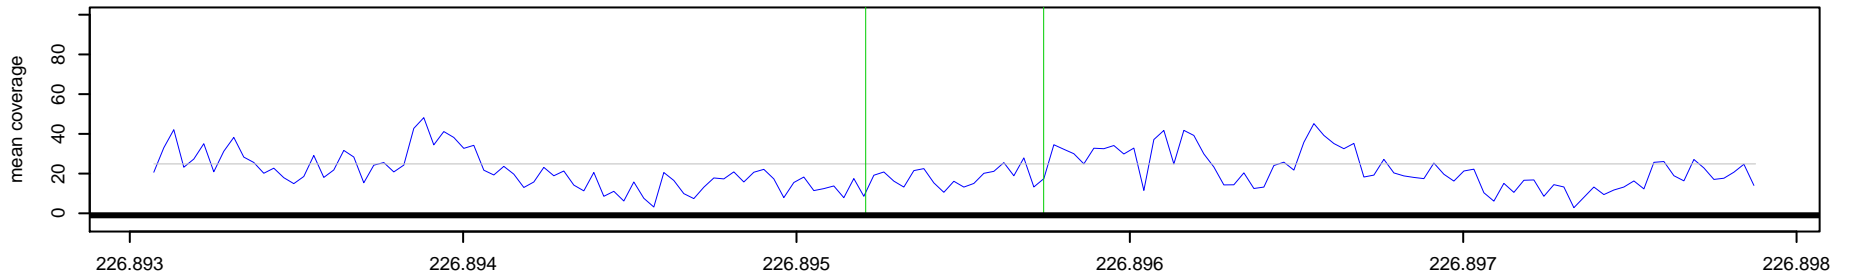

120\_NA10851 Chr 2 : 226895208 – 226895741 , 534 bp (aCGH relative log2ratio= 0.52 )

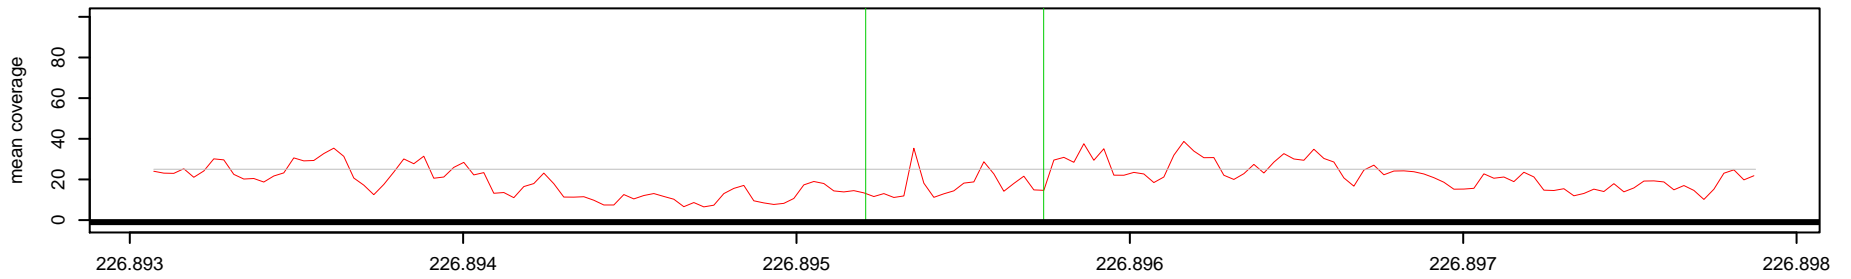

Log2( AK1 read depth / NA10851 read depth)

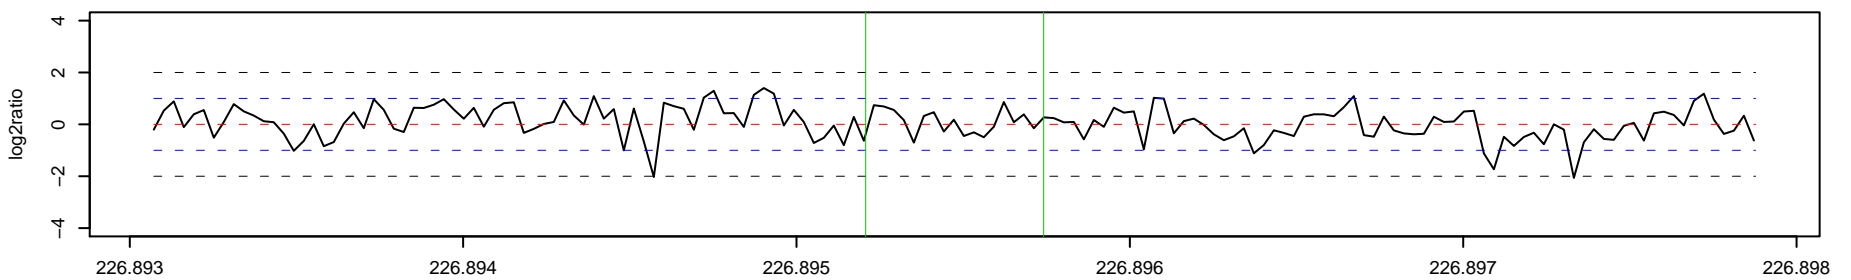



121 \_ AK1 Chr 2 : 228974913 – 228976575 , 1663 bp (aCGH relative log2ratio= 3.09 )

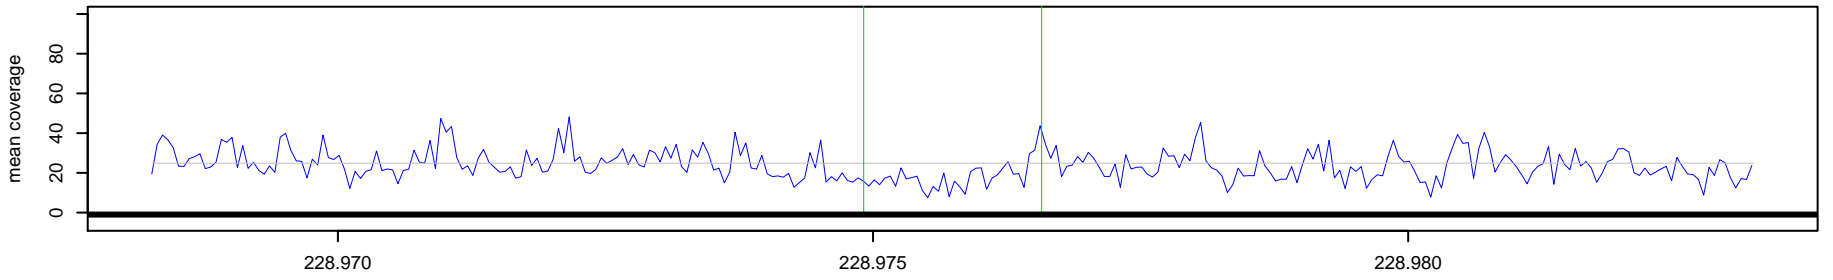

121 \_ NA10851 Chr 2 : 228974913 – 228976575 , 1663 bp (aCGH relative log2ratio= 3.09 )

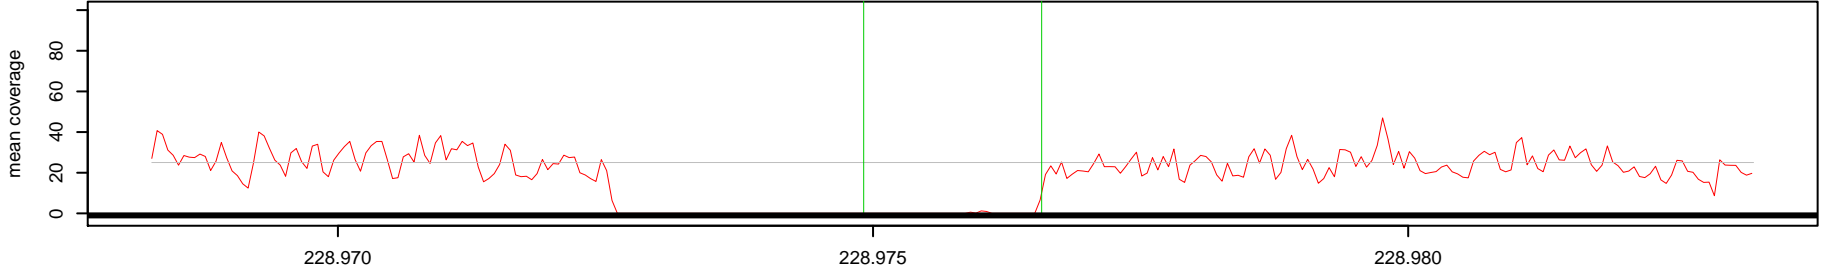

Log2( AK1 read depth / NA10851 read depth)

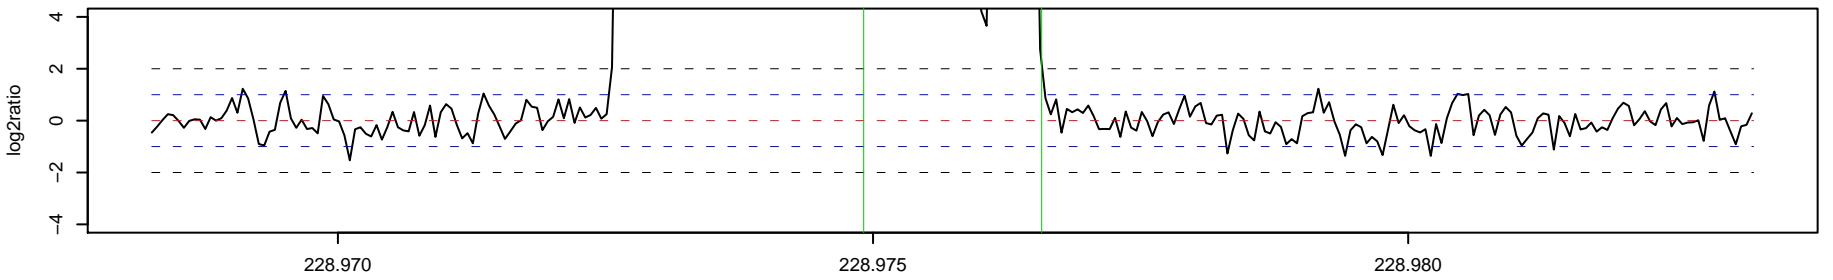

122 \_ AK1 Chr 2 : 239165738 – 239166559 , 822 bp (aCGH relative log2ratio= 2.64 )

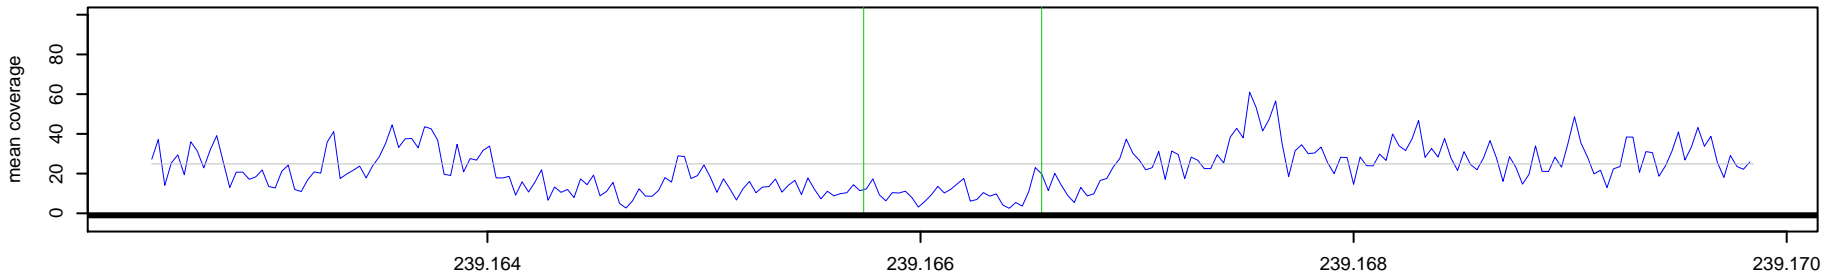

122 \_ NA10851 Chr 2 : 239165738 – 239166559 , 822 bp (aCGH relative log2ratio= 2.64 )

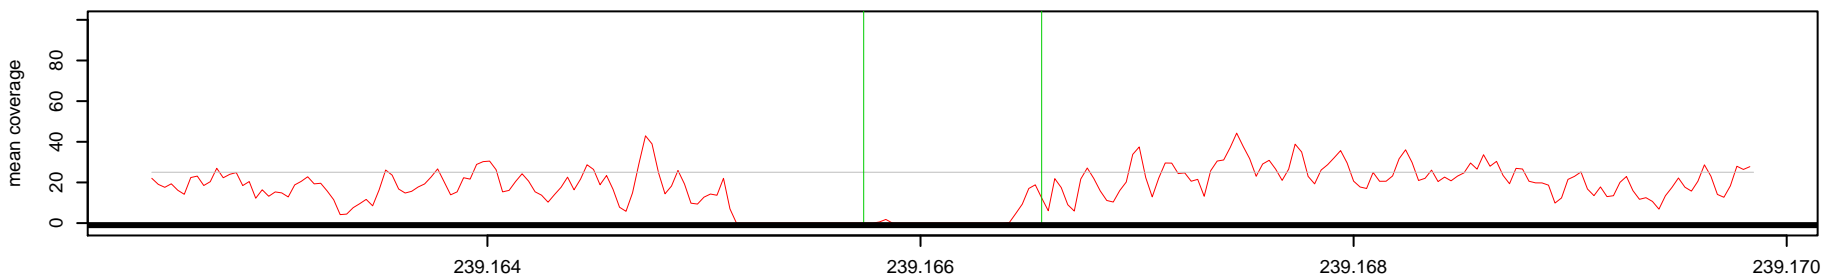

Log2( AK1 read depth / NA10851 read depth)

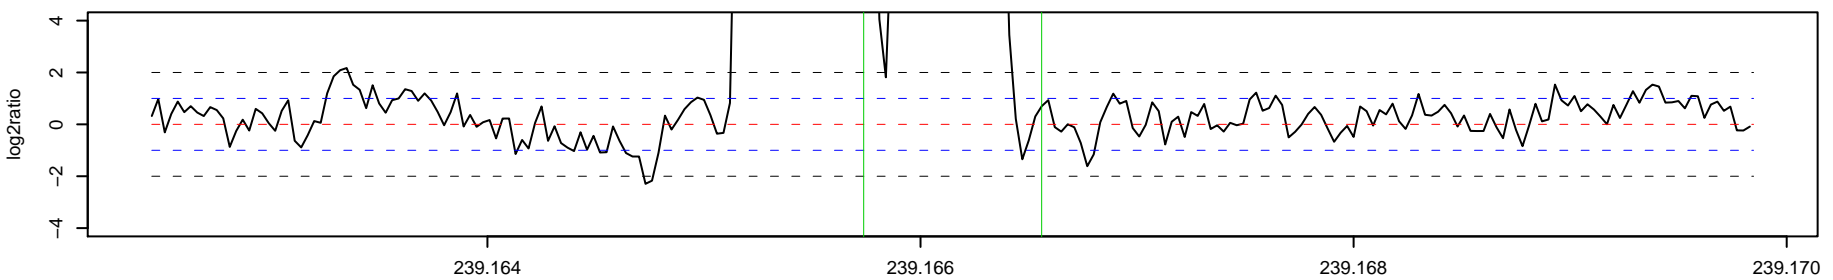

123\_AK1 Chr 3 : 205723 - 208906 , 3184 bp (aCGH relative log2ratio= -3.43 )

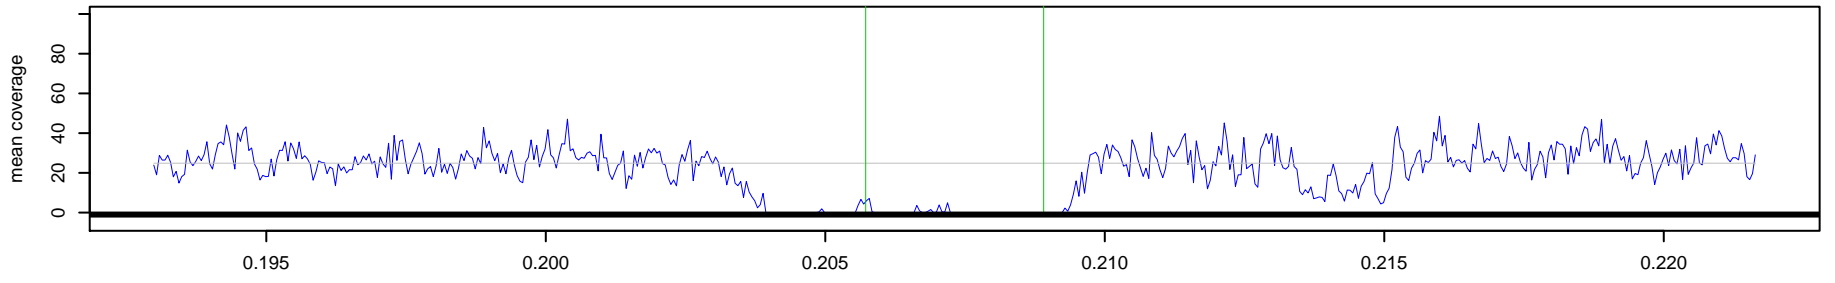

123\_NA10851 Chr 3 : 205723 - 208906 , 3184 bp (aCGH relative log2ratio= -3.43 )

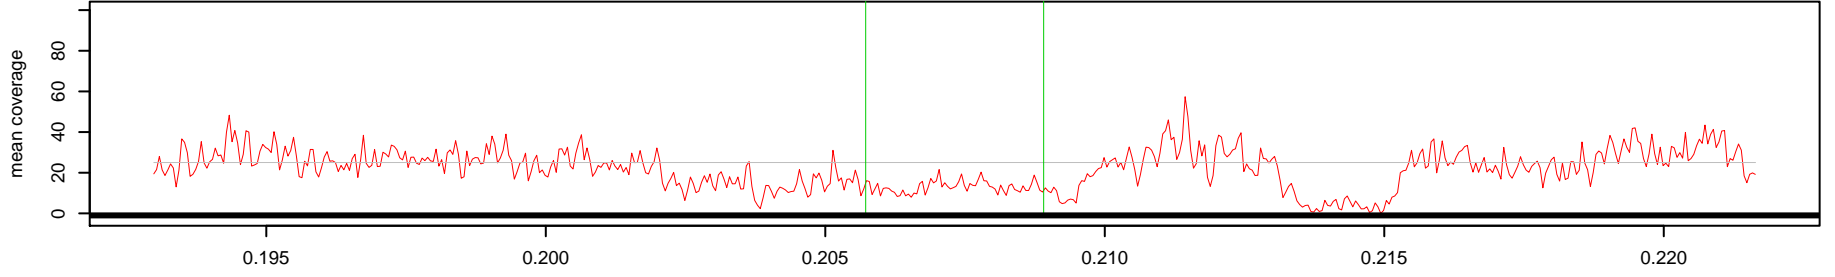

Log2( AK1 read depth / NA10851 read depth )

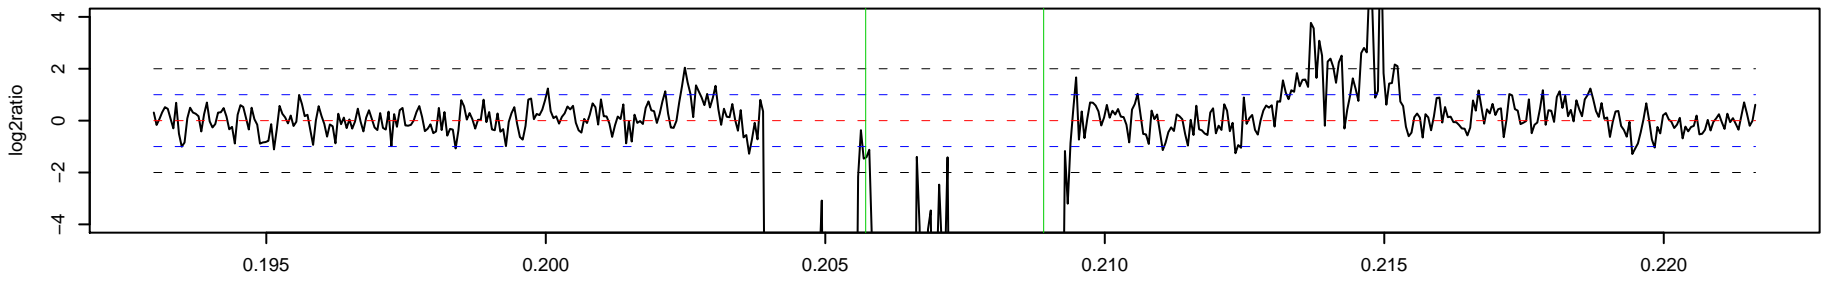

124\_AK1 Chr 3 : 1757281 - 1762382 , 5102 bp (aCGH relative log2ratio= 0.88 )

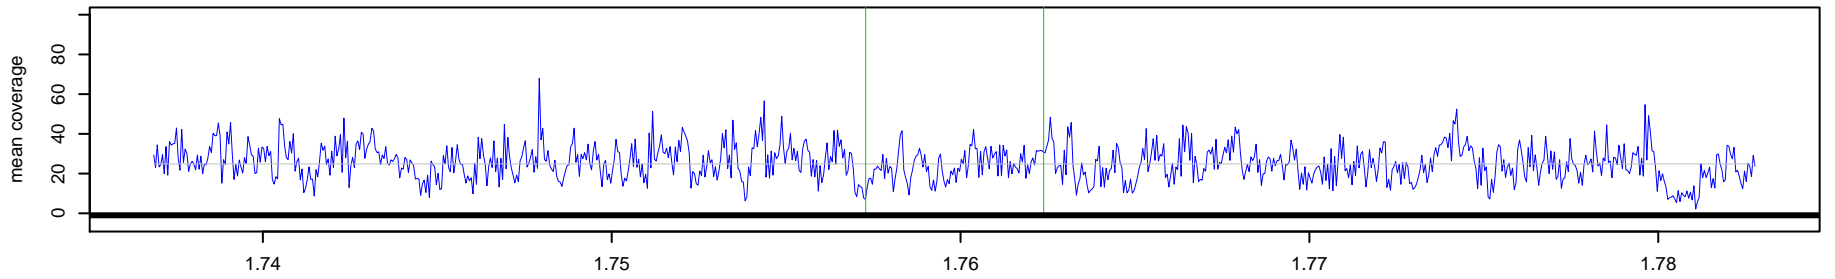

124\_NA10851 Chr 3 : 1757281 - 1762382 , 5102 bp (aCGH relative log2ratio= 0.88 )

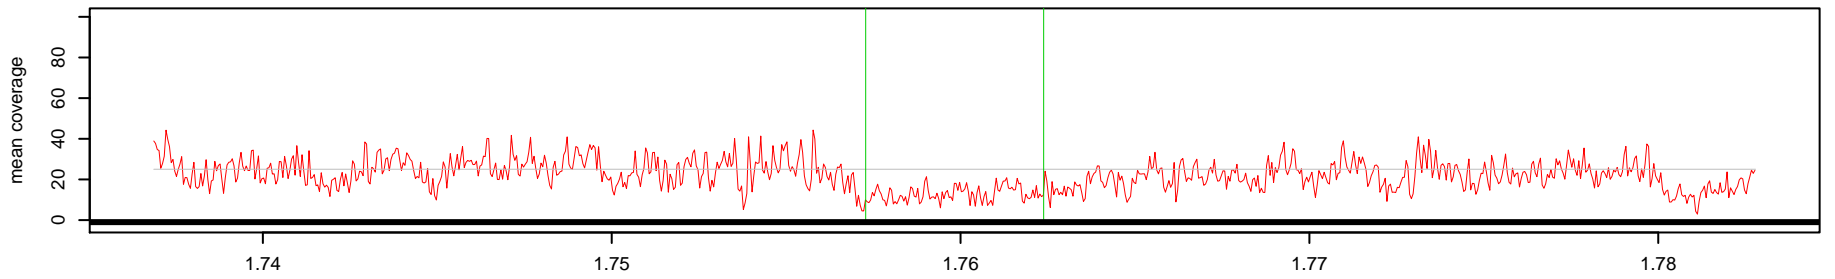

Log2( AK1 read depth / NA10851 read depth )

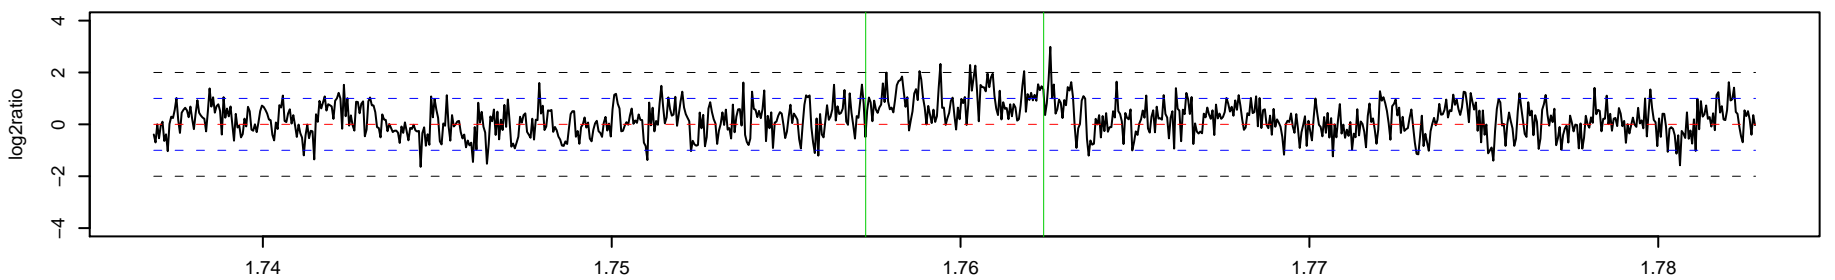

125\_AK1 Chr 3 : 8300589 – 8301775 , 1187 bp (aCGH relative log2ratio= -0.92)

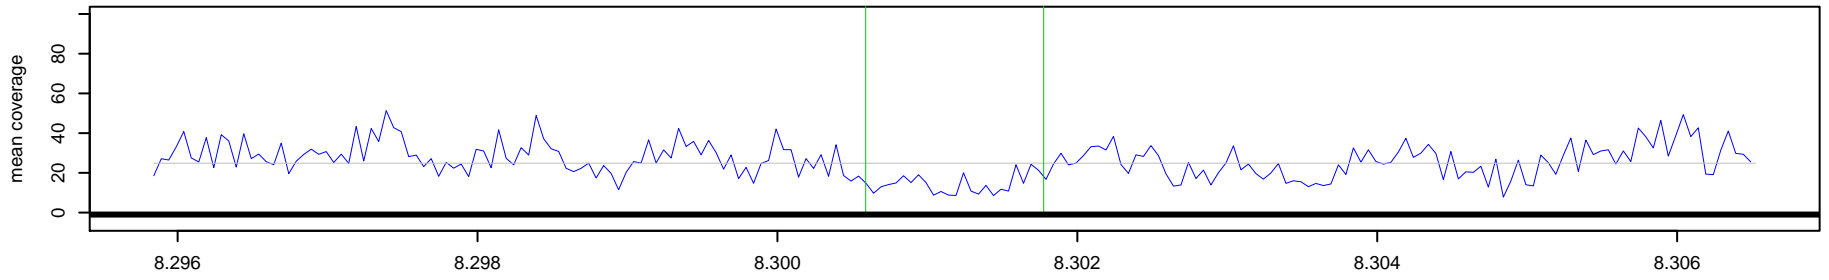

125\_NA10851 Chr 3 : 8300589 – 8301775 , 1187 bp (aCGH relative log2ratio= -0.92)

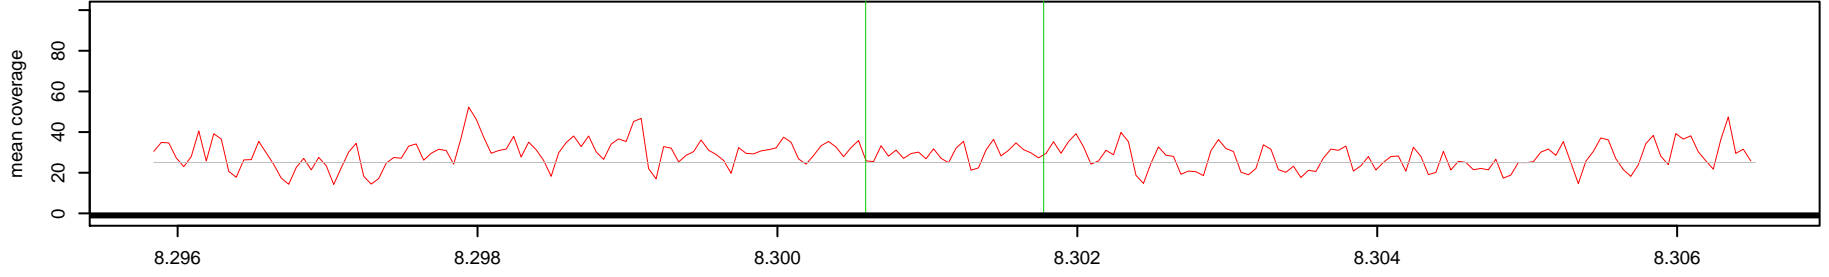

Log2( AK1 read depth / NA10851 read depth)

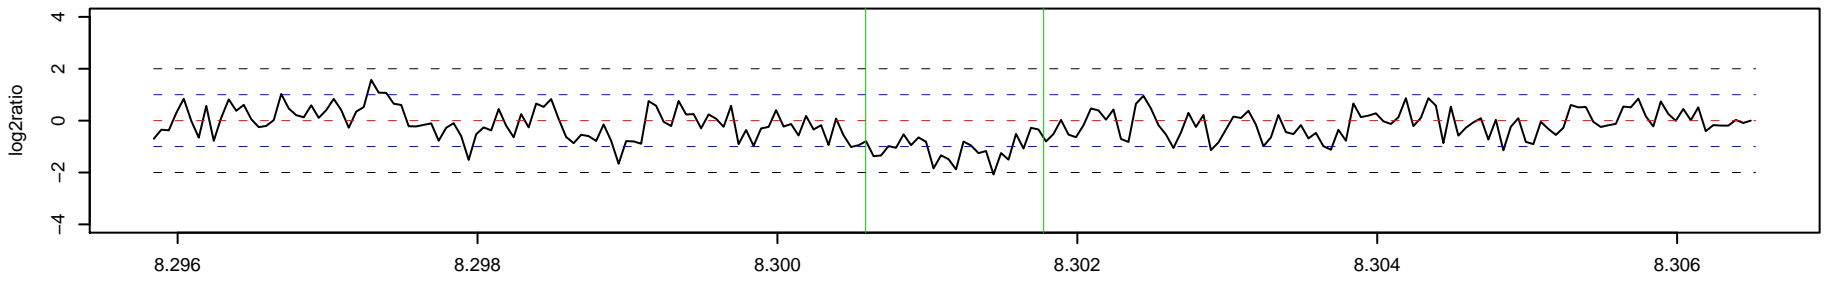

126\_AK1 Chr 3 : 14153341 – 14153943 , 603 bp (aCGH relative log2ratio= -0.90)

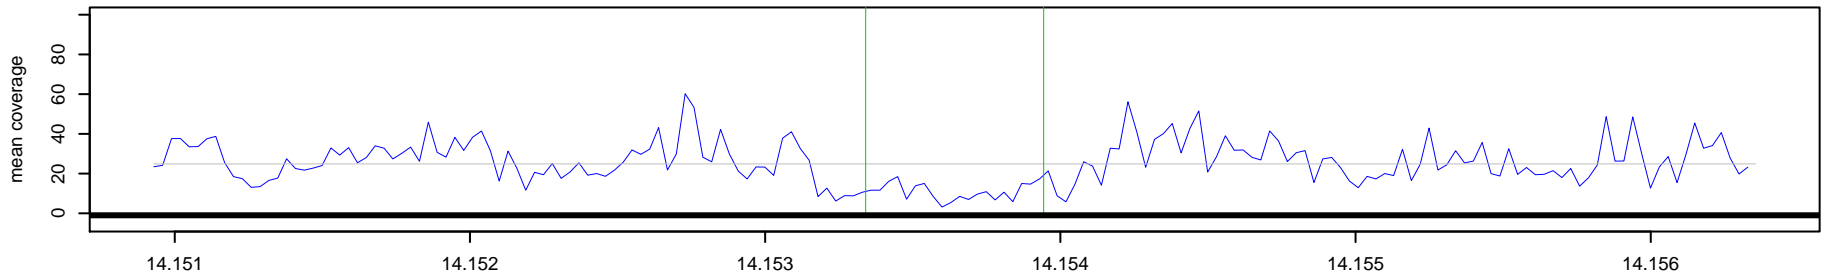

126\_NA10851 Chr 3 : 14153341 – 14153943 , 603 bp (aCGH relative log2ratio= -0.90)

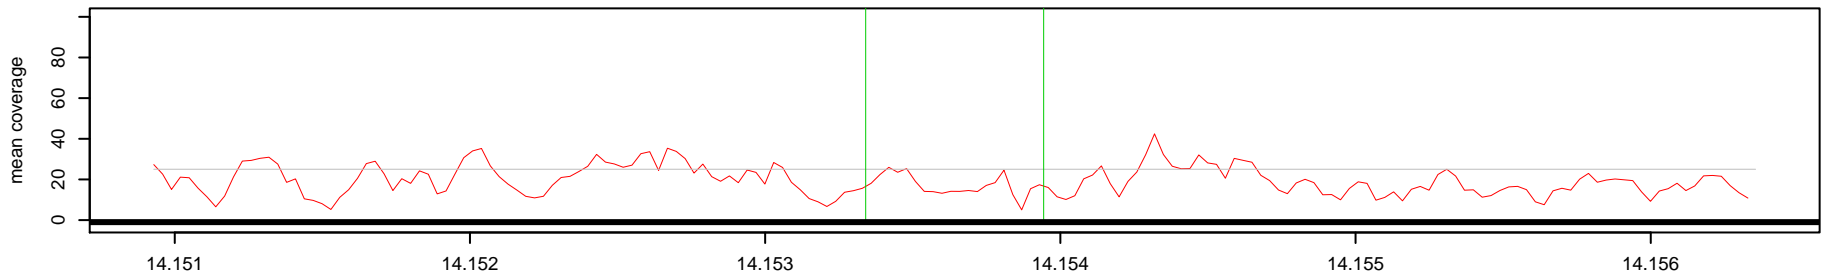

Log2( AK1 read depth / NA10851 read depth)

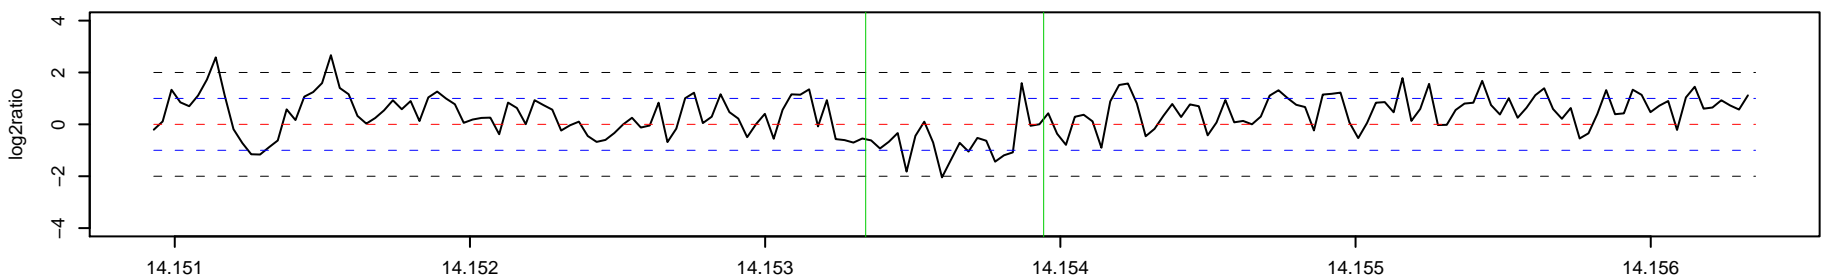

127 \_ AK1 Chr 3 : 15820053 – 15821689 , 1637 bp (aCGH relative log2ratio= 2.78 )

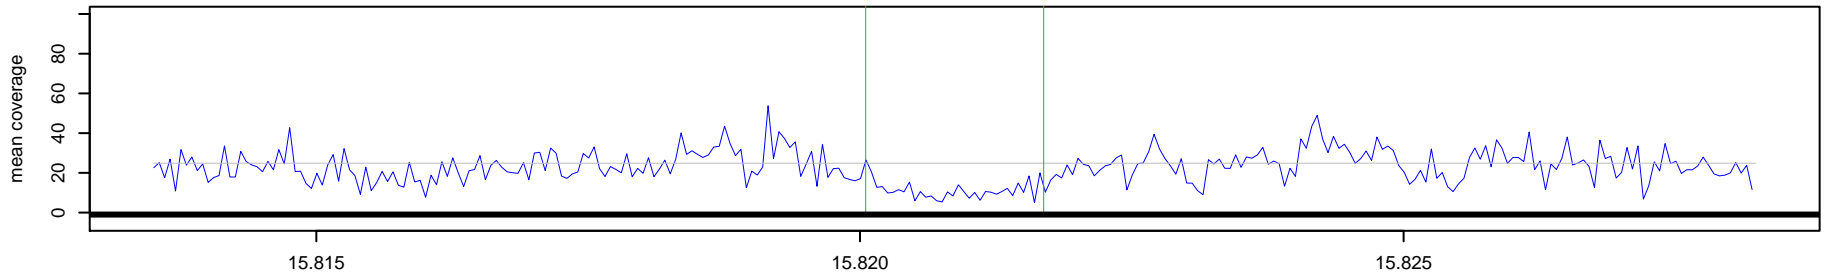

127 \_ NA10851 Chr 3 : 15820053 – 15821689 , 1637 bp (aCGH relative log2ratio= 2.78 )

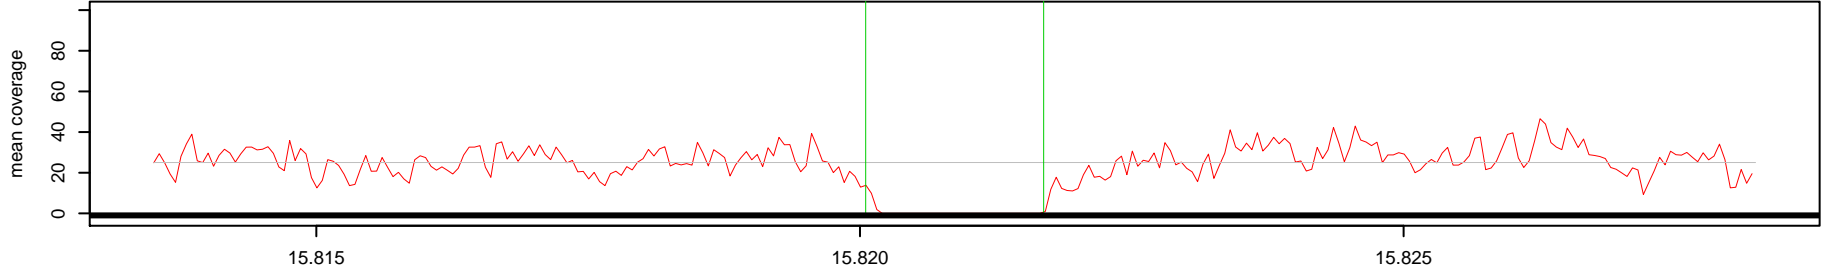

Log2( AK1 read depth / NA10851 read depth)

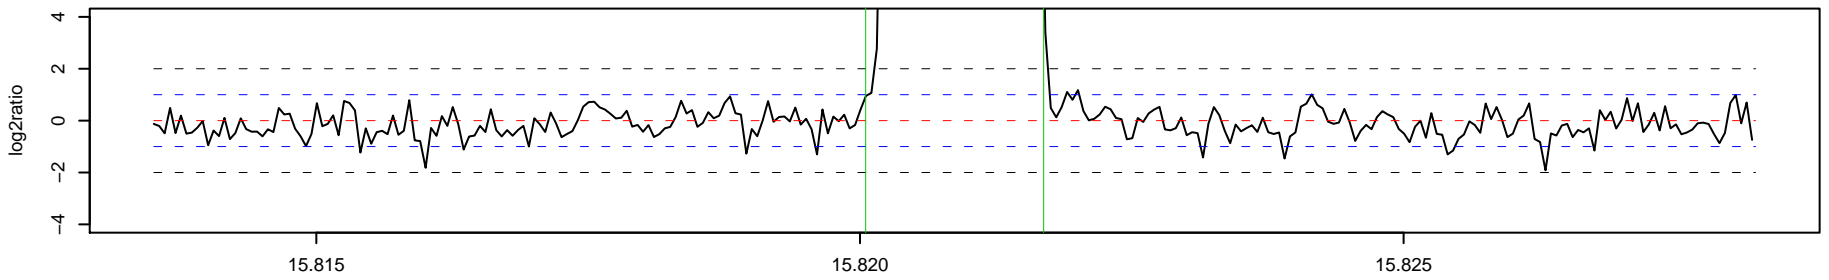

128 \_ AK1 Chr 3 : 26408161 – 26414653 , 6493 bp (aCGH relative log2ratio= 0.98 )

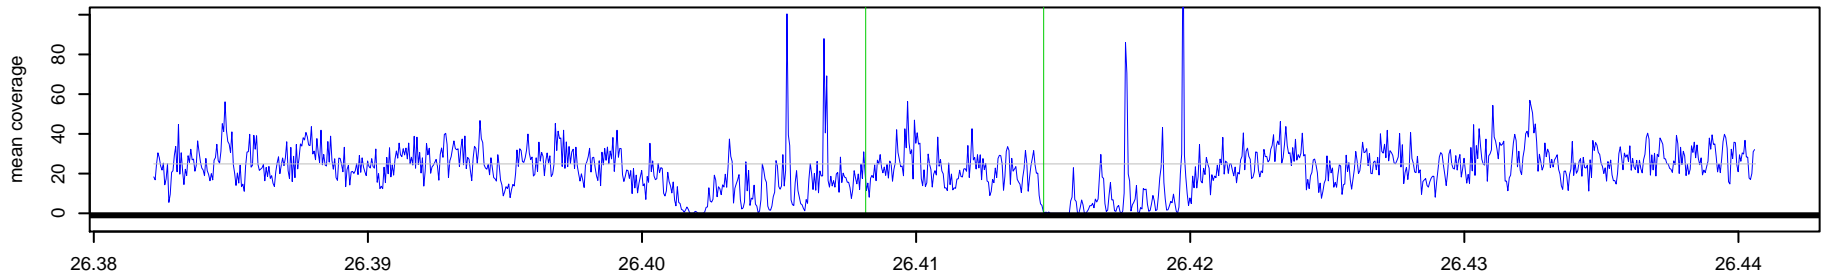

128 \_ NA10851 Chr 3 : 26408161 – 26414653 , 6493 bp (aCGH relative log2ratio= 0.98 )

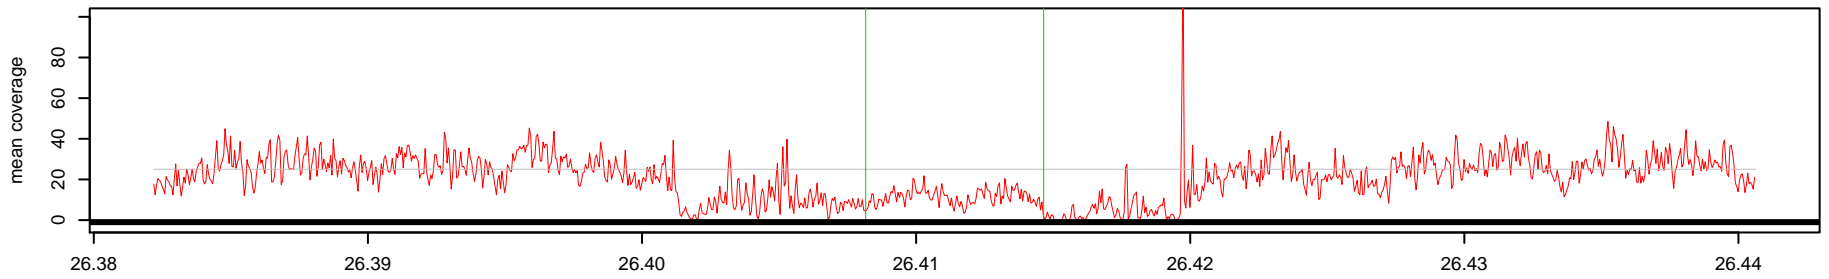

Log2( AK1 read depth / NA10851 read depth)

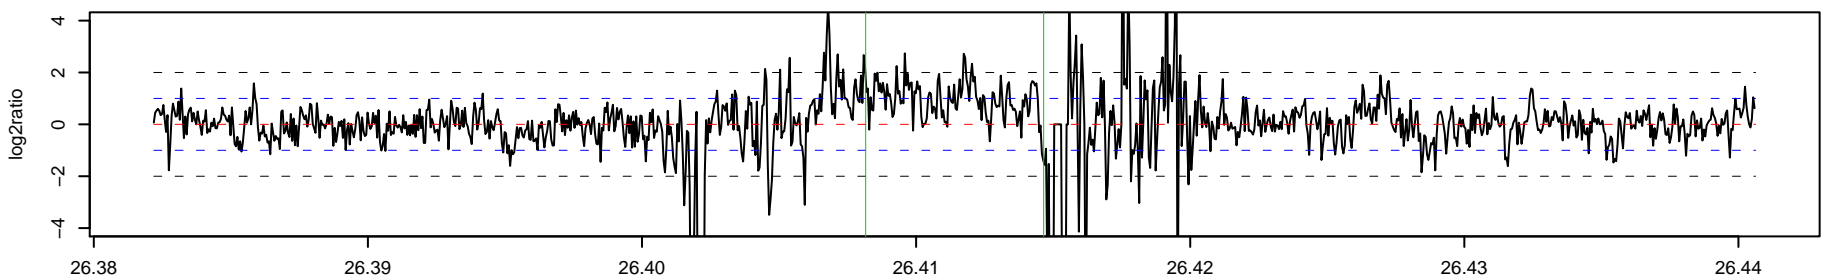

129\_AK1 Chr 3 : 26425943 – 26427239 , 1297 bp (aCGH relative log2ratio= 0.83 )

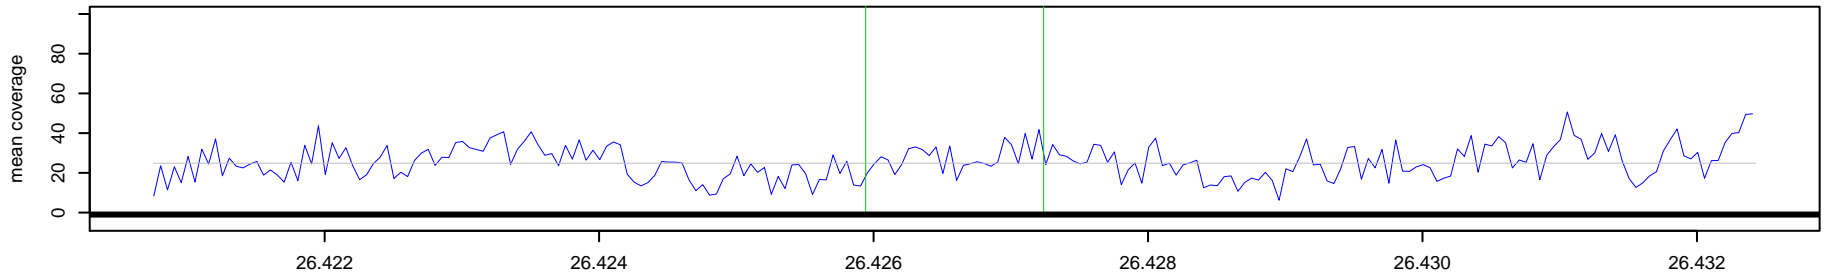

129\_NA10851 Chr 3 : 26425943 – 26427239 , 1297 bp (aCGH relative log2ratio= 0.83 )

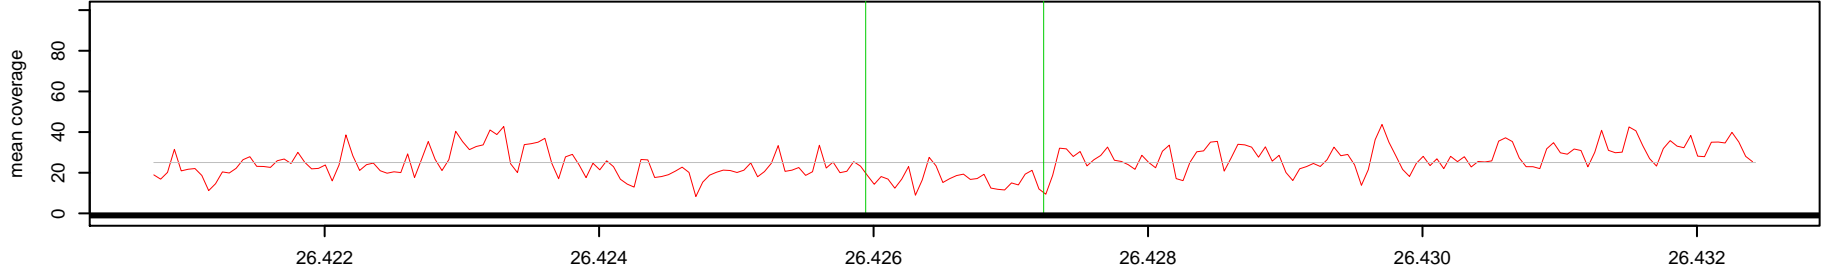

Log2( AK1 read depth / NA10851 read depth)

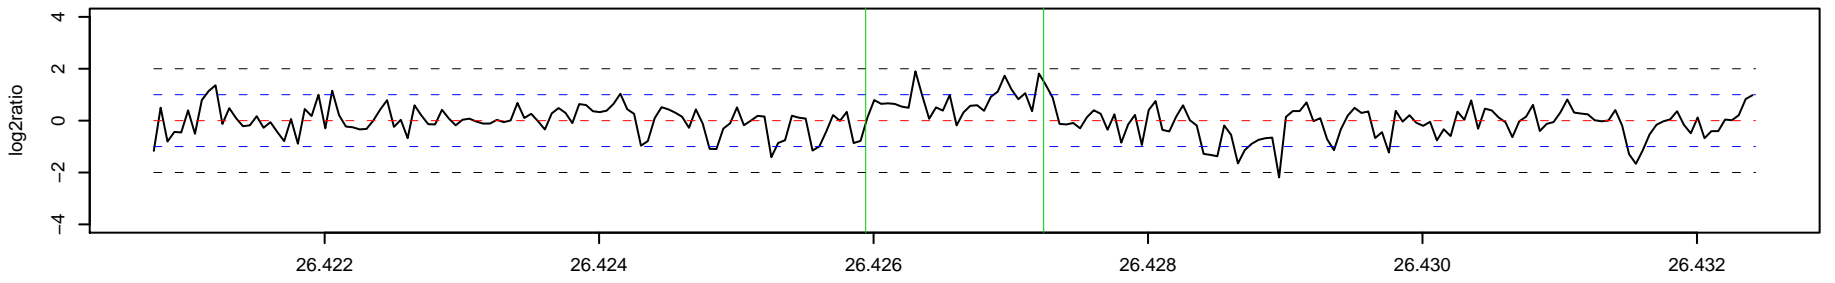

130\_AK1 Chr 3 : 27614096 – 27620862 , 6767 bp (aCGH relative log2ratio= 0.52 )

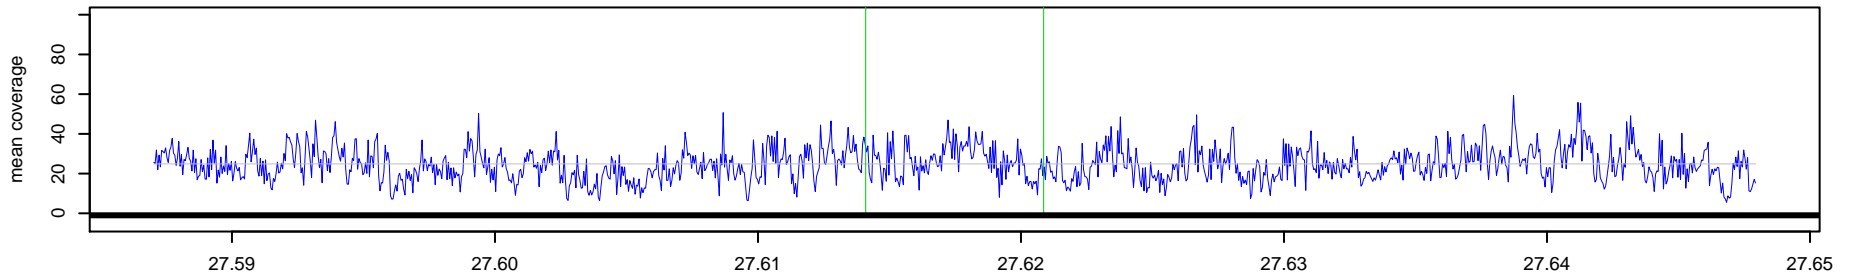

130\_NA10851 Chr 3 : 27614096 – 27620862 , 6767 bp (aCGH relative log2ratio= 0.52 )

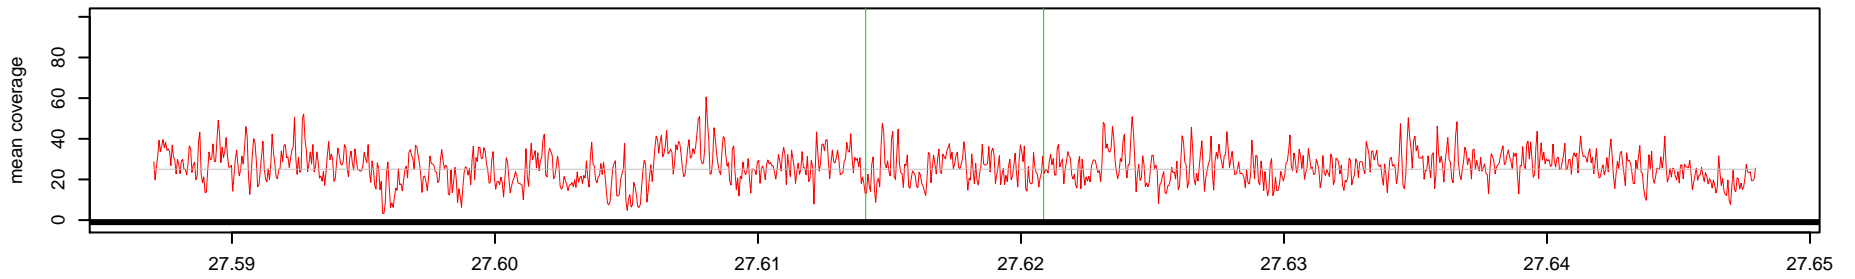

Log2( AK1 read depth / NA10851 read depth)

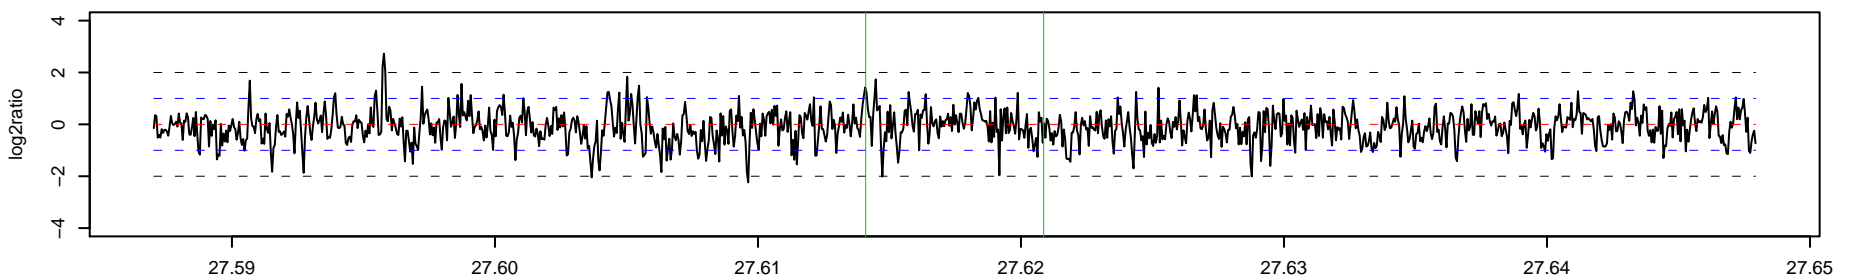

131 \_ AK1 Chr 3 : 30227902 – 30229364 , 1463 bp (aCGH relative log2ratio= -0.57 )

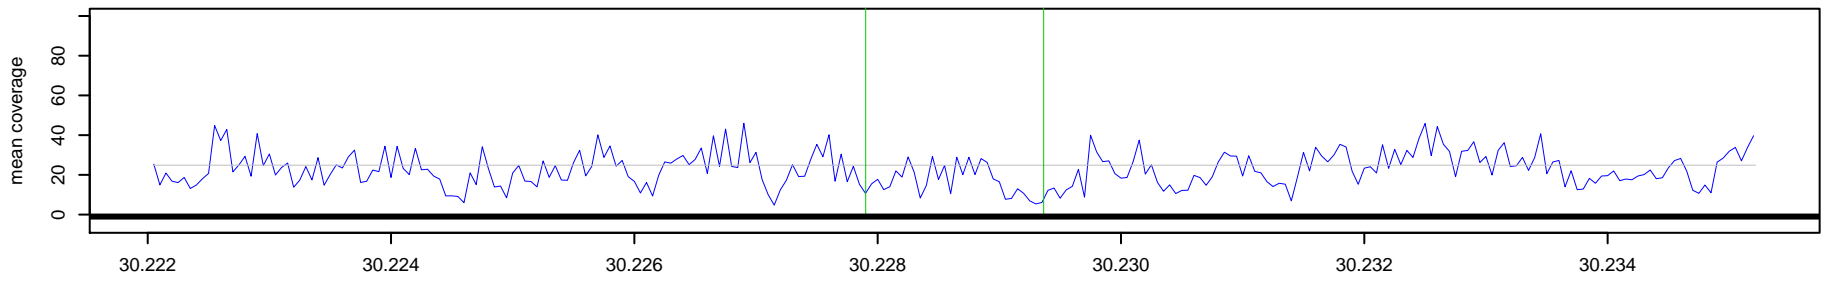

131 \_ NA10851 Chr 3 : 30227902 – 30229364 , 1463 bp (aCGH relative log2ratio= -0.57 )

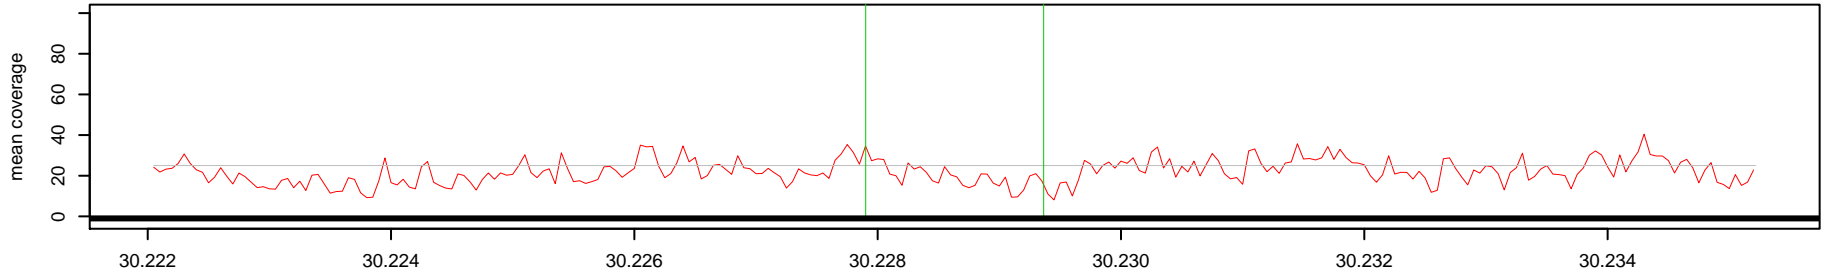

Log2( AK1 read depth / NA10851 read depth)

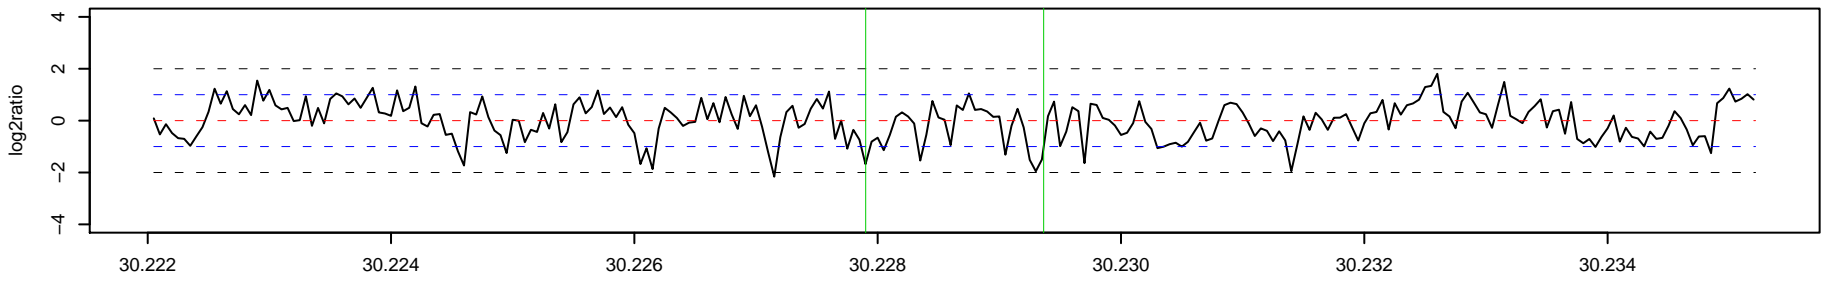

132 \_ AK1 Chr 3 : 32077054 – 32082088 , 5035 bp (aCGH relative log2ratio= 0.79 )

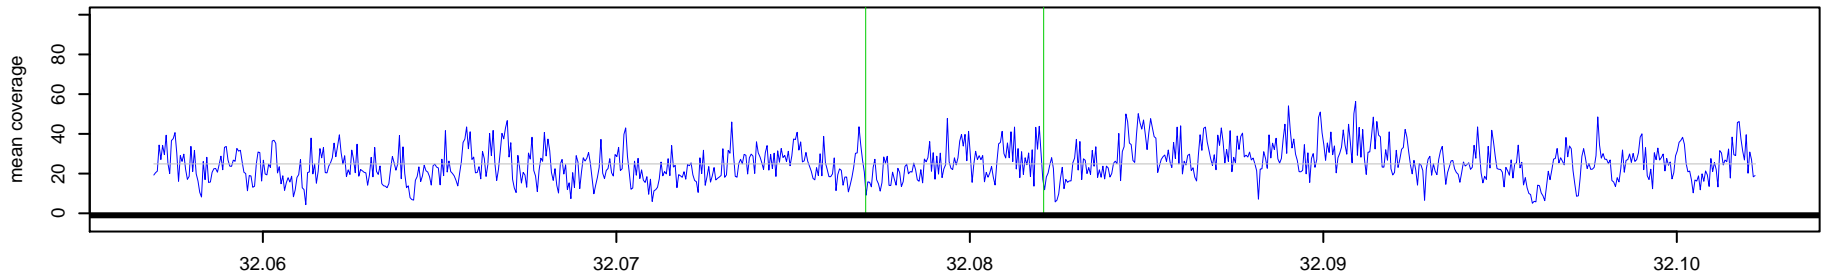

132 \_ NA10851 Chr 3 : 32077054 – 32082088 , 5035 bp (aCGH relative log2ratio= 0.79 )

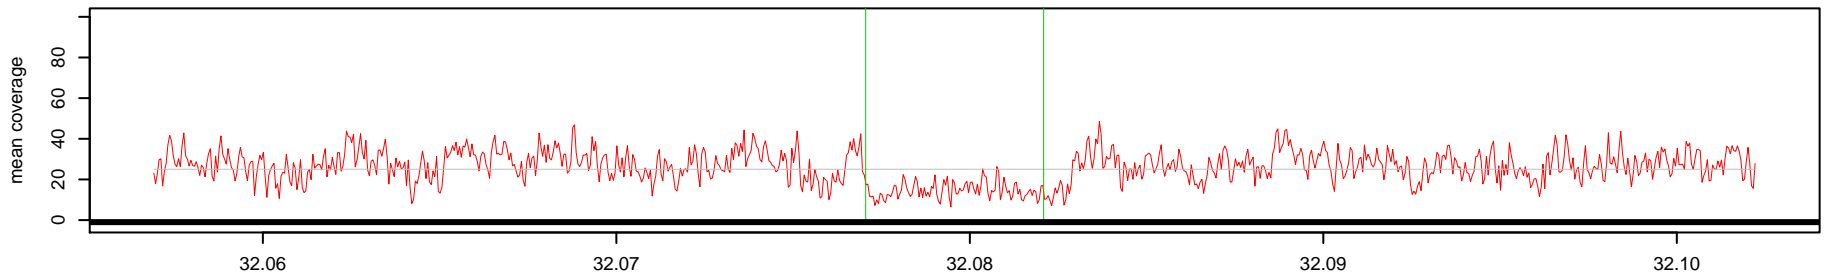

Log2( AK1 read depth / NA10851 read depth)

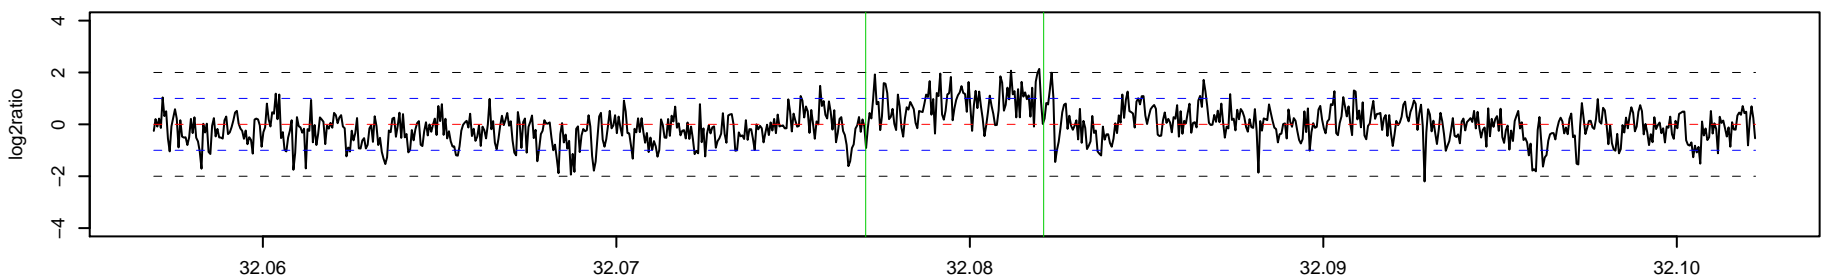

133\_AK1 Chr 3 : 36282987 – 36290050 , 7064 bp (aCGH relative log2ratio= -0.94 )

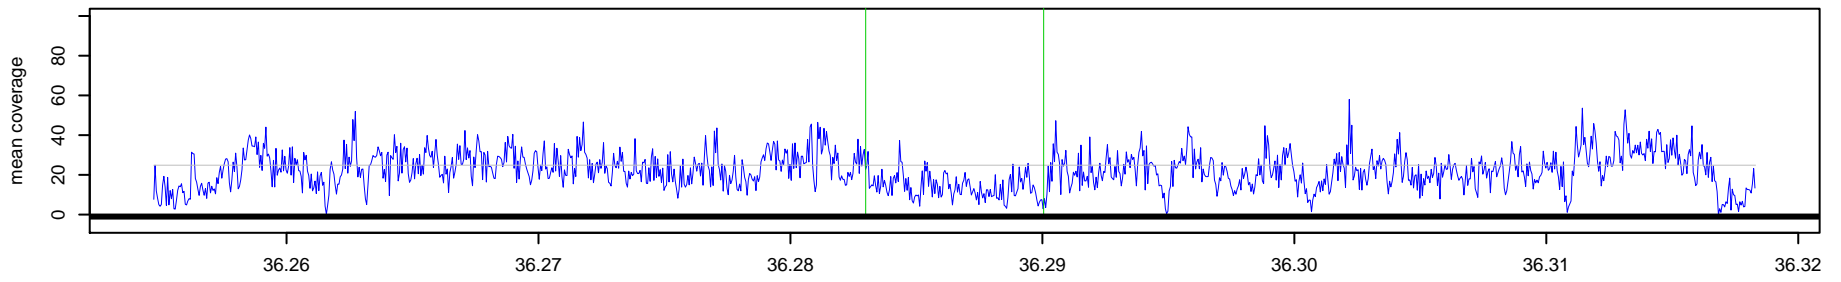

133\_NA10851 Chr 3 : 36282987 – 36290050 , 7064 bp (aCGH relative log2ratio= -0.94 )

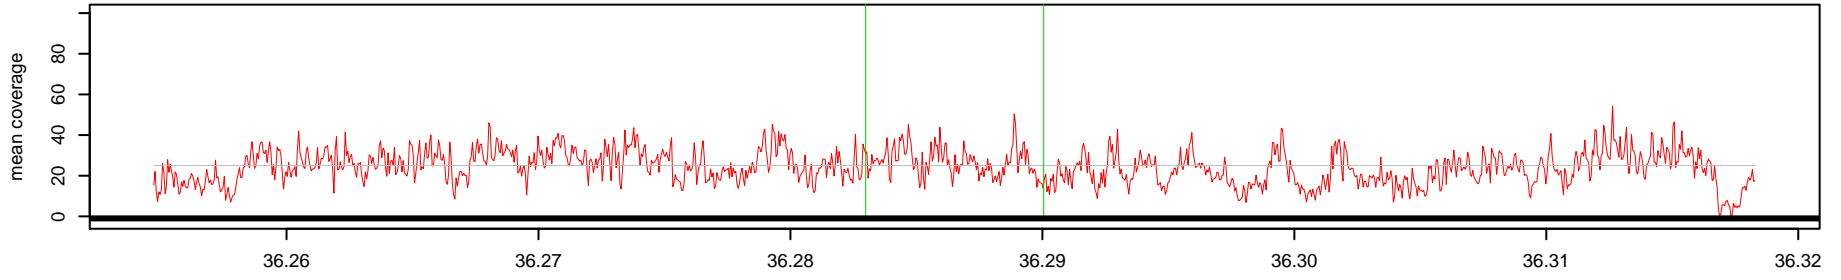

Log2( AK1 read depth / NA10851 read depth)

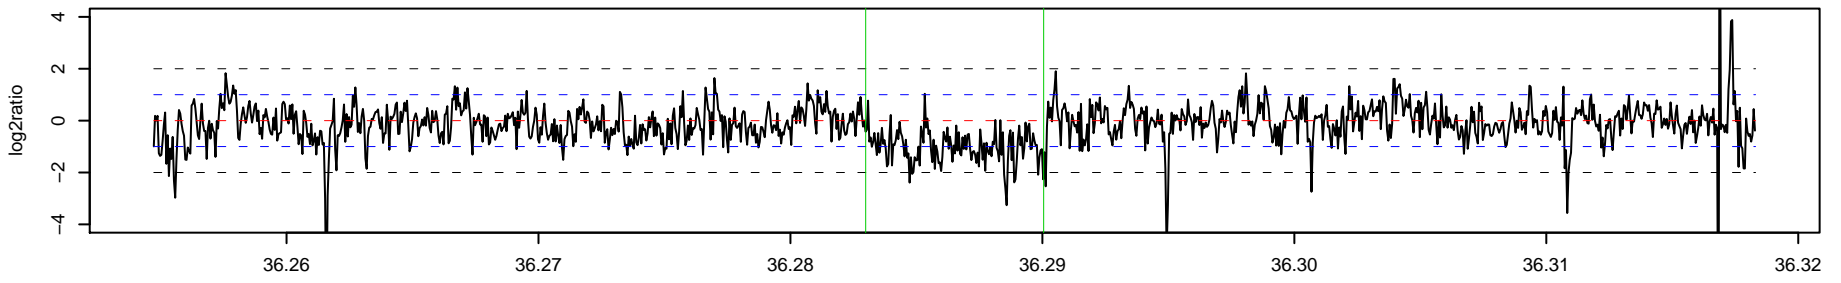

134\_AK1 Chr 3 : 50098737 – 50099516 , 780 bp (aCGH relative log2ratio= 0.90 )

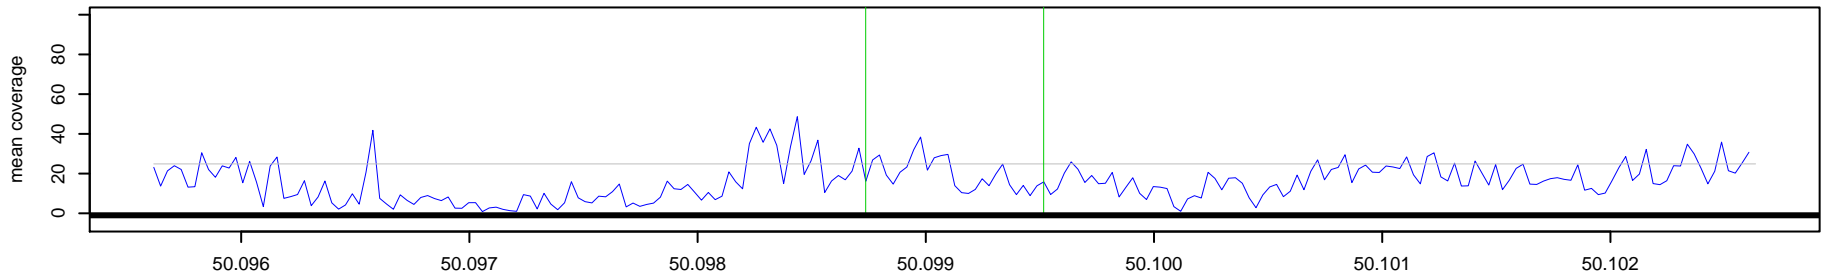

134\_NA10851 Chr 3 : 50098737 – 50099516 , 780 bp (aCGH relative log2ratio= 0.90 )

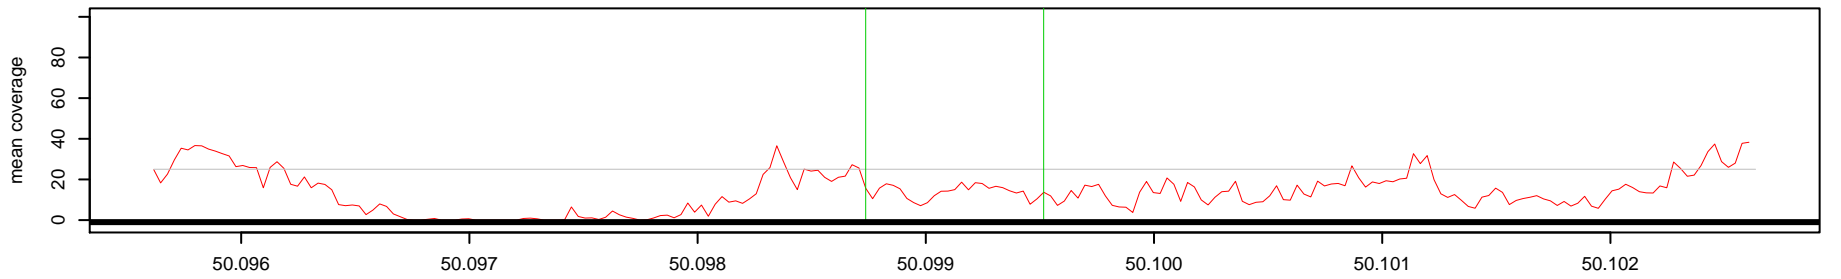

Log2( AK1 read depth / NA10851 read depth)

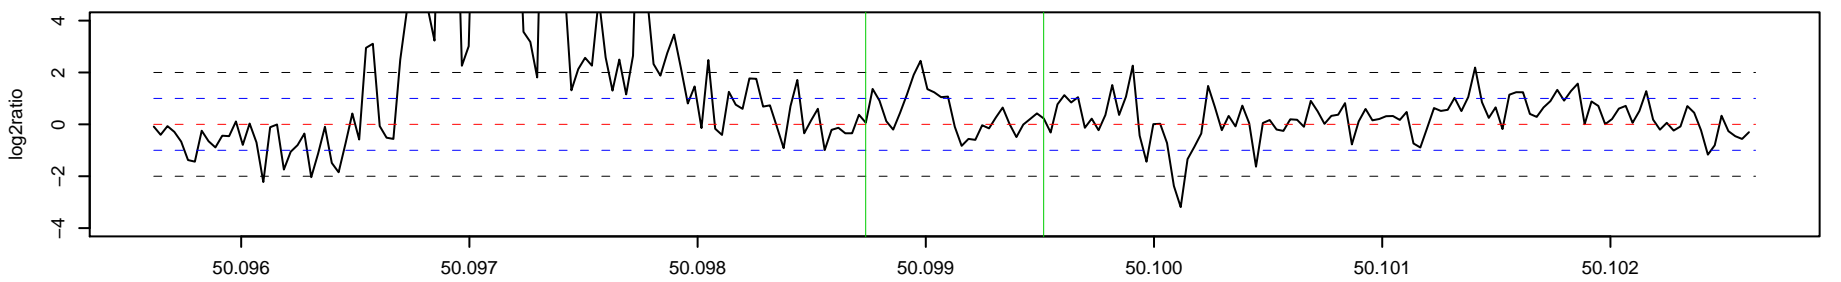

135\_AK1 Chr 3 : 64969993 – 64970861 , 869 bp (aCGH relative log2ratio= 0.50 )

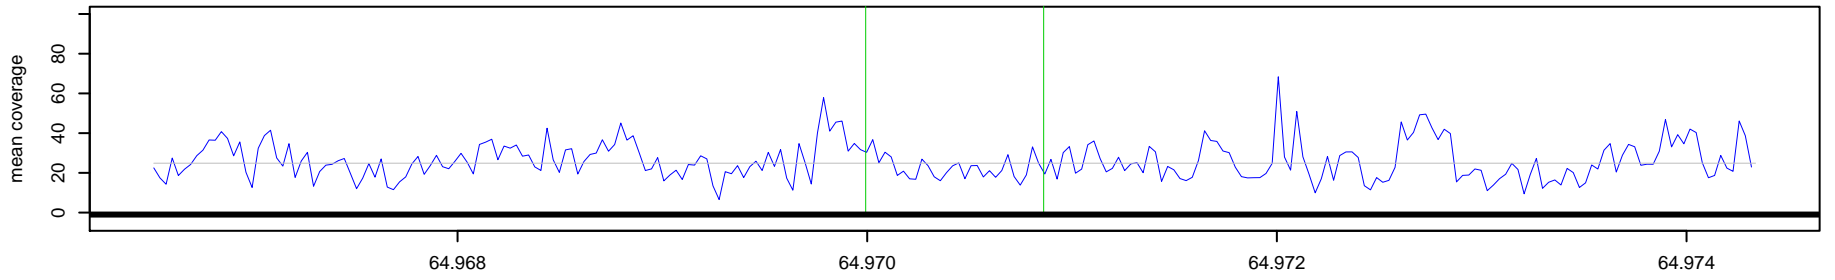

135\_NA10851 Chr 3 : 64969993 – 64970861 , 869 bp (aCGH relative log2ratio= 0.50 )

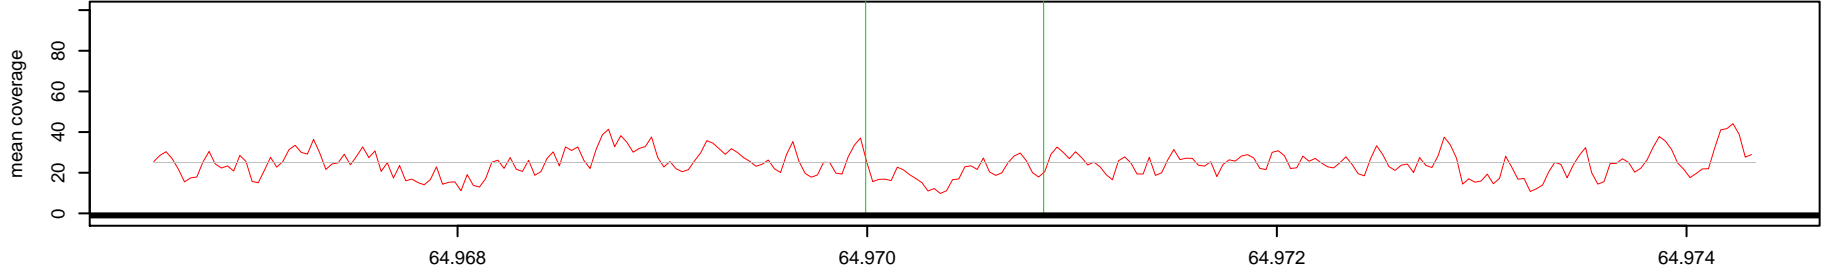

Log2( AK1 read depth / NA10851 read depth)

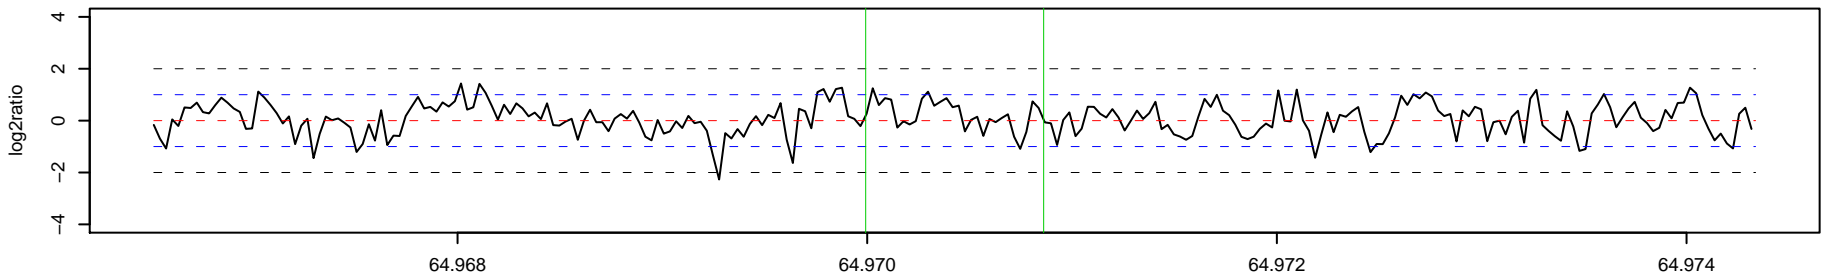

136\_AK1 Chr 3 : 65093070 – 65094005 , 936 bp (aCGH relative log2ratio= 0.81 )

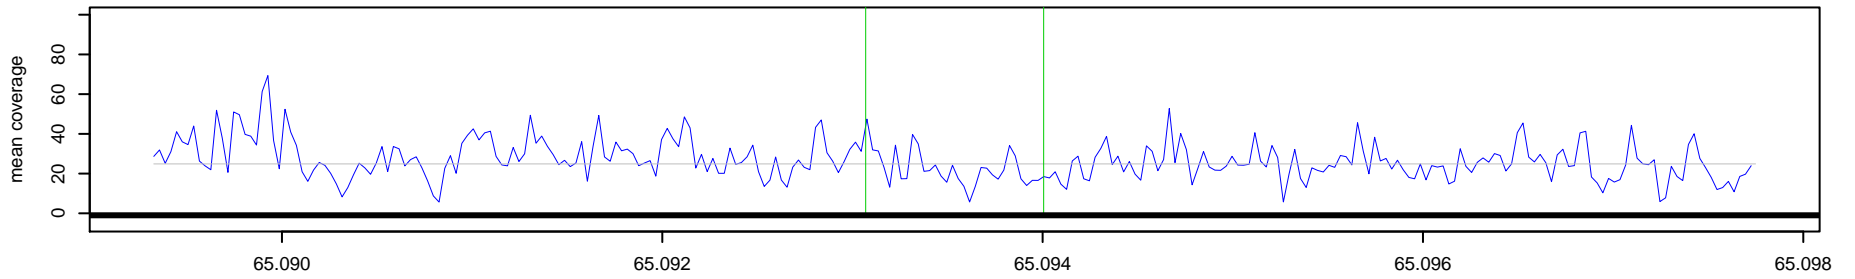

136\_NA10851 Chr 3 : 65093070 – 65094005 , 936 bp (aCGH relative log2ratio= 0.81 )

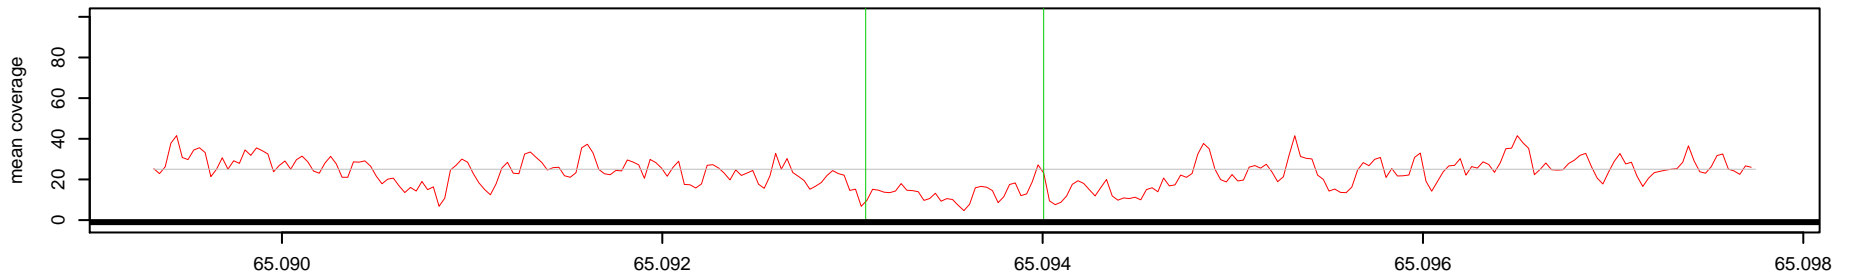

Log2( AK1 read depth / NA10851 read depth)

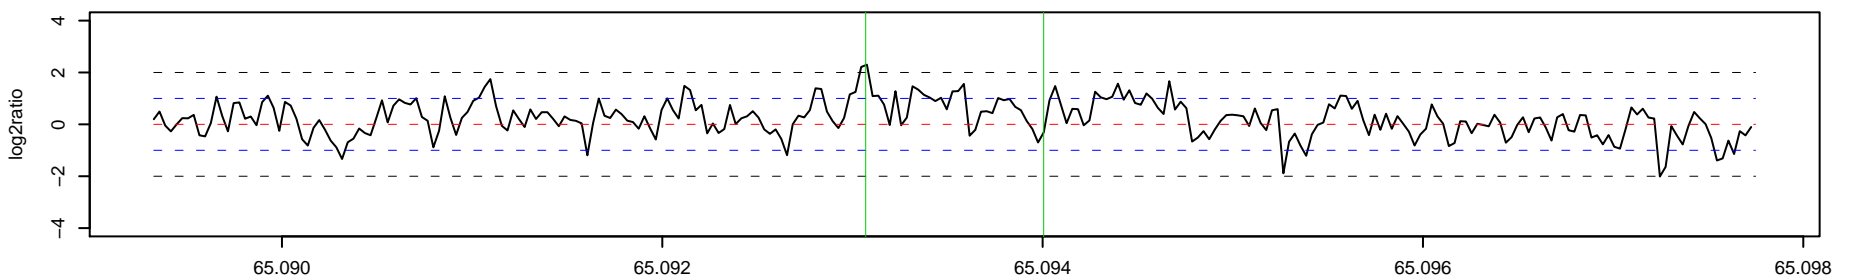



137\_AK1 Chr 3 : 68718920 – 68723027 , 4108 bp (aCGH relative log2ratio= -2.68 )

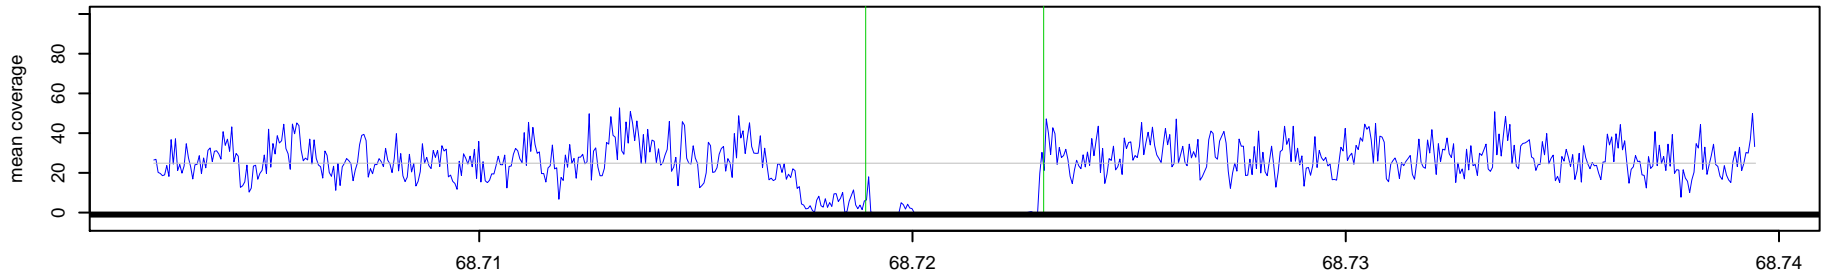

137\_NA10851 Chr 3 : 68718920 – 68723027 , 4108 bp (aCGH relative log2ratio= -2.68 )

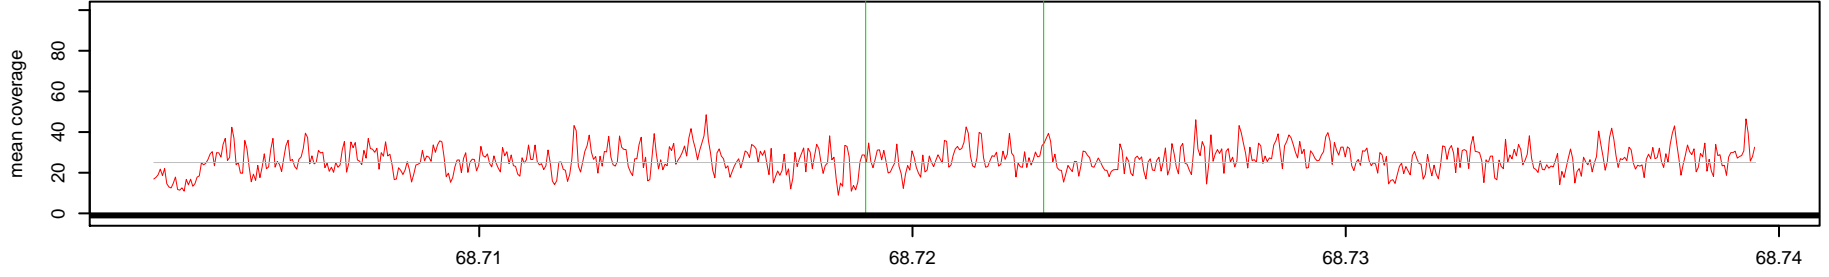

Log2( AK1 read depth / NA10851 read depth)

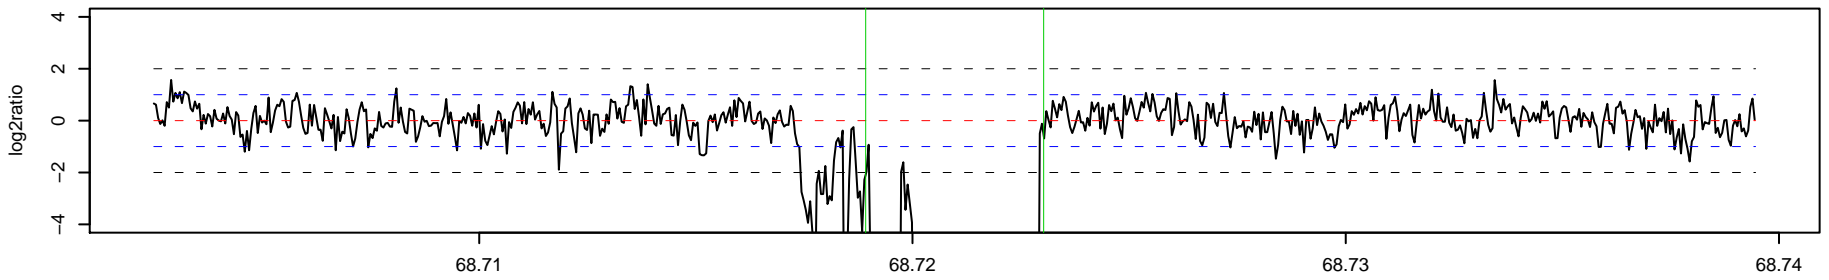

138\_AK1 Chr 3 : 68823827 – 68830503 , 6677 bp (aCGH relative log2ratio= -2.88 )

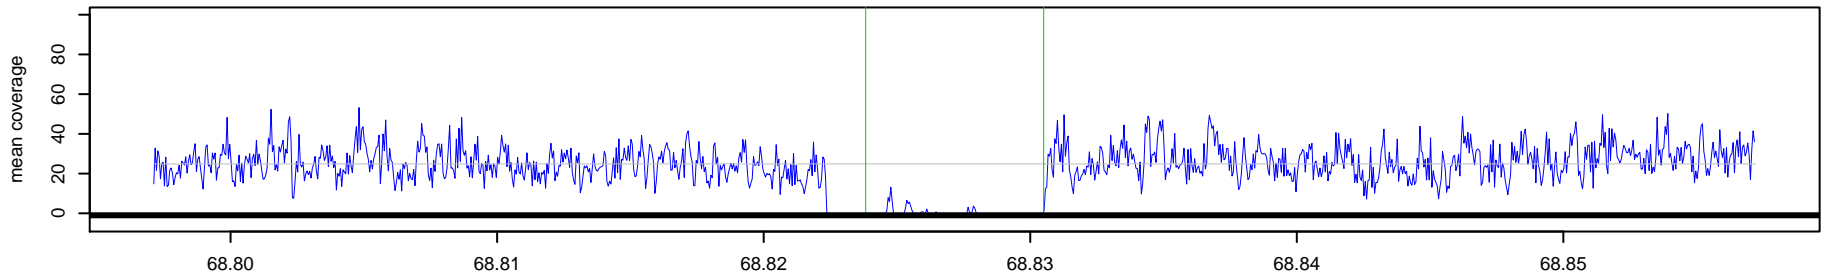

138\_NA10851 Chr 3 : 68823827 – 68830503 , 6677 bp (aCGH relative log2ratio= -2.88 )

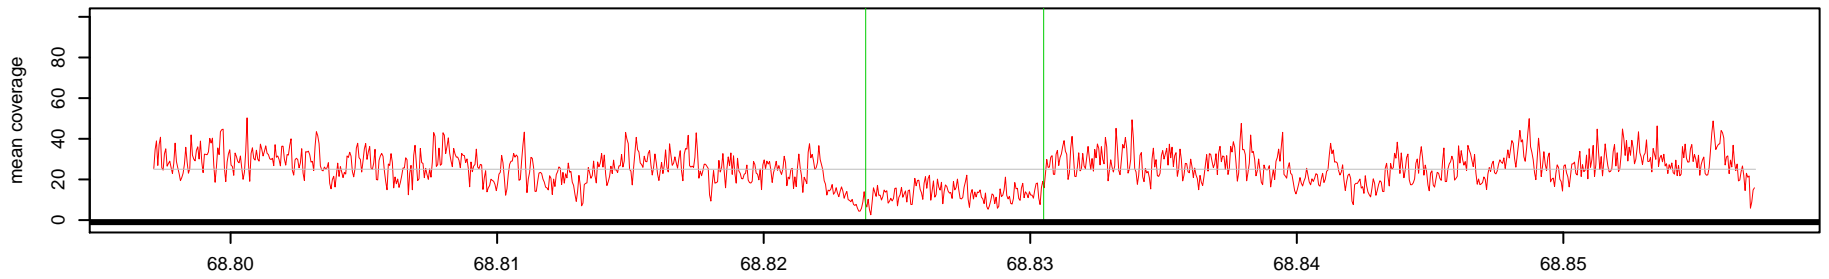

Log2( AK1 read depth / NA10851 read depth)

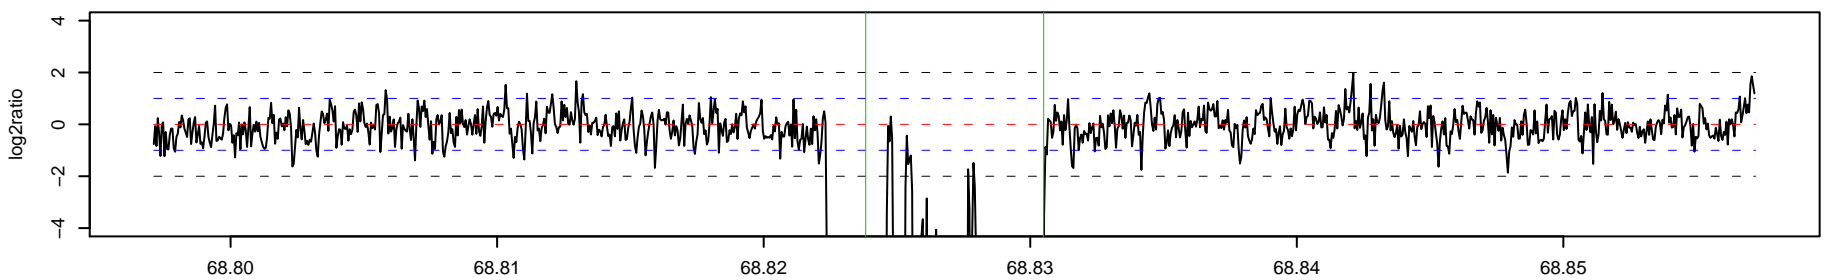

139\_AK1 Chr 3 : 69239767 – 69240207 , 441 bp (aCGH relative log2ratio= -0.39 )

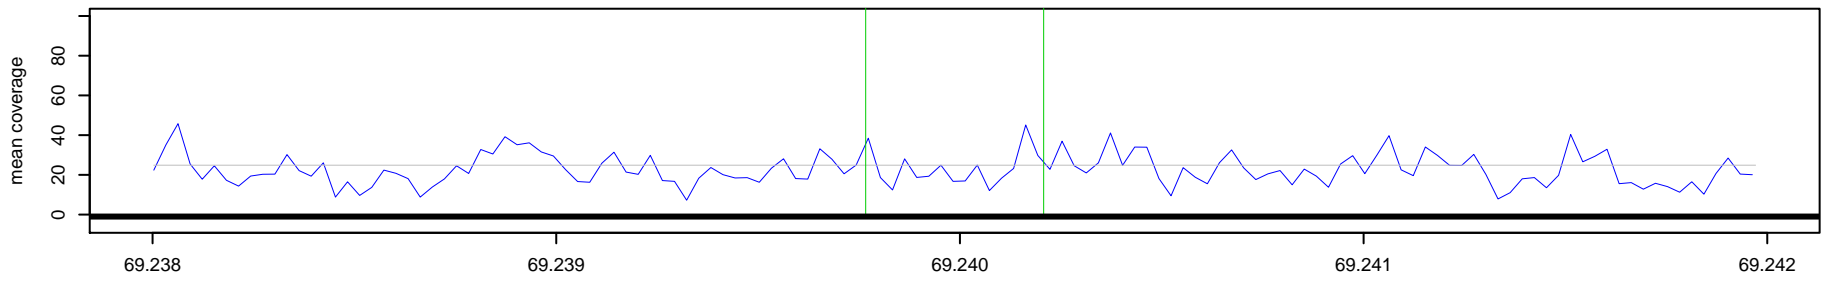

139\_NA10851 Chr 3 : 69239767 – 69240207 , 441 bp (aCGH relative log2ratio= -0.39 )

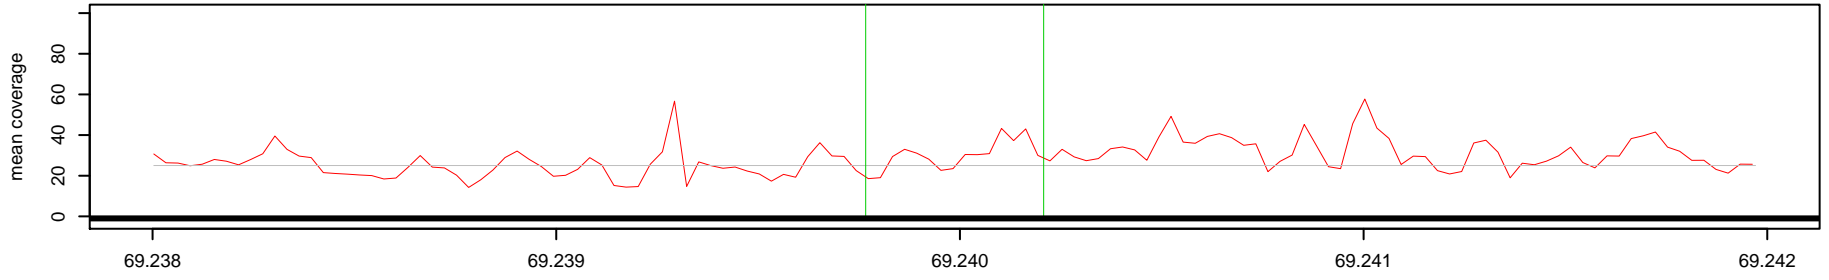

Log2( AK1 read depth / NA10851 read depth)

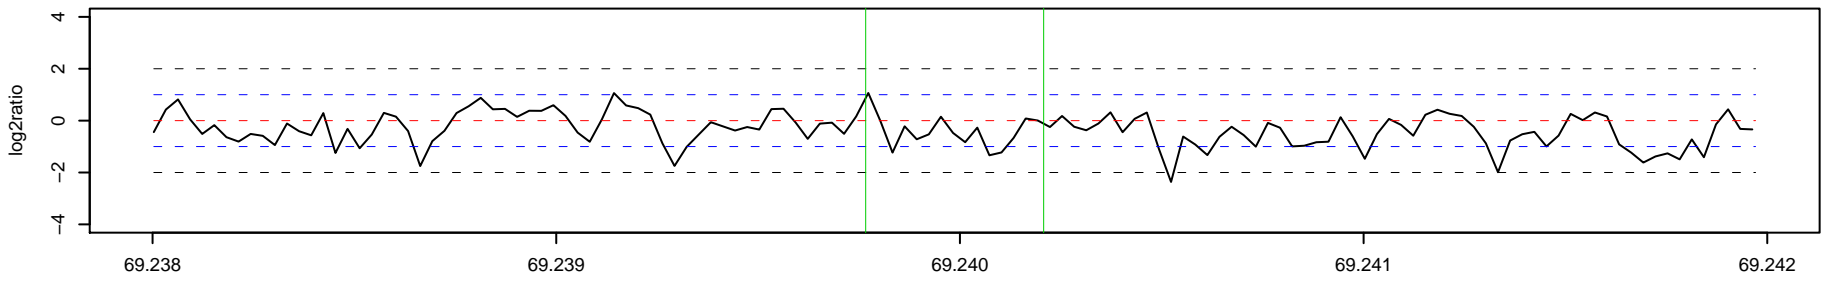

140\_AK1 Chr 3 : 69263179 – 69264134 , 956 bp (aCGH relative log2ratio= -4.33 )

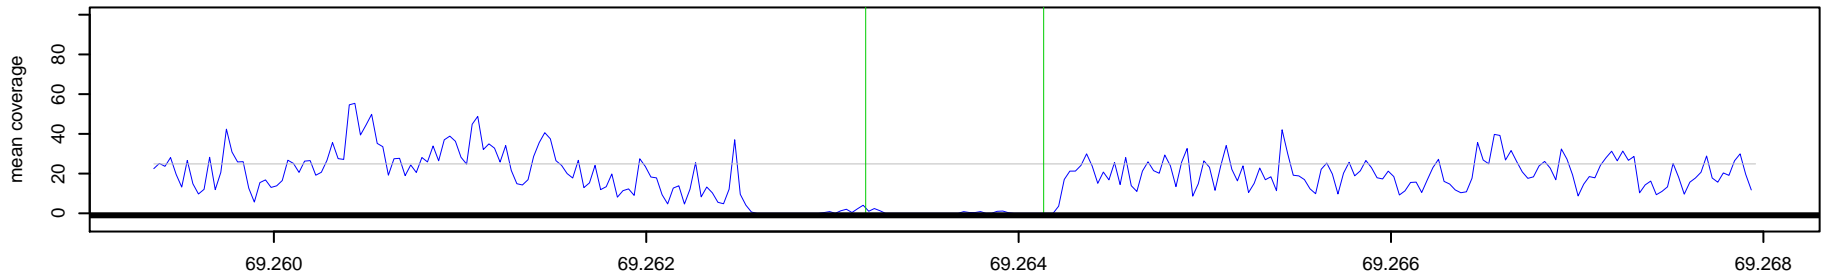

140\_NA10851 Chr 3 : 69263179 – 69264134 , 956 bp (aCGH relative log2ratio= -4.33 )

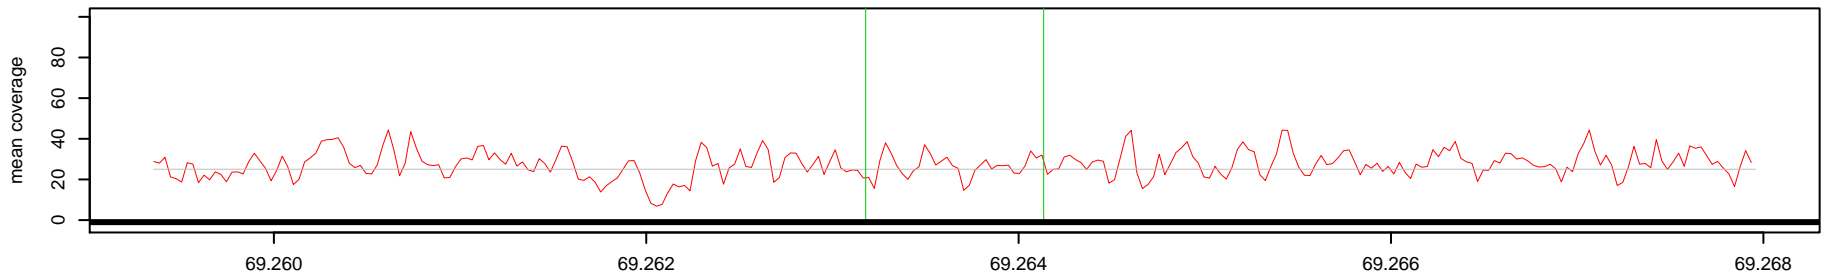

Log2( AK1 read depth / NA10851 read depth)

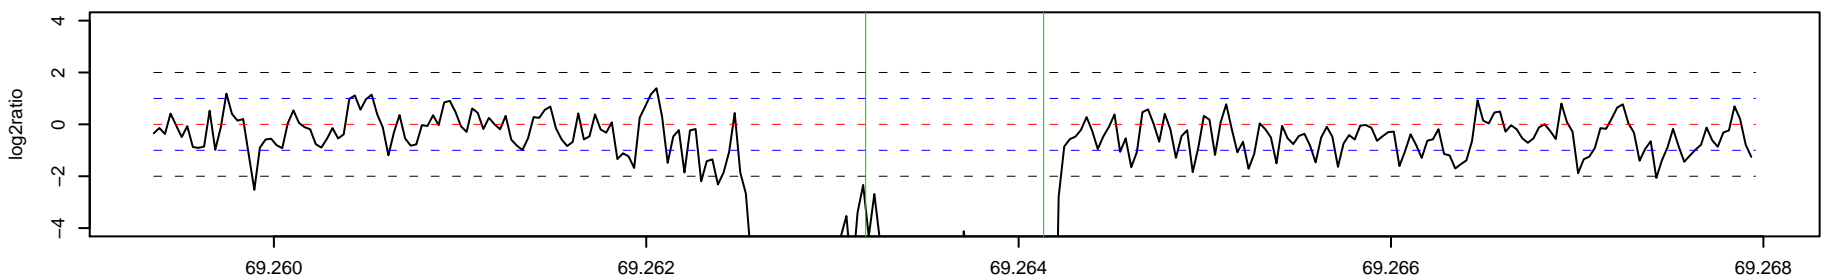

141 \_ AK1 Chr 3 : 76066152 – 76081263 , 15112 bp (aCGH relative log2ratio= 0.42 )

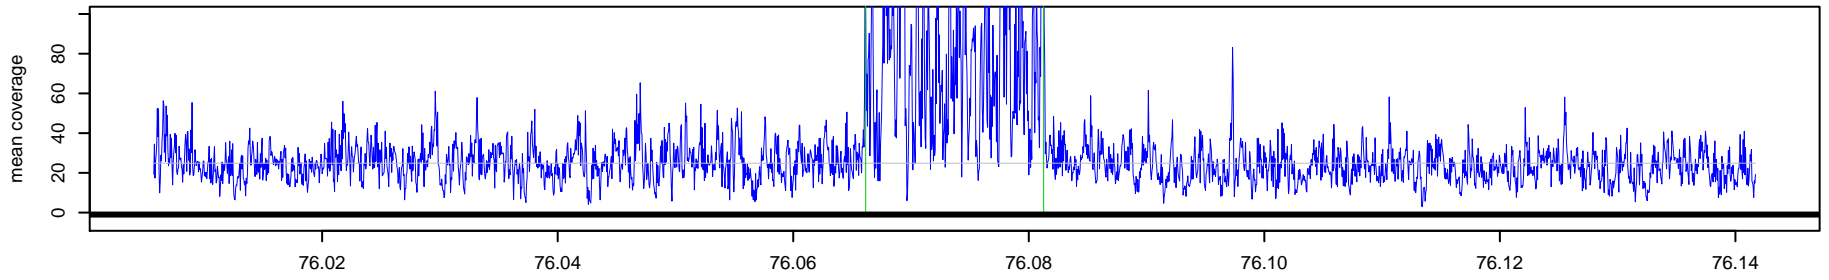

141 \_ NA10851 Chr 3 : 76066152 – 76081263 , 15112 bp (aCGH relative log2ratio= 0.42 )

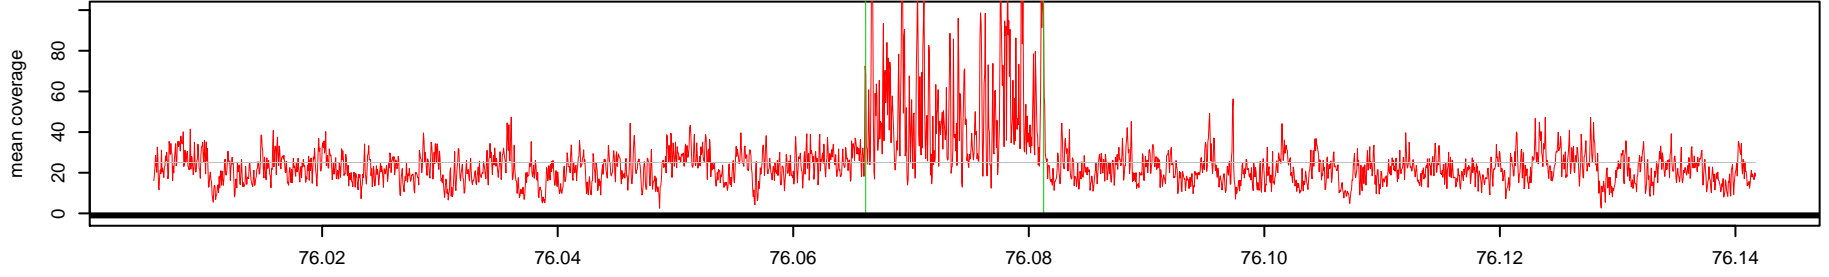

Log2( AK1 read depth / NA10851 read depth)

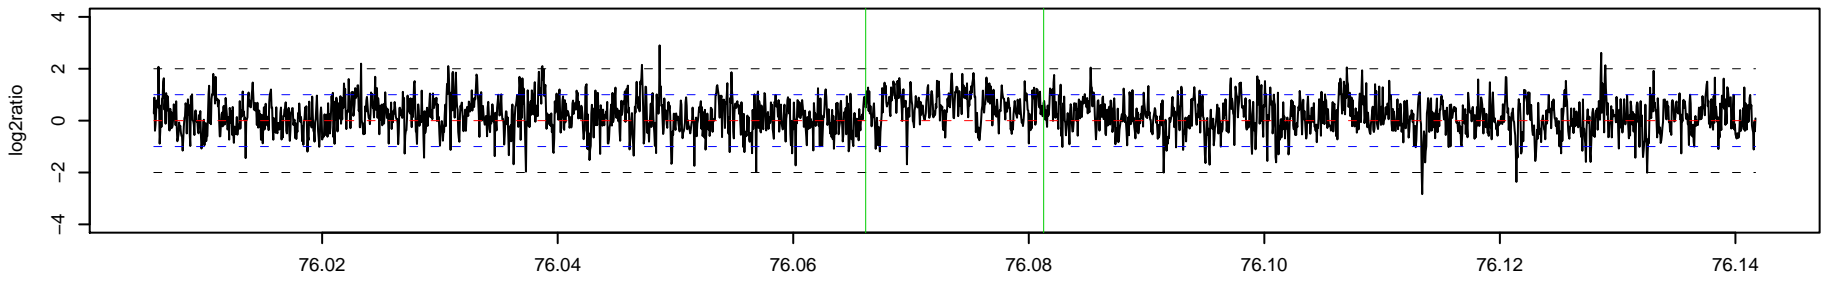

142 \_ AK1 Chr 3 : 77716311 – 77716926 , 616 bp (aCGH relative log2ratio= 0.56 )

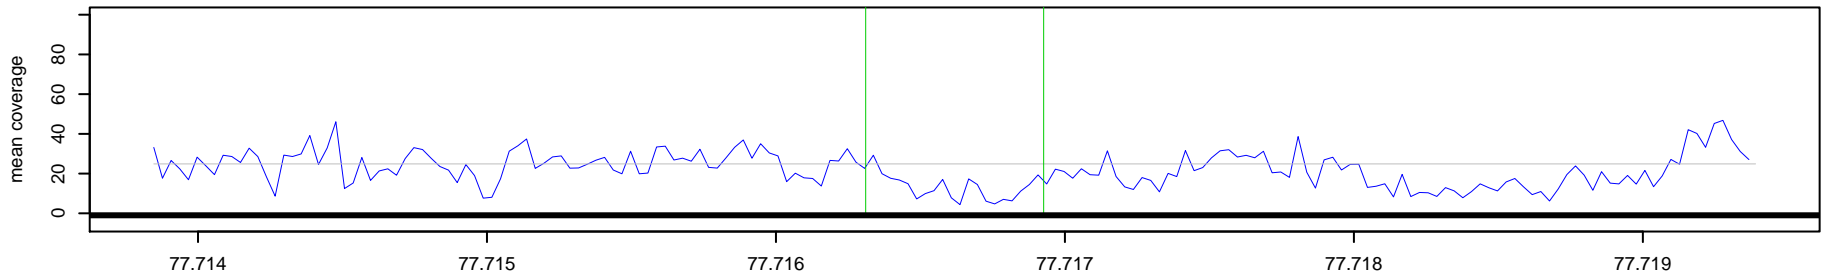

142 \_ NA10851 Chr 3 : 77716311 – 77716926 , 616 bp (aCGH relative log2ratio= 0.56 )

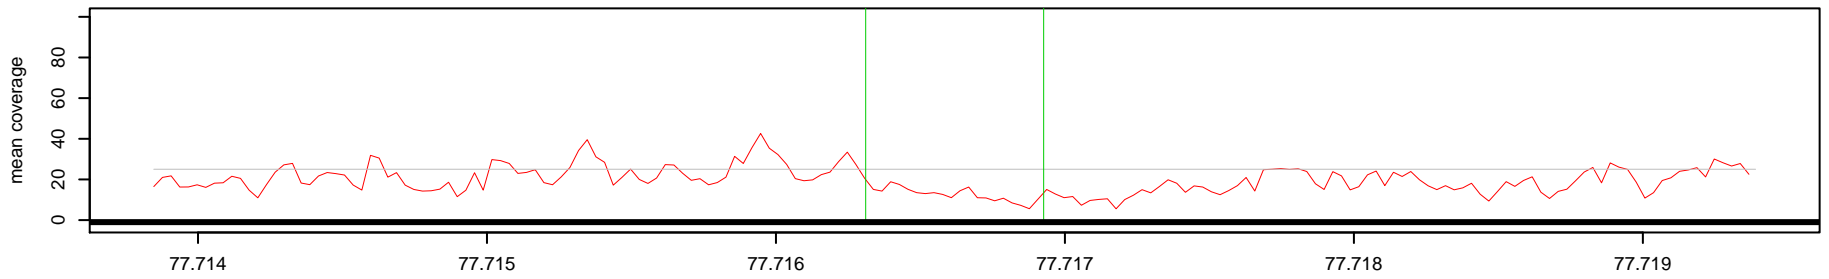

Log2( AK1 read depth / NA10851 read depth)

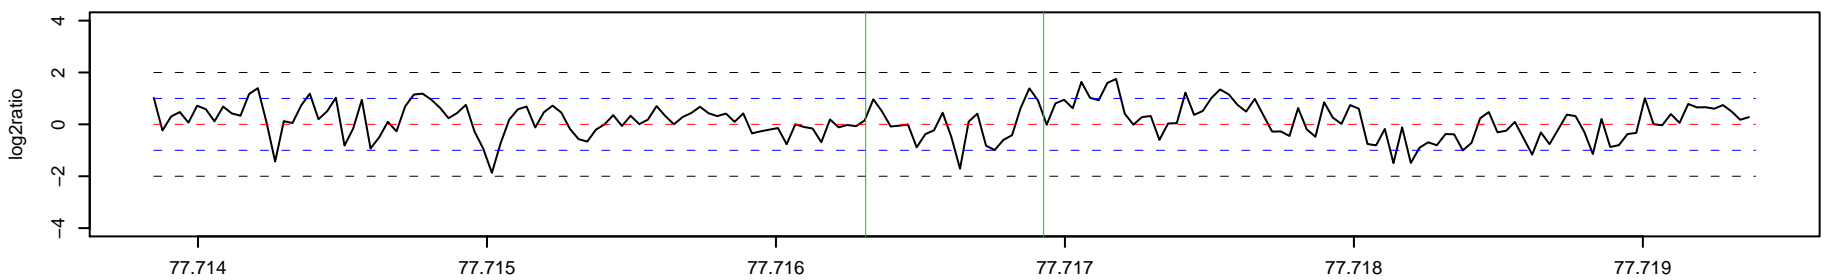

143\_AK1 Chr 3 : 78861996 – 78862483 , 488 bp (aCGH relative log2ratio= -0.63 )

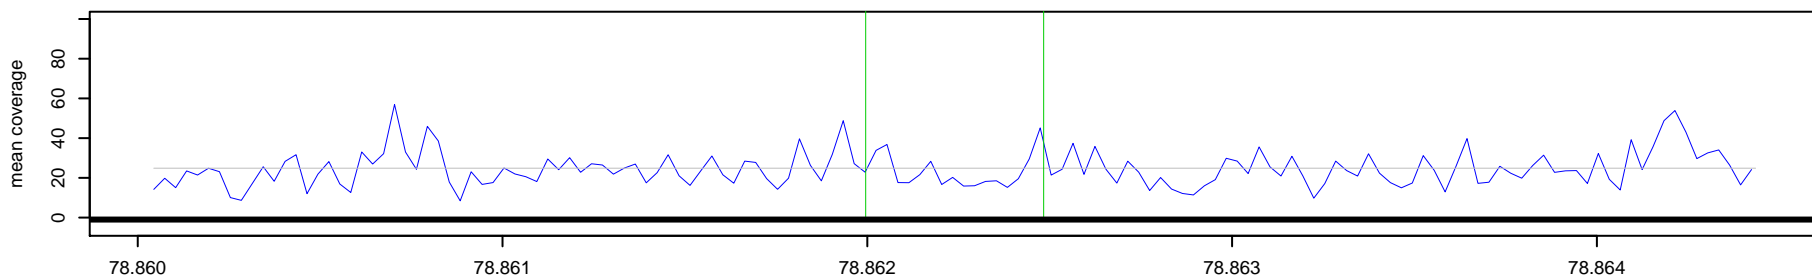

143\_NA10851 Chr 3 : 78861996 – 78862483 , 488 bp (aCGH relative log2ratio= -0.63 )

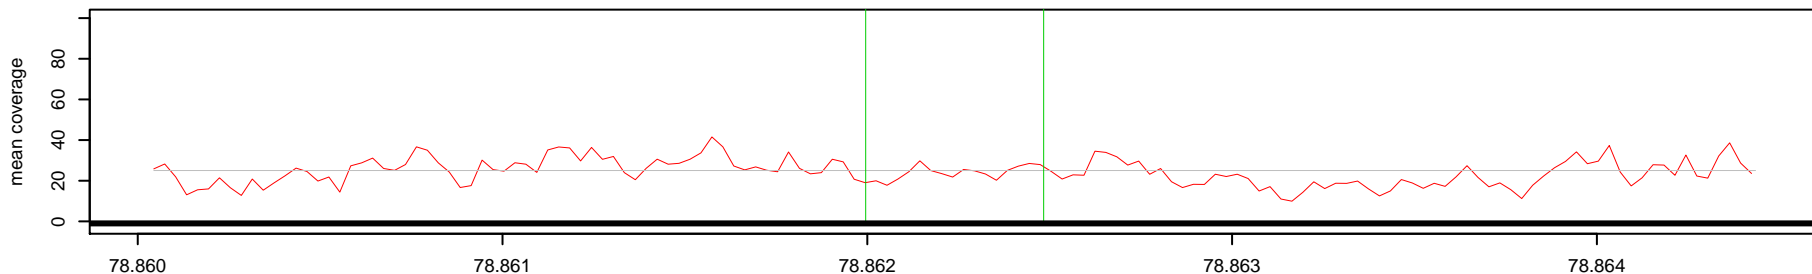

Log2( AK1 read depth / NA10851 read depth)

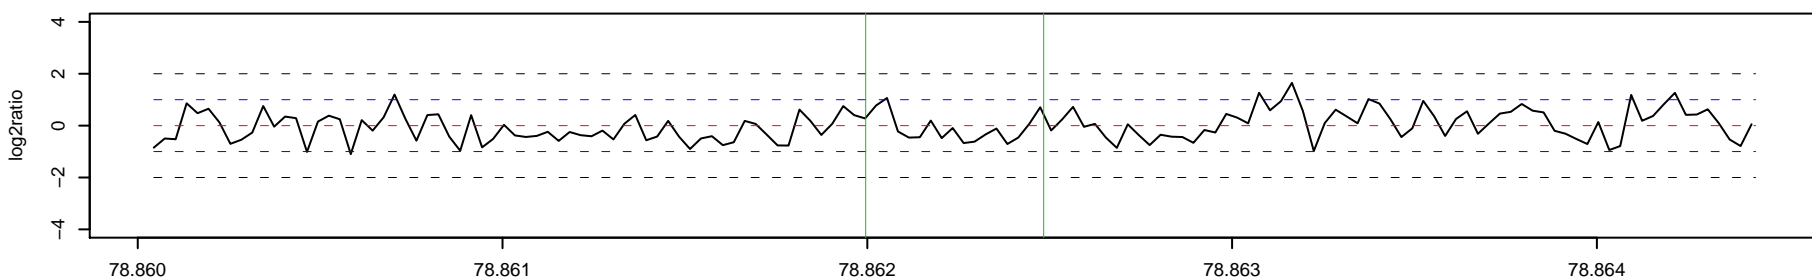

144\_AK1 Chr 3 : 80606697 – 80644933 , 38237 bp (aCGH relative log2ratio= 0.72 )

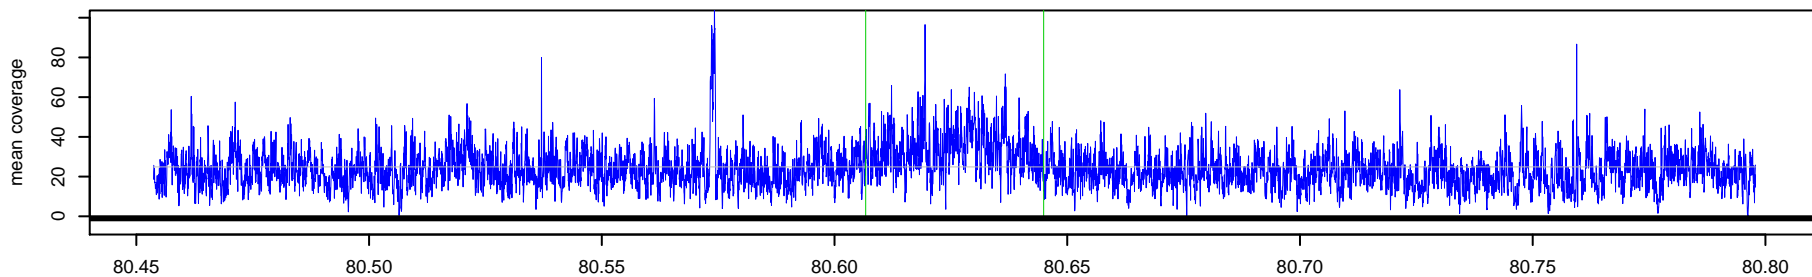

144\_NA10851 Chr 3 : 80606697 – 80644933 , 38237 bp (aCGH relative log2ratio= 0.72 )

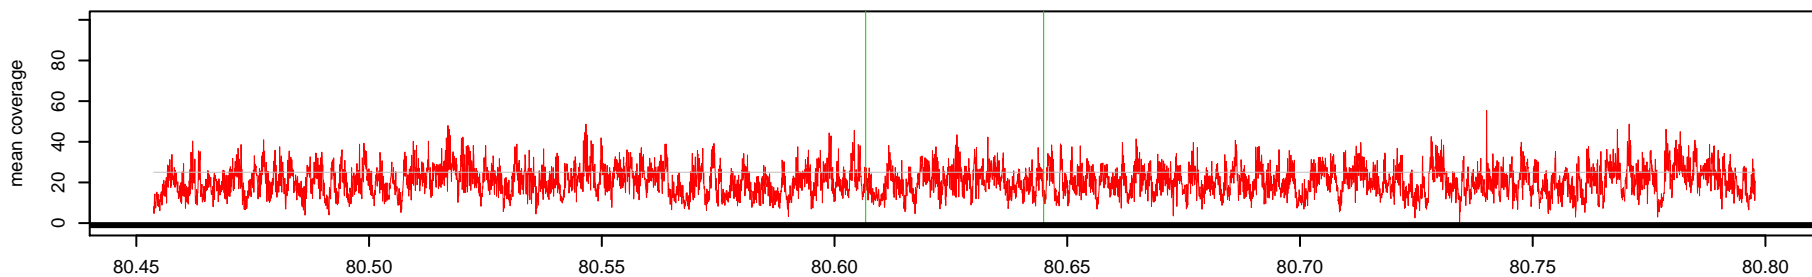

Log2( AK1 read depth / NA10851 read depth)

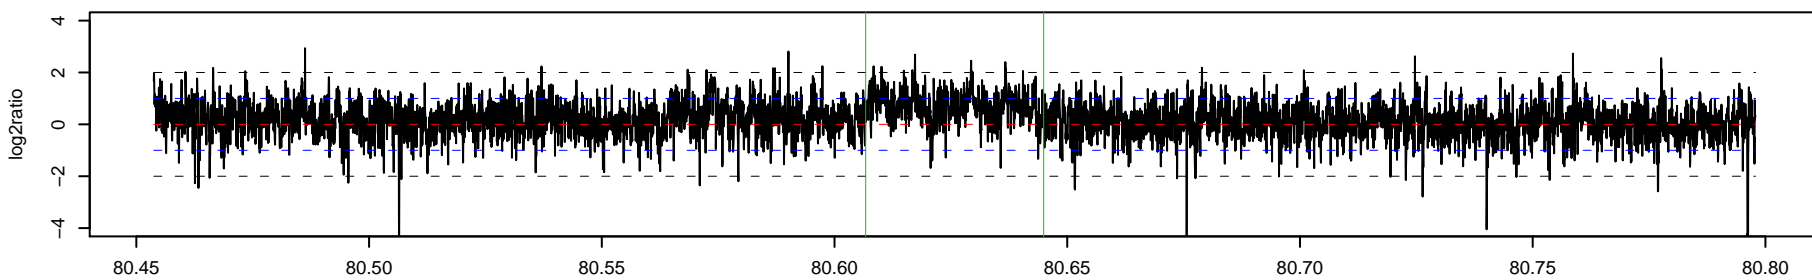

145\_AK1 Chr 3 : 80699288 – 80699789 , 502 bp (aCGH relative log2ratio= 0.59 )

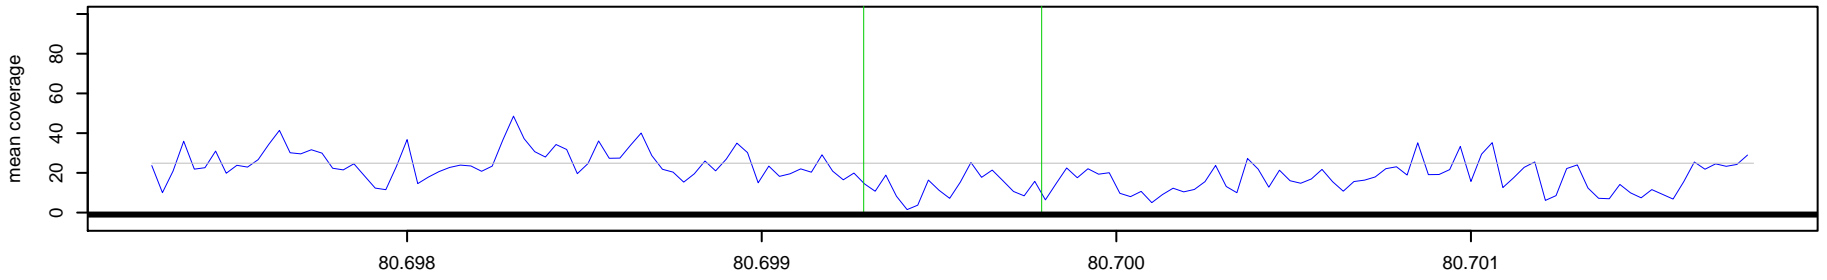

145\_NA10851 Chr 3 : 80699288 – 80699789 , 502 bp (aCGH relative log2ratio= 0.59 )

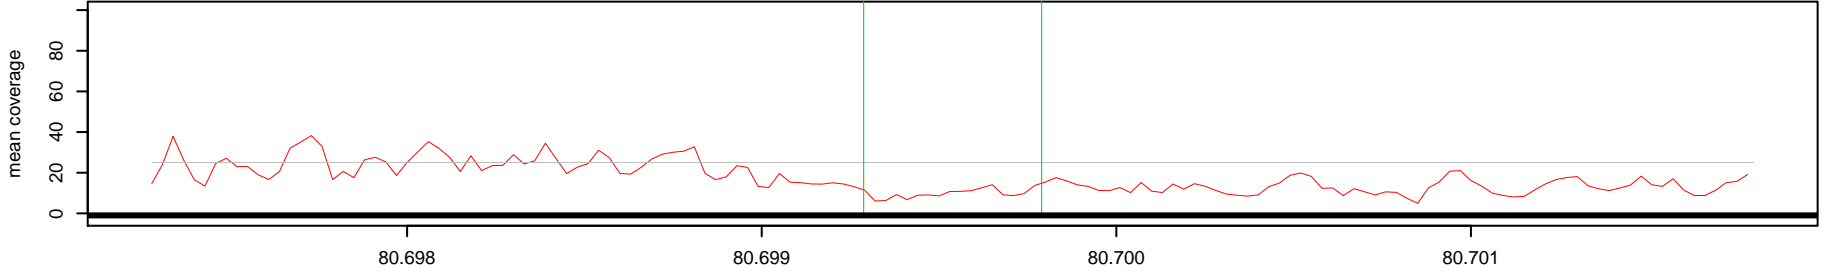

Log2( AK1 read depth / NA10851 read depth)

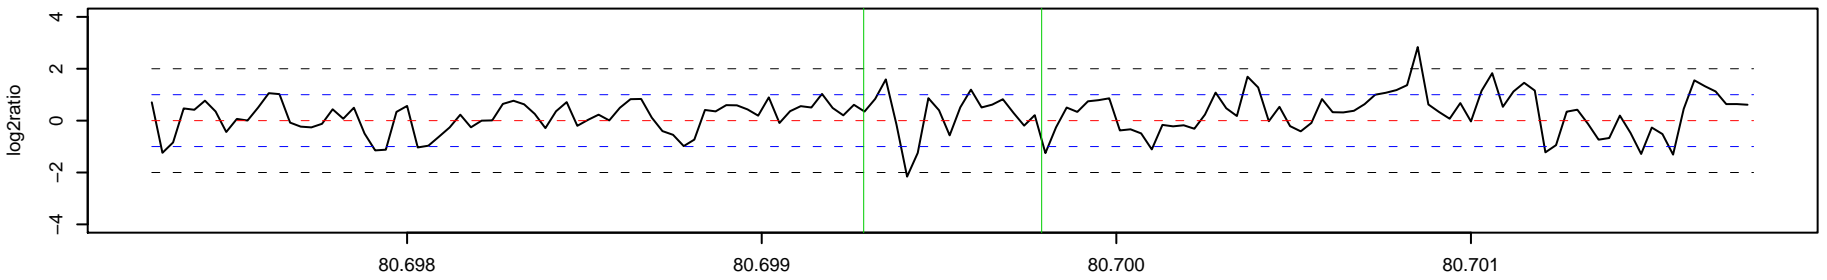

146\_AK1 Chr 3 : 81919026 – 81919505 , 480 bp (aCGH relative log2ratio= 0.58 )

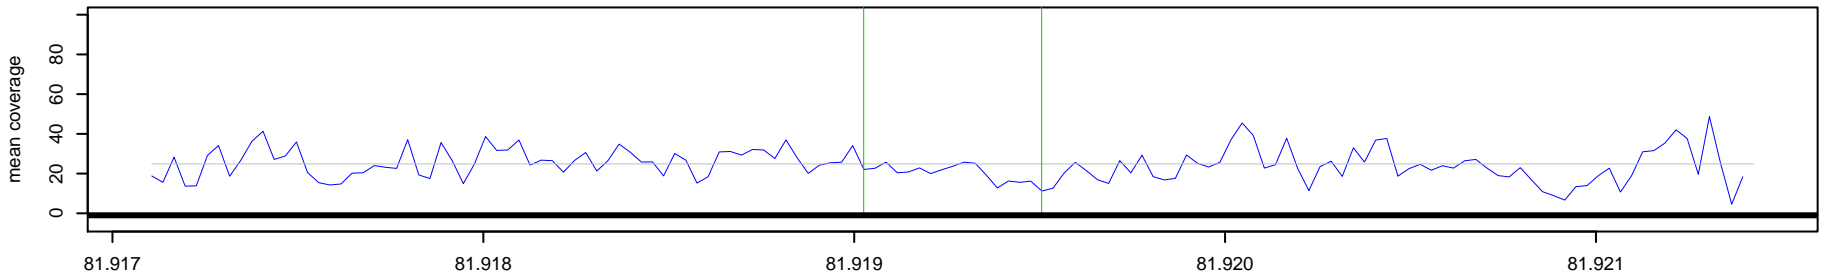

146\_NA10851 Chr 3 : 81919026 – 81919505 , 480 bp (aCGH relative log2ratio= 0.58 )

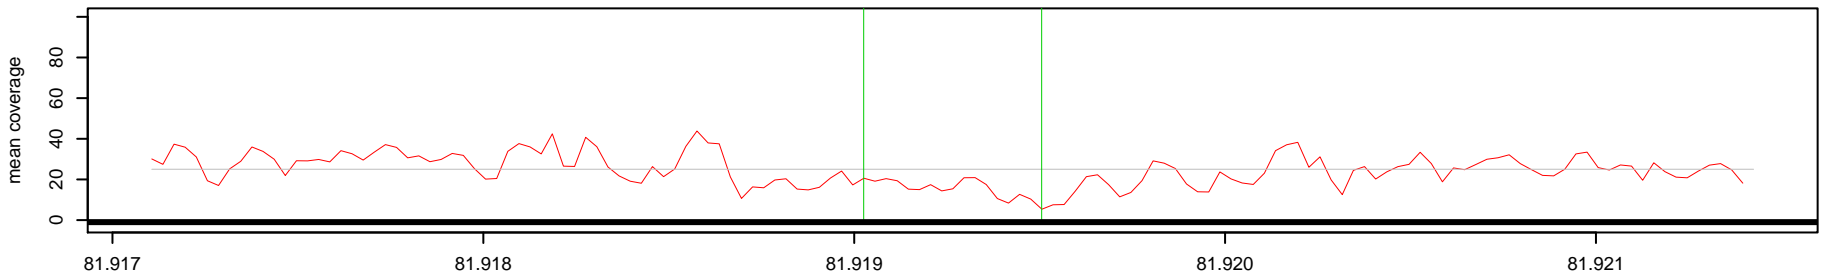

Log2( AK1 read depth / NA10851 read depth)

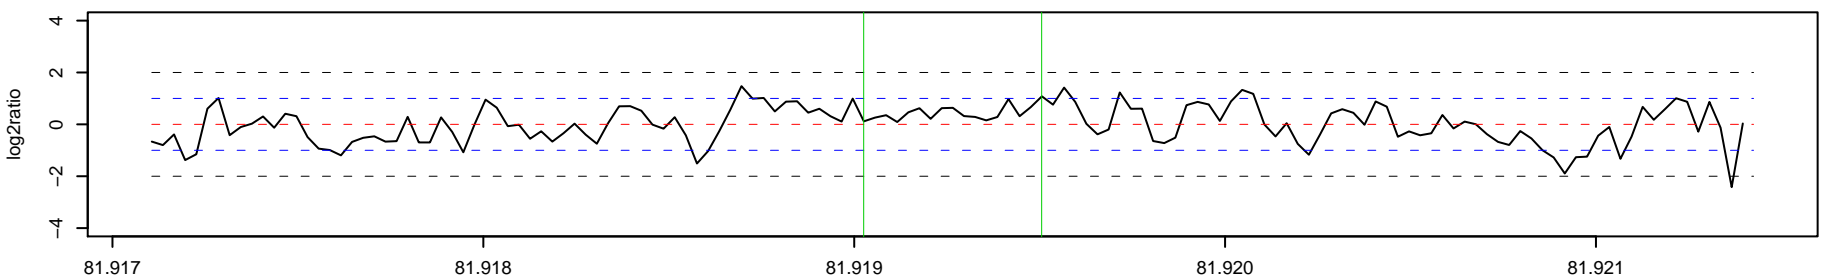

147\_AK1 Chr 3 : 100381712 – 100385035 , 3324 bp (aCGH relative log2ratio= 2.51 )

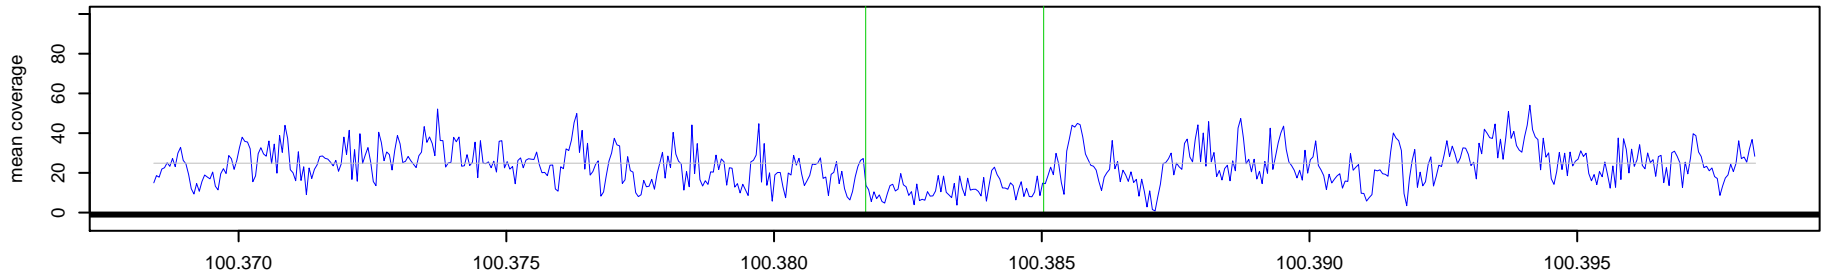

147\_NA10851 Chr 3 : 100381712 – 100385035 , 3324 bp (aCGH relative log2ratio= 2.51 )

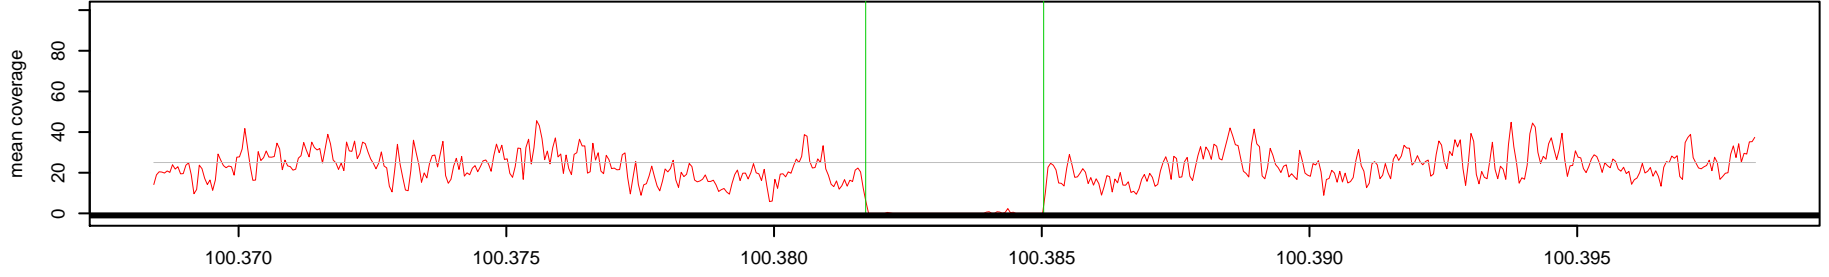

Log2( AK1 read depth / NA10851 read depth)

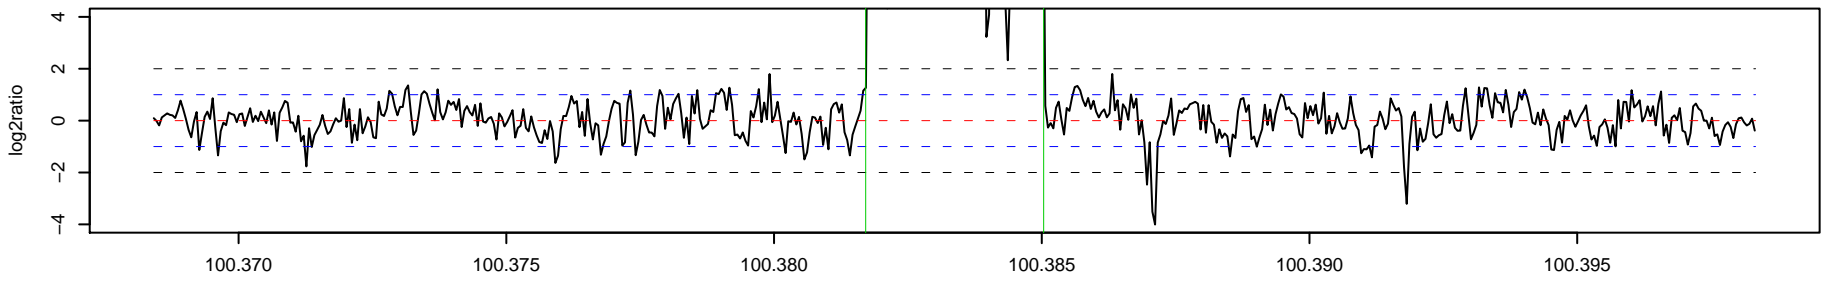

148\_AK1 Chr 3 : 100382867 – 100384017 , 1151 bp (aCGH relative log2ratio= 3.71 )

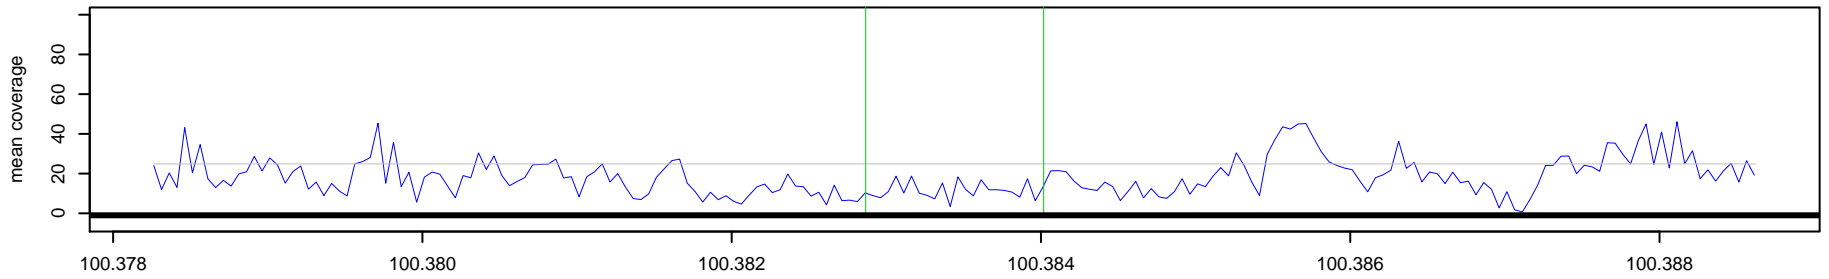

148\_NA10851 Chr 3 : 100382867 – 100384017 , 1151 bp (aCGH relative log2ratio= 3.71 )

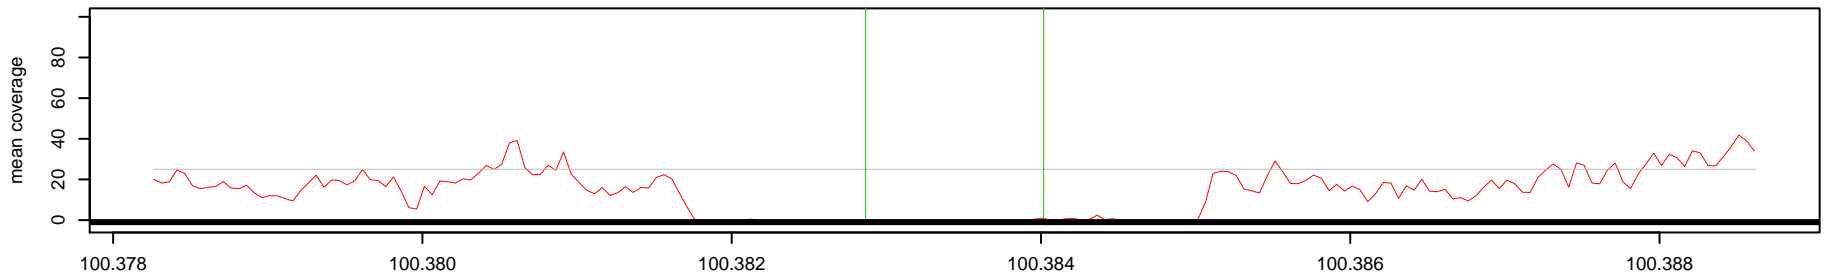

Log2( AK1 read depth / NA10851 read depth)

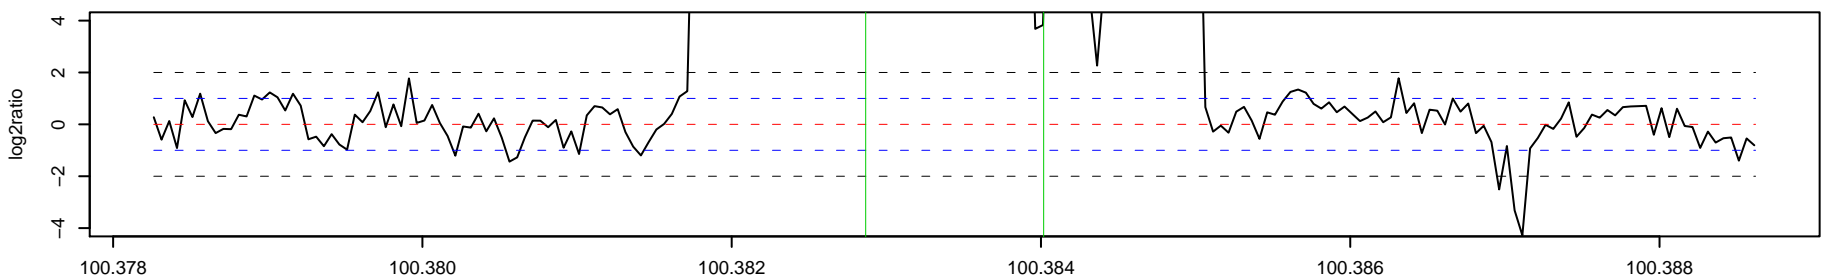

149\_AK1 Chr 3 : 100880071 - 100880524 , 454 bp (aCGH relative log2ratio= 0.34 )

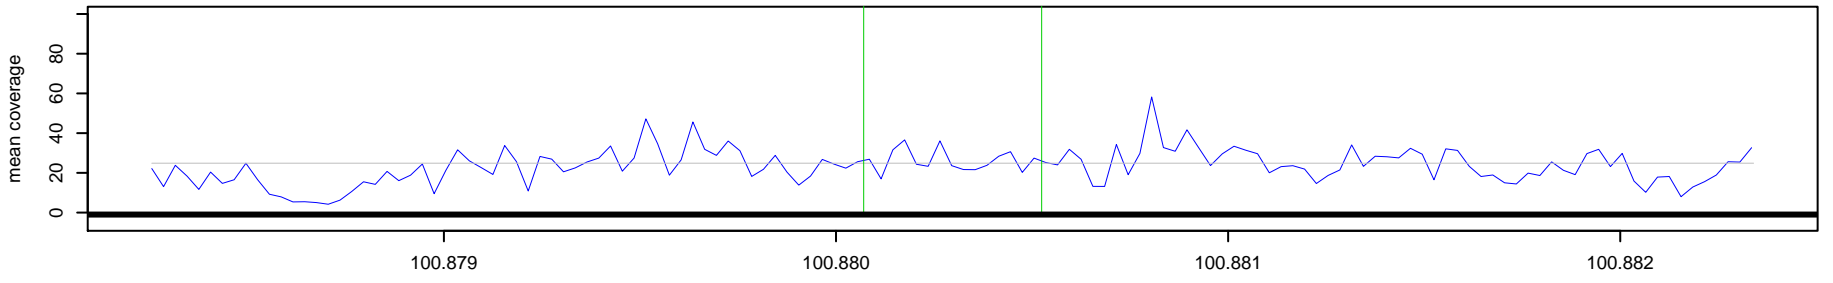

149\_NA10851 Chr 3 : 100880071 - 100880524 , 454 bp (aCGH relative log2ratio= 0.34 )

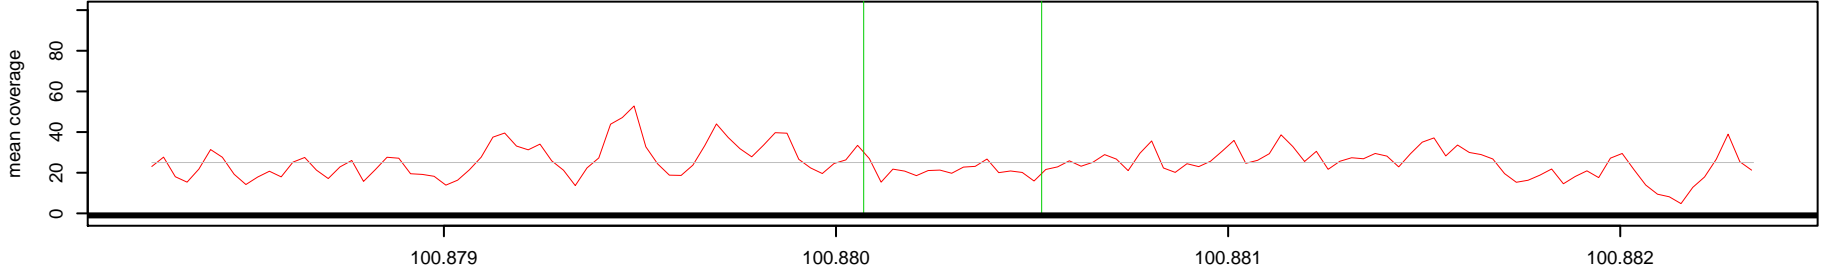

Log2( AK1 read depth / NA10851 read depth)

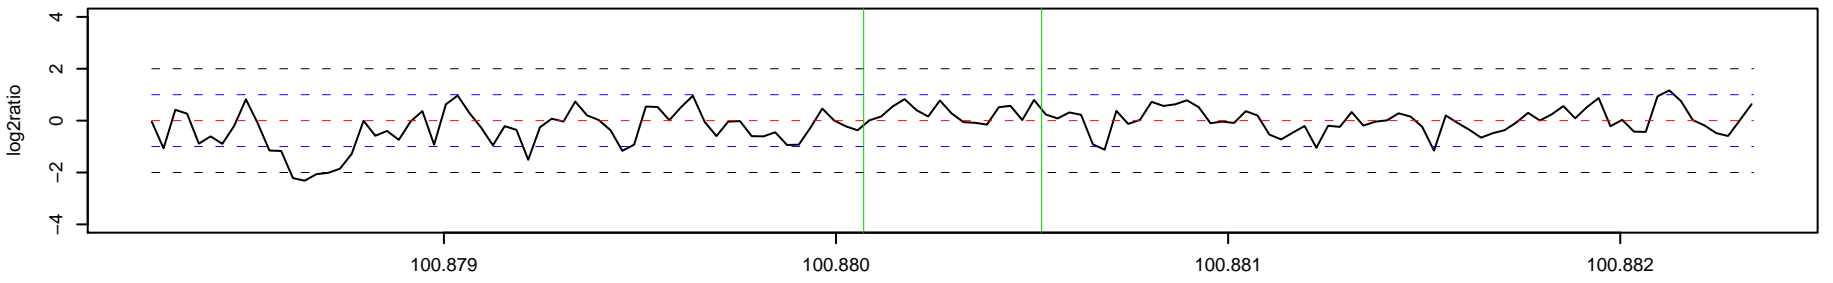

150\_AK1 Chr 3 : 105288647 - 105289190 , 544 bp (aCGH relative log2ratio= 0.60 )

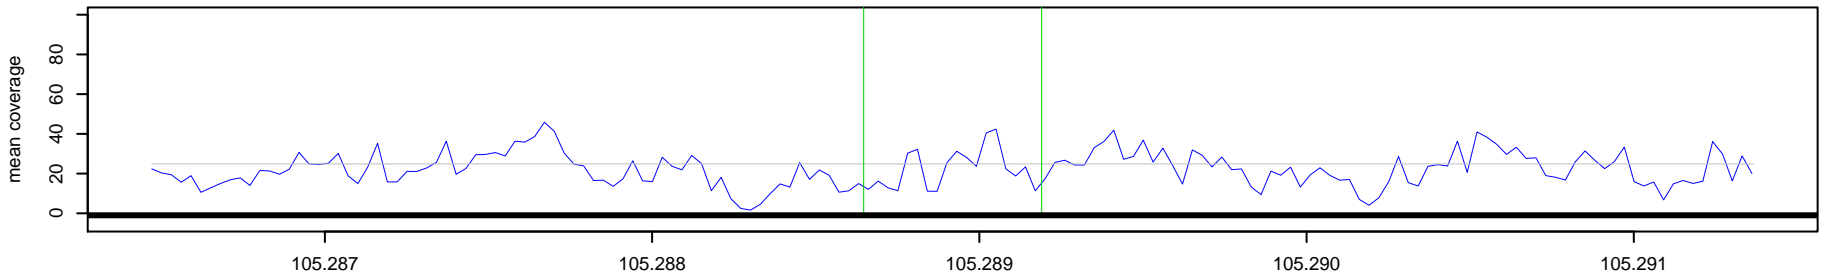

150\_NA10851 Chr 3 : 105288647 - 105289190 , 544 bp (aCGH relative log2ratio= 0.60 )

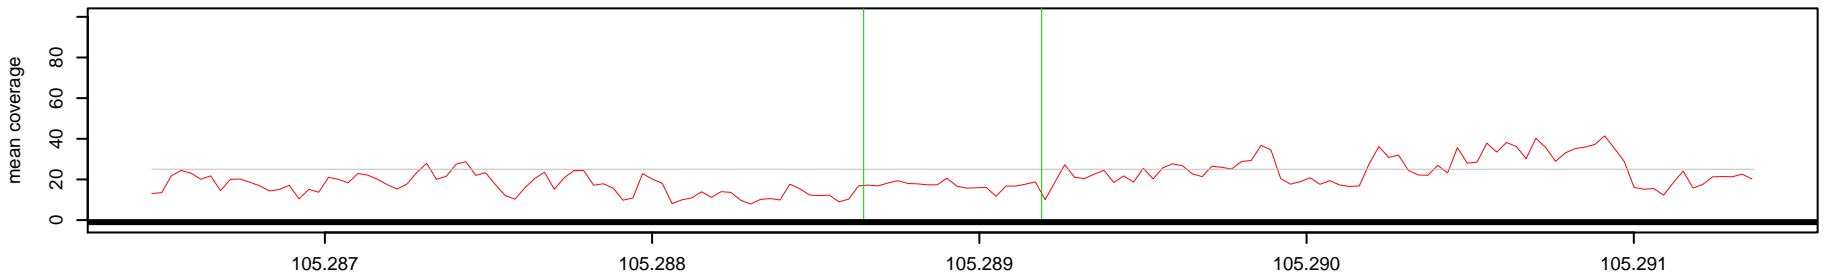

Log2( AK1 read depth / NA10851 read depth)

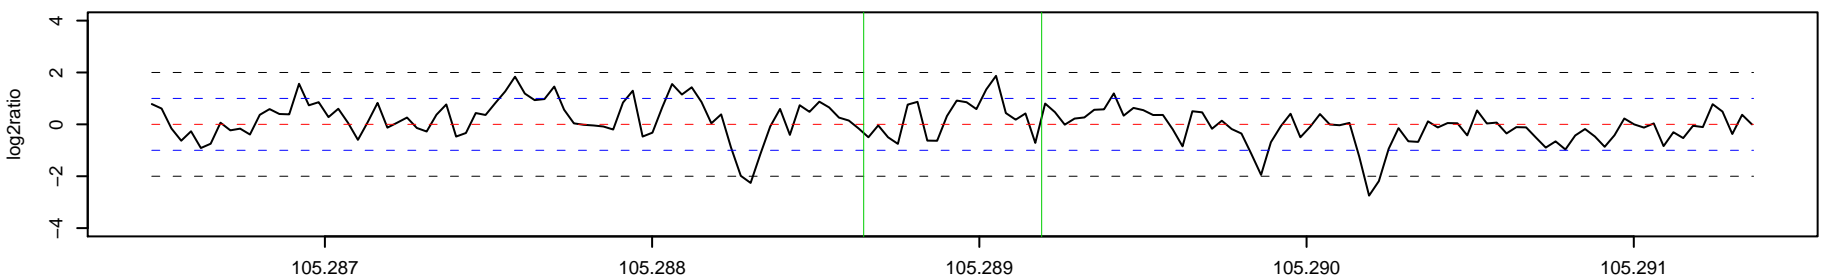

151 \_ AK1 Chr 3 : 126881351 – 126882599 , 1249 bp (aCGH relative log2ratio= 0.45 )

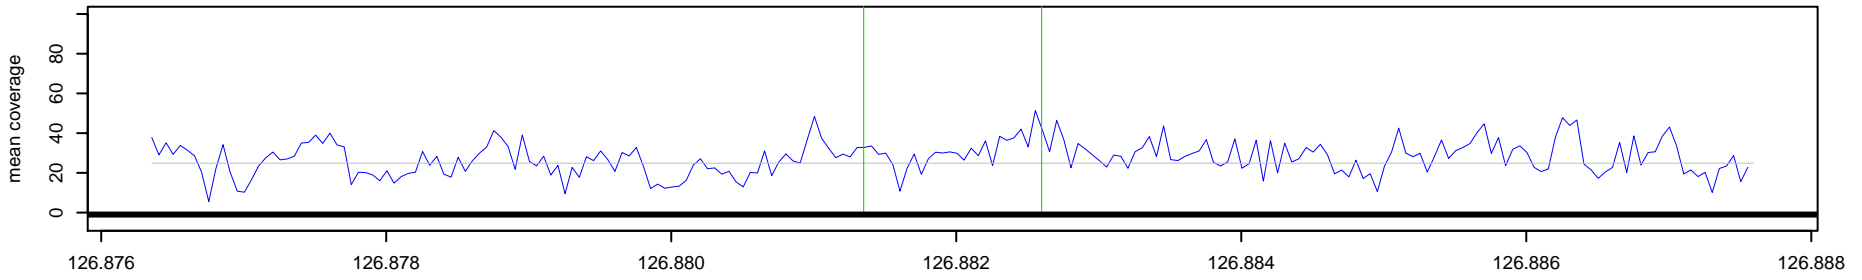

151 \_ NA10851 Chr 3 : 126881351 – 126882599 , 1249 bp (aCGH relative log2ratio= 0.45 )

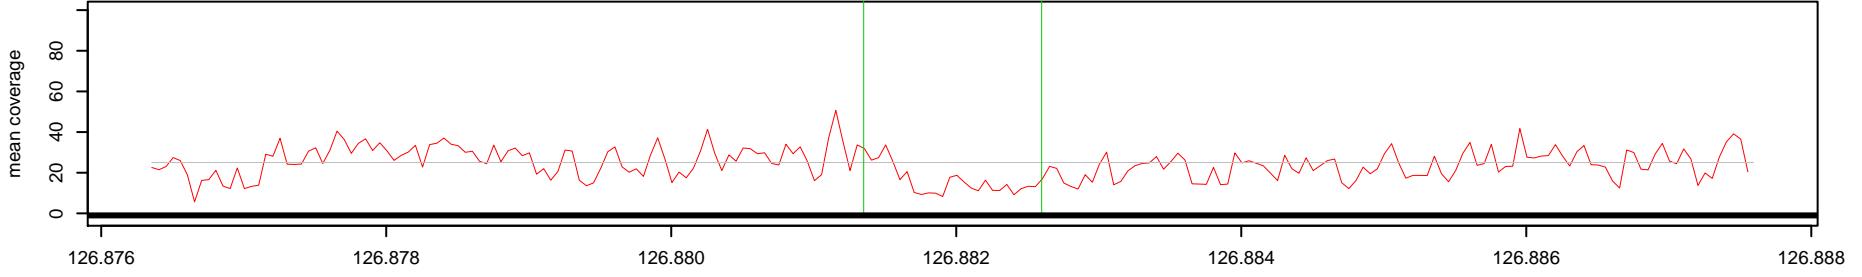

Log2( AK1 read depth / NA10851 read depth)

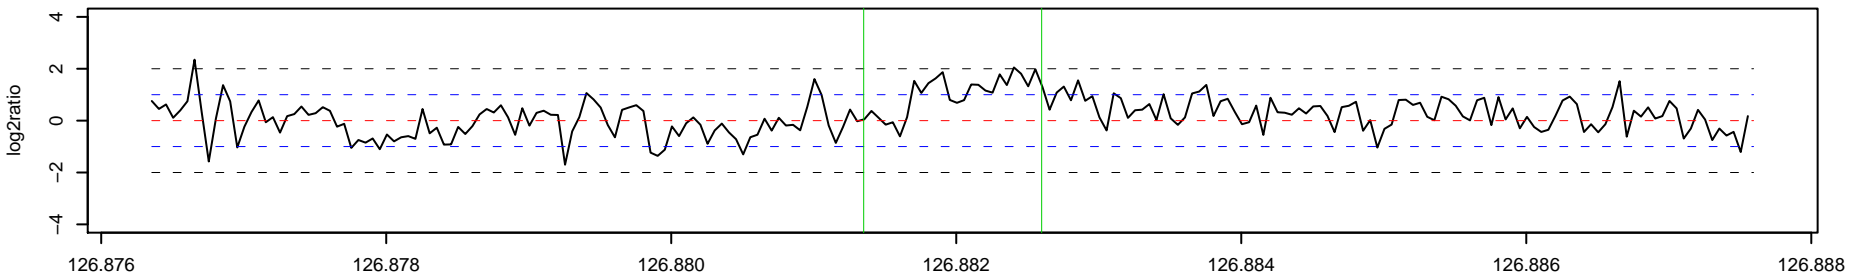

152 \_ AK1 Chr 3 : 130558875 – 130561742 , 2868 bp (aCGH relative log2ratio= -0.62 )

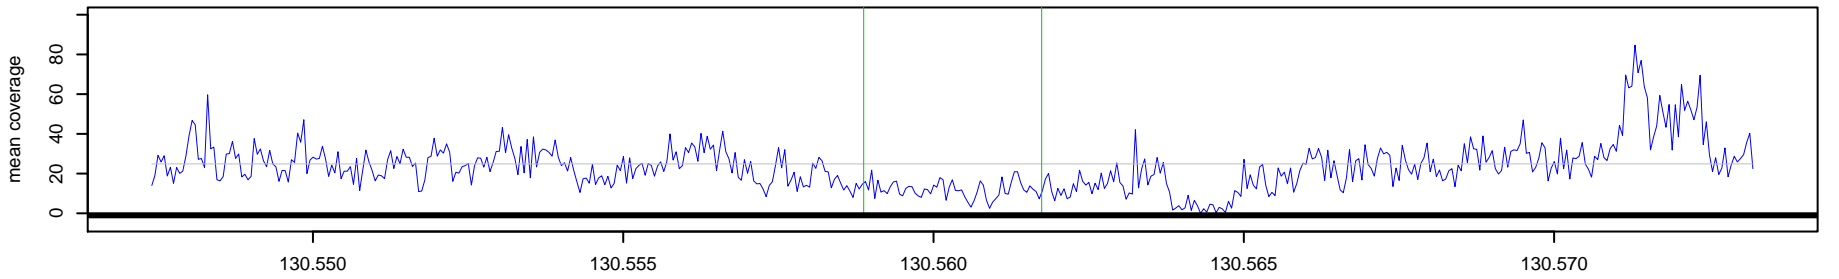

152 \_ NA10851 Chr 3 : 130558875 – 130561742 , 2868 bp (aCGH relative log2ratio= -0.62 )

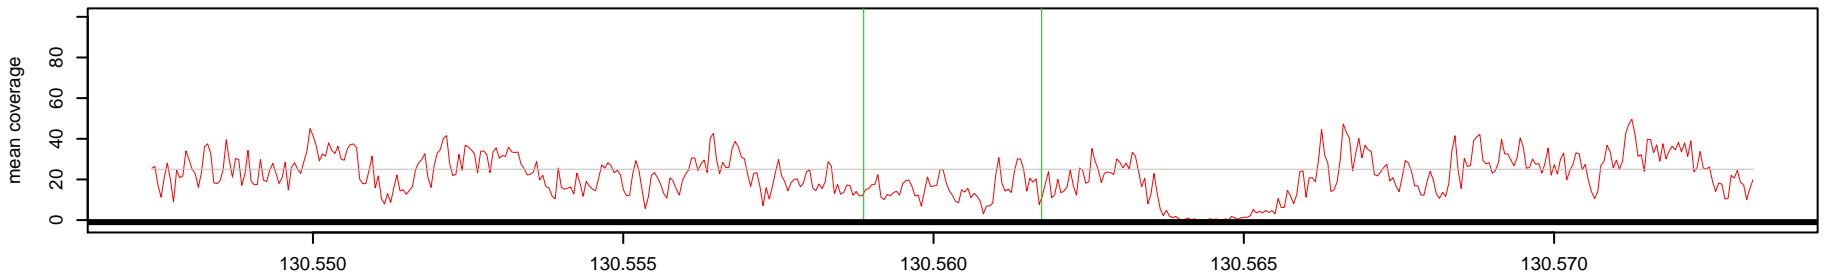

Log2( AK1 read depth / NA10851 read depth)

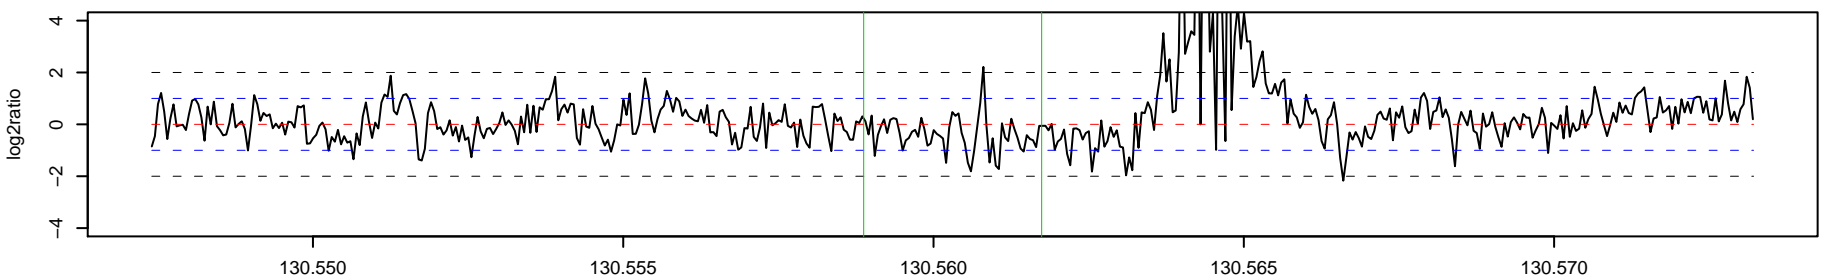



153 \_ AK1 Chr 3 : 142027093 – 142029655 , 2563 bp (aCGH relative log2ratio= -2.47 )

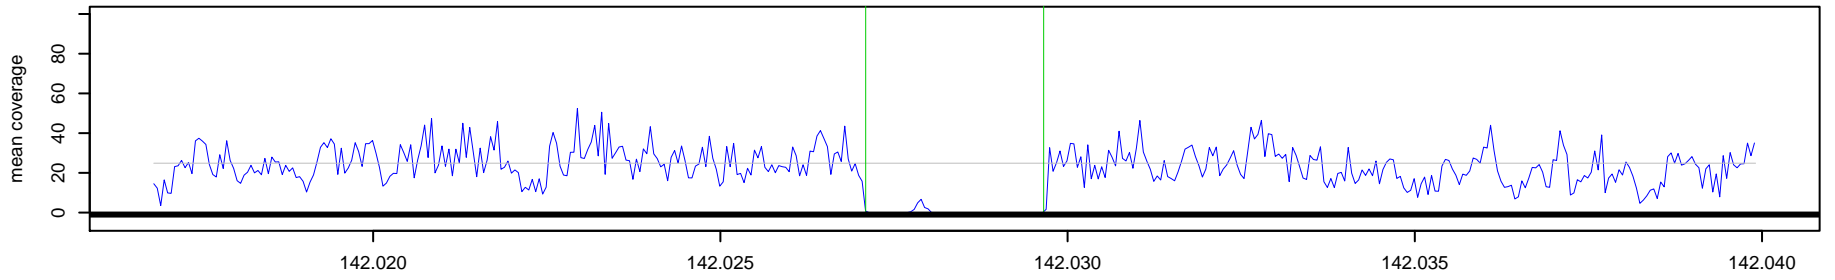

153 \_ NA10851 Chr 3 : 142027093 – 142029655 , 2563 bp (aCGH relative log2ratio= -2.47 )

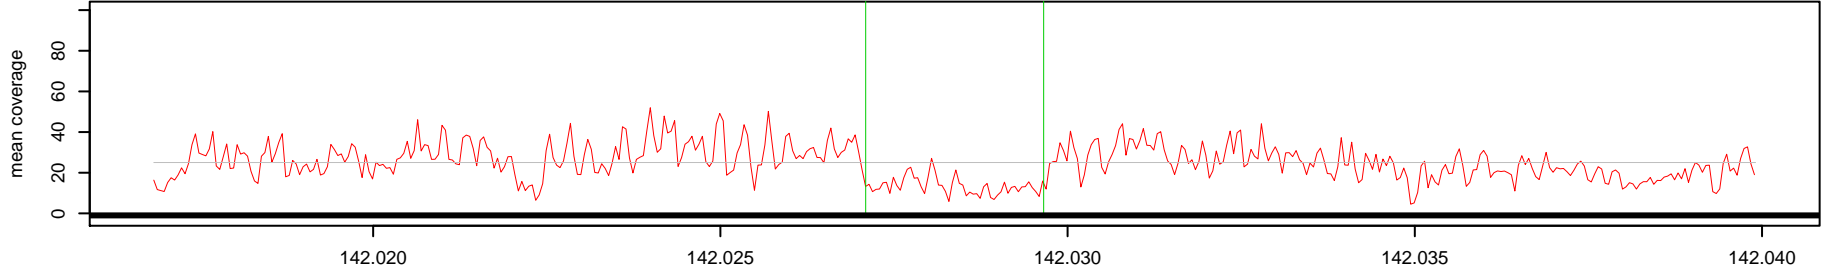

Log2( AK1 read depth / NA10851 read depth)

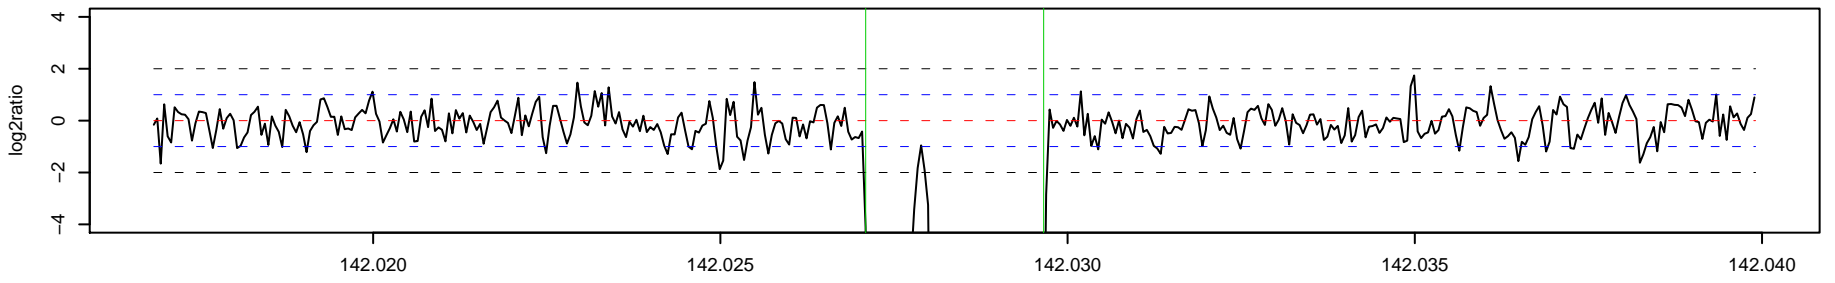

154 \_ AK1 Chr 3 : 150751196 – 150752764 , 1569 bp (aCGH relative log2ratio= -0.99 )

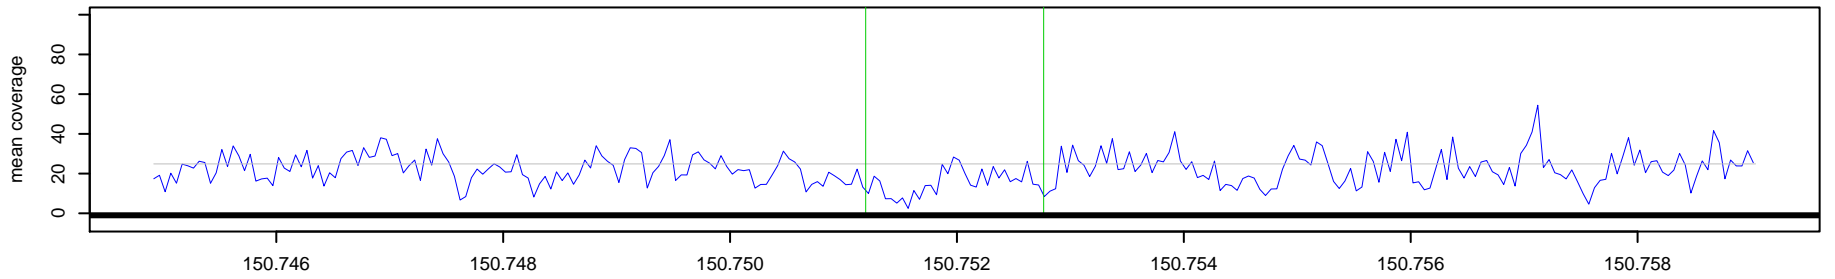

154 \_ NA10851 Chr 3 : 150751196 – 150752764 , 1569 bp (aCGH relative log2ratio= -0.99 )

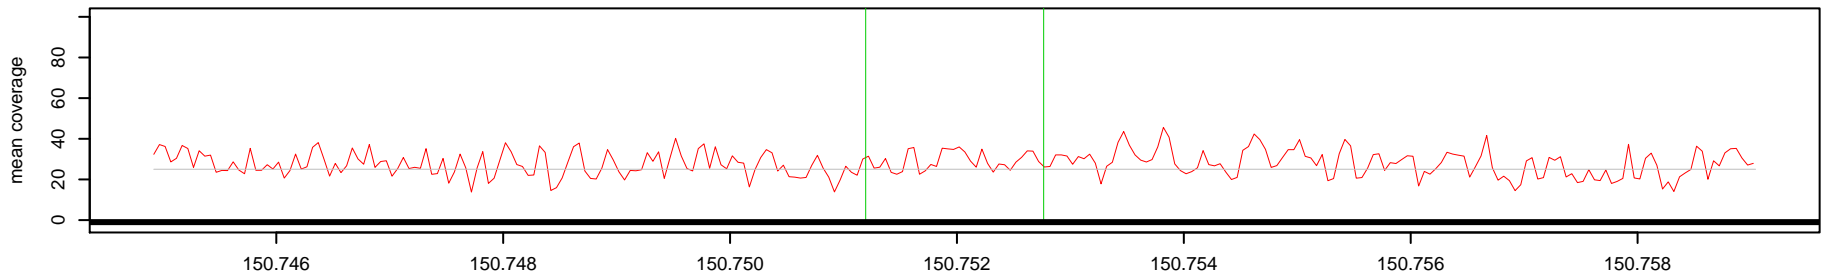

Log2( AK1 read depth / NA10851 read depth)

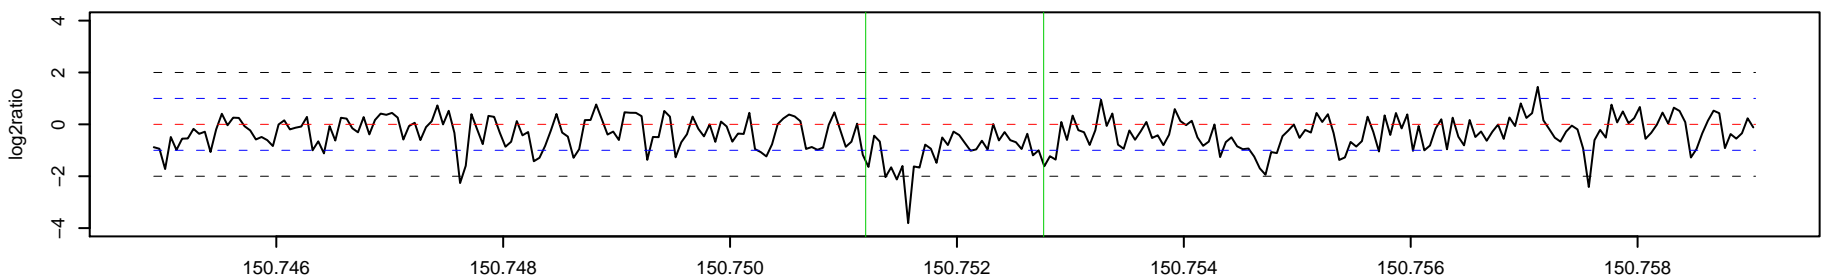

155 \_ AK1 Chr 3 : 160739672 – 160740346 , 675 bp (aCGH relative log2ratio= 2.70 )

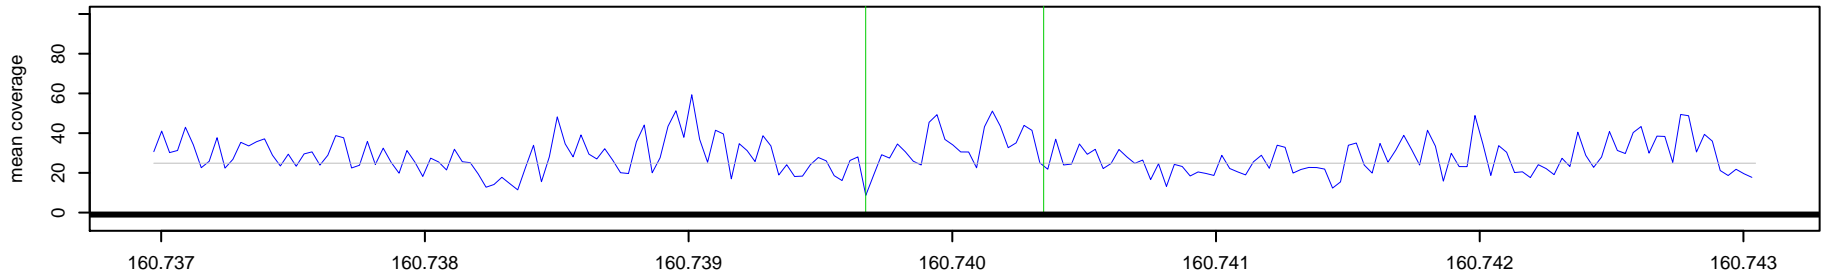

155 \_ NA10851 Chr 3 : 160739672 – 160740346 , 675 bp (aCGH relative log2ratio= 2.70 )

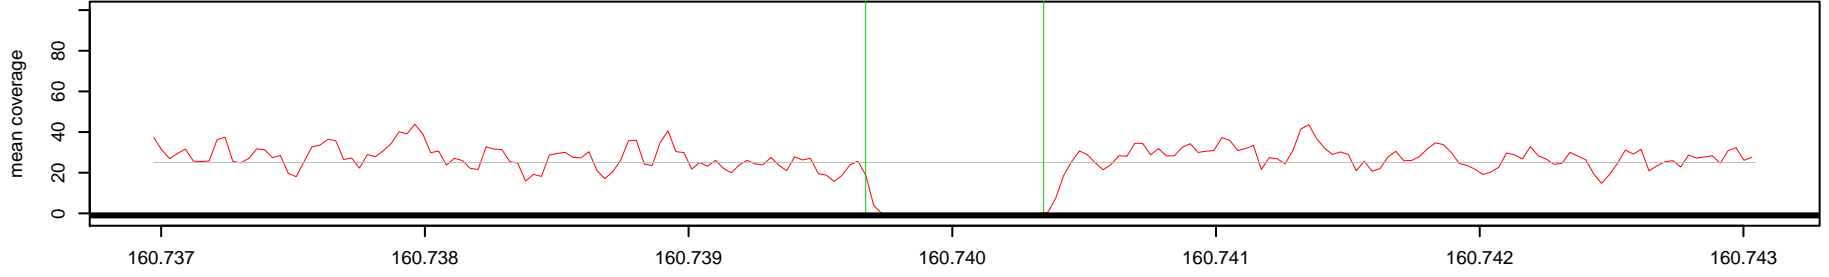

Log2( AK1 read depth / NA10851 read depth)

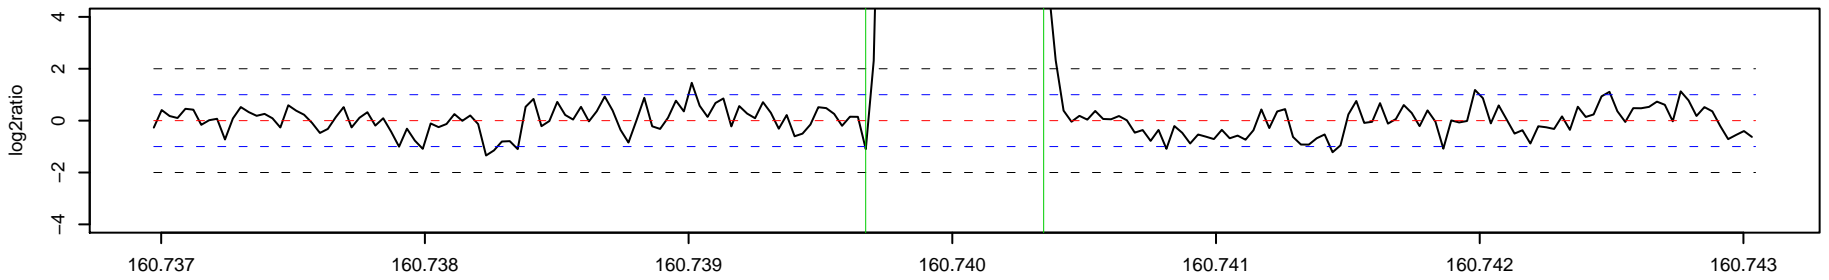

o

o

156 \_ AK1 Chr 3 : 164200000 – 164205055 , 5056 bp (aCGH relative log2ratio= -3.13 )

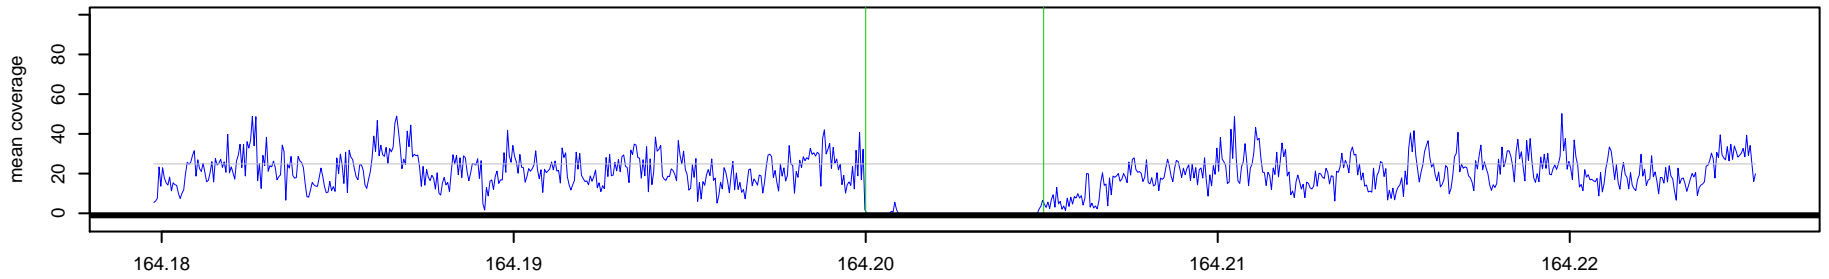

156 \_ NA10851 Chr 3 : 164200000 – 164205055 , 5056 bp (aCGH relative log2ratio= -3.13 )

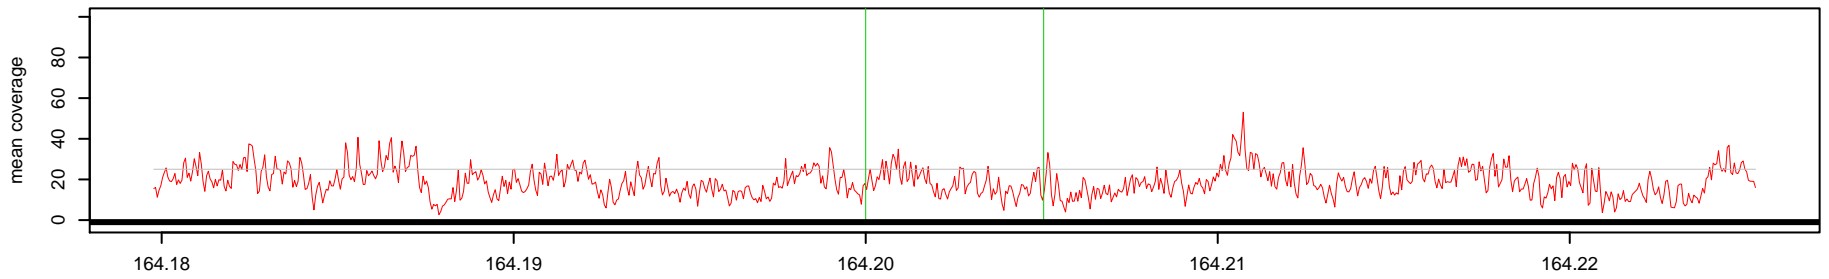

Log2( AK1 read depth / NA10851 read depth)

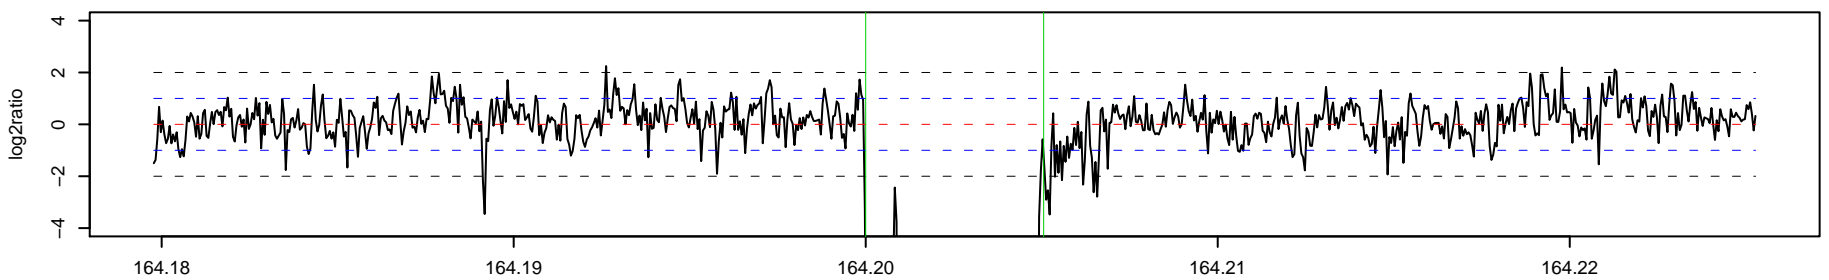

157\_AK1 Chr 3 : 165698755 – 165699466 , 712 bp (aCGH relative log2ratio= 0.54 )

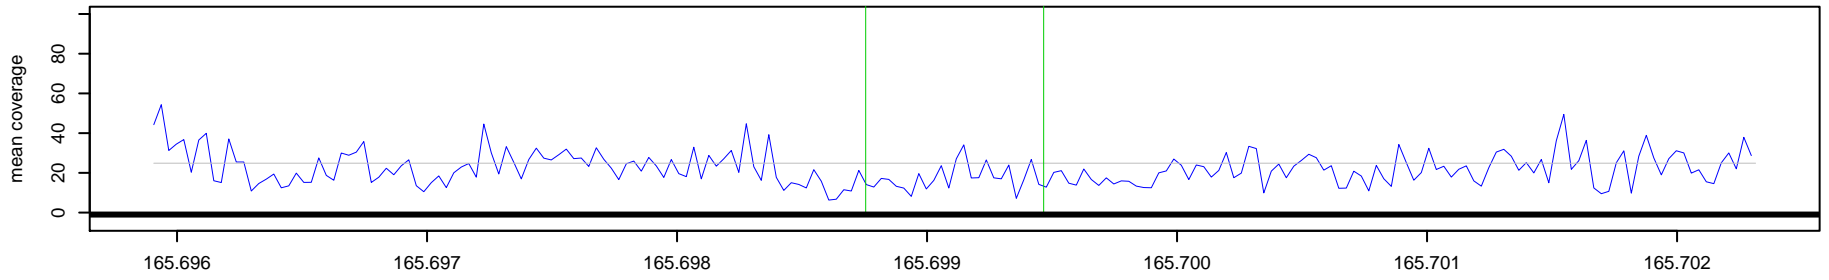

157\_NA10851 Chr 3 : 165698755 – 165699466 , 712 bp (aCGH relative log2ratio= 0.54 )

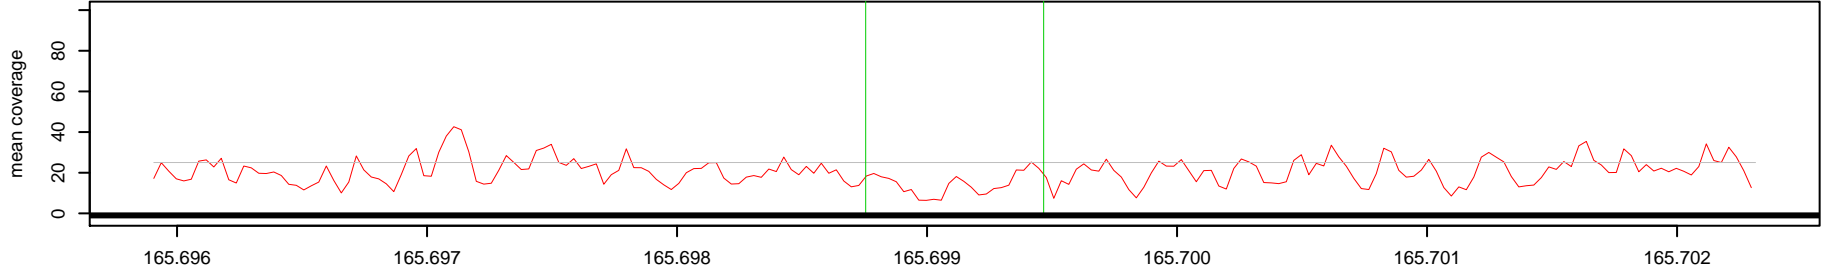

Log2( AK1 read depth / NA10851 read depth)

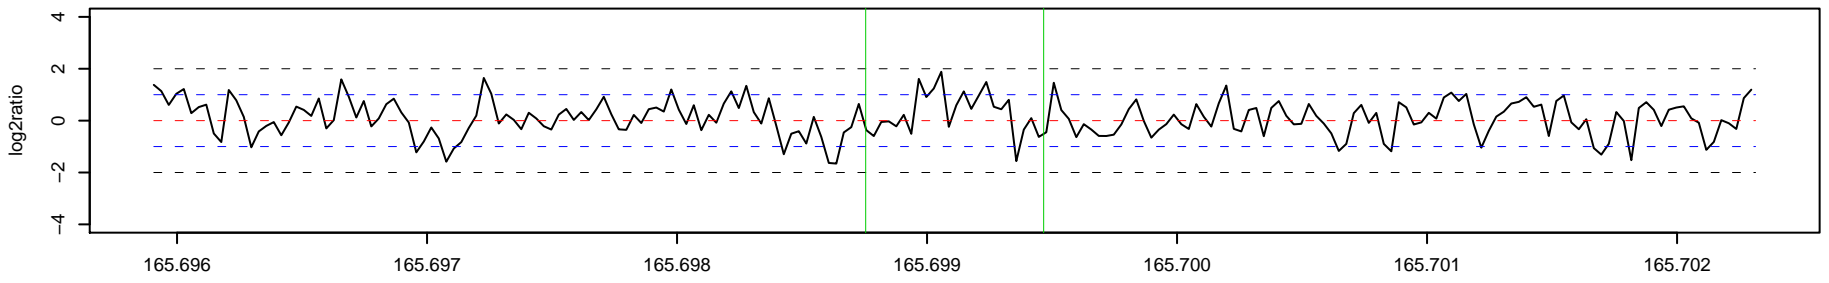

158\_AK1 Chr 3 : 171431546 – 171434346 , 2801 bp (aCGH relative log2ratio= -0.52 )

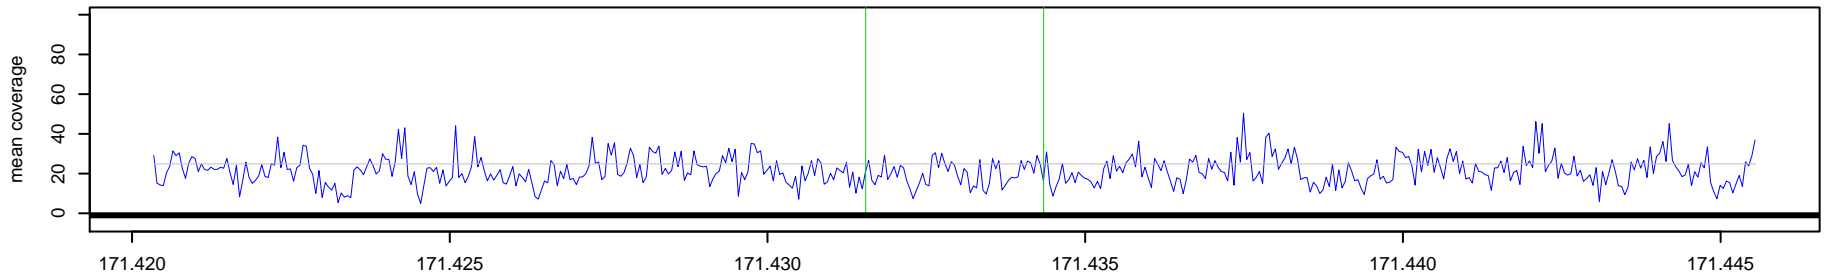

158\_NA10851 Chr 3 : 171431546 – 171434346 , 2801 bp (aCGH relative log2ratio= -0.52 )

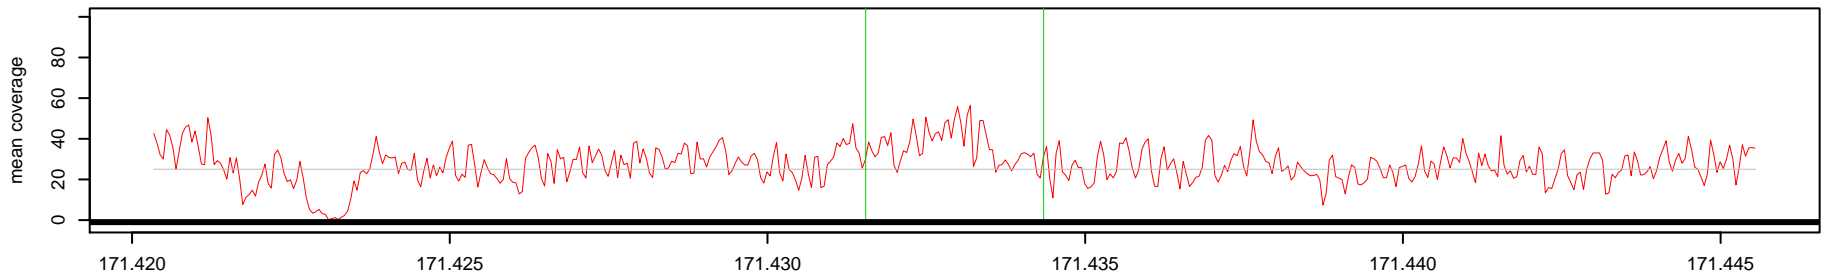

Log2( AK1 read depth / NA10851 read depth)

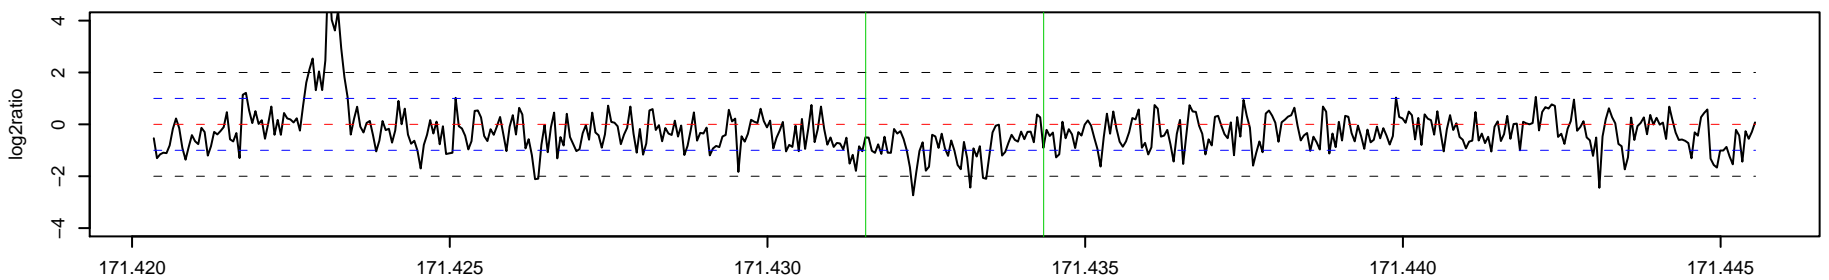

159\_AK1 Chr 3 : 180033083 – 180033522 , 440 bp (aCGH relative log2ratio= 3.64 )

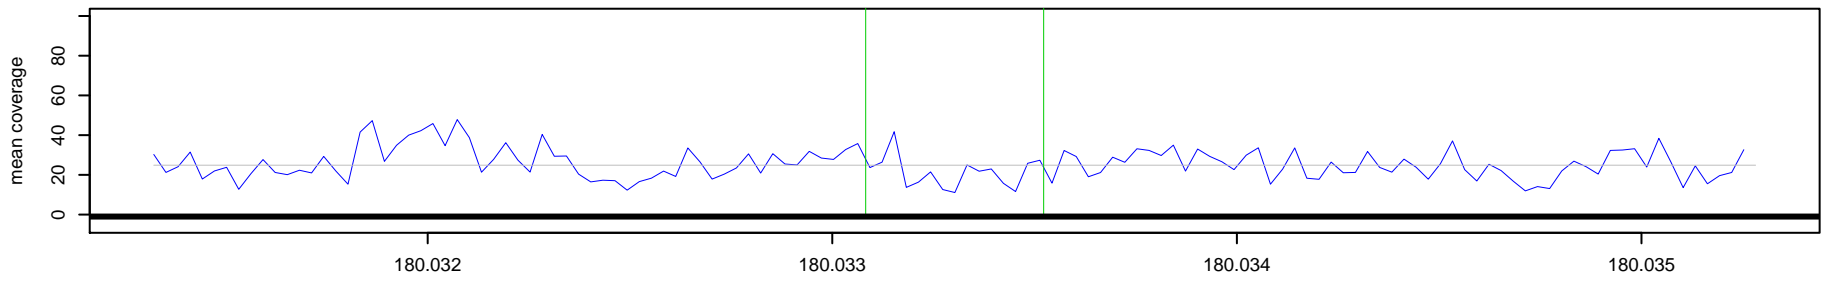

159\_NA10851 Chr 3 : 180033083 – 180033522 , 440 bp (aCGH relative log2ratio= 3.64 )

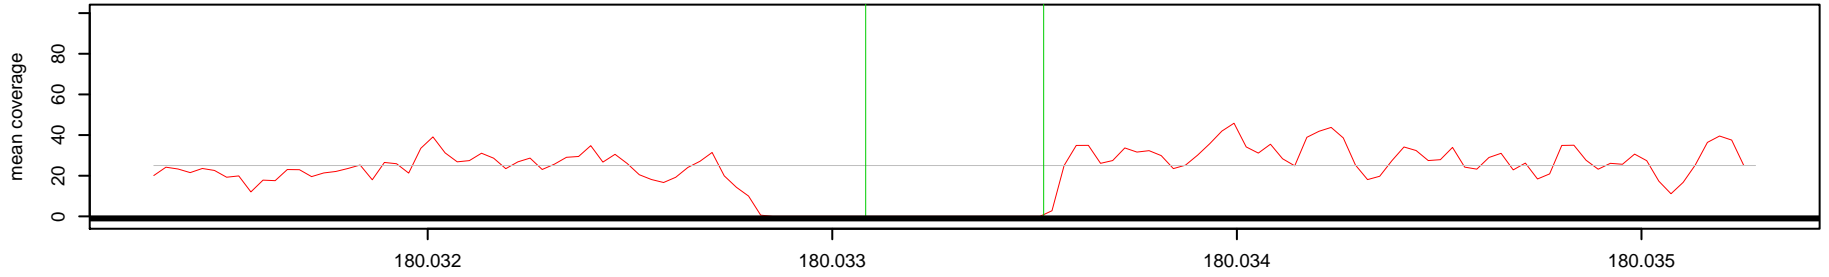

Log2( AK1 read depth / NA10851 read depth)

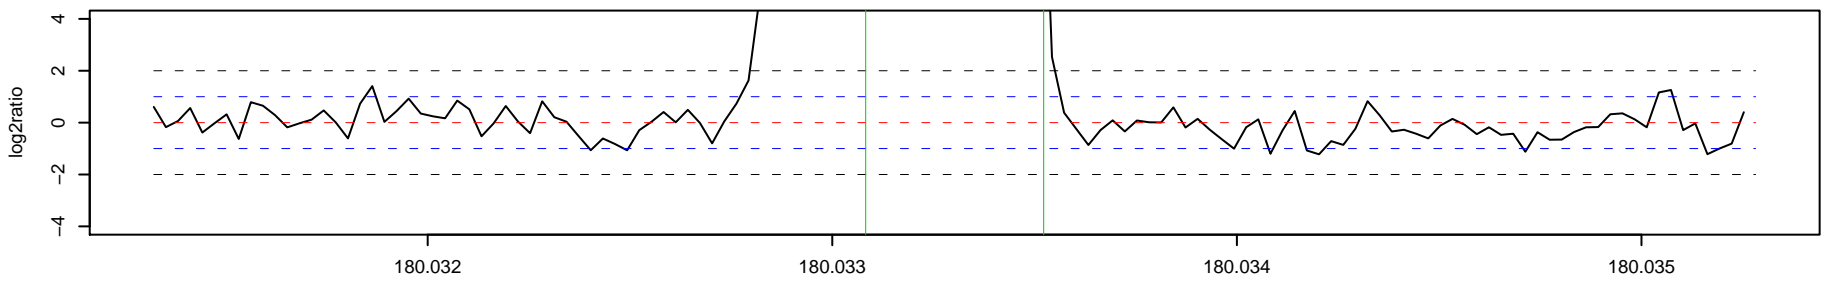

160\_AK1 Chr 3 : 190846546 – 190853621 , 7076 bp (aCGH relative log2ratio= -2.88 )

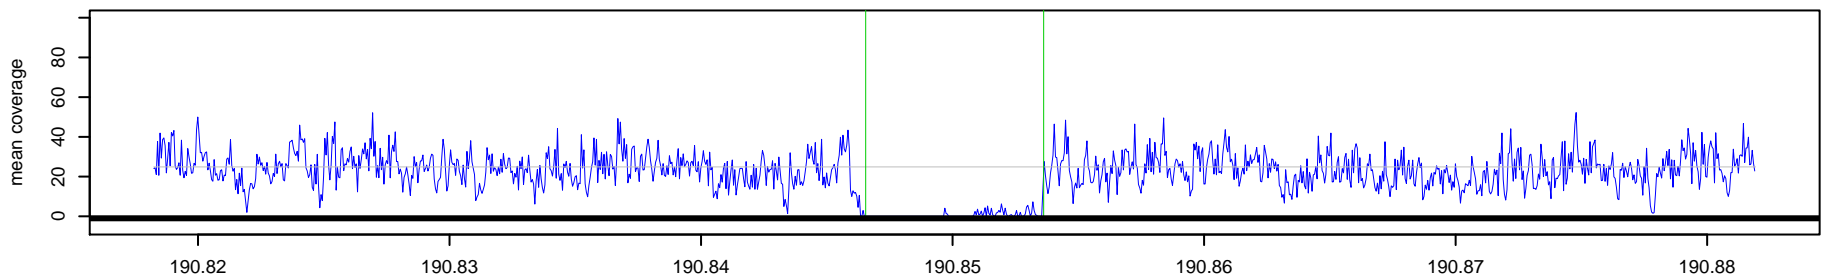

160\_NA10851 Chr 3 : 190846546 – 190853621 , 7076 bp (aCGH relative log2ratio= -2.88 )

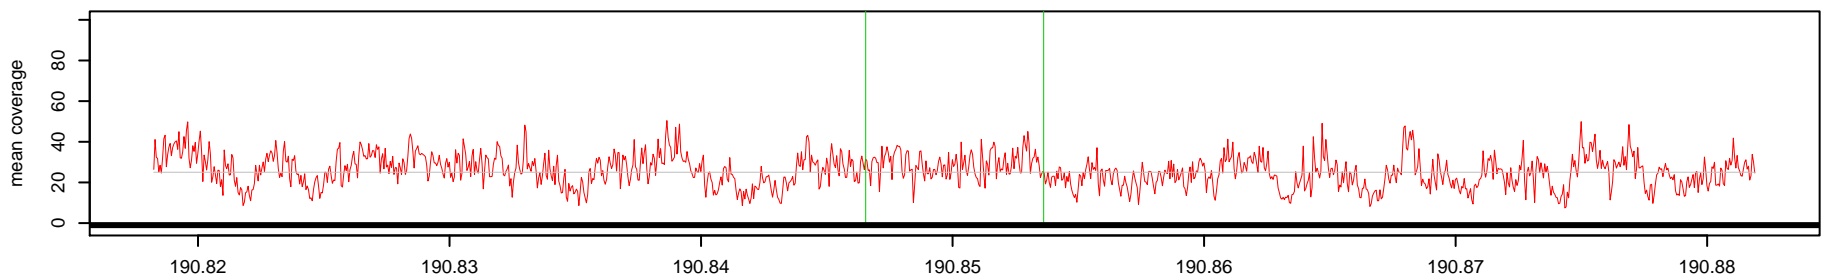

Log2( AK1 read depth / NA10851 read depth)

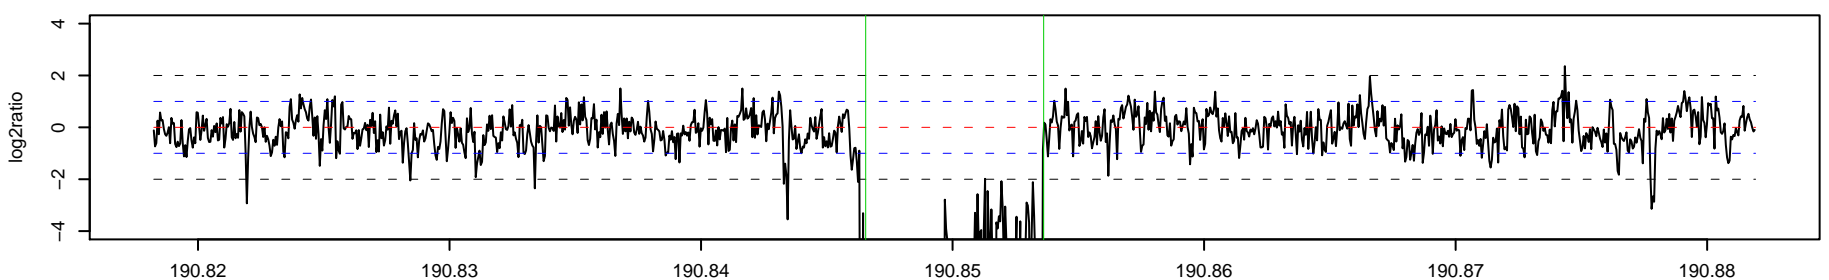

161 \_ AK1 Chr 3 : 19121993 – 191223230 , 3238 bp (aCGH relative log2ratio= 0.74 )

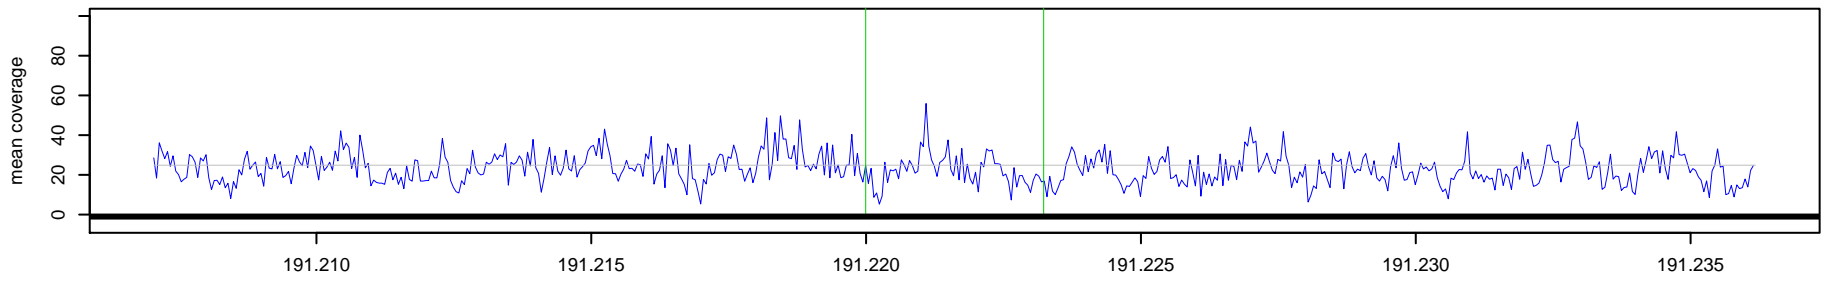

161 \_ NA10851 Chr 3 : 19121993 – 191223230 , 3238 bp (aCGH relative log2ratio= 0.74 )

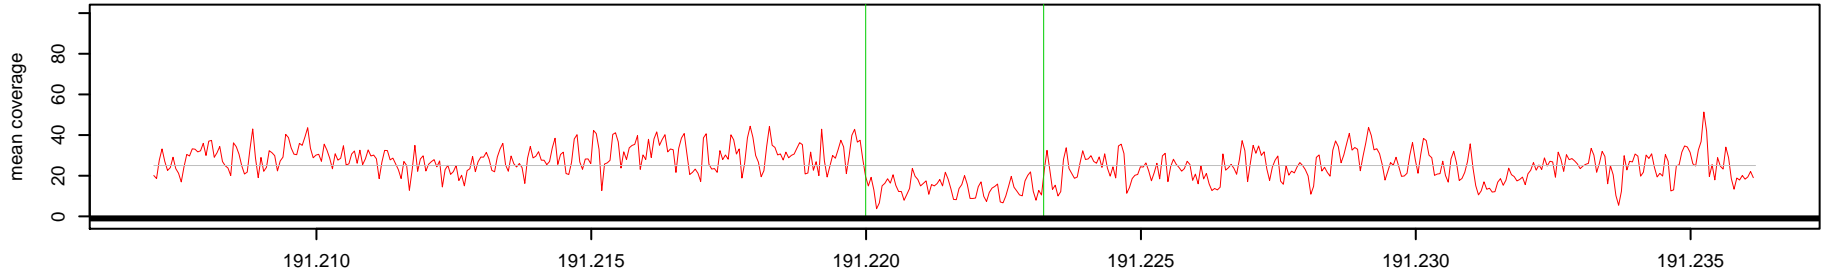

Log2( AK1 read depth / NA10851 read depth)

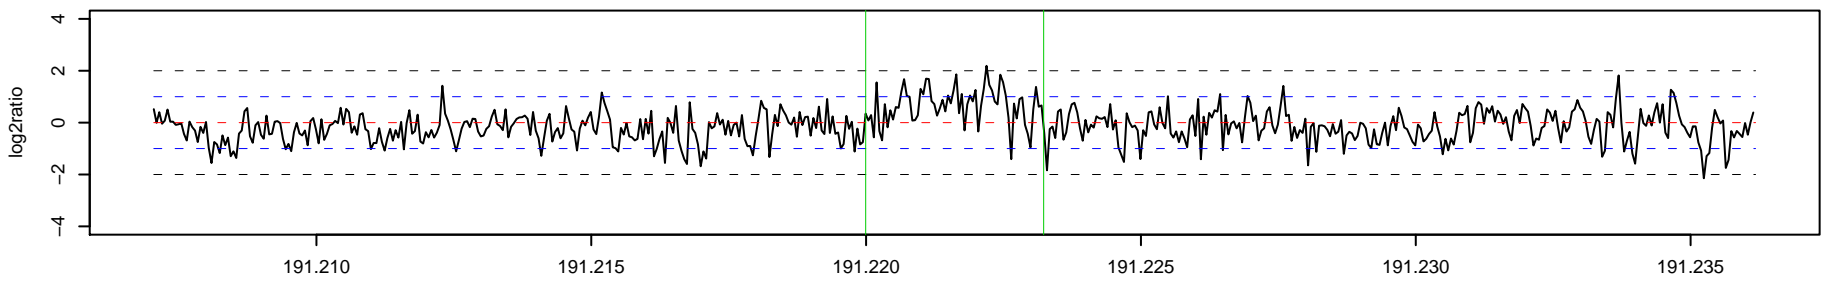

162 \_ AK1 Chr 3 : 192547366 – 192554343 , 6978 bp (aCGH relative log2ratio= 0.67 )

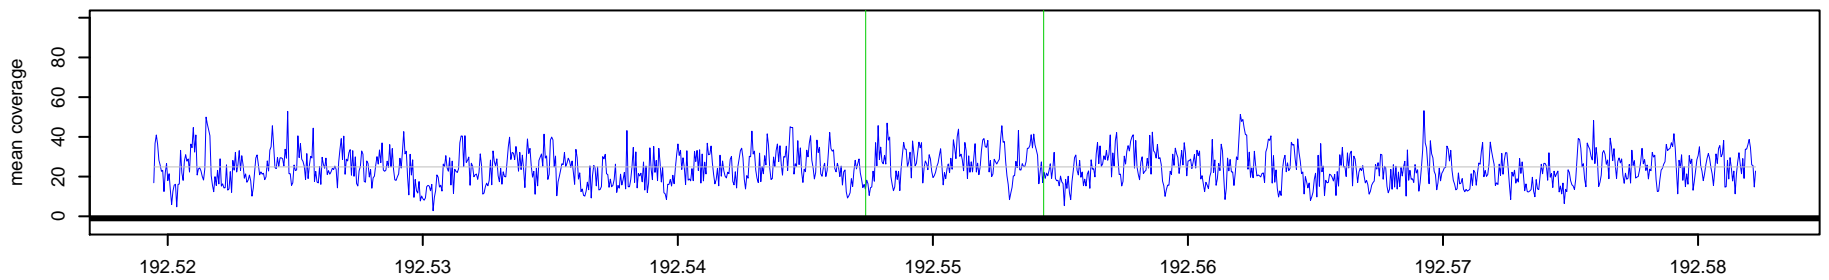

162 \_ NA10851 Chr 3 : 192547366 – 192554343 , 6978 bp (aCGH relative log2ratio= 0.67 )

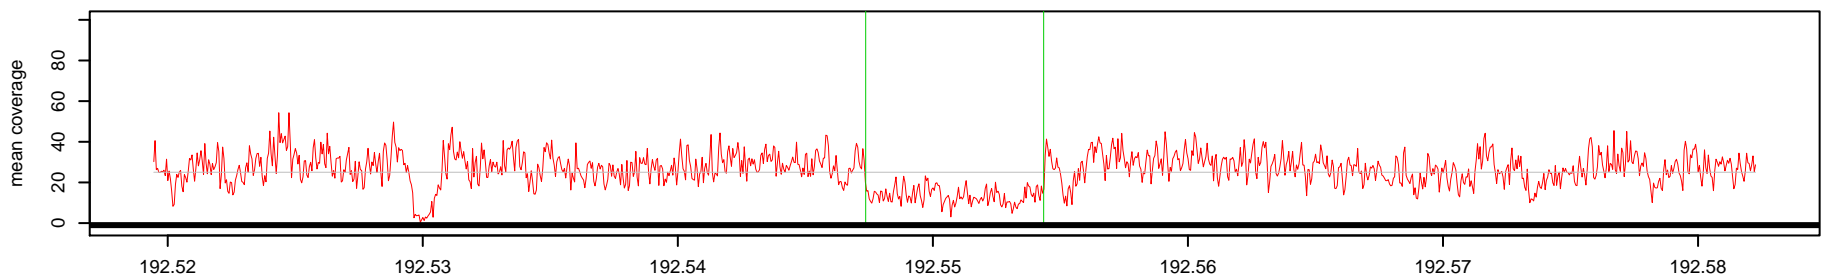

Log2( AK1 read depth / NA10851 read depth)

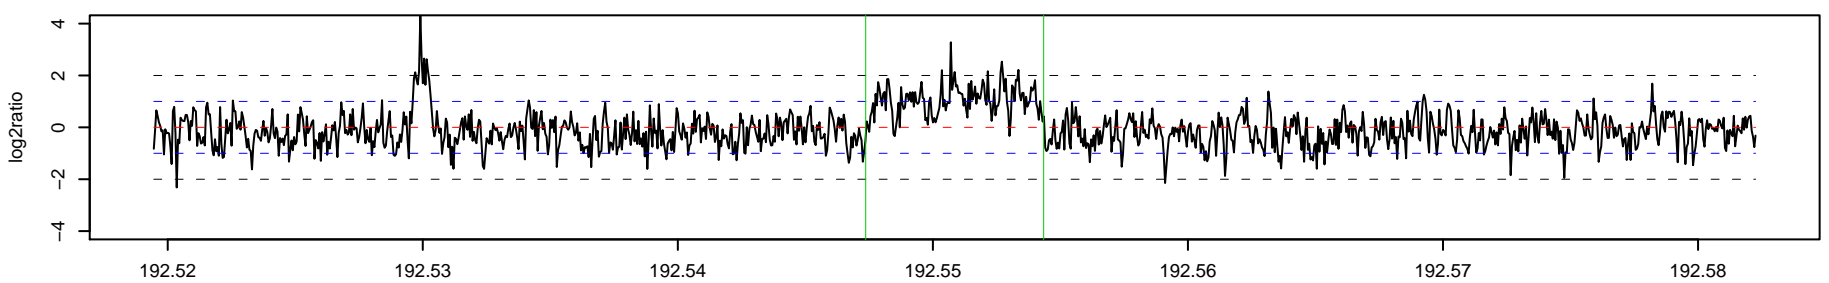

163 \_ AK1 Chr 3 : 193471238 – 193479293 , 8056 bp (aCGH relative log2ratio= 0.55 )

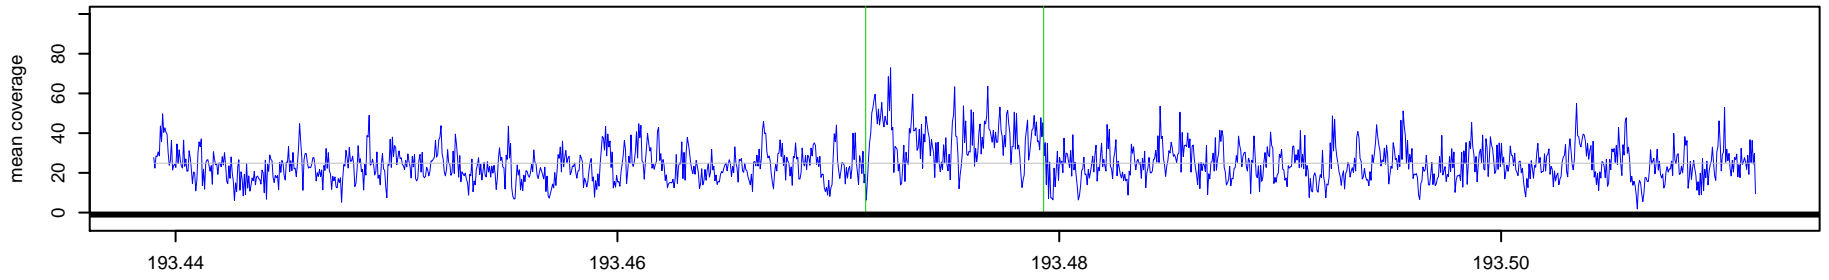

163 \_ NA10851 Chr 3 : 193471238 – 193479293 , 8056 bp (aCGH relative log2ratio= 0.55 )

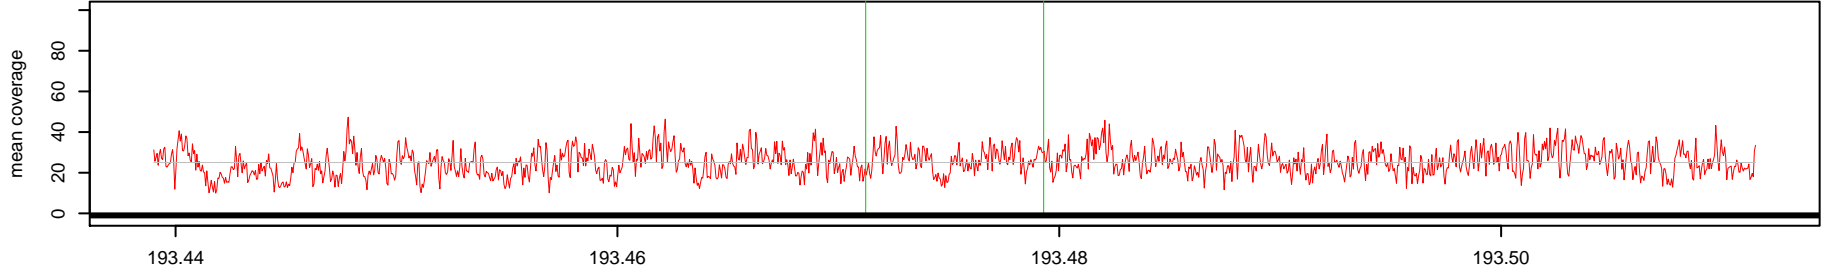

Log2( AK1 read depth / NA10851 read depth)

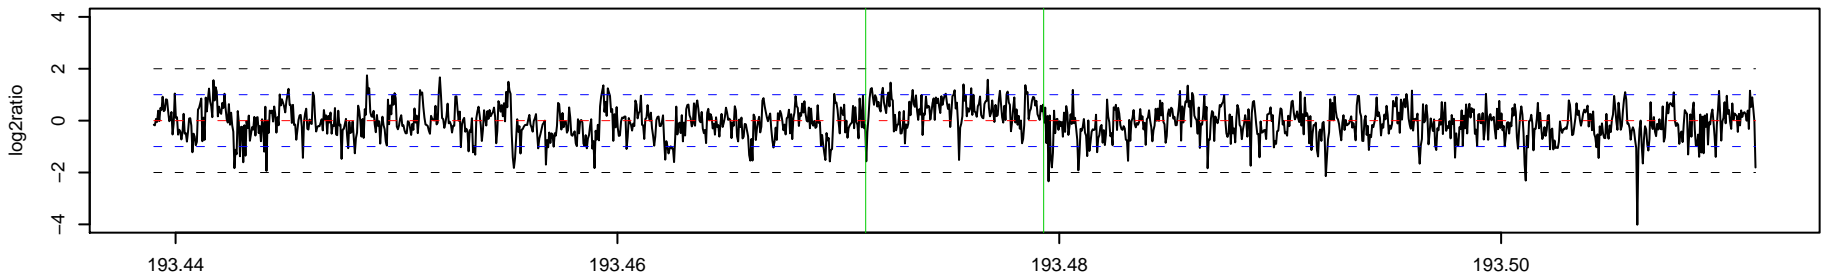

164 \_ AK1 Chr 3 : 194357946 – 194368103 , 10158 bp (aCGH relative log2ratio= 2.02 )

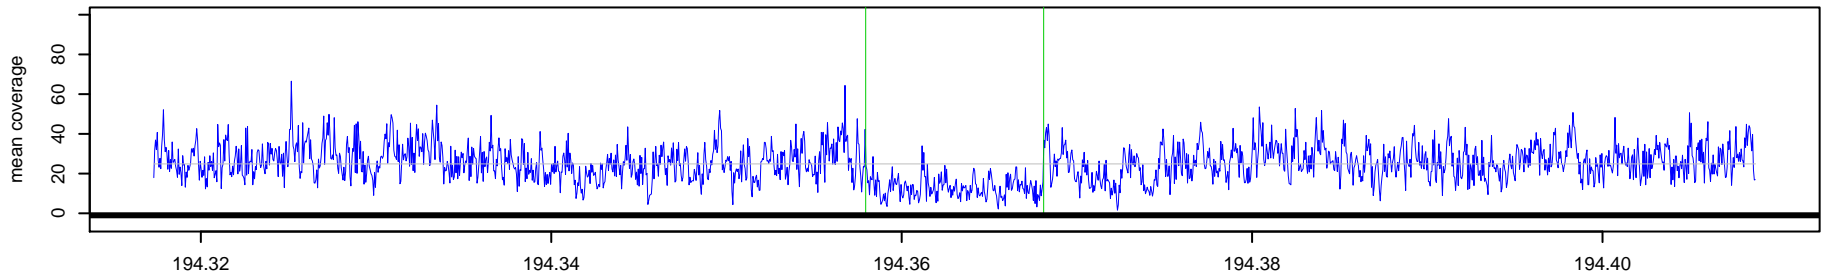

164 \_ NA10851 Chr 3 : 194357946 – 194368103 , 10158 bp (aCGH relative log2ratio= 2.02 )

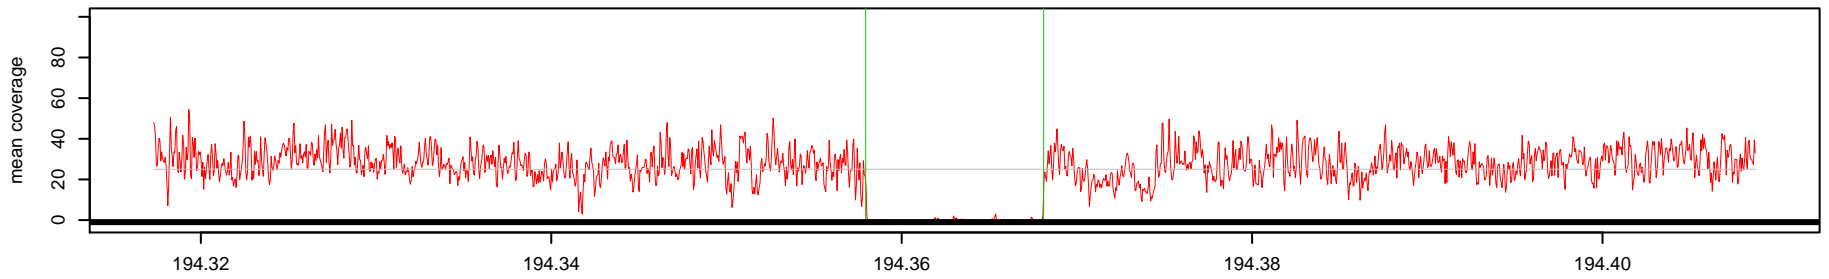

Log2( AK1 read depth / NA10851 read depth)

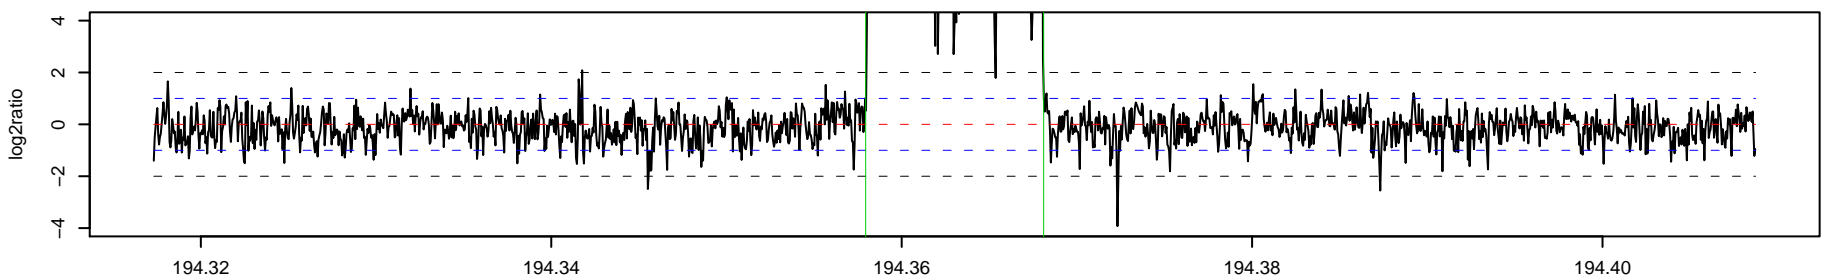

165\_AK1 Chr 3 : 196267304 – 196268927 , 1624 bp (aCGH relative log2ratio= -1.01 )

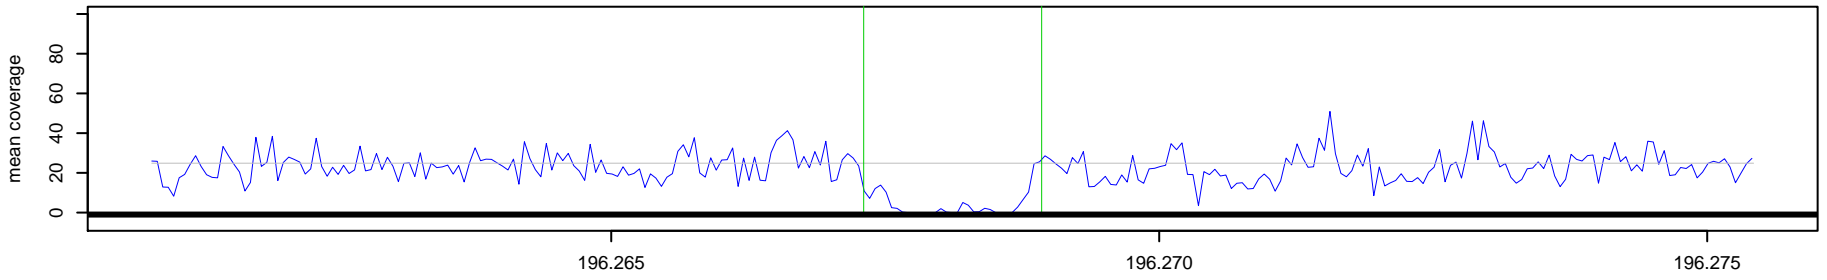

165\_NA10851 Chr 3 : 196267304 – 196268927 , 1624 bp (aCGH relative log2ratio= -1.01 )

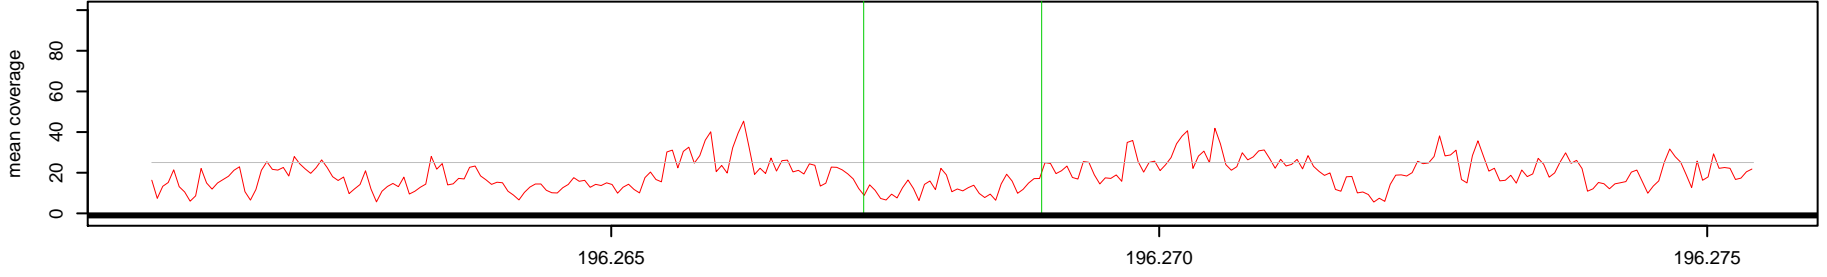

Log2( AK1 read depth / NA10851 read depth)

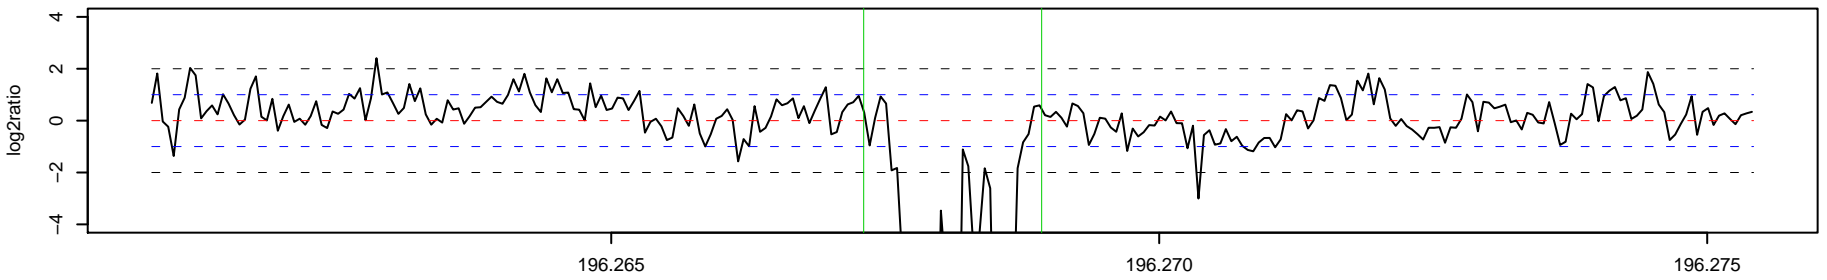

166\_AK1 Chr 3 : 196822698 – 196942213 , 119516 bp (aCGH relative log2ratio= 0.30 )

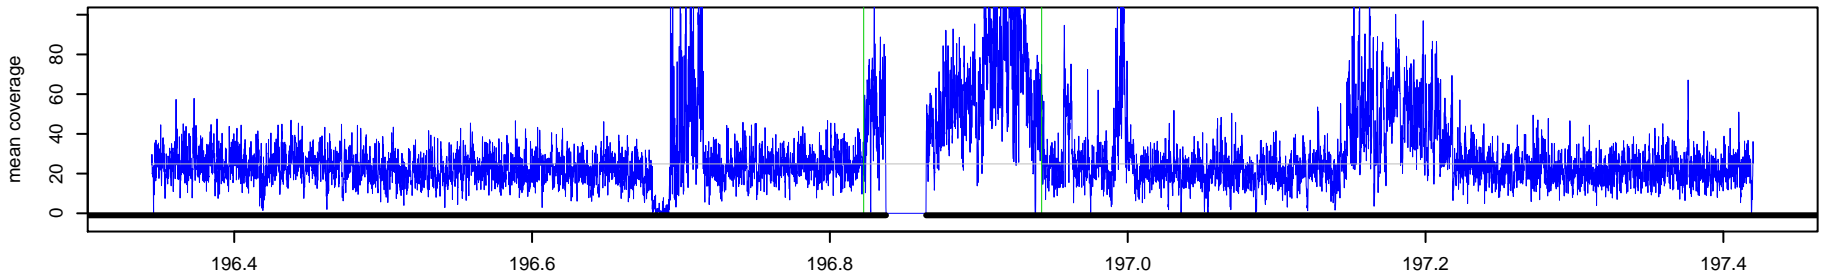

166\_NA10851 Chr 3 : 196822698 – 196942213 , 119516 bp (aCGH relative log2ratio= 0.30 )

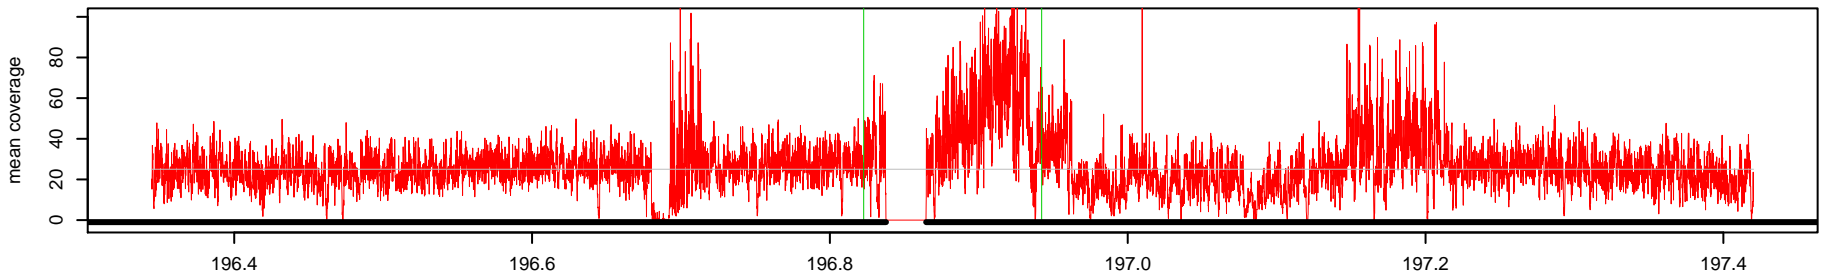

Log2( AK1 read depth / NA10851 read depth)

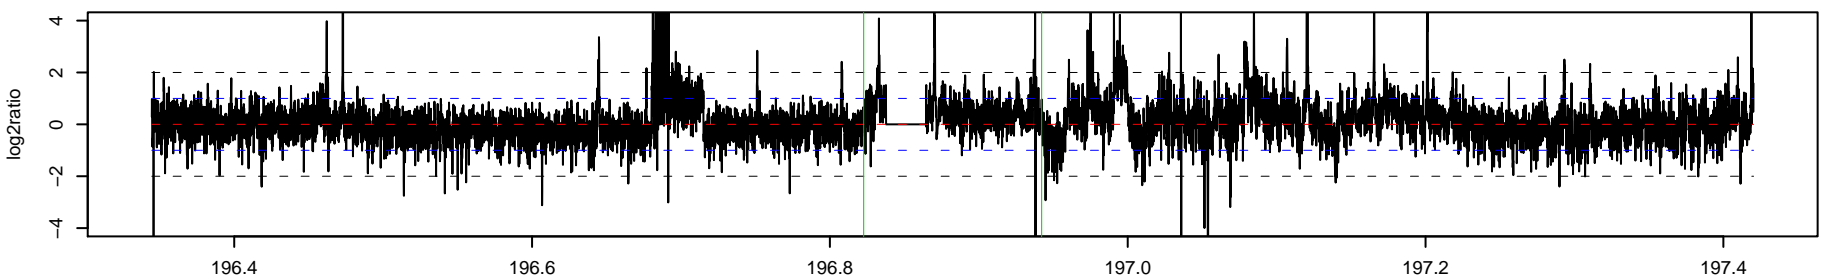

167 \_ AK1 Chr 3 : 196943002 – 196952714 , 9713 bp (aCGH relative log2ratio= -0.53 )

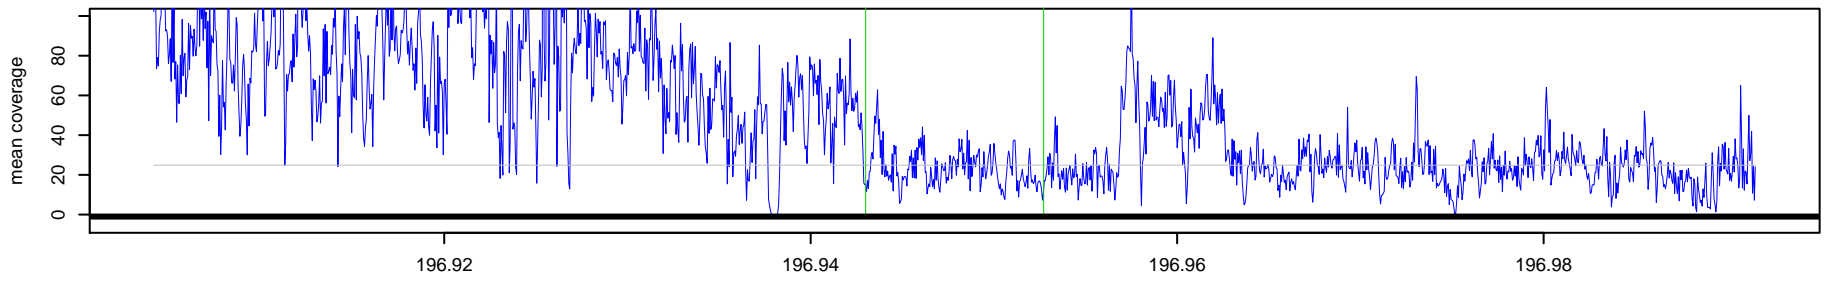

167 \_ NA10851 Chr 3 : 196943002 – 196952714 , 9713 bp (aCGH relative log2ratio= -0.53 )

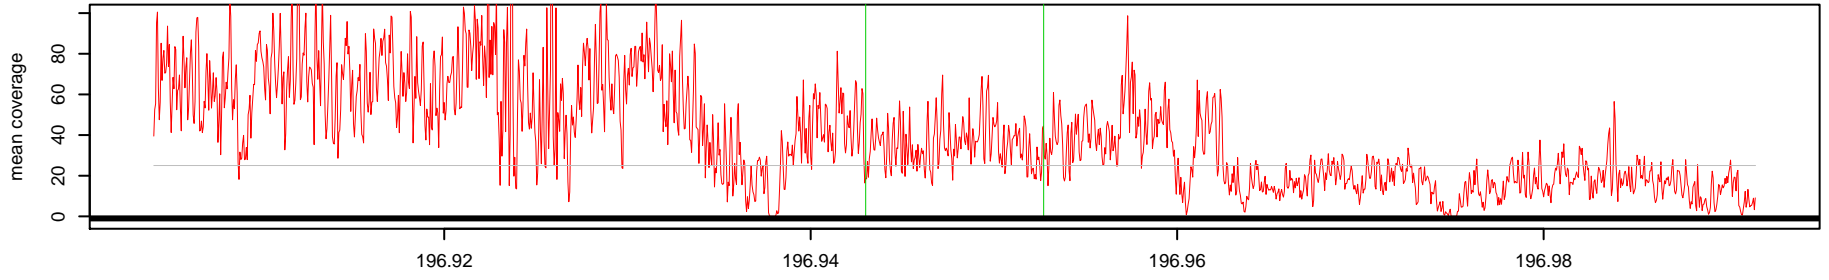

Log2( AK1 read depth / NA10851 read depth)

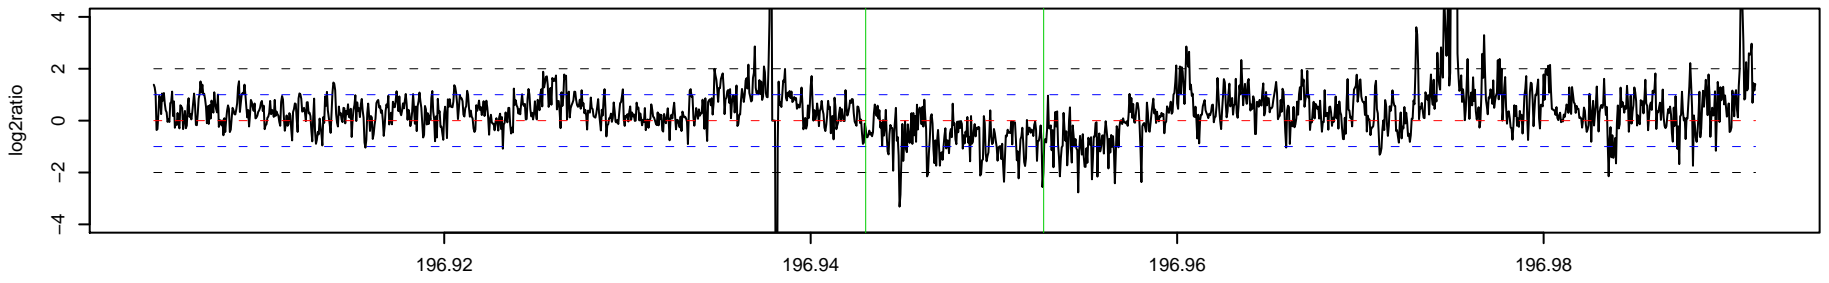

168 \_ AK1 Chr 3 : 197258387 – 197259160 , 774 bp (aCGH relative log2ratio= -1.05 )

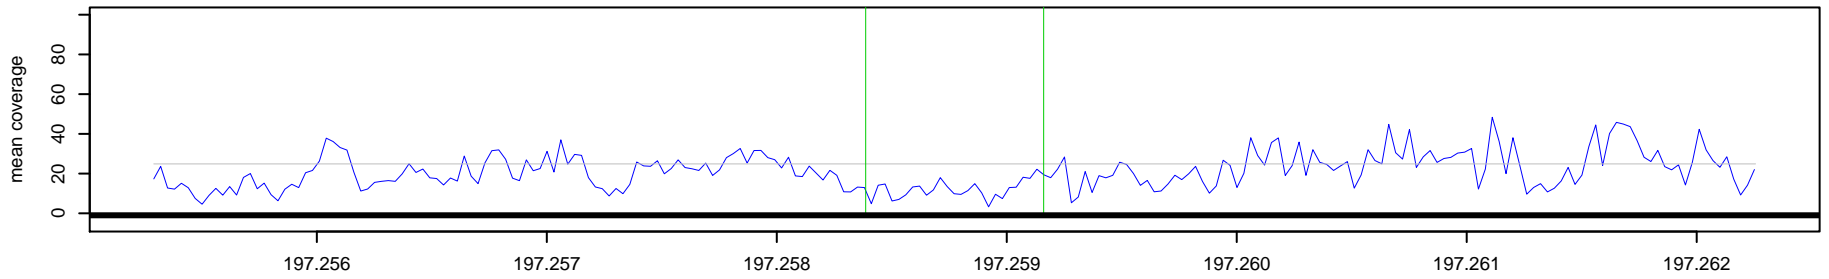

168 \_ NA10851 Chr 3 : 197258387 – 197259160 , 774 bp (aCGH relative log2ratio= -1.05 )

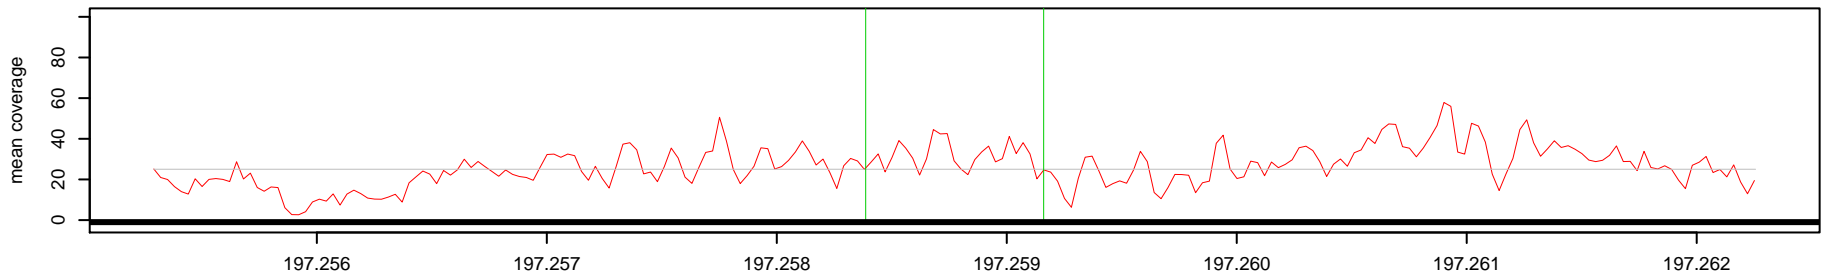

Log2( AK1 read depth / NA10851 read depth)

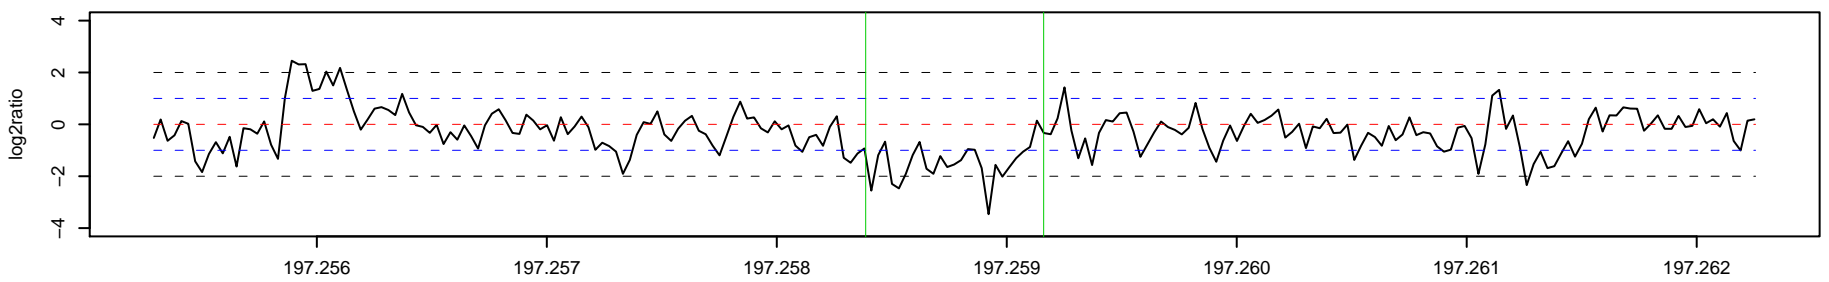



169\_AK1 Chr 3 : 198039563 – 198044027 , 4465 bp (aCGH relative log2ratio= 0.30 )

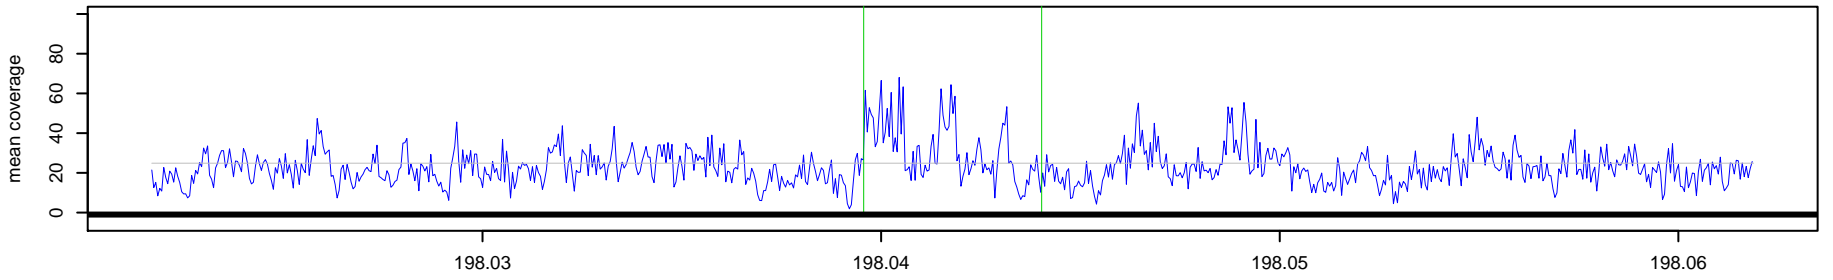

169\_NA10851 Chr 3 : 198039563 – 198044027 , 4465 bp (aCGH relative log2ratio= 0.30 )

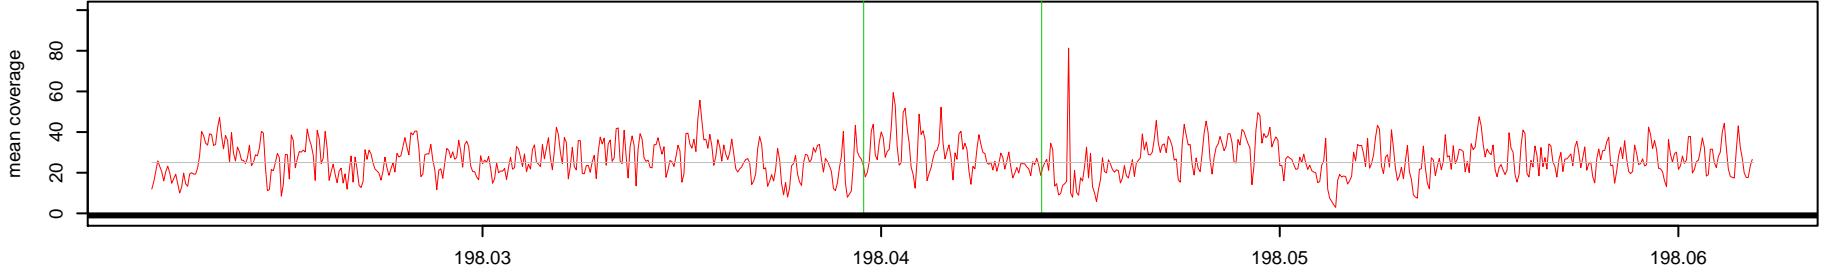

Log2( AK1 read depth / NA10851 read depth)

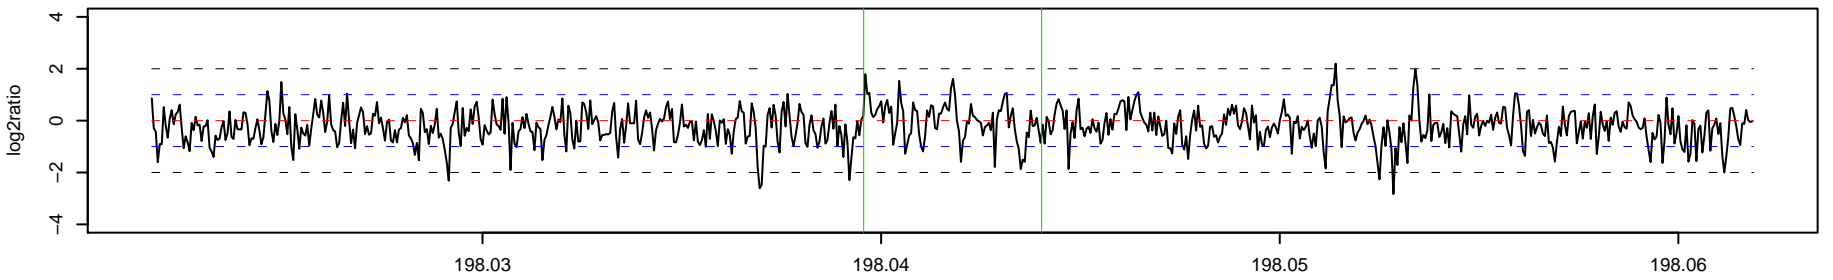

170\_AK1 Chr 3 : 198418904 – 198420549 , 1646 bp (aCGH relative log2ratio= 0.97 )

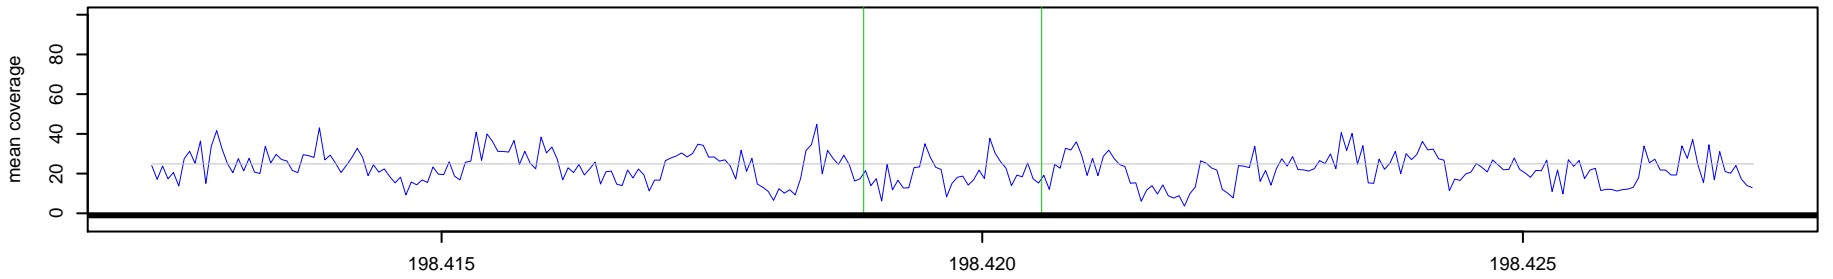

170\_NA10851 Chr 3 : 198418904 – 198420549 , 1646 bp (aCGH relative log2ratio= 0.97 )

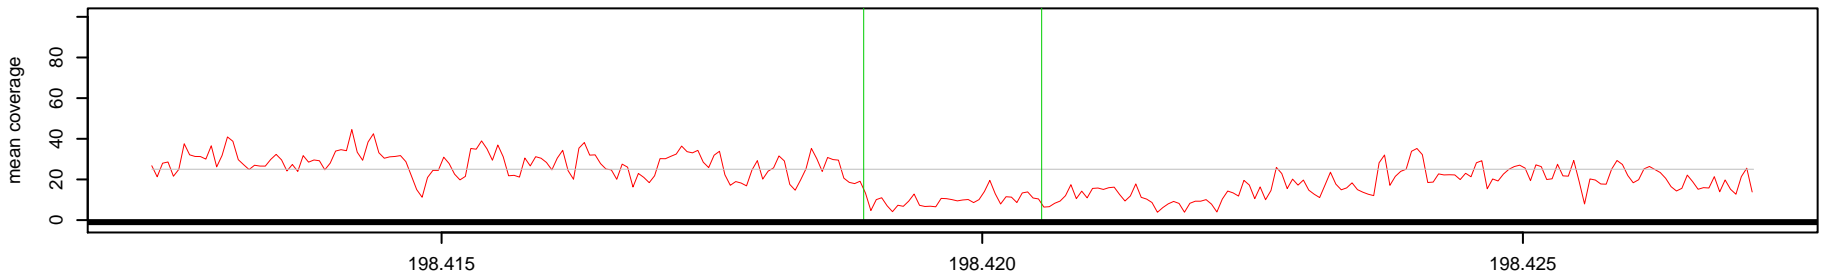

Log2( AK1 read depth / NA10851 read depth)

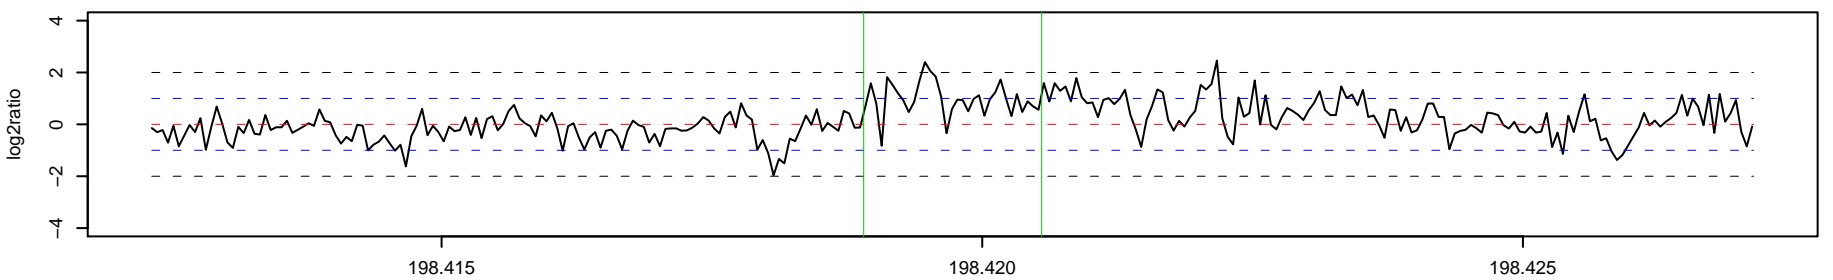

171\_AK1 Chr 4 : 6703481 – 6703991 , 511 bp (aCGH relative log2ratio= 0.67 )

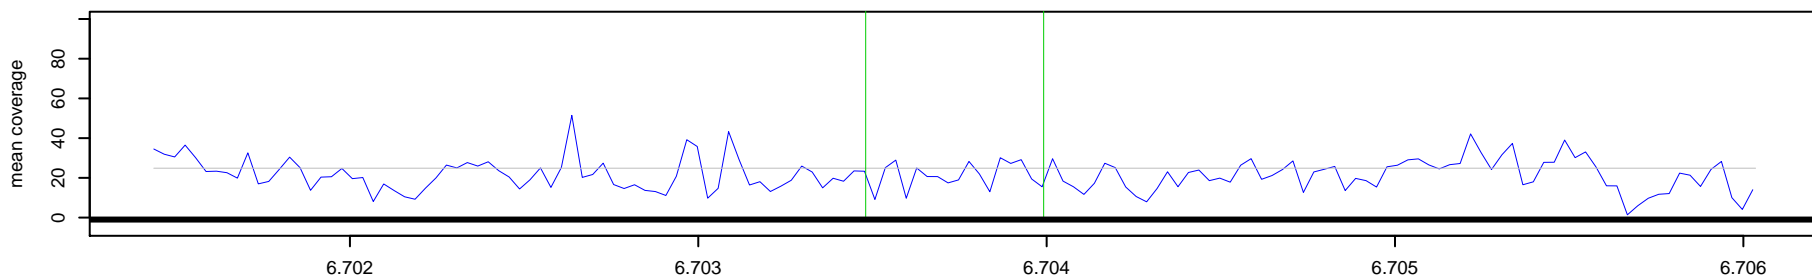

171\_NA10851 Chr 4 : 6703481 – 6703991 , 511 bp (aCGH relative log2ratio= 0.67 )

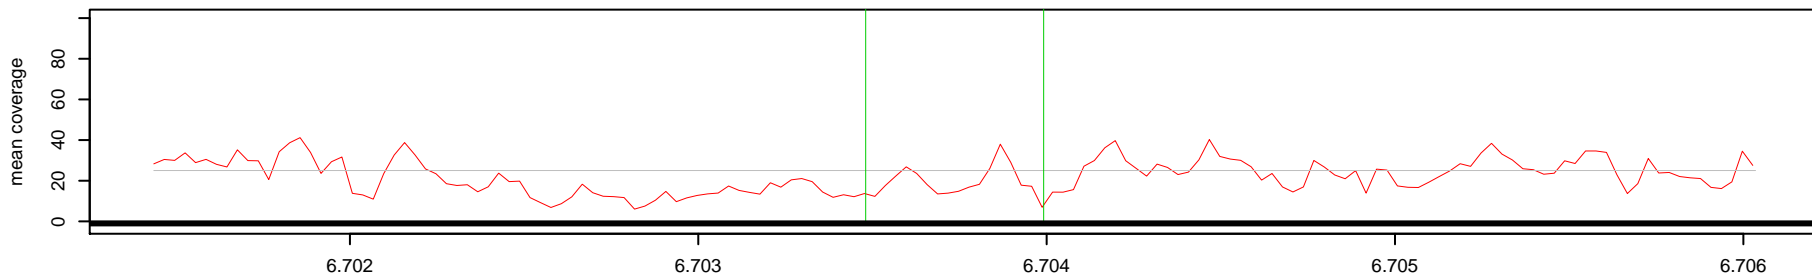

Log2( AK1 read depth / NA10851 read depth)

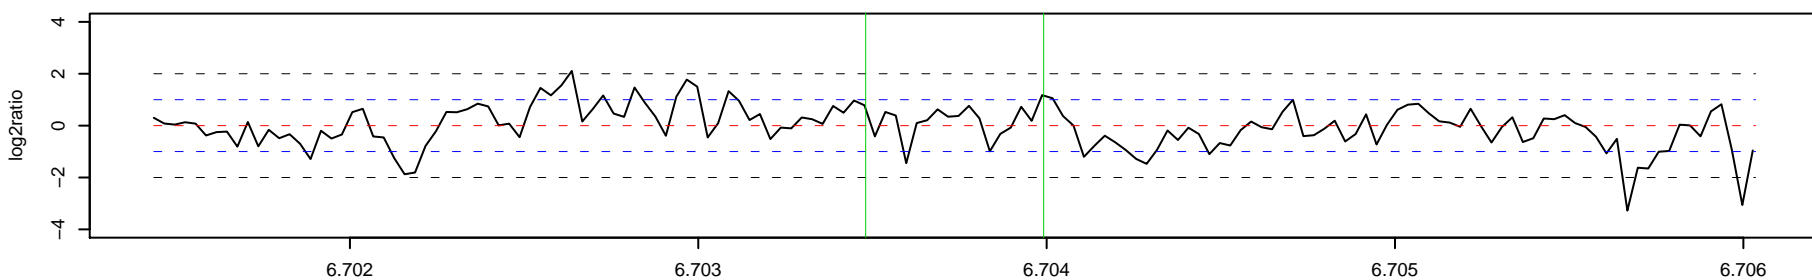

o

o

172\_AK1 Chr 4 : 9820287 – 9843631 , 23345 bp (aCGH relative log2ratio= 2.25 )

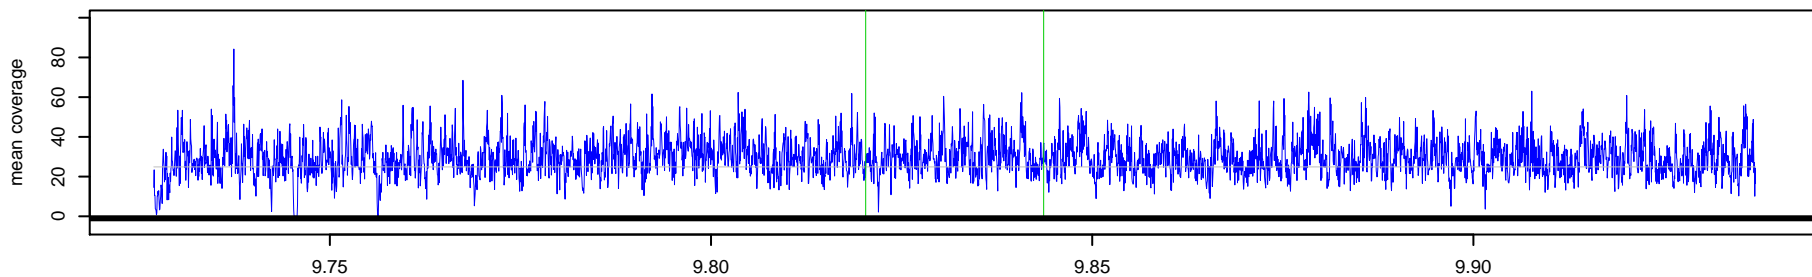

172\_NA10851 Chr 4 : 9820287 – 9843631 , 23345 bp (aCGH relative log2ratio= 2.25 )

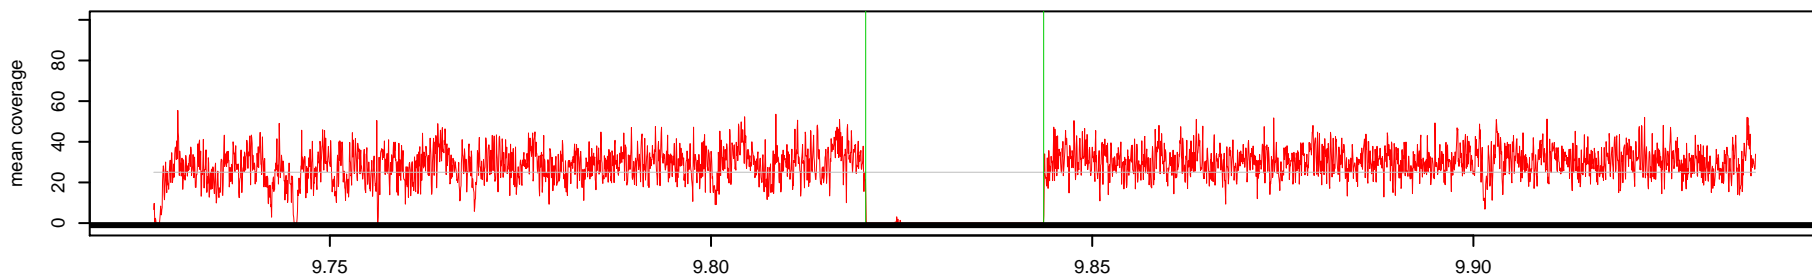

Log2( AK1 read depth / NA10851 read depth)

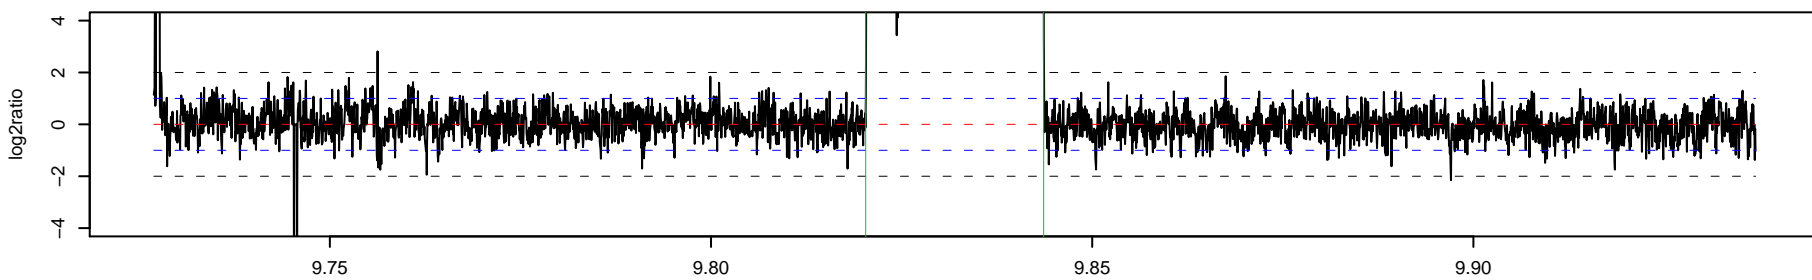

173\_AK1 Chr 4 : 10007962 – 10009026 , 1065 bp (aCGH relative log2ratio= -0.85 )

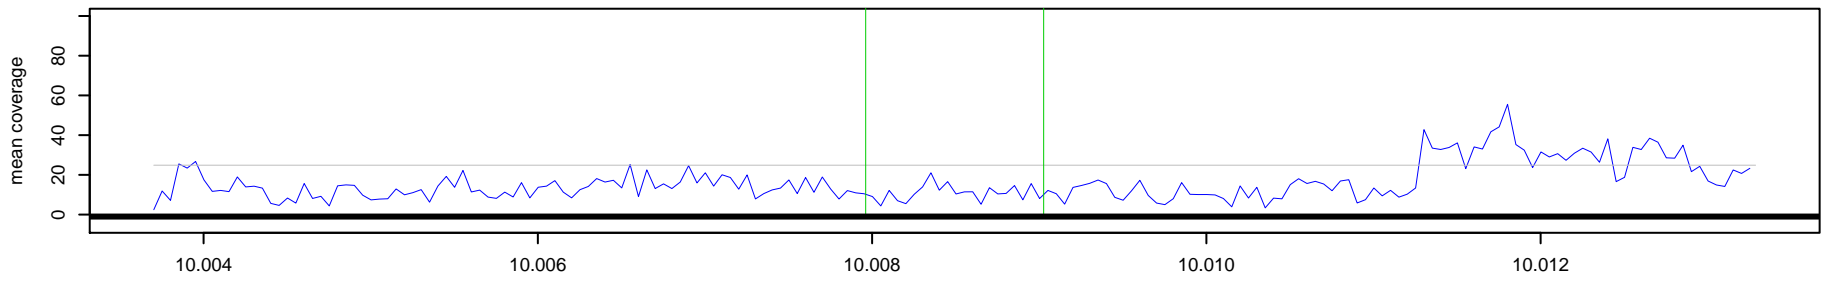

173\_NA10851 Chr 4 : 10007962 – 10009026 , 1065 bp (aCGH relative log2ratio= -0.85 )

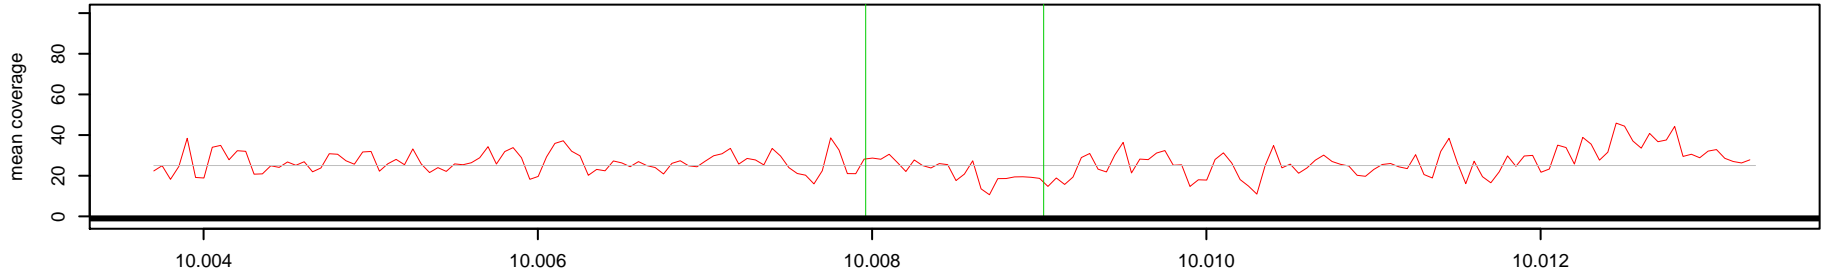

Log2( AK1 read depth / NA10851 read depth)

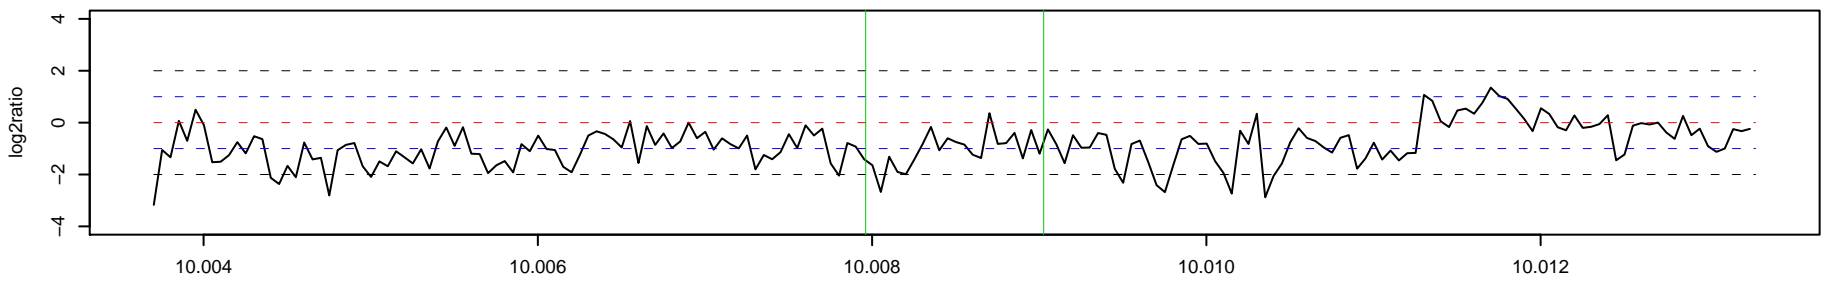

174\_AK1 Chr 4 : 13215741 – 13219434 , 3694 bp (aCGH relative log2ratio= 0.22 )

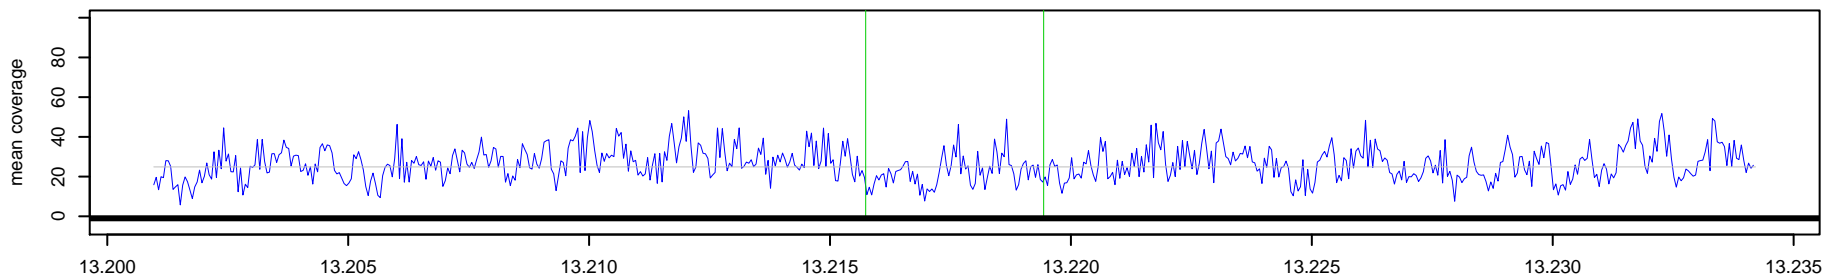

174\_NA10851 Chr 4 : 13215741 – 13219434 , 3694 bp (aCGH relative log2ratio= 0.22 )

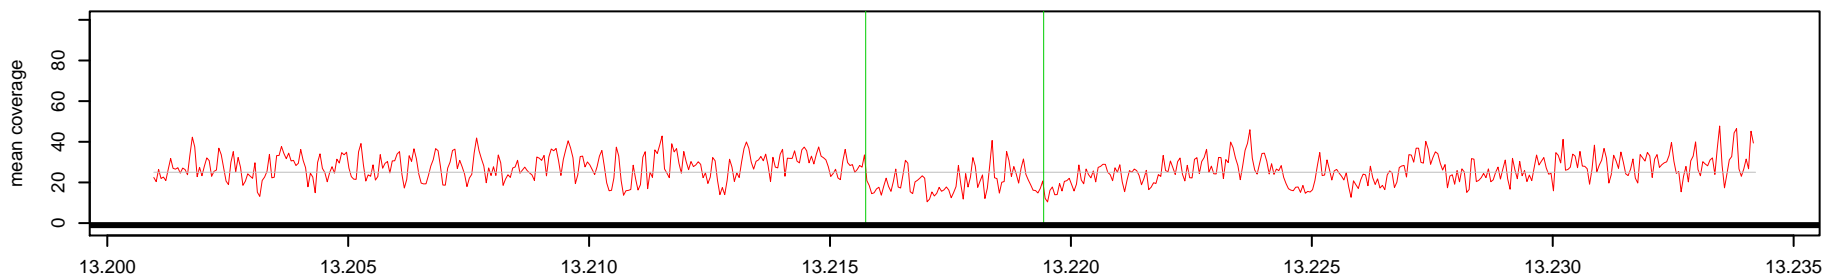

Log2( AK1 read depth / NA10851 read depth)

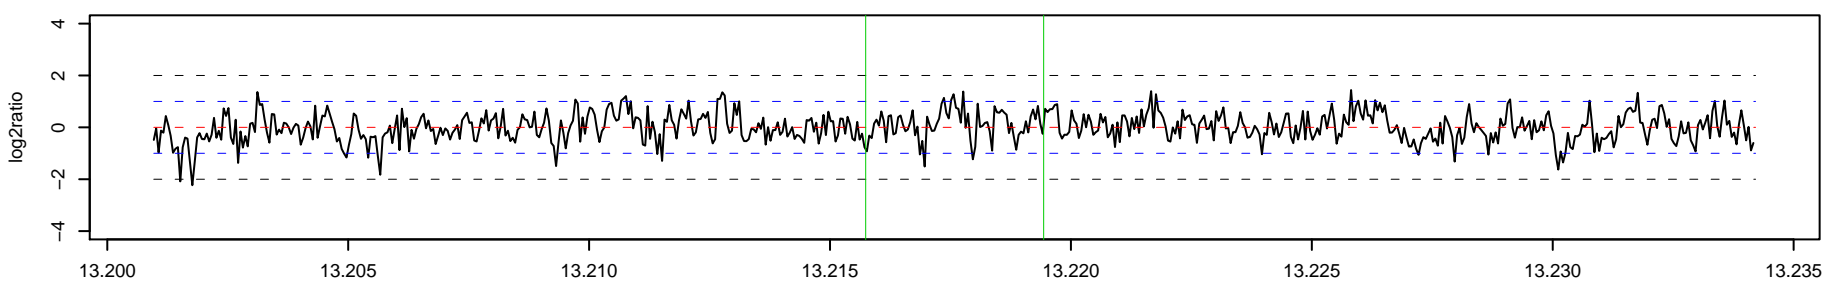

175\_AK1 Chr 4 : 18666521 – 18667058 , 538 bp (aCGH relative log2ratio= 1.10 )

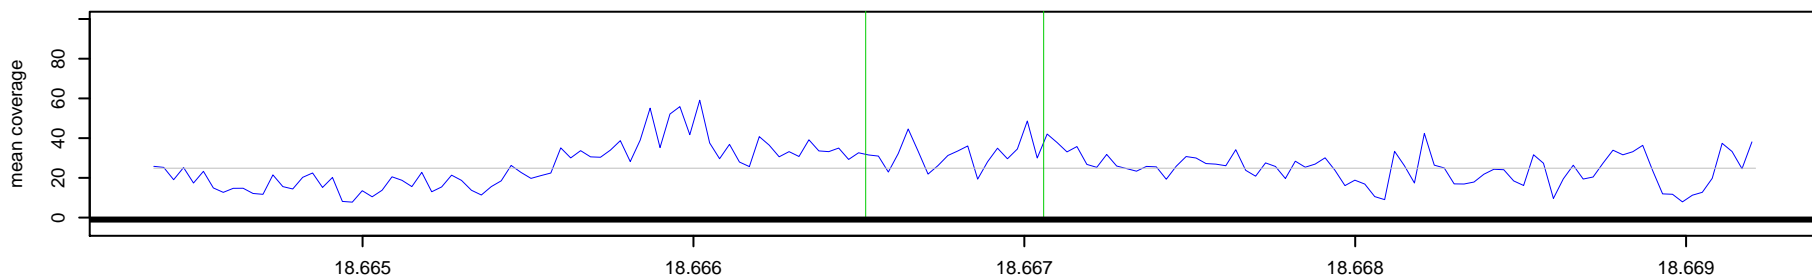

175\_NA10851 Chr 4 : 18666521 – 18667058 , 538 bp (aCGH relative log2ratio= 1.10 )

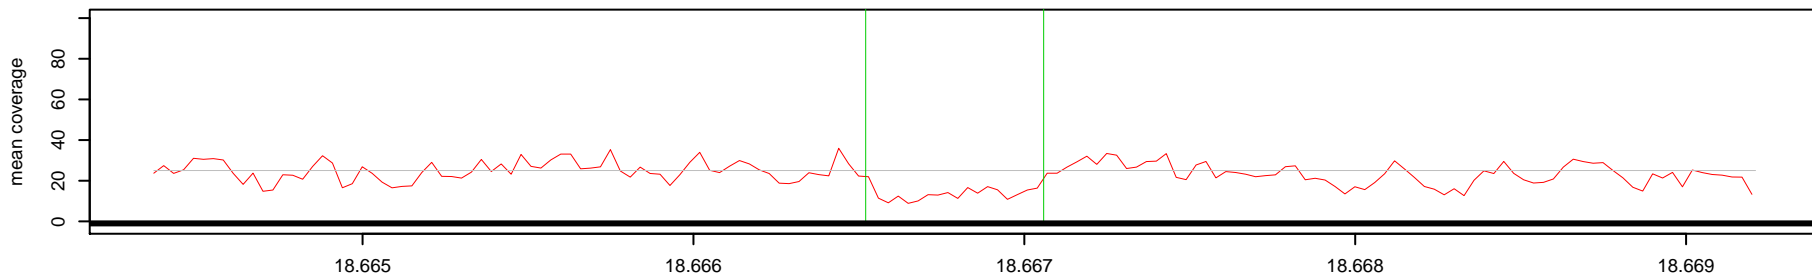

Log2( AK1 read depth / NA10851 read depth)

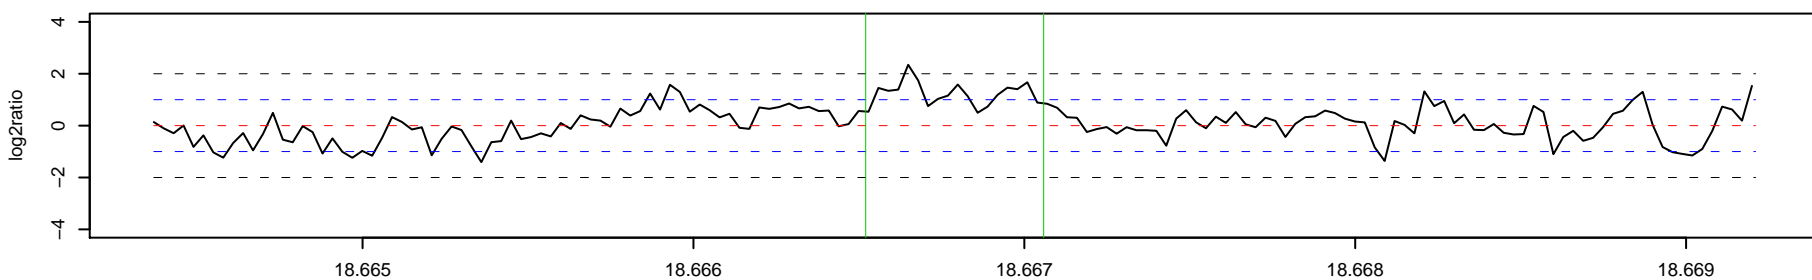

176\_AK1 Chr 4 : 33510785 – 33525344 , 14560 bp (aCGH relative log2ratio= 0.46 )

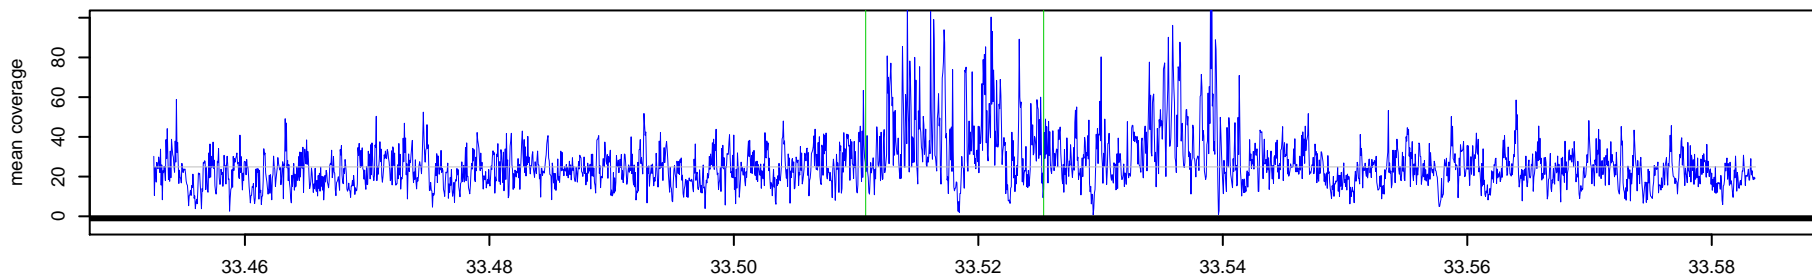

176\_NA10851 Chr 4 : 33510785 – 33525344 , 14560 bp (aCGH relative log2ratio= 0.46 )

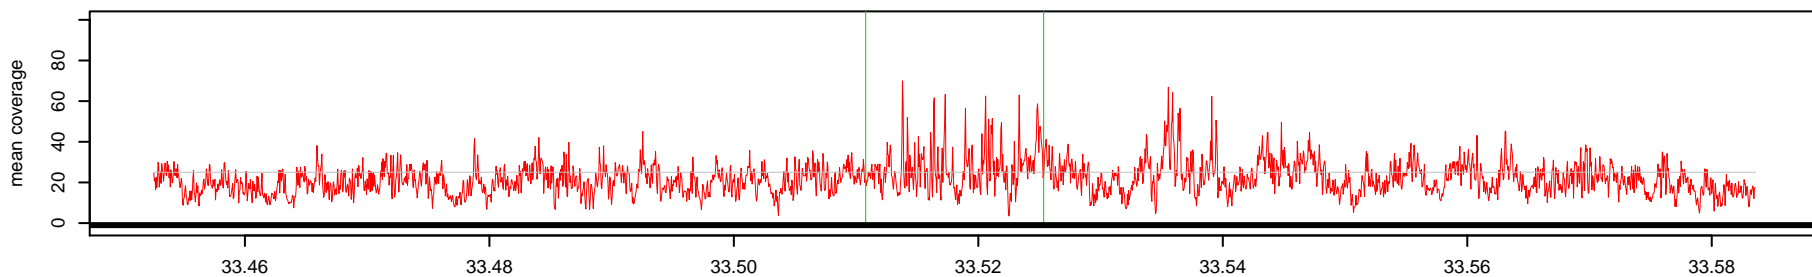

Log2( AK1 read depth / NA10851 read depth)

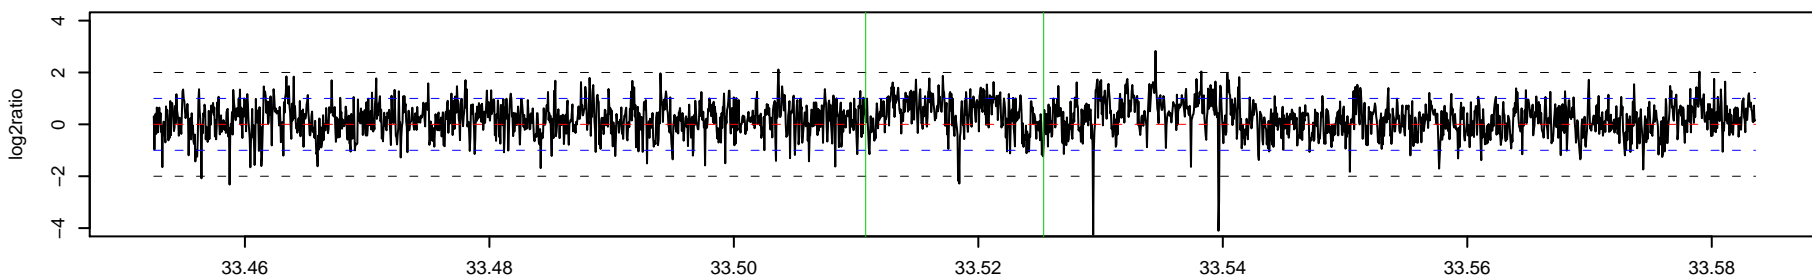

177\_AK1 Chr 4 : 33698756 – 33699365 , 610 bp (aCGH relative log2ratio= 0.72 )

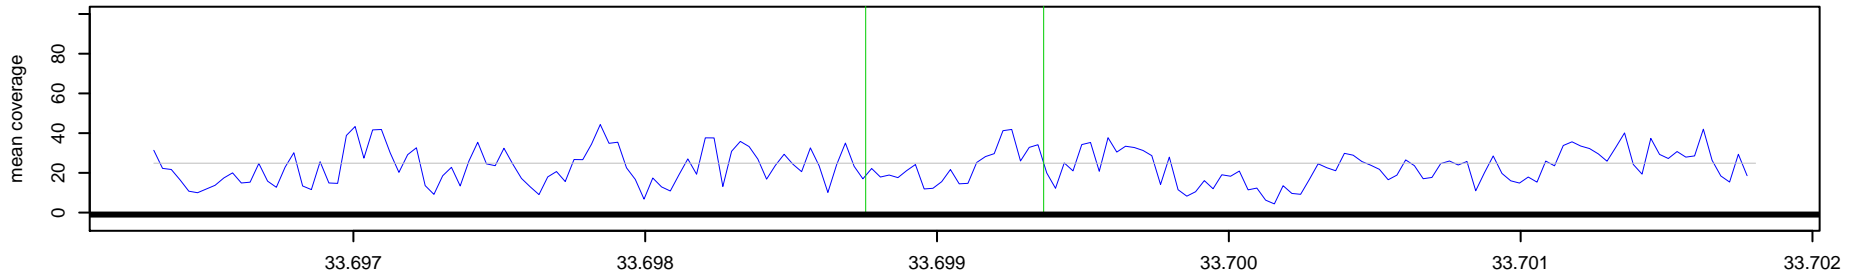

177\_NA10851 Chr 4 : 33698756 – 33699365 , 610 bp (aCGH relative log2ratio= 0.72 )

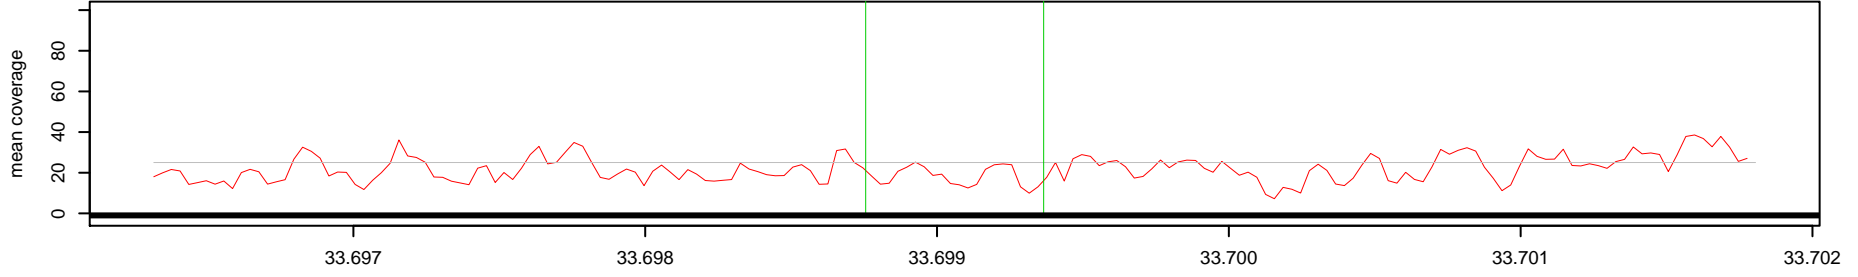

Log2( AK1 read depth / NA10851 read depth)

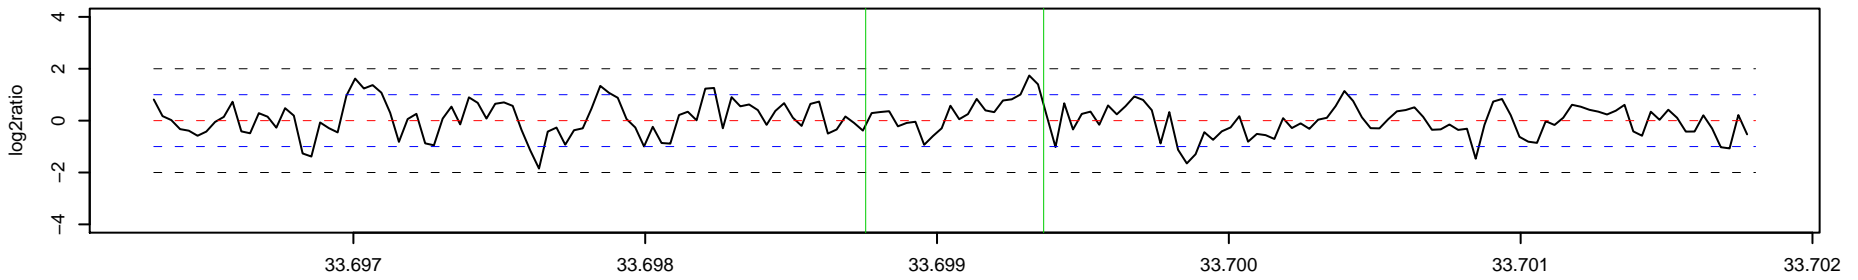

178\_AK1 Chr 4 : 34457201 – 34503723 , 46523 bp (aCGH relative log2ratio= 0.93 )

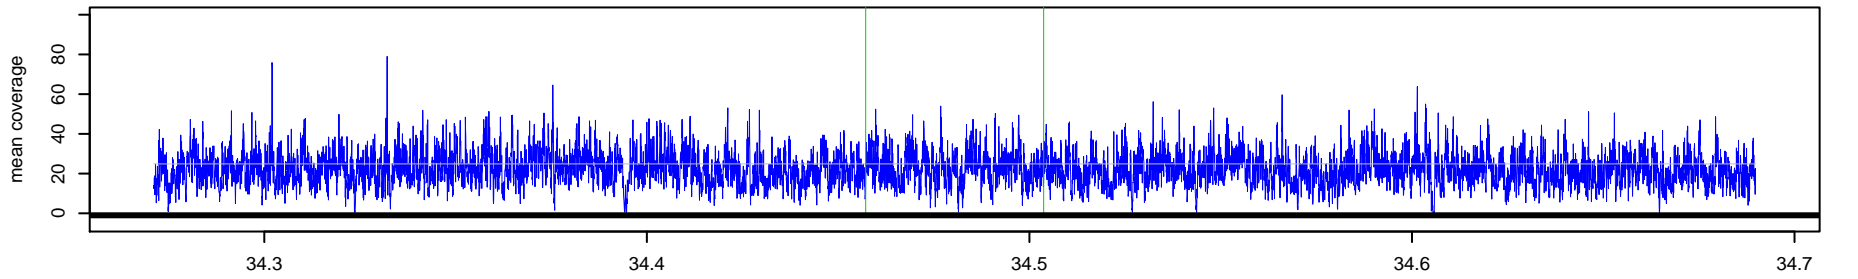

178\_NA10851 Chr 4 : 34457201 – 34503723 , 46523 bp (aCGH relative log2ratio= 0.93 )

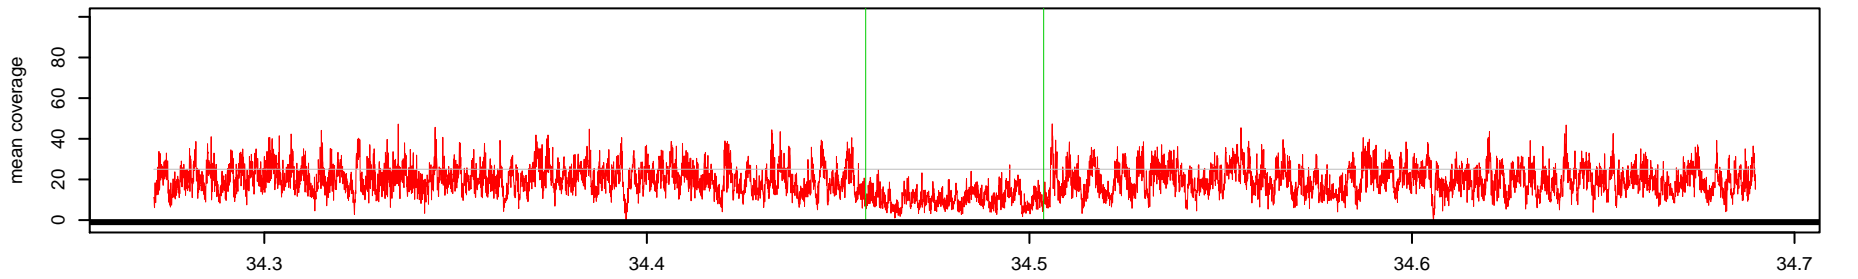

Log2( AK1 read depth / NA10851 read depth)

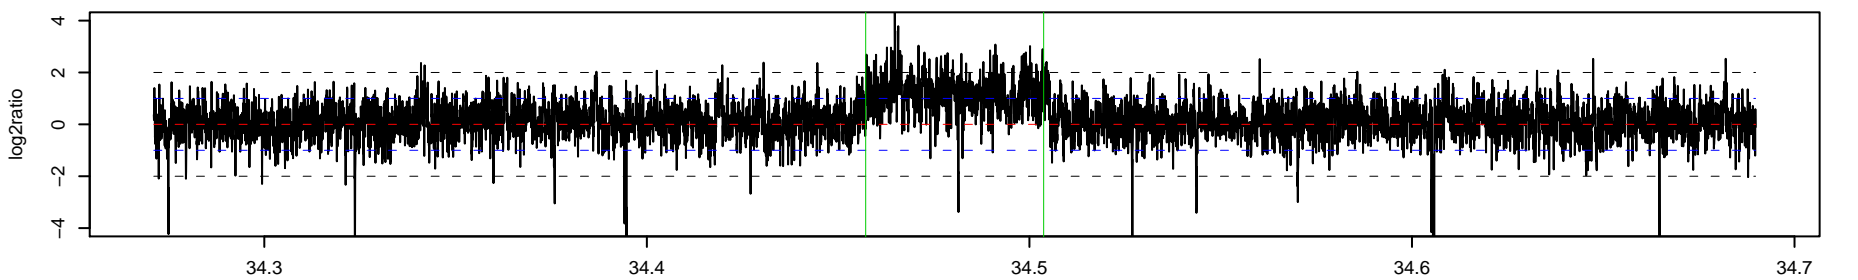

179\_AK1 Chr 4 : 63357053 – 63358797 , 1745 bp (aCGH relative log2ratio= -4.24 )

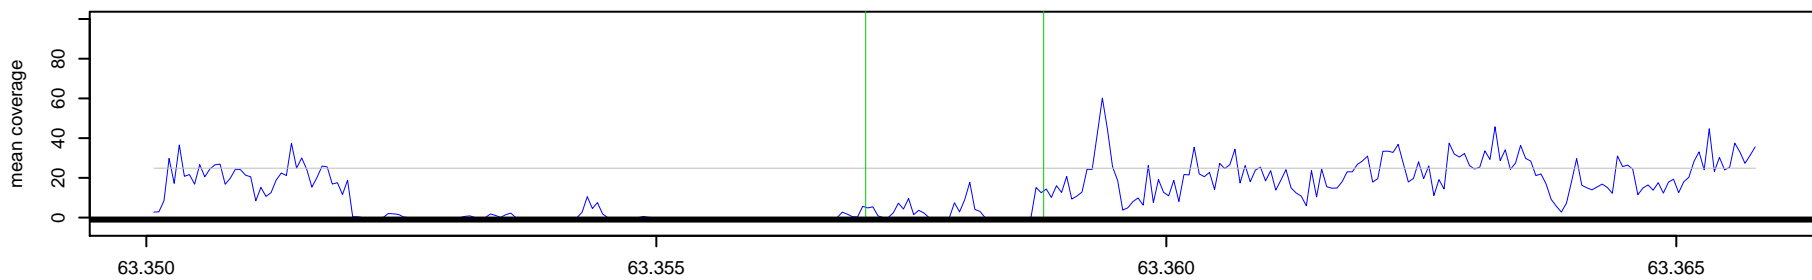

179\_NA10851 Chr 4 : 63357053 – 63358797 , 1745 bp (aCGH relative log2ratio= -4.24 )

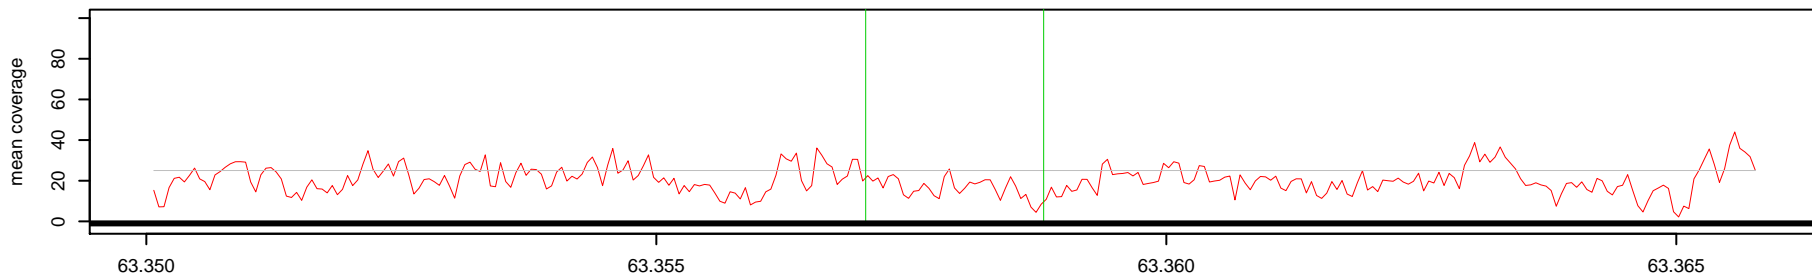

Log2( AK1 read depth / NA10851 read depth)

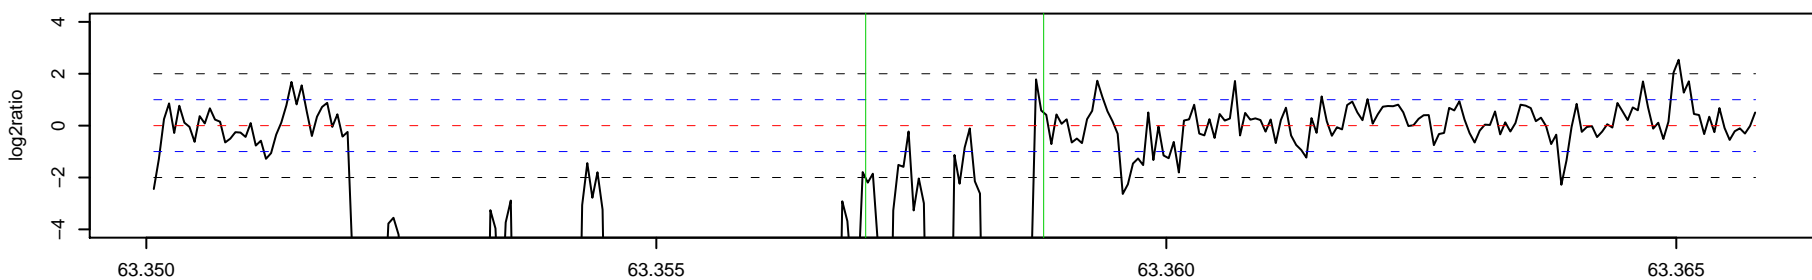

180\_AK1 Chr 4 : 69057495 – 69165909 , 108415 bp (aCGH relative log2ratio= 1.29 )

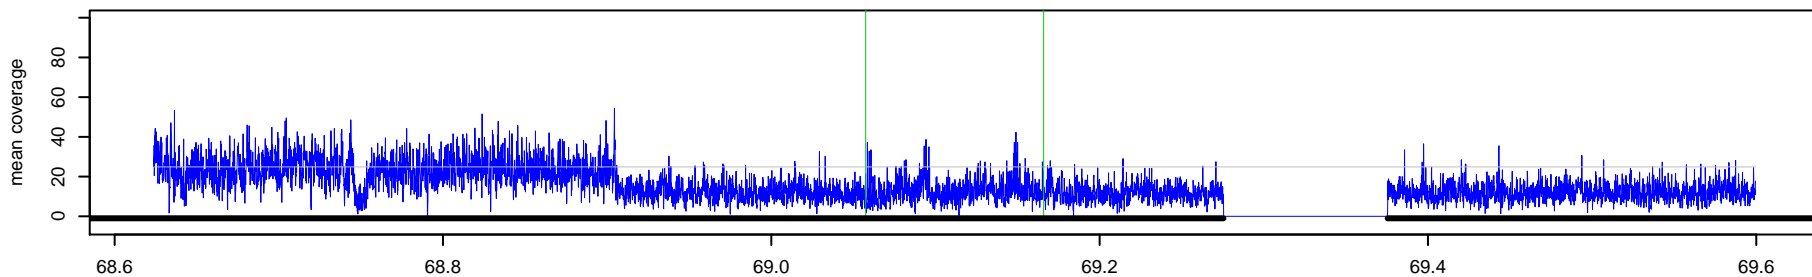

180\_NA10851 Chr 4 : 69057495 – 69165909 , 108415 bp (aCGH relative log2ratio= 1.29 )

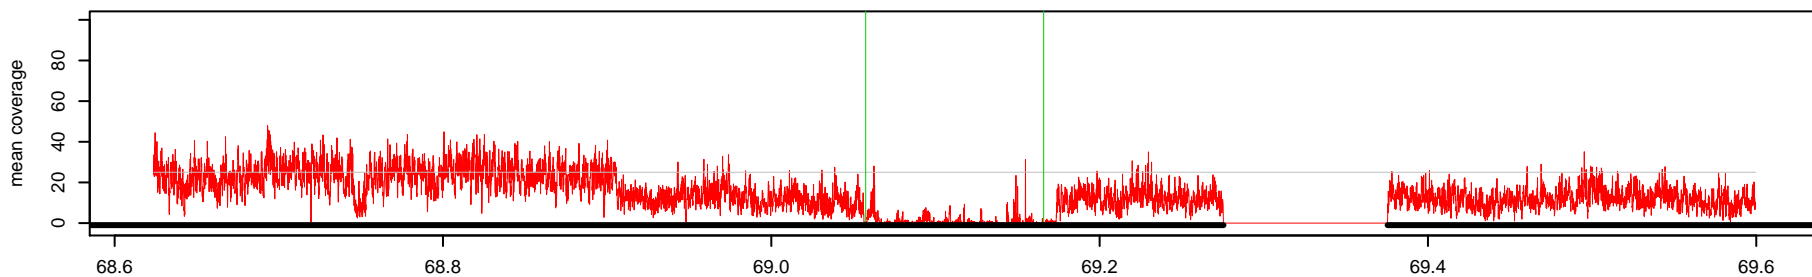

Log2( AK1 read depth / NA10851 read depth)

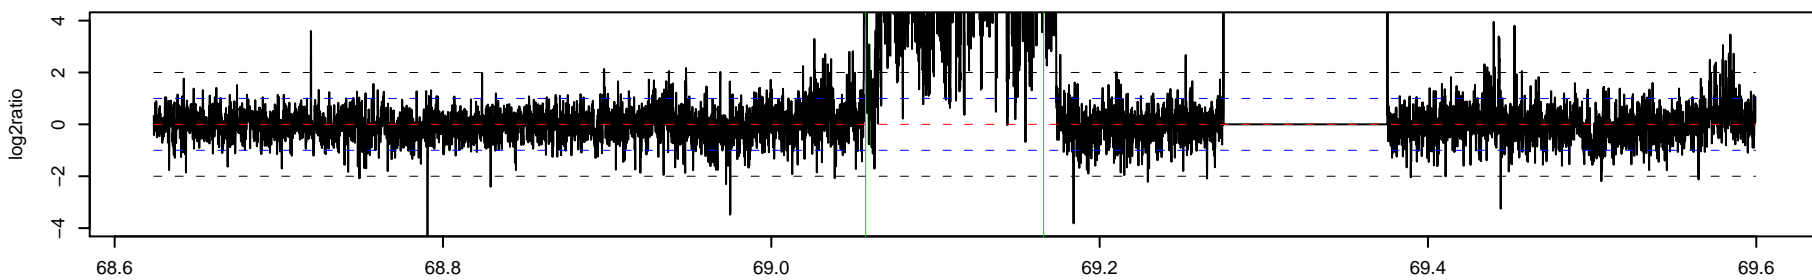

181\_AK1 Chr 4 : 69139289 – 69153875 , 14587 bp (aCGH relative log2ratio= 2.42 )

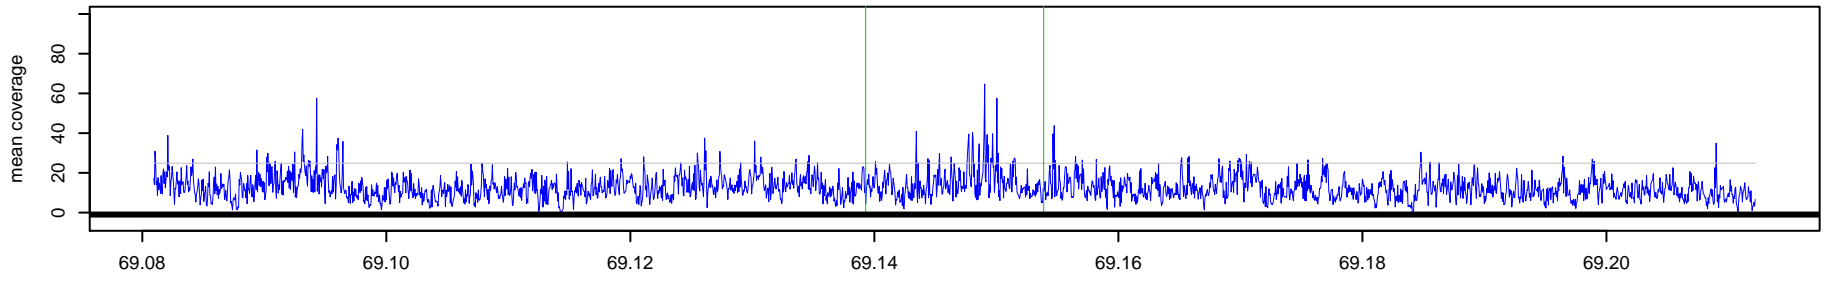

181\_NA10851 Chr 4 : 69139289 – 69153875 , 14587 bp (aCGH relative log2ratio= 2.42 )

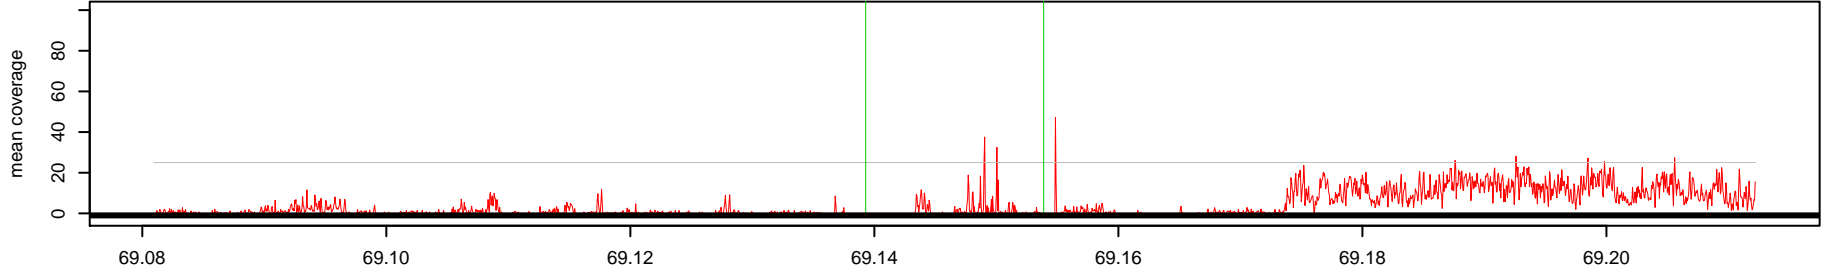

Log2( AK1 read depth / NA10851 read depth)

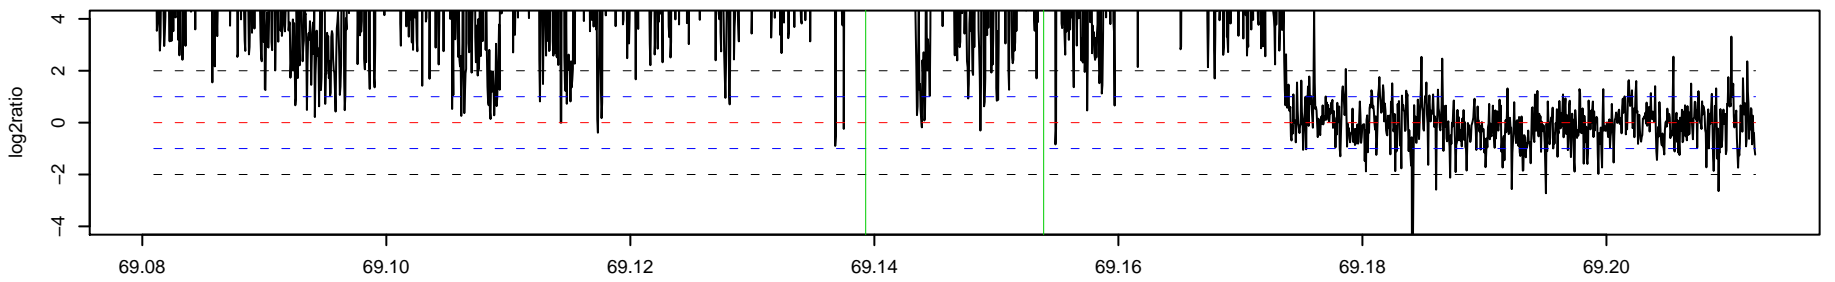

182\_AK1 Chr 4 : 81112925 – 81113465 , 541 bp (aCGH relative log2ratio= 0.76 )

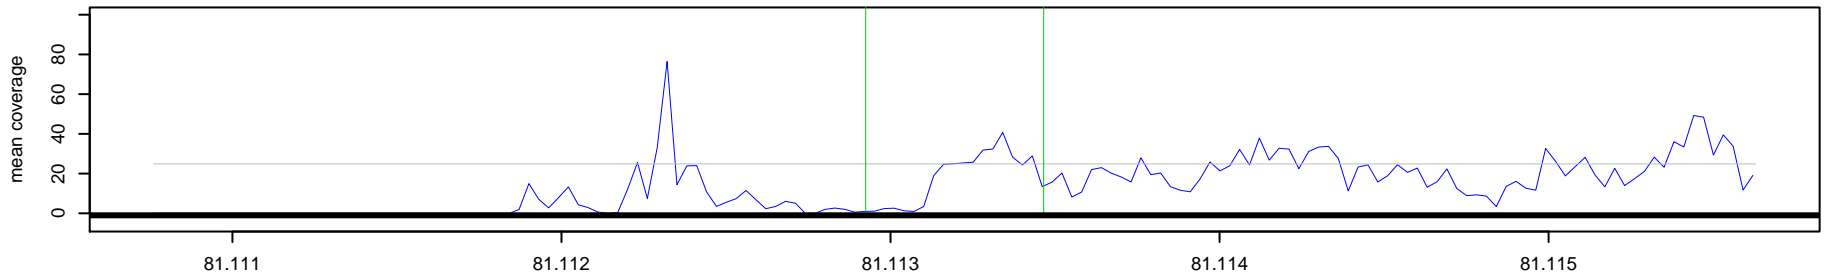

182\_NA10851 Chr 4 : 81112925 – 81113465 , 541 bp (aCGH relative log2ratio= 0.76 )

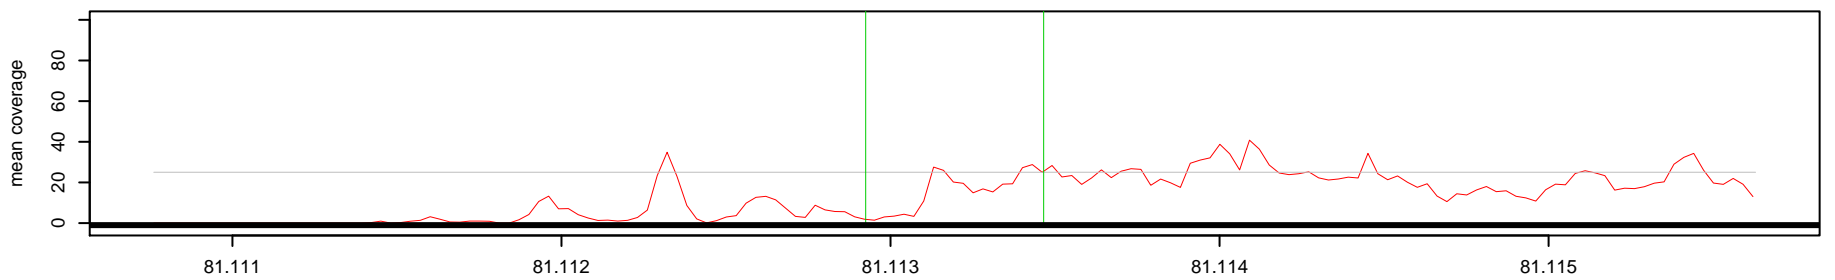

Log2( AK1 read depth / NA10851 read depth)

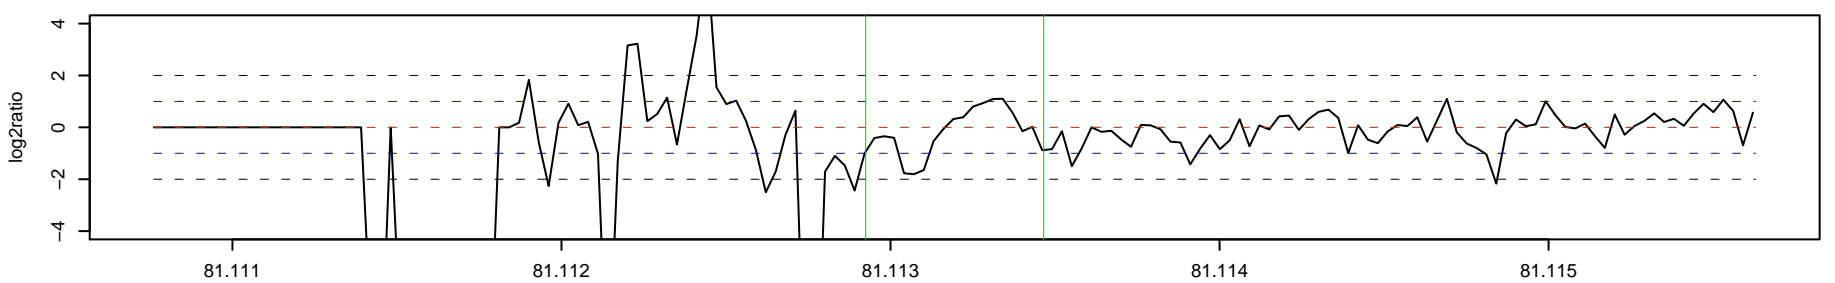

183\_AK1 Chr 4 : 94076279 – 94078781 , 2503 bp (aCGH relative log2ratio= -0.88 )

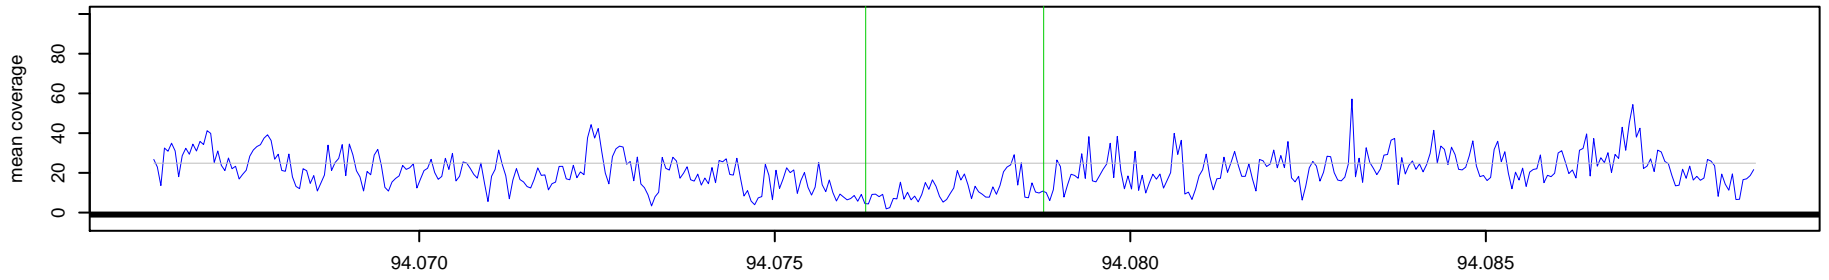

183\_NA10851 Chr 4 : 94076279 – 94078781 , 2503 bp (aCGH relative log2ratio= -0.88 )

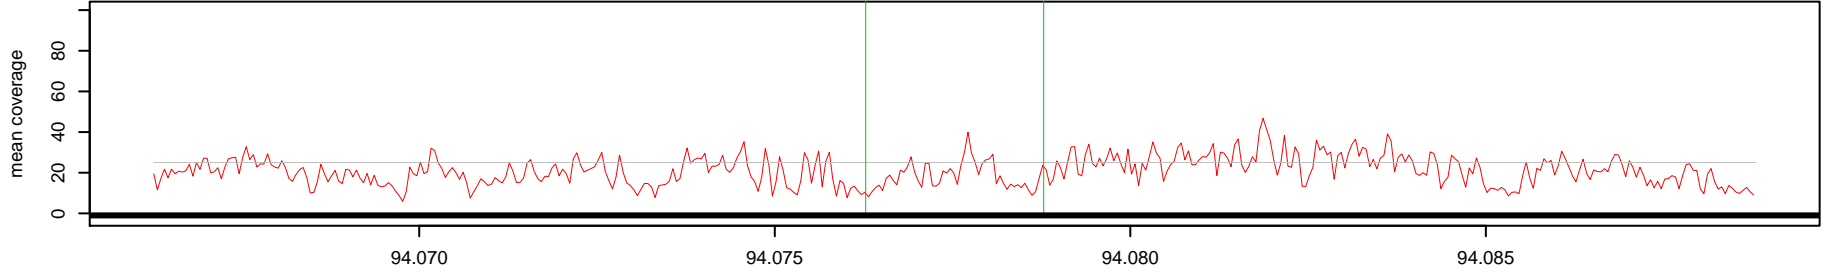

Log2( AK1 read depth / NA10851 read depth)

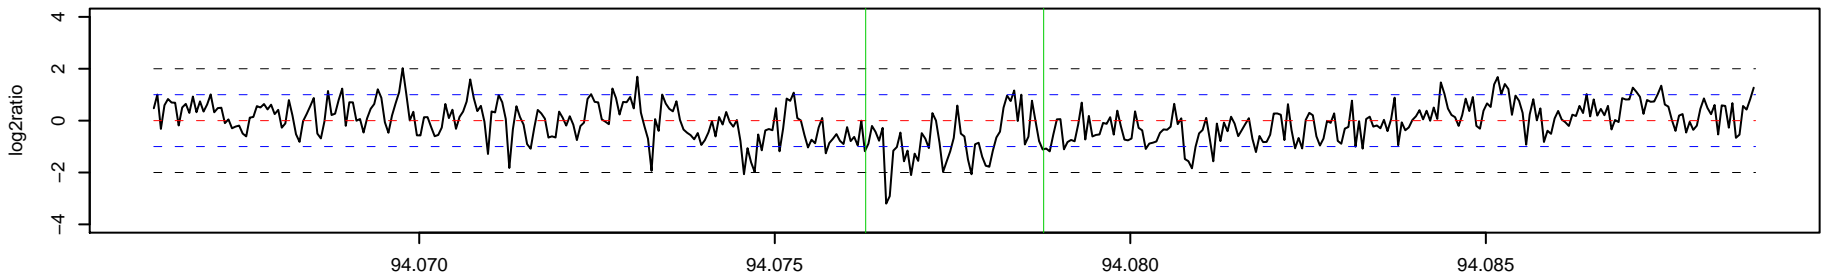

184\_AK1 Chr 4 : 94560382 – 94560982 , 601 bp (aCGH relative log2ratio= 0.52 )

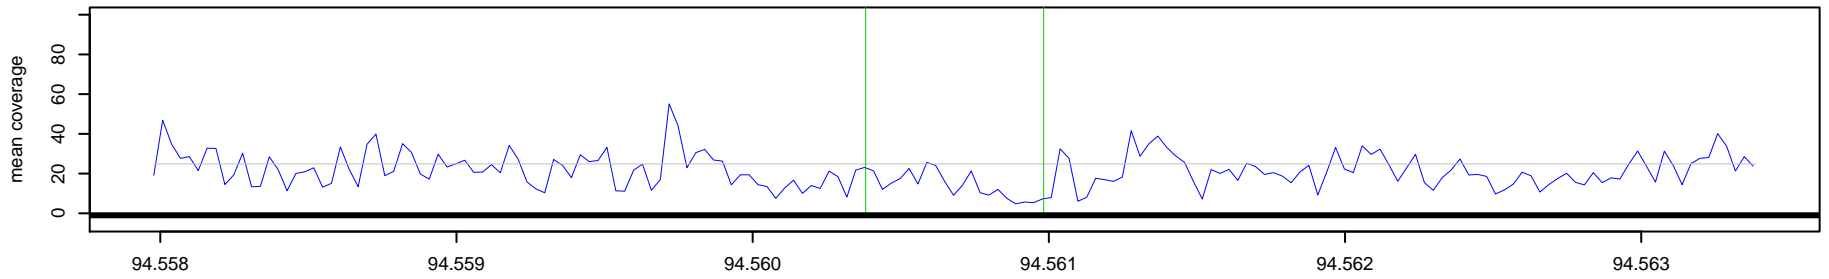

184\_NA10851 Chr 4 : 94560382 – 94560982 , 601 bp (aCGH relative log2ratio= 0.52 )

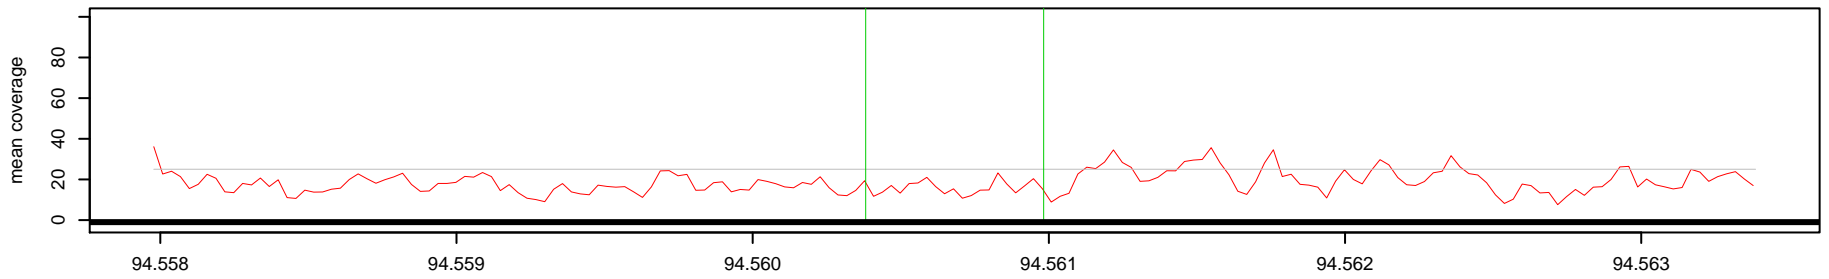

Log2( AK1 read depth / NA10851 read depth)

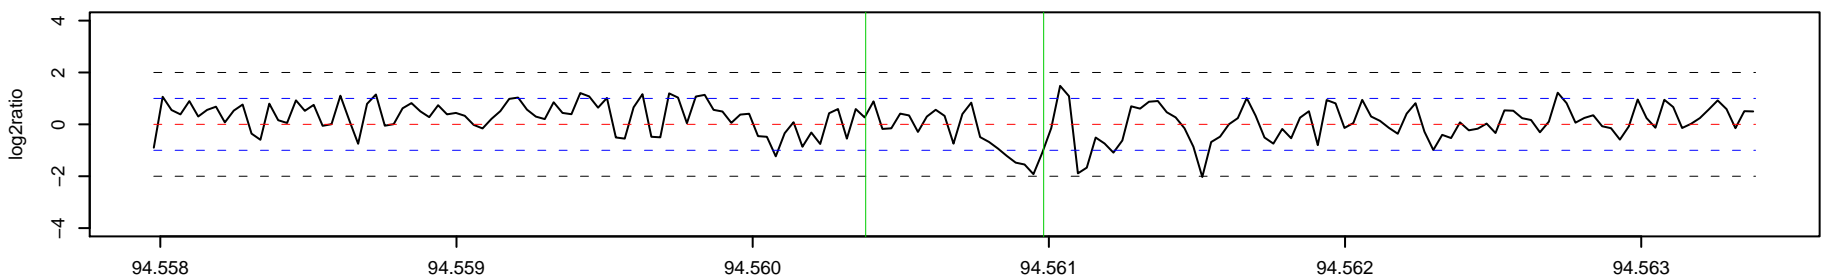



185\_AK1 Chr 4 : 97129381 – 97130234 , 854 bp (aCGH relative log2ratio= 0.50 )

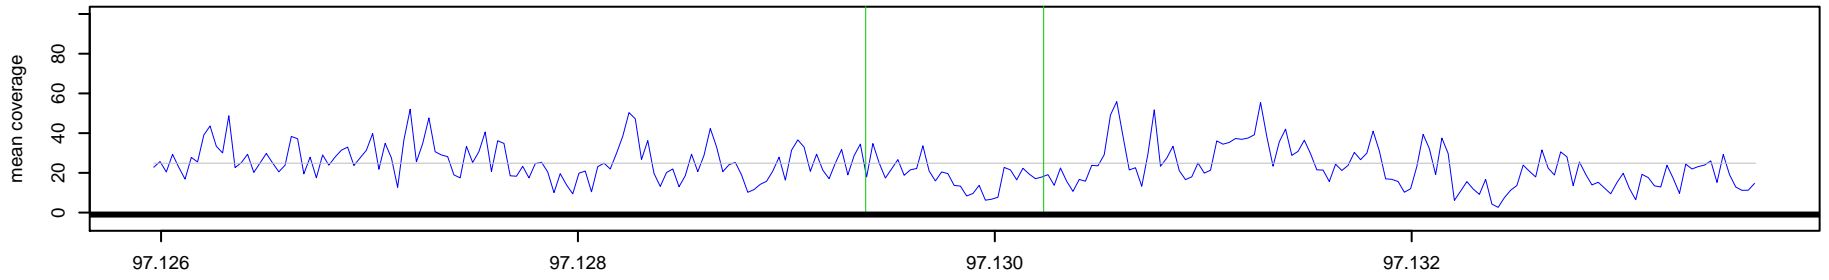

185\_NA10851 Chr 4 : 97129381 – 97130234 , 854 bp (aCGH relative log2ratio= 0.50 )

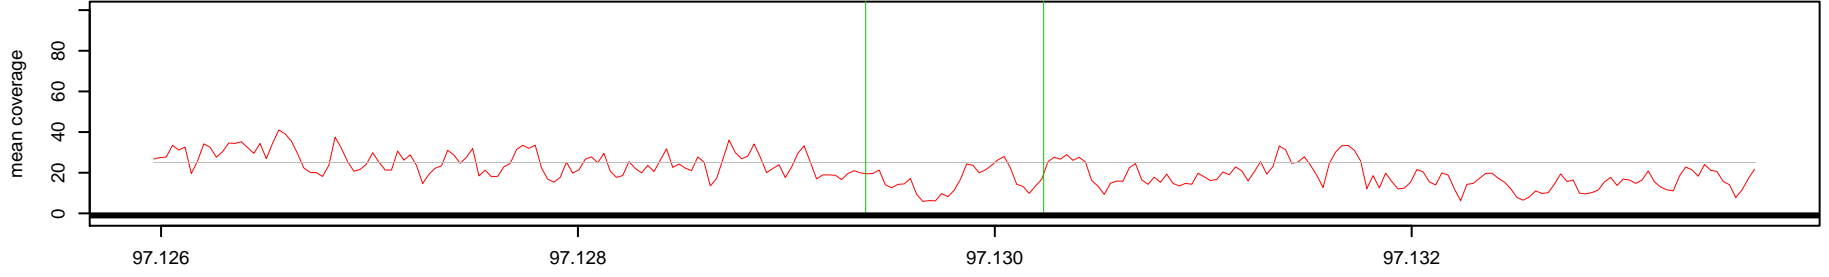

Log2( AK1 read depth / NA10851 read depth)

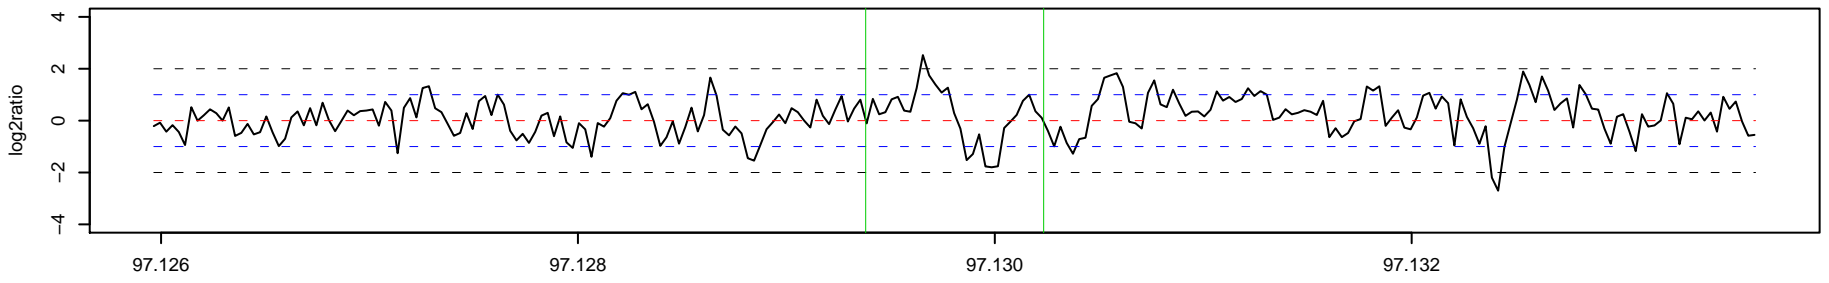

186\_AK1 Chr 4 : 98574519 – 98577185 , 2667 bp (aCGH relative log2ratio= 0.85 )

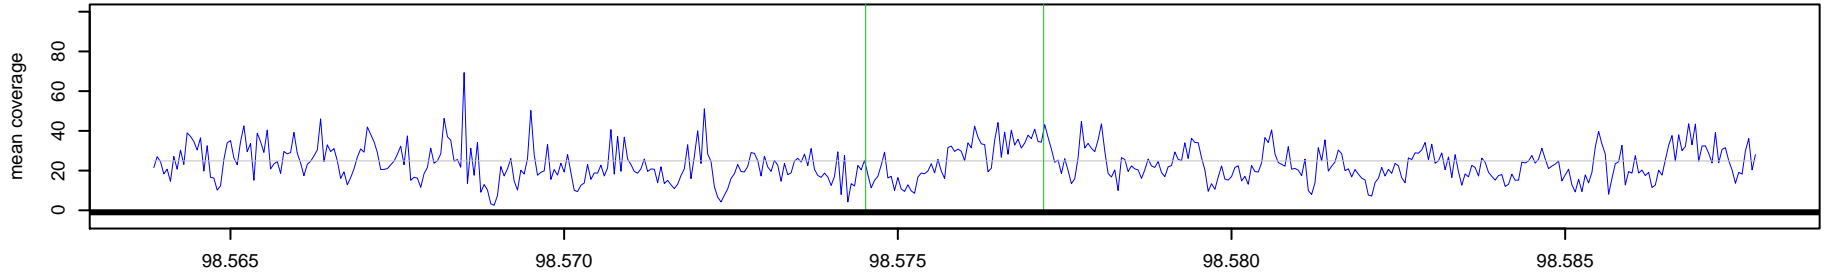

186\_NA10851 Chr 4 : 98574519 – 98577185 , 2667 bp (aCGH relative log2ratio= 0.85 )

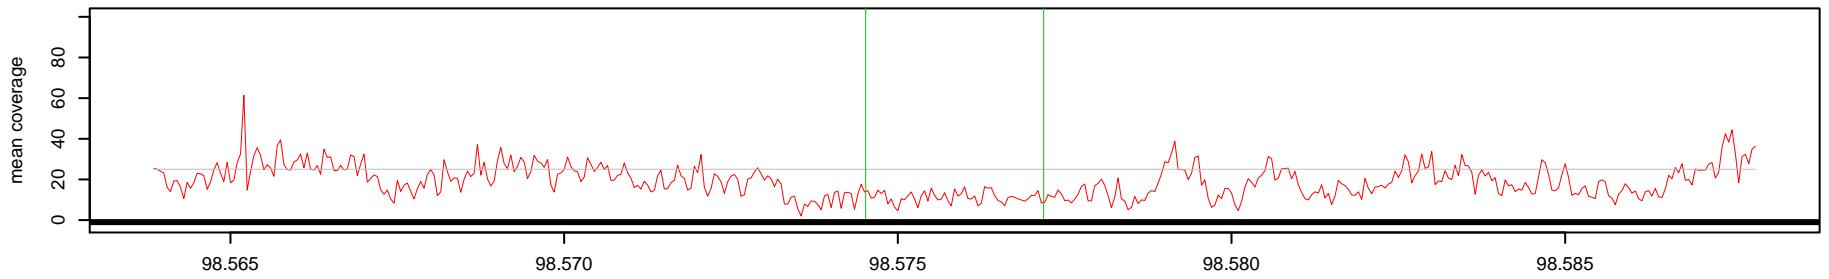

Log2( AK1 read depth / NA10851 read depth)

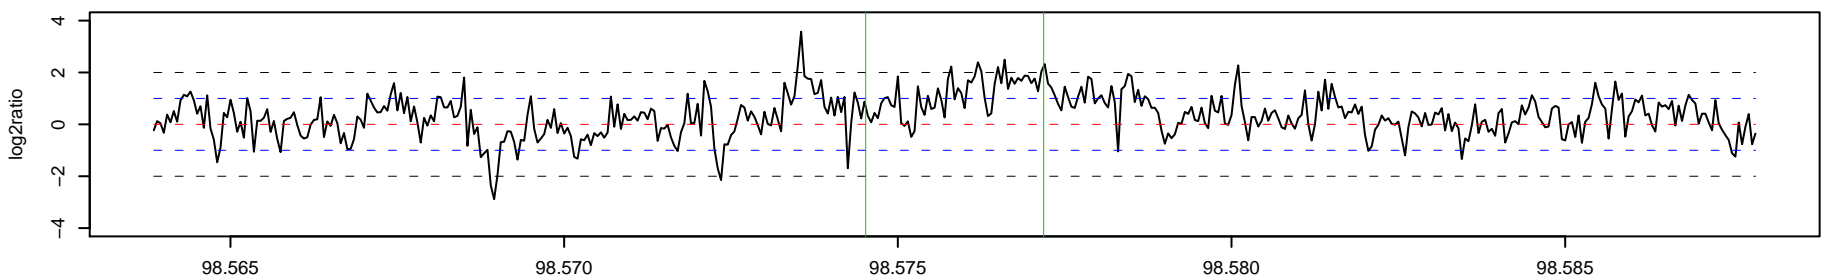

187\_AK1 Chr 4 : 99254480 – 99255173 , 694 bp (aCGH relative log2ratio= 0.70 )

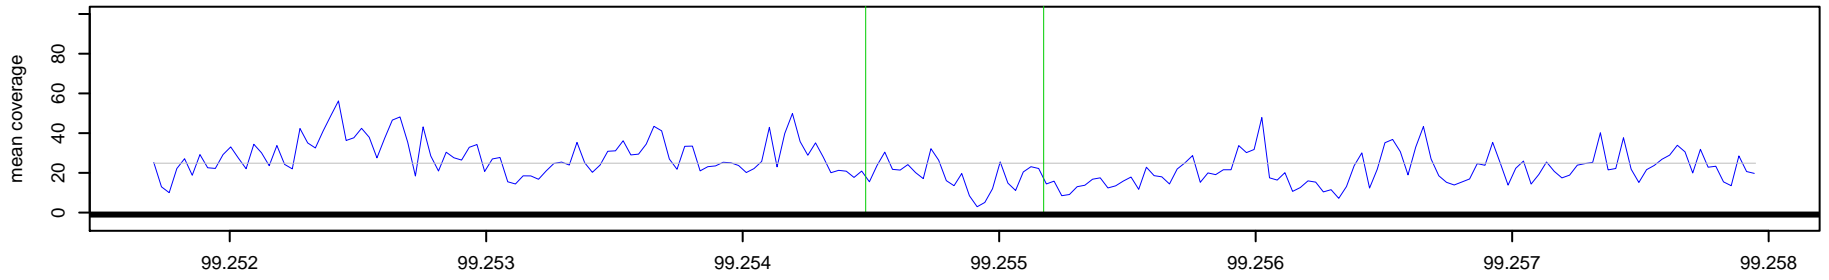

187\_NA10851 Chr 4 : 99254480 – 99255173 , 694 bp (aCGH relative log2ratio= 0.70 )

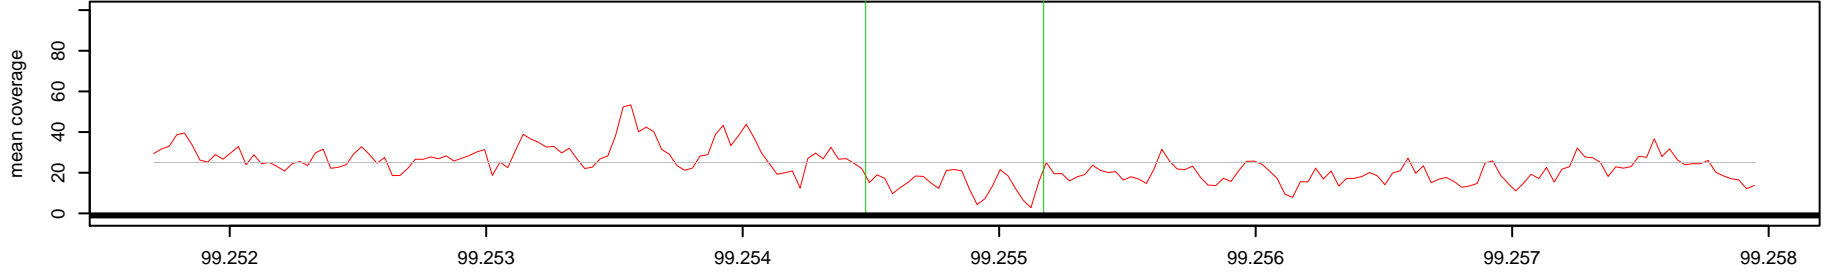

Log2( AK1 read depth / NA10851 read depth)

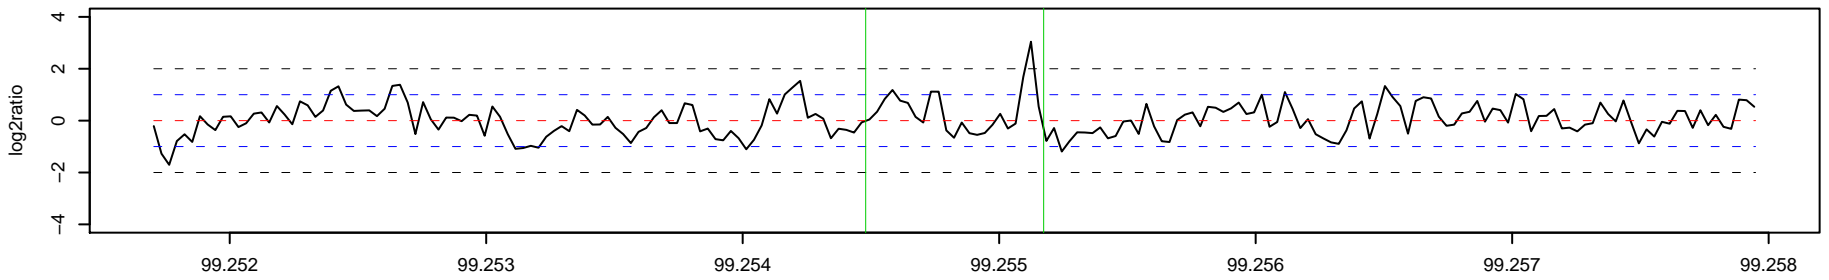

188\_AK1 Chr 4 : 102179088 – 102180228 , 1141 bp (aCGH relative log2ratio= 0.82 )

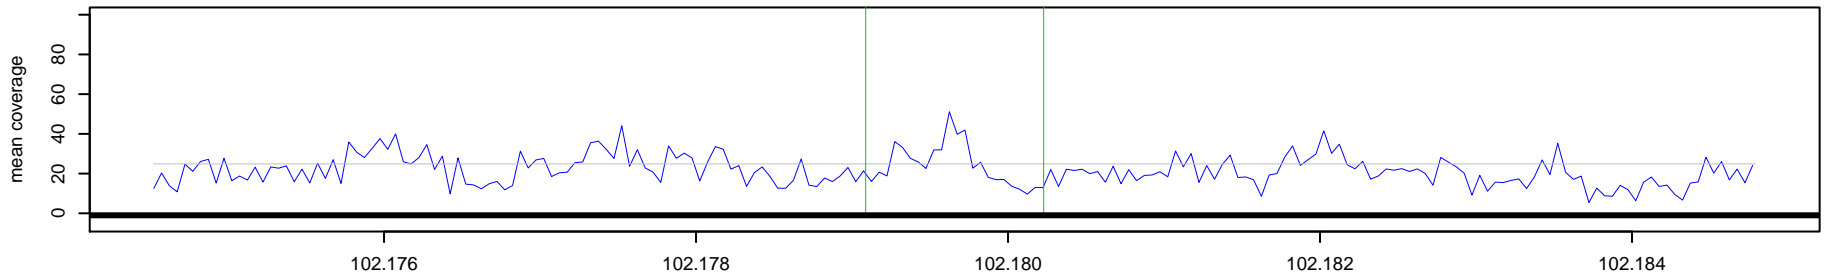

188\_NA10851 Chr 4 : 102179088 – 102180228 , 1141 bp (aCGH relative log2ratio= 0.82 )

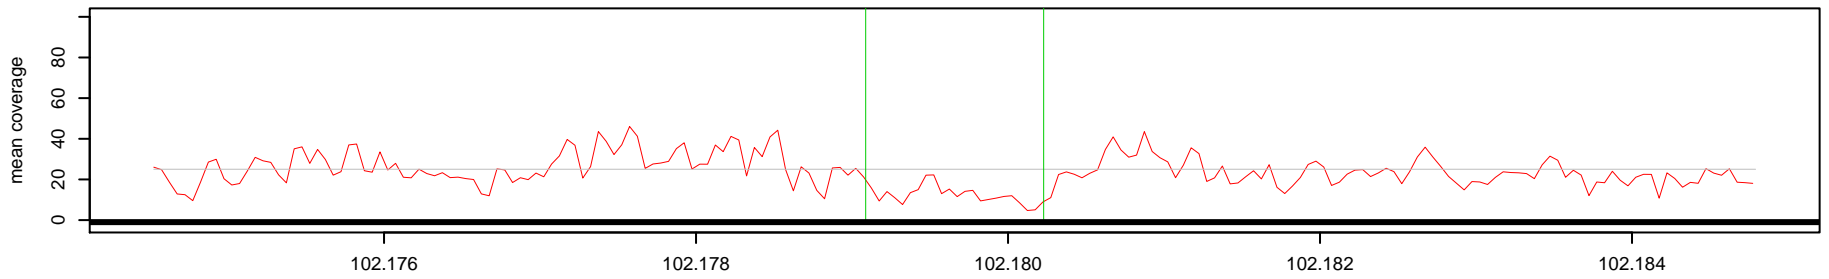

Log2( AK1 read depth / NA10851 read depth)

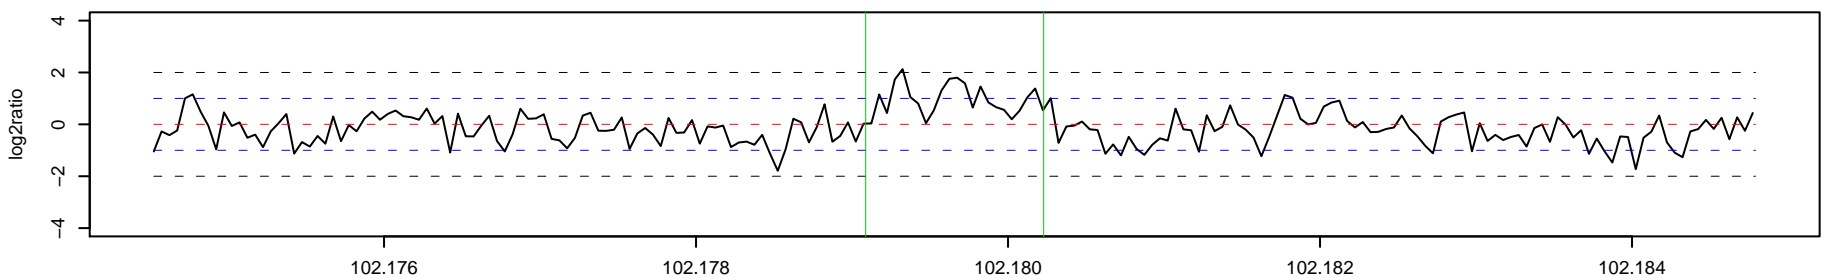

189\_AK1 Chr 4 : 107159885 – 107162345 , 2461 bp (aCGH relative log2ratio= -2.40 )

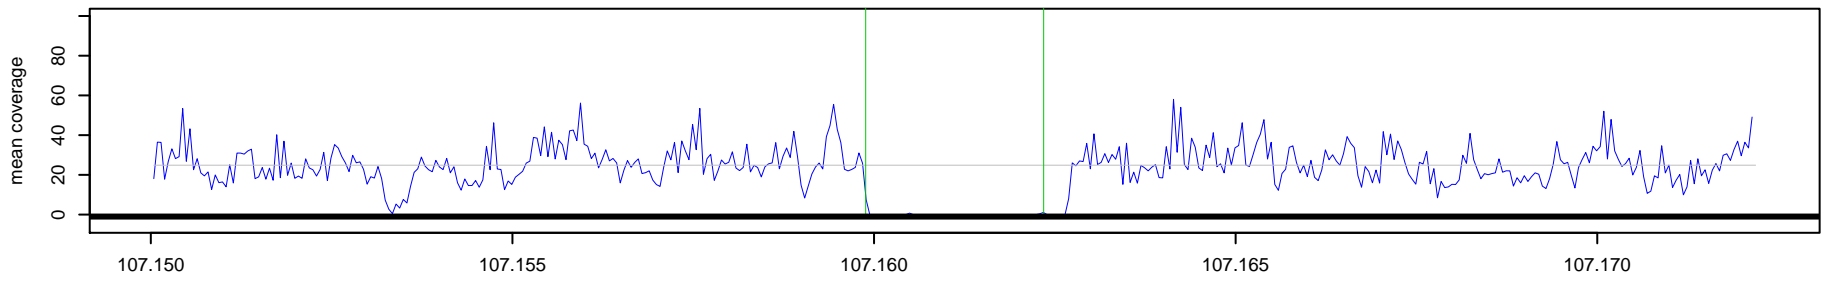

189\_NA10851 Chr 4 : 107159885 – 107162345 , 2461 bp (aCGH relative log2ratio= -2.40 )

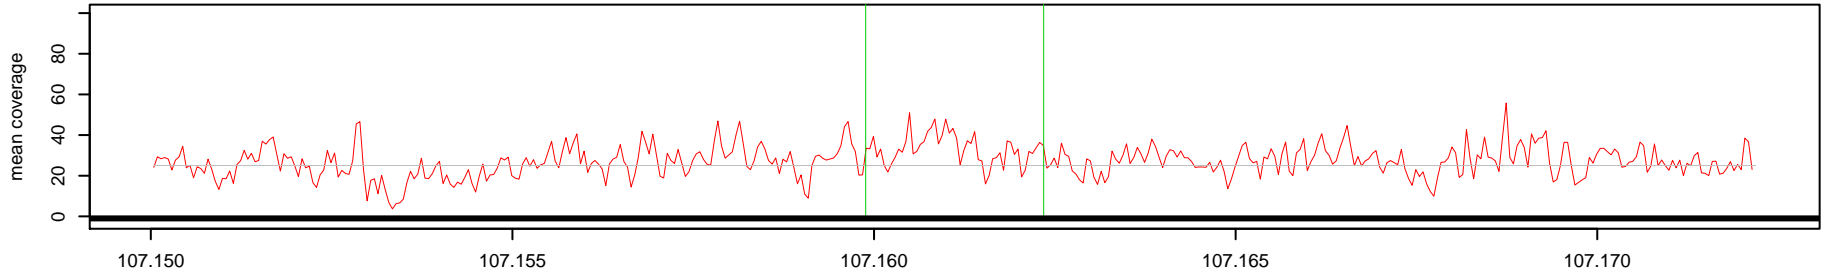

Log2( AK1 read depth / NA10851 read depth)

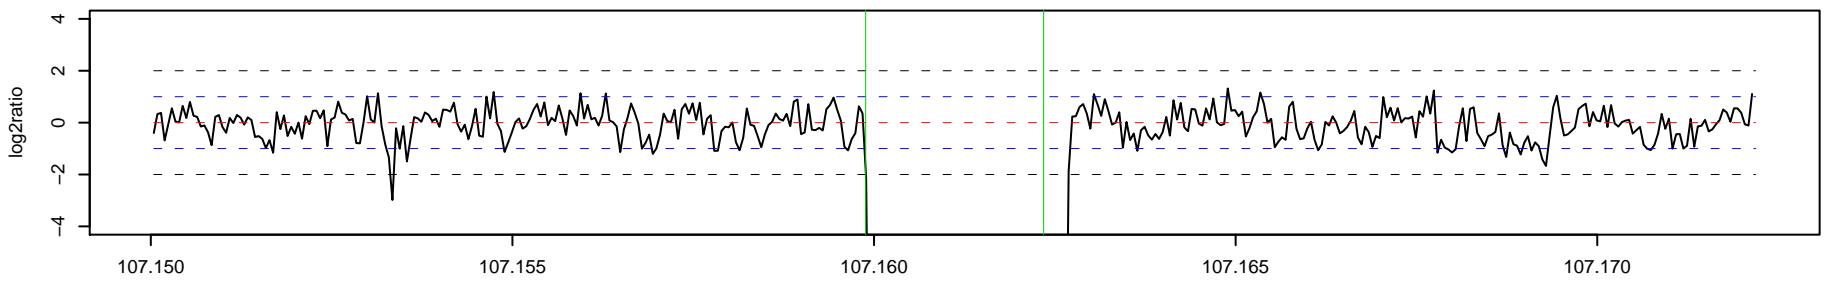

190\_AK1 Chr 4 : 107275887 – 107282753 , 6867 bp (aCGH relative log2ratio= 3.09 )

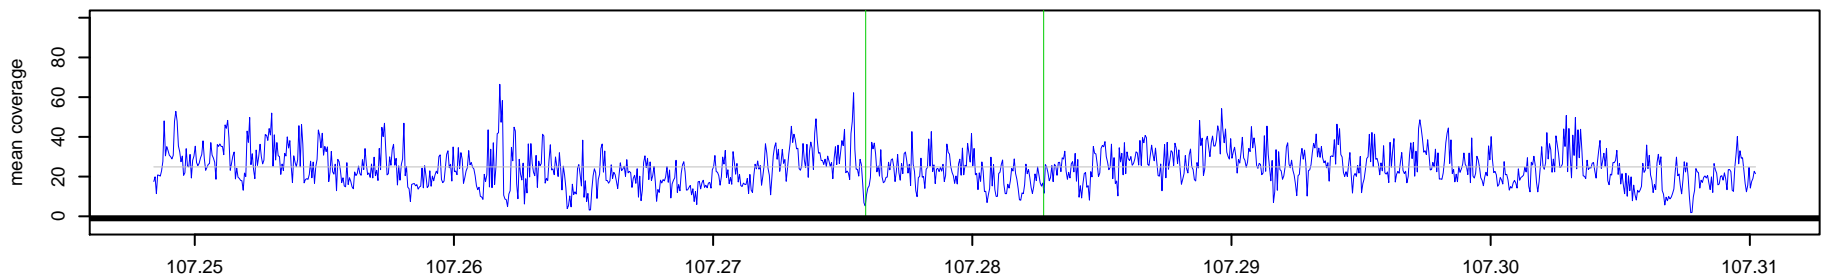

190\_NA10851 Chr 4 : 107275887 – 107282753 , 6867 bp (aCGH relative log2ratio= 3.09 )

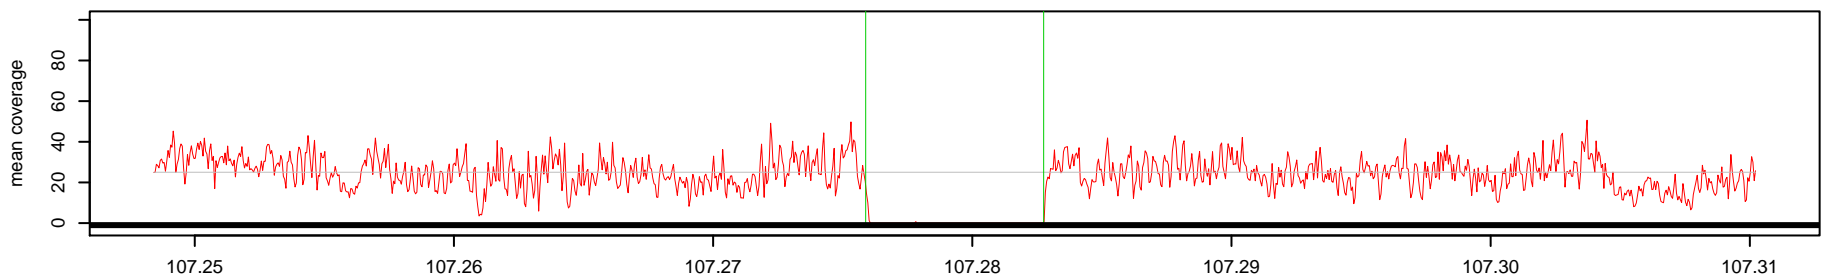

Log2( AK1 read depth / NA10851 read depth)

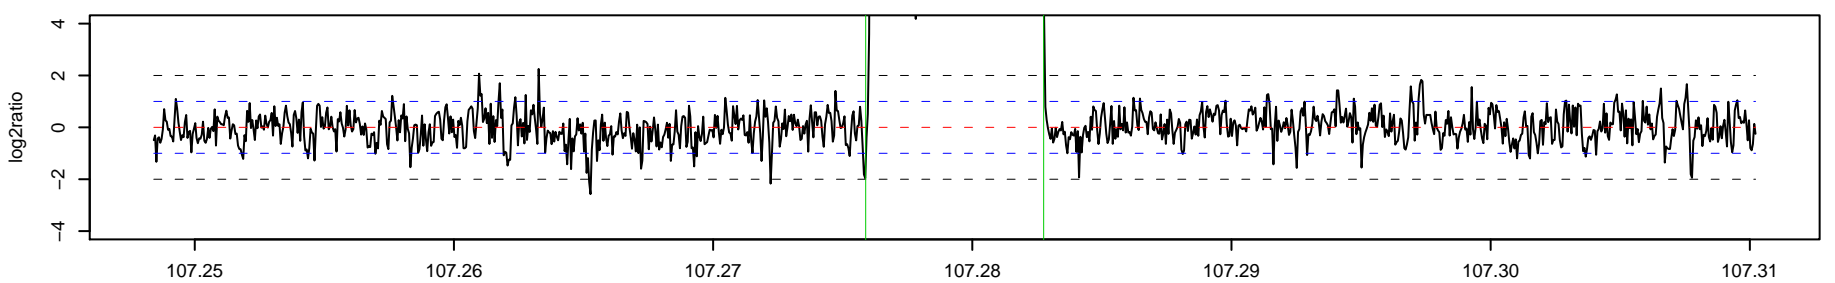

191 \_ AK1 Chr 4 : 109940429 – 109941363 , 935 bp (aCGH relative log2ratio= 0.91 )

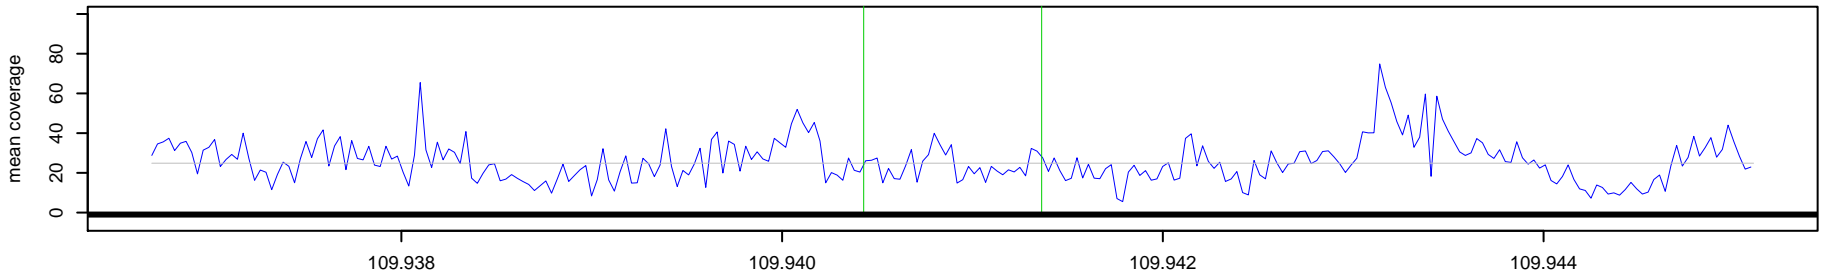

191 \_ NA10851 Chr 4 : 109940429 – 109941363 , 935 bp (aCGH relative log2ratio= 0.91 )

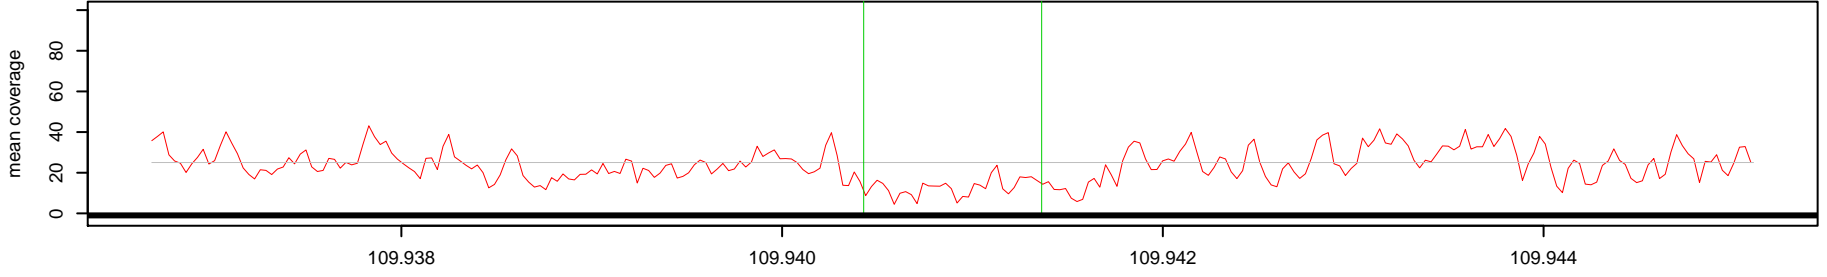

Log2( AK1 read depth / NA10851 read depth)

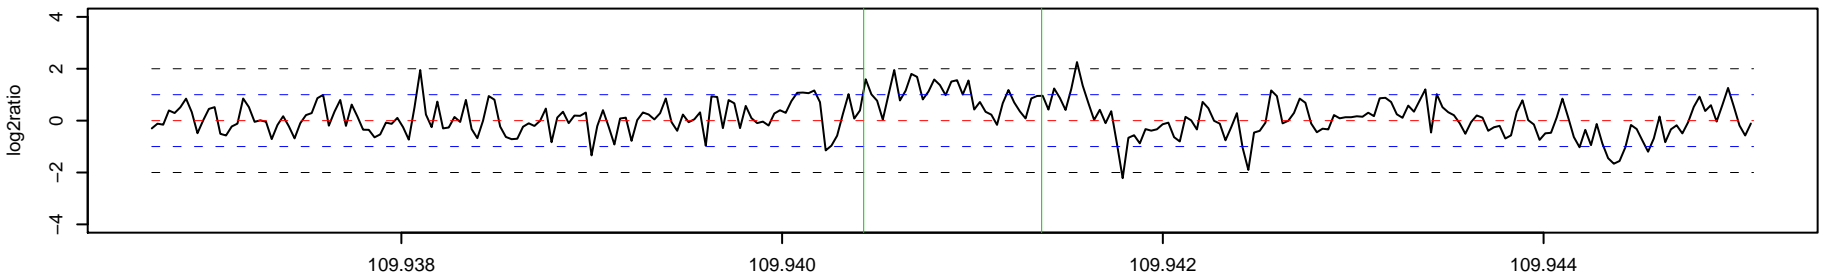

192 \_ AK1 Chr 4 : 115398812 – 115402001 , 3190 bp (aCGH relative log2ratio= 0.81 )

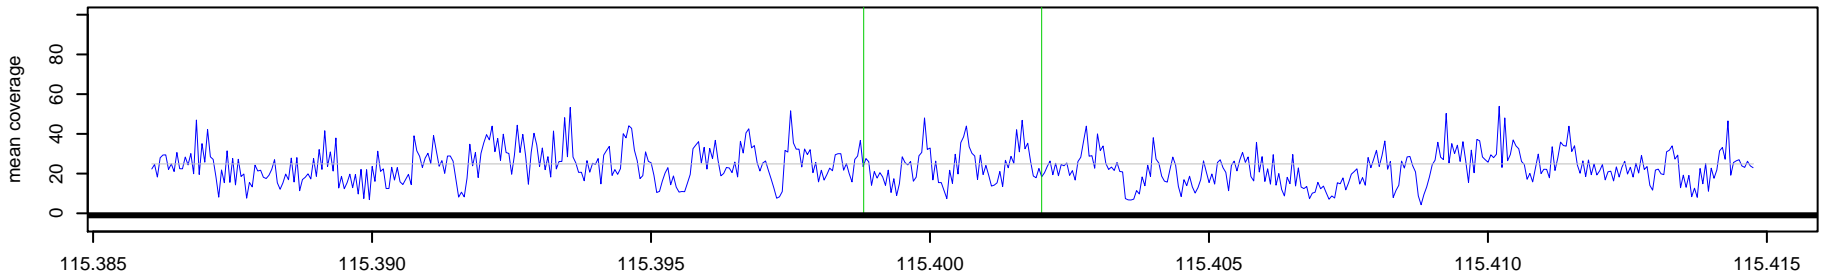

192 \_ NA10851 Chr 4 : 115398812 – 115402001 , 3190 bp (aCGH relative log2ratio= 0.81 )

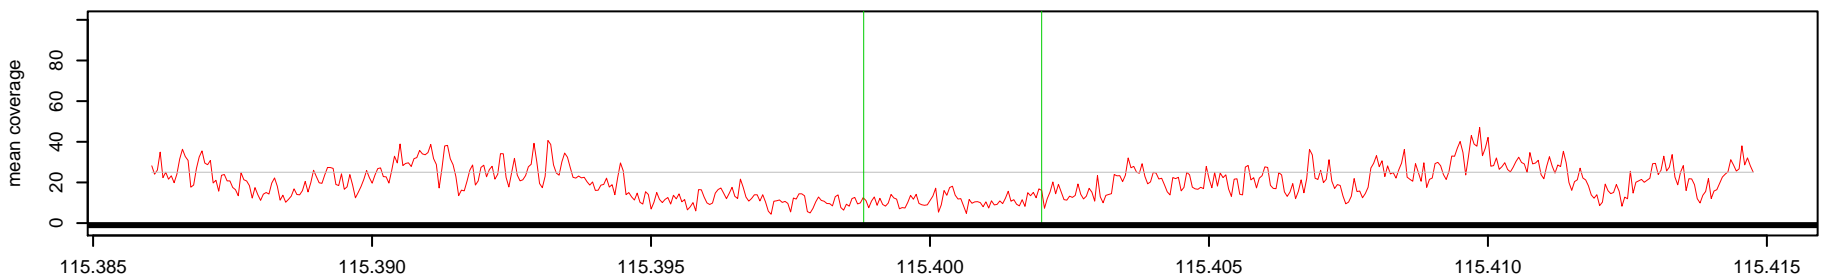

Log2( AK1 read depth / NA10851 read depth)

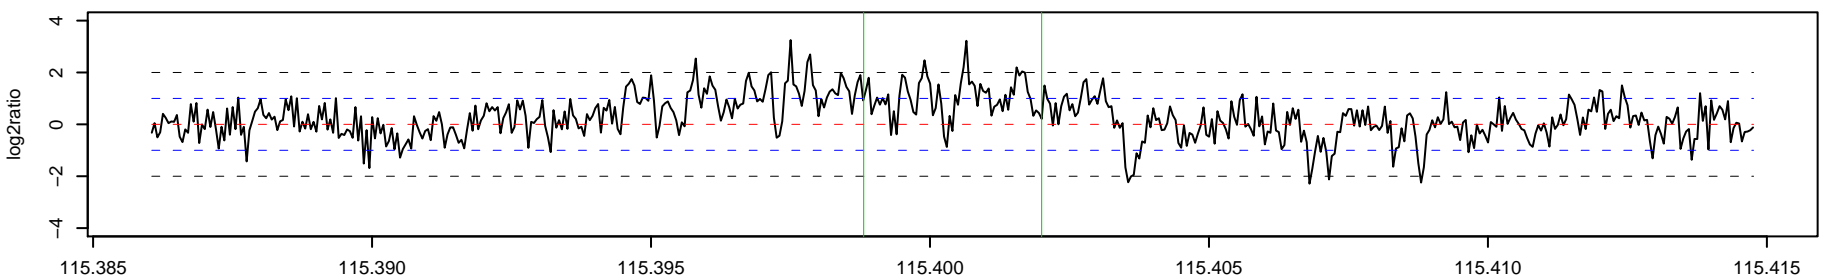

193\_ AK1 Chr 4 : 115727257 – 115728593 , 1337 bp (aCGH relative log2ratio= -0.83 )

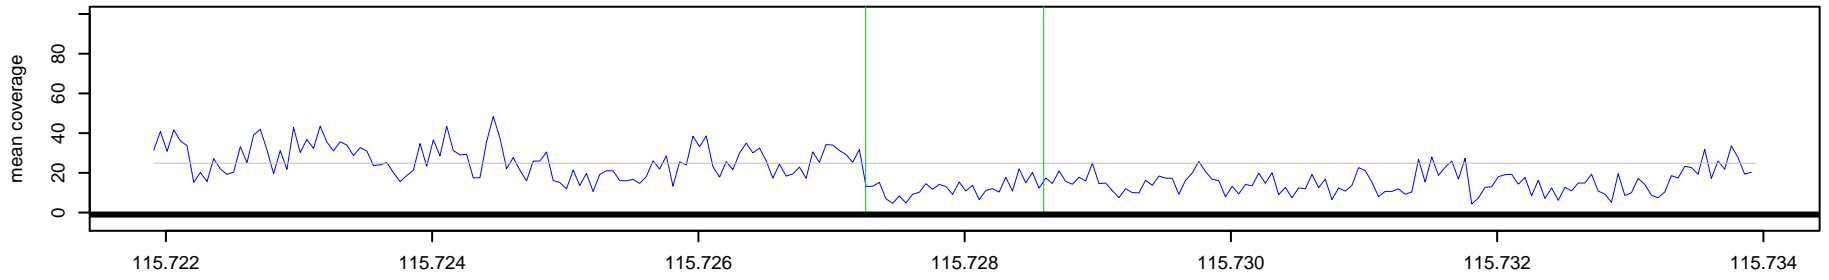

193\_ NA10851 Chr 4 : 115727257 – 115728593 , 1337 bp (aCGH relative log2ratio= -0.83 )

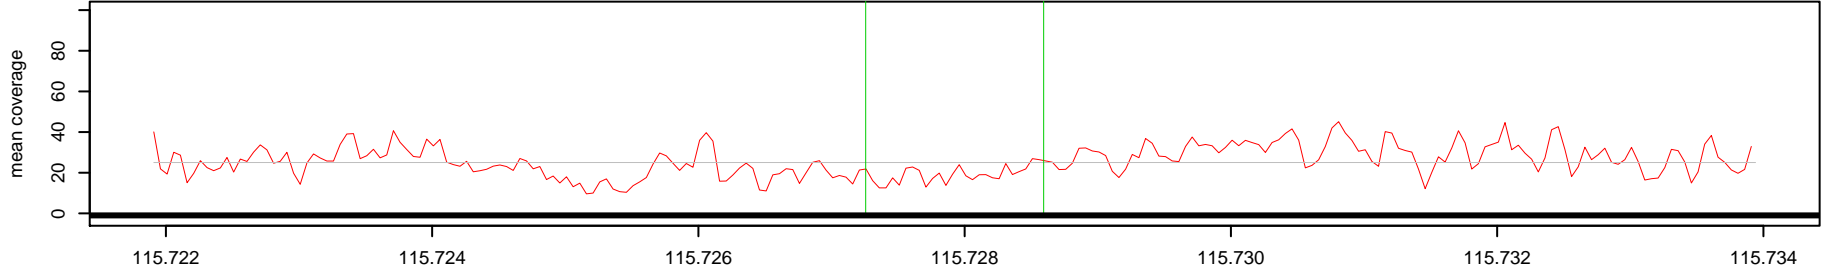

Log2( AK1 read depth / NA10851 read depth)

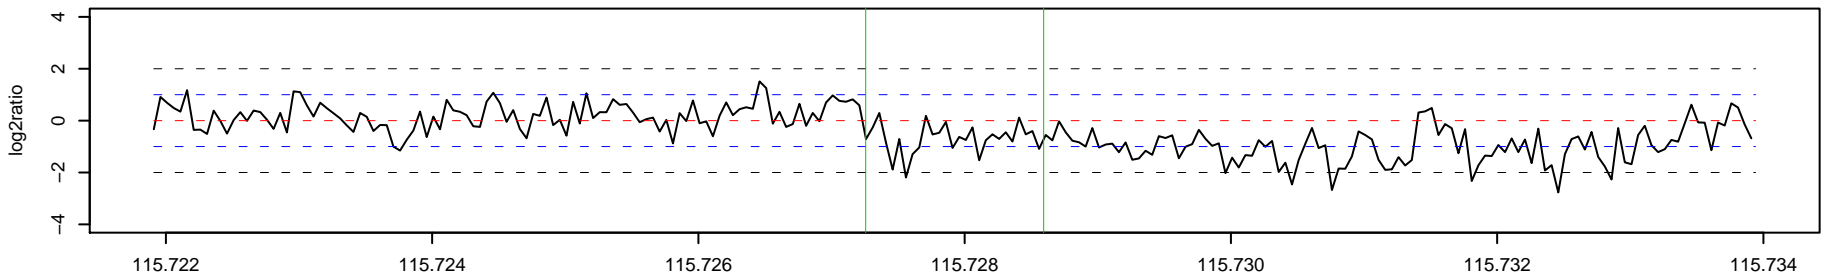

194\_ AK1 Chr 4 : 118542019 – 118542524 , 506 bp (aCGH relative log2ratio= 0.73 )

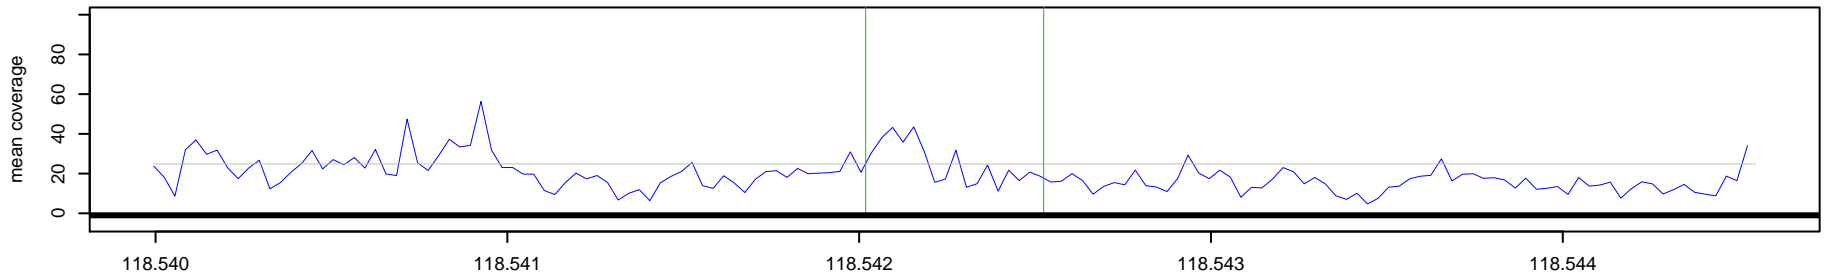

194\_ NA10851 Chr 4 : 118542019 – 118542524 , 506 bp (aCGH relative log2ratio= 0.73 )

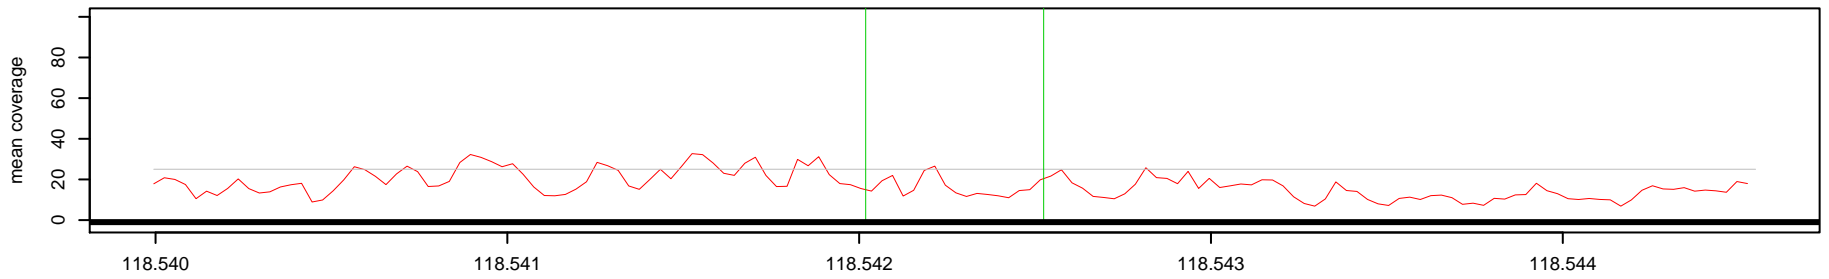

Log2( AK1 read depth / NA10851 read depth)

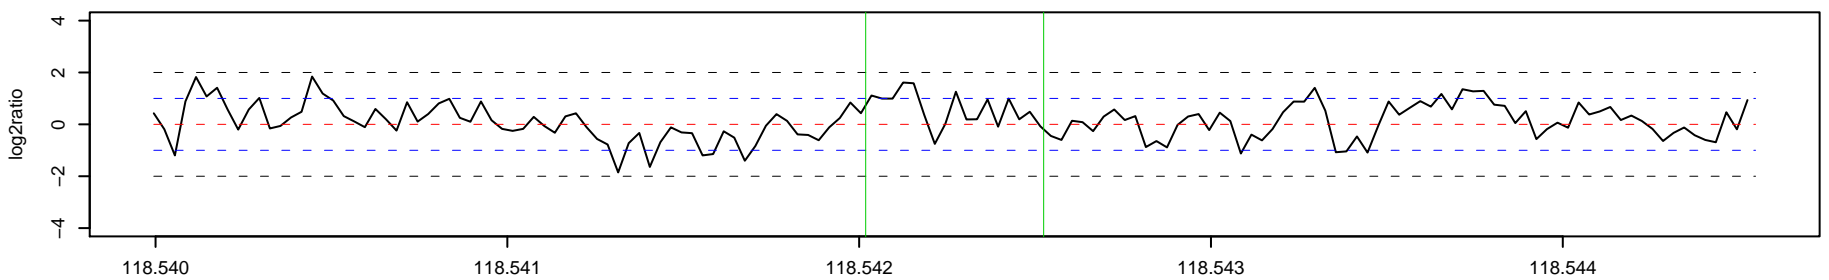

195 \_ AK1 Chr 4 : 119345171 – 119349647 , 4477 bp (aCGH relative log2ratio= -0.88 )

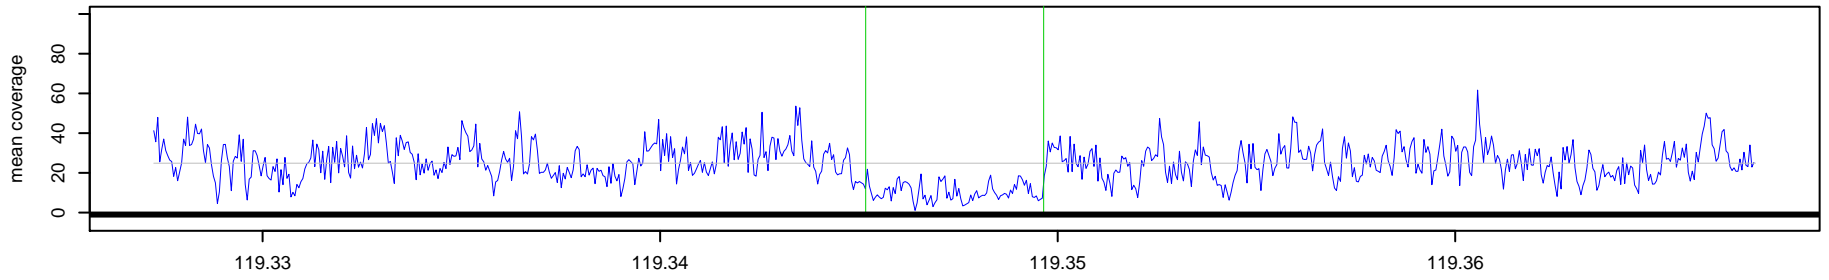

195 \_ NA10851 Chr 4 : 119345171 – 119349647 , 4477 bp (aCGH relative log2ratio= -0.88 )

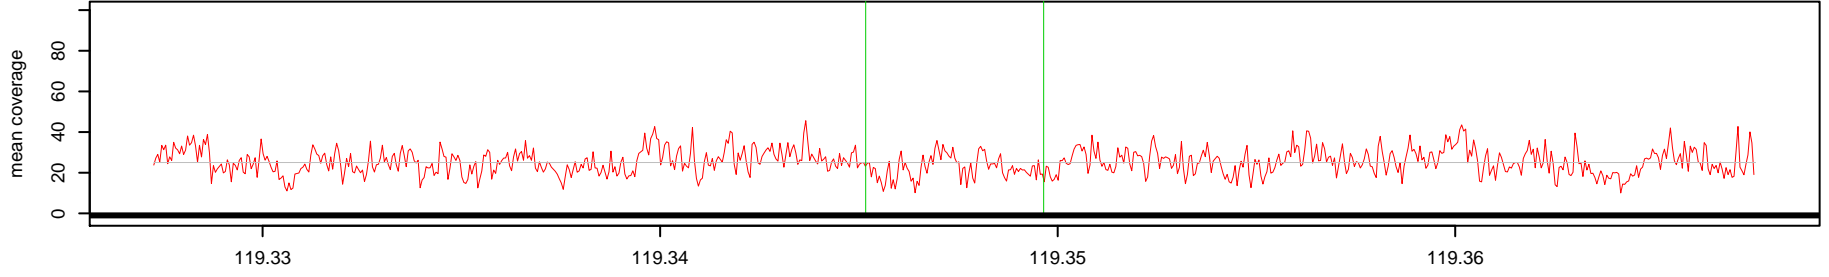

Log2( AK1 read depth / NA10851 read depth)

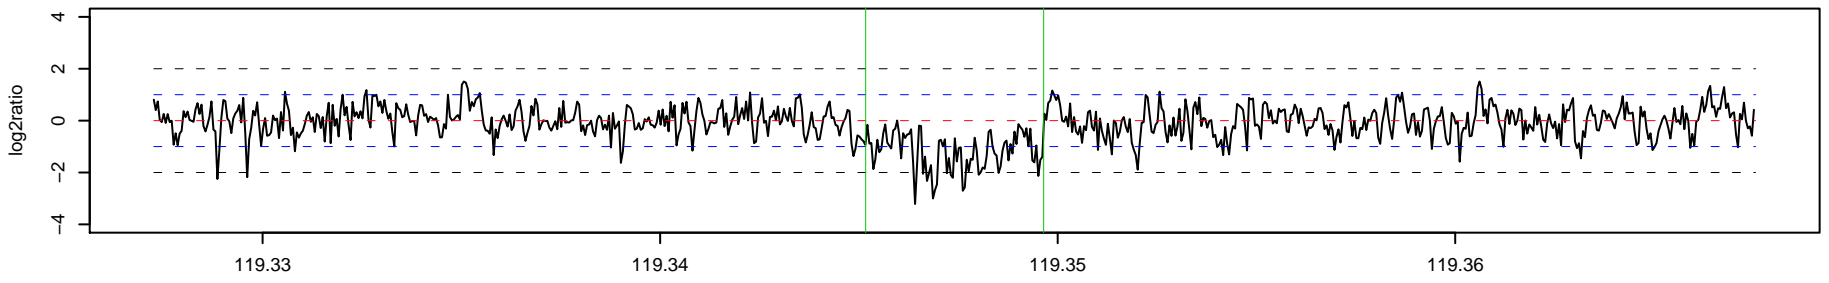

196 \_ AK1 Chr 4 : 133400663 – 133402524 , 1862 bp (aCGH relative log2ratio= -3.53 )

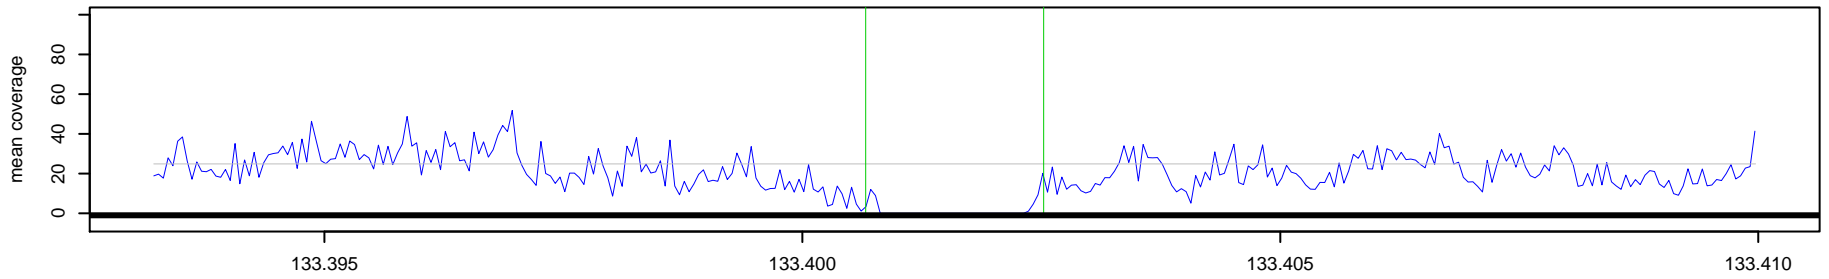

196 \_ NA10851 Chr 4 : 133400663 – 133402524 , 1862 bp (aCGH relative log2ratio= -3.53 )

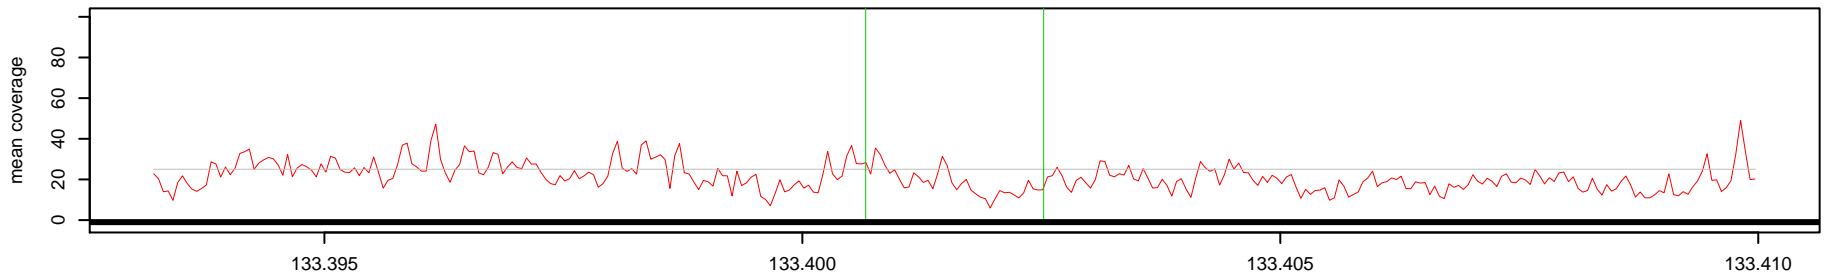

Log2( AK1 read depth / NA10851 read depth)

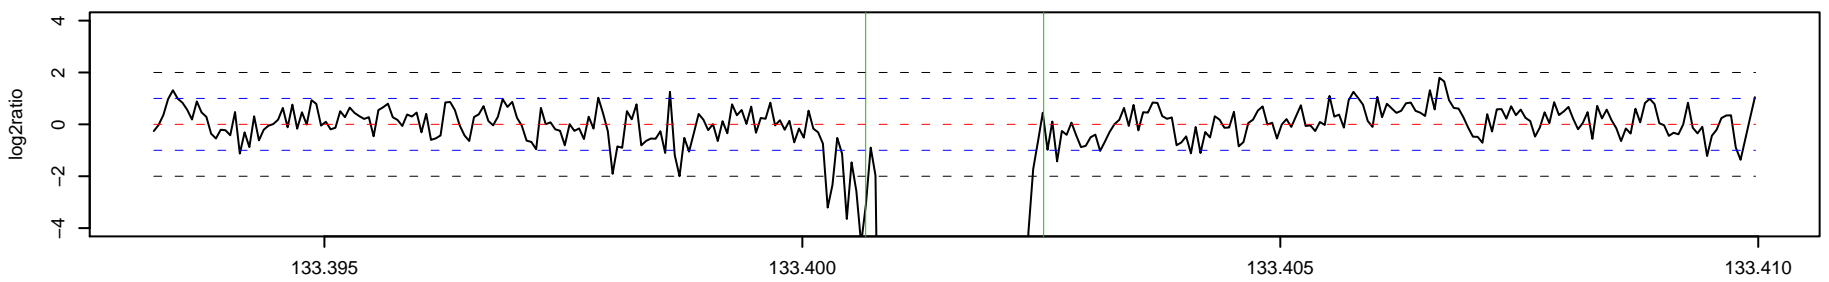

197\_AK1 Chr 4 : 135652436 – 135655086 , 2651 bp (aCGH relative log2ratio= -1.42 )

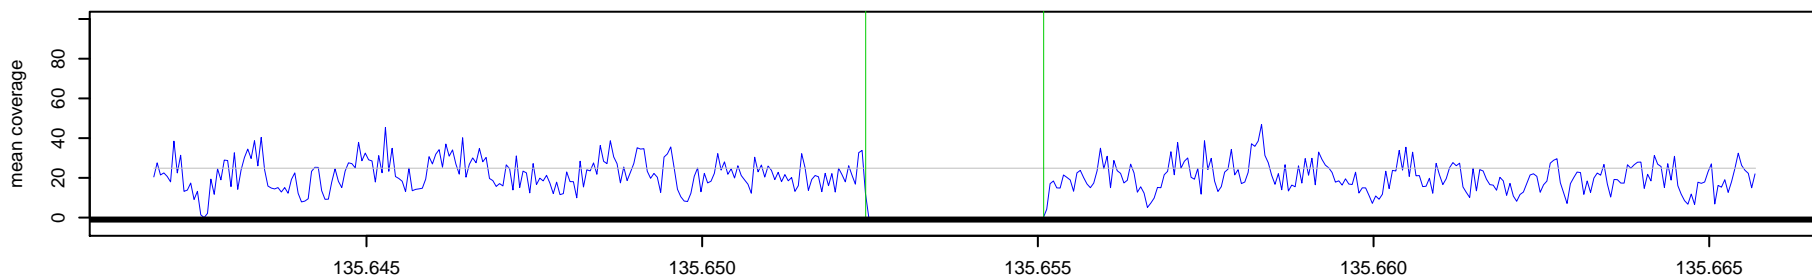

197\_NA10851 Chr 4 : 135652436 – 135655086 , 2651 bp (aCGH relative log2ratio= -1.42 )

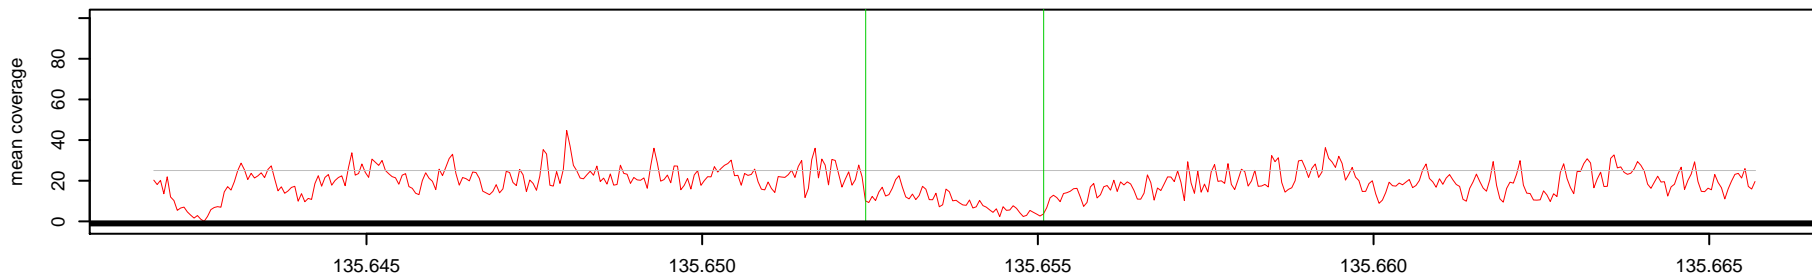

Log2( AK1 read depth / NA10851 read depth)

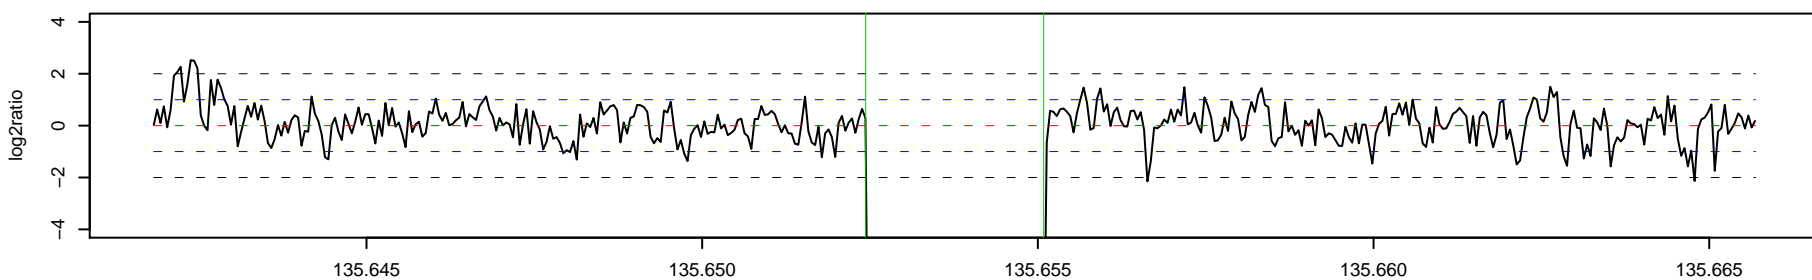

198\_AK1 Chr 4 : 138399629 – 138409979 , 10351 bp (aCGH relative log2ratio= 0.68 )

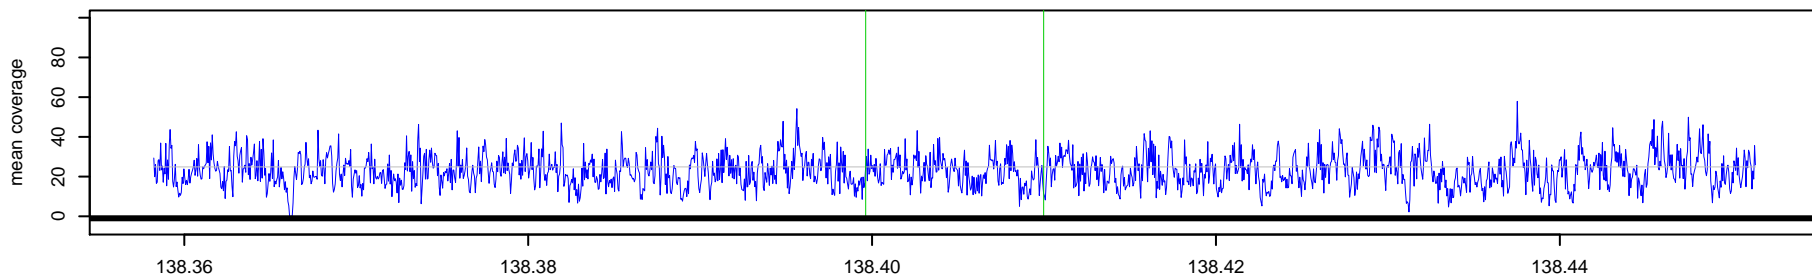

198\_NA10851 Chr 4 : 138399629 – 138409979 , 10351 bp (aCGH relative log2ratio= 0.68 )

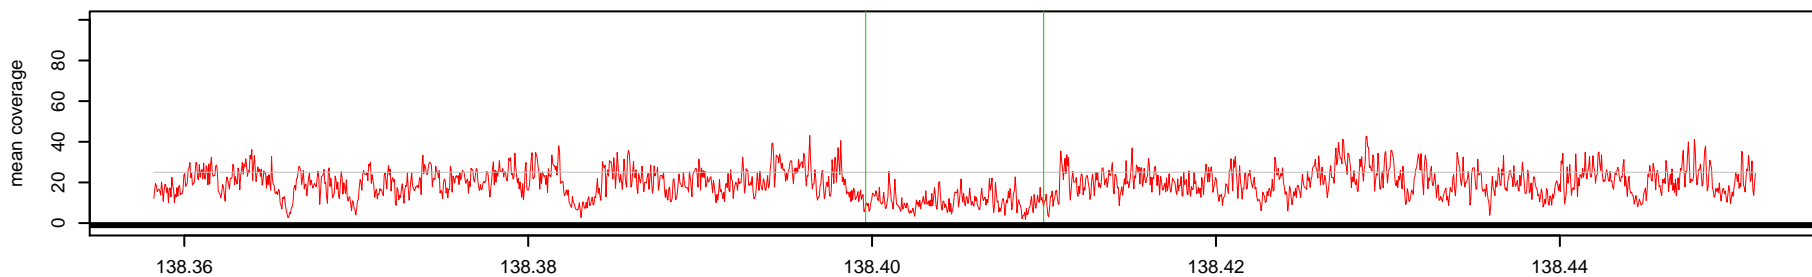

Log2( AK1 read depth / NA10851 read depth)

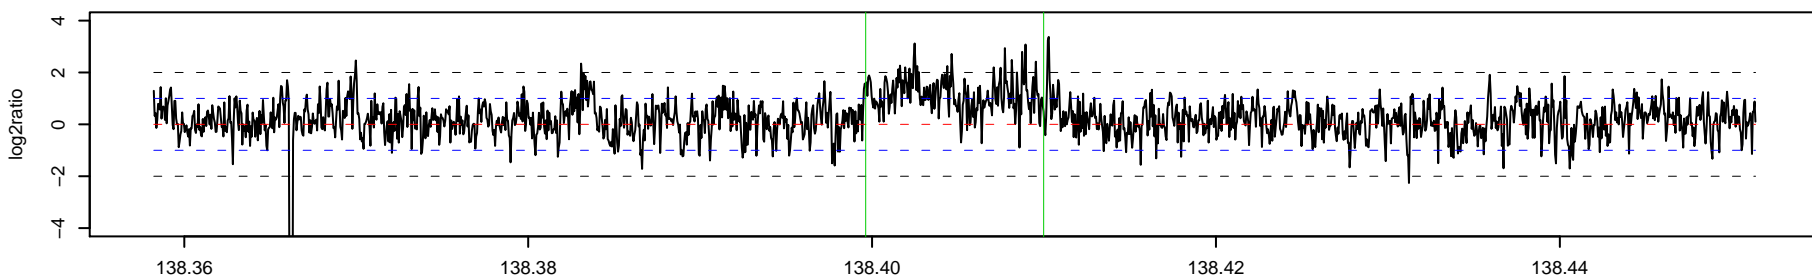

199\_ AK1 Chr 4 : 142450048 – 142452400 , 2353 bp (aCGH relative log2ratio= -0.59 )

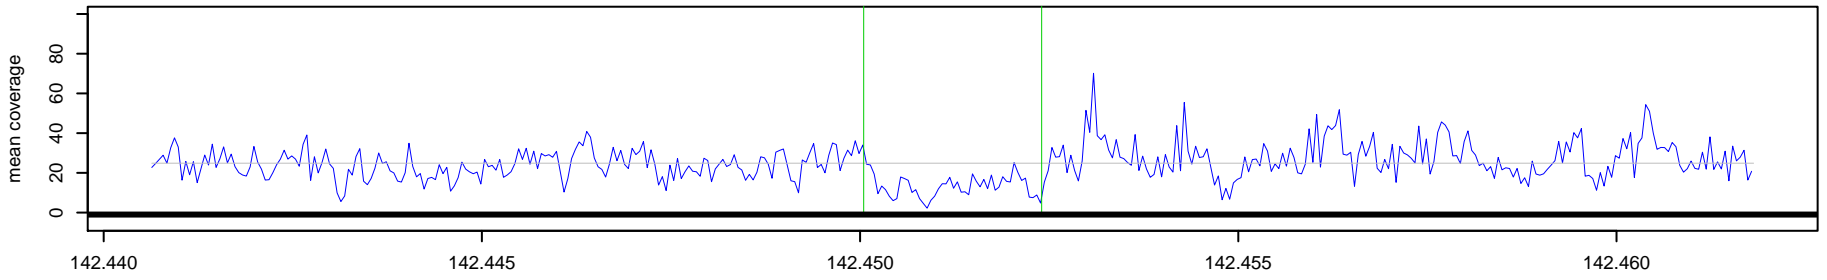

199\_ NA10851 Chr 4 : 142450048 – 142452400 , 2353 bp (aCGH relative log2ratio= -0.59 )

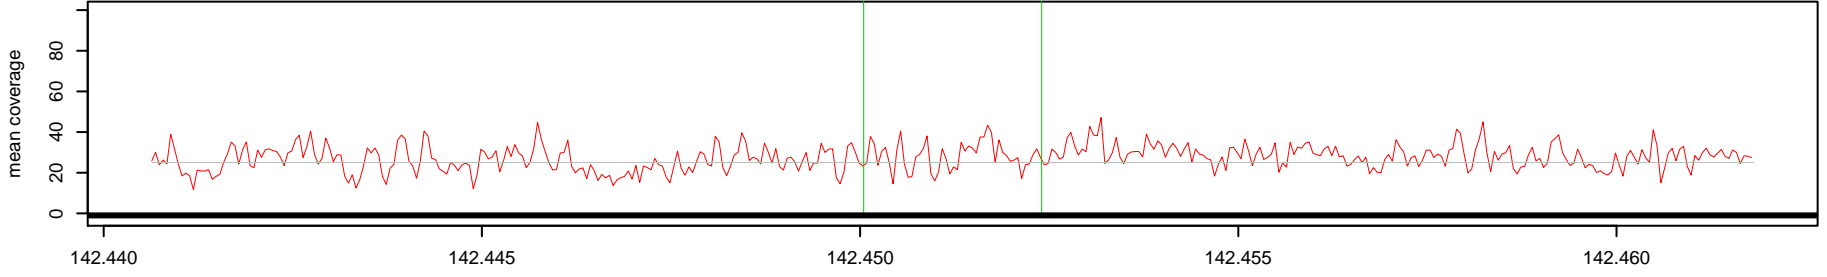

Log2( AK1 read depth / NA10851 read depth)

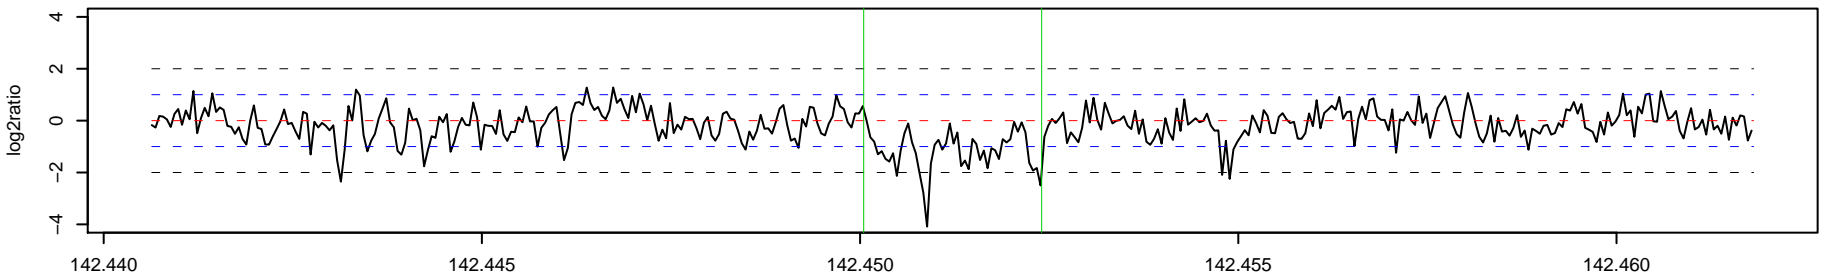

200\_ AK1 Chr 4 : 152997943 – 152998461 , 519 bp (aCGH relative log2ratio= 1.77 )

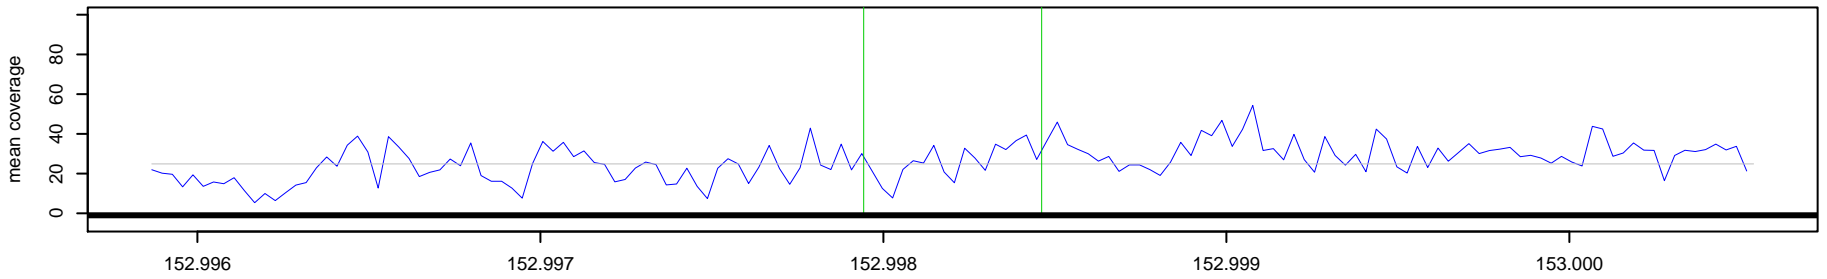

200\_ NA10851 Chr 4 : 152997943 – 152998461 , 519 bp (aCGH relative log2ratio= 1.77 )

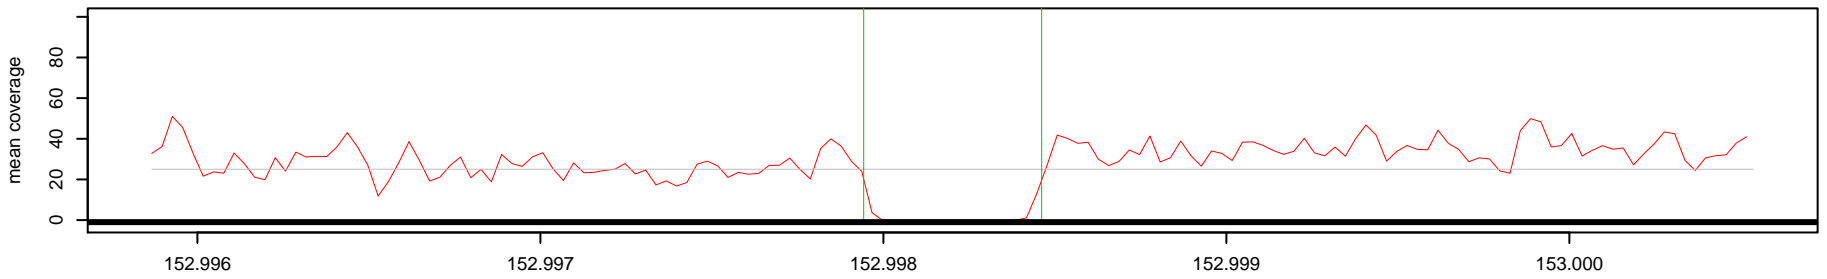

Log2( AK1 read depth / NA10851 read depth)

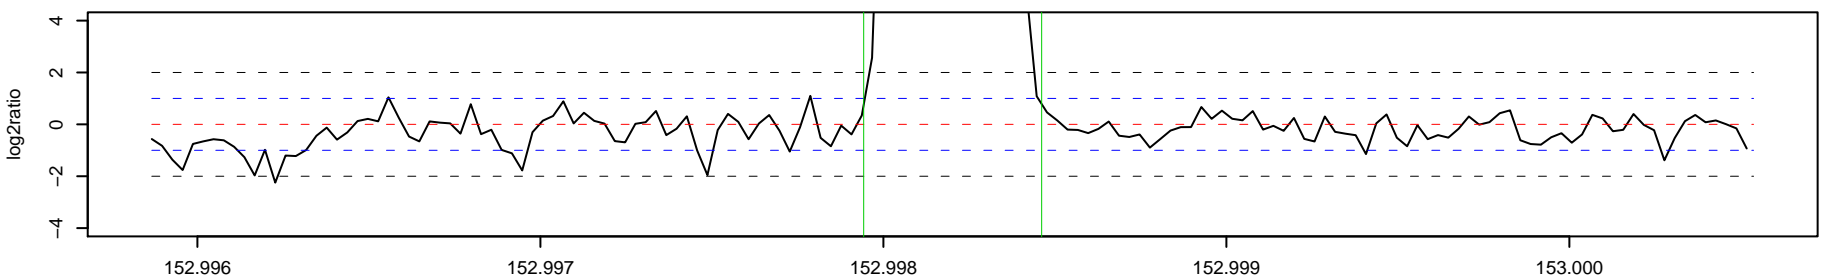



201 \_ AK1 Chr 4 : 162099609 – 162104415 , 4807 bp (aCGH relative log2ratio= -1.50 )

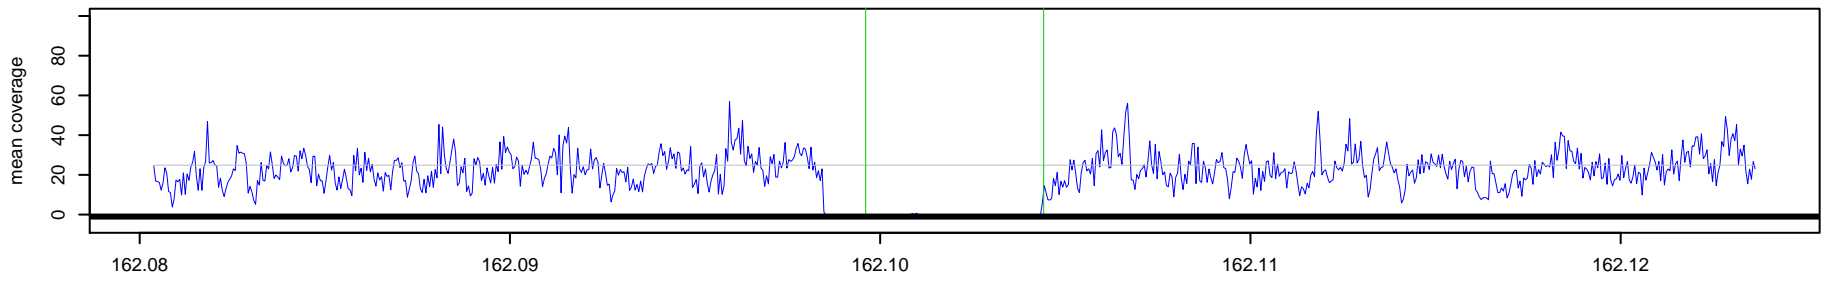

201 \_ NA10851 Chr 4 : 162099609 – 162104415 , 4807 bp (aCGH relative log2ratio= -1.50 )

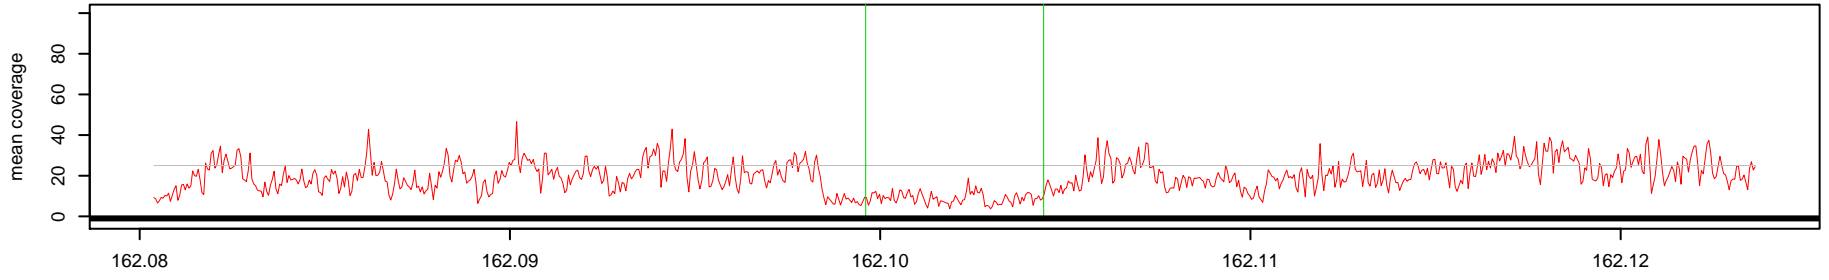

Log2( AK1 read depth / NA10851 read depth)

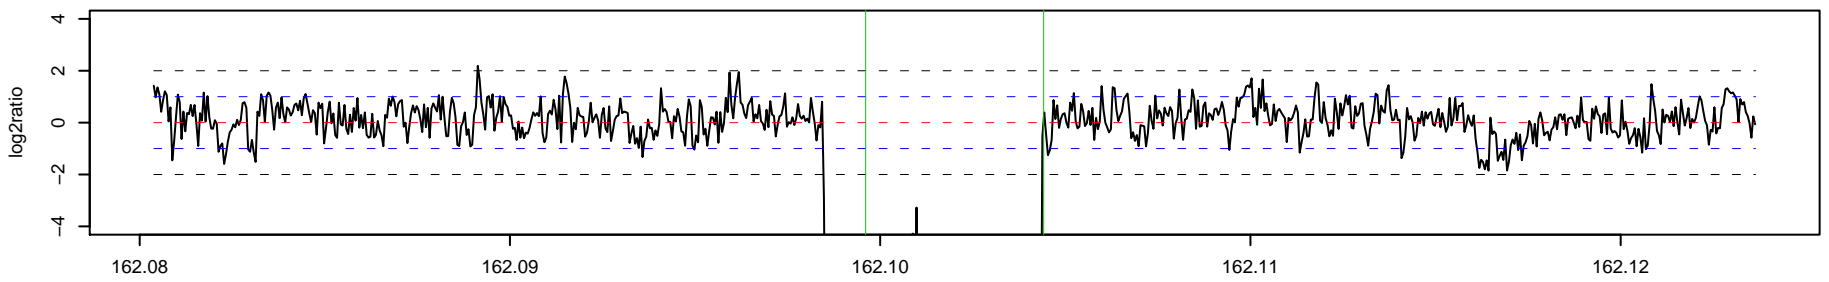

202 \_ AK1 Chr 4 : 162272646 – 162273240 , 595 bp (aCGH relative log2ratio= -1.51 )

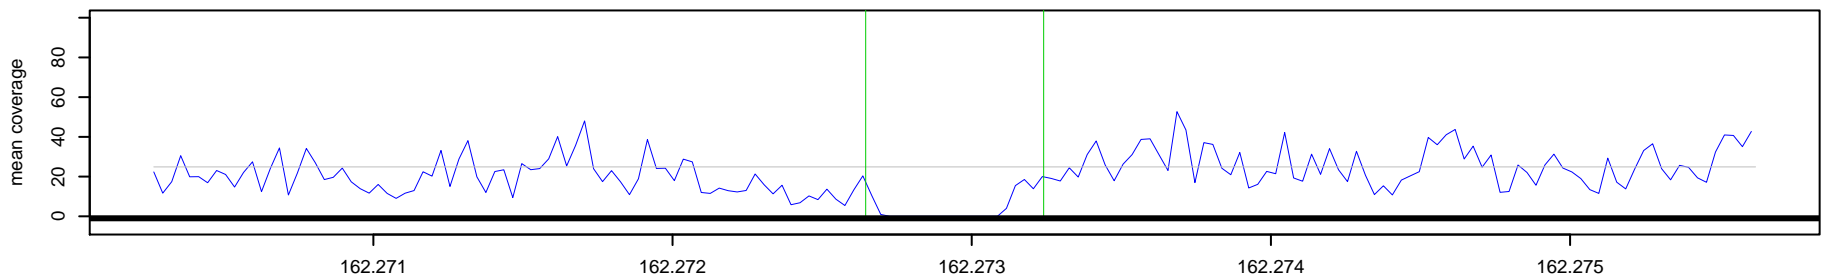

202 \_ NA10851 Chr 4 : 162272646 – 162273240 , 595 bp (aCGH relative log2ratio= -1.51 )

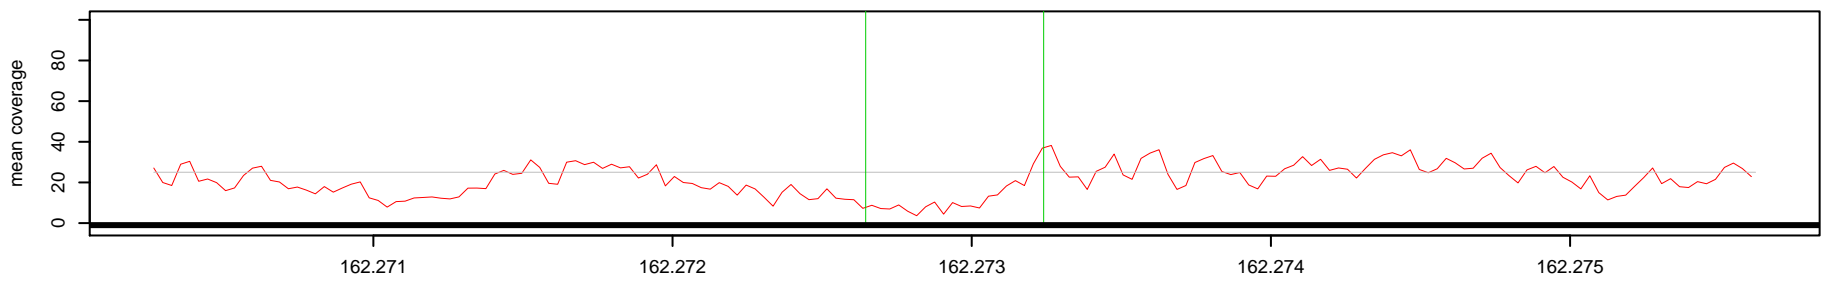

Log2( AK1 read depth / NA10851 read depth)

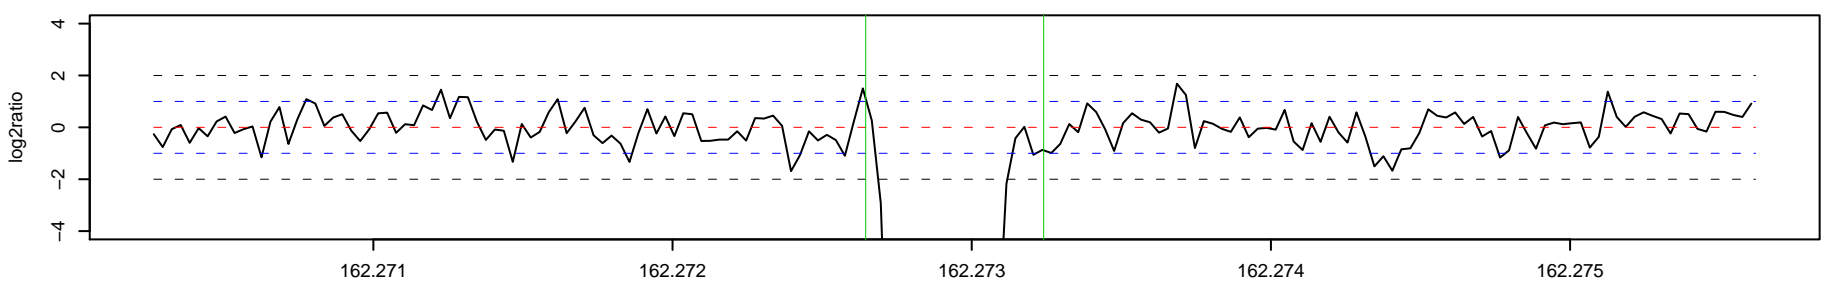

203 \_ AK1 Chr 4 : 165422577 – 165425676 , 3100 bp (aCGH relative log2ratio= 0.62 )

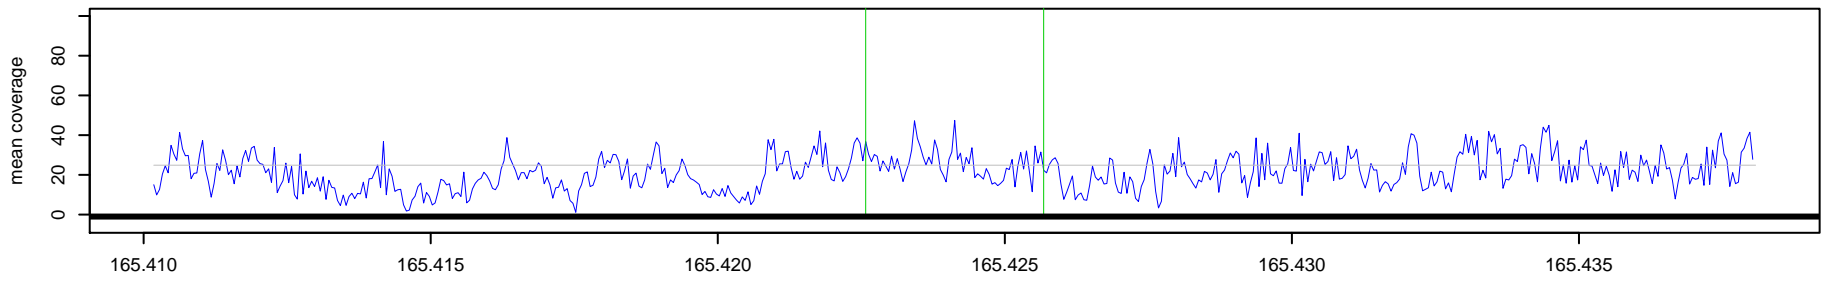

203 \_ NA10851 Chr 4 : 165422577 – 165425676 , 3100 bp (aCGH relative log2ratio= 0.62 )

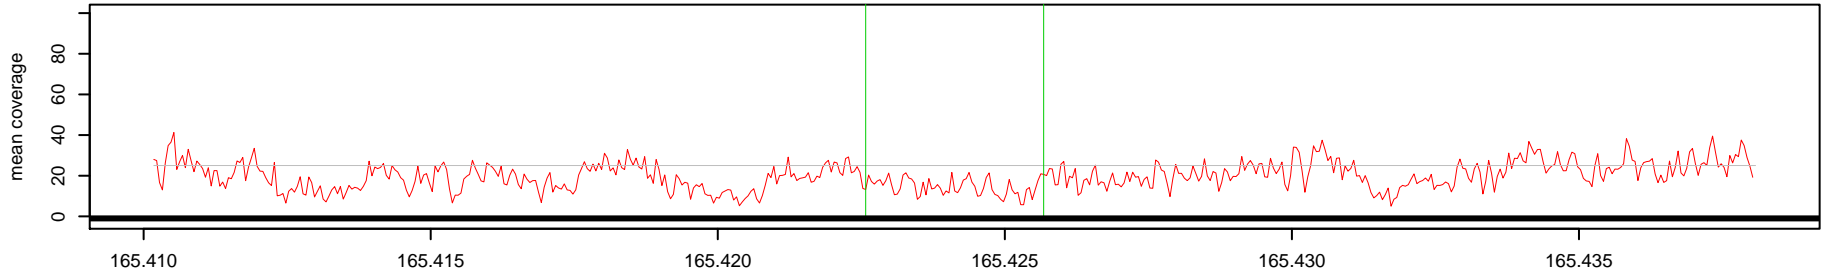

Log2( AK1 read depth / NA10851 read depth)

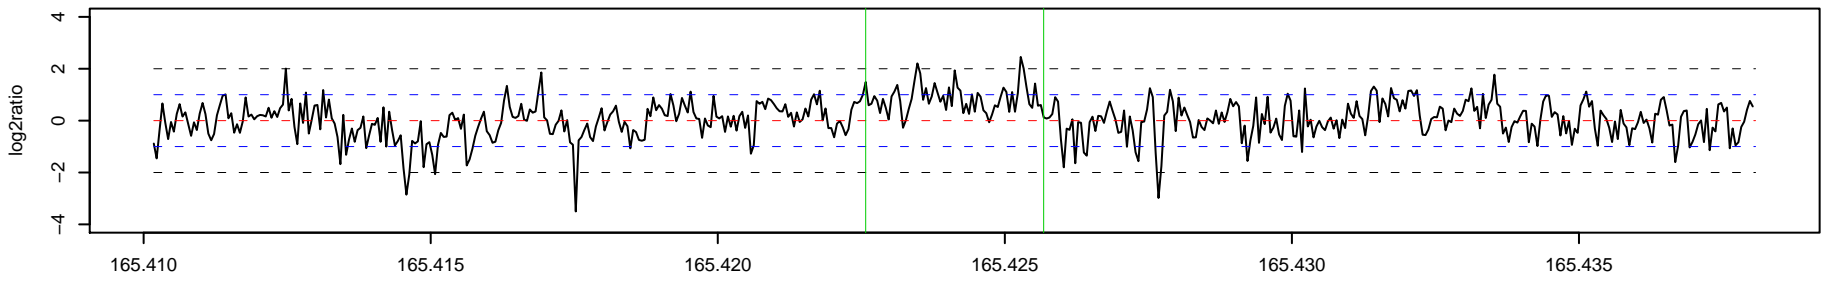

204 \_ AK1 Chr 4 : 169045542 – 169228985 , 183444 bp (aCGH relative log2ratio= 0.67 )

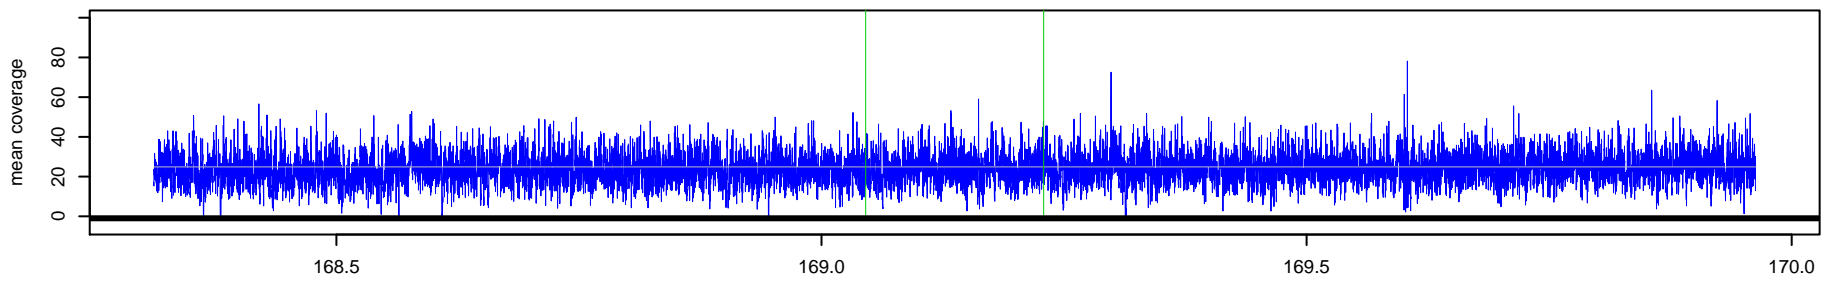

204 \_ NA10851 Chr 4 : 169045542 – 169228985 , 183444 bp (aCGH relative log2ratio= 0.67 )

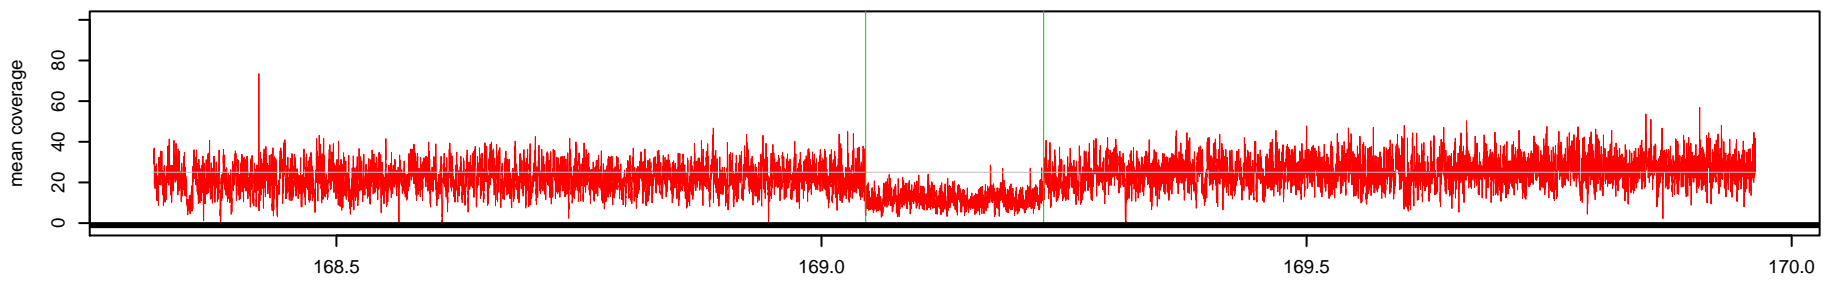

Log2( AK1 read depth / NA10851 read depth)

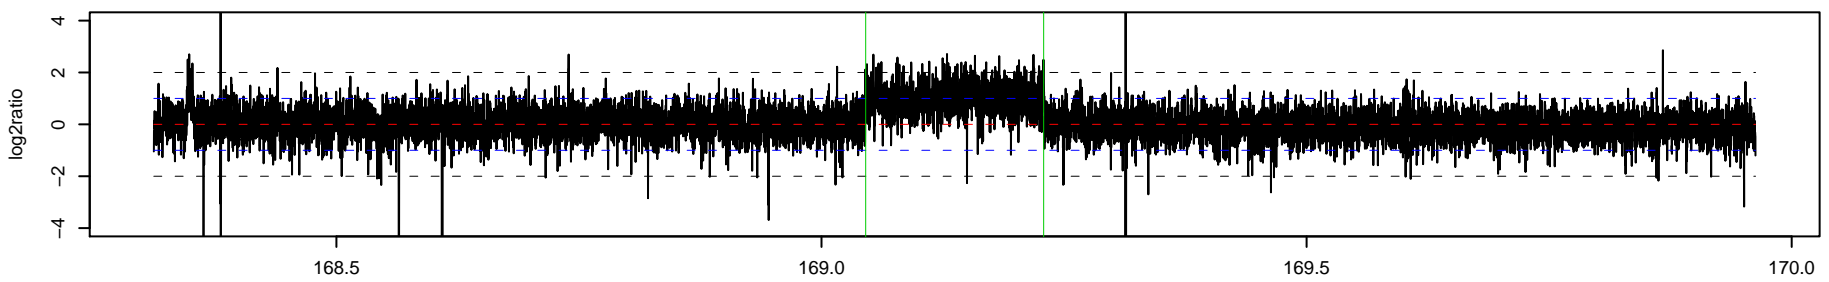

205 \_ AK1 Chr 4 : 172613089 – 172615946 , 2858 bp (aCGH relative log2ratio= -1.13 )

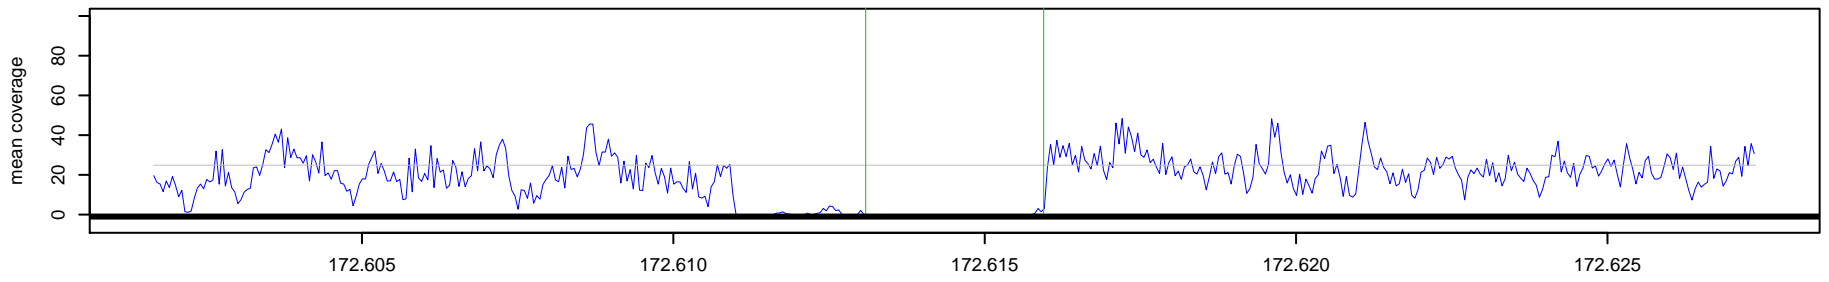

205 \_ NA10851 Chr 4 : 172613089 – 172615946 , 2858 bp (aCGH relative log2ratio= -1.13 )

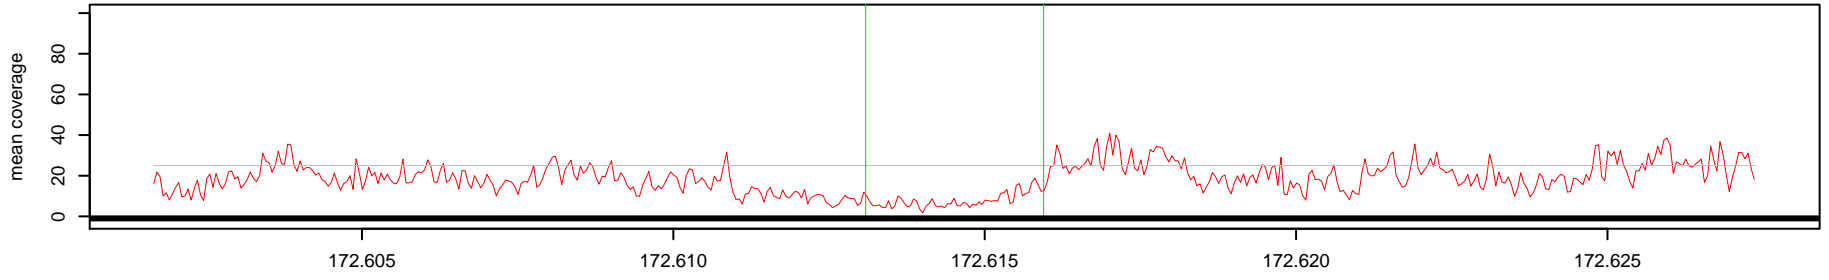

Log2( AK1 read depth / NA10851 read depth)

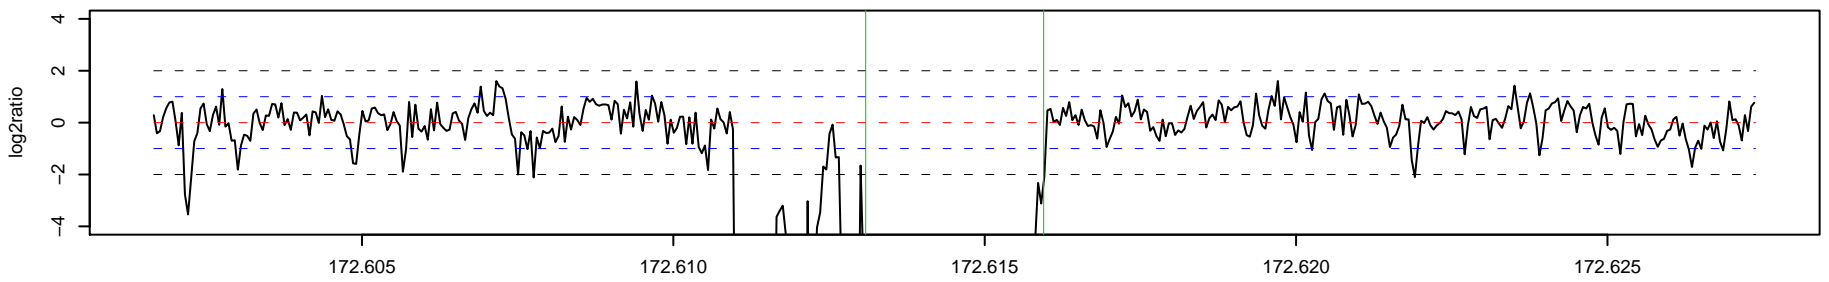

206 \_ AK1 Chr 4 : 173225707 – 173229300 , 3594 bp (aCGH relative log2ratio= -0.73 )

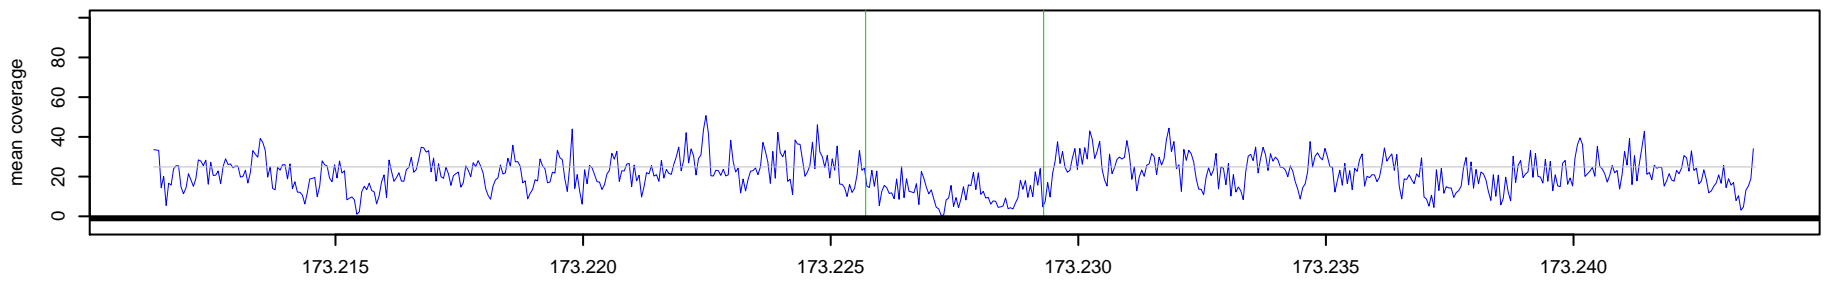

206 \_ NA10851 Chr 4 : 173225707 – 173229300 , 3594 bp (aCGH relative log2ratio= -0.73 )

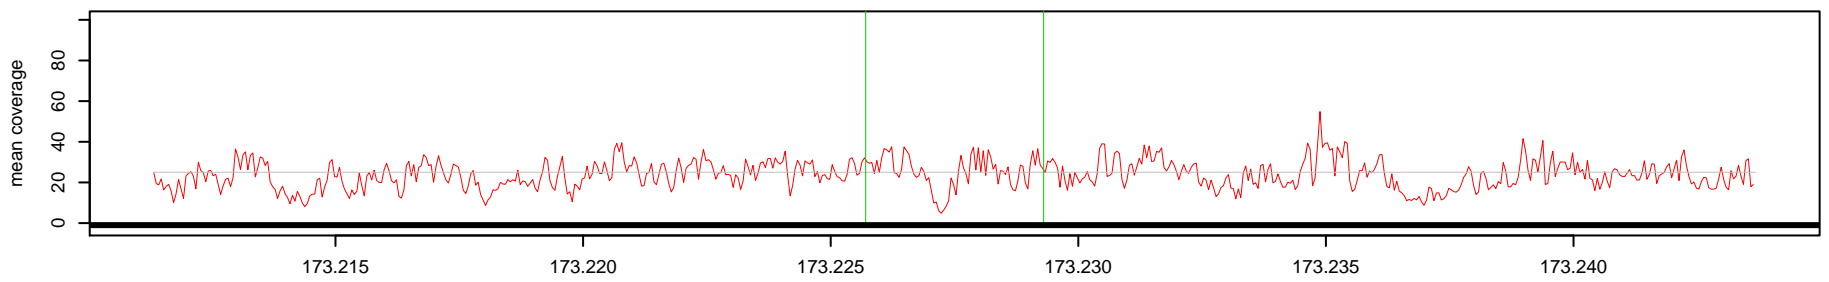

Log2( AK1 read depth / NA10851 read depth)

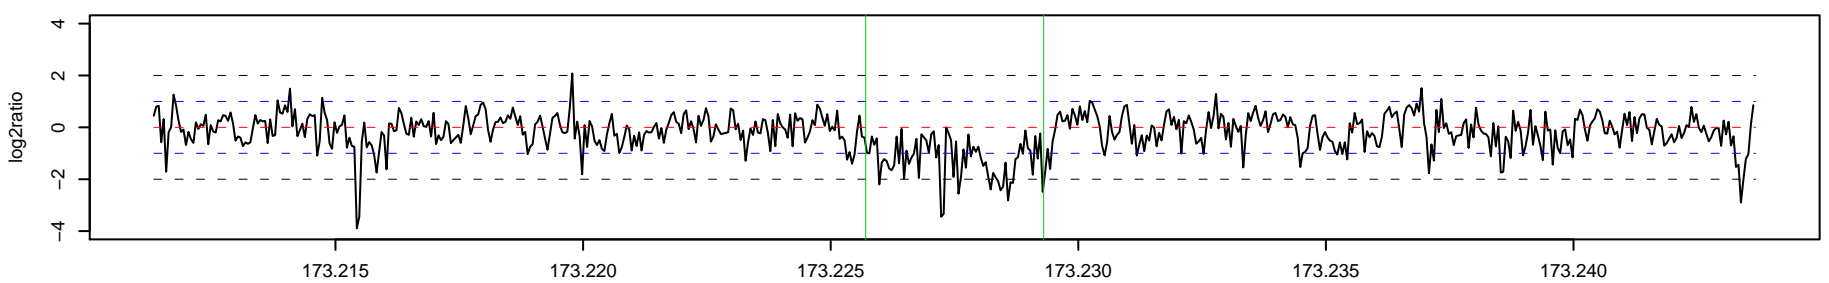

207 \_ AK1 Chr 4 : 173661763 – 173666272 , 4510 bp (aCGH relative log2ratio= -1.43 )

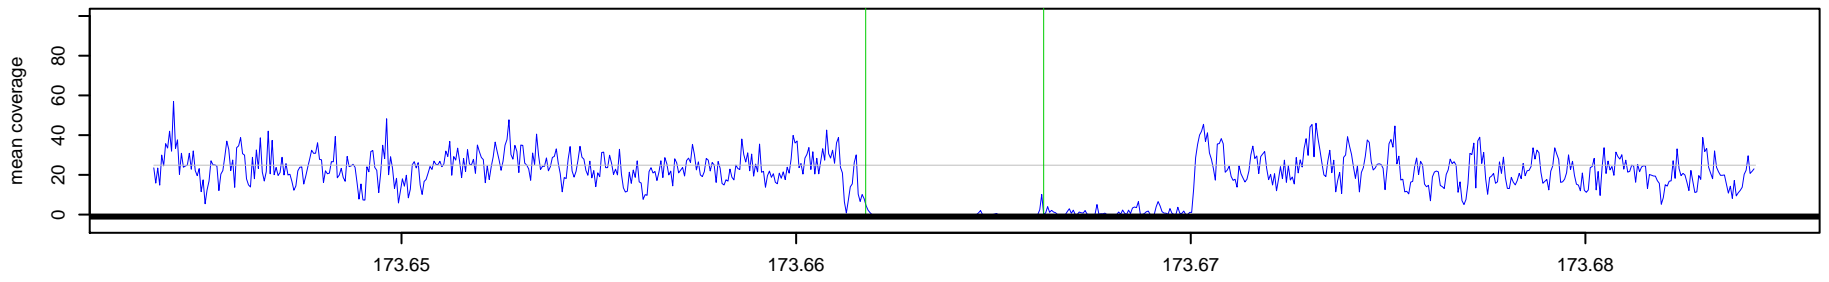

207 \_ NA10851 Chr 4 : 173661763 – 173666272 , 4510 bp (aCGH relative log2ratio= -1.43 )

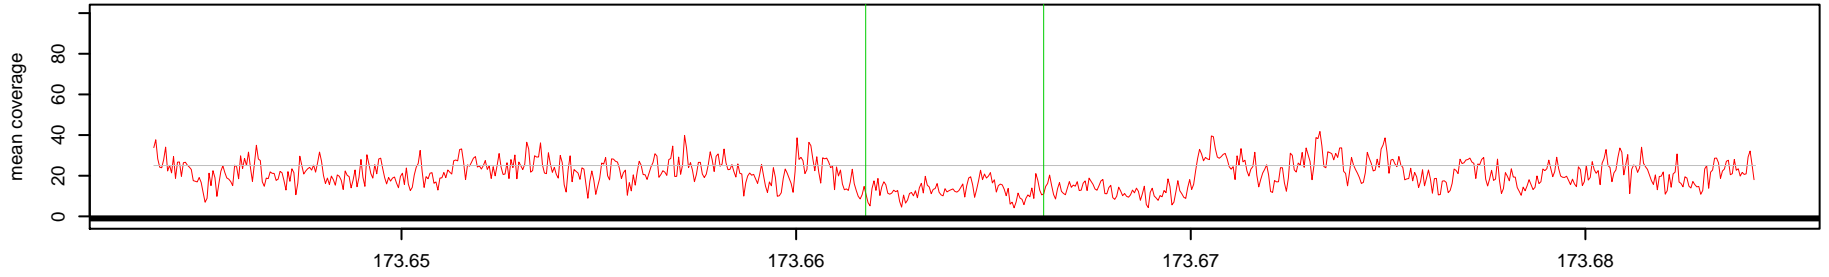

Log2( AK1 read depth / NA10851 read depth)

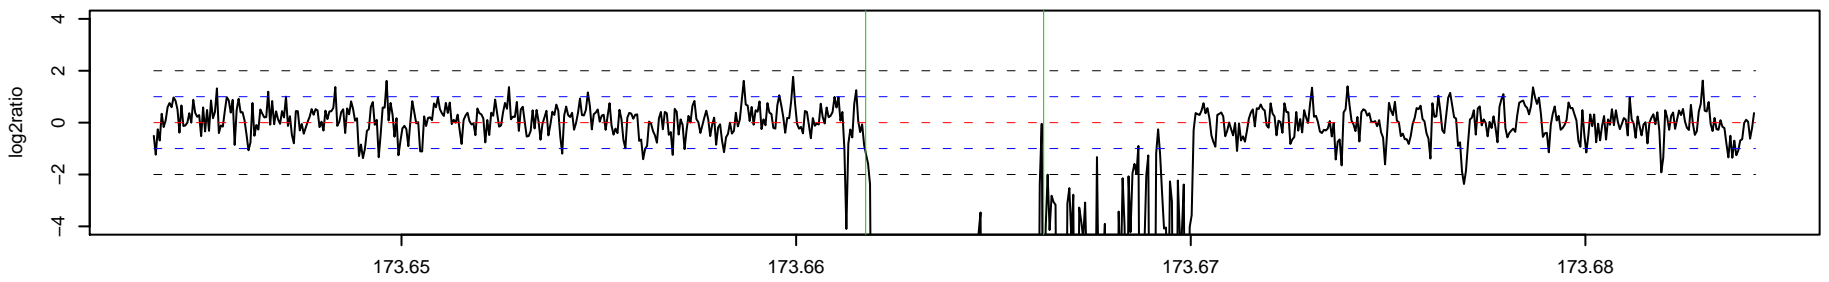

208 \_ AK1 Chr 4 : 181972285 – 181977909 , 5625 bp (aCGH relative log2ratio= 0.71 )

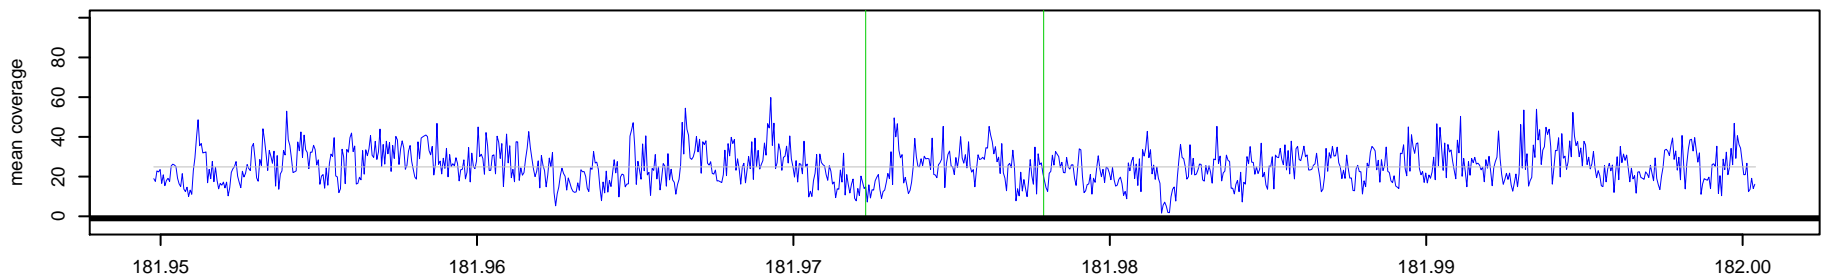

208 \_ NA10851 Chr 4 : 181972285 – 181977909 , 5625 bp (aCGH relative log2ratio= 0.71 )

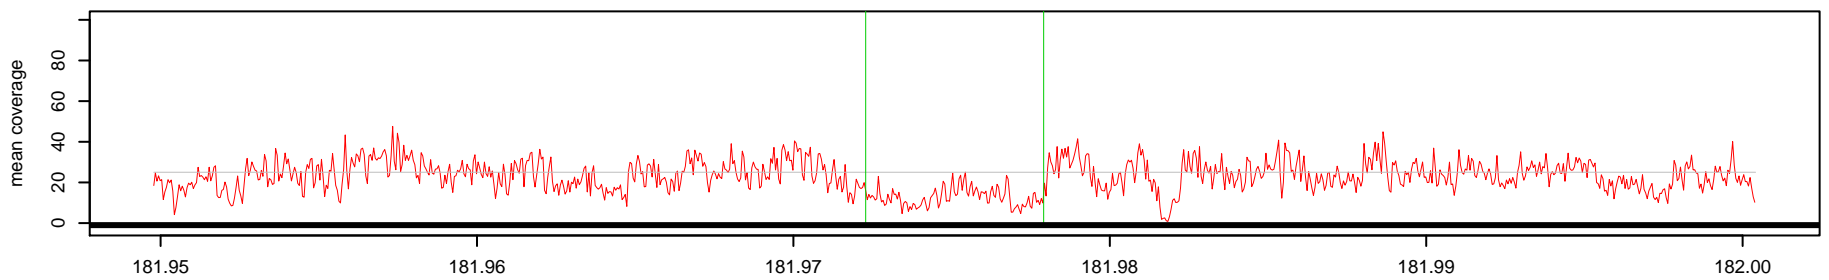

Log2( AK1 read depth / NA10851 read depth)

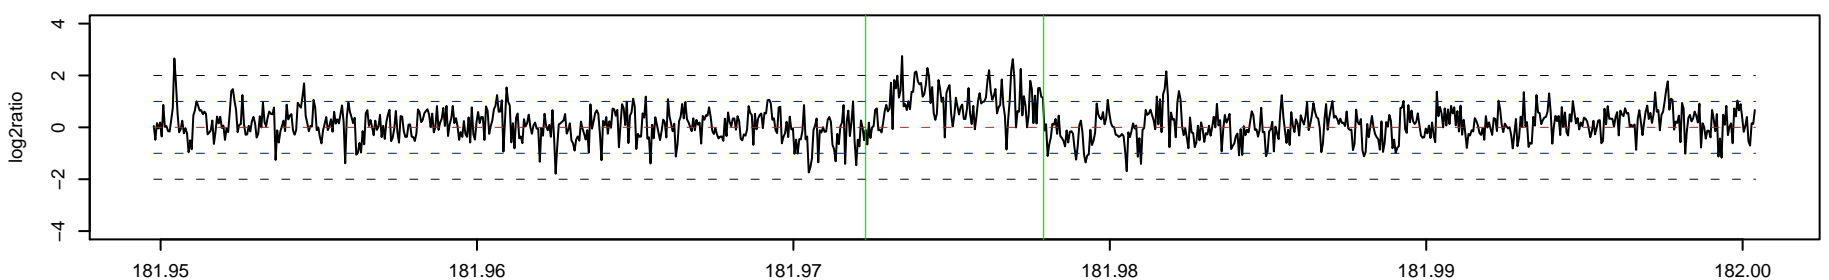

209 \_ AK1 Chr 4 : 182293521 – 182294127 , 607 bp (aCGH relative log2ratio= -0.59 )

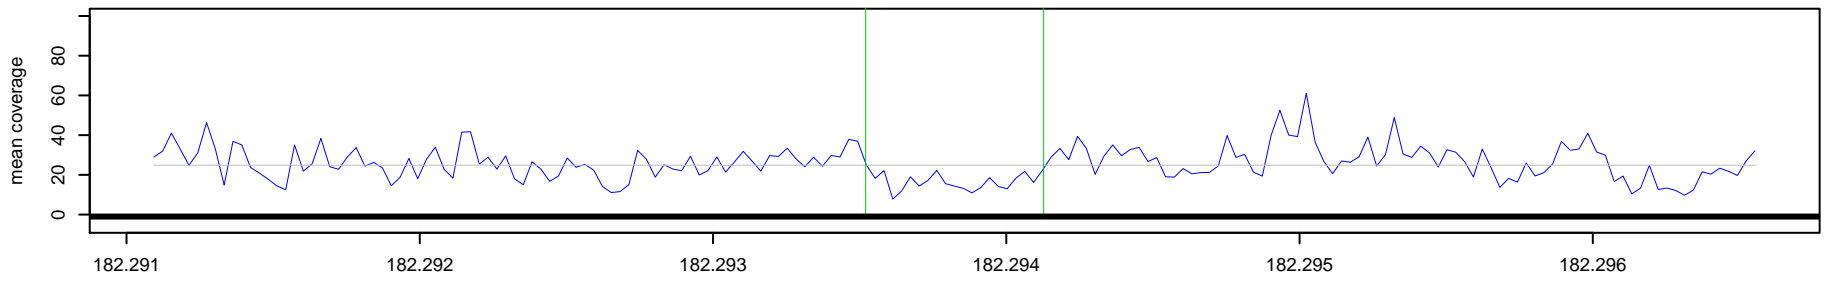

209 \_ NA10851 Chr 4 : 182293521 – 182294127 , 607 bp (aCGH relative log2ratio= -0.59 )

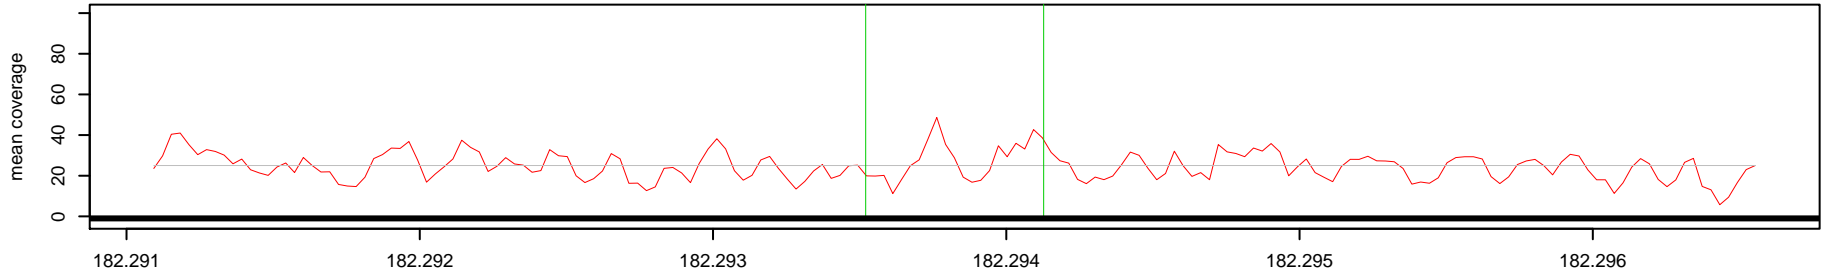

Log2( AK1 read depth / NA10851 read depth)

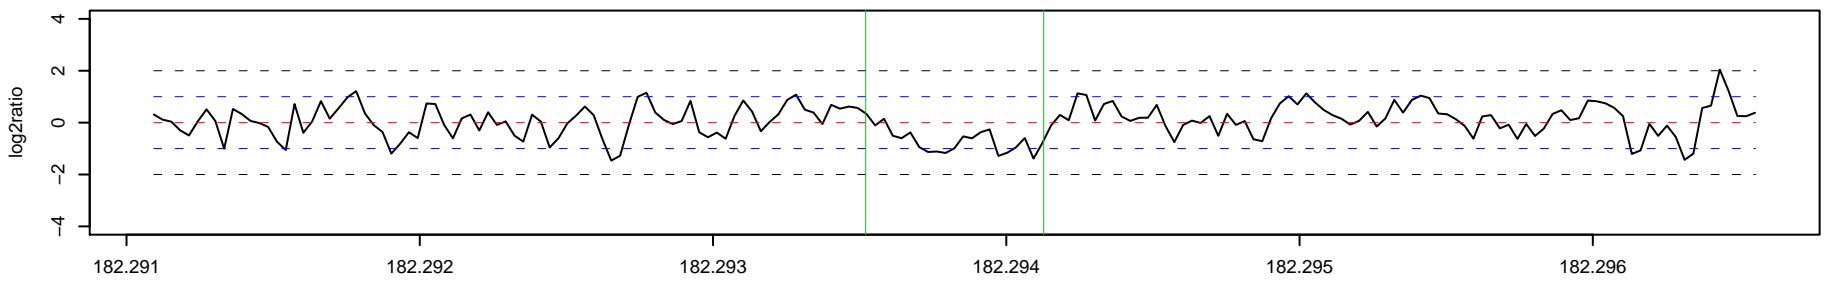

210 \_ AK1 Chr 4 : 185395404 – 185405293 , 9890 bp (aCGH relative log2ratio= 0.58 )

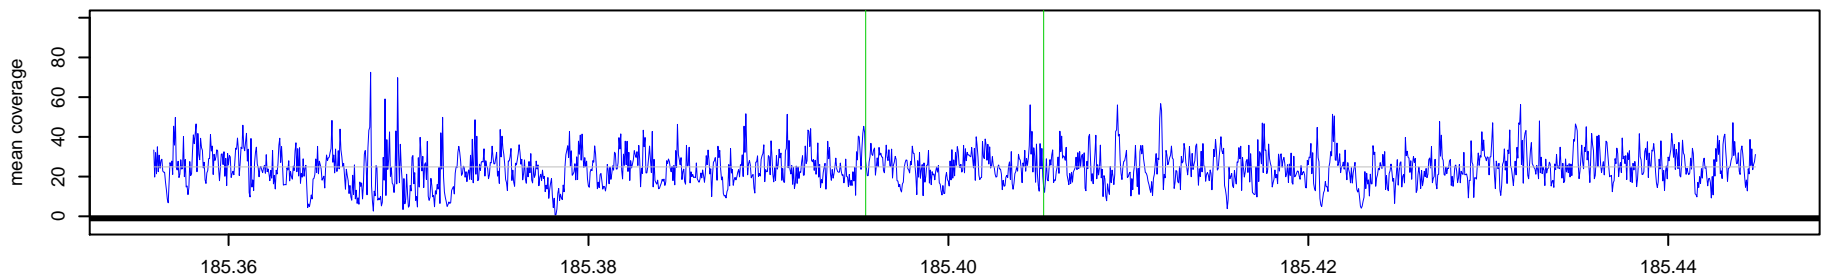

210 \_ NA10851 Chr 4 : 185395404 – 185405293 , 9890 bp (aCGH relative log2ratio= 0.58 )

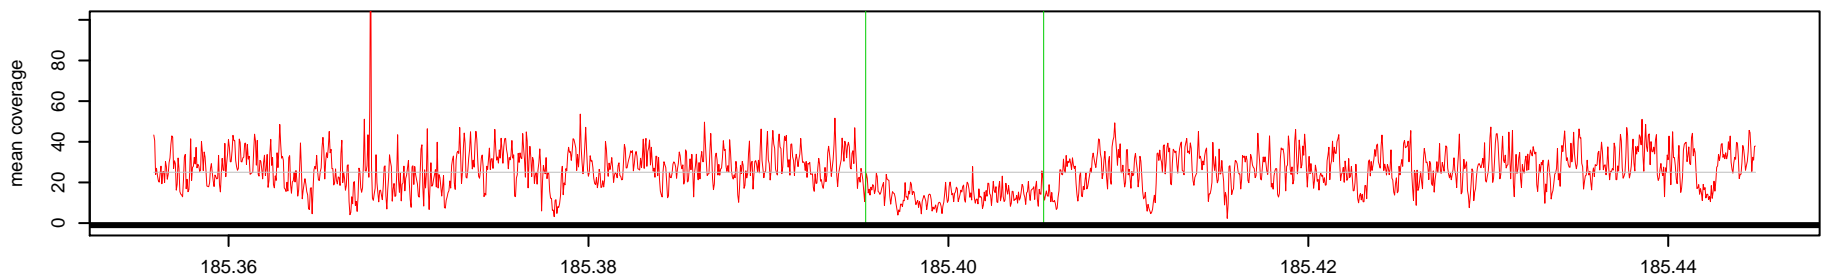

Log2( AK1 read depth / NA10851 read depth)

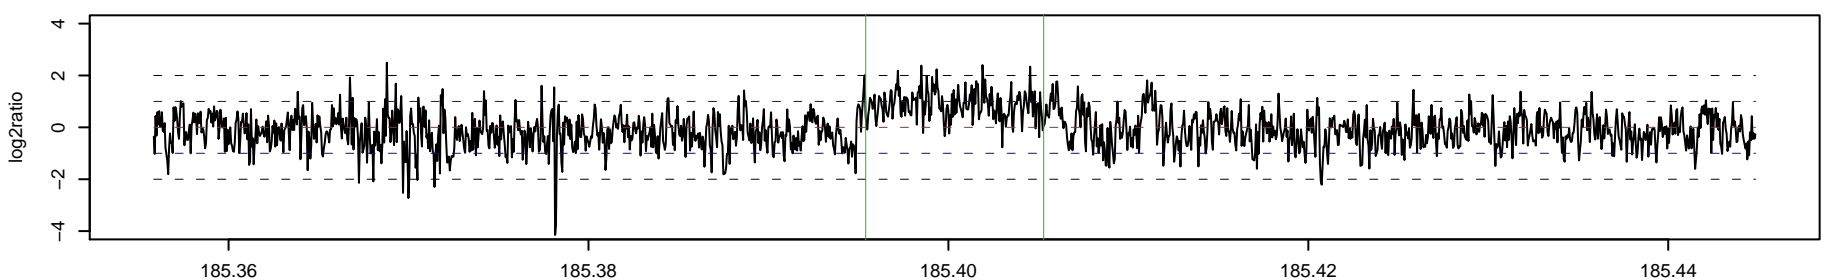

211 \_ AK1 Chr 4 : 187330483 – 187335199 , 4717 bp (aCGH relative log2ratio= 1.07 )

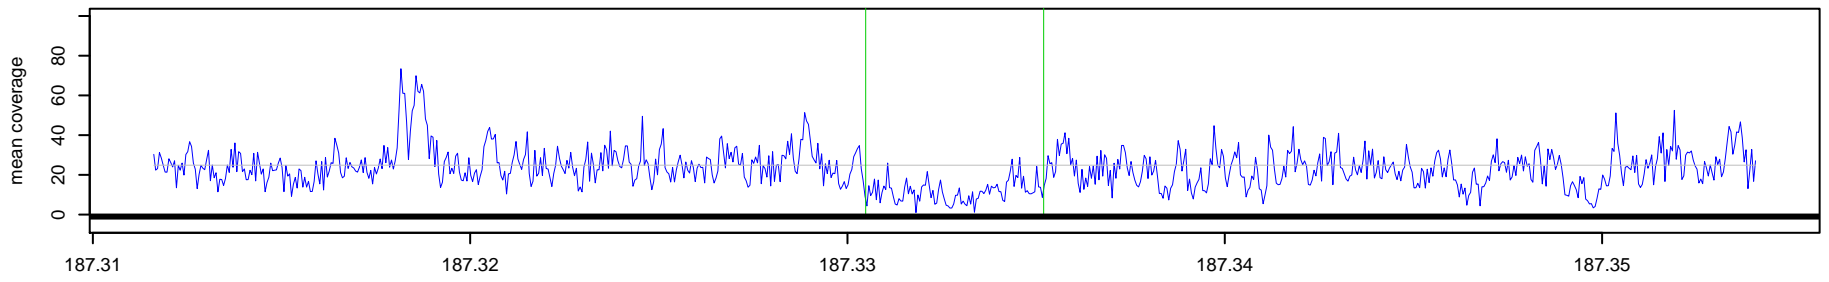

211 \_ NA10851 Chr 4 : 187330483 – 187335199 , 4717 bp (aCGH relative log2ratio= 1.07 )

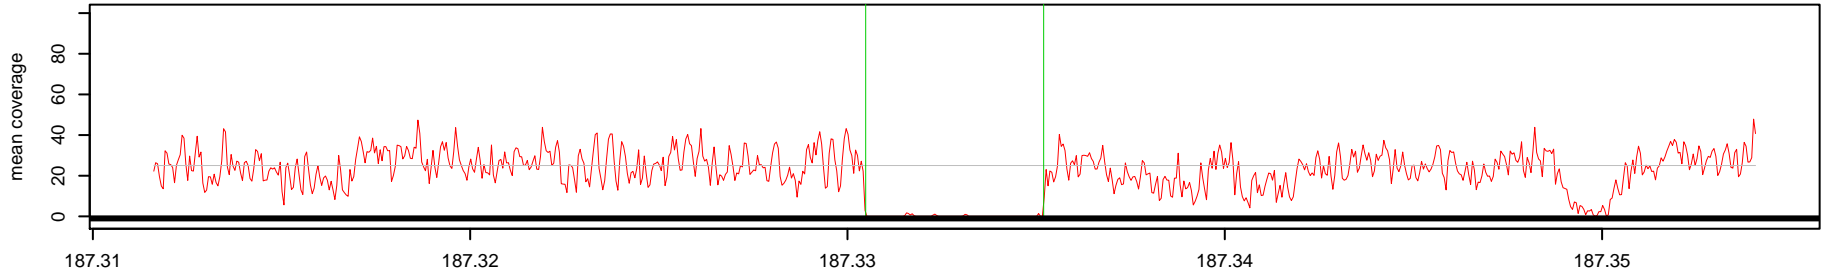

Log2( AK1 read depth / NA10851 read depth)

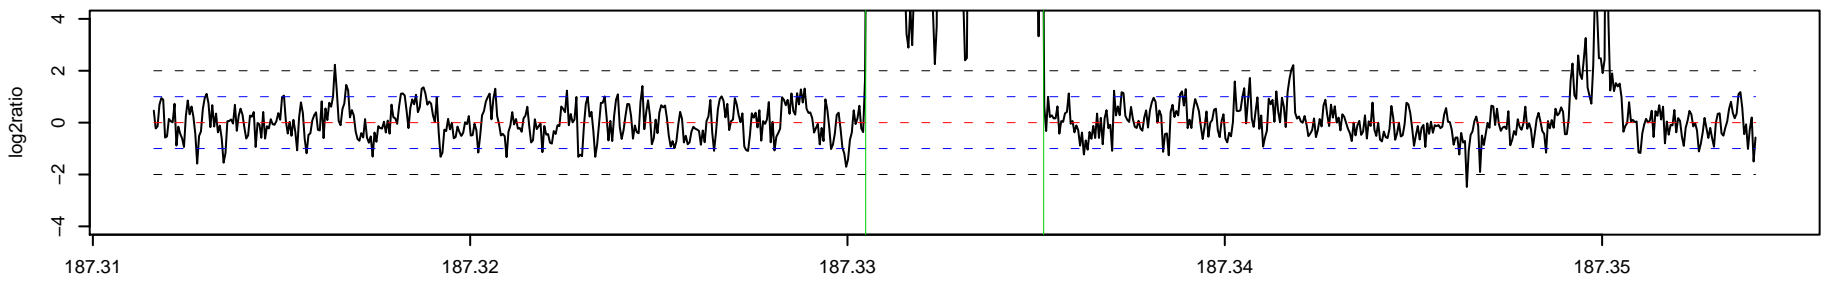

212 \_ AK1 Chr 4 : 190706896 – 190921502 , 214607 bp (aCGH relative log2ratio= 0.53 )

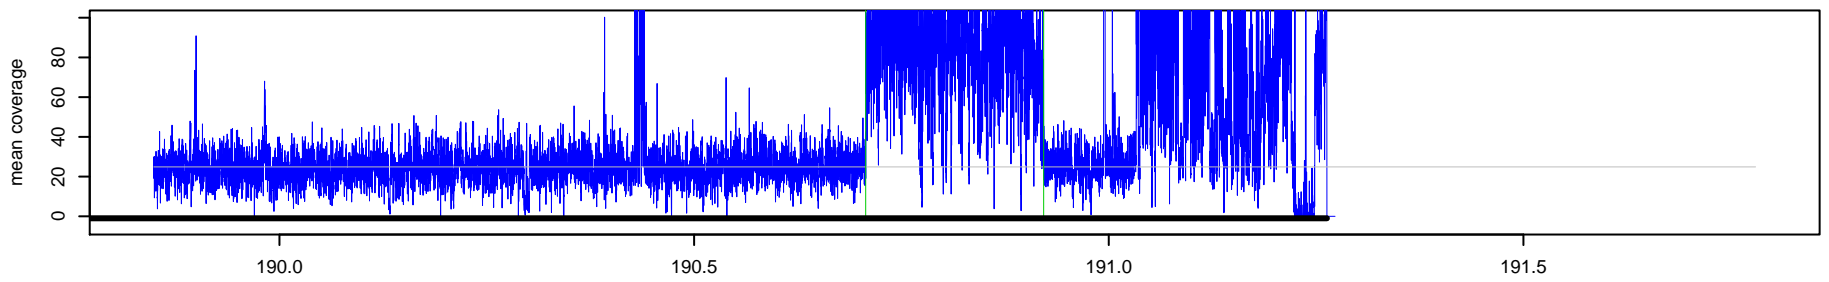

212 \_ NA10851 Chr 4 : 190706896 – 190921502 , 214607 bp (aCGH relative log2ratio= 0.53 )

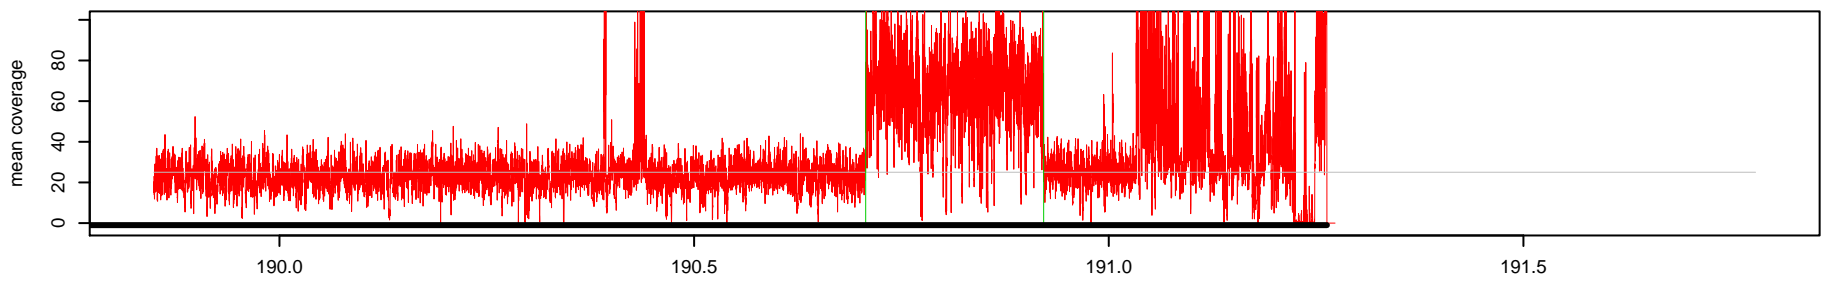

Log2( AK1 read depth / NA10851 read depth)

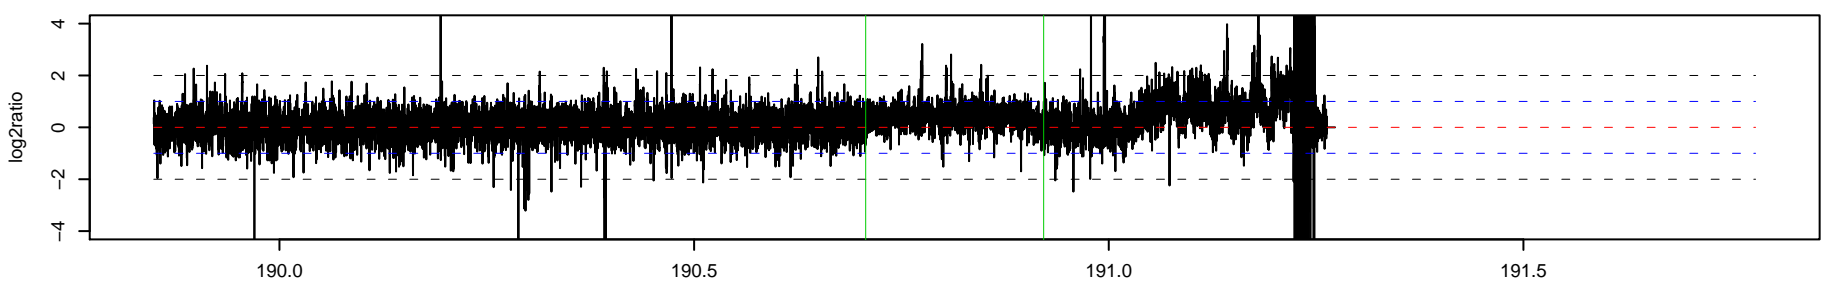

213\_AK1 Chr 5 : 10326896 – 10327880 , 985 bp (aCGH relative log2ratio= 1.36 )

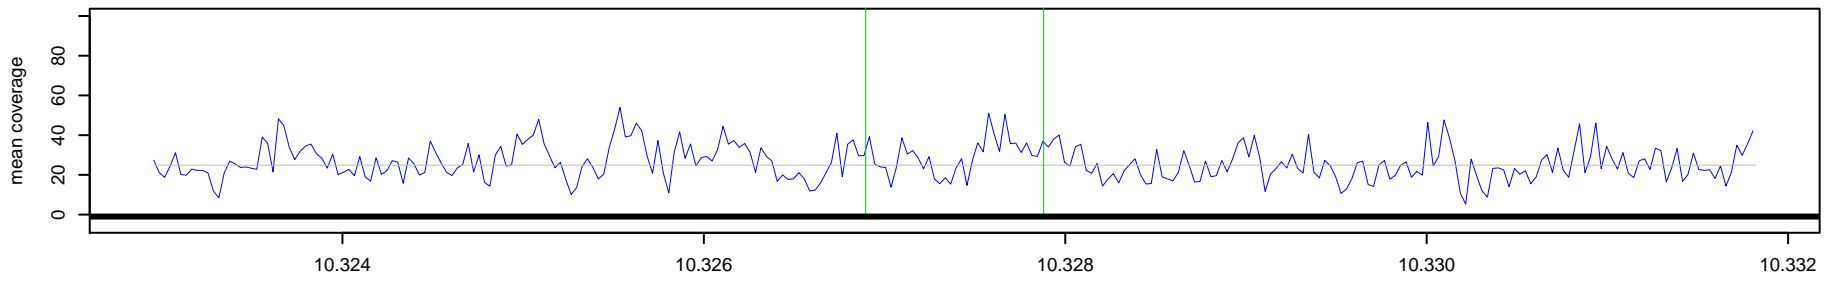

213\_NA10851 Chr 5 : 10326896 – 10327880 , 985 bp (aCGH relative log2ratio= 1.36 )

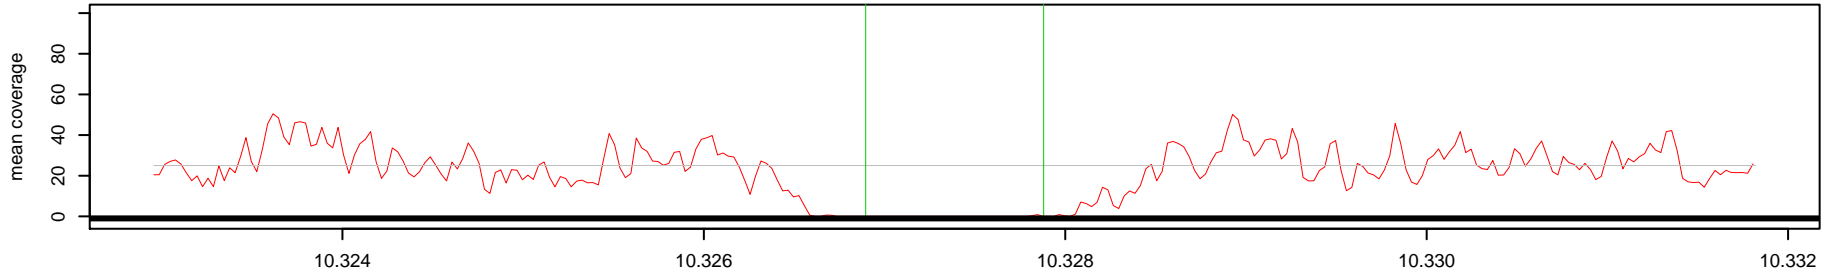

Log2( AK1 read depth / NA10851 read depth)

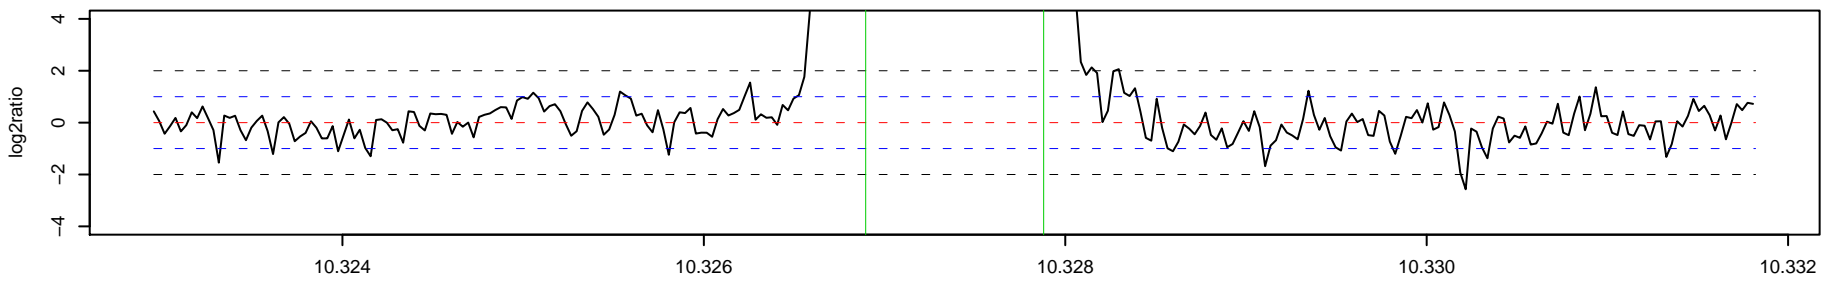

214\_AK1 Chr 5 : 12863801 – 12873489 , 9689 bp (aCGH relative log2ratio= -0.56 )

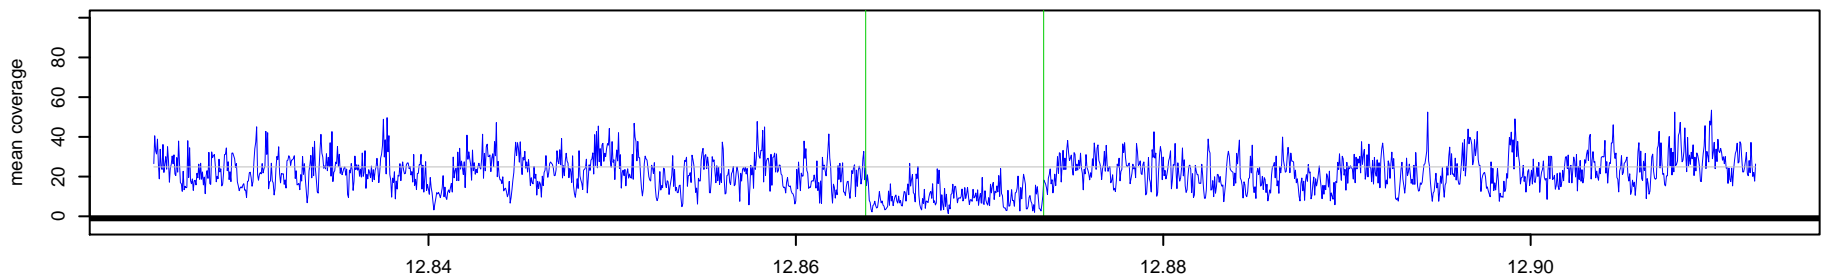

214\_NA10851 Chr 5 : 12863801 – 12873489 , 9689 bp (aCGH relative log2ratio= -0.56 )

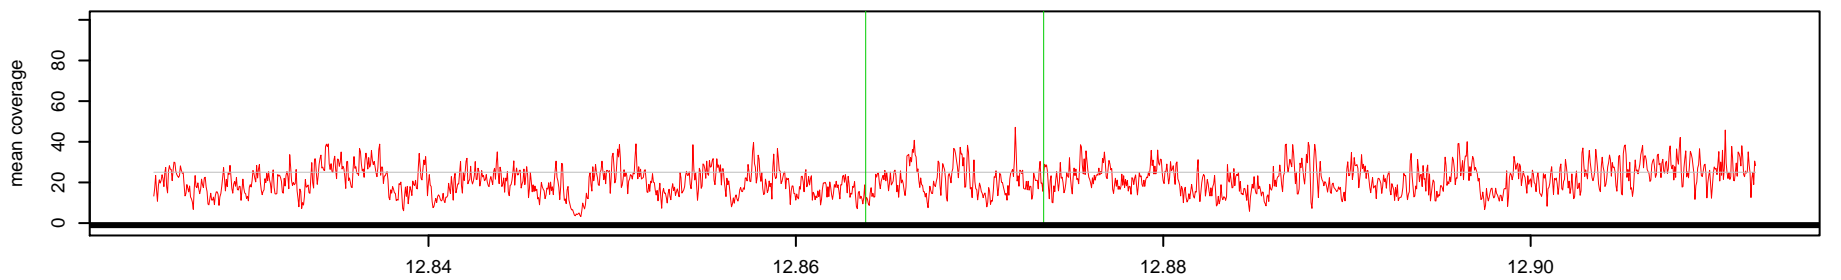

Log2( AK1 read depth / NA10851 read depth)

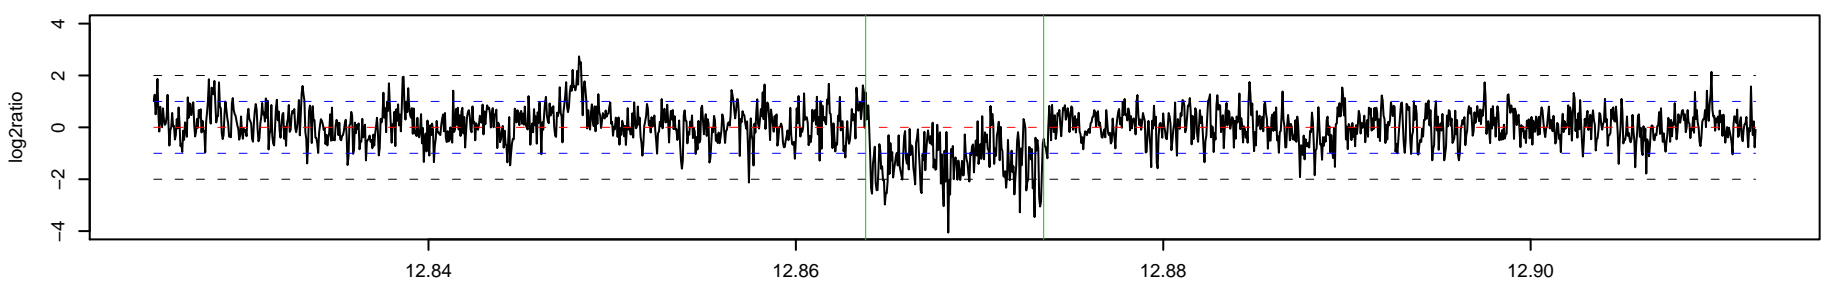

215\_AK1 Chr 5 : 19411124 – 19412109 , 986 bp (aCGH relative log2ratio= 0.57 )

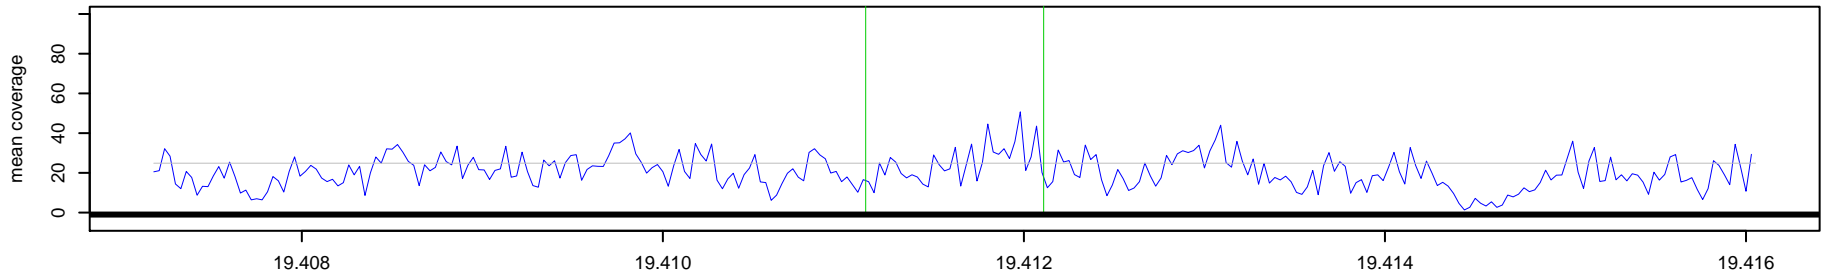

215\_NA10851 Chr 5 : 19411124 – 19412109 , 986 bp (aCGH relative log2ratio= 0.57 )

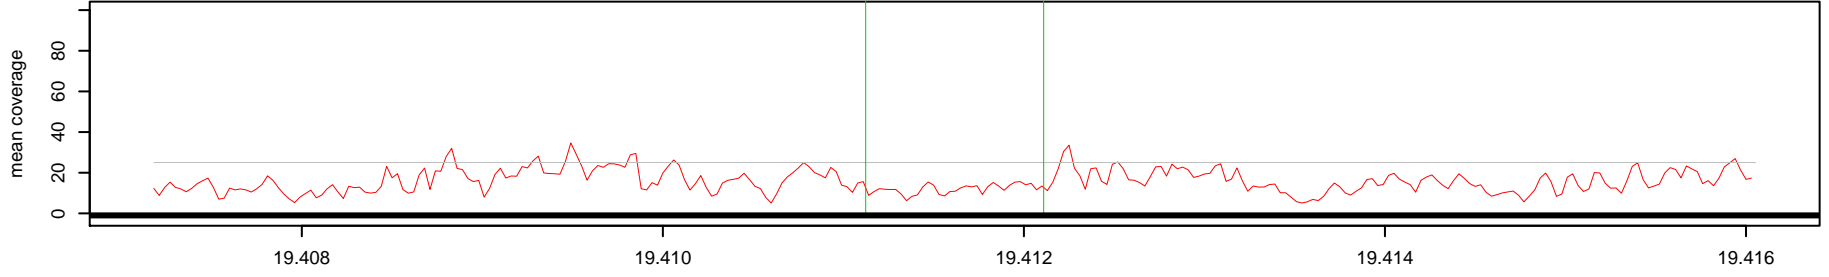

Log2( AK1 read depth / NA10851 read depth)

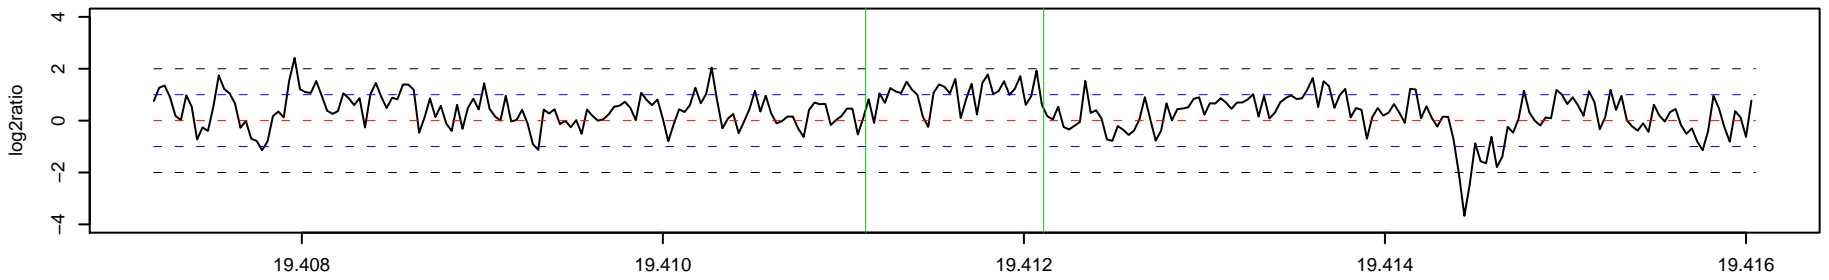

216\_AK1 Chr 5 : 21485744 – 21488057 , 2314 bp (aCGH relative log2ratio= -0.59 )

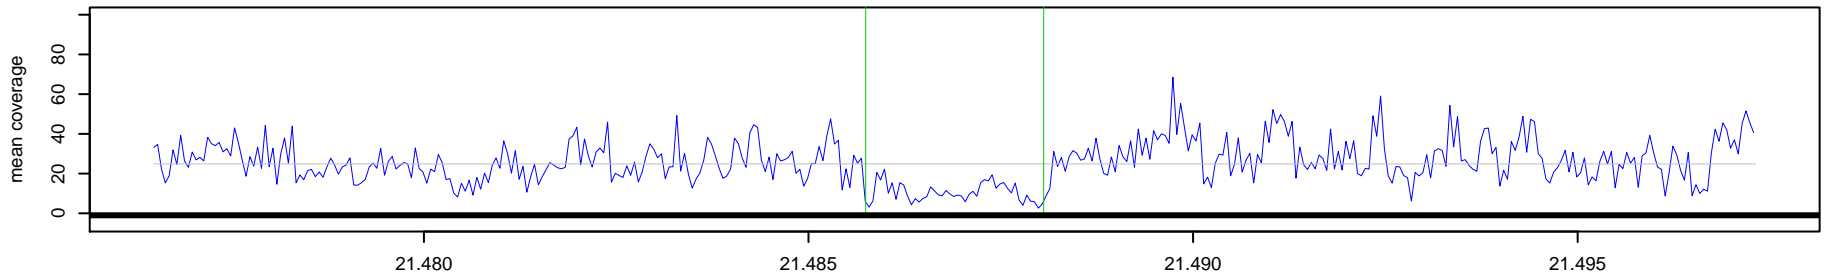

216\_NA10851 Chr 5 : 21485744 – 21488057 , 2314 bp (aCGH relative log2ratio= -0.59 )

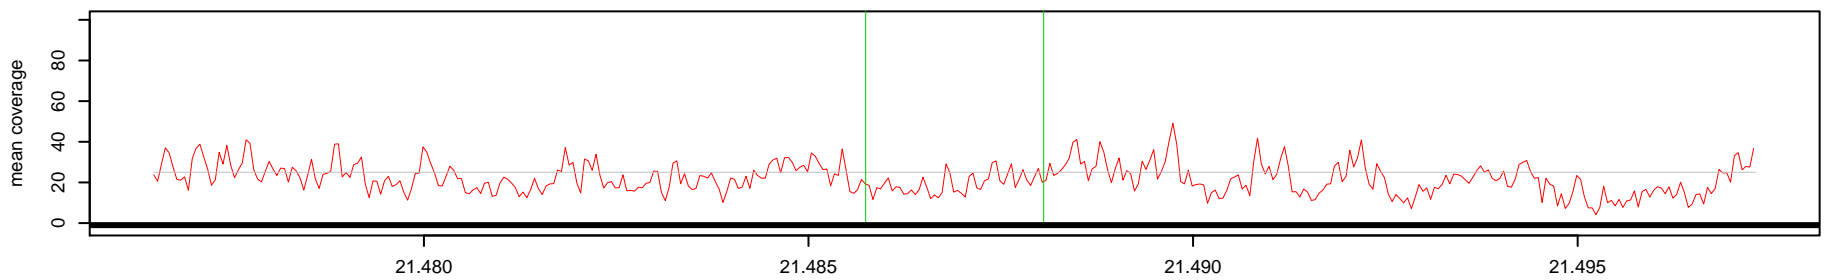

Log2( AK1 read depth / NA10851 read depth)

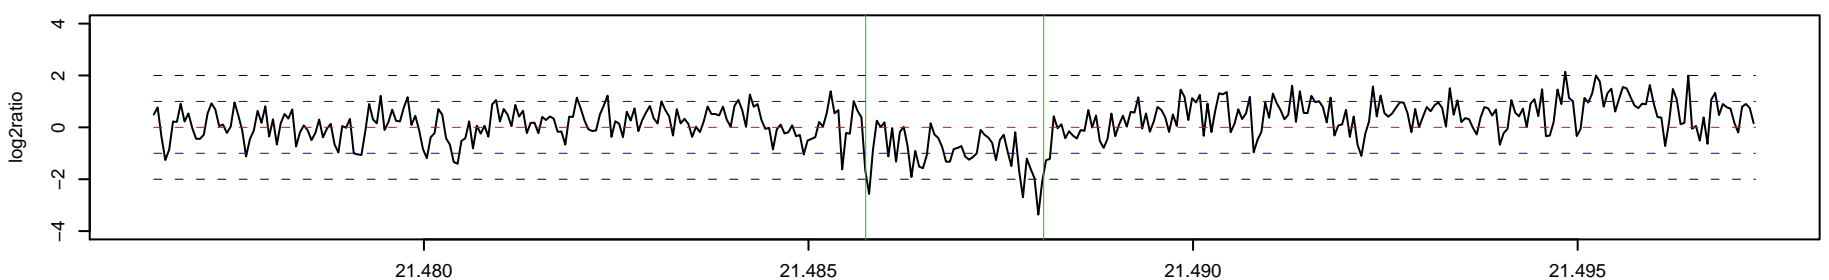



217\_AK1 Chr 5 : 26833545 – 26837689 , 4145 bp (aCGH relative log2ratio= 0.71 )

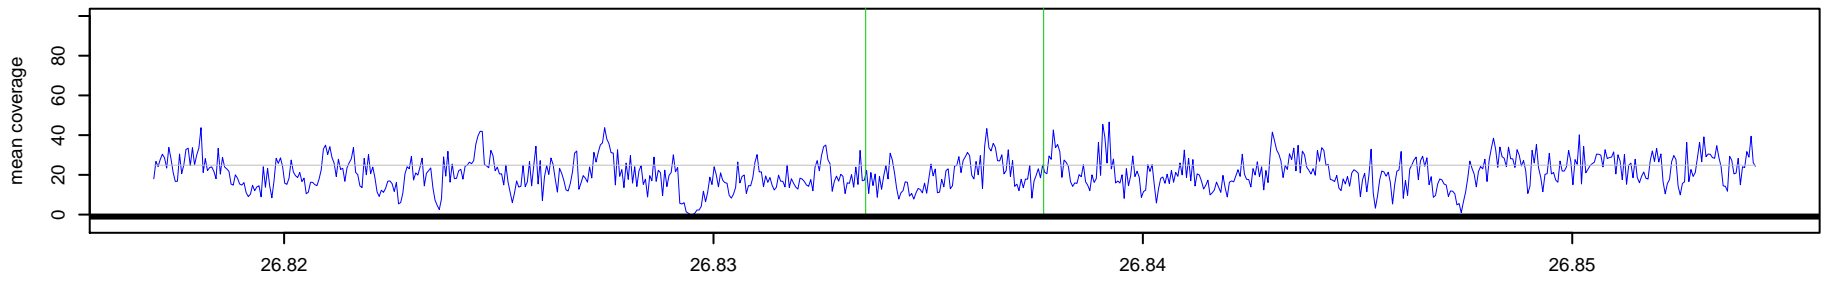

217\_NA10851 Chr 5 : 26833545 – 26837689 , 4145 bp (aCGH relative log2ratio= 0.71 )

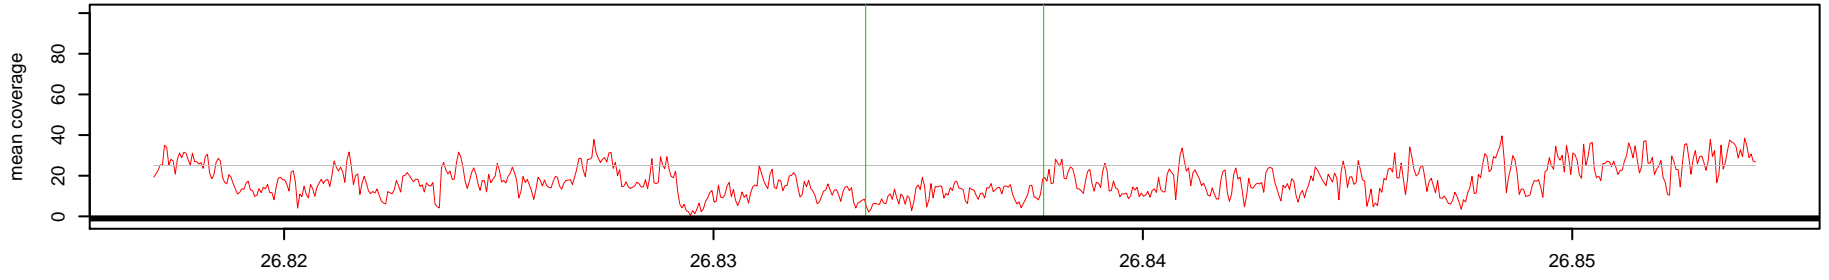

Log2( AK1 read depth / NA10851 read depth)

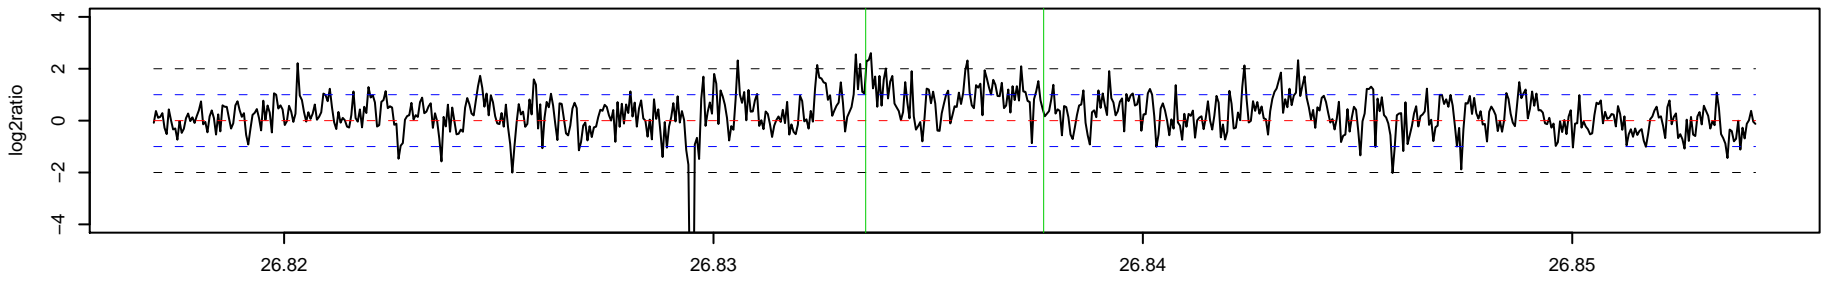

218\_AK1 Chr 5 : 28526829 – 28531355 , 4527 bp (aCGH relative log2ratio= 0.63 )

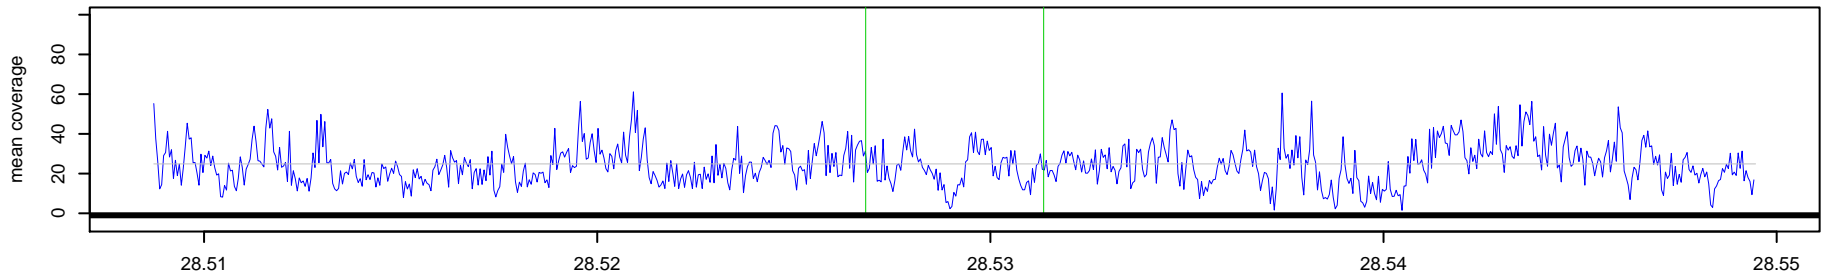

218\_NA10851 Chr 5 : 28526829 – 28531355 , 4527 bp (aCGH relative log2ratio= 0.63 )

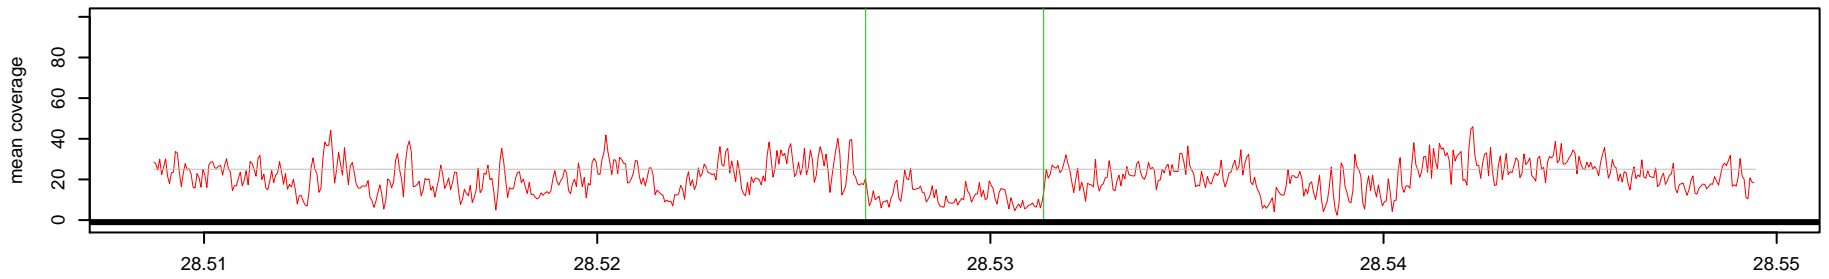

Log2( AK1 read depth / NA10851 read depth)

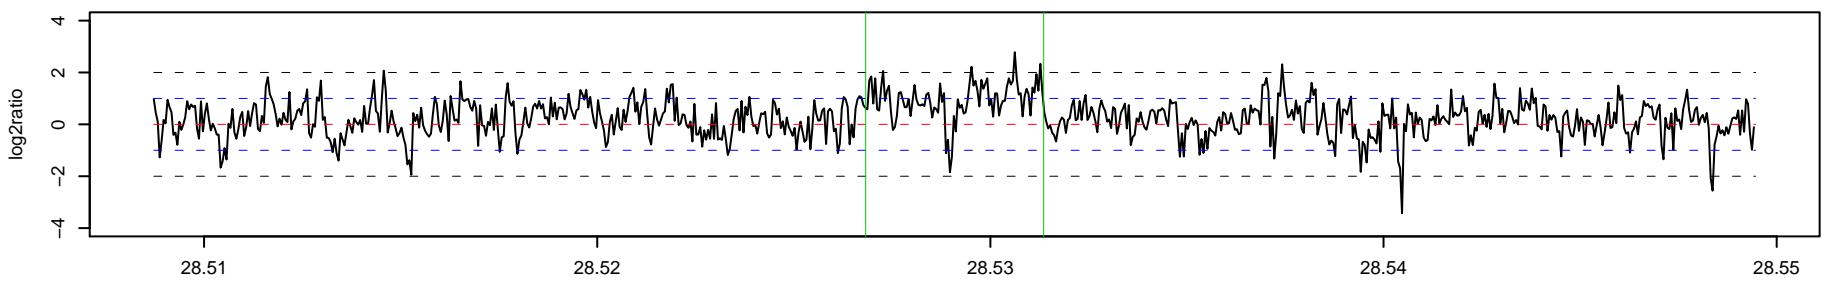

219\_AK1 Chr 5 : 32295882 – 32299050 , 3169 bp (aCGH relative log2ratio= -0.70 )

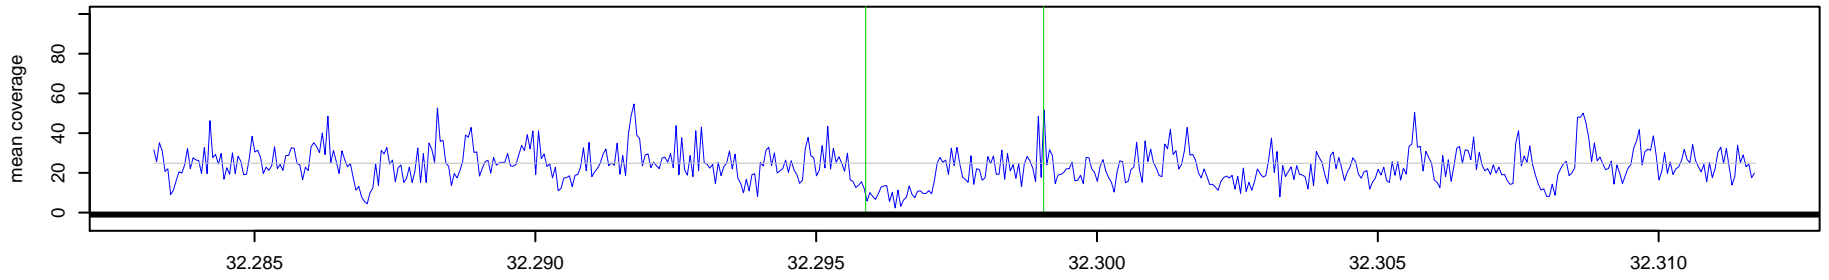

219\_NA10851 Chr 5 : 32295882 – 32299050 , 3169 bp (aCGH relative log2ratio= -0.70 )

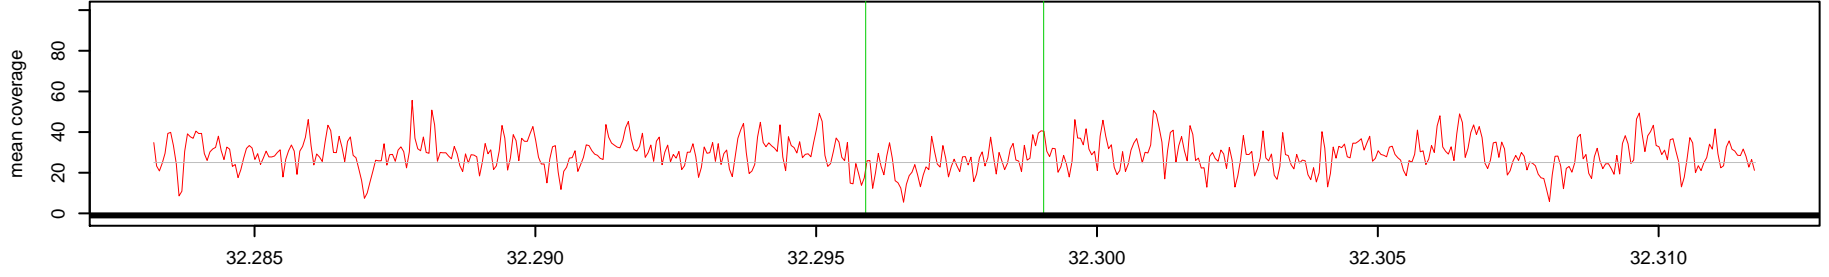

Log2( AK1 read depth / NA10851 read depth)

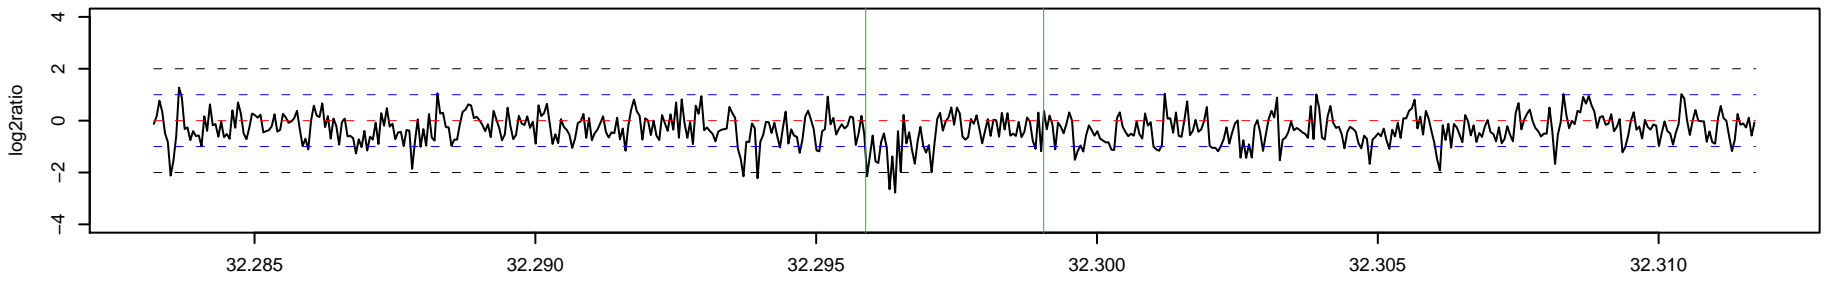

220\_AK1 Chr 5 : 40254922 – 40255464 , 543 bp (aCGH relative log2ratio= -0.73 )

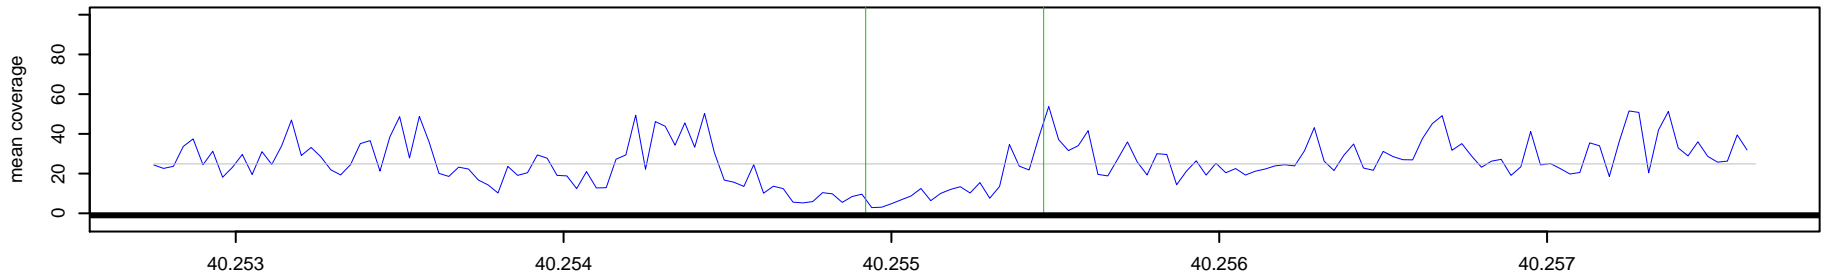

220\_NA10851 Chr 5 : 40254922 – 40255464 , 543 bp (aCGH relative log2ratio= -0.73 )

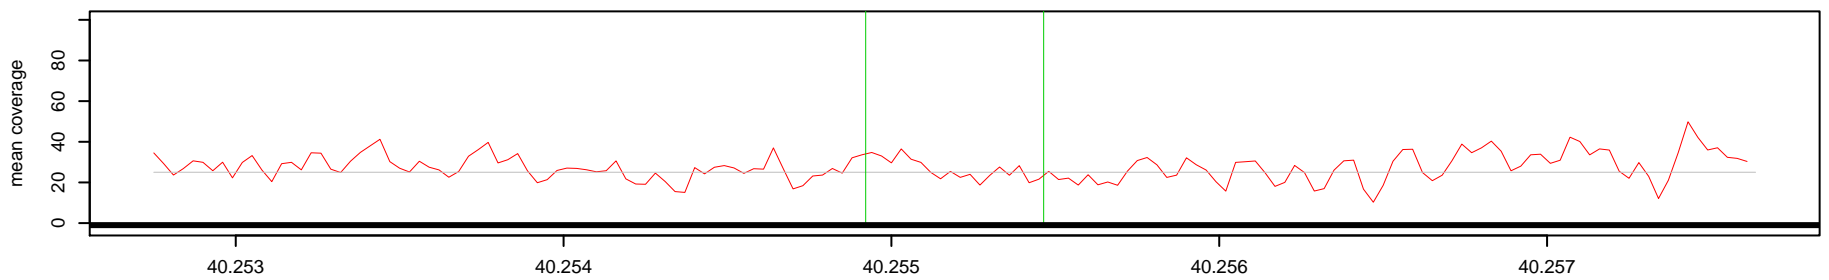

Log2( AK1 read depth / NA10851 read depth)

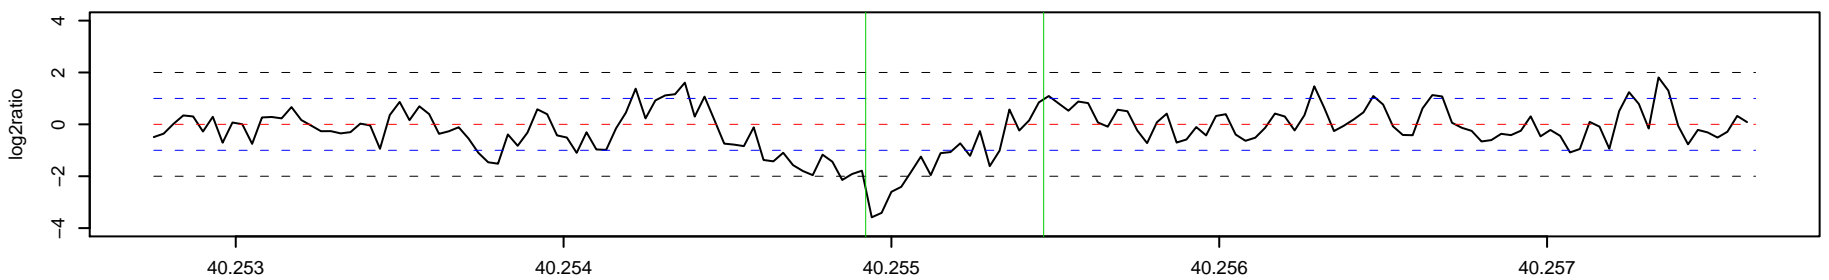

221 \_ AK1 Chr 5 : 40884480 – 40886128 , 1649 bp (aCGH relative log2ratio= -0.84 )

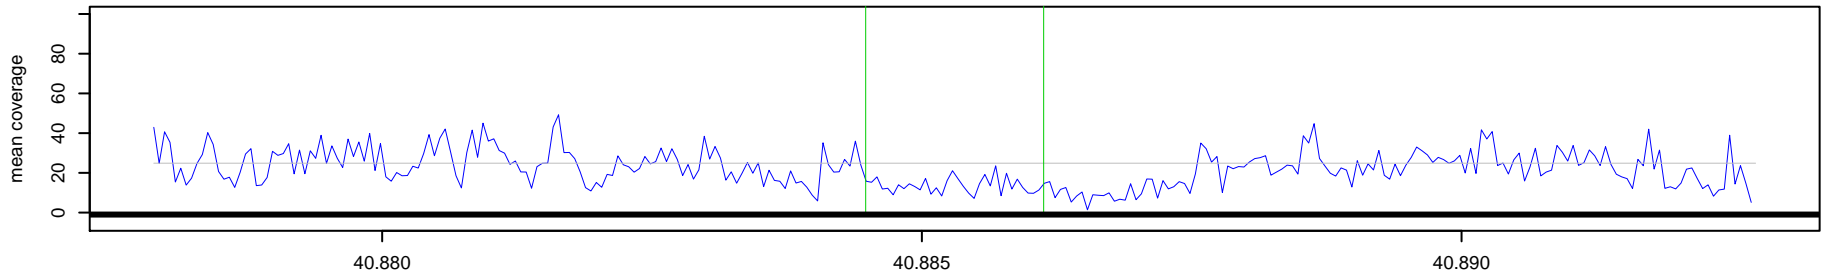

221 \_ NA10851 Chr 5 : 40884480 – 40886128 , 1649 bp (aCGH relative log2ratio= -0.84 )

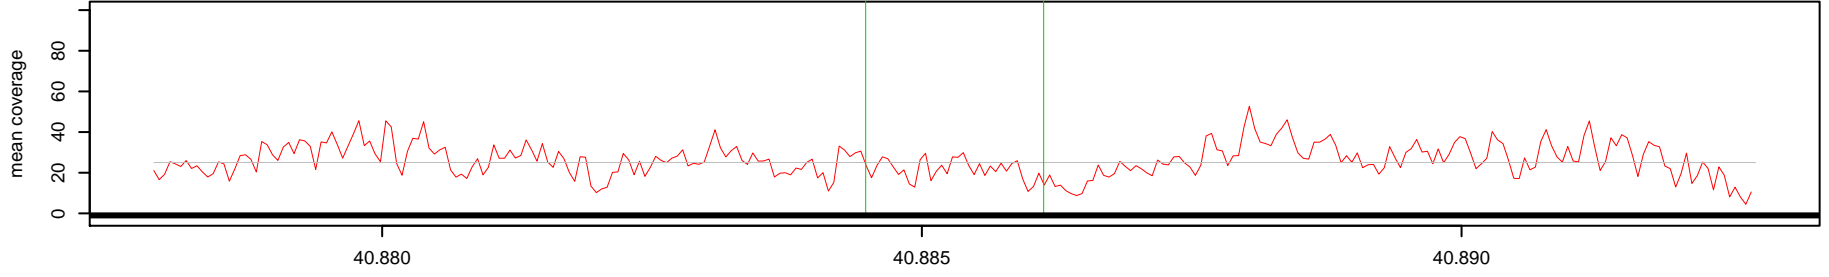

Log2( AK1 read depth / NA10851 read depth)

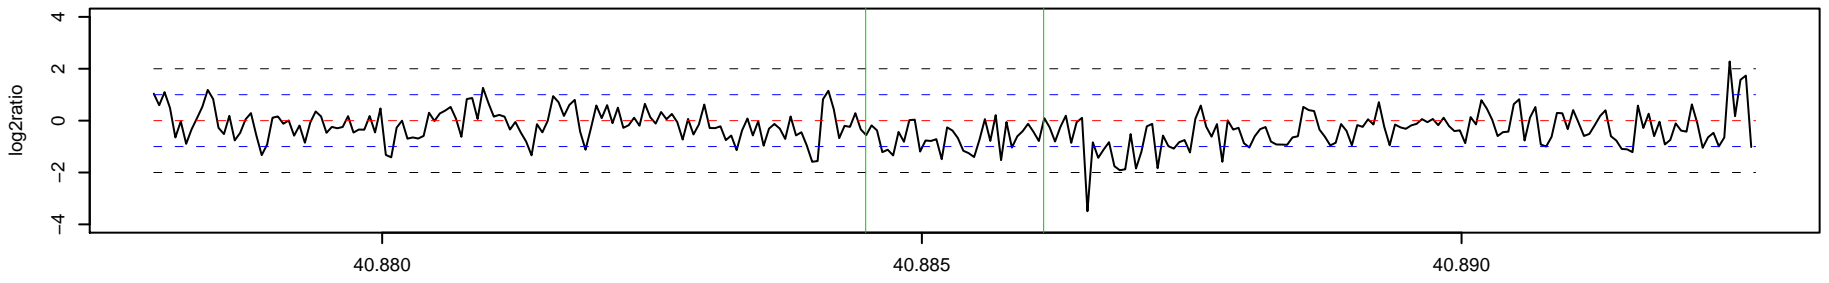

o

222 \_ AK1 Chr 5 : 45040651 – 45050054 , 9404 bp (aCGH relative log2ratio= 0.66 )

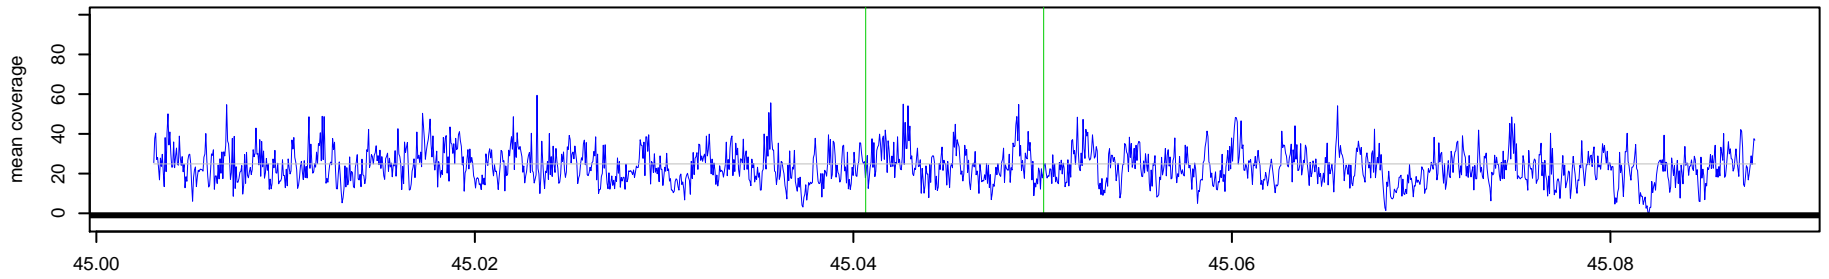

222 \_ NA10851 Chr 5 : 45040651 – 45050054 , 9404 bp (aCGH relative log2ratio= 0.66 )

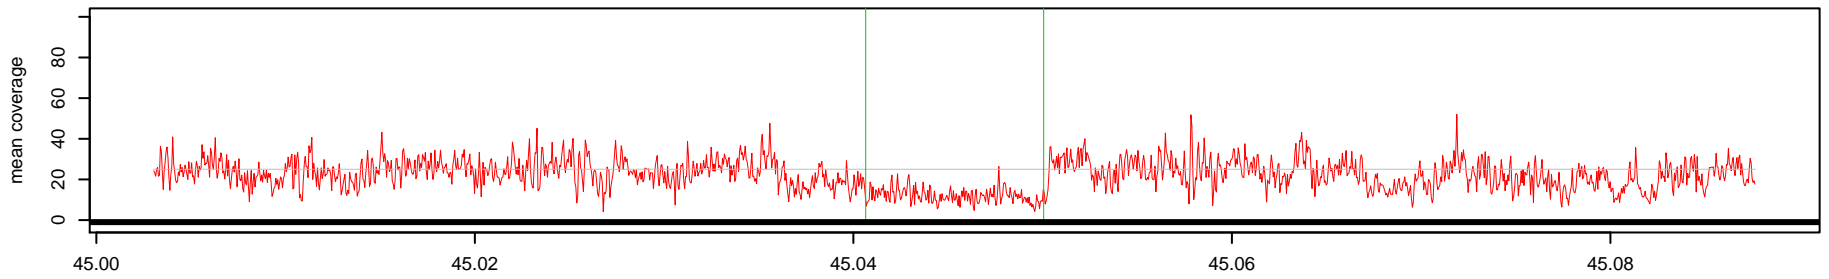

Log2( AK1 read depth / NA10851 read depth)

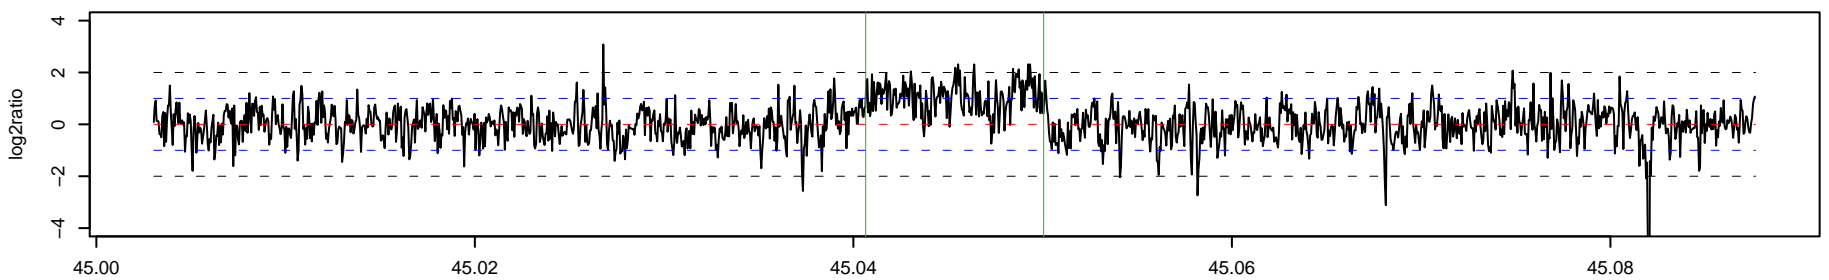

o

223\_AK1 Chr 5 : 63735282 – 63737153 , 1872 bp (aCGH relative log2ratio= 0.96 )

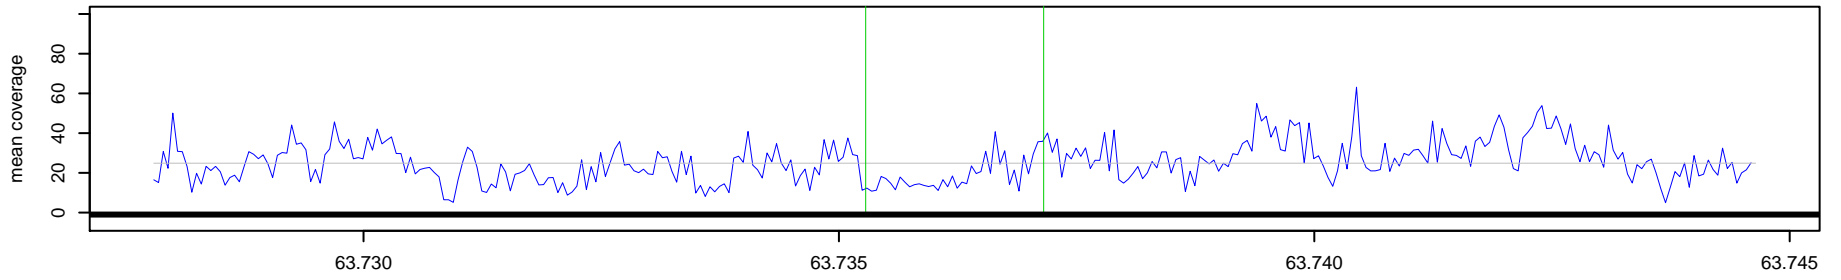

223\_NA10851 Chr 5 : 63735282 – 63737153 , 1872 bp (aCGH relative log2ratio= 0.96 )

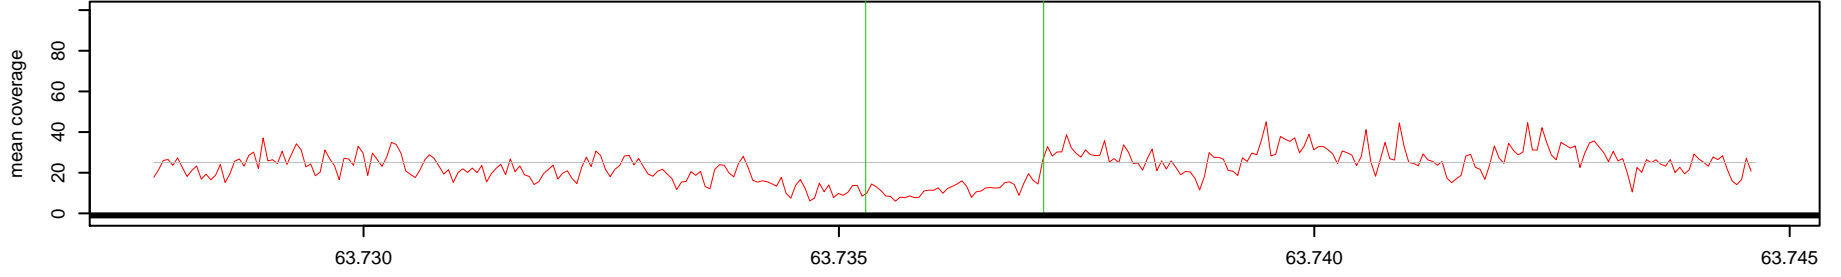

Log2( AK1 read depth / NA10851 read depth)

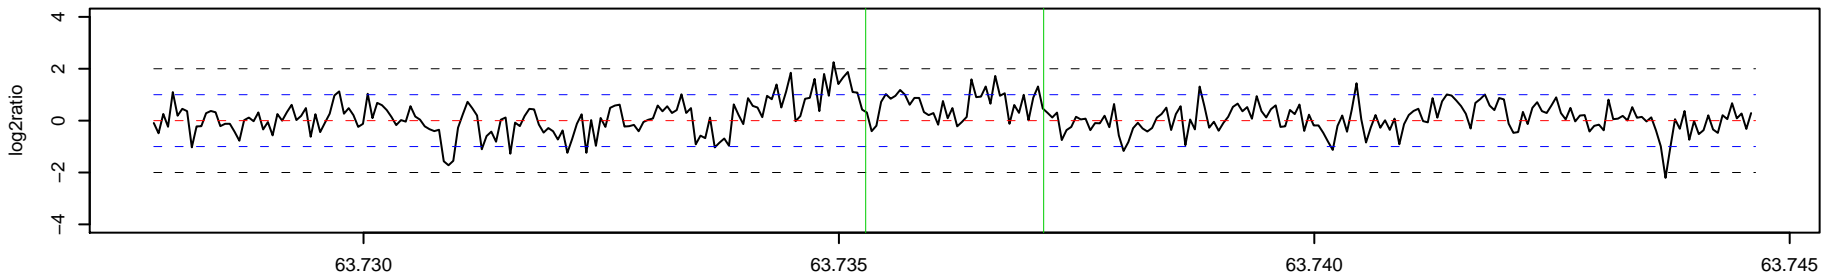

224\_AK1 Chr 5 : 79994906 – 79995491 , 586 bp (aCGH relative log2ratio= 0.57 )

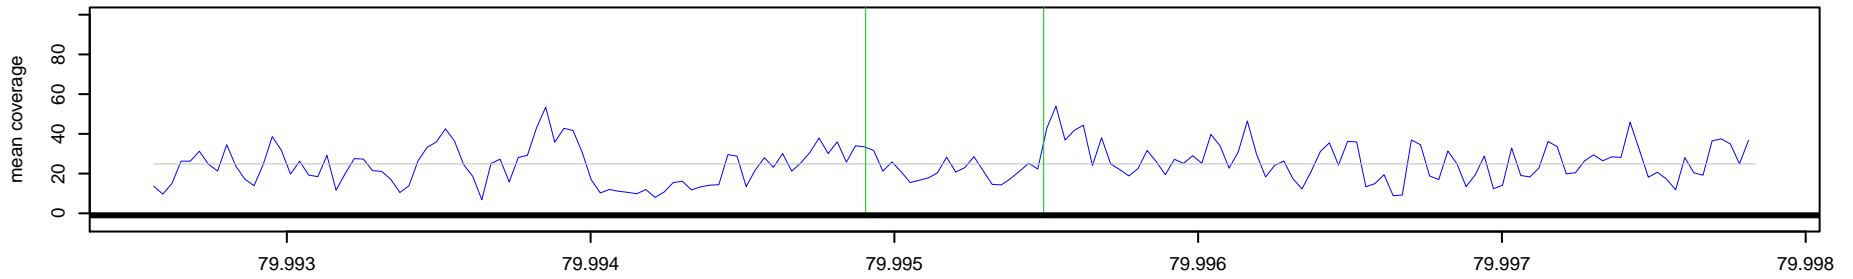

224\_NA10851 Chr 5 : 79994906 – 79995491 , 586 bp (aCGH relative log2ratio= 0.57 )

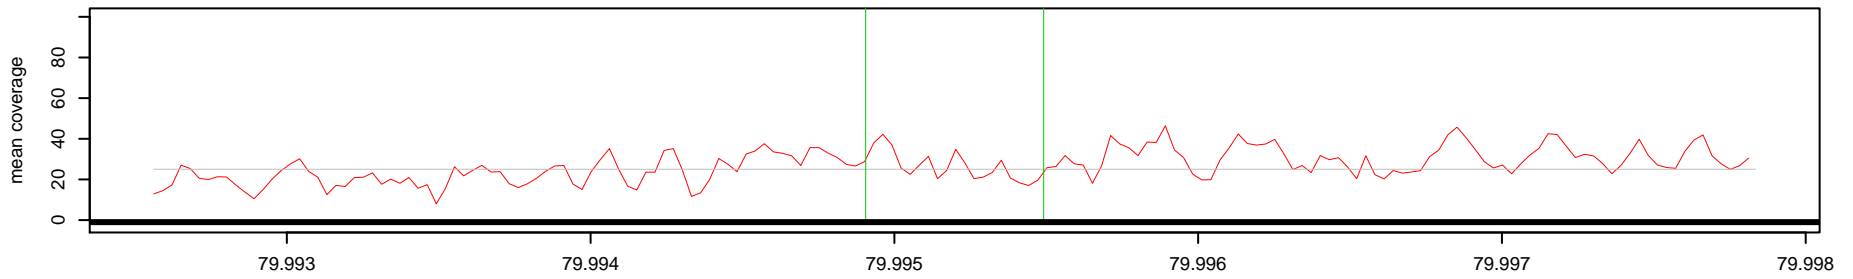

Log2( AK1 read depth / NA10851 read depth)

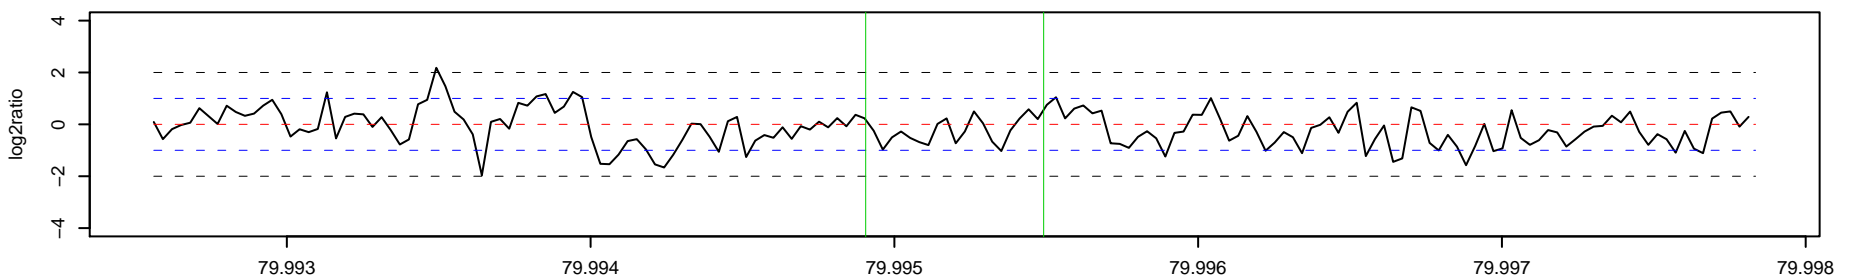

225 \_ AK1 Chr 5 : 90535981 – 90537791 , 1811 bp (aCGH relative log2ratio= 2.08 )

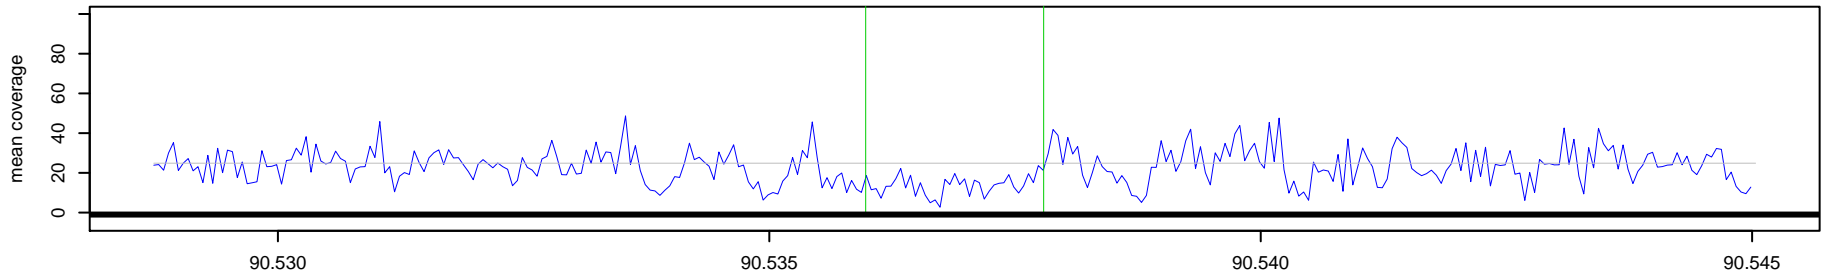

225 \_ NA10851 Chr 5 : 90535981 – 90537791 , 1811 bp (aCGH relative log2ratio= 2.08 )

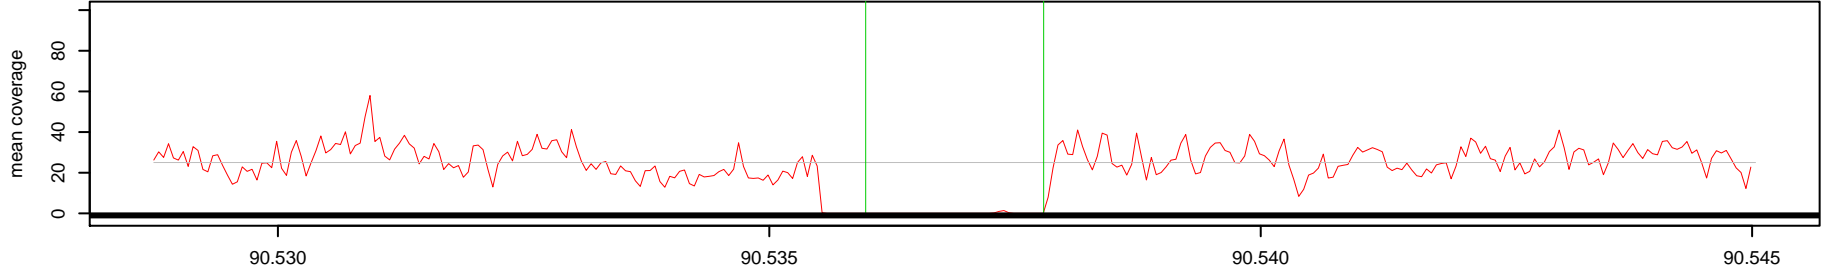

Log2( AK1 read depth / NA10851 read depth)

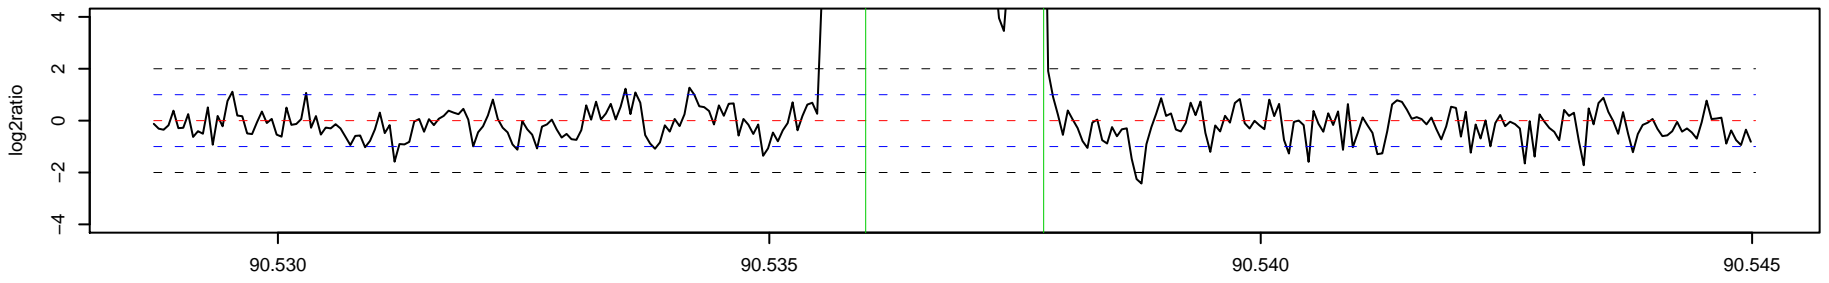

226 \_ AK1 Chr 5 : 97427371 – 97428438 , 1068 bp (aCGH relative log2ratio= -2.44 )

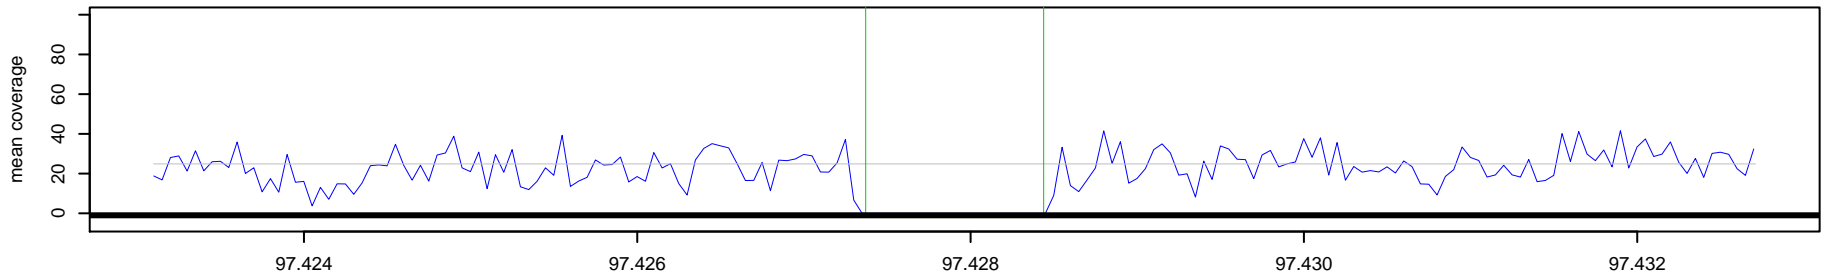

226 \_ NA10851 Chr 5 : 97427371 – 97428438 , 1068 bp (aCGH relative log2ratio= -2.44 )

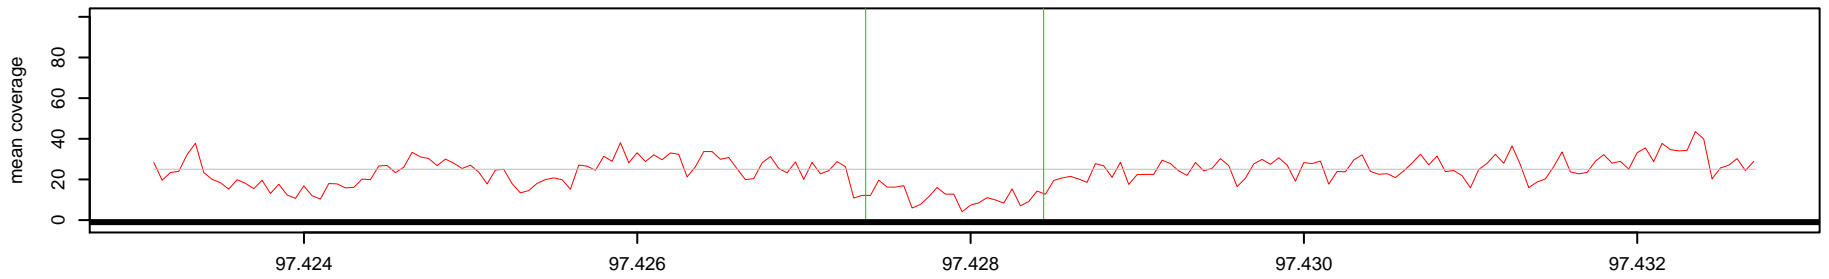

Log2( AK1 read depth / NA10851 read depth)

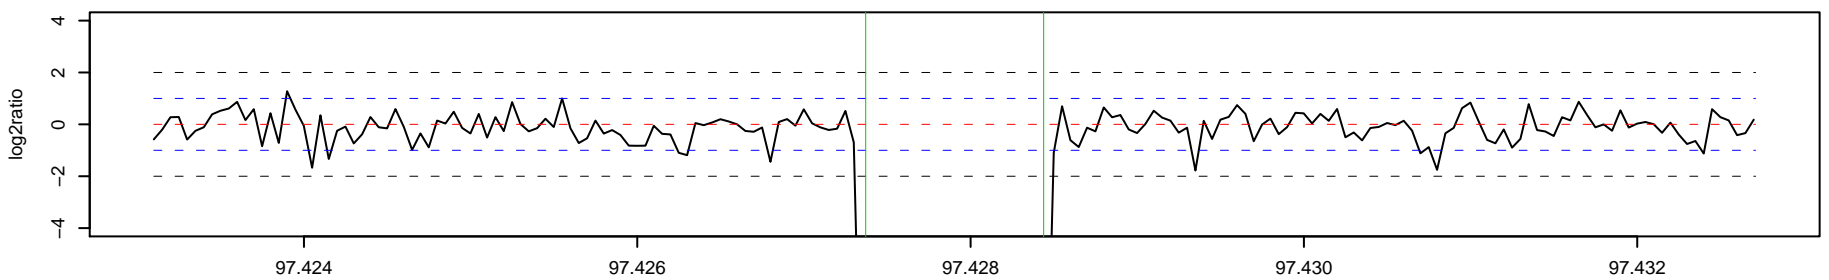

227 \_ AK1 Chr 5 : 104994843 – 104995376 , 534 bp (aCGH relative log2ratio= 0.68 )

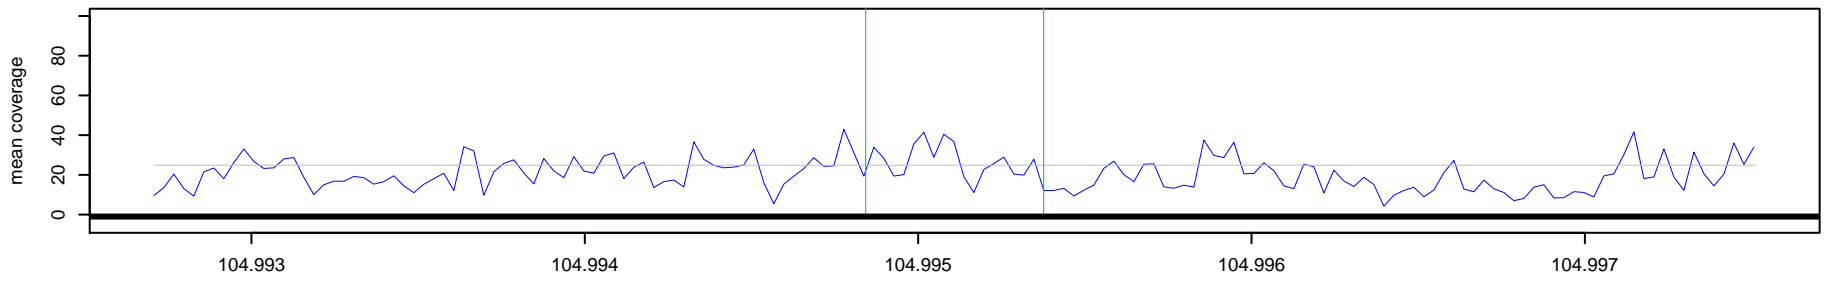

227 \_ NA10851 Chr 5 : 104994843 – 104995376 , 534 bp (aCGH relative log2ratio= 0.68 )

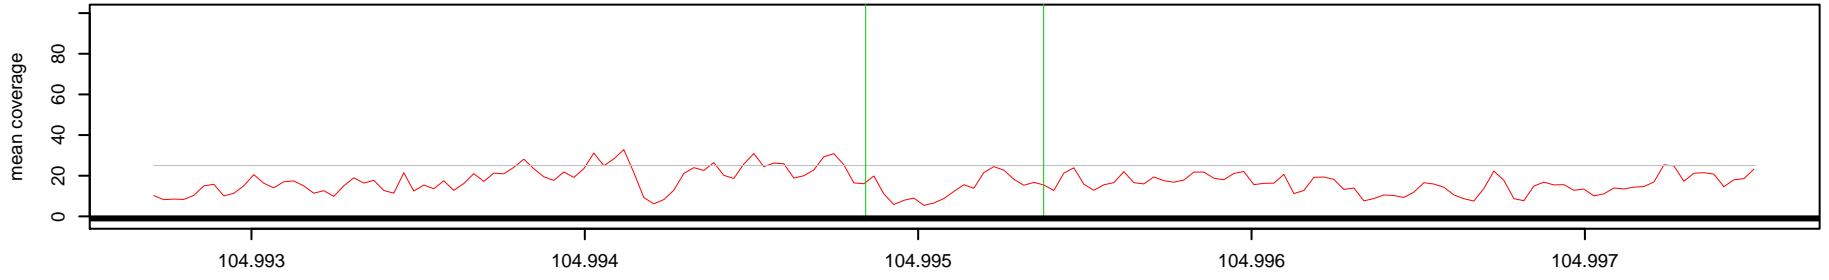

Log2( AK1 read depth / NA10851 read depth)

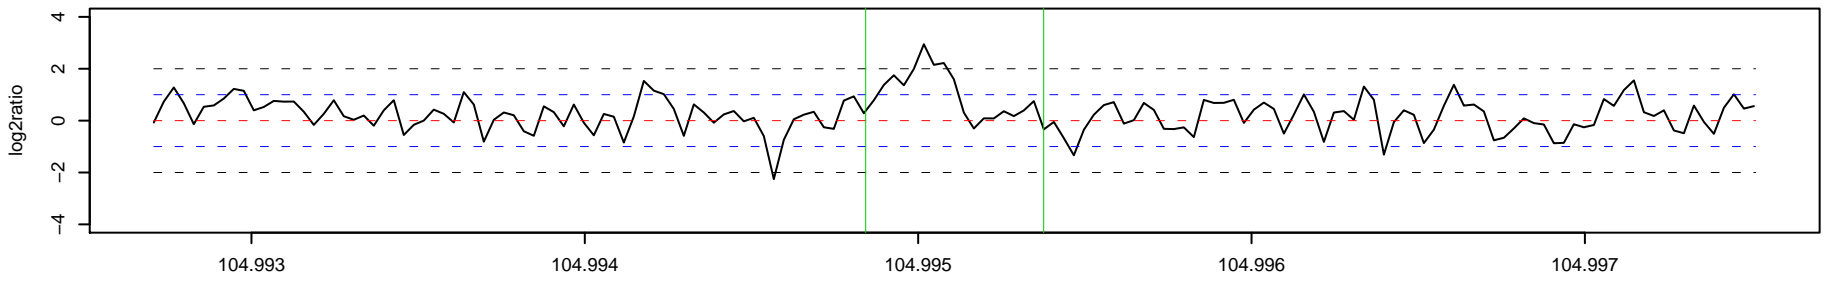

228 \_ AK1 Chr 5 : 106352694 – 106353994 , 1301 bp (aCGH relative log2ratio= 0.74 )

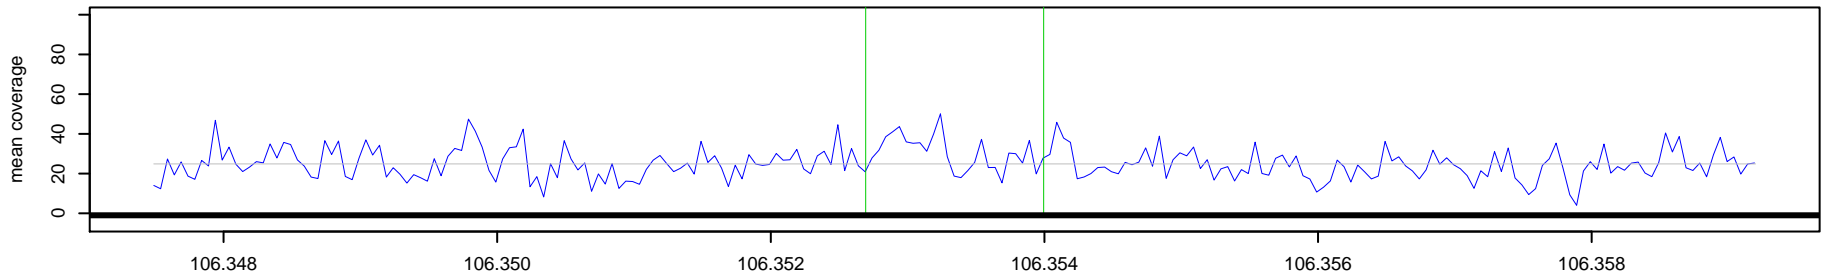

228 \_ NA10851 Chr 5 : 106352694 – 106353994 , 1301 bp (aCGH relative log2ratio= 0.74 )

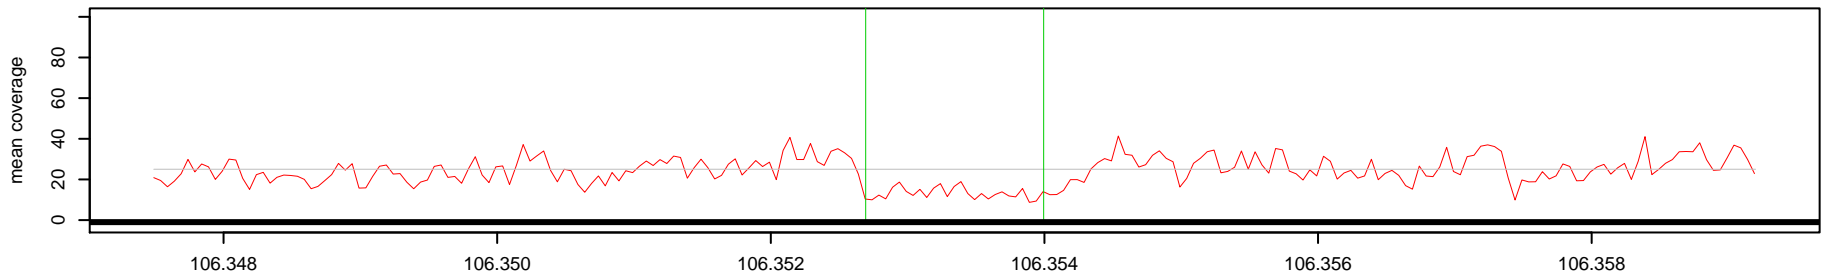

Log2( AK1 read depth / NA10851 read depth)

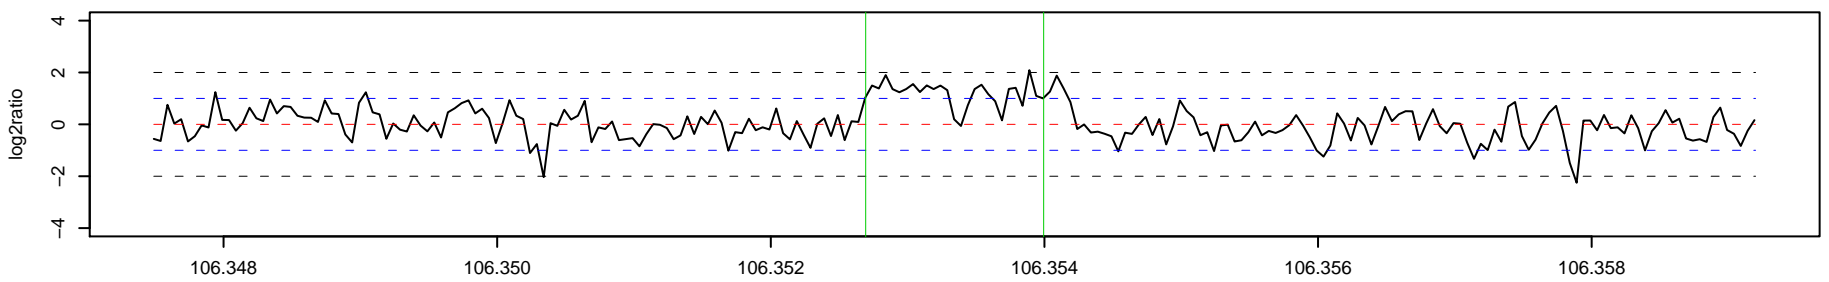

229 \_ AK1 Chr 5 : 110022252 – 110063632 , 41381 bp (aCGH relative log2ratio= 0.60 )

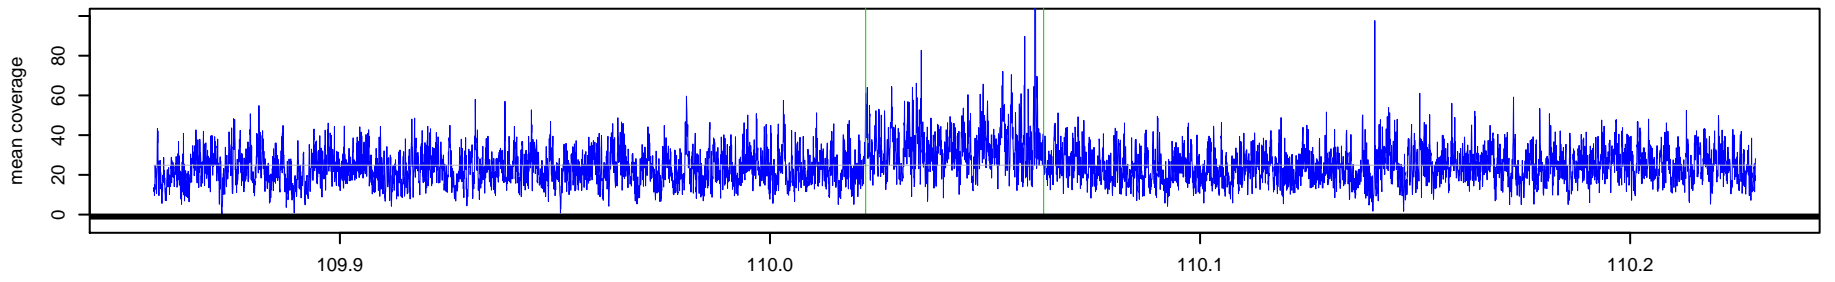

229 \_ NA10851 Chr 5 : 110022252 – 110063632 , 41381 bp (aCGH relative log2ratio= 0.60 )

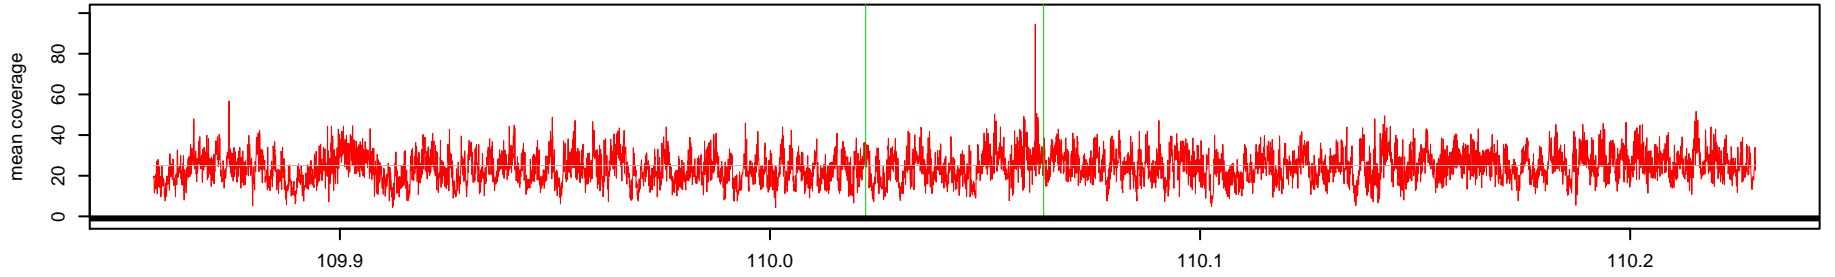

Log2( AK1 read depth / NA10851 read depth)

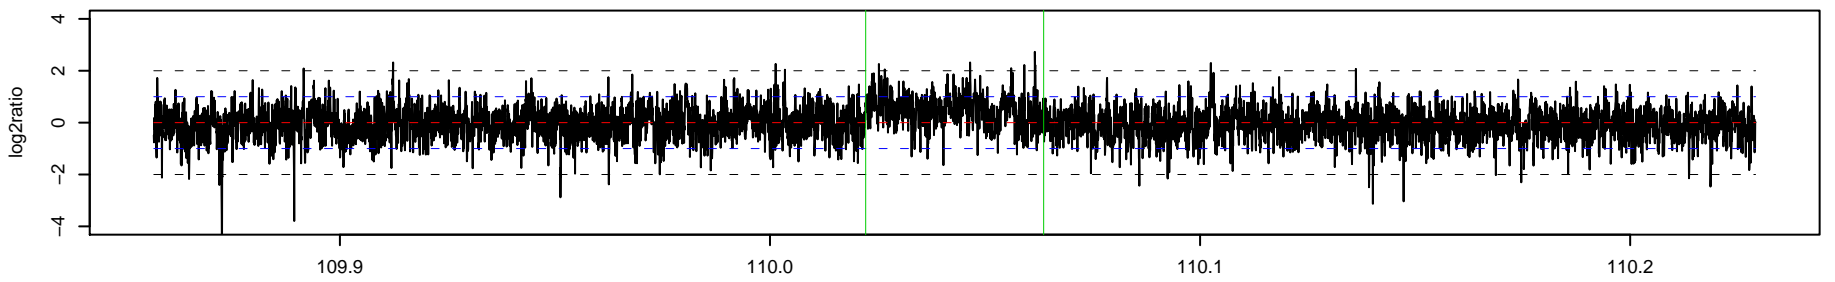

230 \_ AK1 Chr 5 : 111967378 – 111970670 , 3293 bp (aCGH relative log2ratio= 0.47 )

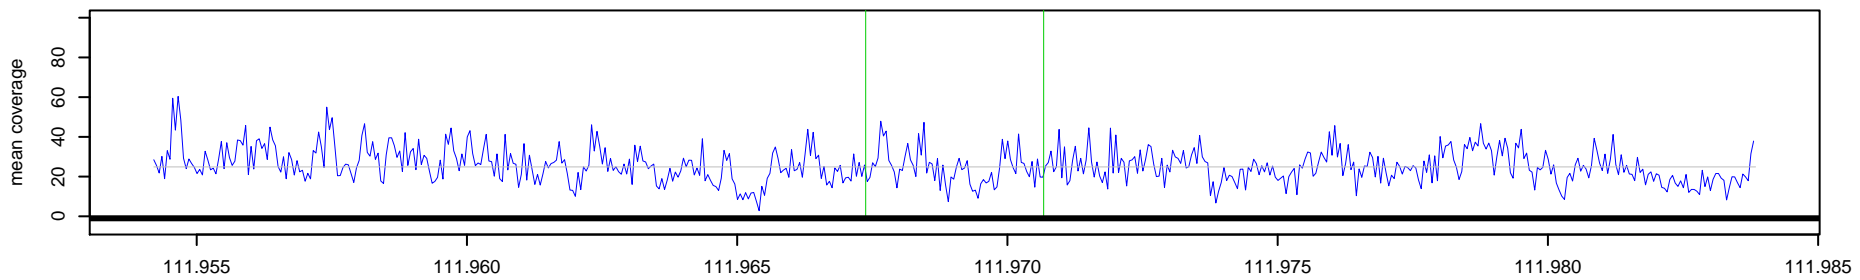

230 \_ NA10851 Chr 5 : 111967378 – 111970670 , 3293 bp (aCGH relative log2ratio= 0.47 )

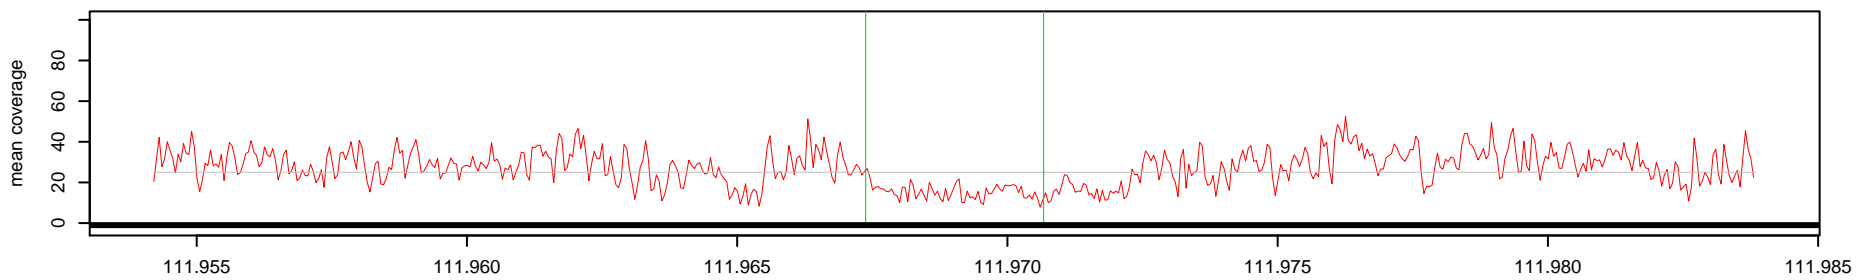

Log2( AK1 read depth / NA10851 read depth)

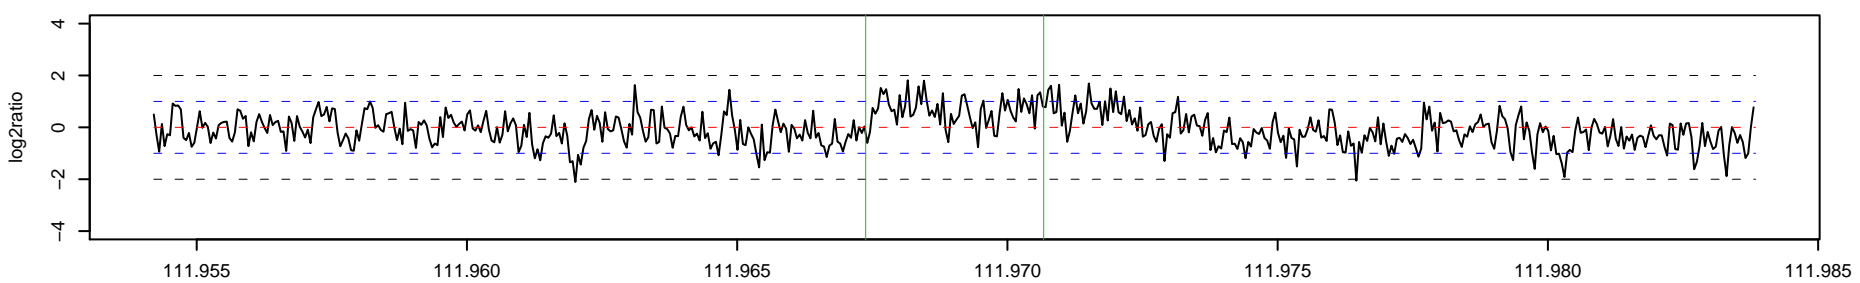

231 \_ AK1 Chr 5 : 119408519 – 119410156 , 1638 bp (aCGH relative log2ratio= -3.88 )

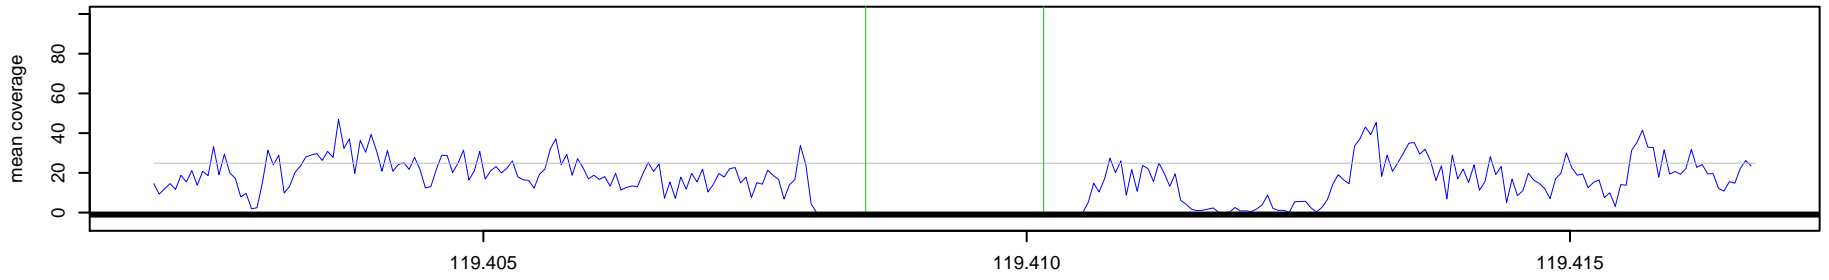

231 \_ NA10851 Chr 5 : 119408519 – 119410156 , 1638 bp (aCGH relative log2ratio= -3.88 )

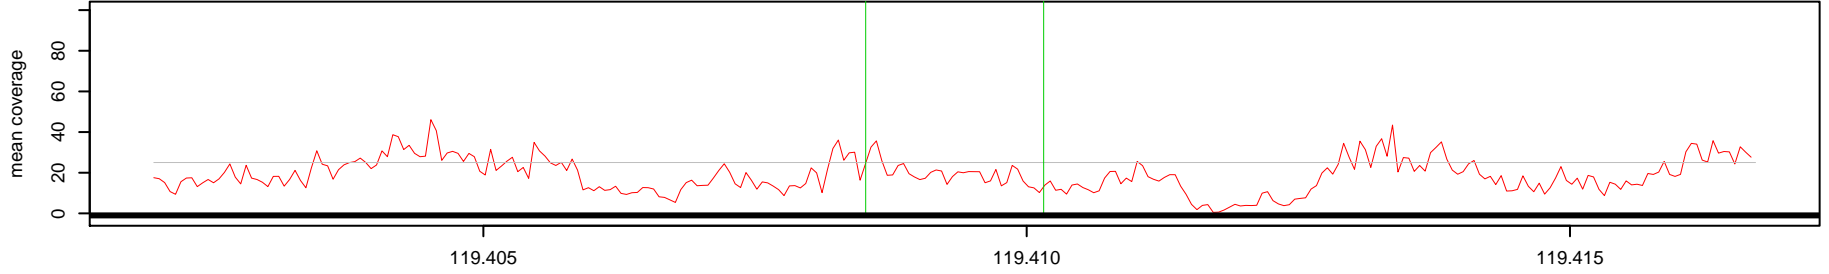

Log2( AK1 read depth / NA10851 read depth)

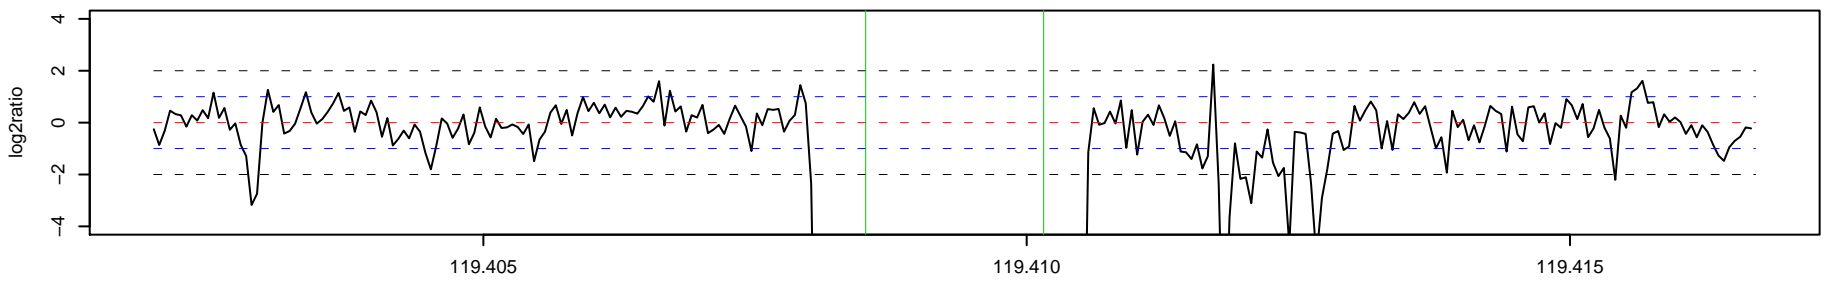

232 \_ AK1 Chr 5 : 127435743 – 127438829 , 3087 bp (aCGH relative log2ratio= -0.66 )

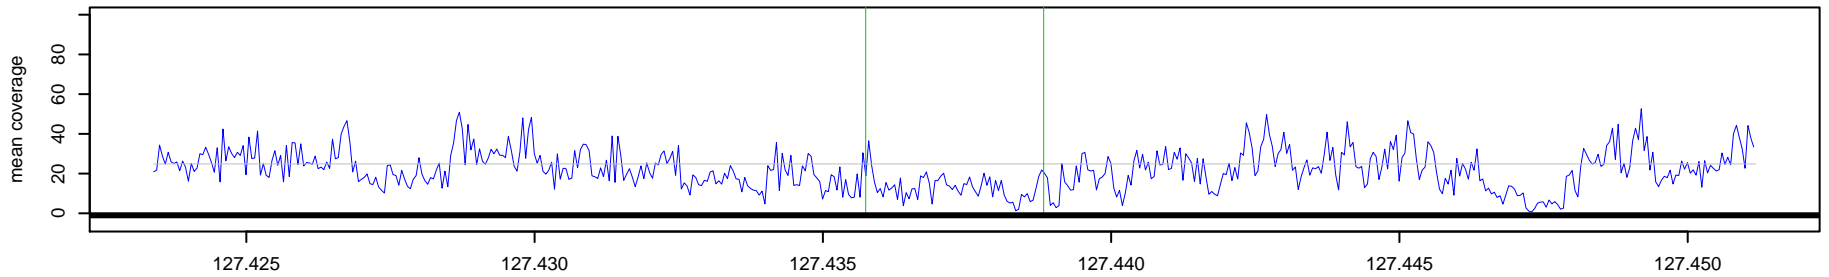

232 \_ NA10851 Chr 5 : 127435743 – 127438829 , 3087 bp (aCGH relative log2ratio= -0.66 )

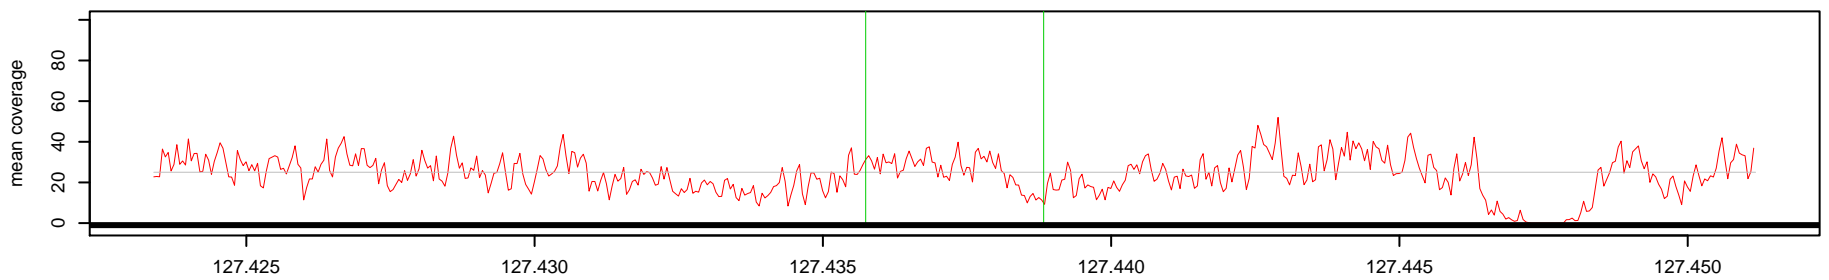

Log2( AK1 read depth / NA10851 read depth)

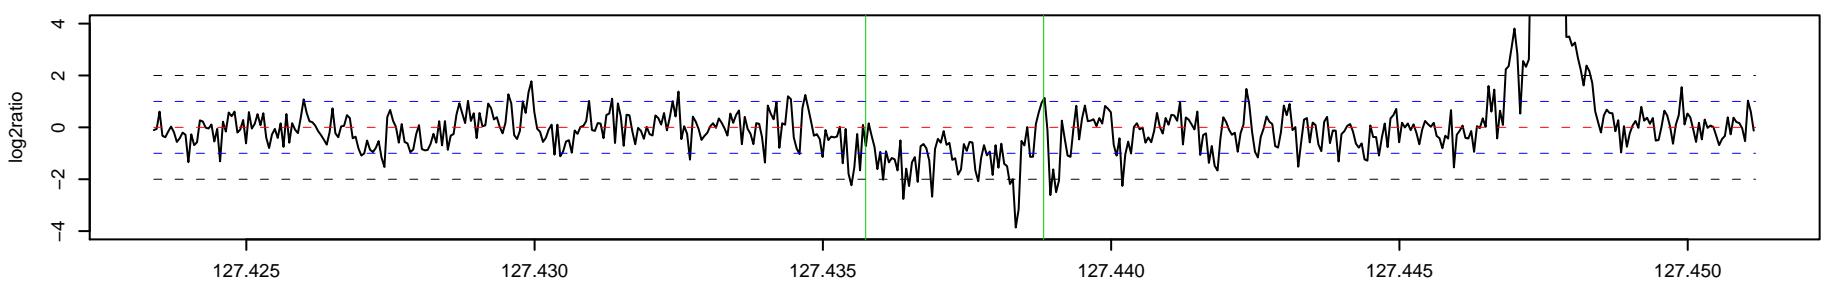



233 \_ AK1 Chr 5 : 128339509 – 128340210 , 702 bp (aCGH relative log2ratio= 0.50 )

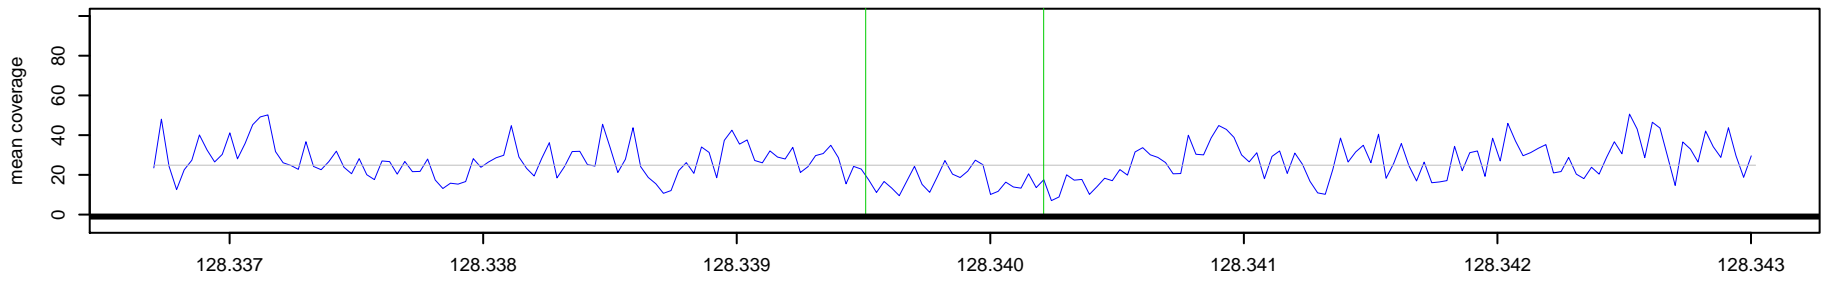

233 \_ NA10851 Chr 5 : 128339509 – 128340210 , 702 bp (aCGH relative log2ratio= 0.50 )

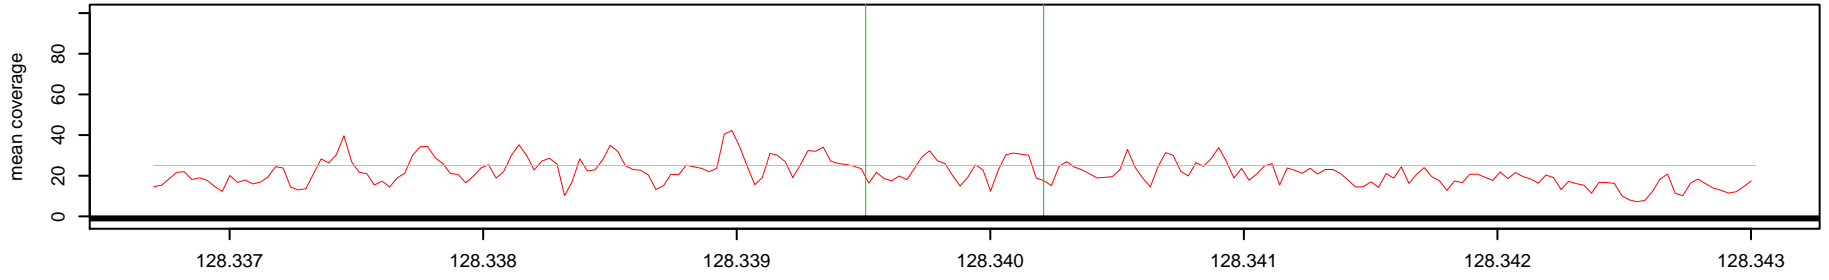

Log2( AK1 read depth / NA10851 read depth)

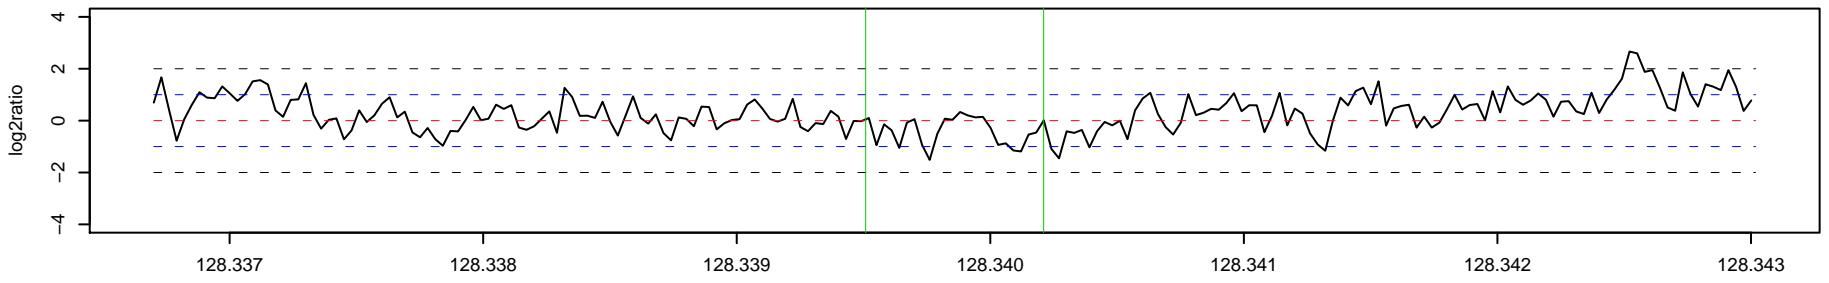

234 \_ AK1 Chr 5 : 133162893 – 133164384 , 1492 bp (aCGH relative log2ratio= 0.35 )

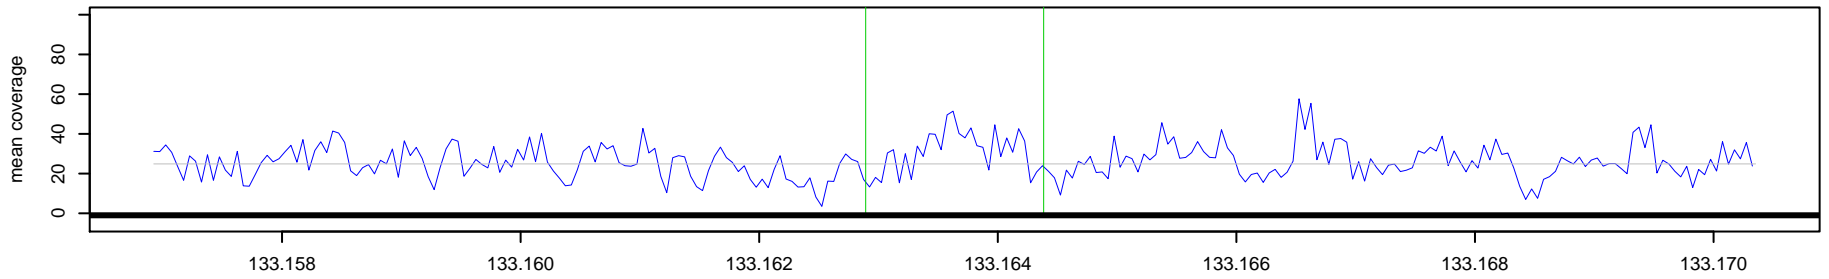

234 \_ NA10851 Chr 5 : 133162893 – 133164384 , 1492 bp (aCGH relative log2ratio= 0.35 )

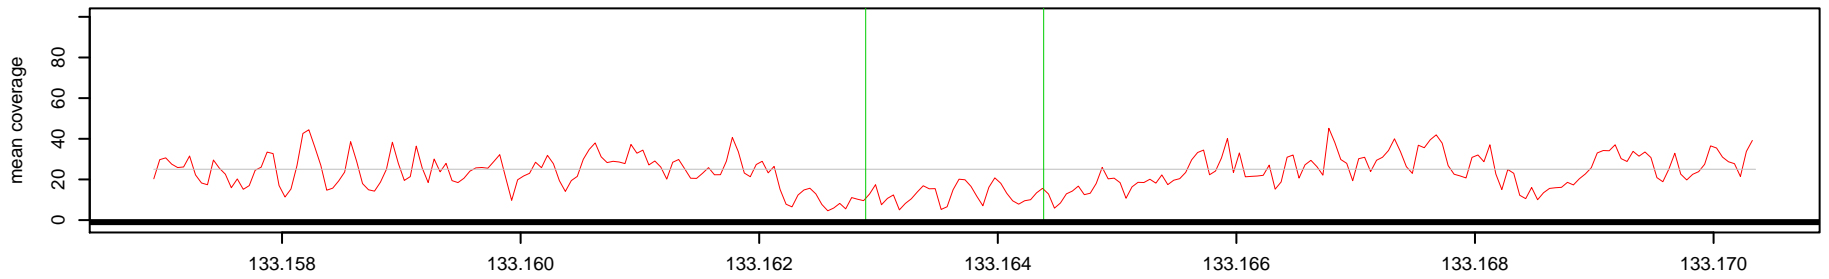

Log2( AK1 read depth / NA10851 read depth)

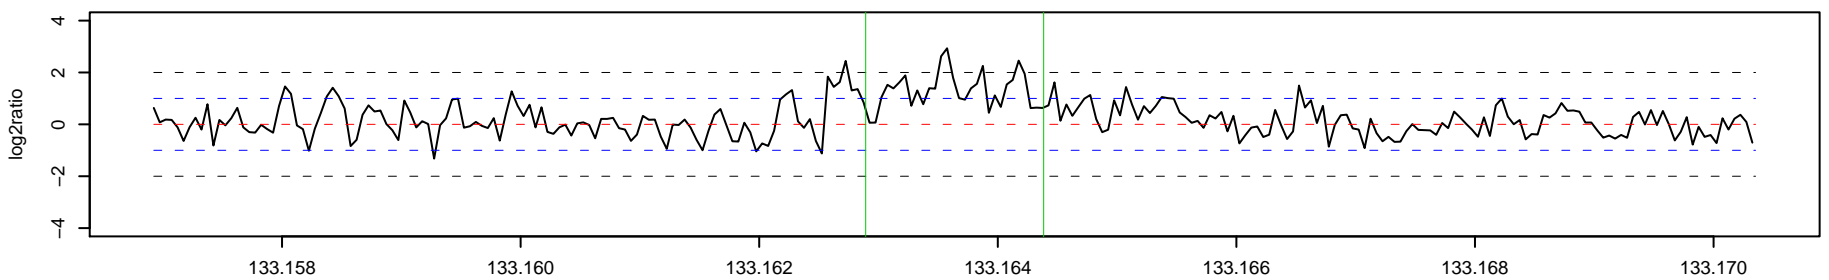

235 \_ AK1 Chr 5 : 134286865 – 134292157 , 5293 bp (aCGH relative log2ratio= -1.90 )

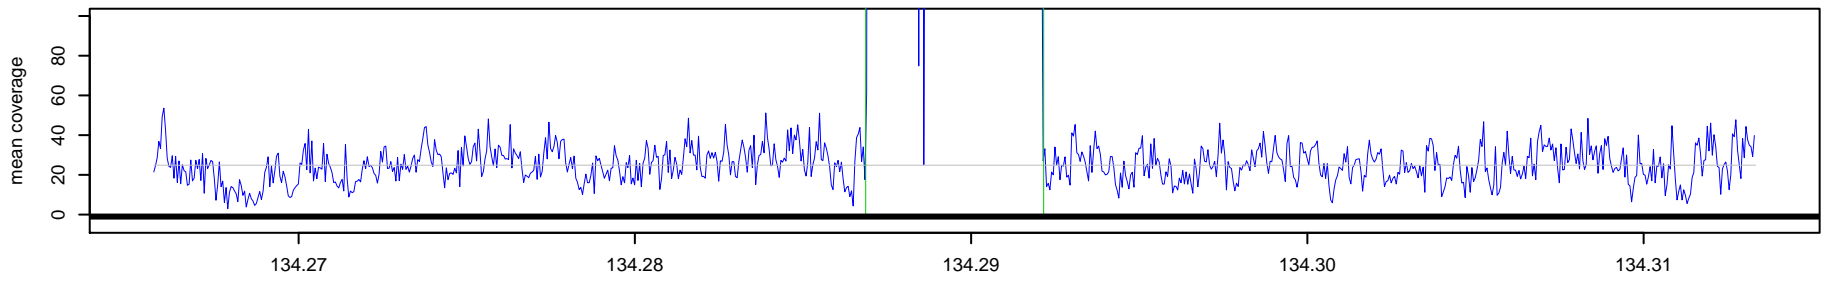

235 \_ NA10851 Chr 5 : 134286865 – 134292157 , 5293 bp (aCGH relative log2ratio= -1.90 )

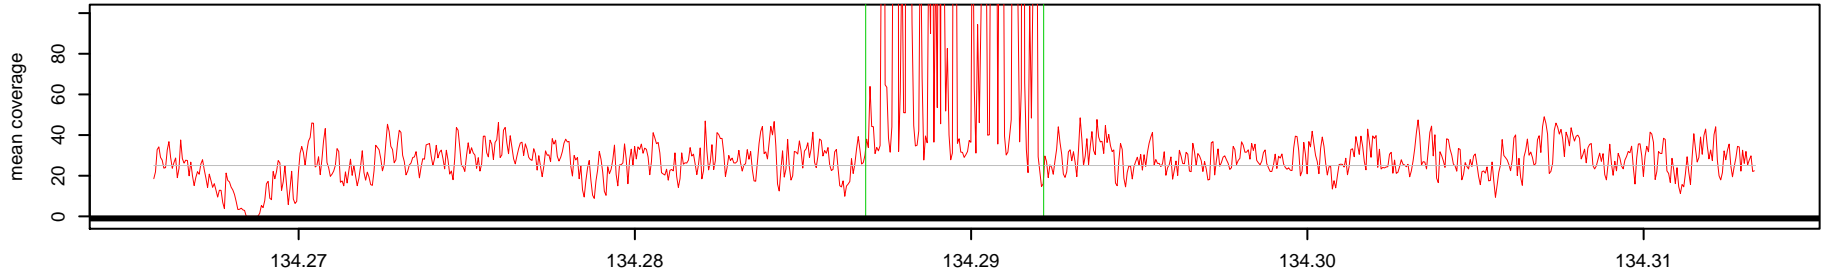

Log2( AK1 read depth / NA10851 read depth)

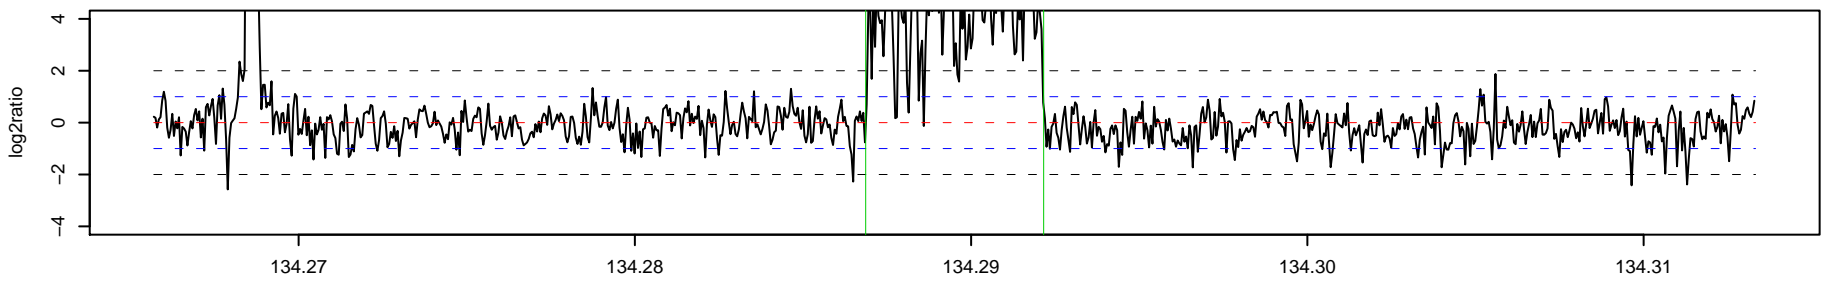

236 \_ AK1 Chr 5 : 137835383 – 137843356 , 7974 bp (aCGH relative log2ratio= 0.50 )

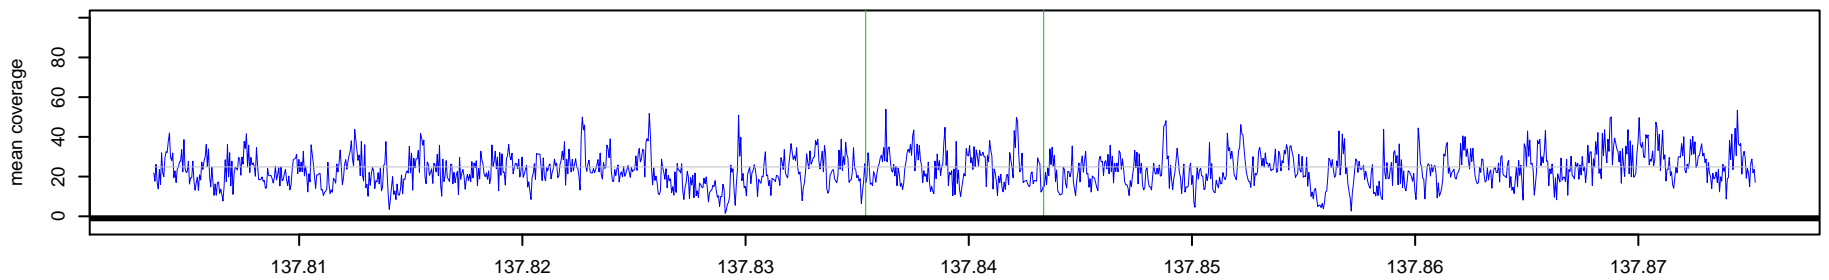

236 \_ NA10851 Chr 5 : 137835383 – 137843356 , 7974 bp (aCGH relative log2ratio= 0.50 )

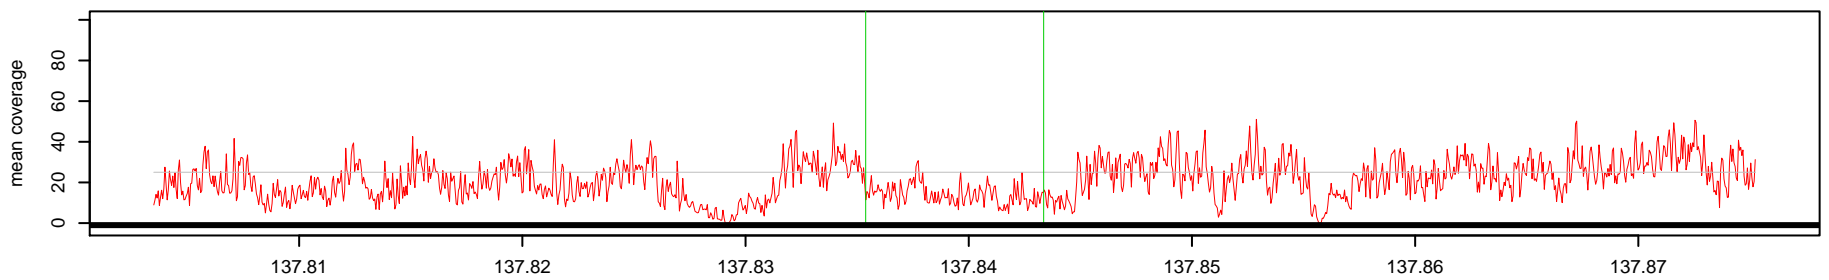

Log2( AK1 read depth / NA10851 read depth)

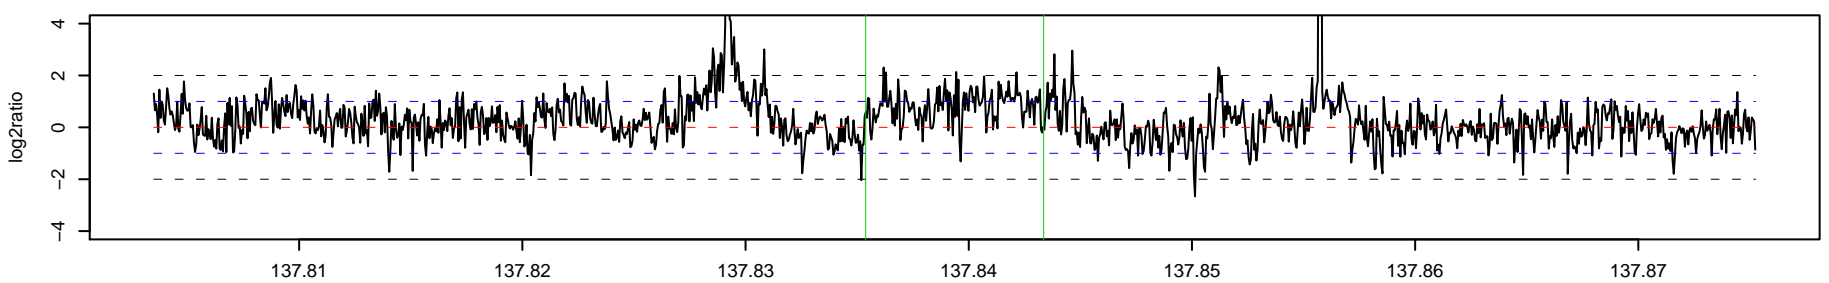

237 \_ AK1 Chr 5 : 140203413 – 140219200 , 15788 bp (aCGH relative log2ratio= 2.51 )

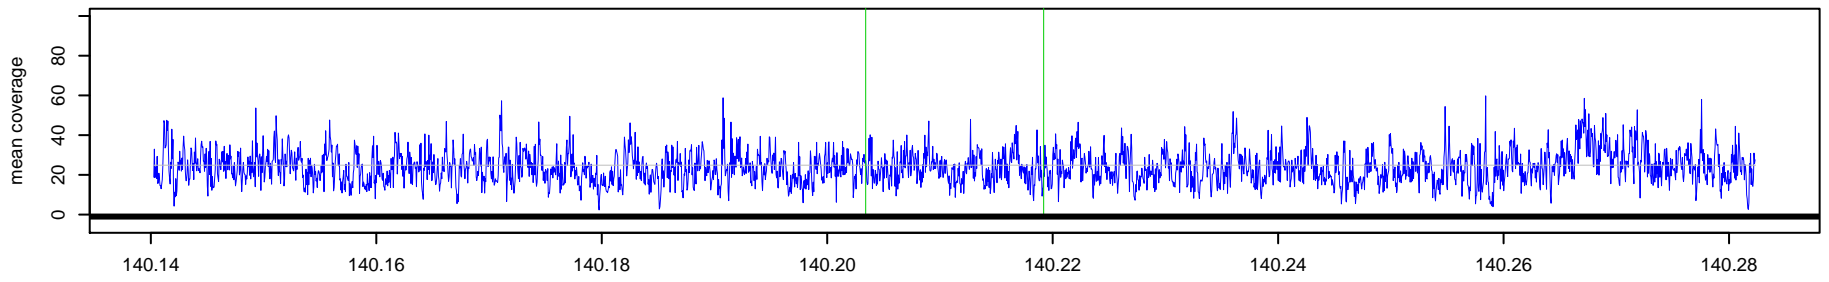

237 \_ NA10851 Chr 5 : 140203413 – 140219200 , 15788 bp (aCGH relative log2ratio= 2.51 )

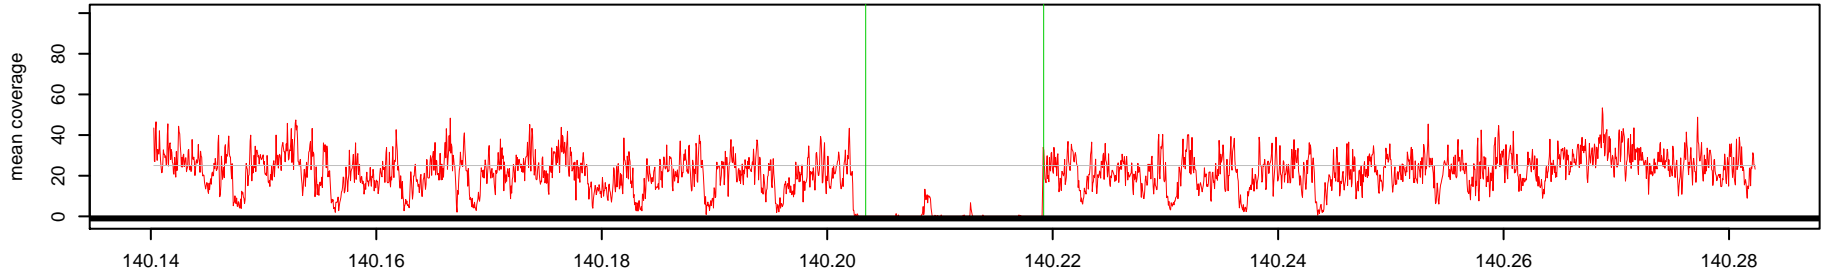

Log2( AK1 read depth / NA10851 read depth)

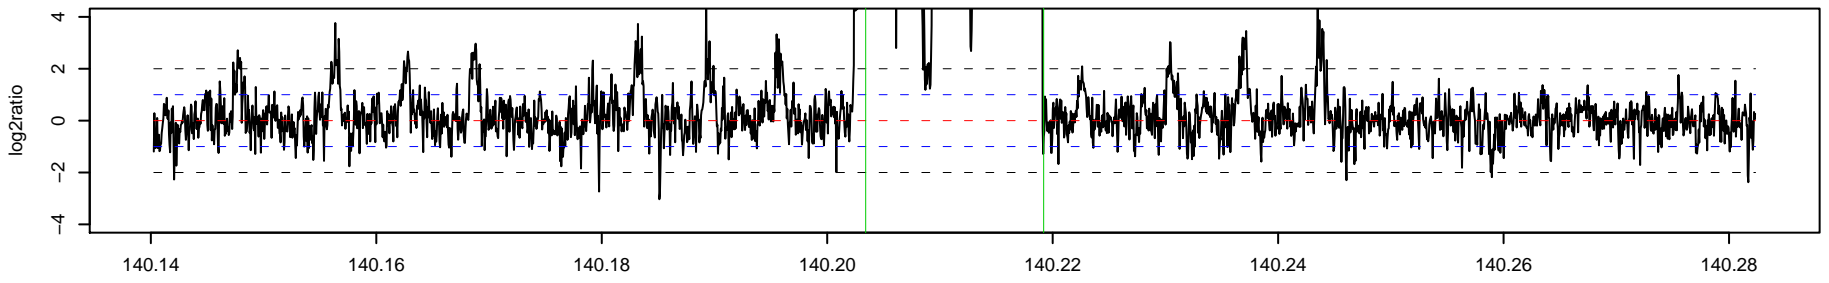

238 \_ AK1 Chr 5 : 140534913 – 140539095 , 4183 bp (aCGH relative log2ratio= 1.30 )

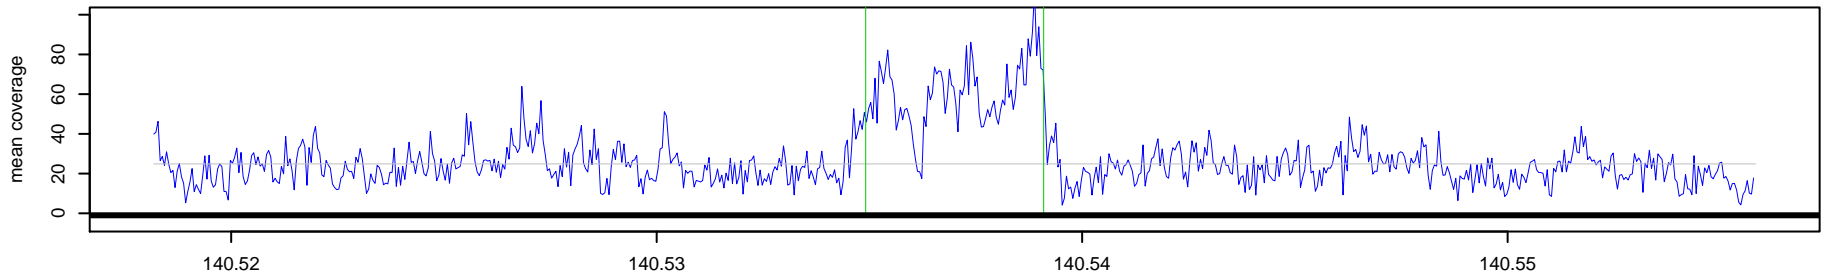

238 \_ NA10851 Chr 5 : 140534913 – 140539095 , 4183 bp (aCGH relative log2ratio= 1.30 )

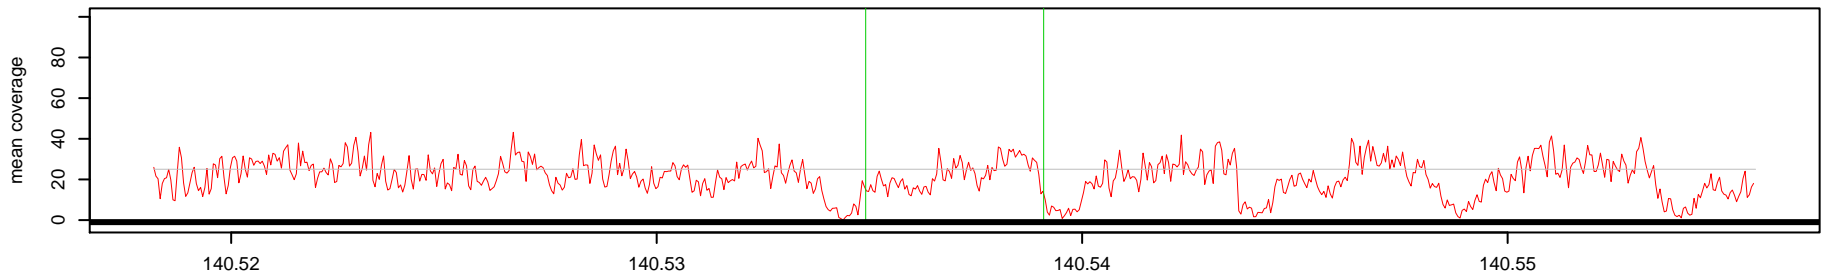

Log2( AK1 read depth / NA10851 read depth)

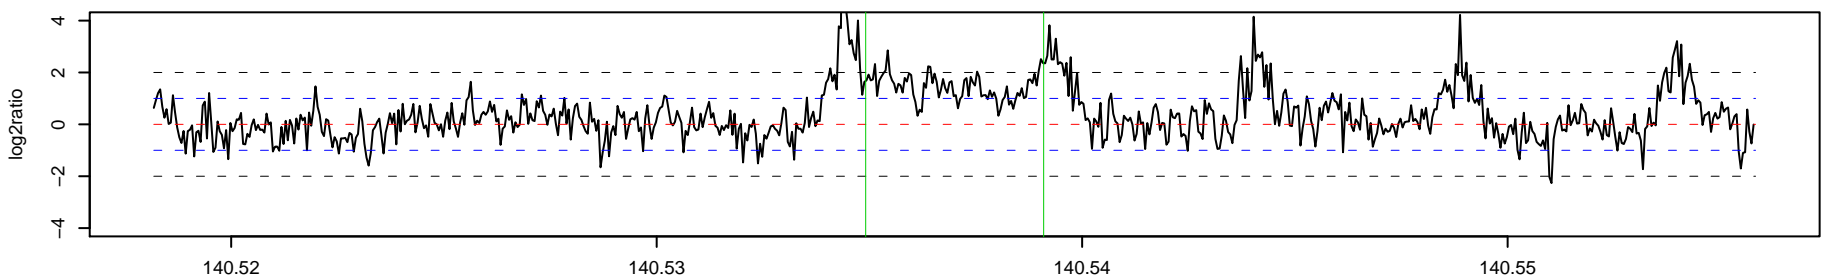

239 \_ AK1 Chr 5 : 140570734 – 140575098 , 4365 bp (aCGH relative log2ratio= 0.35 )

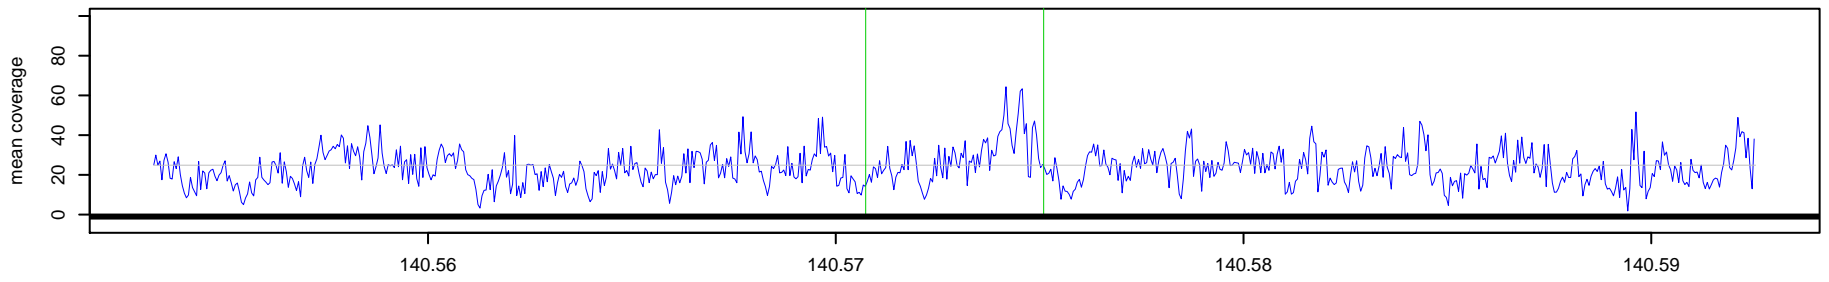

239 \_ NA10851 Chr 5 : 140570734 – 140575098 , 4365 bp (aCGH relative log2ratio= 0.35 )

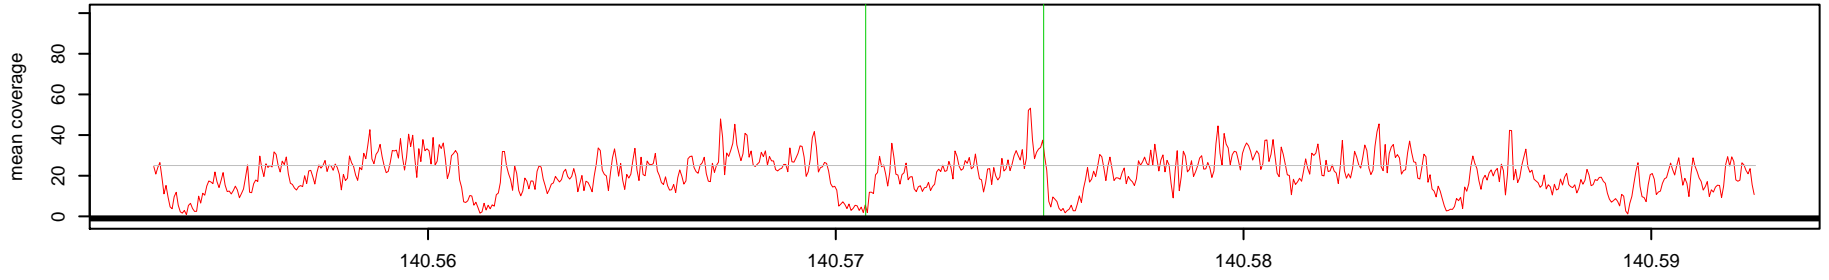

Log2( AK1 read depth / NA10851 read depth)

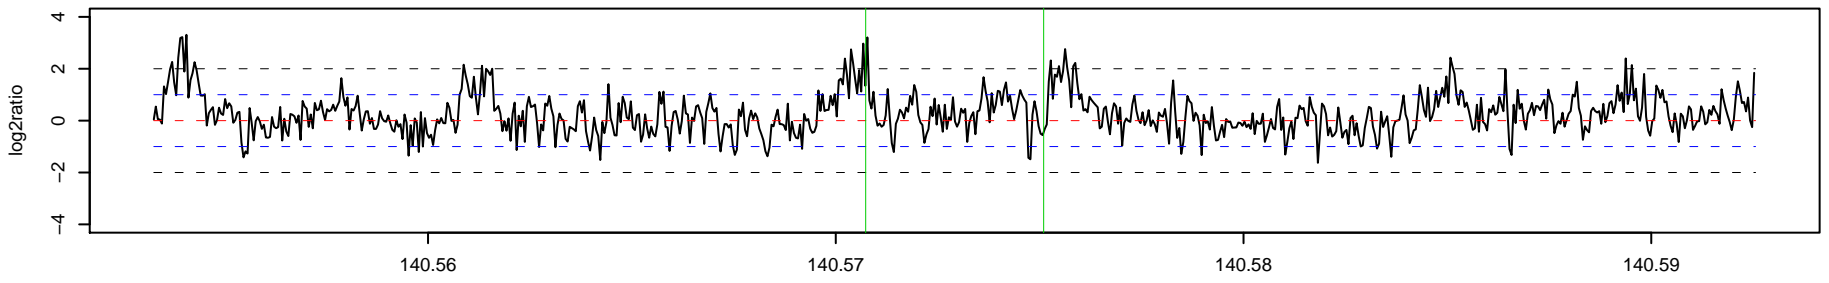

240 \_ AK1 Chr 5 : 146602838 – 146603311 , 474 bp (aCGH relative log2ratio= 1.09 )

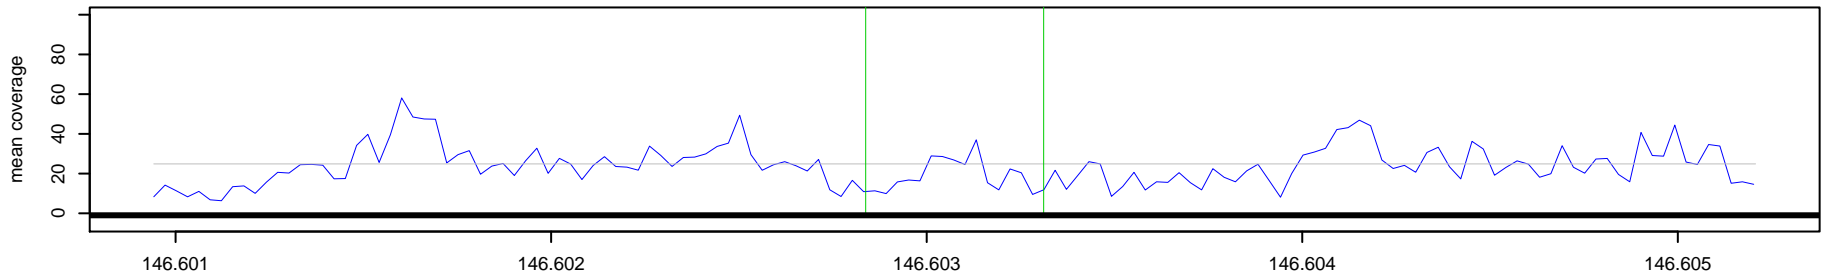

240 \_ NA10851 Chr 5 : 146602838 – 146603311 , 474 bp (aCGH relative log2ratio= 1.09 )

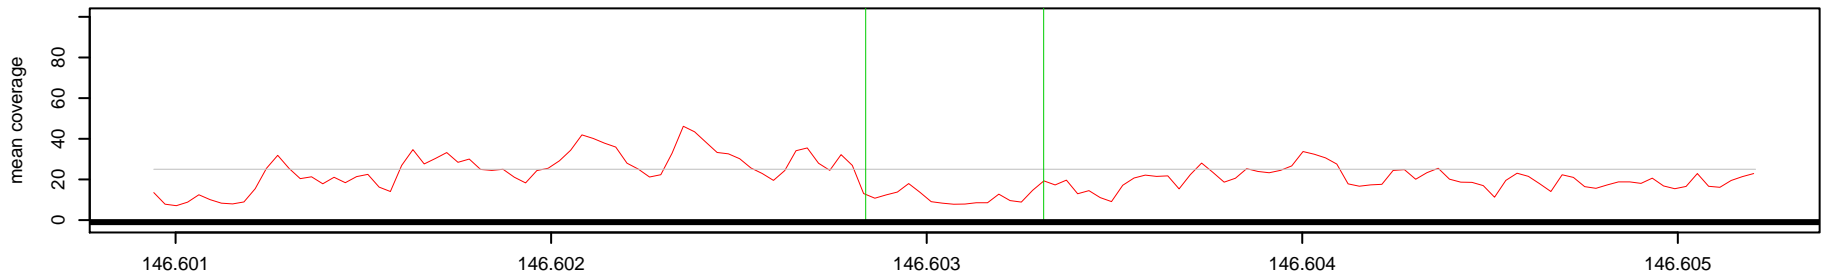

Log2( AK1 read depth / NA10851 read depth)

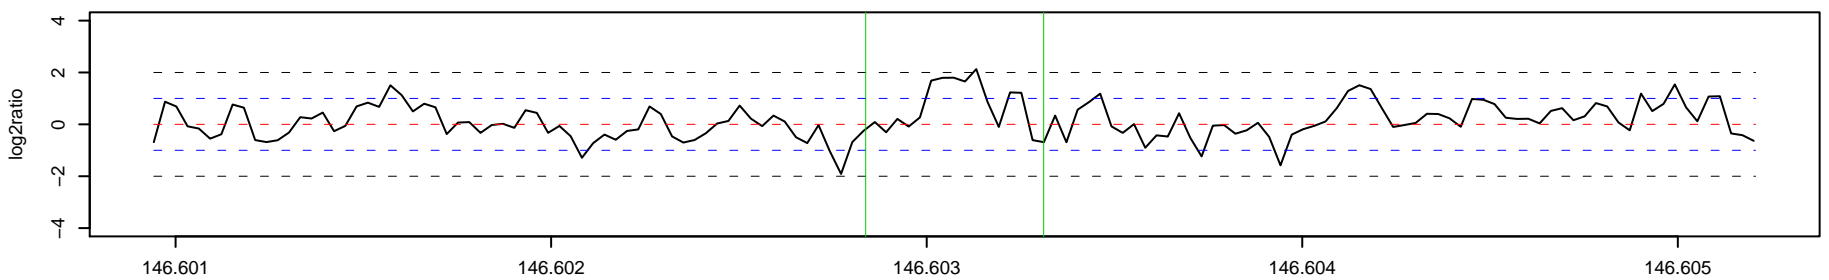

241 \_ AK1 Chr 5 : 147533200 – 147534362 , 1163 bp (aCGH relative log2ratio= 0.83 )

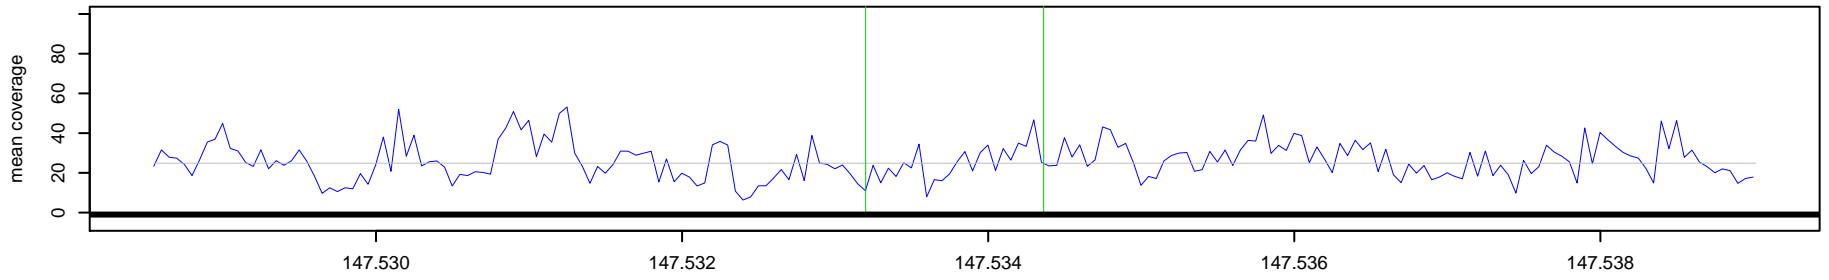

241 \_ NA10851 Chr 5 : 147533200 – 147534362 , 1163 bp (aCGH relative log2ratio= 0.83 )

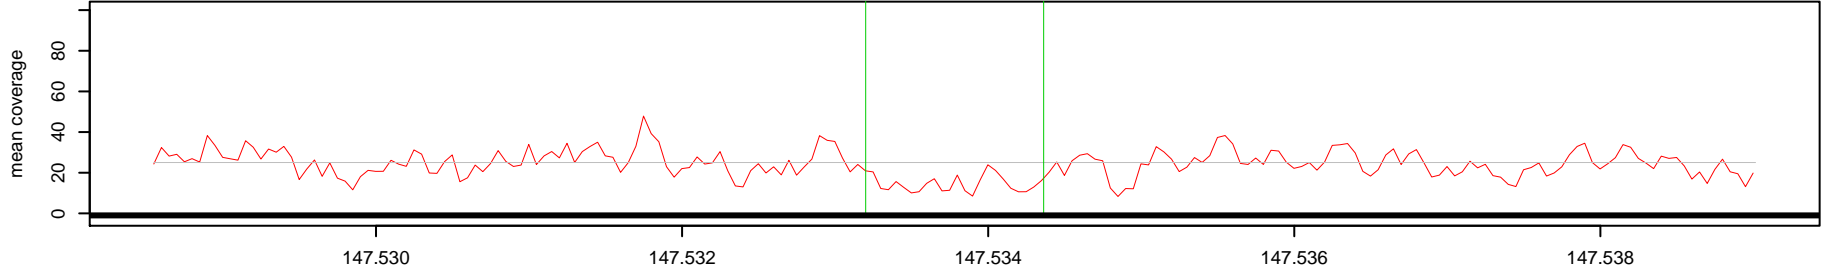

Log2( AK1 read depth / NA10851 read depth)

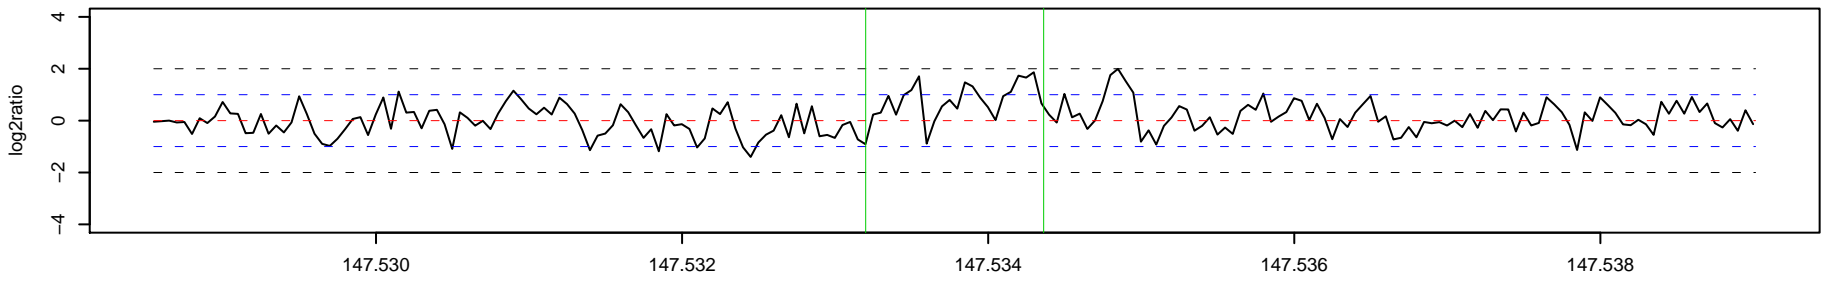

242 \_ AK1 Chr 5 : 150191420 – 150203058 , 11639 bp (aCGH relative log2ratio= -0.83 )

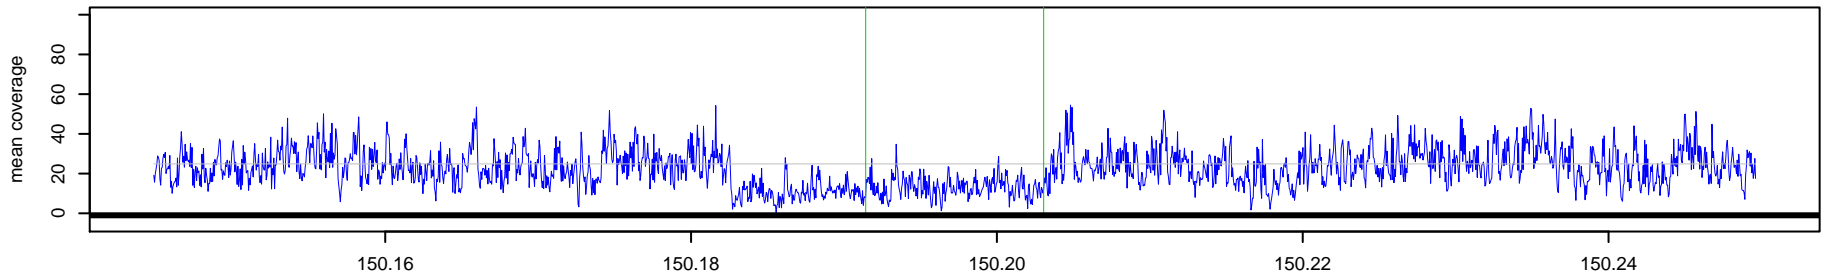

242 \_ NA10851 Chr 5 : 150191420 – 150203058 , 11639 bp (aCGH relative log2ratio= -0.83 )

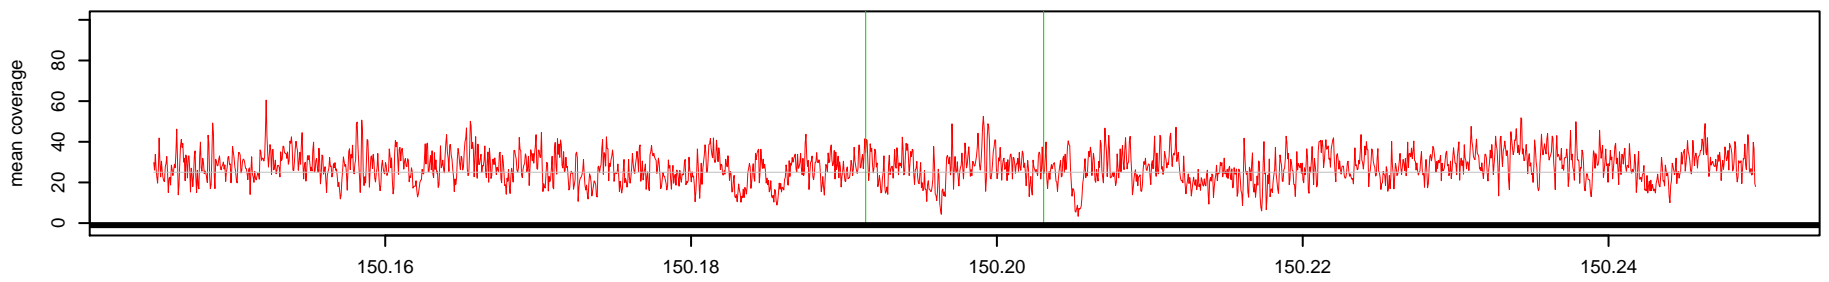

Log2( AK1 read depth / NA10851 read depth)

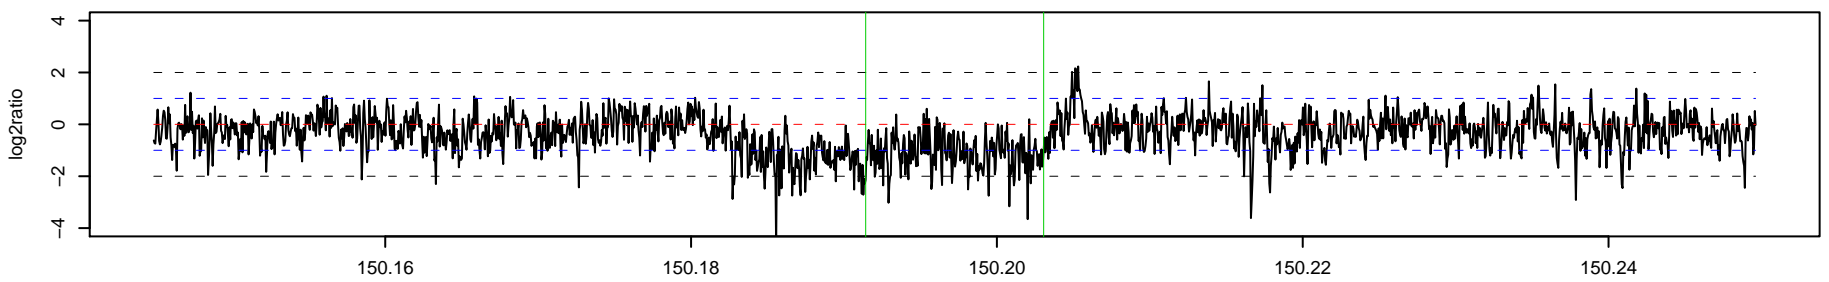

243 \_ AK1 Chr 5 : 150770054 – 150772928 , 2875 bp (aCGH relative log2ratio= -2.27 )

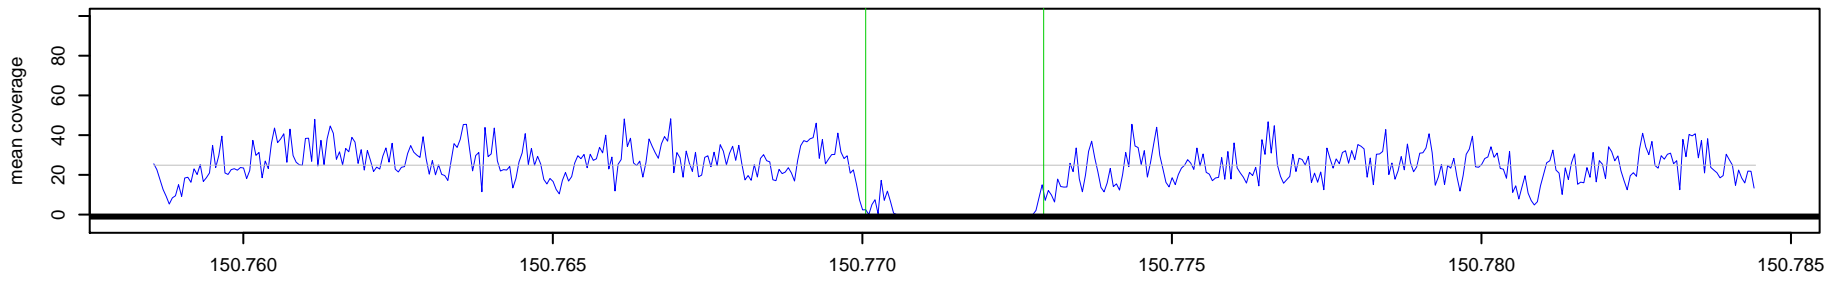

243 \_ NA10851 Chr 5 : 150770054 – 150772928 , 2875 bp (aCGH relative log2ratio= -2.27 )

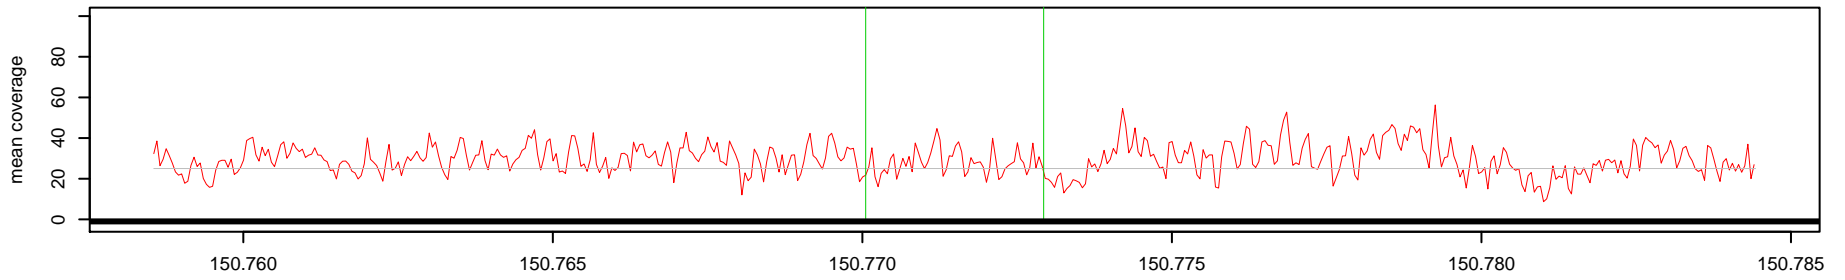

Log2( AK1 read depth / NA10851 read depth)

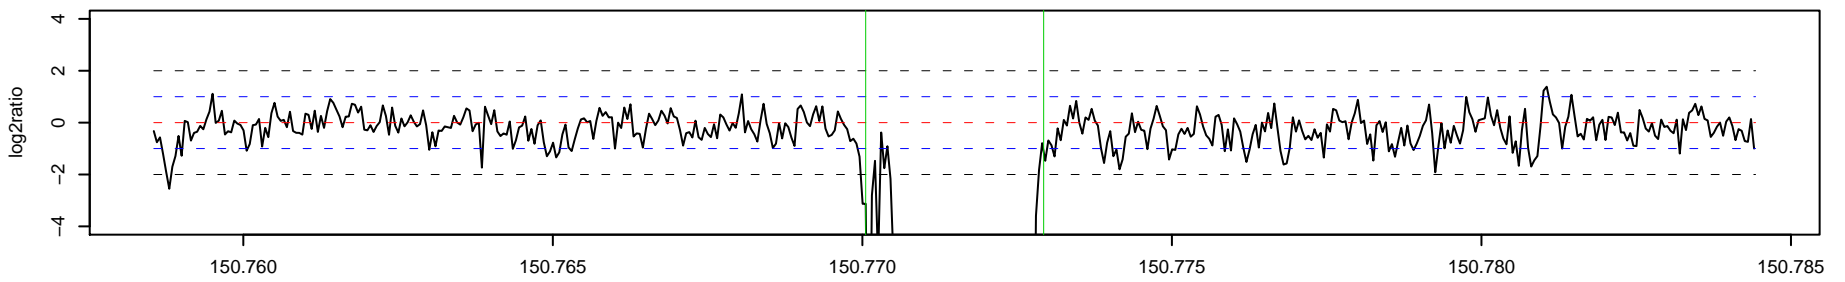

244 \_ AK1 Chr 5 : 155244353 – 155245204 , 852 bp (aCGH relative log2ratio= 0.81 )

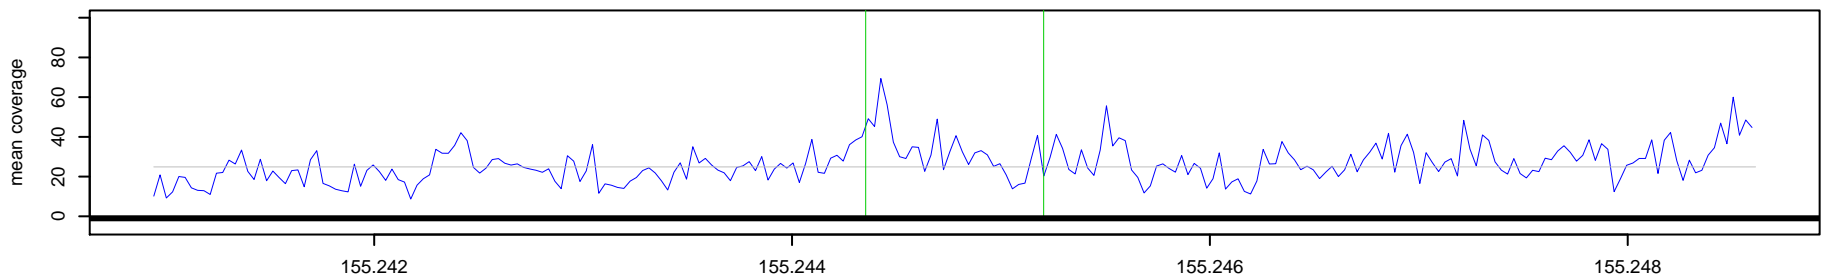

244 \_ NA10851 Chr 5 : 155244353 – 155245204 , 852 bp (aCGH relative log2ratio= 0.81 )

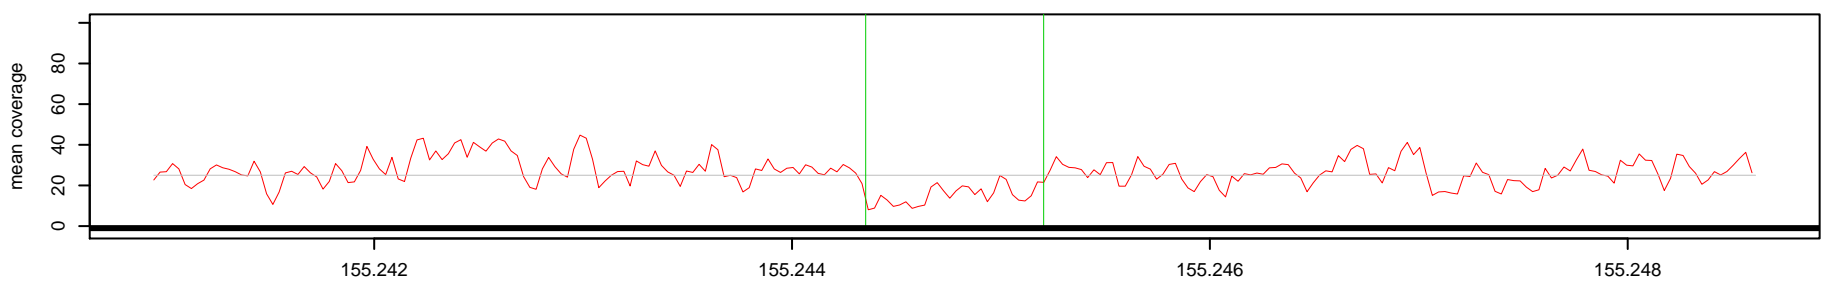

Log2( AK1 read depth / NA10851 read depth)

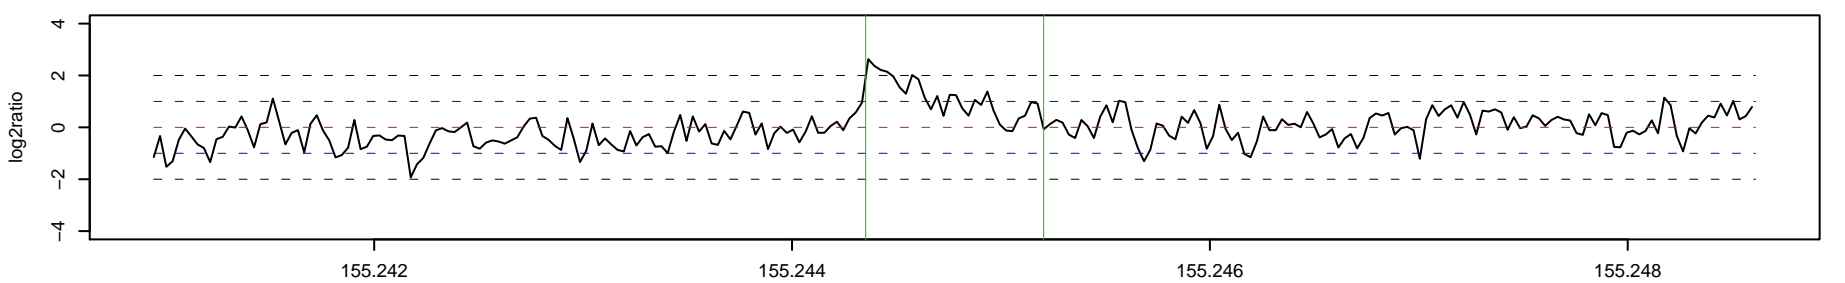

245 \_ AK1 Chr 5 : 162794360 – 162795897 , 1538 bp (aCGH relative log2ratio= -3.18 )

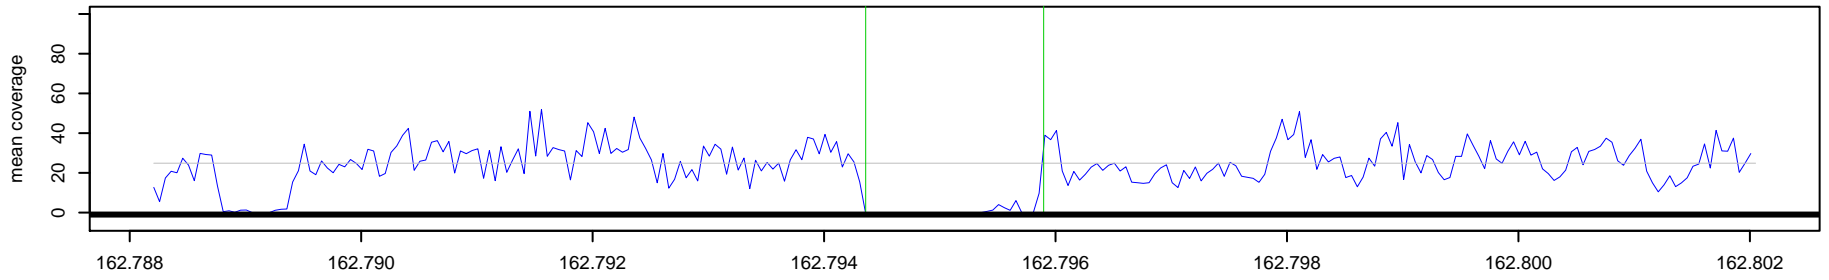

245 \_ NA10851 Chr 5 : 162794360 – 162795897 , 1538 bp (aCGH relative log2ratio= -3.18 )

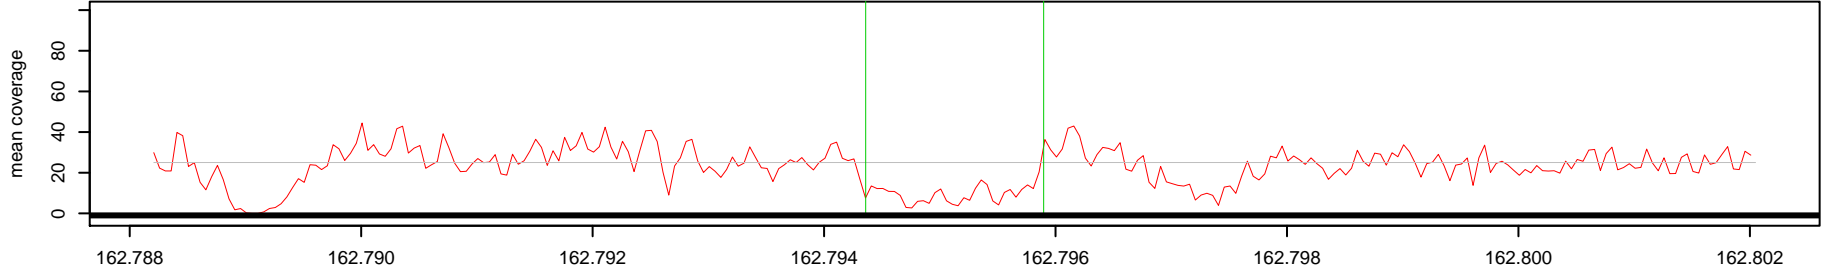

Log2( AK1 read depth / NA10851 read depth)

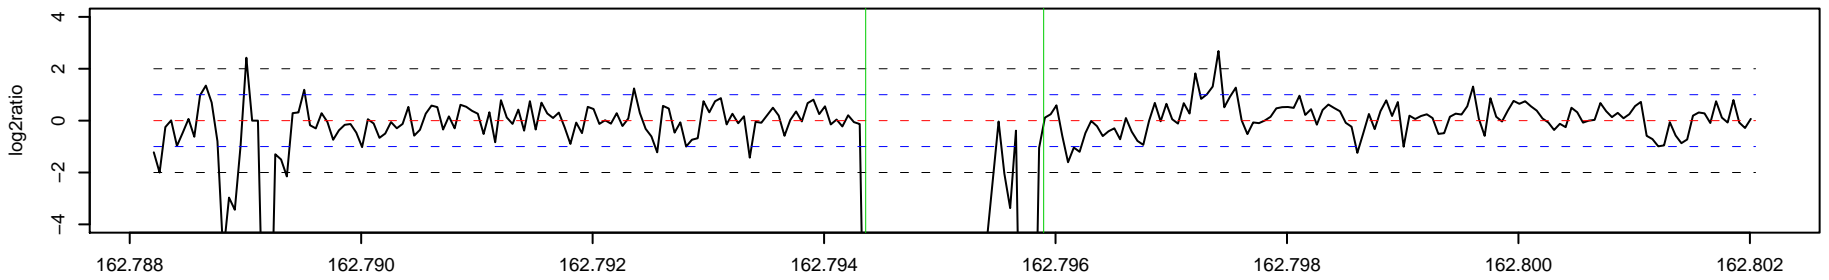

246 \_ AK1 Chr 5 : 178281747 – 178284305 , 2559 bp (aCGH relative log2ratio= 0.77 )

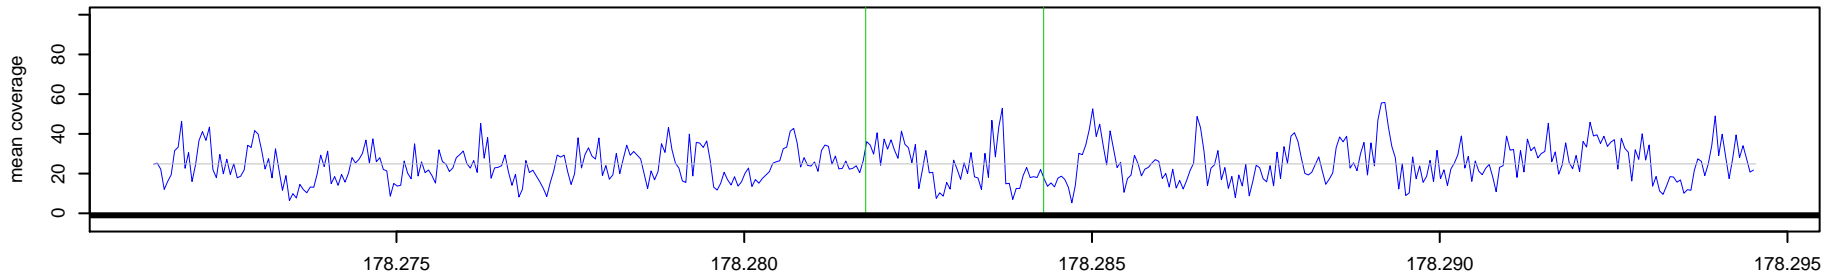

246 \_ NA10851 Chr 5 : 178281747 – 178284305 , 2559 bp (aCGH relative log2ratio= 0.77 )

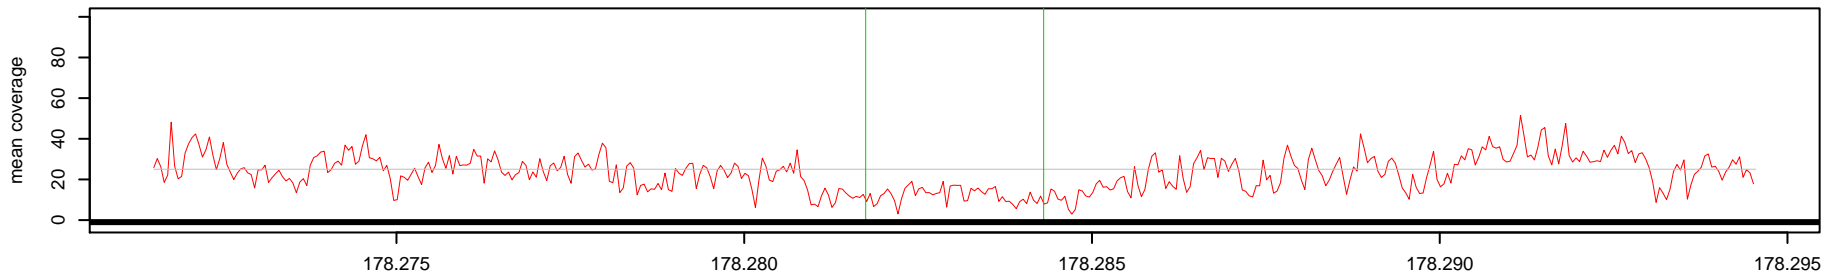

Log2( AK1 read depth / NA10851 read depth)

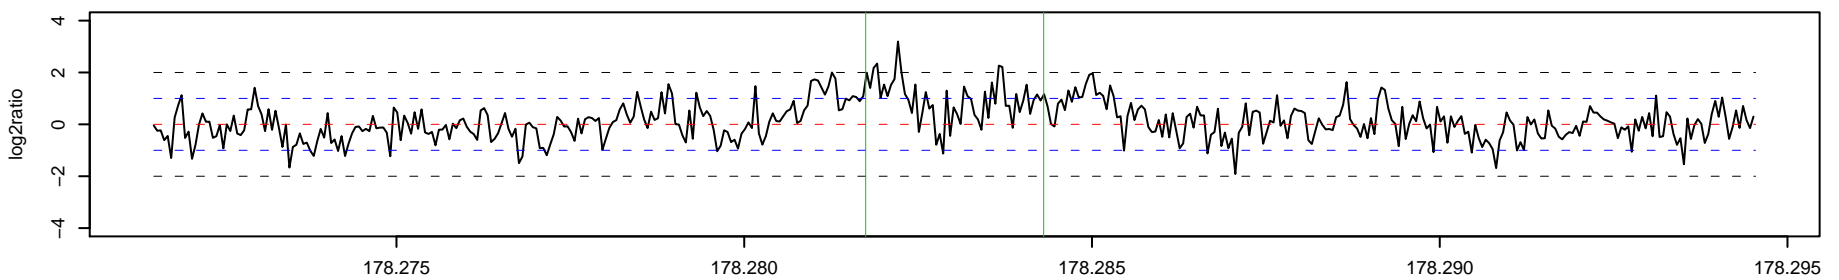

247\_AK1 Chr 5 : 180343358 – 180363271 , 19914 bp (aCGH relative log2ratio= -1.40)

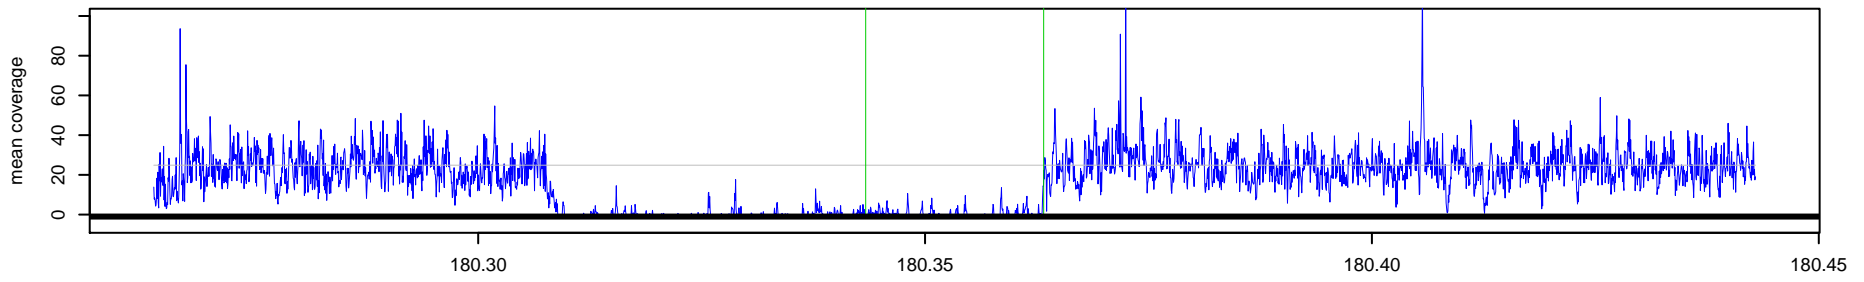

247\_NA10851 Chr 5 : 180343358 – 180363271 , 19914 bp (aCGH relative log2ratio= -1.40)

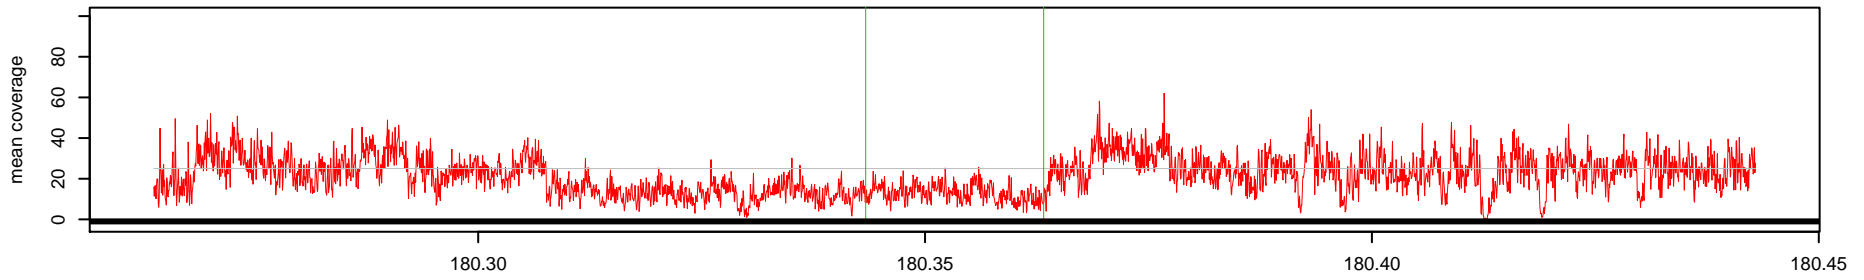

Log2( AK1 read depth / NA10851 read depth)

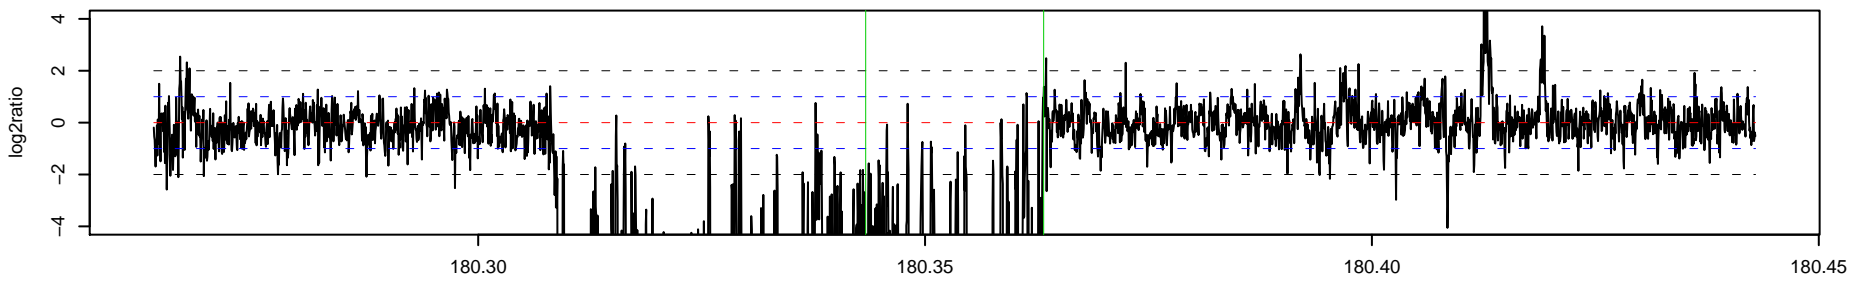

248\_AK1 Chr 6 : 1340434 – 1340894 , 461 bp (aCGH relative log2ratio= 0.29)

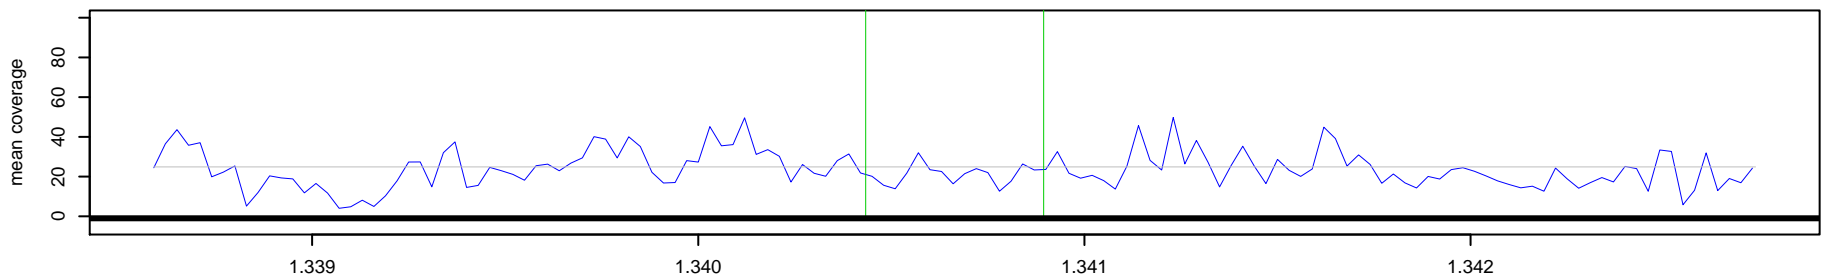

248\_NA10851 Chr 6 : 1340434 – 1340894 , 461 bp (aCGH relative log2ratio= 0.29)

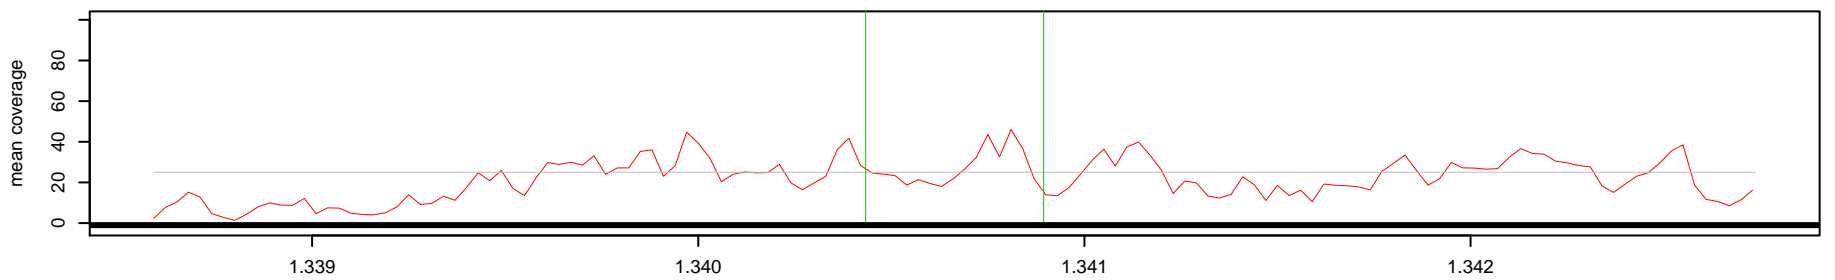

Log2( AK1 read depth / NA10851 read depth)

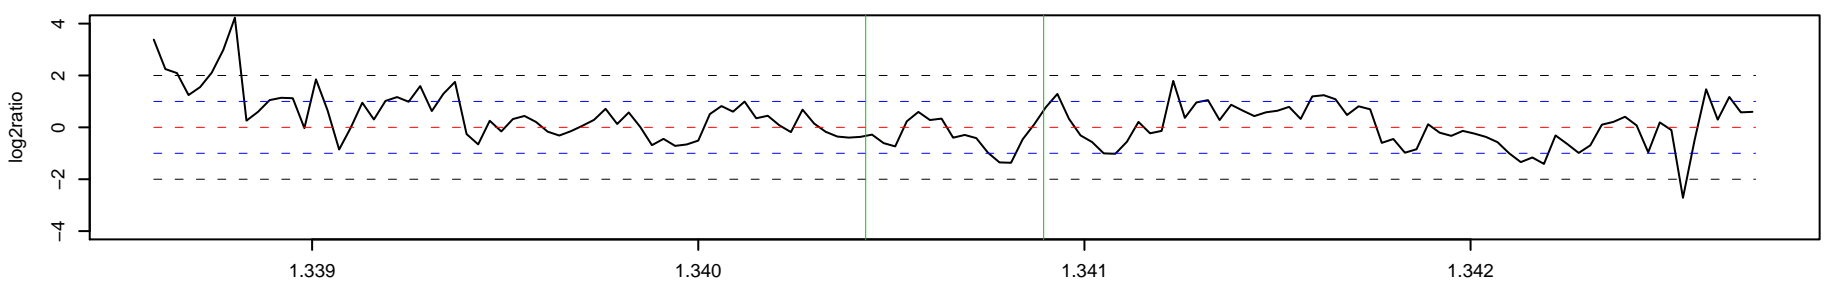



249\_AK1 Chr 6 : 9596869 – 9597344 , 476 bp (aCGH relative log2ratio= 0.53 )

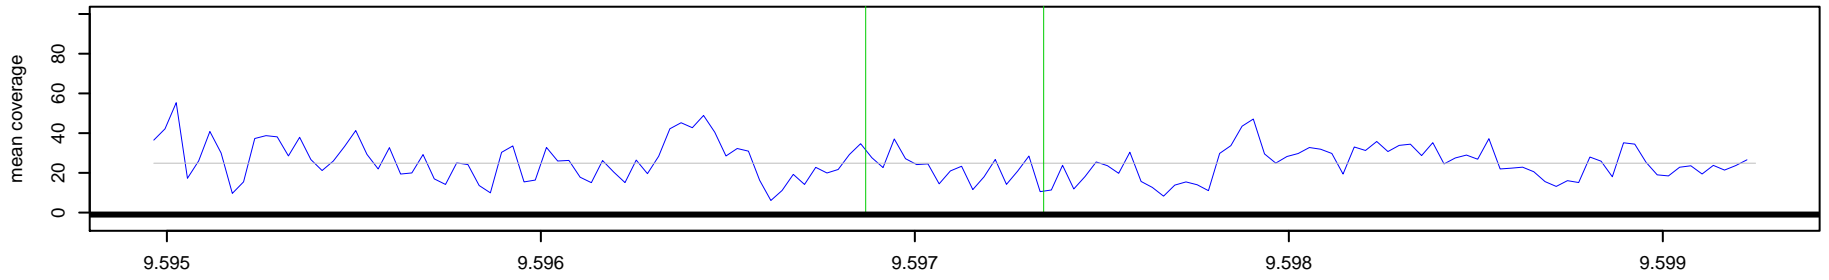

249\_NA10851 Chr 6 : 9596869 – 9597344 , 476 bp (aCGH relative log2ratio= 0.53 )

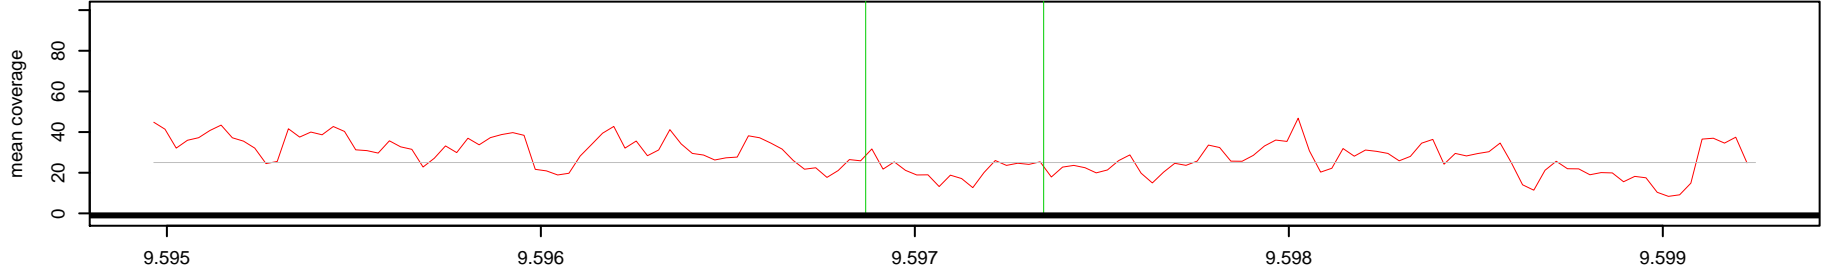

Log2( AK1 read depth / NA10851 read depth)

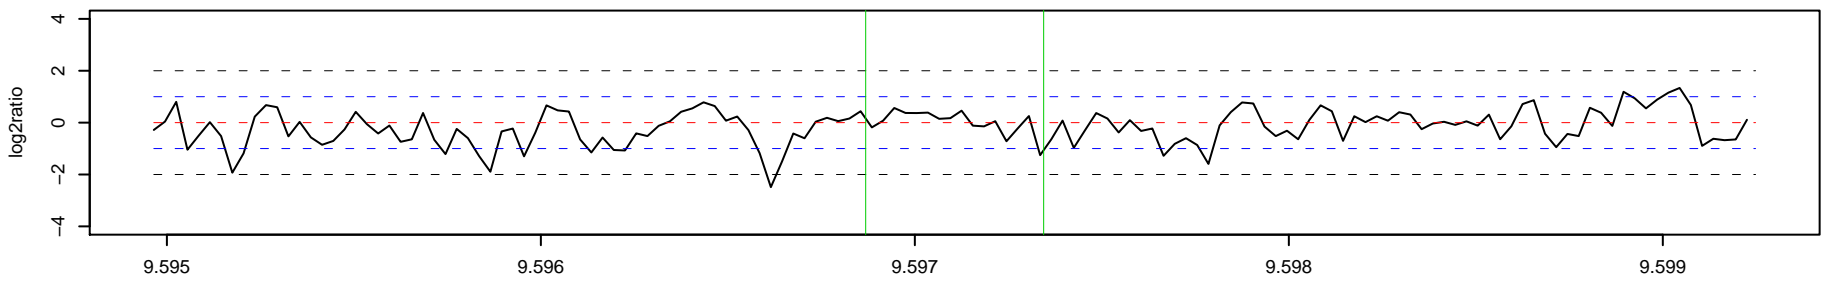

250\_AK1 Chr 6 : 14488275 – 14489152 , 878 bp (aCGH relative log2ratio= -0.95 )

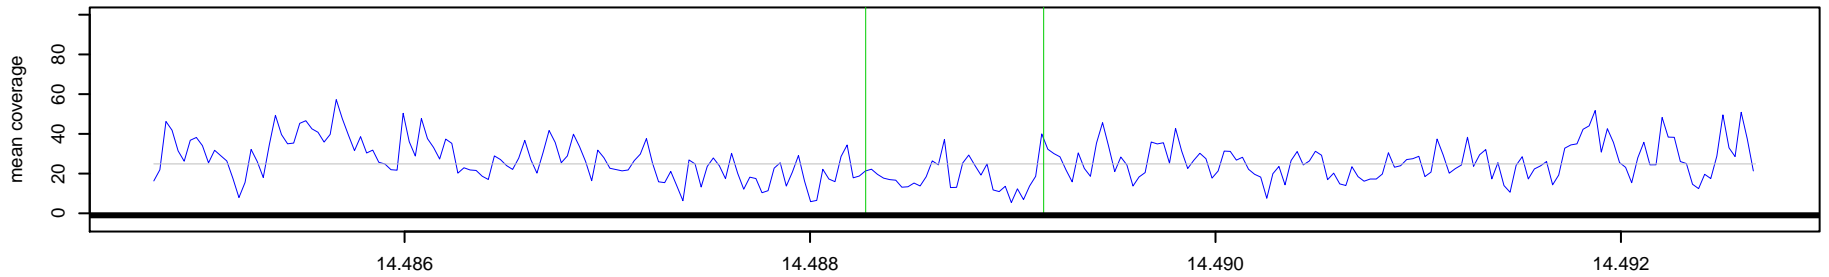

250\_NA10851 Chr 6 : 14488275 – 14489152 , 878 bp (aCGH relative log2ratio= -0.95 )

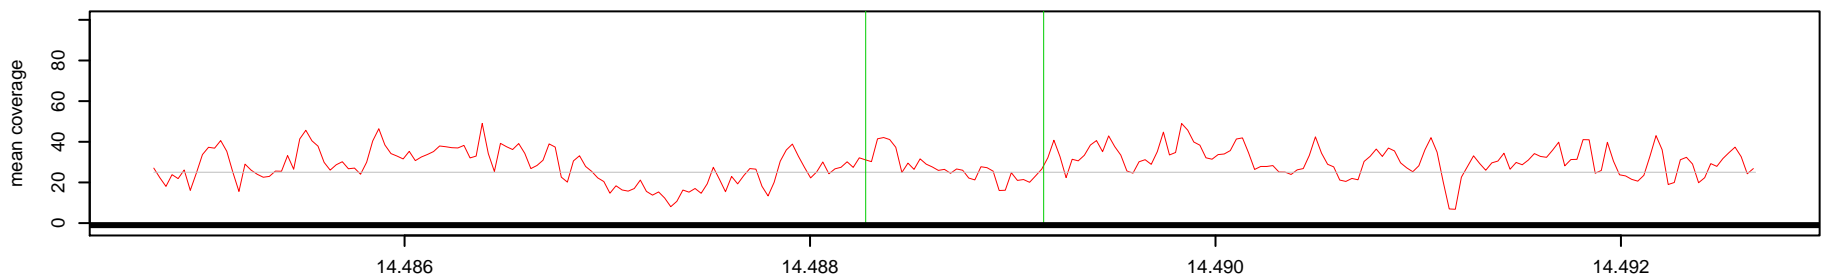

Log2( AK1 read depth / NA10851 read depth)

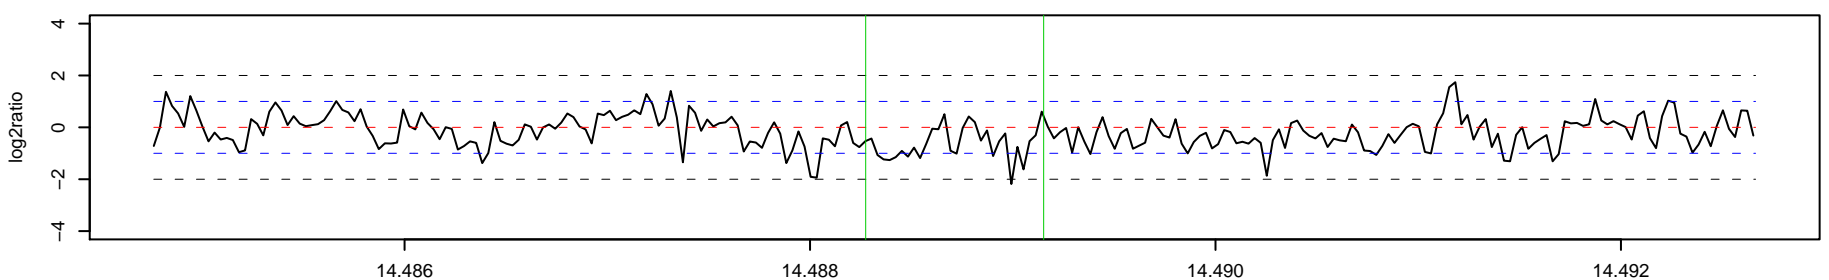

251 \_ AK1 Chr 6 : 15283308 – 15285820 , 2513 bp (aCGH relative log2ratio= -0.94 )

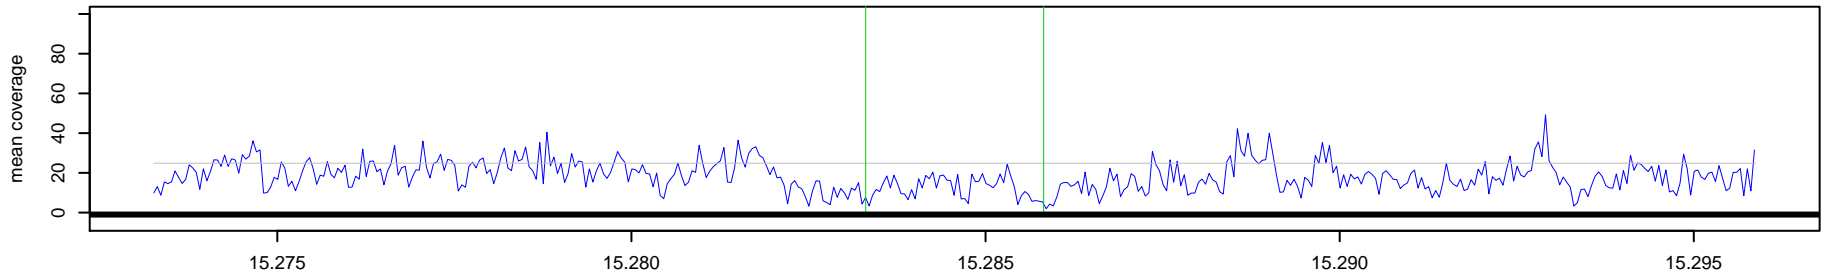

251 \_ NA10851 Chr 6 : 15283308 – 15285820 , 2513 bp (aCGH relative log2ratio= -0.94 )

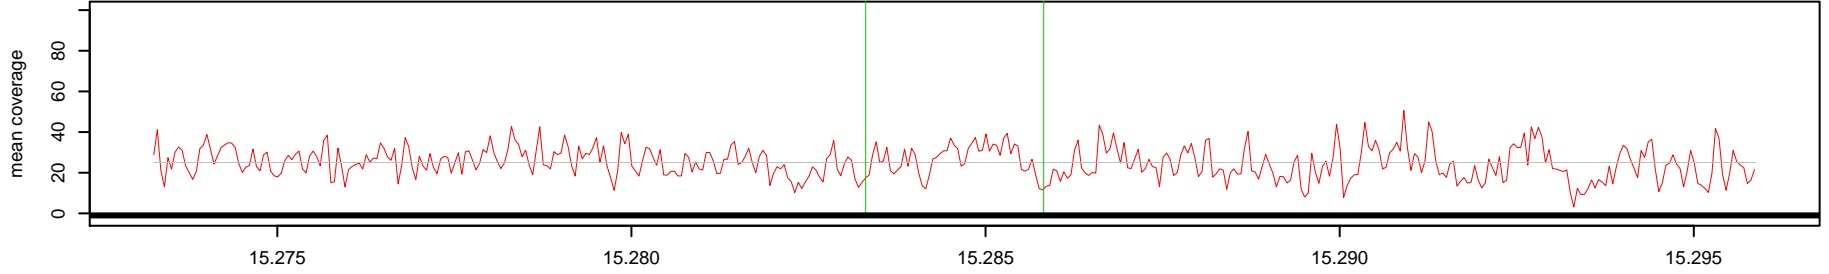

Log2( AK1 read depth / NA10851 read depth)

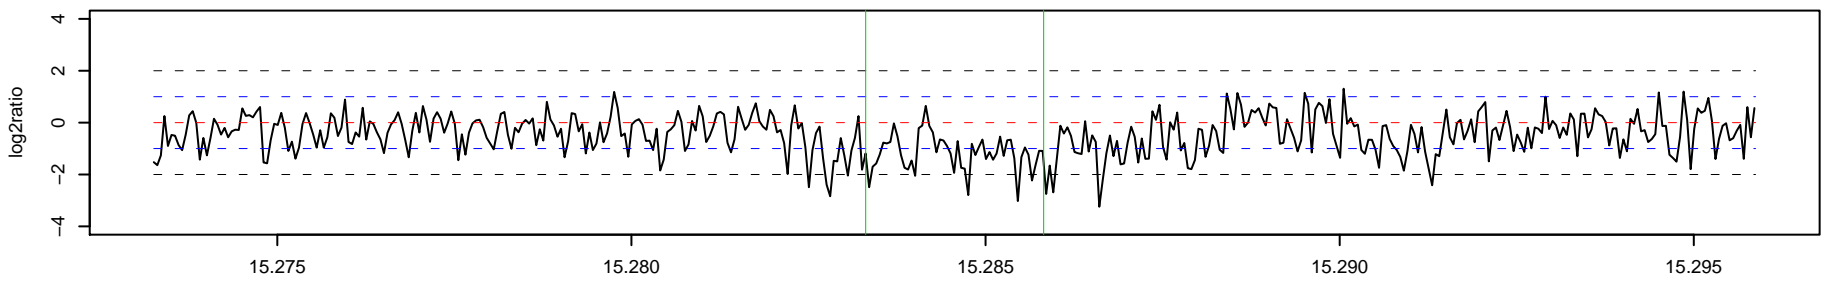

o

o

252 \_ AK1 Chr 6 : 22158952 – 22160767 , 1816 bp (aCGH relative log2ratio= -0.92 )

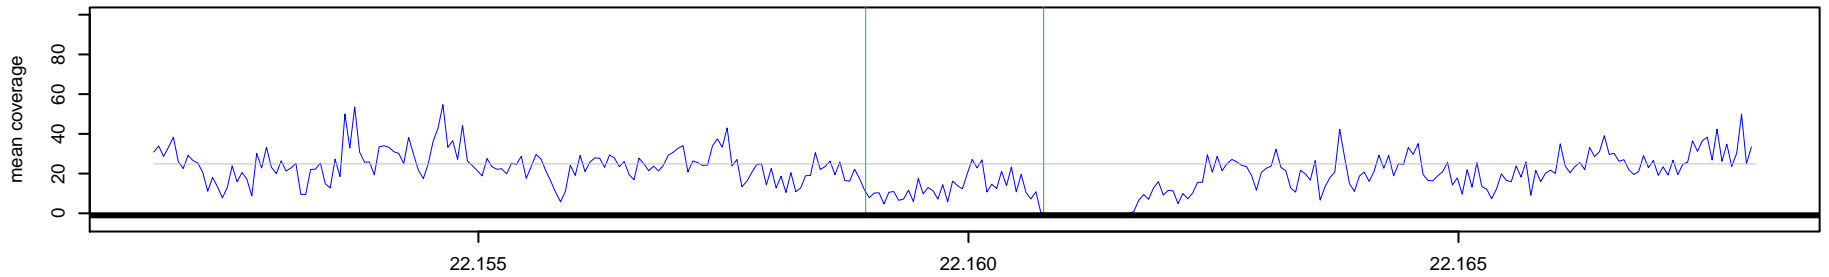

252 \_ NA10851 Chr 6 : 22158952 – 22160767 , 1816 bp (aCGH relative log2ratio= -0.92 )

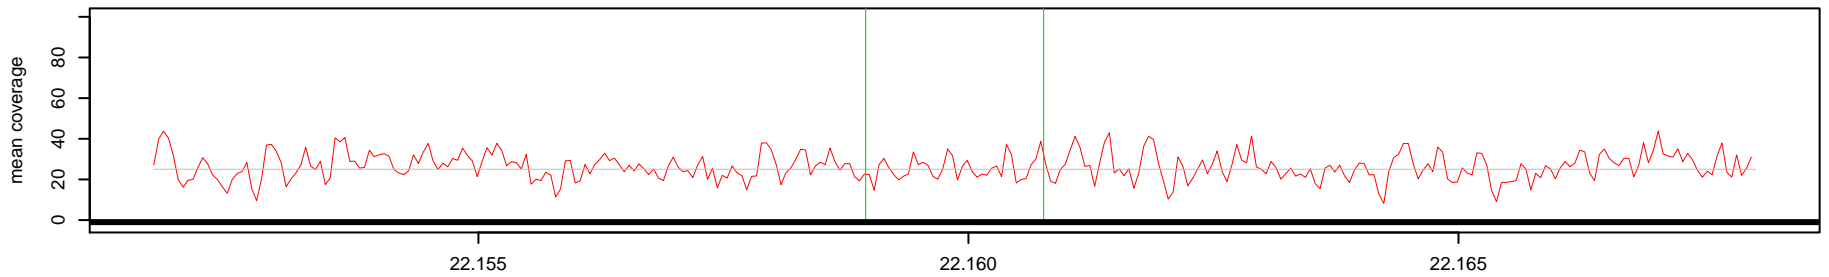

Log2( AK1 read depth / NA10851 read depth)

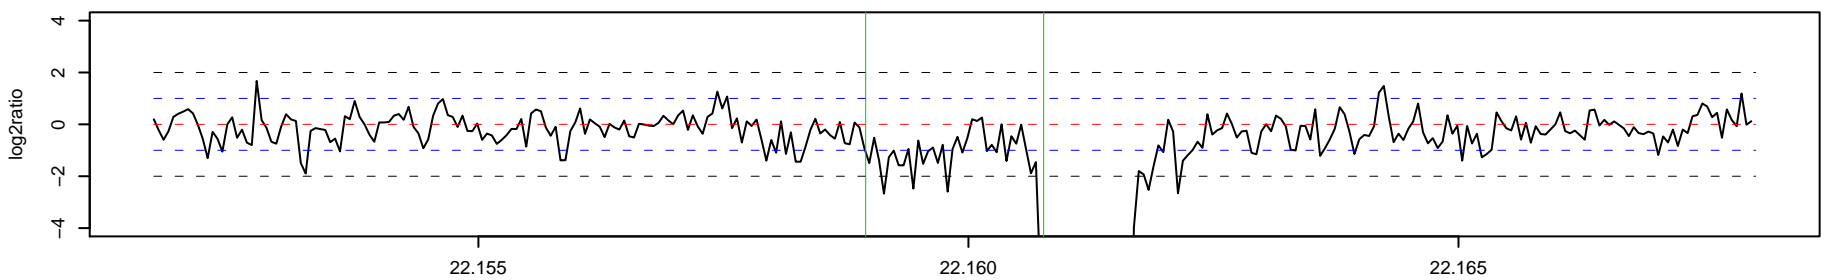

22.155

22.160

22.165

253 \_ AK1 Chr 6 : 22160767 – 22161680 , 914 bp (aCGH relative log2ratio= -4.40 )

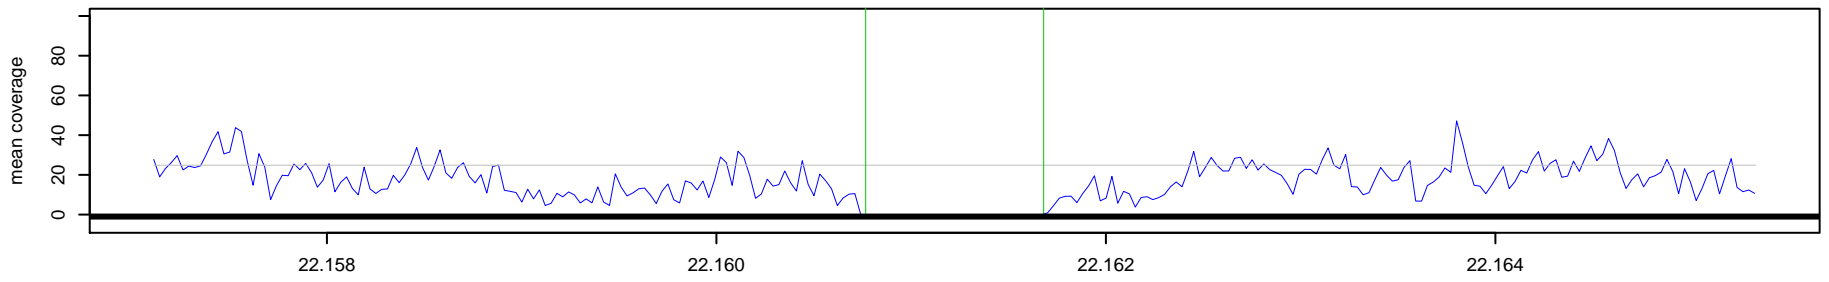

253 \_ NA10851 Chr 6 : 22160767 – 22161680 , 914 bp (aCGH relative log2ratio= -4.40 )

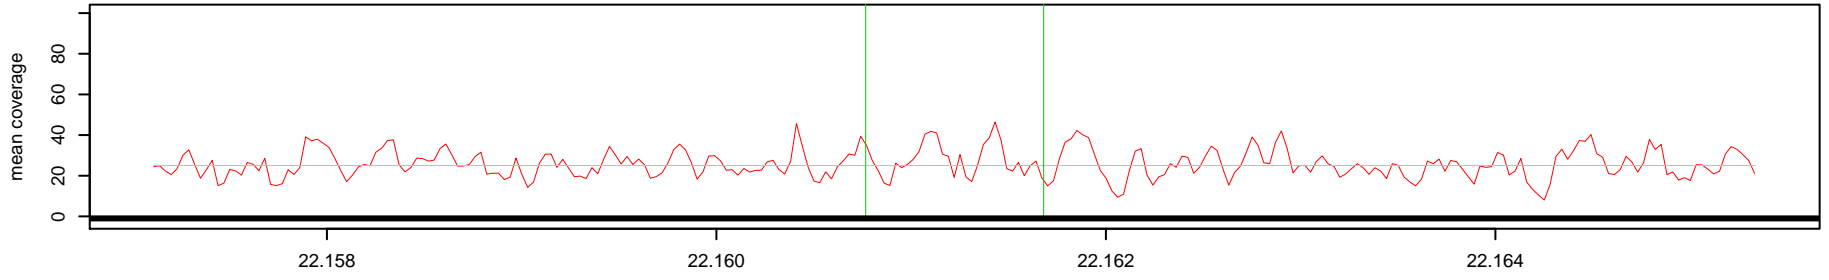

Log2( AK1 read depth / NA10851 read depth)

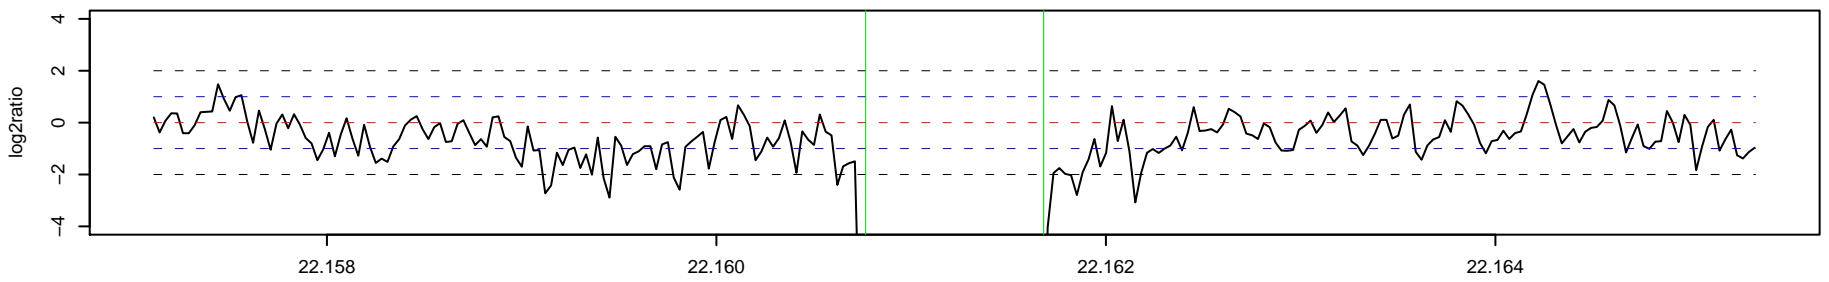

o

o

254 \_ AK1 Chr 6 : 26810816 – 26868759 , 57944 bp (aCGH relative log2ratio= -0.46 )

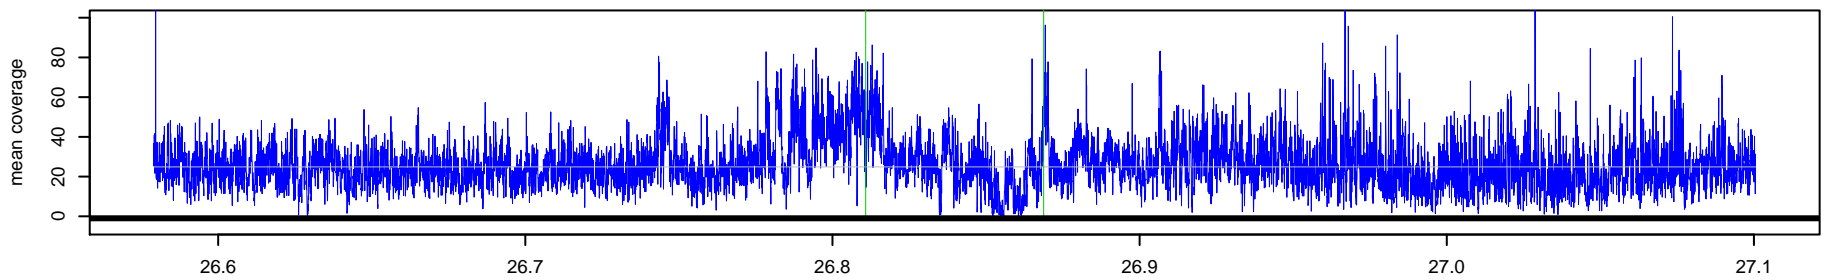

254 \_ NA10851 Chr 6 : 26810816 – 26868759 , 57944 bp (aCGH relative log2ratio= -0.46 )

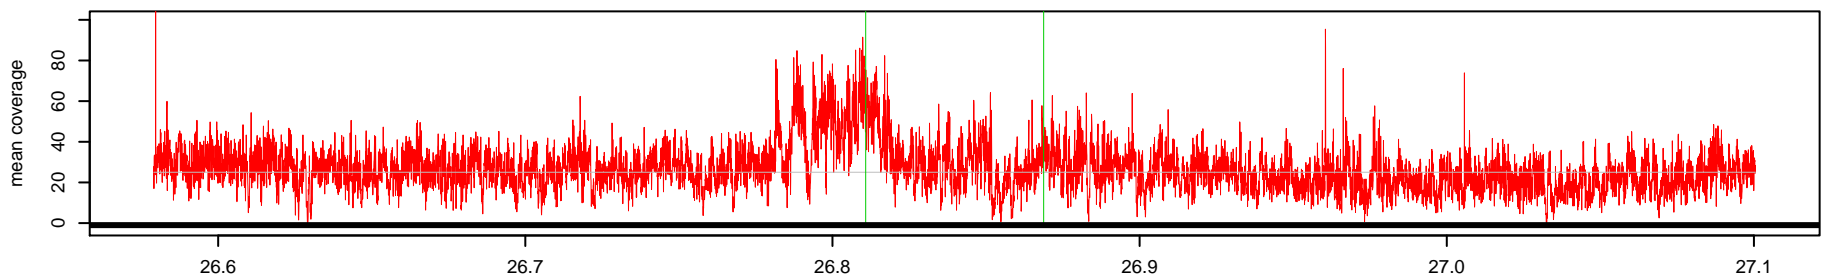

Log2( AK1 read depth / NA10851 read depth)

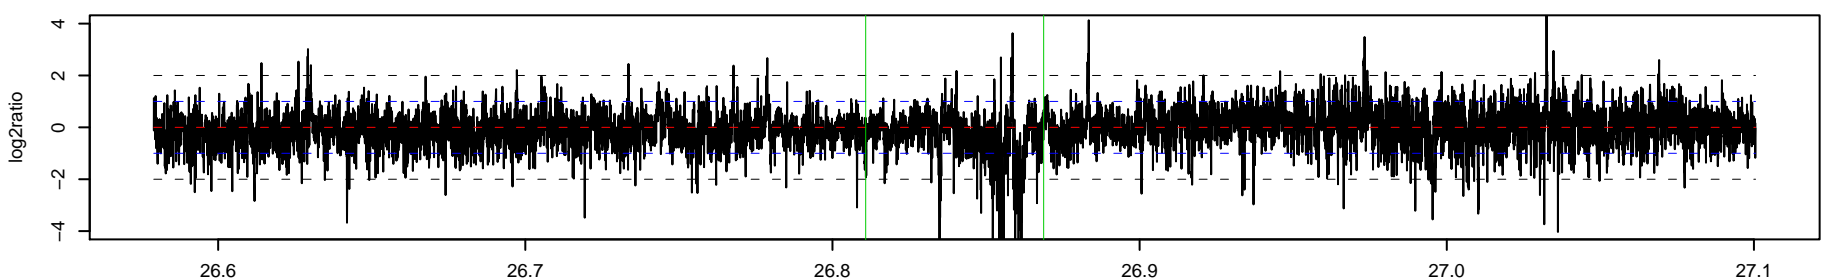

255 \_ AK1 Chr 6 : 31384717 – 31386601 , 1885 bp (aCGH relative log2ratio= -1.05 )

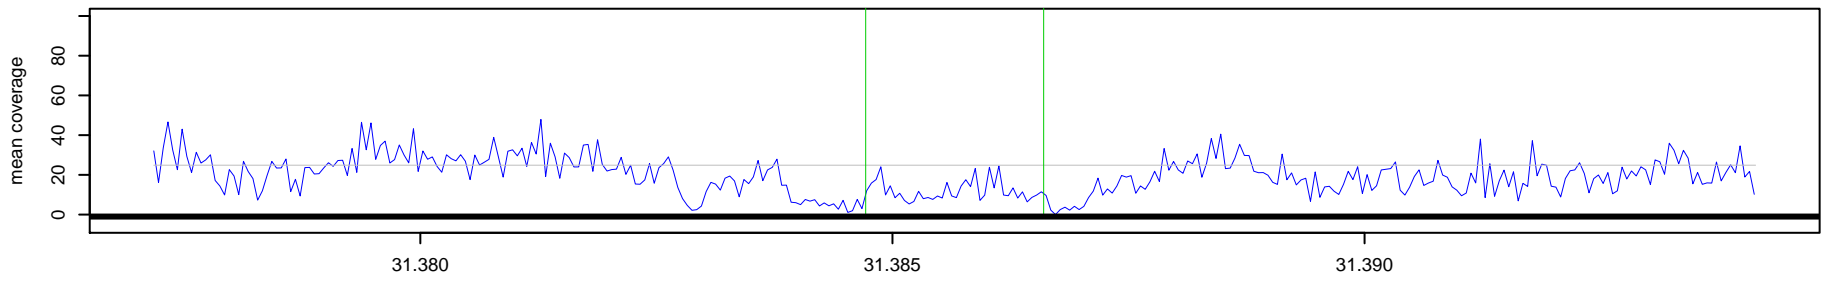

255 \_ NA10851 Chr 6 : 31384717 – 31386601 , 1885 bp (aCGH relative log2ratio= -1.05 )

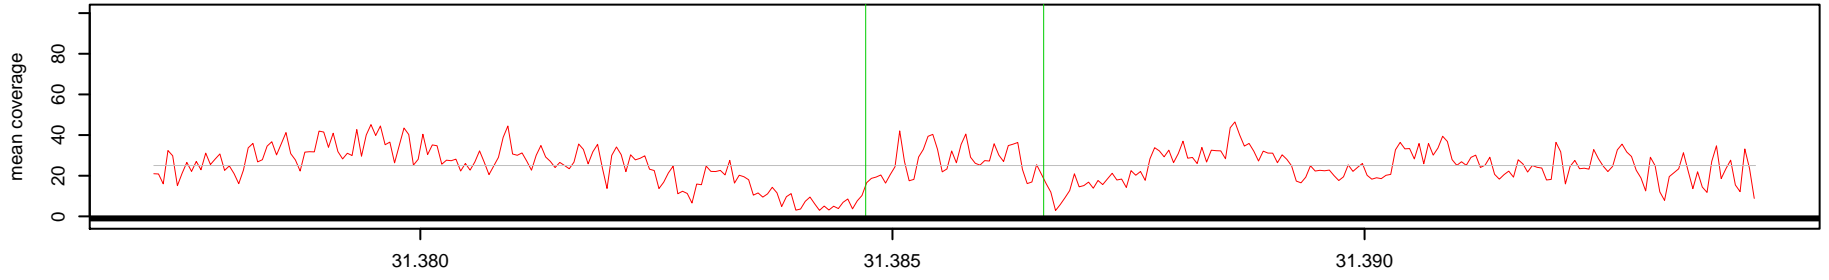

Log2( AK1 read depth / NA10851 read depth)

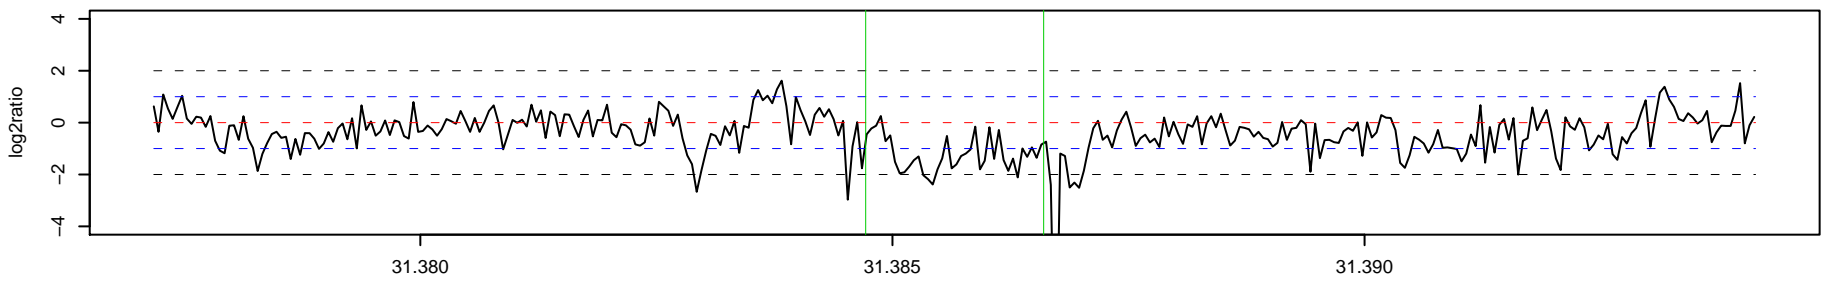

o

o

256 \_ AK1 Chr 6 : 31432701 – 31434141 , 1441 bp (aCGH relative log2ratio= -0.68 )

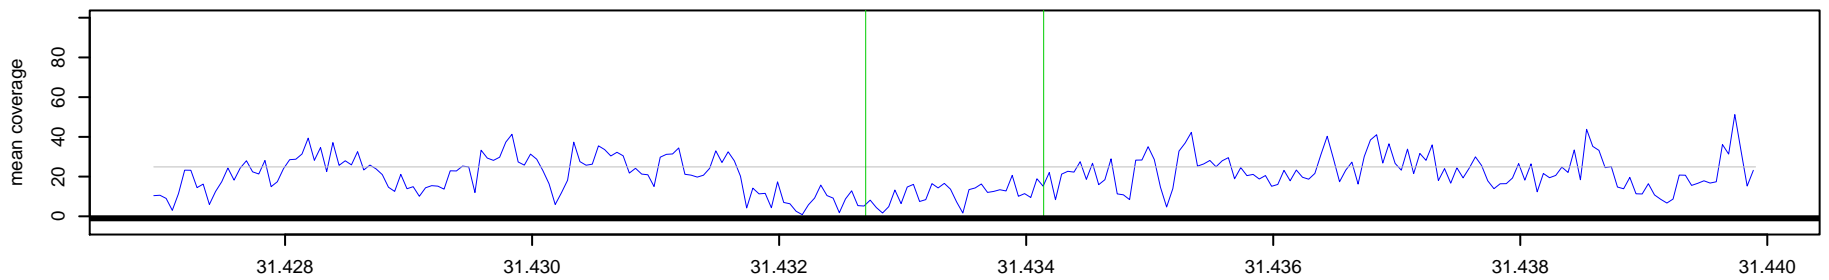

256 \_ NA10851 Chr 6 : 31432701 – 31434141 , 1441 bp (aCGH relative log2ratio= -0.68 )

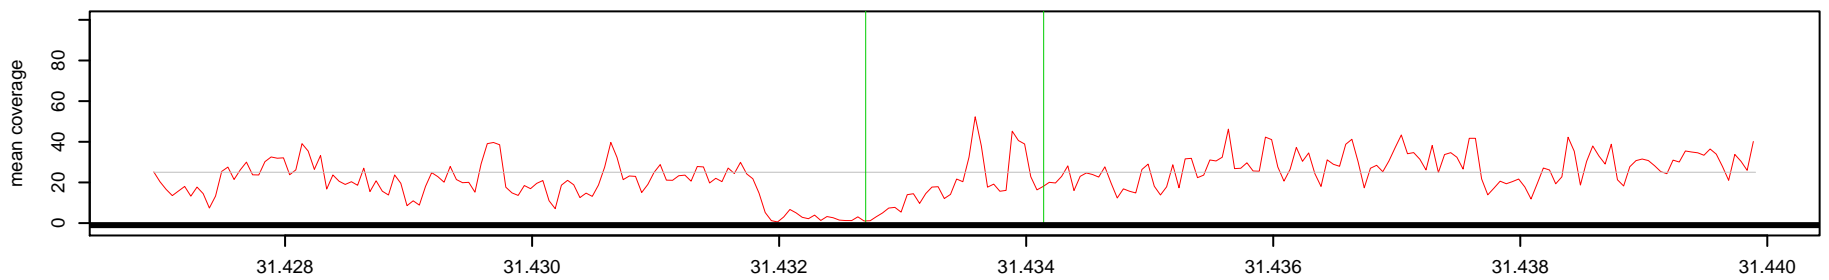

Log2( AK1 read depth / NA10851 read depth)

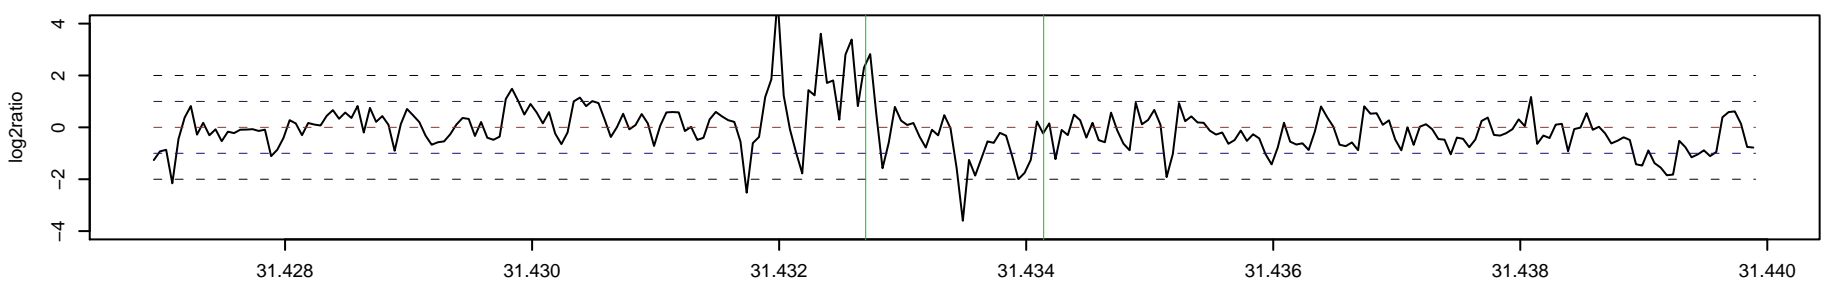

257 \_ AK1 Chr 6 : 32071824 – 32119538 , 47715 bp (aCGH relative log2ratio= -0.50 )

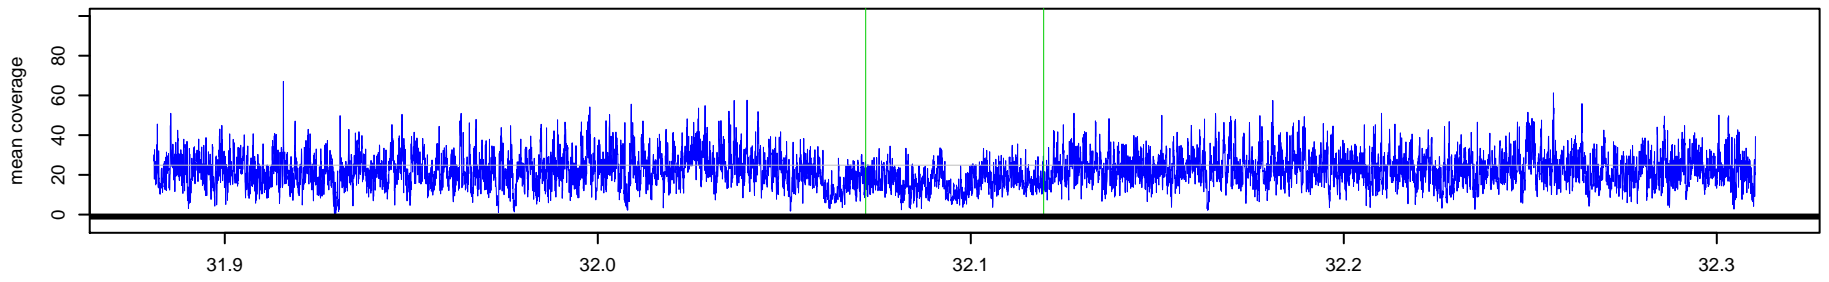

257 \_ NA10851 Chr 6 : 32071824 – 32119538 , 47715 bp (aCGH relative log2ratio= -0.50 )

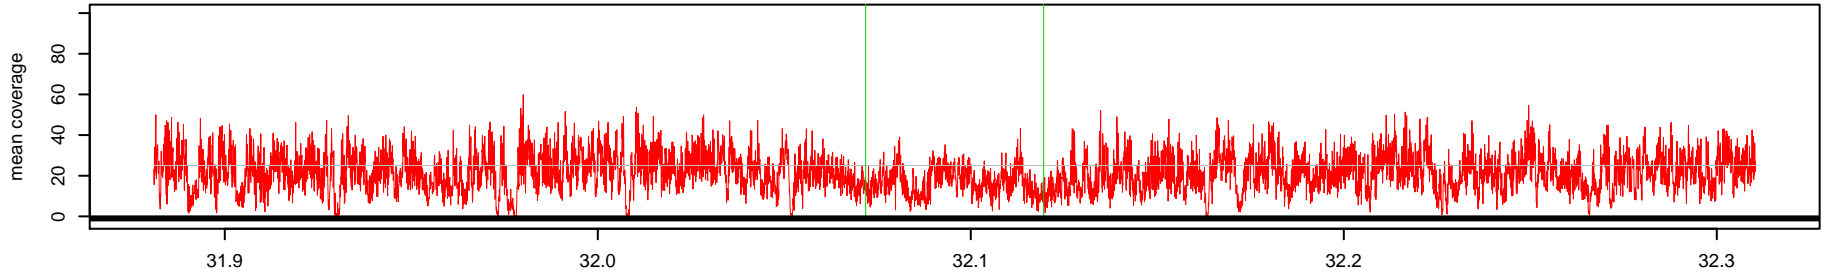

Log2( AK1 read depth / NA10851 read depth)

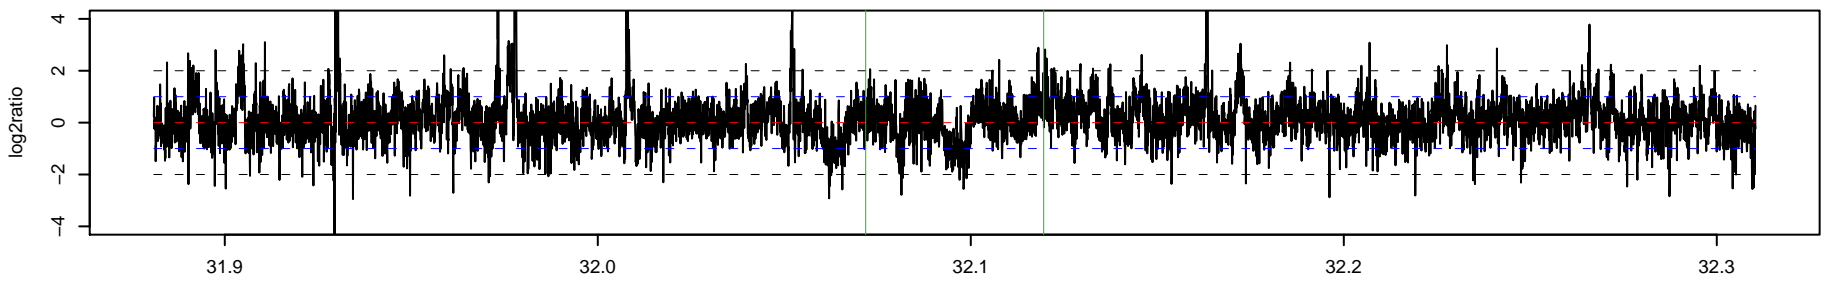

258 \_ AK1 Chr 6 : 35862999 – 35870762 , 7764 bp (aCGH relative log2ratio= 0.26 )

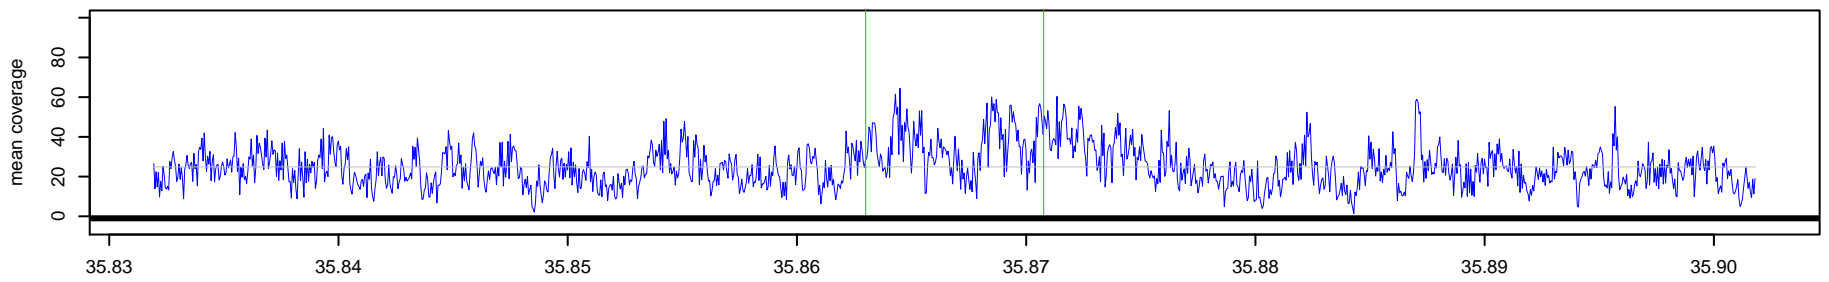

258 \_ NA10851 Chr 6 : 35862999 – 35870762 , 7764 bp (aCGH relative log2ratio= 0.26 )

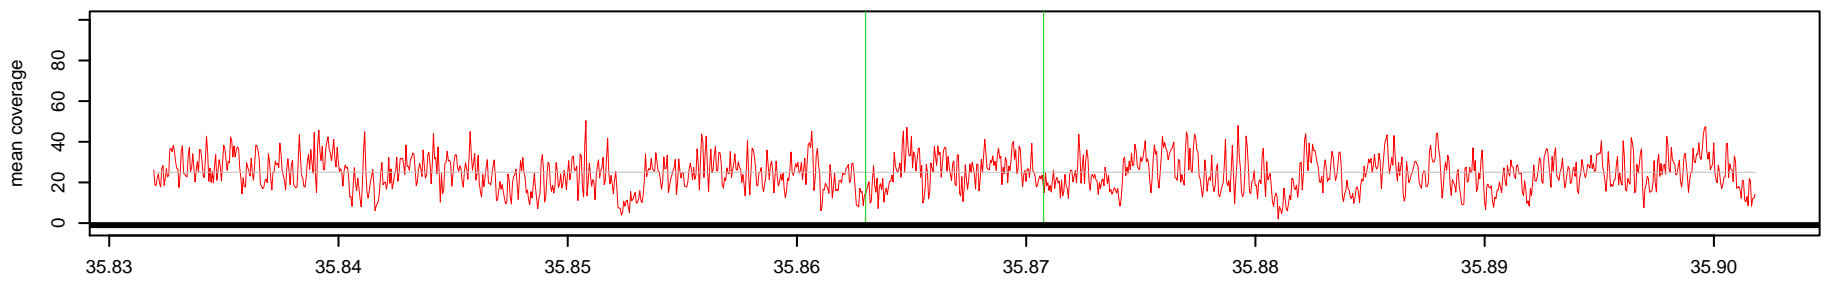

Log2( AK1 read depth / NA10851 read depth)

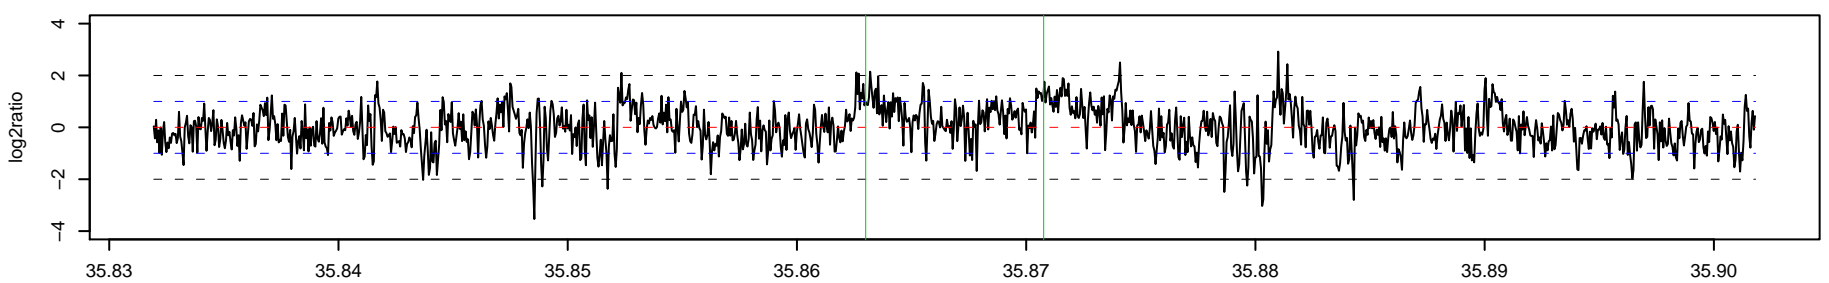

259\_AK1 Chr 6 : 36808611 – 36812835 , 4225 bp (aCGH relative log2ratio= -0.74 )

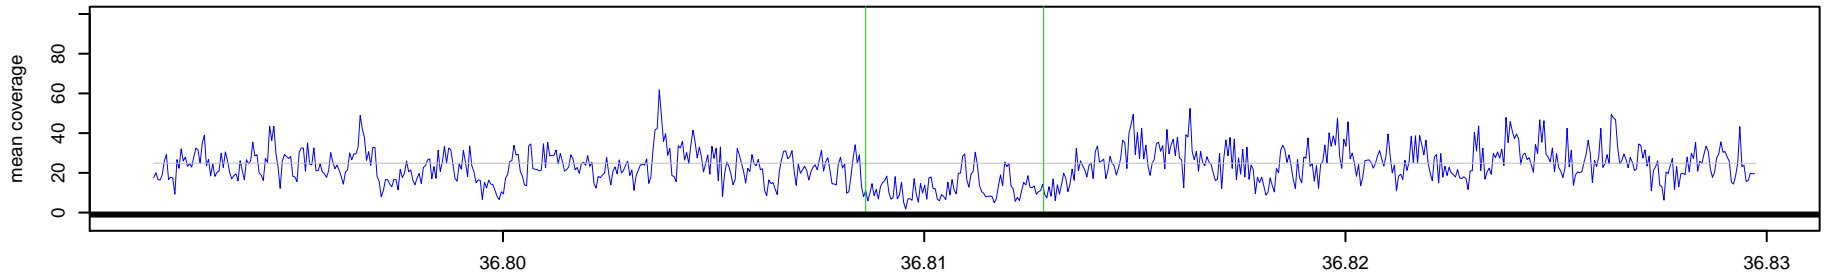

259\_NA10851 Chr 6 : 36808611 – 36812835 , 4225 bp (aCGH relative log2ratio= -0.74 )

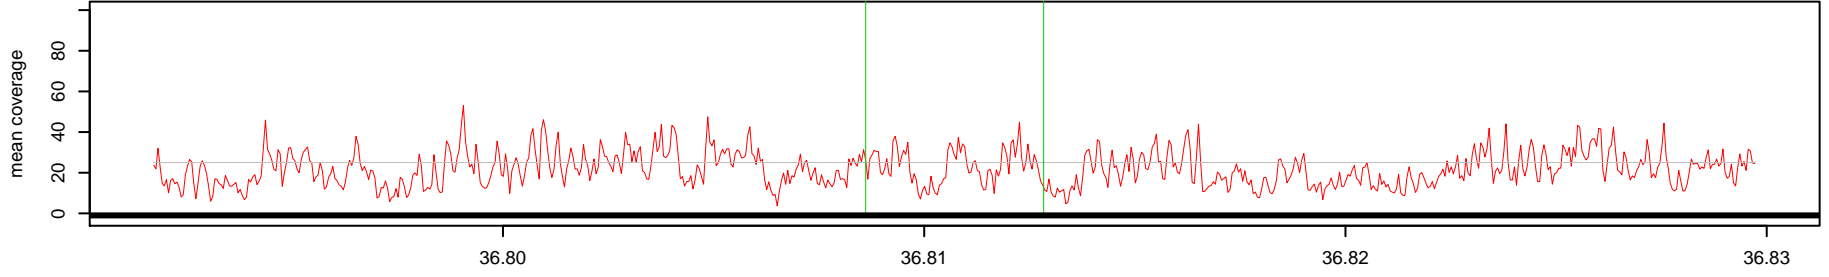

Log2( AK1 read depth / NA10851 read depth)

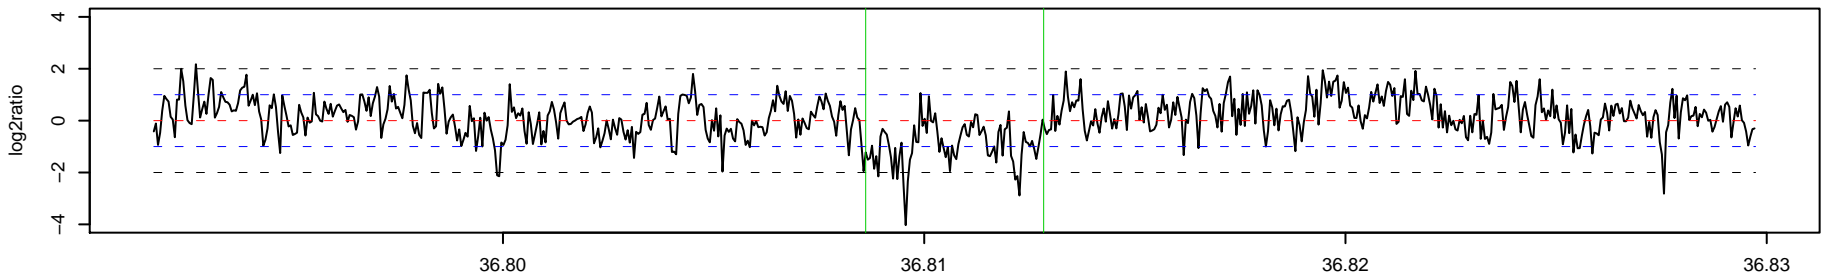

260\_AK1 Chr 6 : 51307388 – 51308060 , 673 bp (aCGH relative log2ratio= -0.87 )

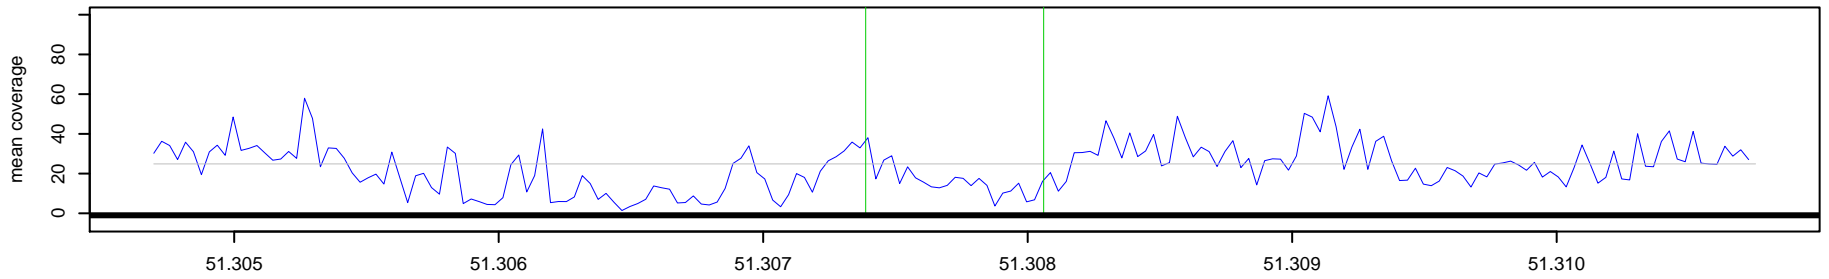

260\_NA10851 Chr 6 : 51307388 – 51308060 , 673 bp (aCGH relative log2ratio= -0.87 )

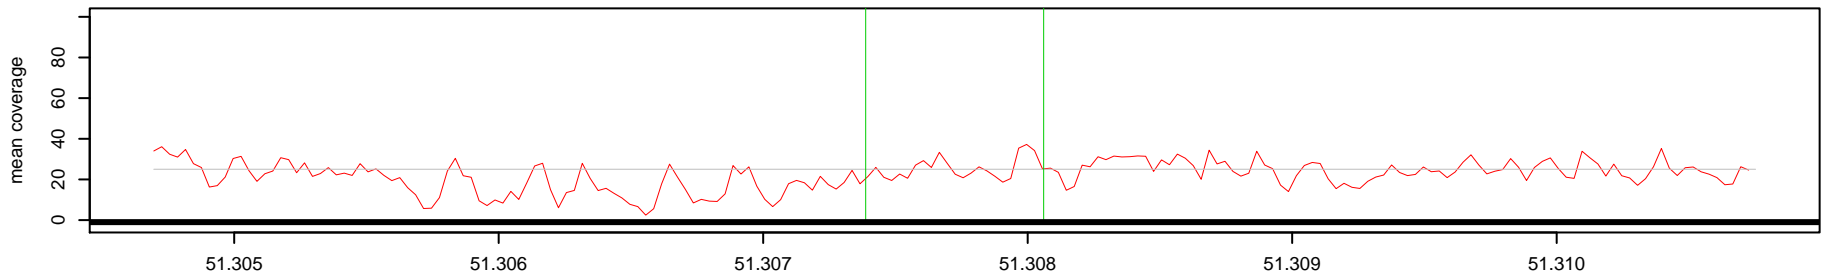

Log2( AK1 read depth / NA10851 read depth)

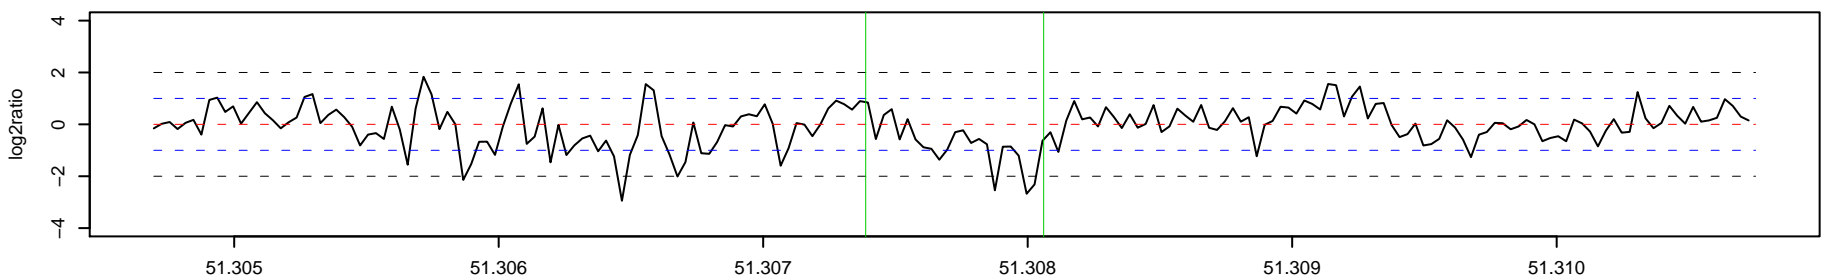

261 \_ AK1 Chr 6 : 54036604 – 54042759 , 6156 bp (aCGH relative log2ratio= 2.84 )

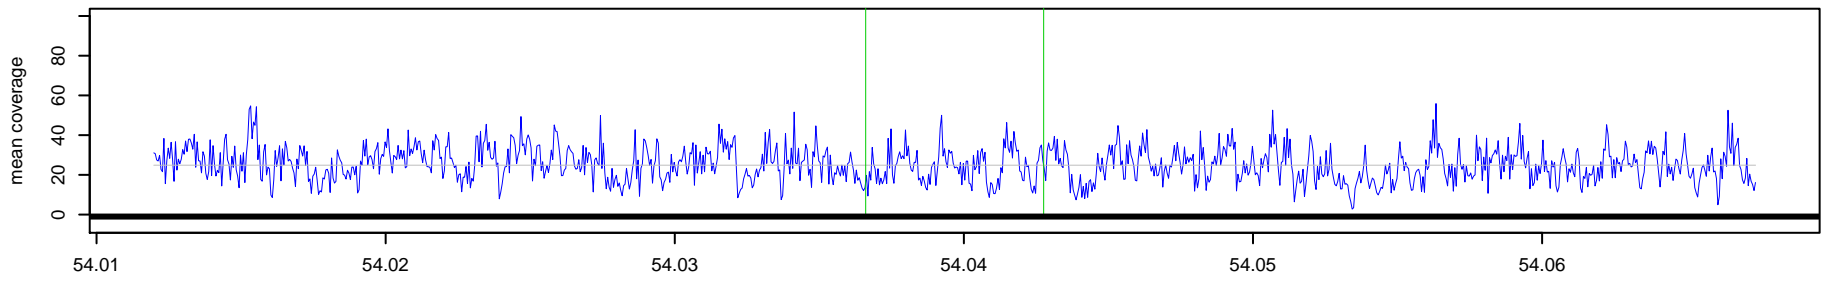

261 \_ NA10851 Chr 6 : 54036604 – 54042759 , 6156 bp (aCGH relative log2ratio= 2.84 )

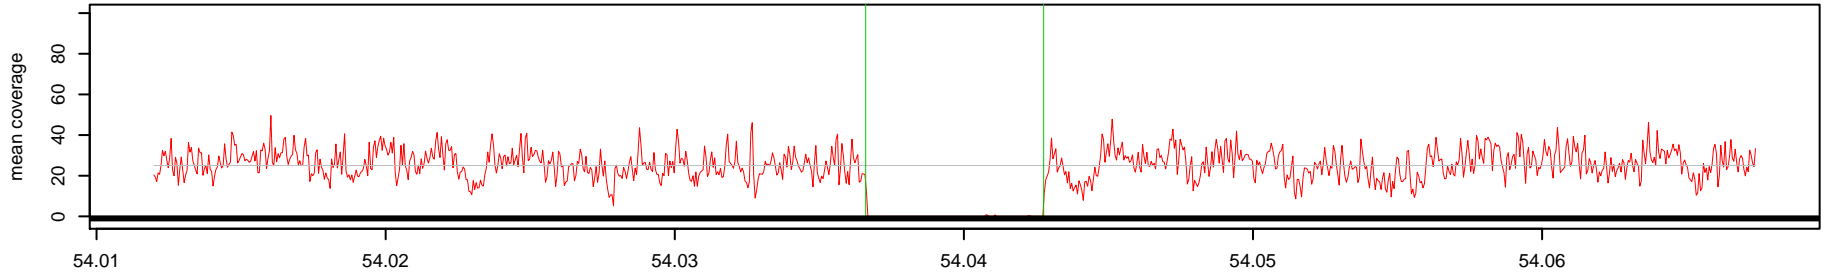

Log2( AK1 read depth / NA10851 read depth)

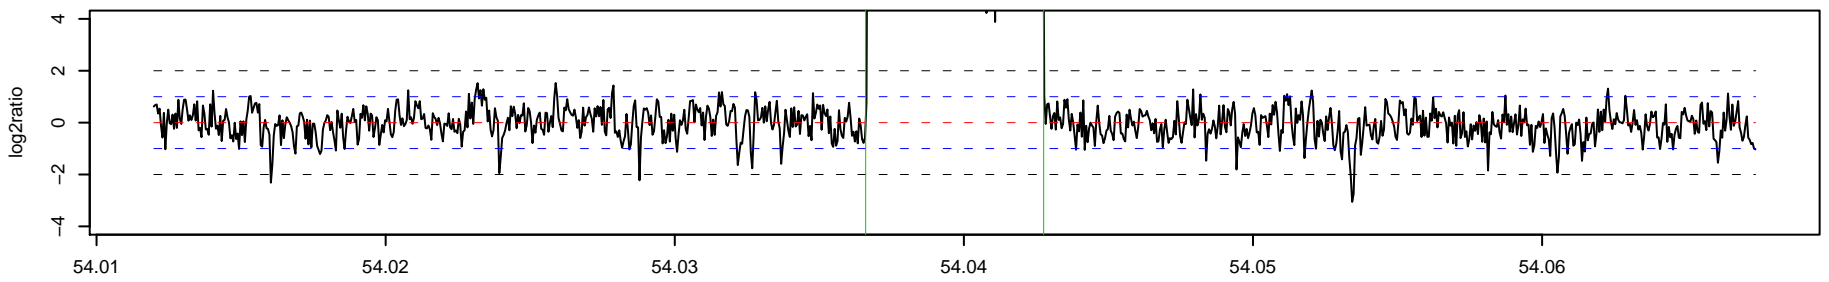

262 \_ AK1 Chr 6 : 57499010 – 57618216 , 119207 bp (aCGH relative log2ratio= 0.25 )

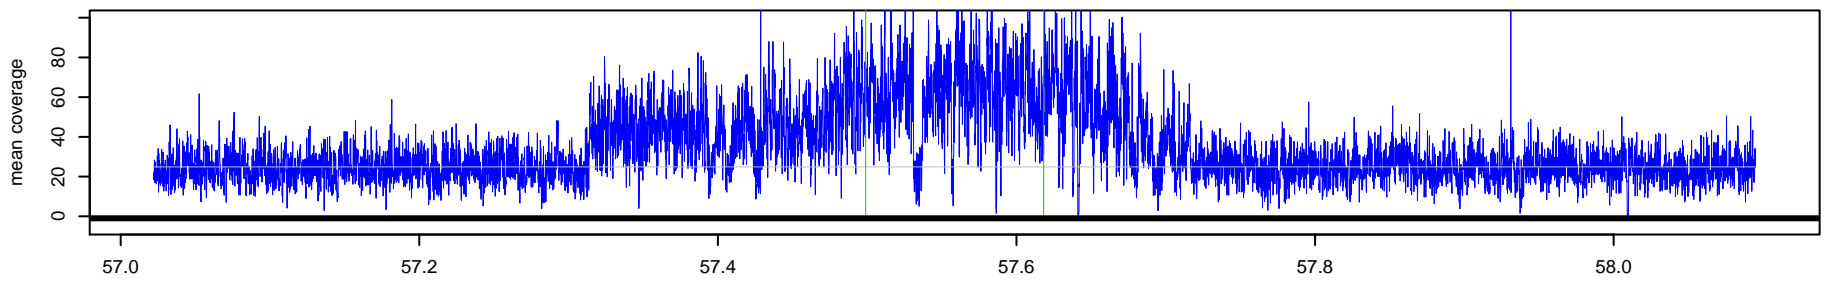

262 \_ NA10851 Chr 6 : 57499010 – 57618216 , 119207 bp (aCGH relative log2ratio= 0.25 )

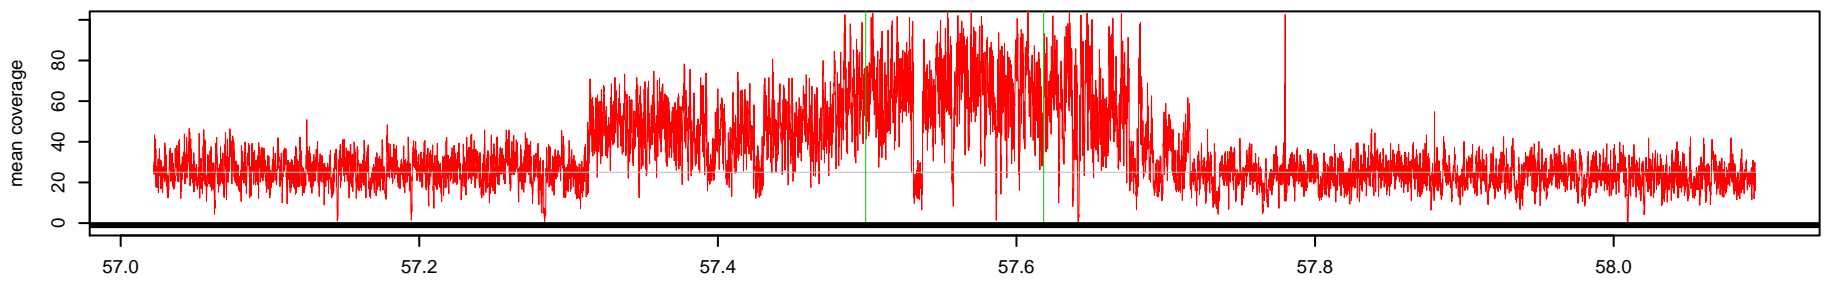

Log2( AK1 read depth / NA10851 read depth)

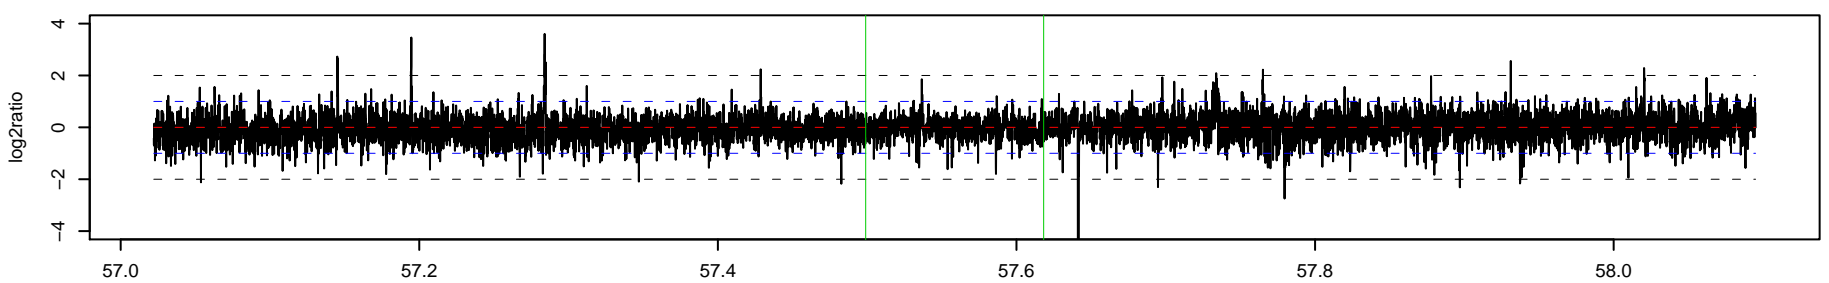

263\_AK1 Chr 6 : 63655527 – 63656816 , 1290 bp (aCGH relative log2ratio= -1.06 )

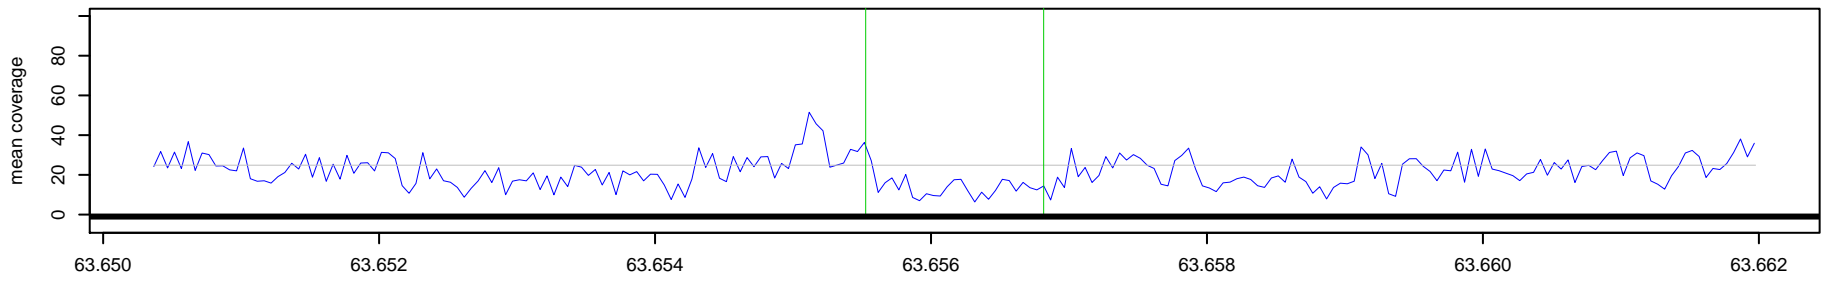

263\_NA10851 Chr 6 : 63655527 – 63656816 , 1290 bp (aCGH relative log2ratio= -1.06 )

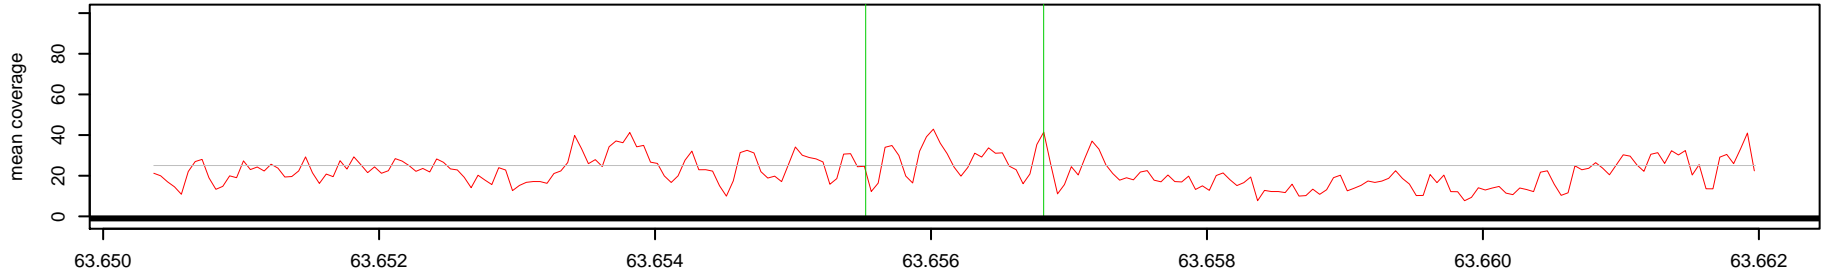

Log2( AK1 read depth / NA10851 read depth)

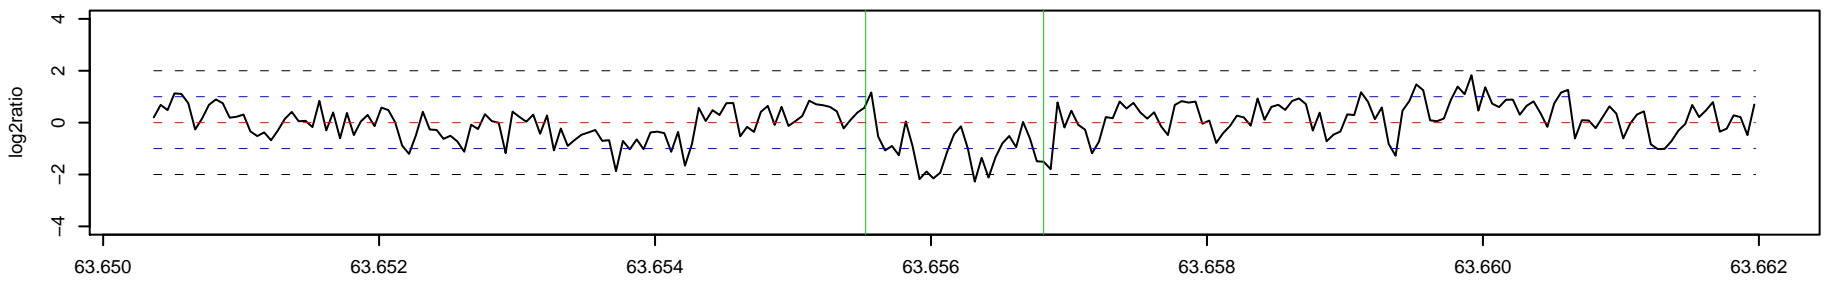

264\_AK1 Chr 6 : 64725238 – 64726079 , 842 bp (aCGH relative log2ratio= -0.95 )

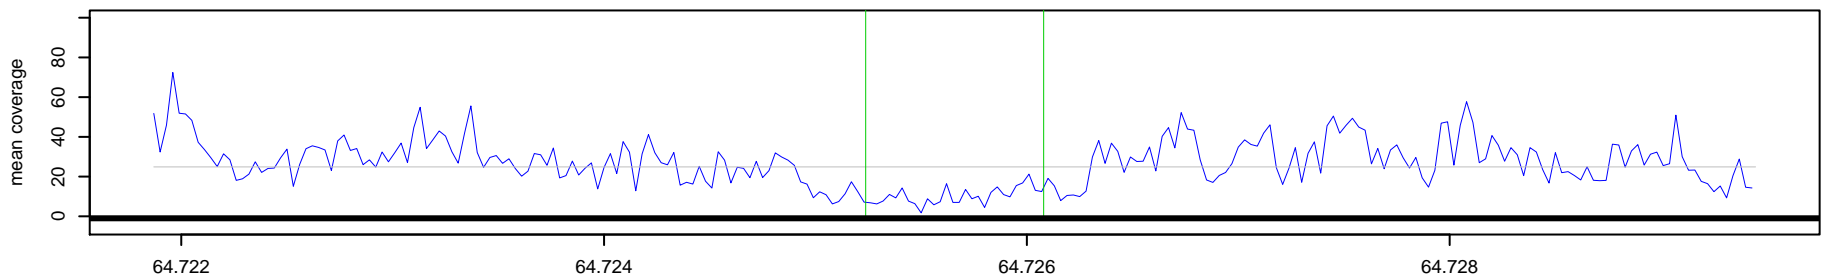

264\_NA10851 Chr 6 : 64725238 – 64726079 , 842 bp (aCGH relative log2ratio= -0.95 )

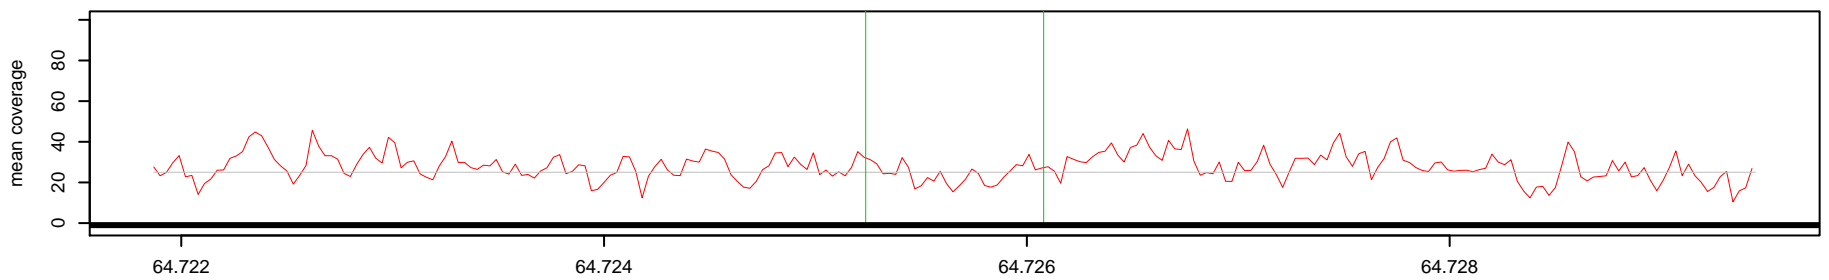

Log2( AK1 read depth / NA10851 read depth)

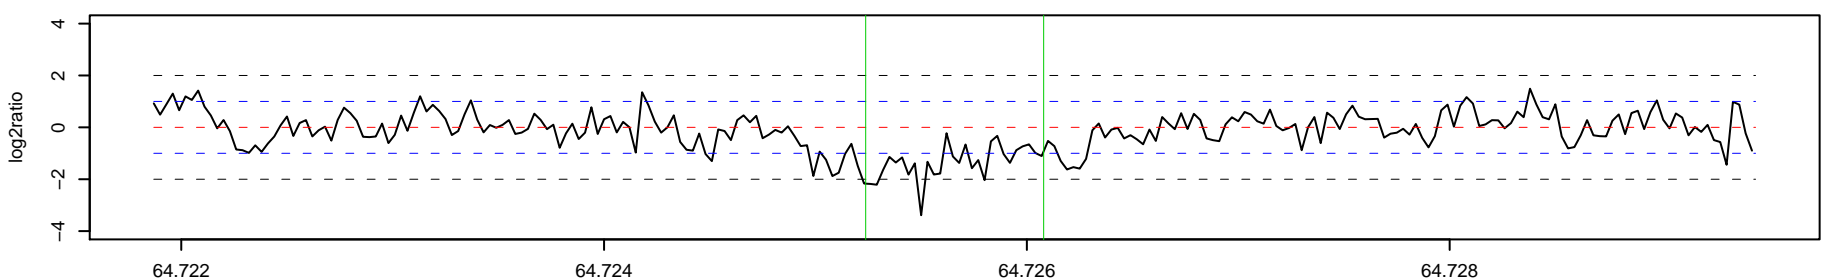



265\_AK1 Chr 6 : 65404018 – 65406217 , 2200 bp (aCGH relative log2ratio= -3.28 )

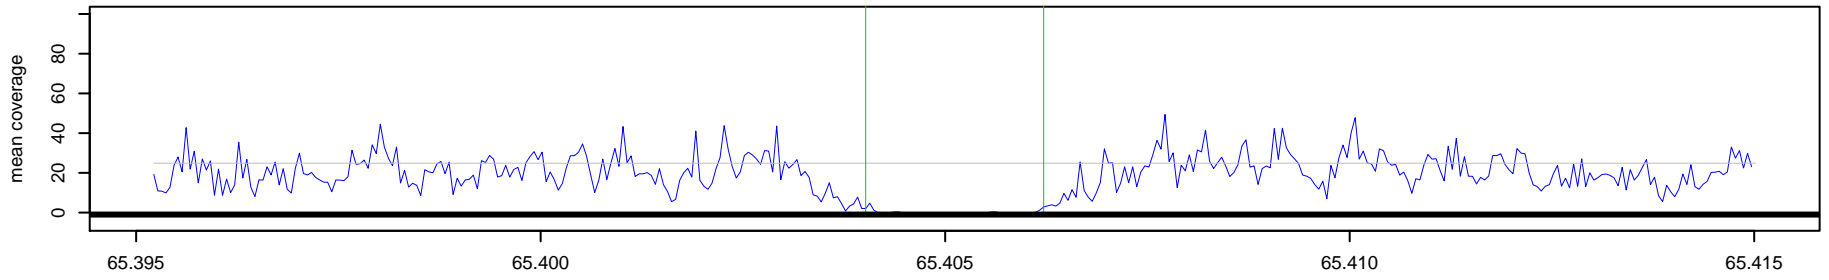

265\_NA10851 Chr 6 : 65404018 – 65406217 , 2200 bp (aCGH relative log2ratio= -3.28 )

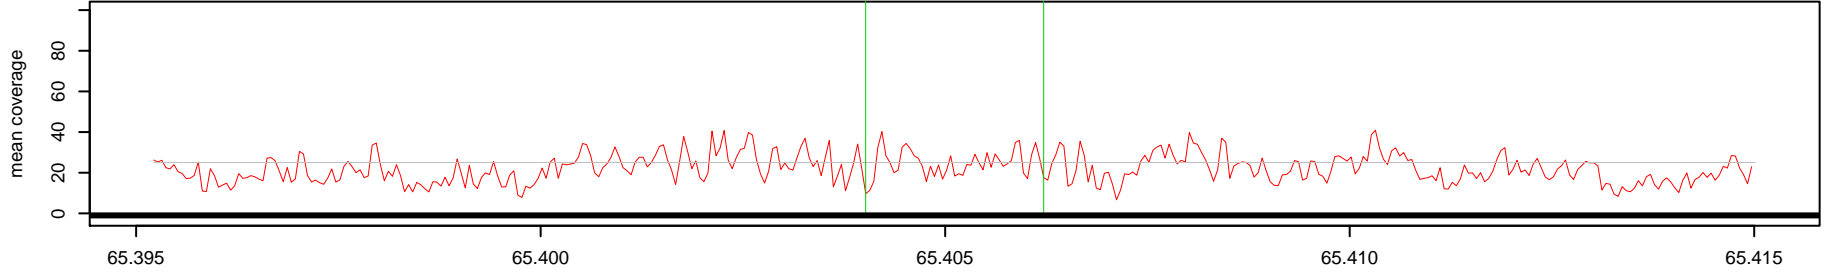

Log2( AK1 read depth / NA10851 read depth)

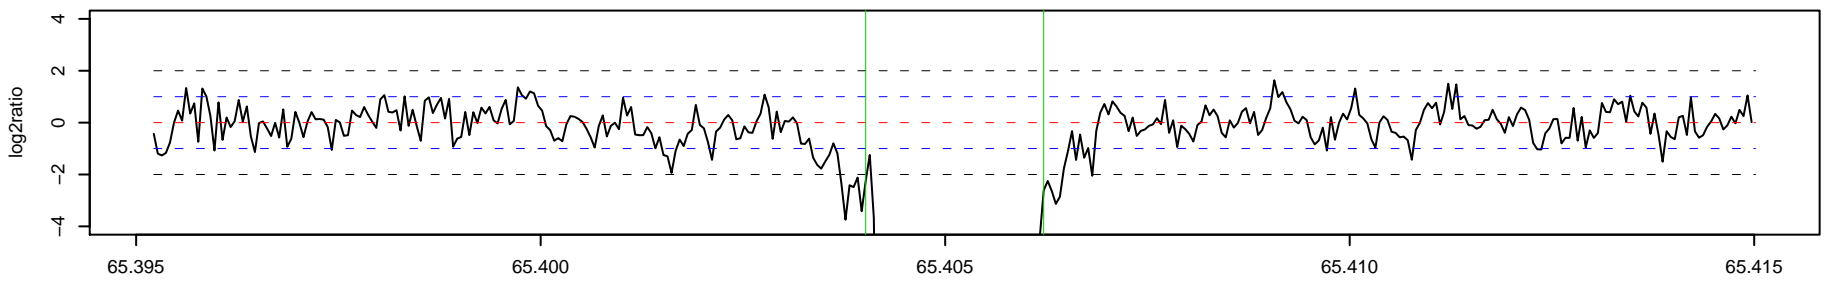

o

o

266\_AK1 Chr 6 : 65768157 – 65771732 , 3576 bp (aCGH relative log2ratio= -0.78 )

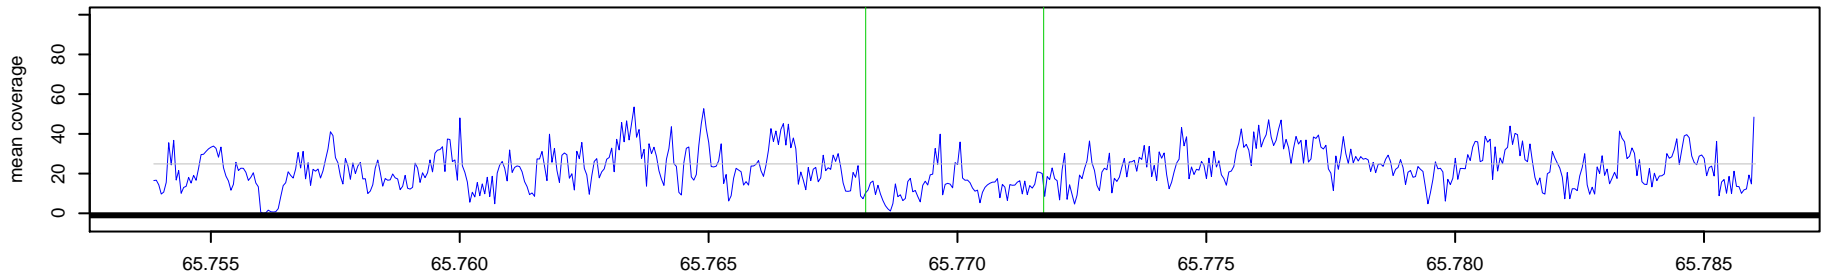

266\_NA10851 Chr 6 : 65768157 – 65771732 , 3576 bp (aCGH relative log2ratio= -0.78 )

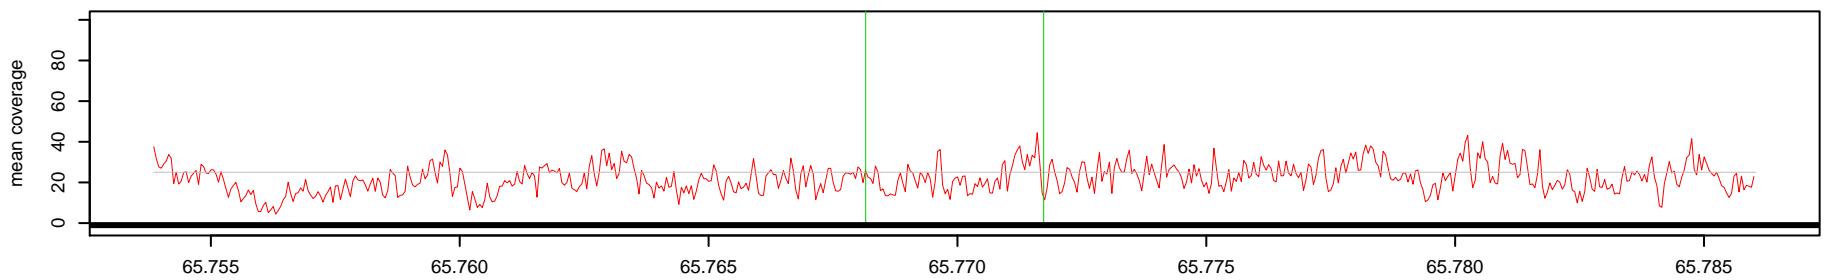

Log2( AK1 read depth / NA10851 read depth)

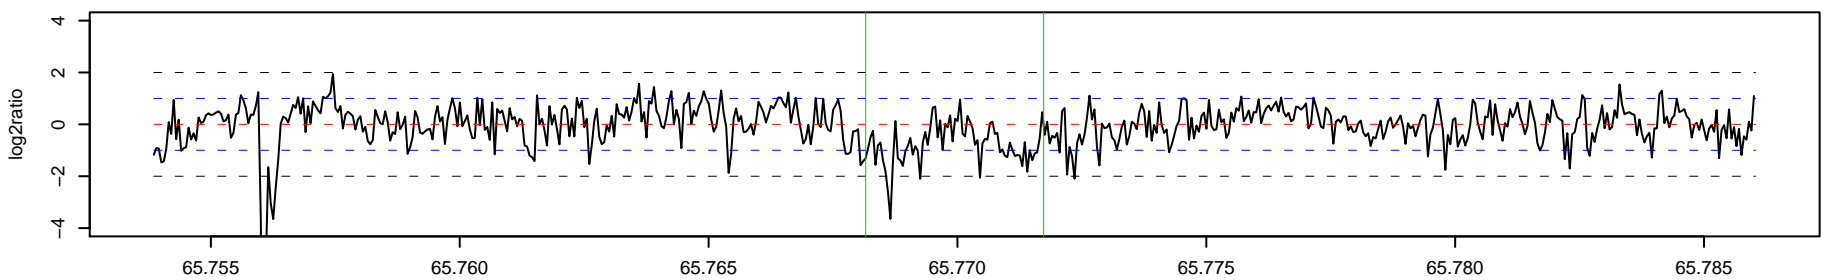

267\_AK1 Chr 6 : 65824898 – 65825490 , 593 bp (aCGH relative log2ratio= -0.88 )

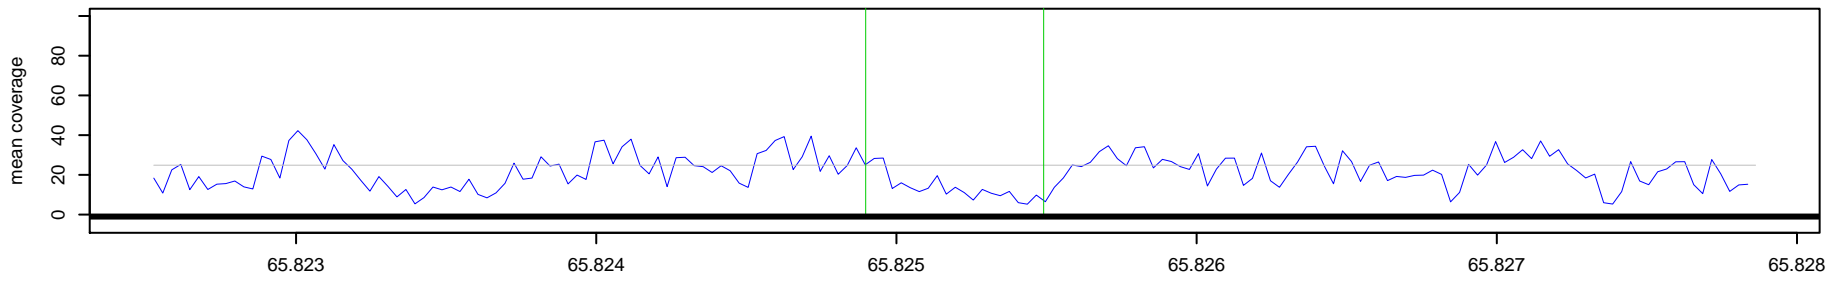

267\_NA10851 Chr 6 : 65824898 – 65825490 , 593 bp (aCGH relative log2ratio= -0.88 )

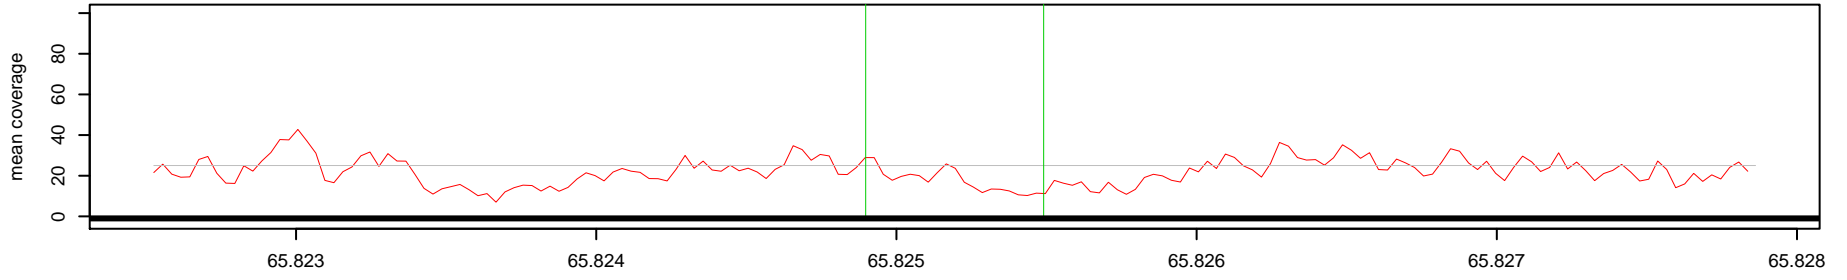

Log2( AK1 read depth / NA10851 read depth)

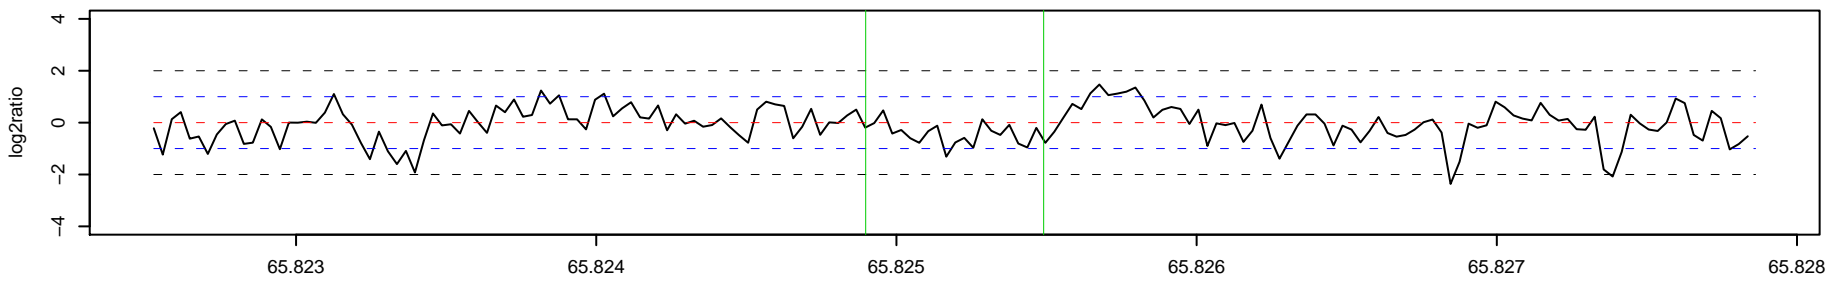

268\_AK1 Chr 6 : 70633658 – 70634632 , 975 bp (aCGH relative log2ratio= -0.61 )

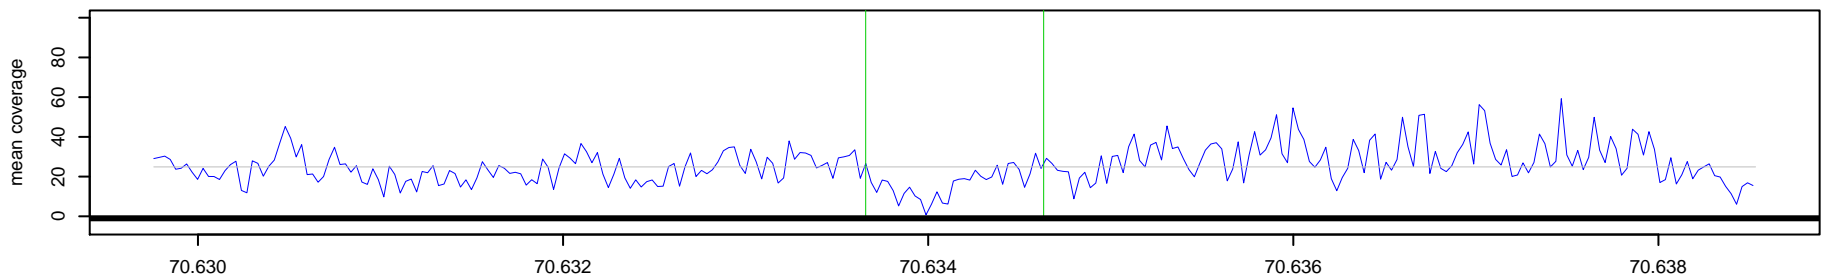

268\_NA10851 Chr 6 : 70633658 – 70634632 , 975 bp (aCGH relative log2ratio= -0.61 )

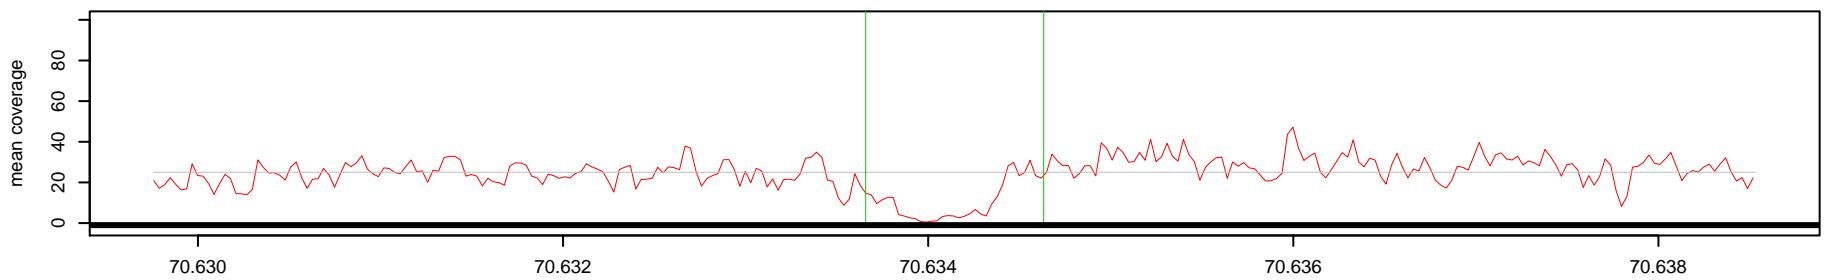

Log2( AK1 read depth / NA10851 read depth)

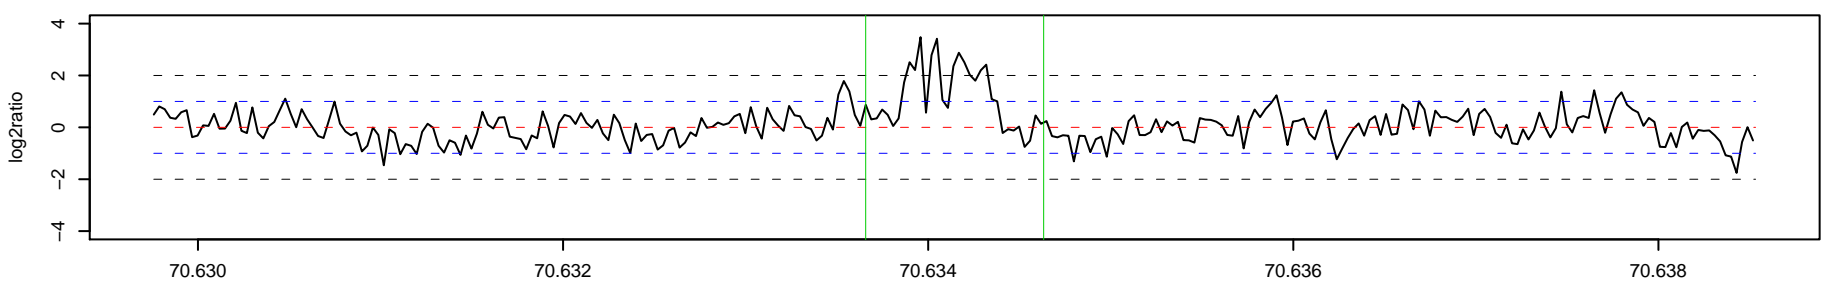

269\_AK1 Chr 6 : 72920519 – 72924549 , 4031 bp (aCGH relative log2ratio= 0.87 )

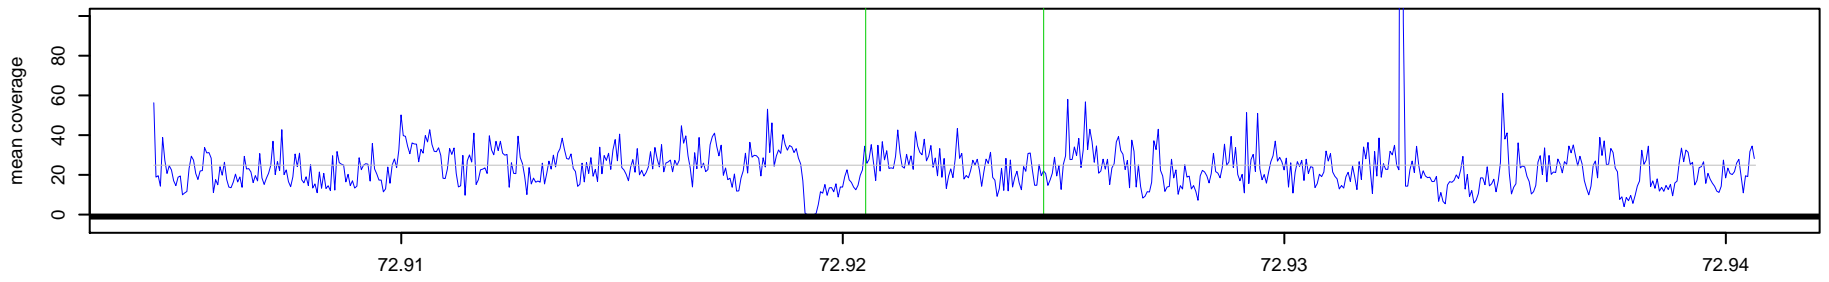

269\_NA10851 Chr 6 : 72920519 – 72924549 , 4031 bp (aCGH relative log2ratio= 0.87 )

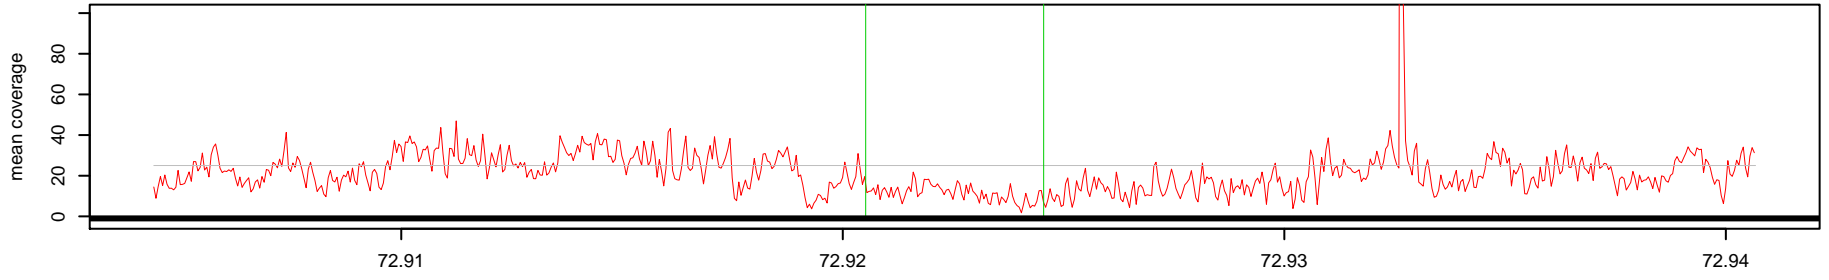

Log2( AK1 read depth / NA10851 read depth)

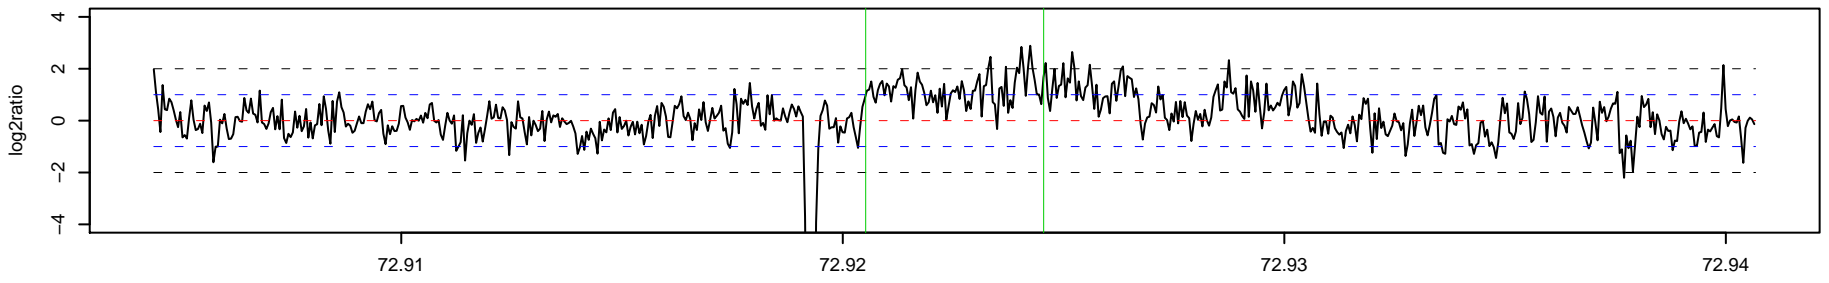

o

270\_AK1 Chr 6 : 74889184 – 74890277 , 1094 bp (aCGH relative log2ratio= 0.77 )

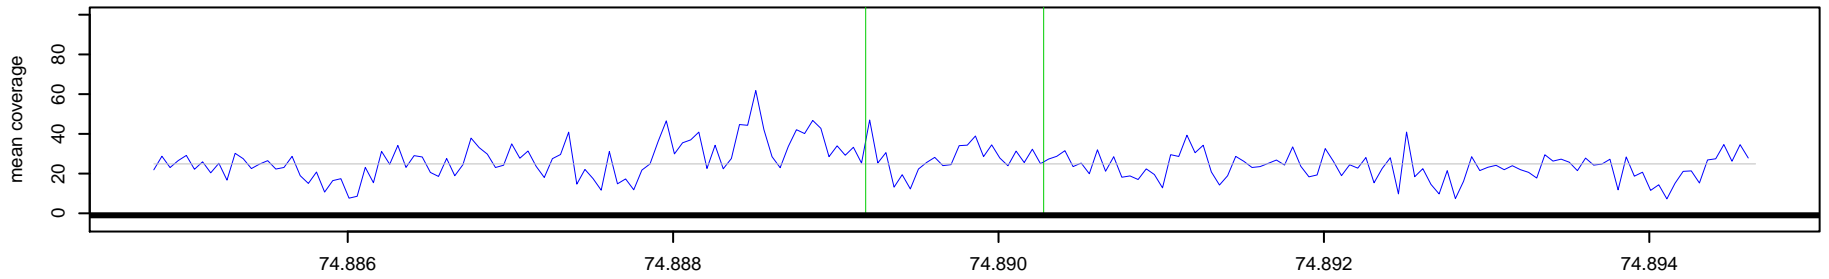

270\_NA10851 Chr 6 : 74889184 – 74890277 , 1094 bp (aCGH relative log2ratio= 0.77 )

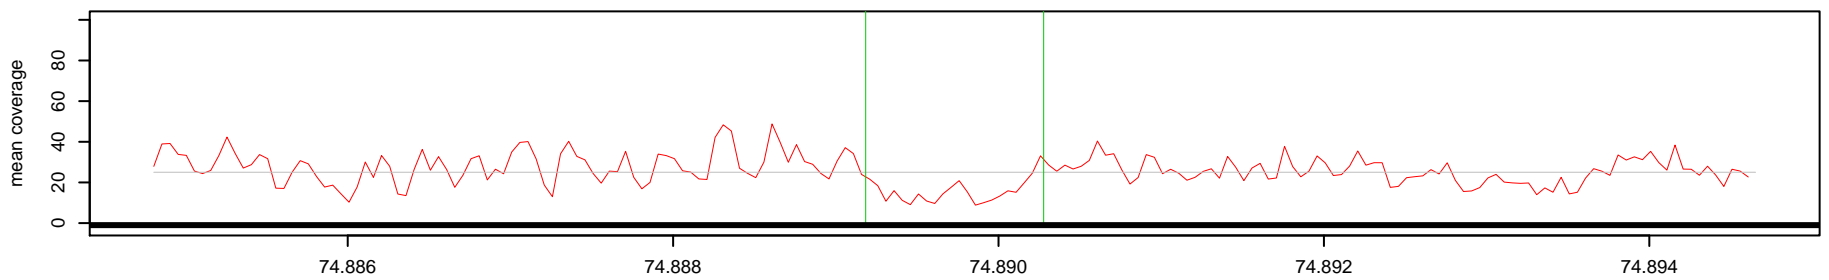

Log2( AK1 read depth / NA10851 read depth)

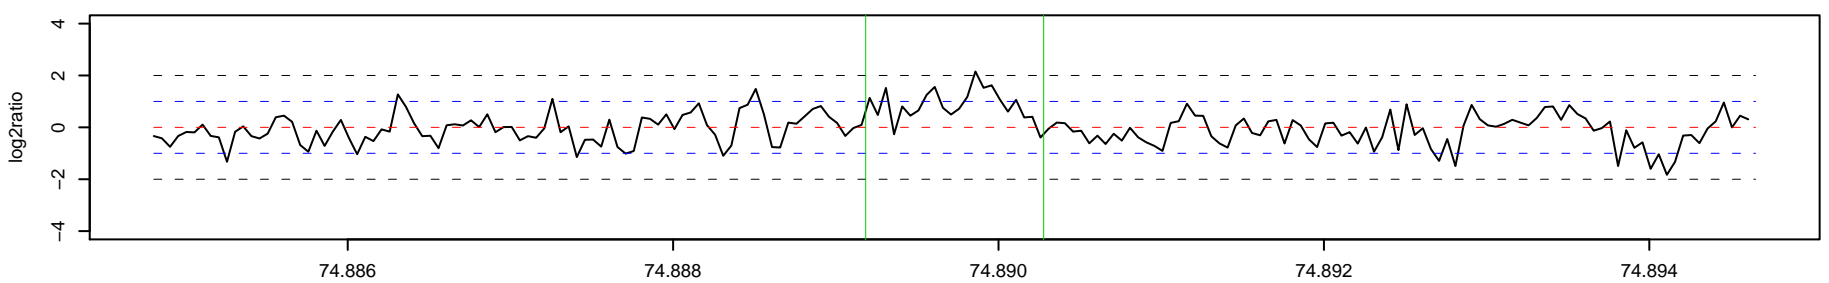

o

271 \_ AK1 Chr 6 : 77496736 – 77512163 , 15428 bp (aCGH relative log2ratio= 0.93 )

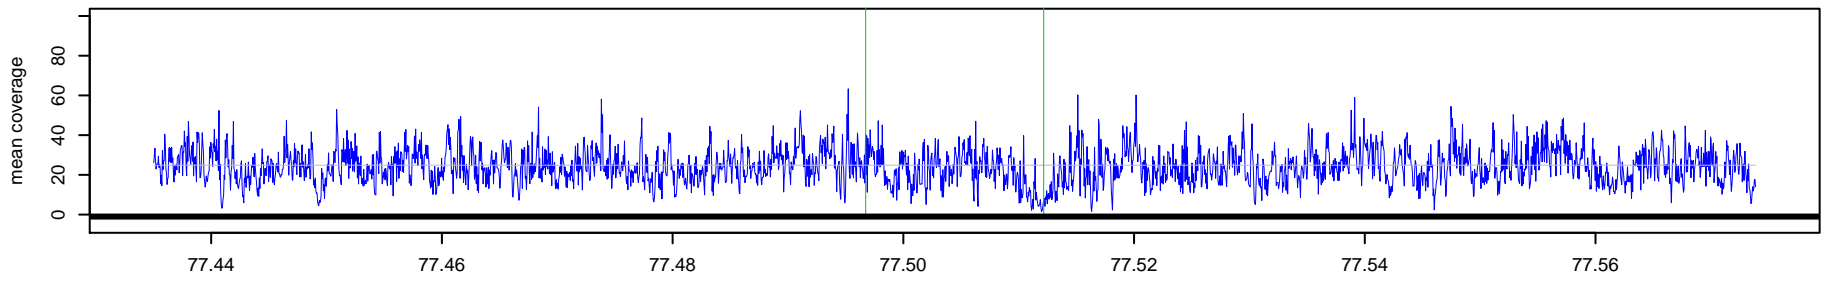

271 \_ NA10851 Chr 6 : 77496736 – 77512163 , 15428 bp (aCGH relative log2ratio= 0.93 )

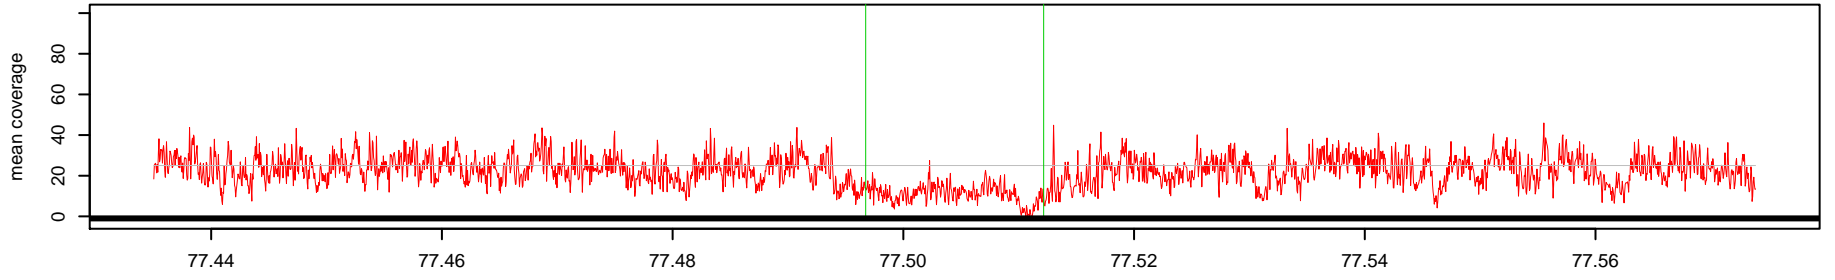

Log2( AK1 read depth / NA10851 read depth)

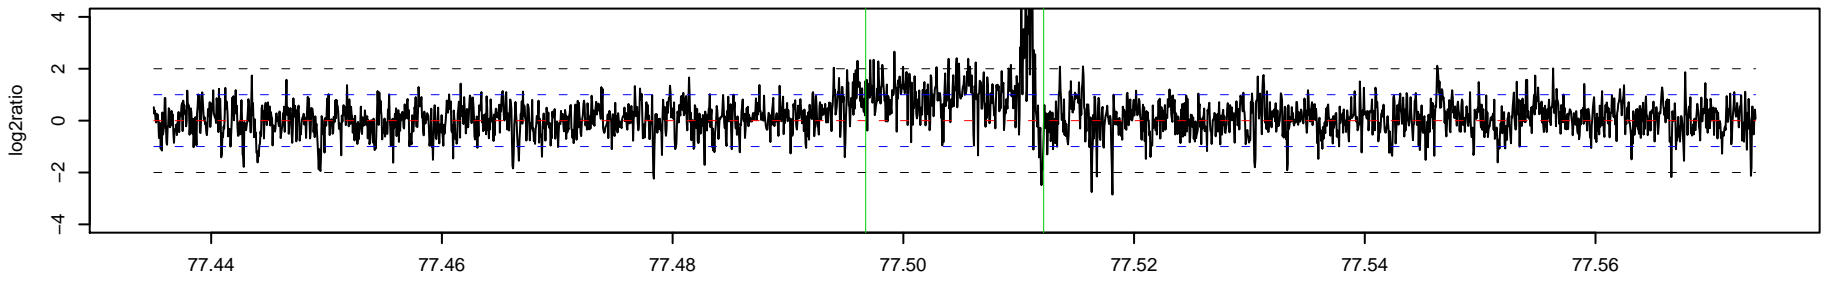

272 \_ AK1 Chr 6 : 79024357 – 79092081 , 67725 bp (aCGH relative log2ratio= -2.64 )

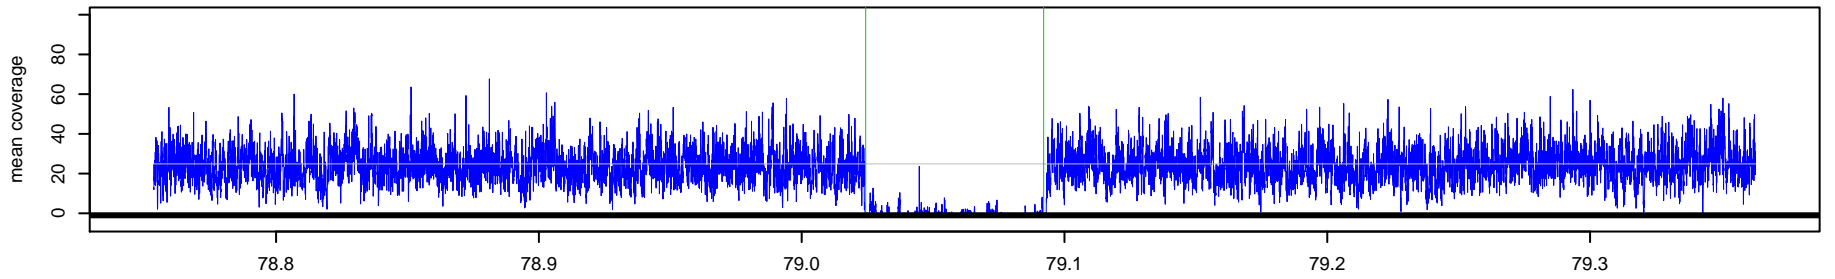

272 \_ NA10851 Chr 6 : 79024357 – 79092081 , 67725 bp (aCGH relative log2ratio= -2.64 )

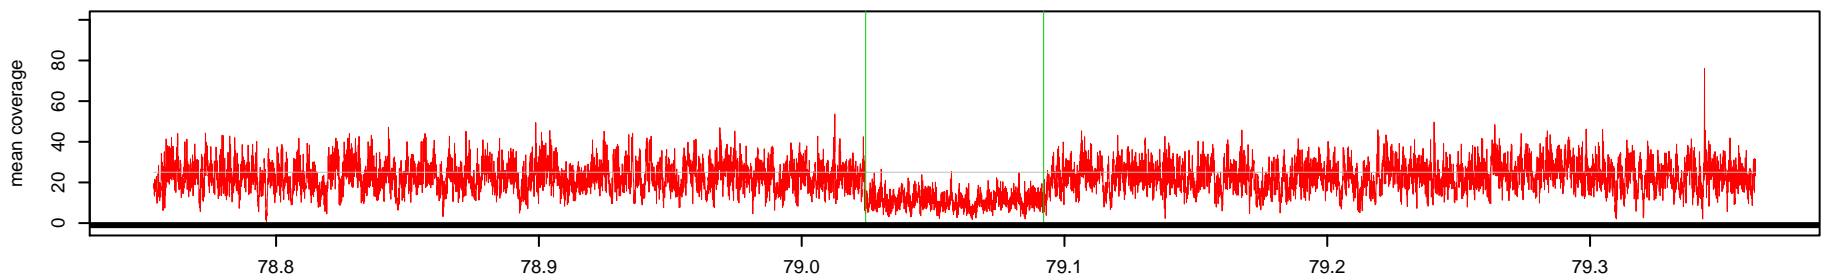

Log2( AK1 read depth / NA10851 read depth)

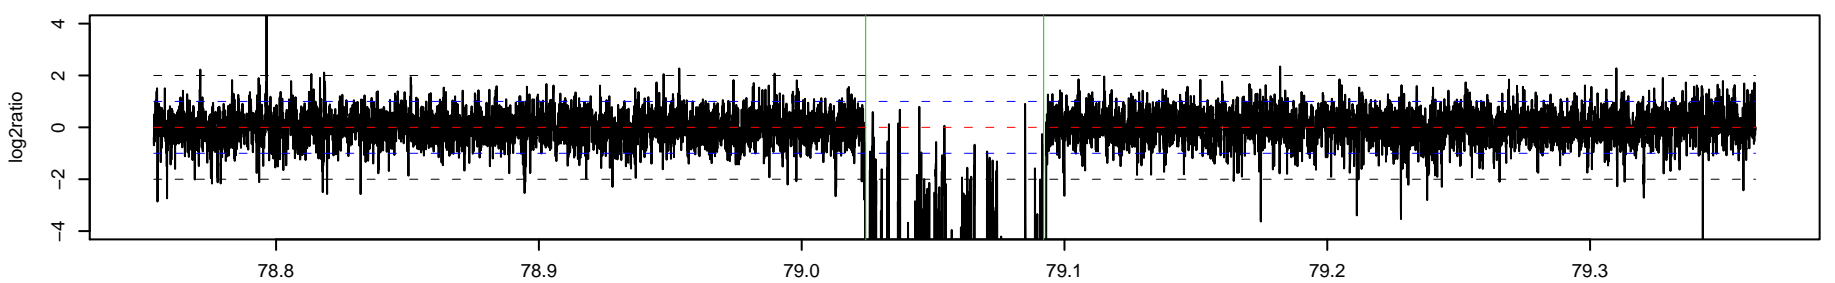

273\_AK1 Chr 6 : 79577694 - 79581479 , 3786 bp (aCGH relative log2ratio= 2.81 )

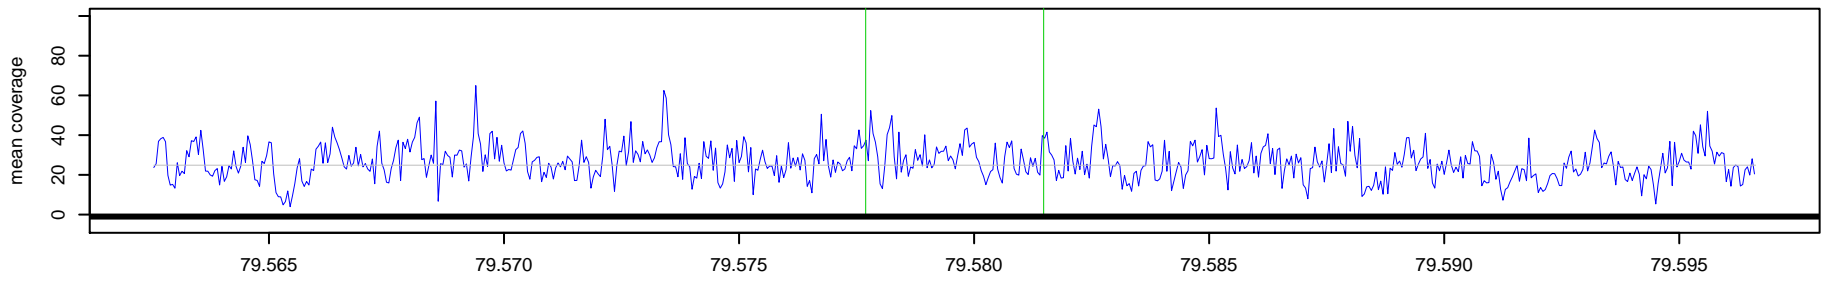

273\_NA10851 Chr 6 : 79577694 - 79581479 , 3786 bp (aCGH relative log2ratio= 2.81 )

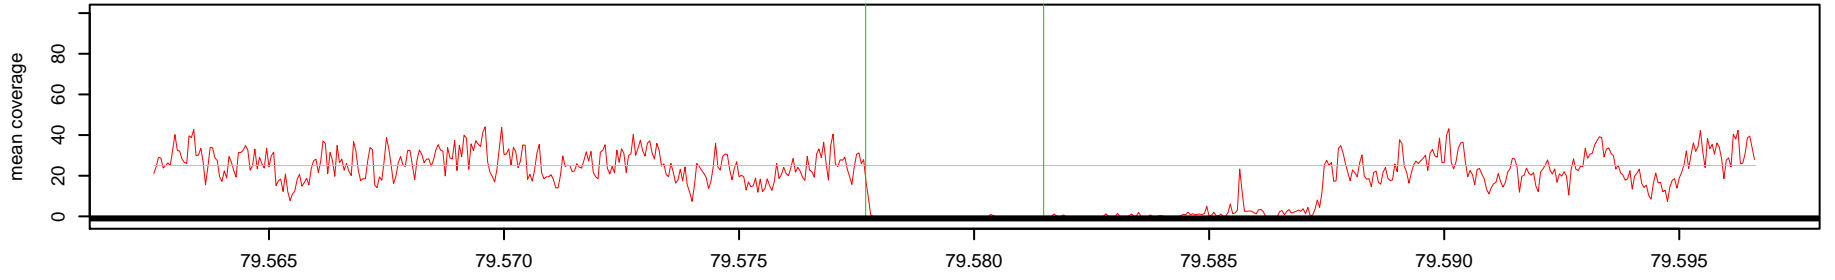

Log2( AK1 read depth / NA10851 read depth)

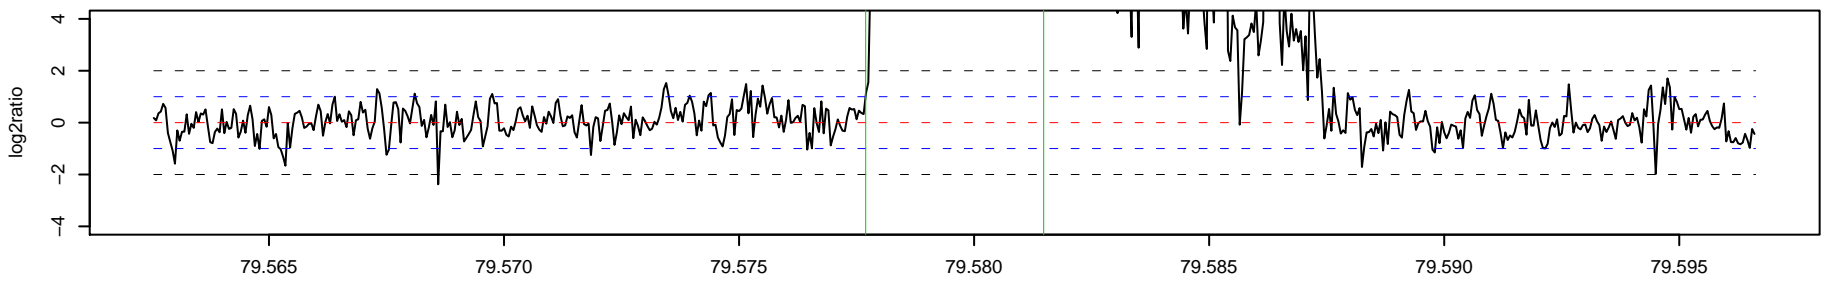

274\_AK1 Chr 6 : 91480675 - 91481671 , 997 bp (aCGH relative log2ratio= -0.88 )

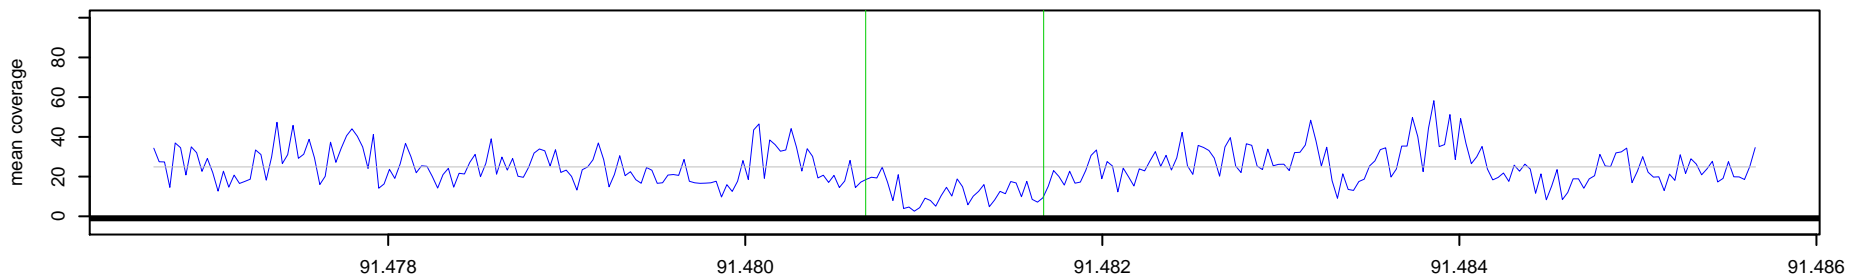

274\_NA10851 Chr 6 : 91480675 - 91481671 , 997 bp (aCGH relative log2ratio= -0.88 )

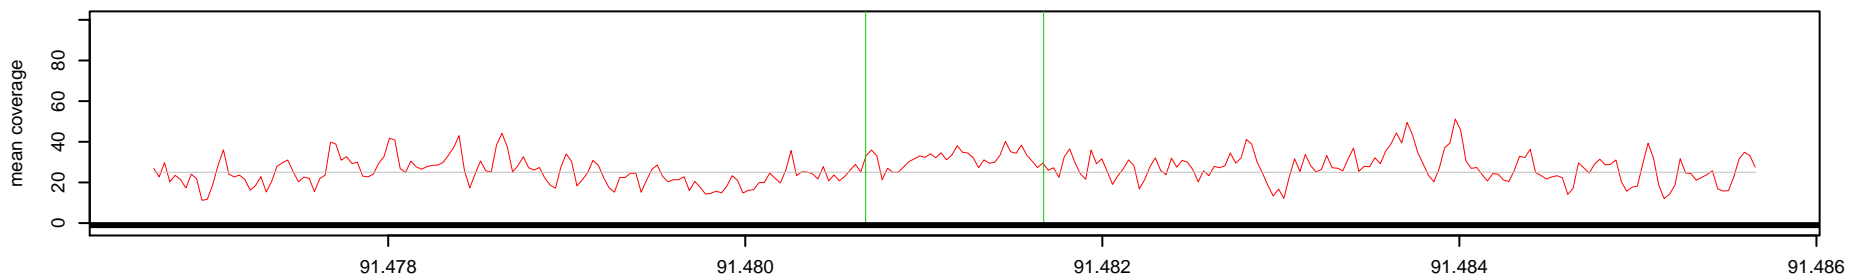

Log2( AK1 read depth / NA10851 read depth)

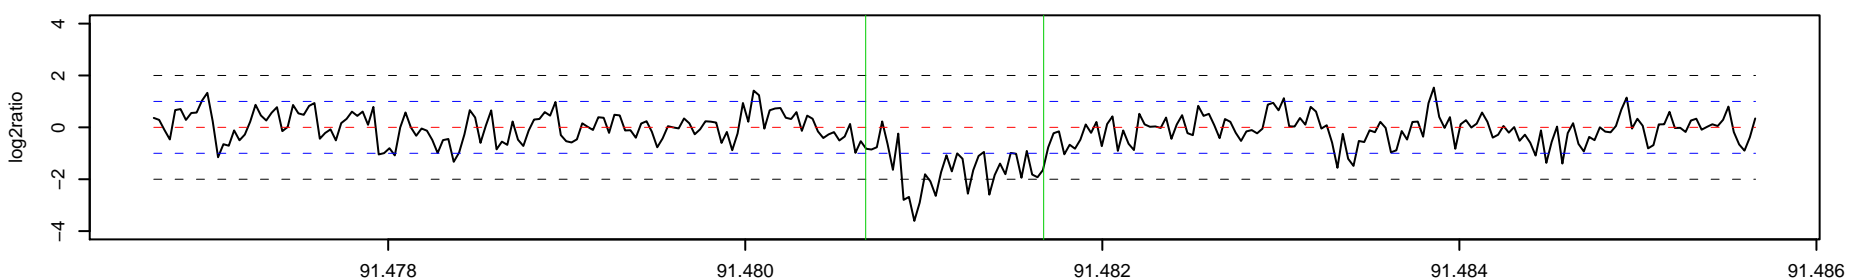

275 \_ AK1 Chr 6 : 100141200 – 100142047 , 848 bp (aCGH relative log2ratio= -3.25 )

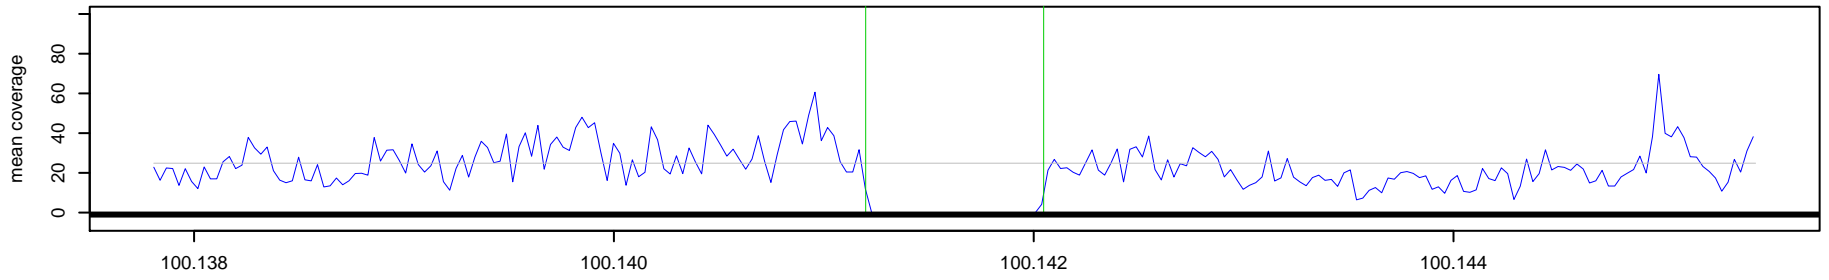

275 \_ NA10851 Chr 6 : 100141200 – 100142047 , 848 bp (aCGH relative log2ratio= -3.25 )

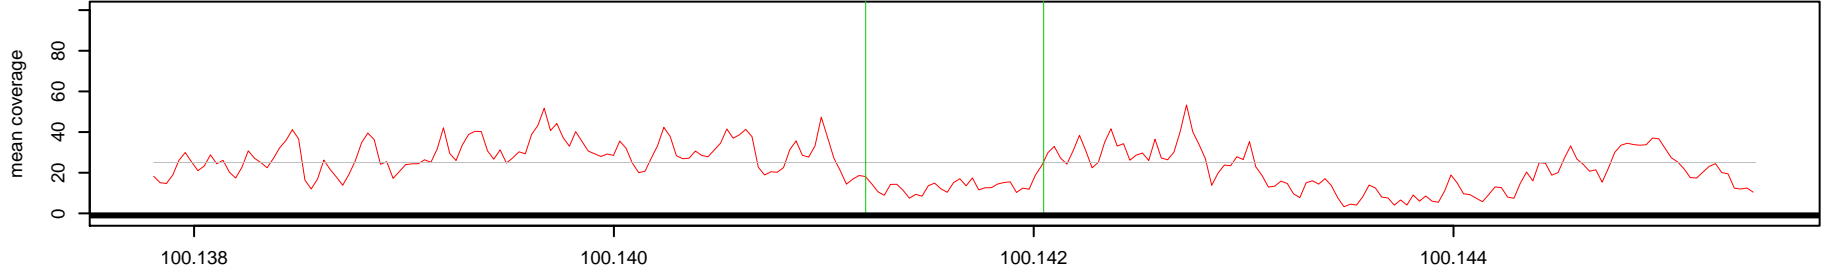

Log2( AK1 read depth / NA10851 read depth)

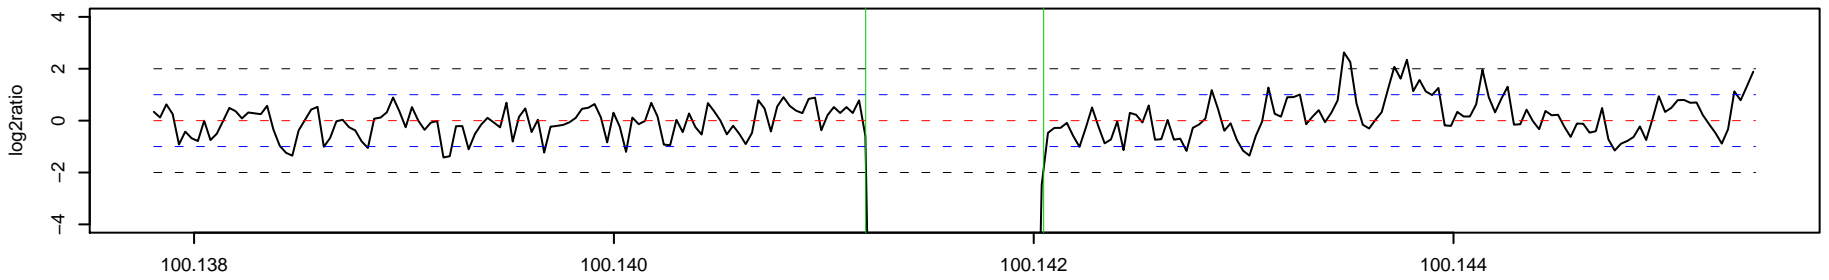

276 \_ AK1 Chr 6 : 102921838 – 102922489 , 652 bp (aCGH relative log2ratio= 1.05 )

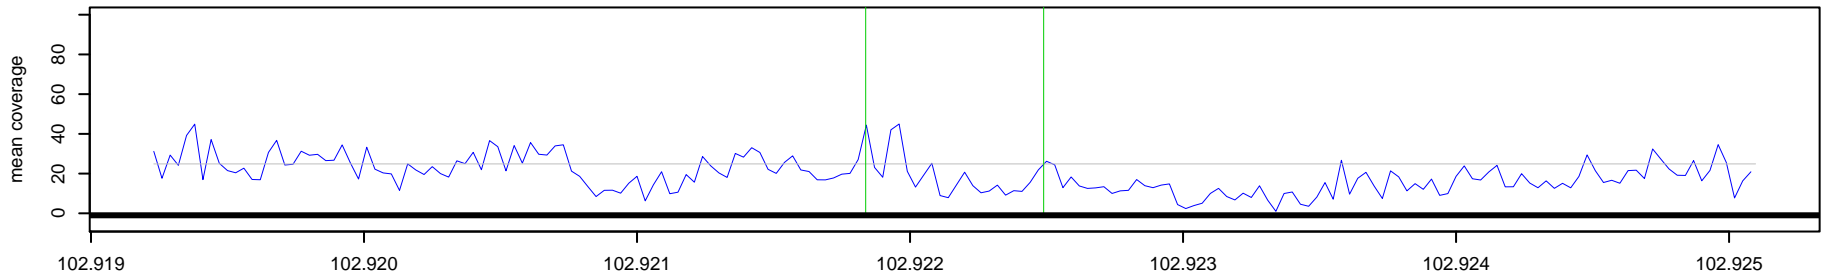

276 \_ NA10851 Chr 6 : 102921838 – 102922489 , 652 bp (aCGH relative log2ratio= 1.05 )

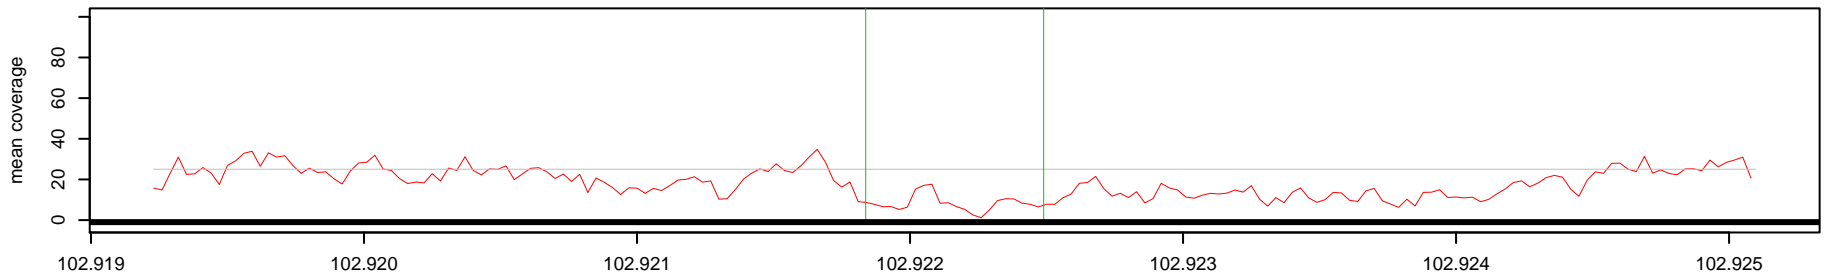

Log2( AK1 read depth / NA10851 read depth)

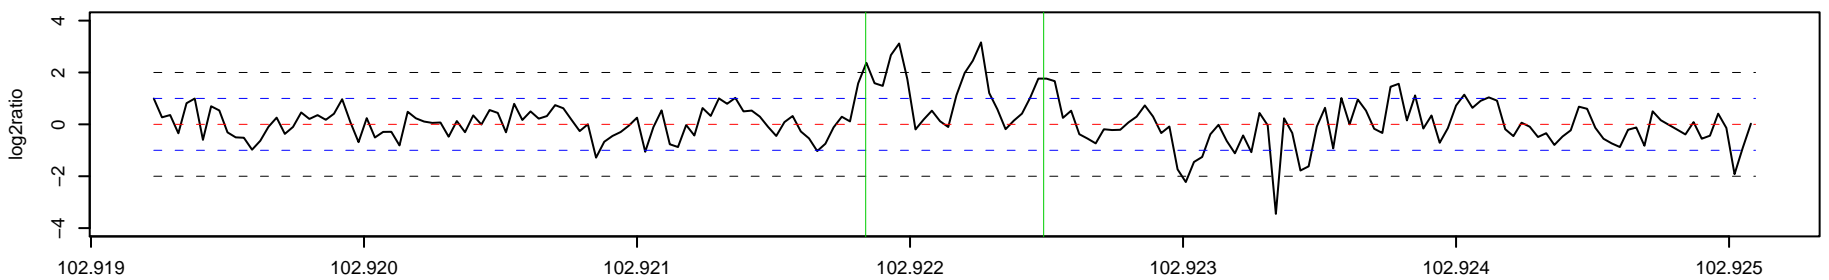

277 \_ AK1 Chr 6 : 103844160 – 103868469 , 24310 bp (aCGH relative log2ratio= 2.64 )

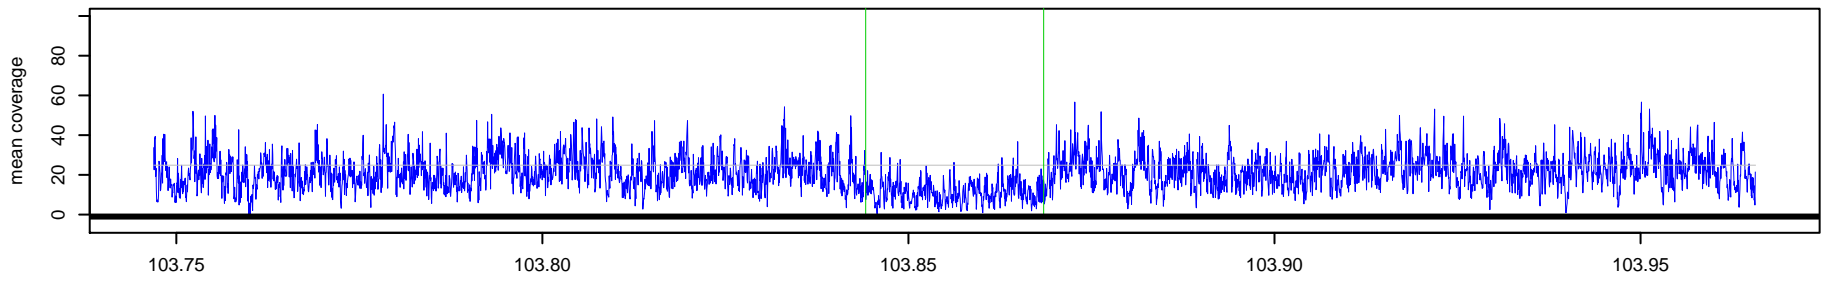

277 \_ NA10851 Chr 6 : 103844160 – 103868469 , 24310 bp (aCGH relative log2ratio= 2.64 )

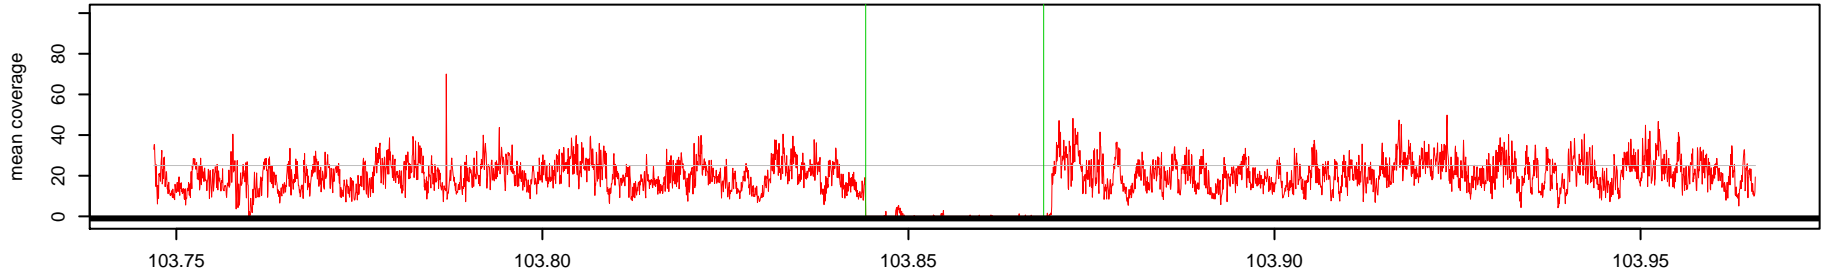

Log2( AK1 read depth / NA10851 read depth)

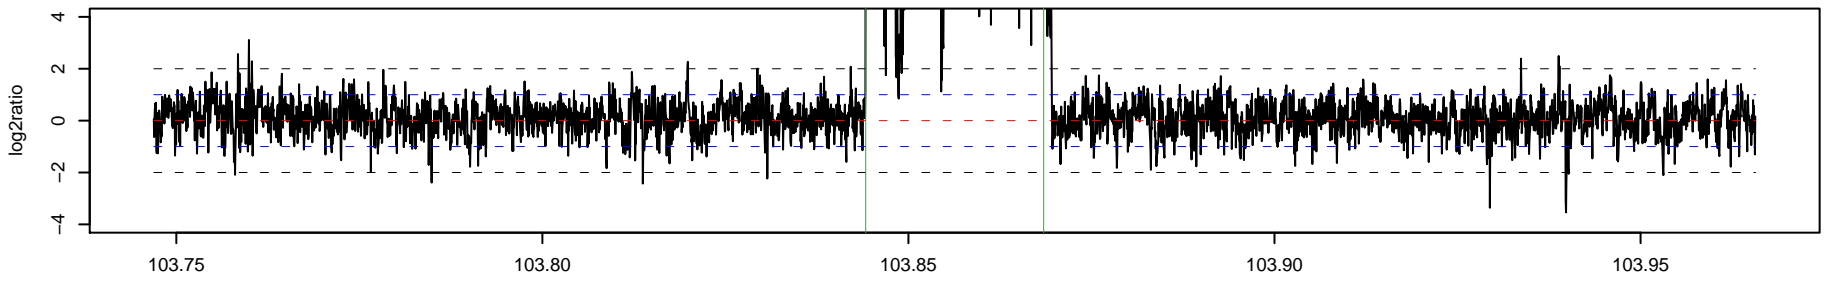

278 \_ AK1 Chr 6 : 103901170 – 103901938 , 769 bp (aCGH relative log2ratio= 0.54 )

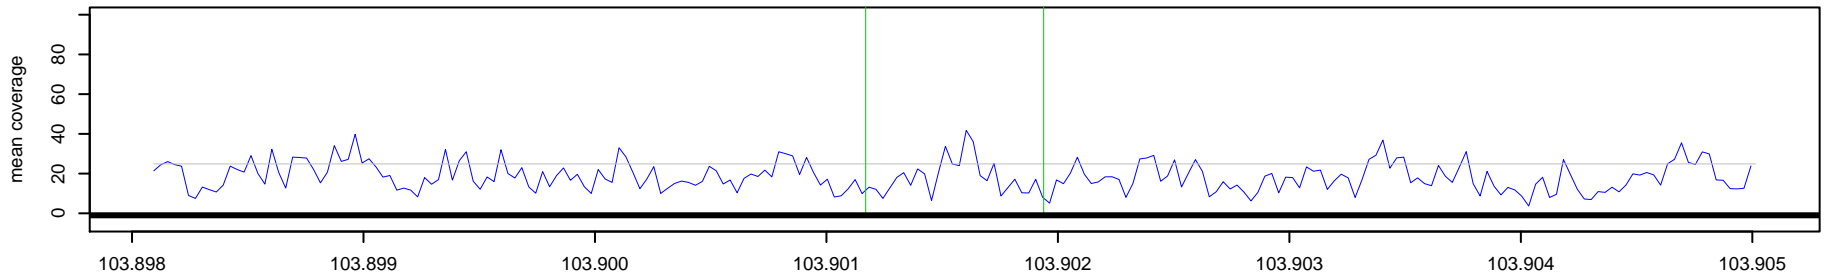

278 \_ NA10851 Chr 6 : 103901170 – 103901938 , 769 bp (aCGH relative log2ratio= 0.54 )

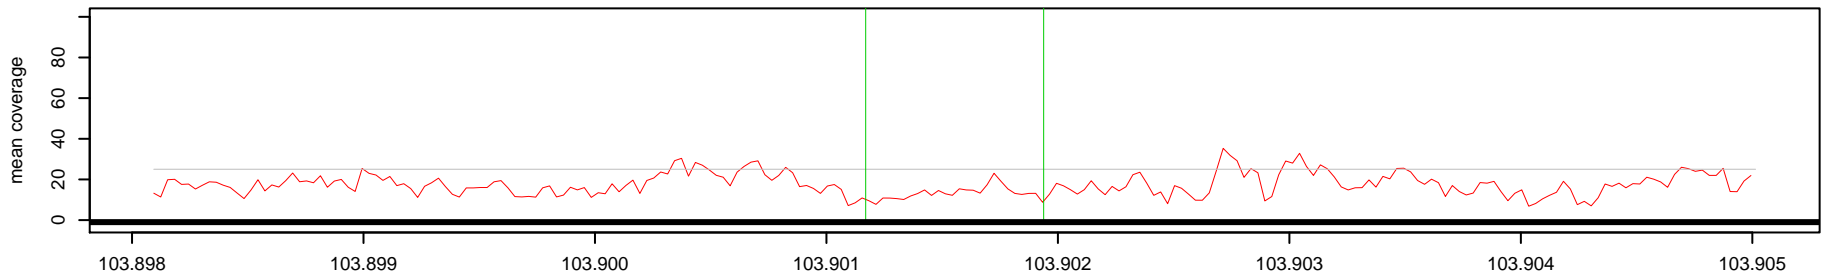

Log2( AK1 read depth / NA10851 read depth)

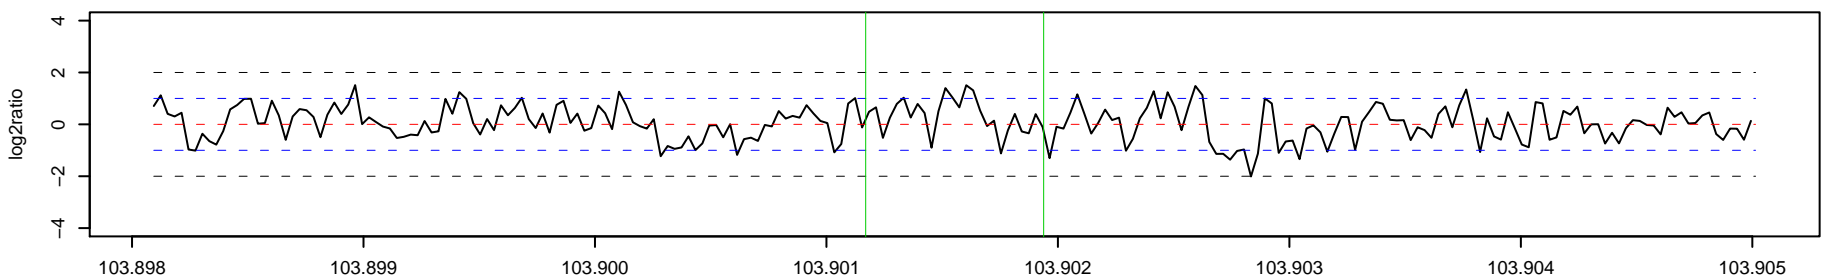

279\_AK1 Chr 6 : 115275481 – 115276147 , 667 bp (aCGH relative log2ratio= -0.95 )

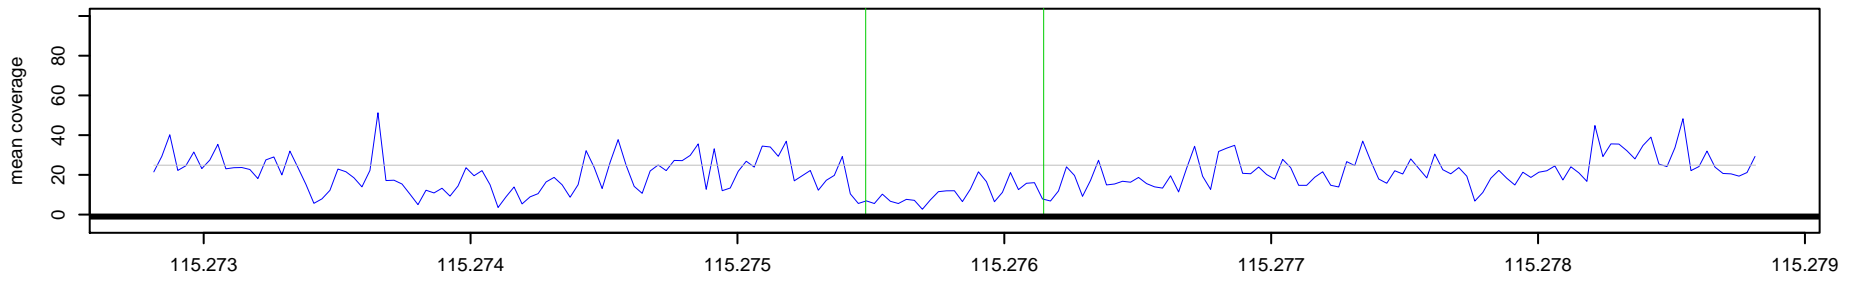

279\_NA10851 Chr 6 : 115275481 – 115276147 , 667 bp (aCGH relative log2ratio= -0.95 )

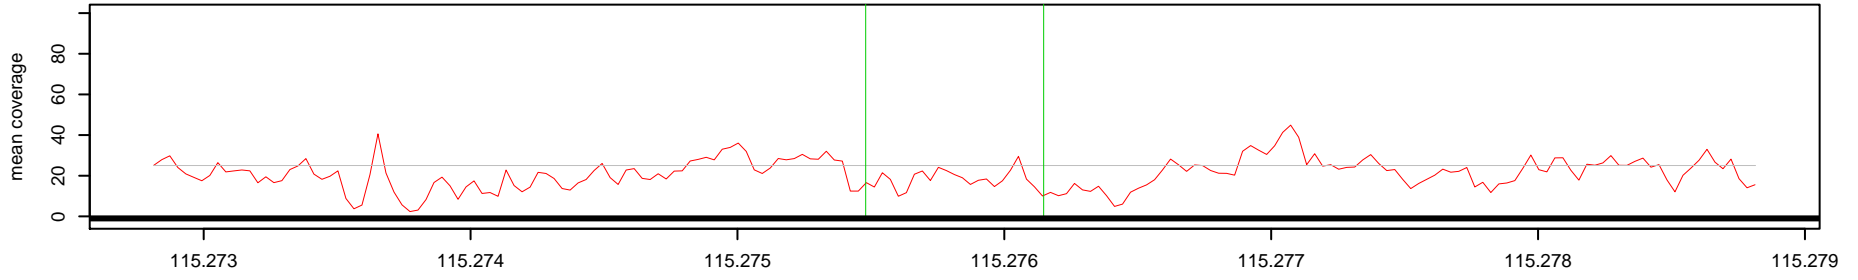

Log2( AK1 read depth / NA10851 read depth)

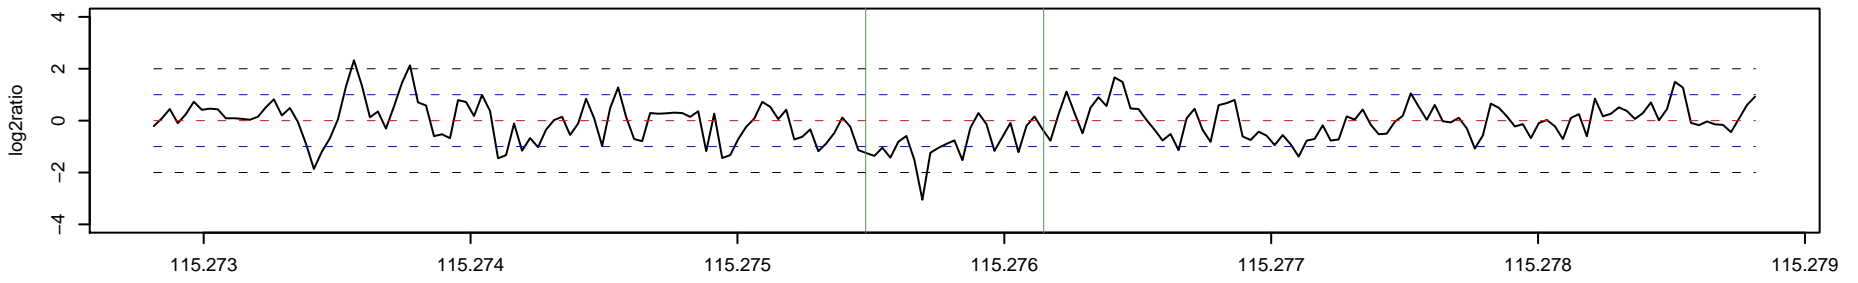

280\_AK1 Chr 6 : 118137437 – 118138539 , 1103 bp (aCGH relative log2ratio= 0.30 )

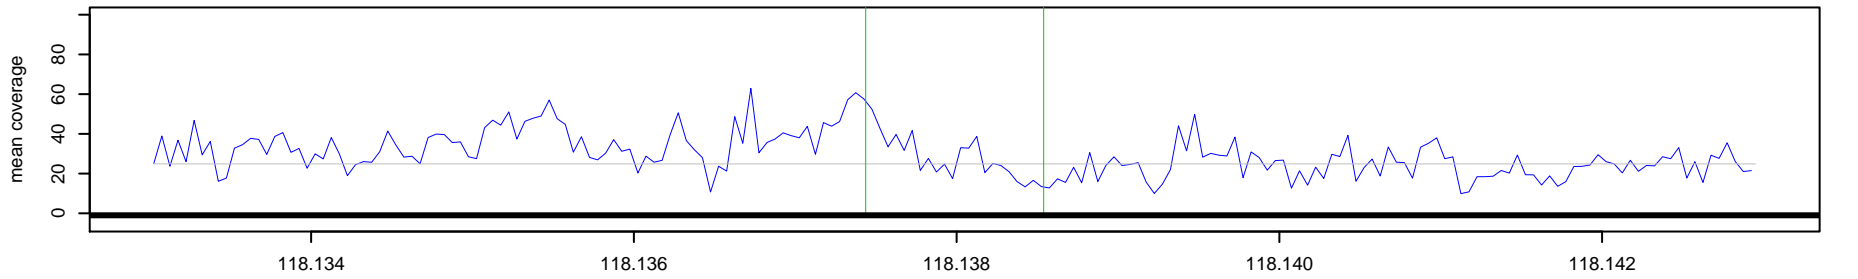

280\_NA10851 Chr 6 : 118137437 – 118138539 , 1103 bp (aCGH relative log2ratio= 0.30 )

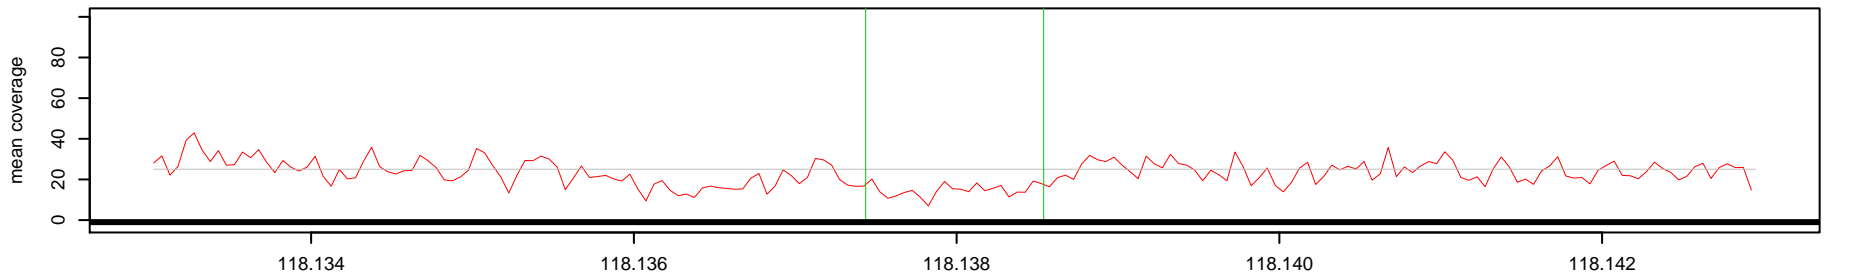

Log2( AK1 read depth / NA10851 read depth)

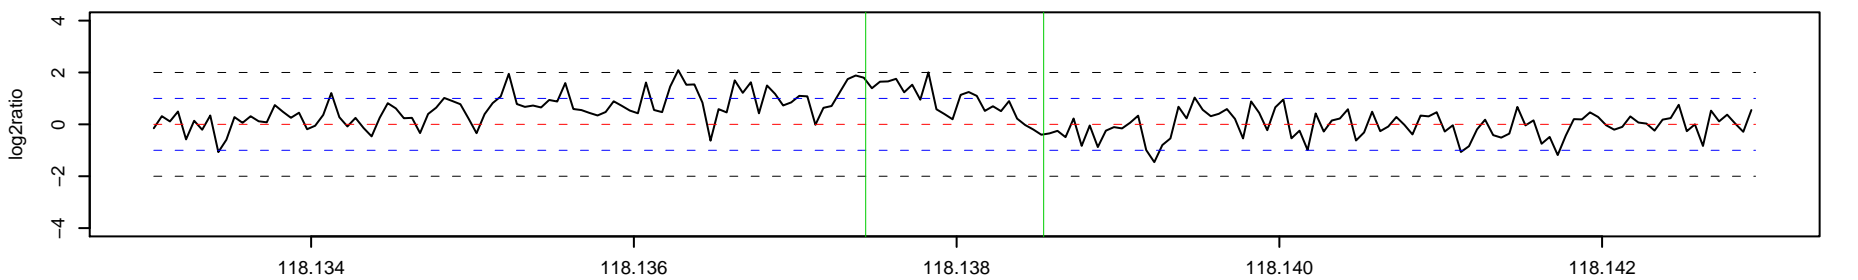



281 \_ AK1 Chr 6 : 133787771 - 133789011 , 1241 bp (aCGH relative log2ratio= -1.03 )

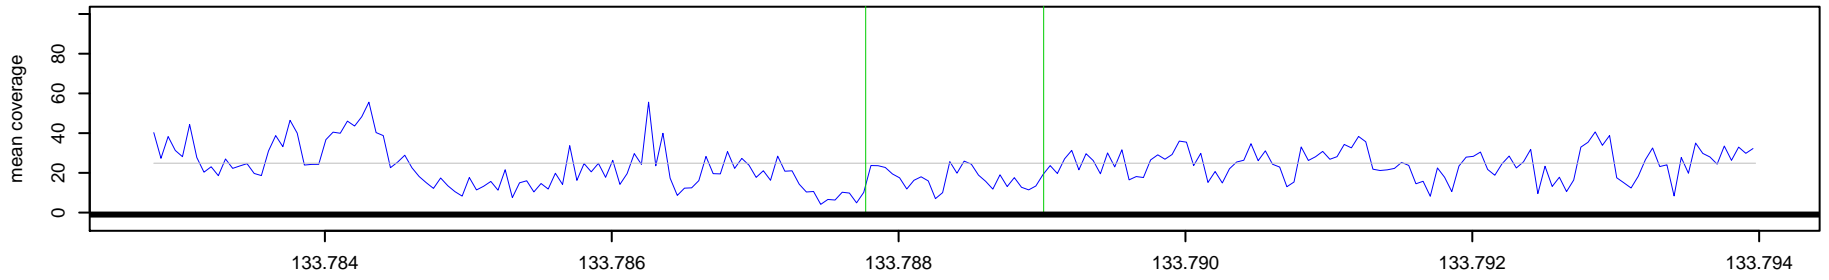

281 \_ NA10851 Chr 6 : 133787771 - 133789011 , 1241 bp (aCGH relative log2ratio= -1.03 )

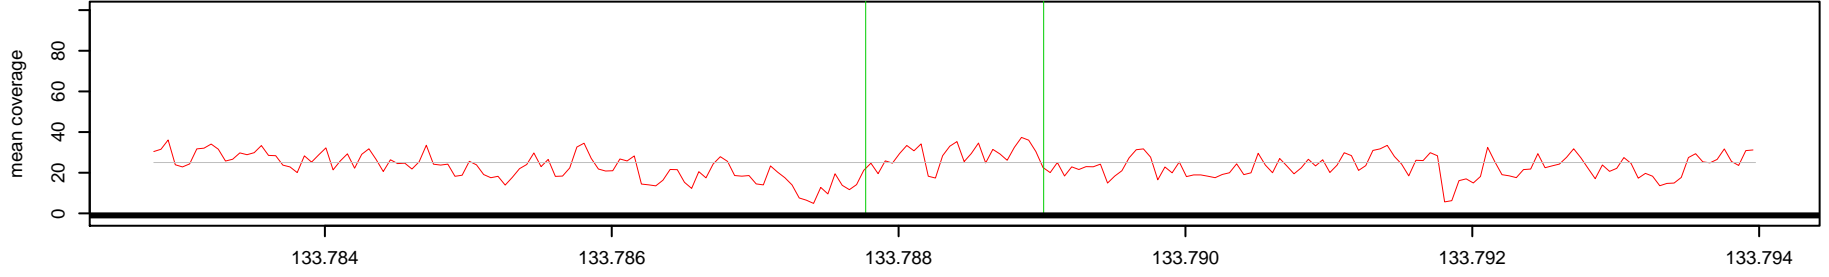

Log2( AK1 read depth / NA10851 read depth)

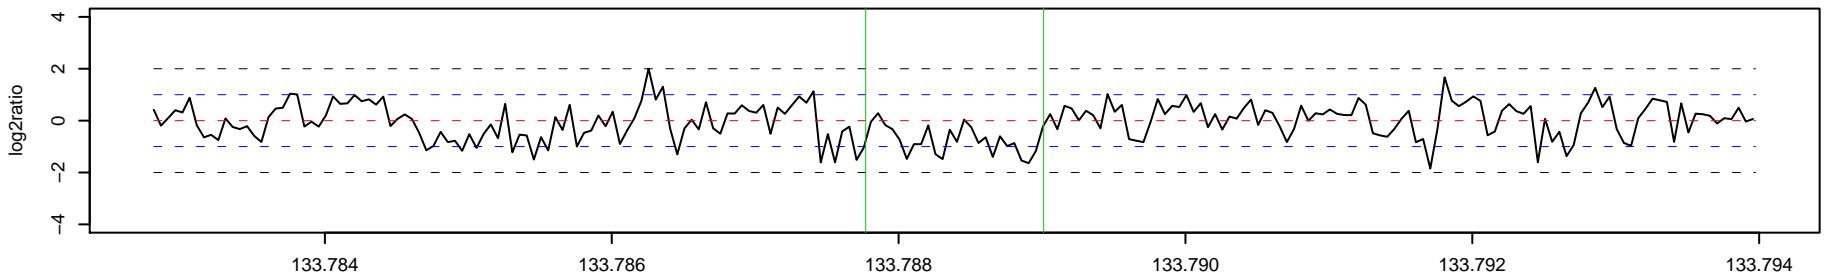

282 \_ AK1 Chr 6 : 134631402 - 134636027 , 4626 bp (aCGH relative log2ratio= -0.94 )

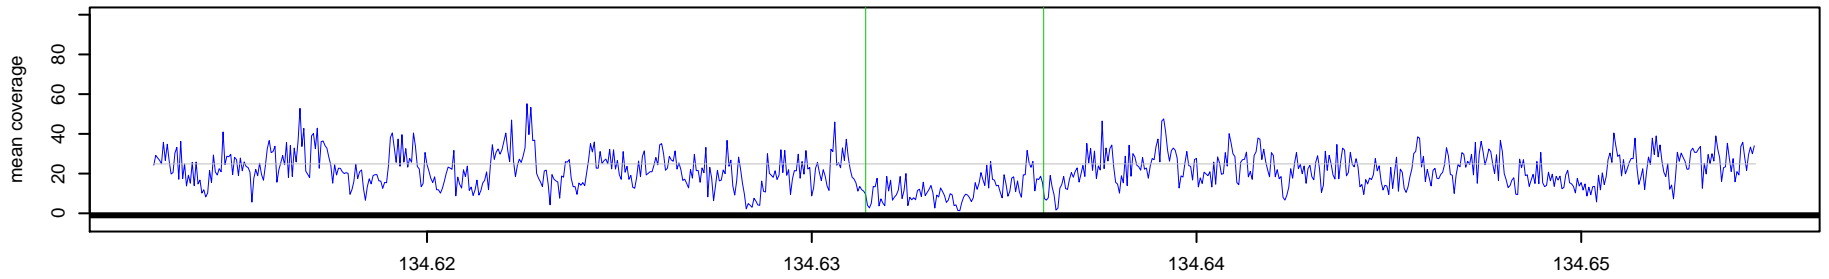

282 \_ NA10851 Chr 6 : 134631402 - 134636027 , 4626 bp (aCGH relative log2ratio= -0.94 )

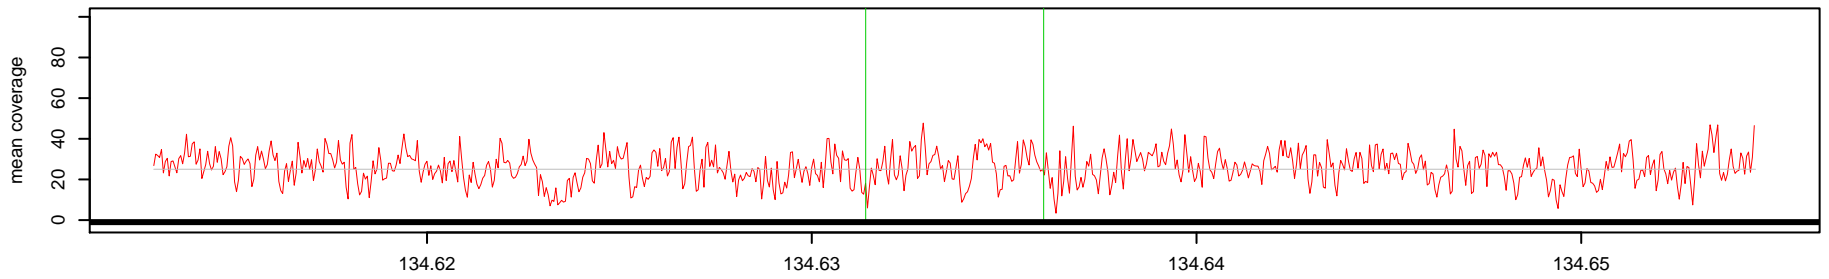

Log2( AK1 read depth / NA10851 read depth)

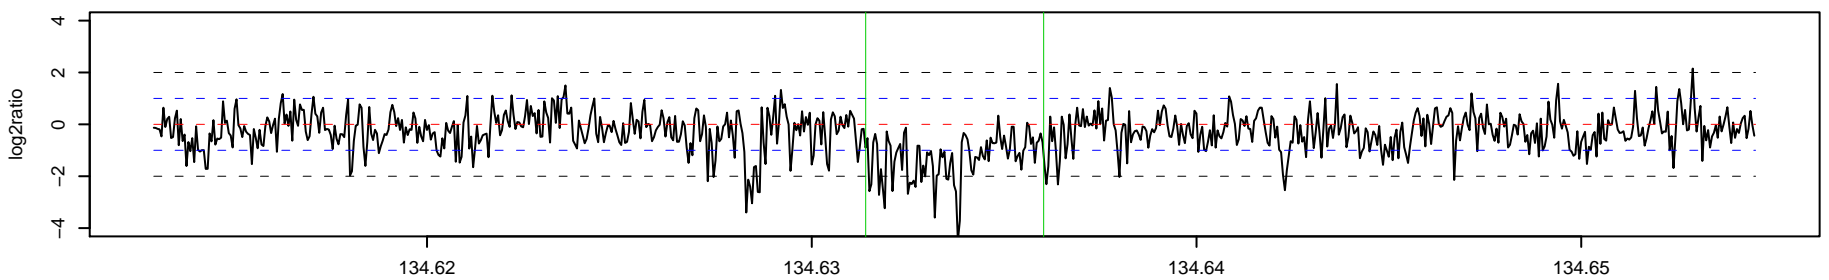

283\_AK1 Chr 6 : 135108651 - 135109401 , 751 bp (aCGH relative log2ratio= -0.52 )

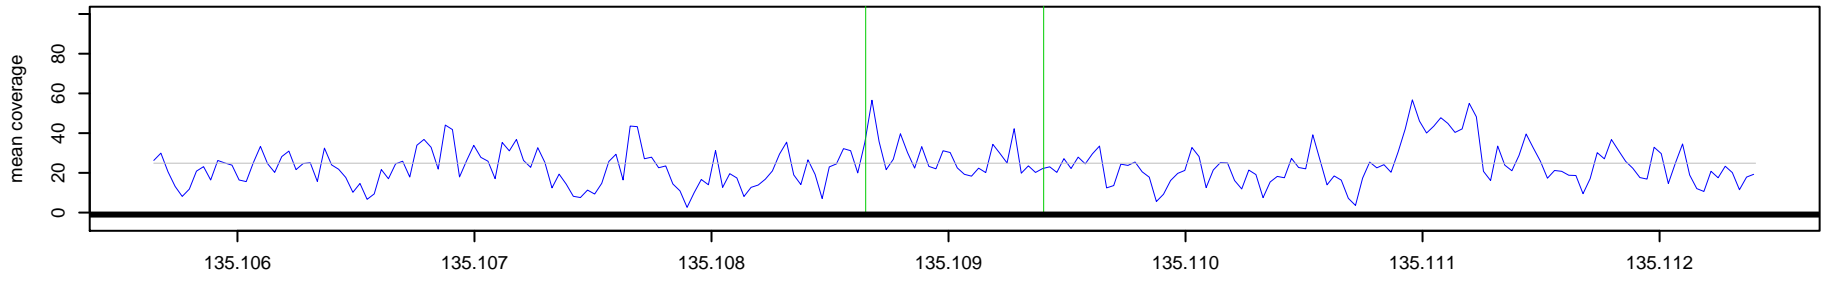

283\_NA10851 Chr 6 : 135108651 - 135109401 , 751 bp (aCGH relative log2ratio= -0.52 )

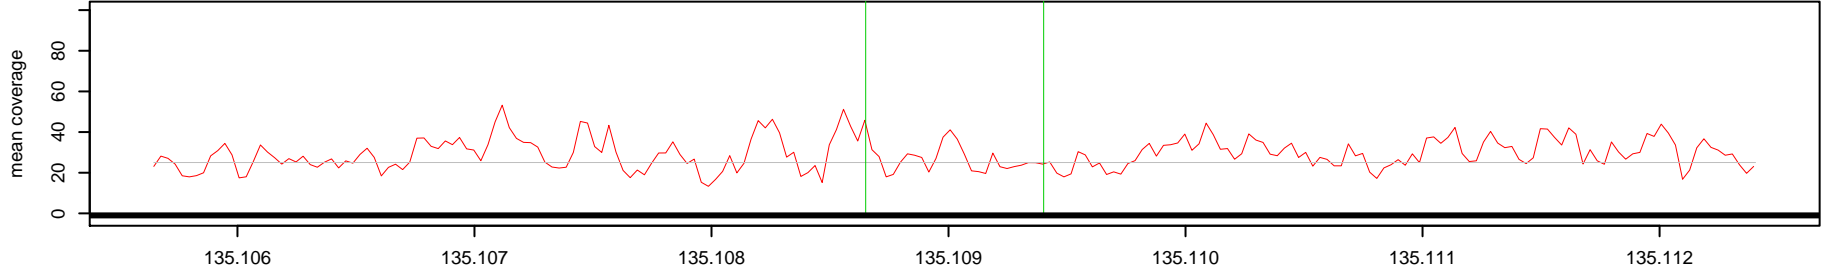

Log2( AK1 read depth / NA10851 read depth)

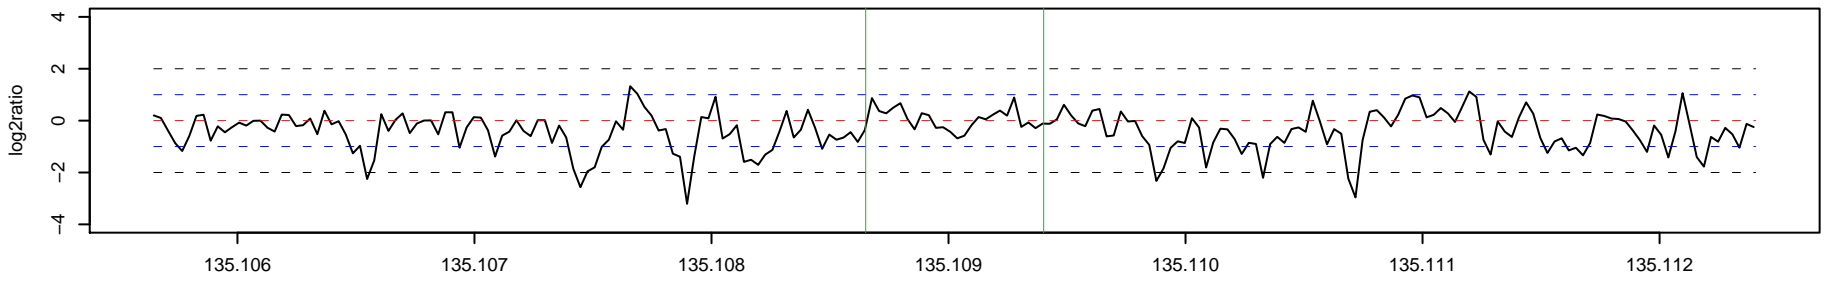

284\_AK1 Chr 6 : 136893365 - 136894617 , 1253 bp (aCGH relative log2ratio= -1.01 )

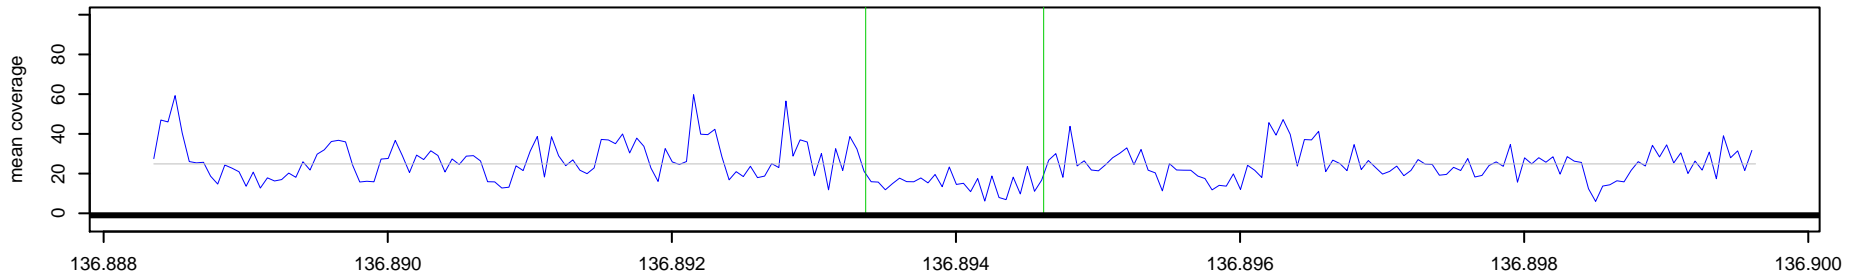

284\_NA10851 Chr 6 : 136893365 - 136894617 , 1253 bp (aCGH relative log2ratio= -1.01 )

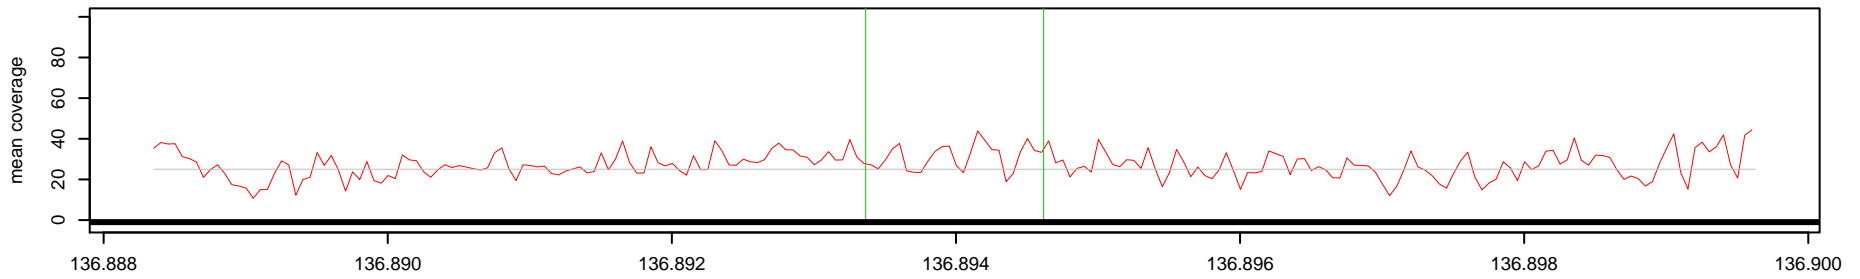

Log2( AK1 read depth / NA10851 read depth)

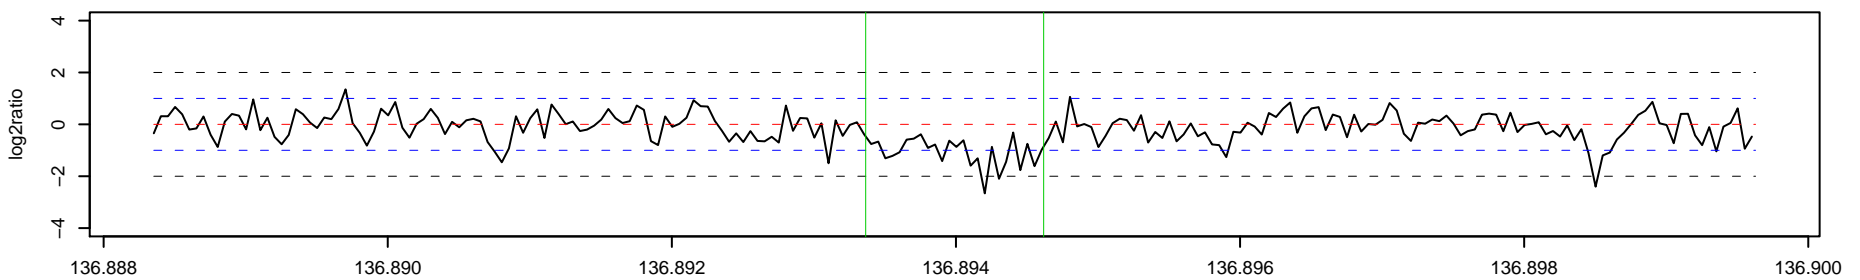

285 \_ AK1 Chr 6 : 139645217 – 139648811 , 3595 bp (aCGH relative log2ratio= 0.79 )

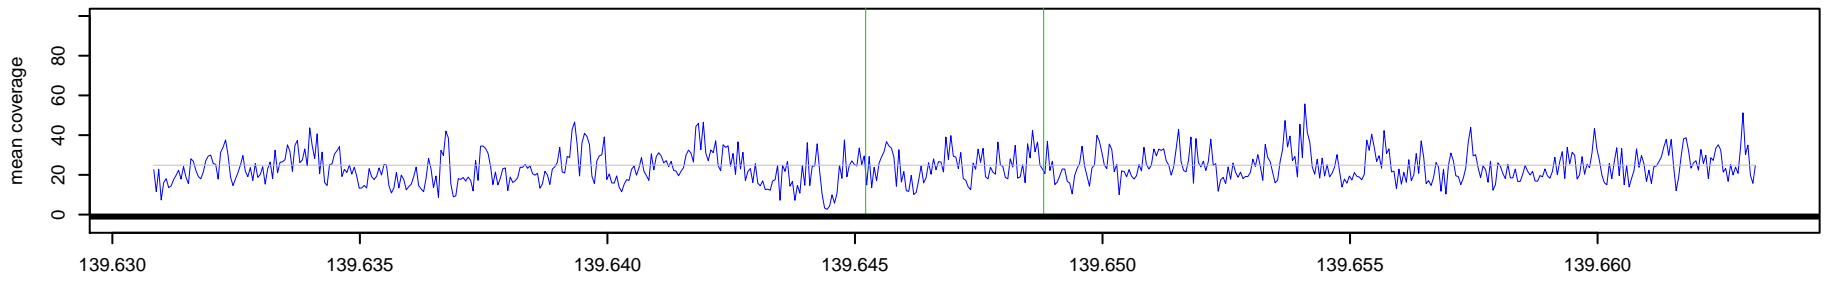

285 \_ NA10851 Chr 6 : 139645217 – 139648811 , 3595 bp (aCGH relative log2ratio= 0.79 )

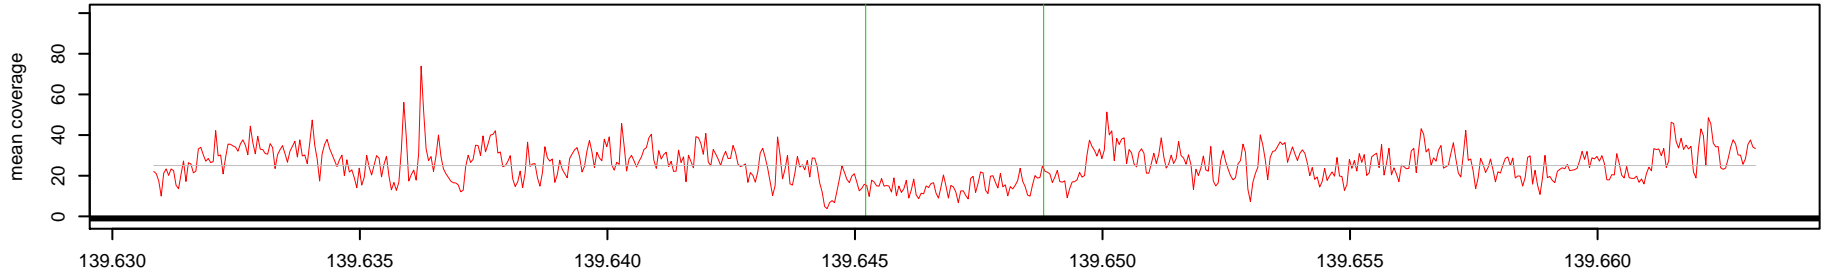

Log2( AK1 read depth / NA10851 read depth)

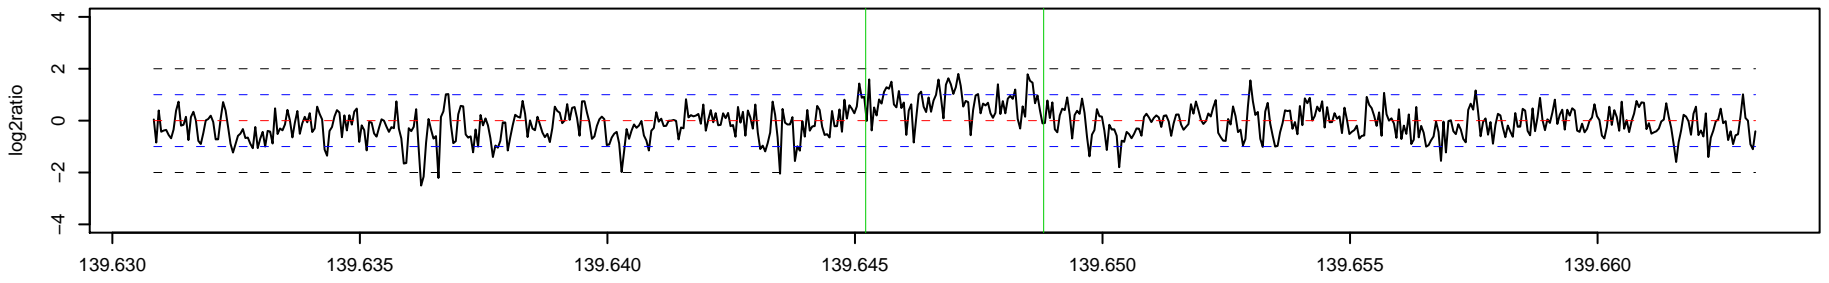

286 \_ AK1 Chr 6 : 141597643 – 141599276 , 1634 bp (aCGH relative log2ratio= -0.50 )

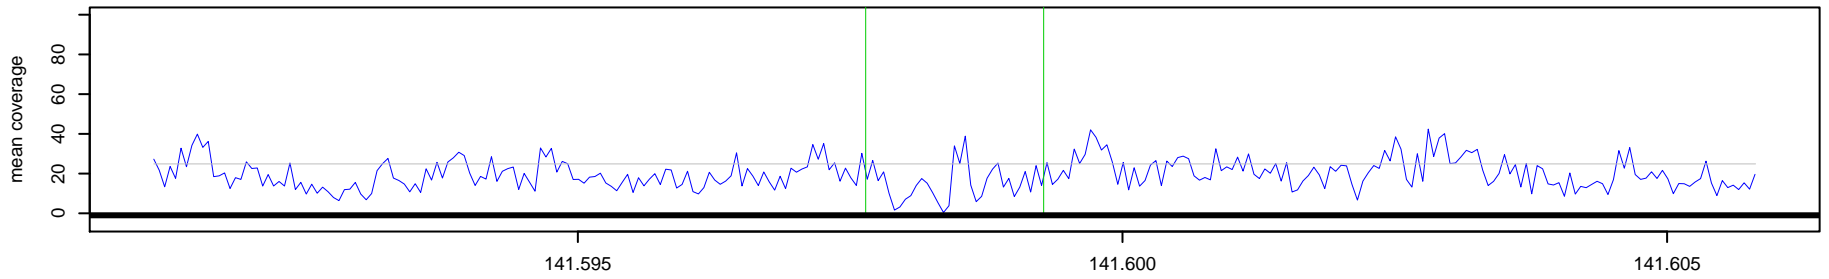

286 \_ NA10851 Chr 6 : 141597643 – 141599276 , 1634 bp (aCGH relative log2ratio= -0.50 )

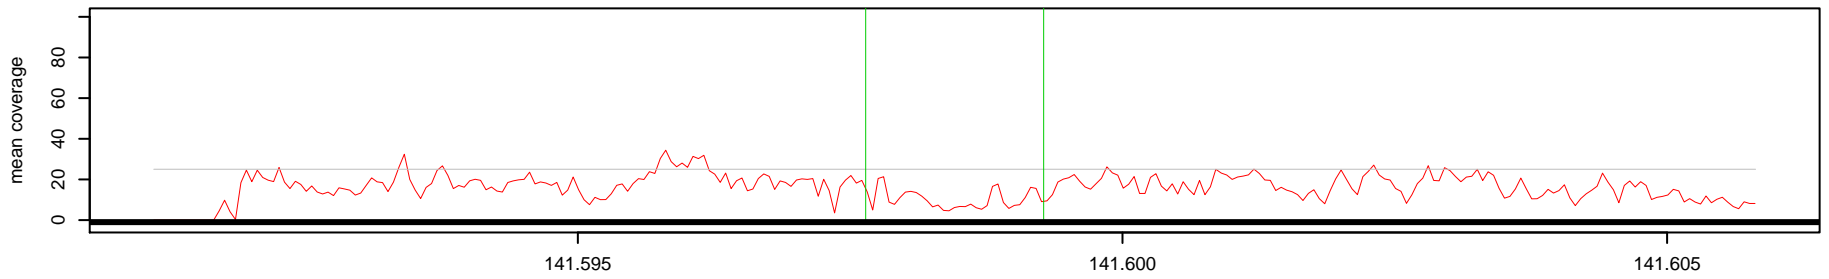

Log2( AK1 read depth / NA10851 read depth)

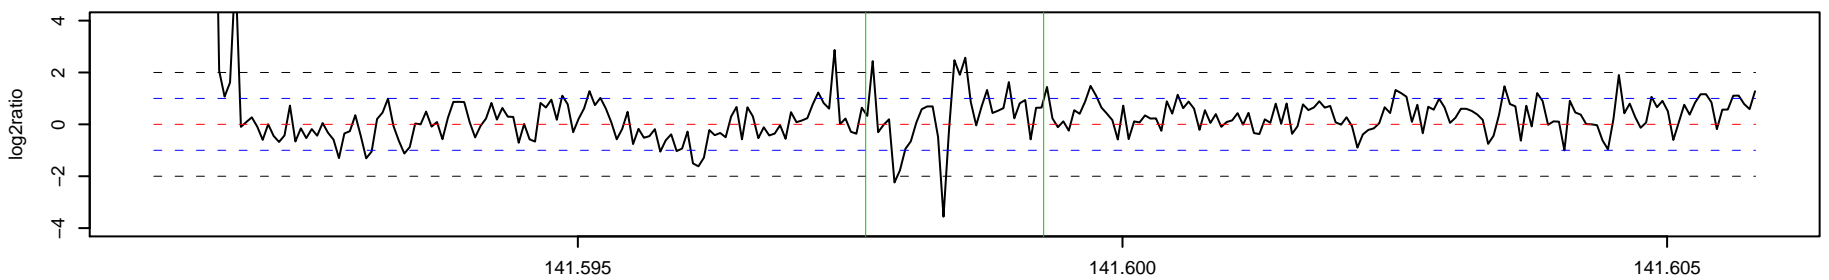

287 \_ AK1 Chr 6 : 151527126 – 151528684 , 1559 bp (aCGH relative log2ratio= -0.65 )

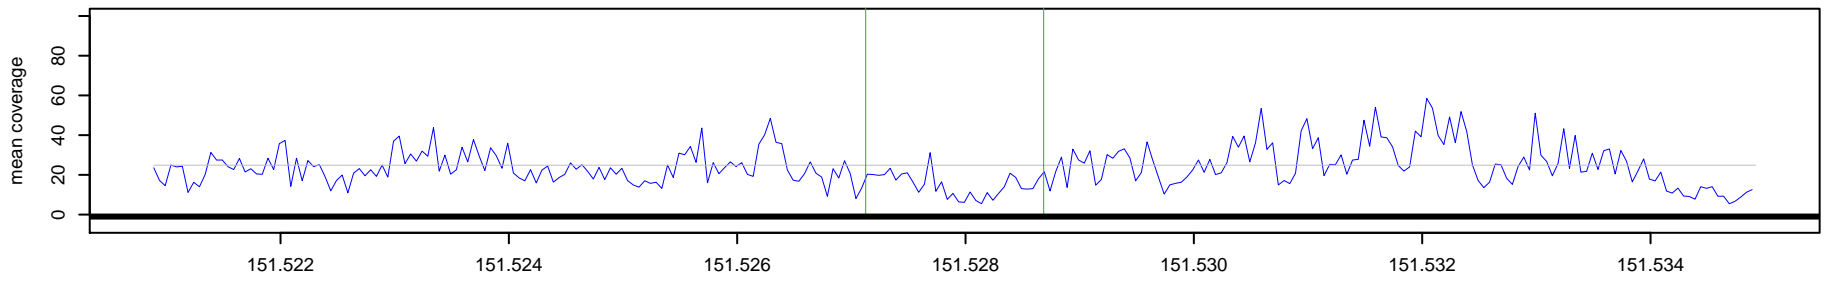

287 \_ NA10851 Chr 6 : 151527126 – 151528684 , 1559 bp (aCGH relative log2ratio= -0.65 )

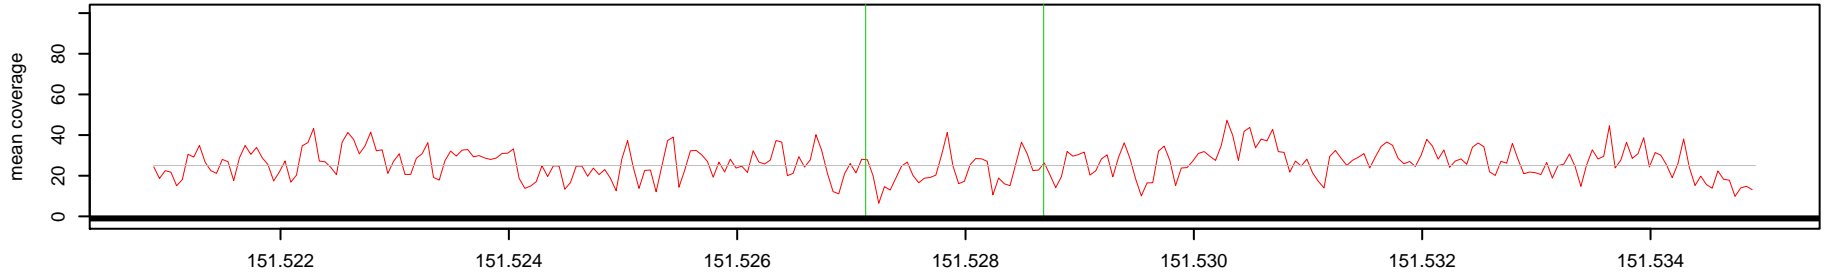

Log2( AK1 read depth / NA10851 read depth)

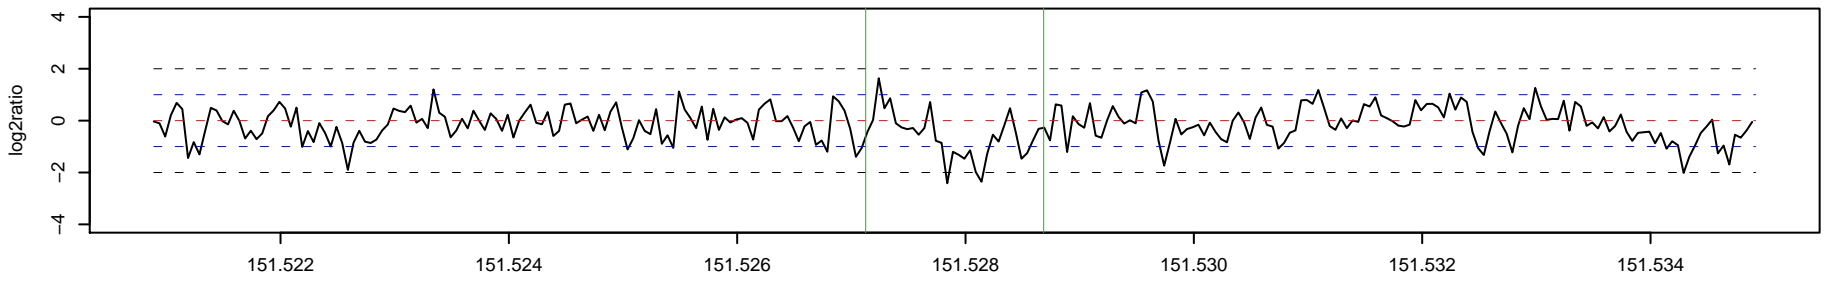

288 \_ AK1 Chr 6 : 151548333 – 151554146 , 5814 bp (aCGH relative log2ratio= -0.89 )

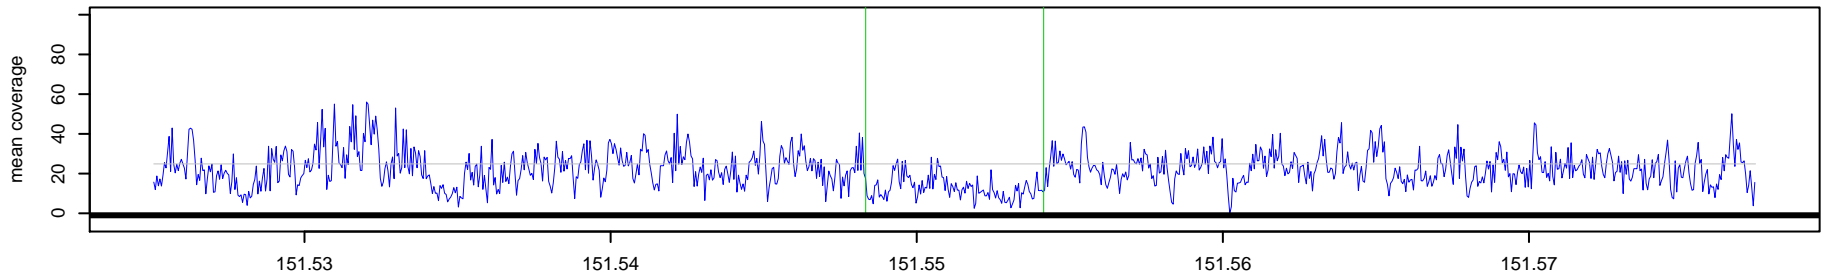

288 \_ NA10851 Chr 6 : 151548333 – 151554146 , 5814 bp (aCGH relative log2ratio= -0.89 )

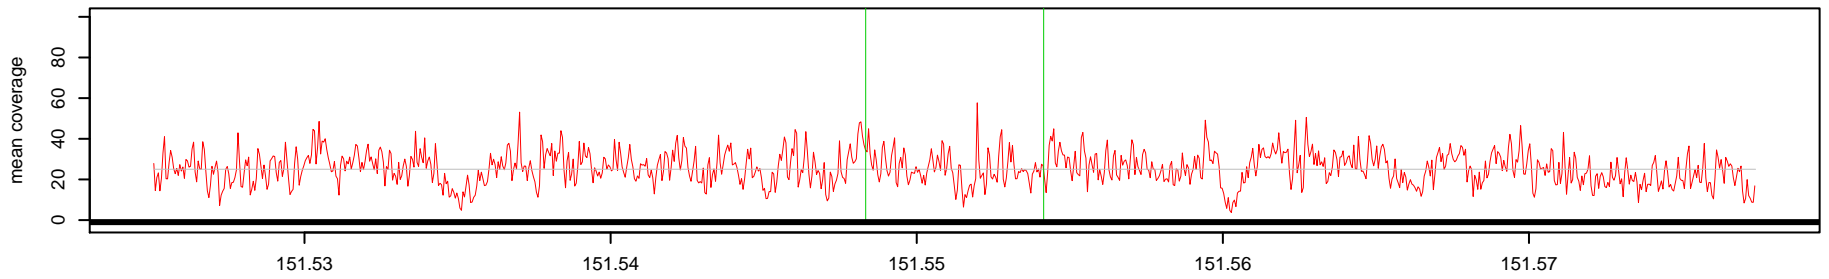

Log2( AK1 read depth / NA10851 read depth)

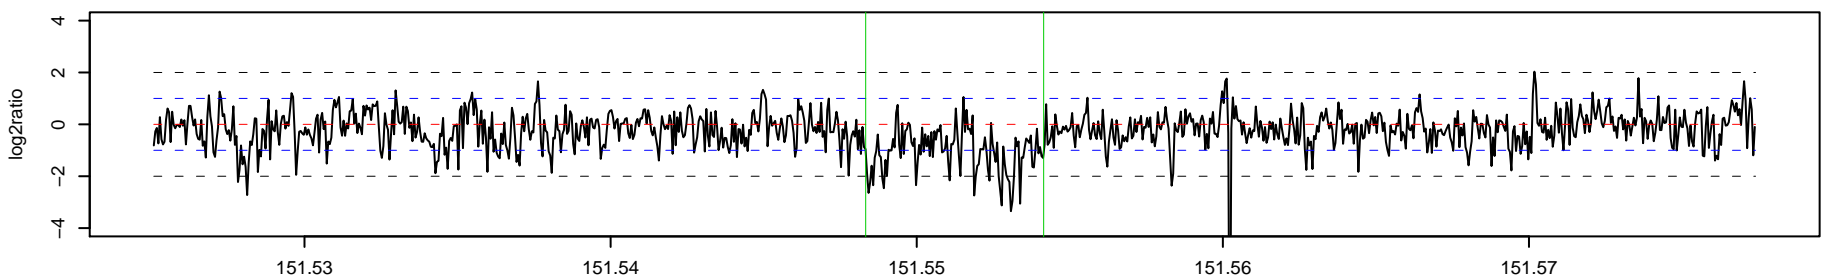

289 \_ AK1 Chr 6 : 153049543 – 153052983 , 3441 bp (aCGH relative log2ratio= 0.51 )

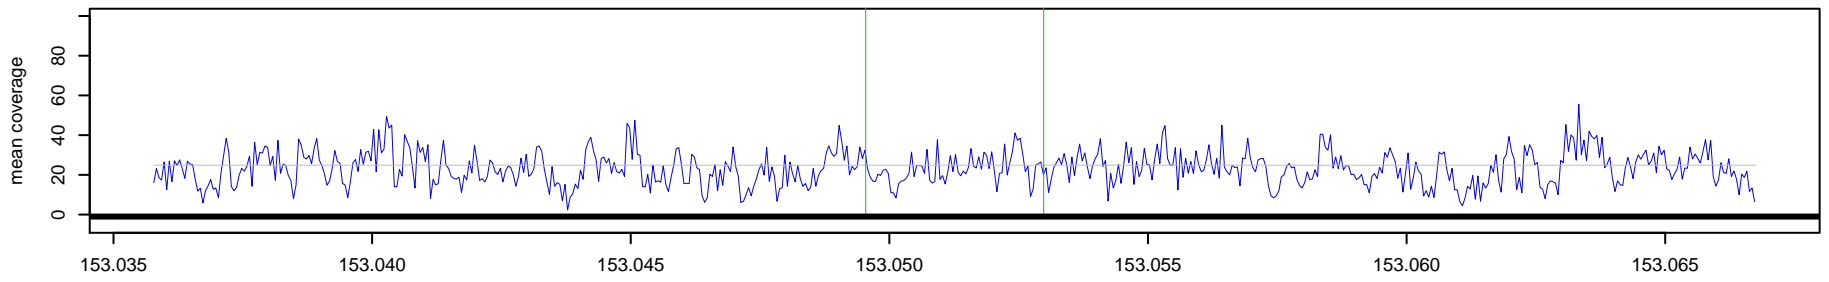

289 \_ NA10851 Chr 6 : 153049543 – 153052983 , 3441 bp (aCGH relative log2ratio= 0.51 )

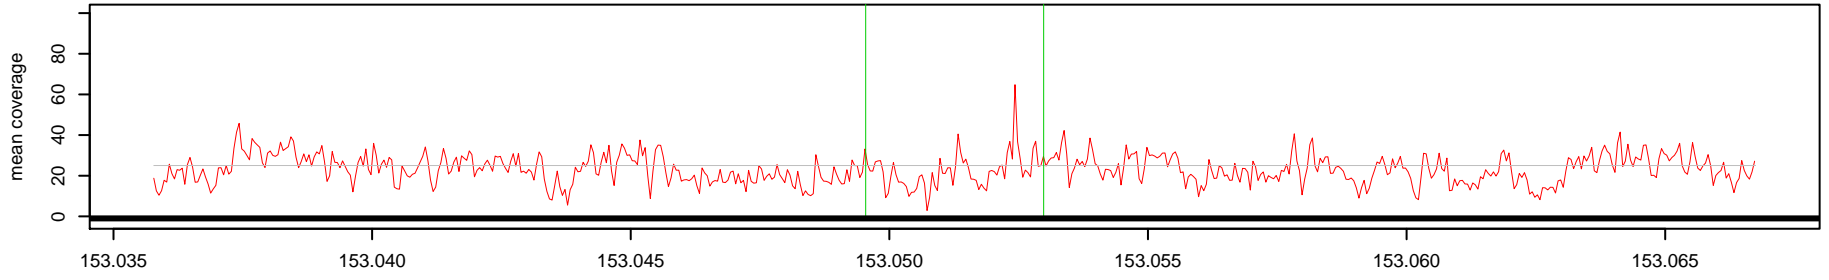

Log2( AK1 read depth / NA10851 read depth)

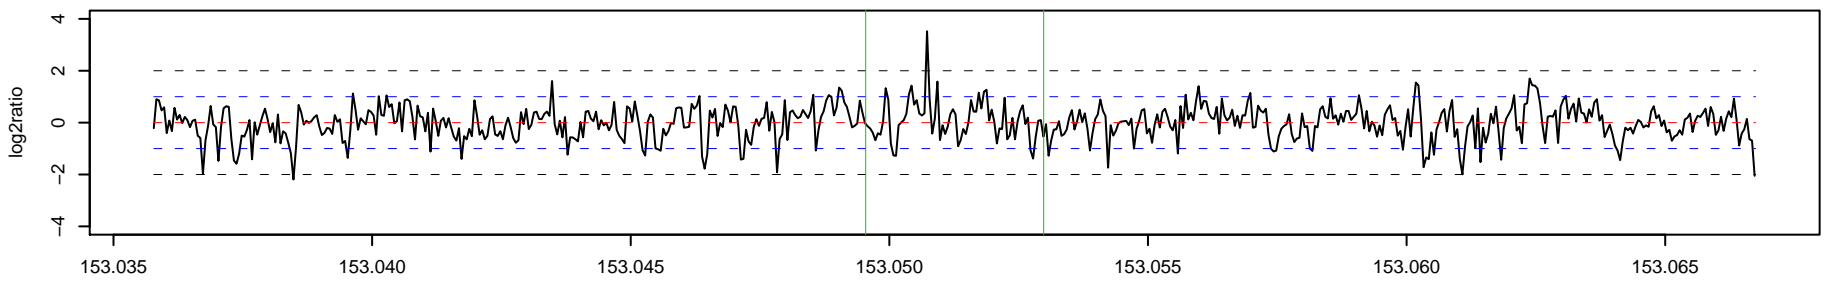

290 \_ AK1 Chr 6 : 154661651 – 154663264 , 1614 bp (aCGH relative log2ratio= 0.84 )

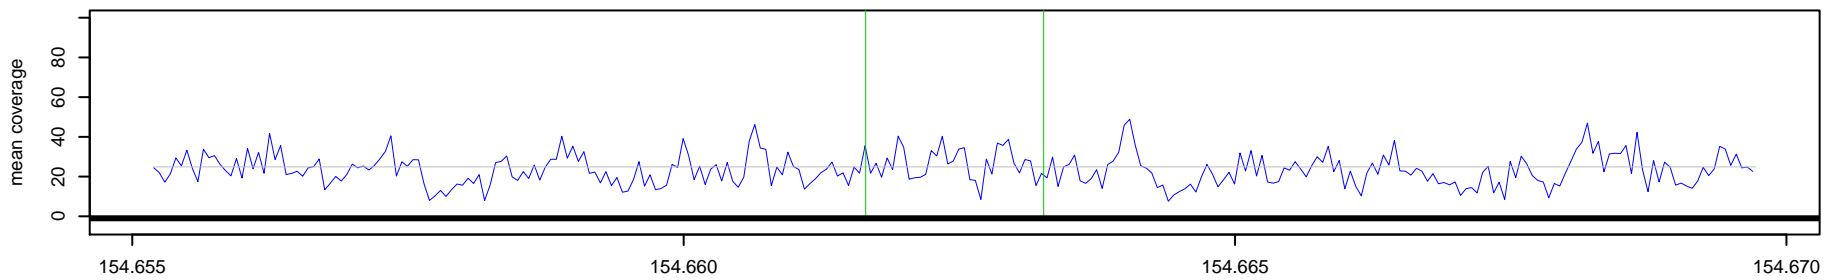

290 \_ NA10851 Chr 6 : 154661651 – 154663264 , 1614 bp (aCGH relative log2ratio= 0.84 )

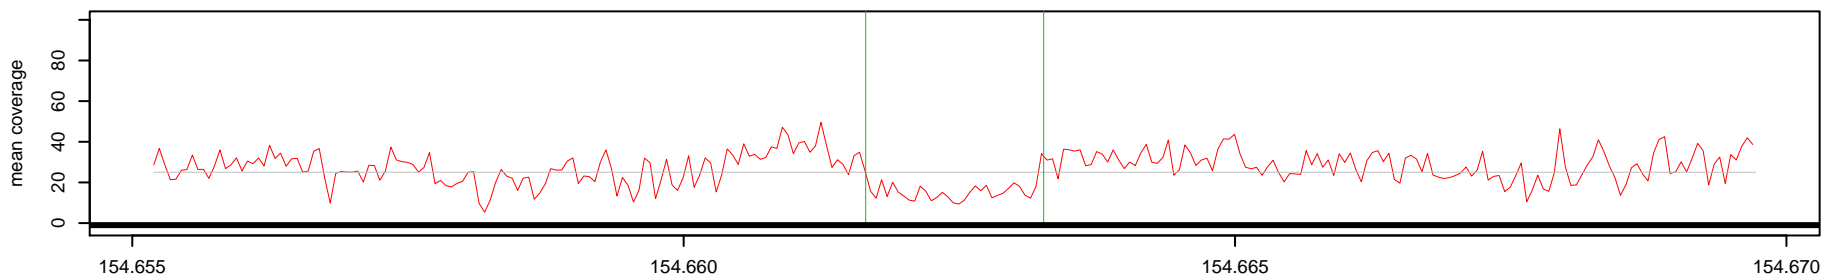

Log2( AK1 read depth / NA10851 read depth)

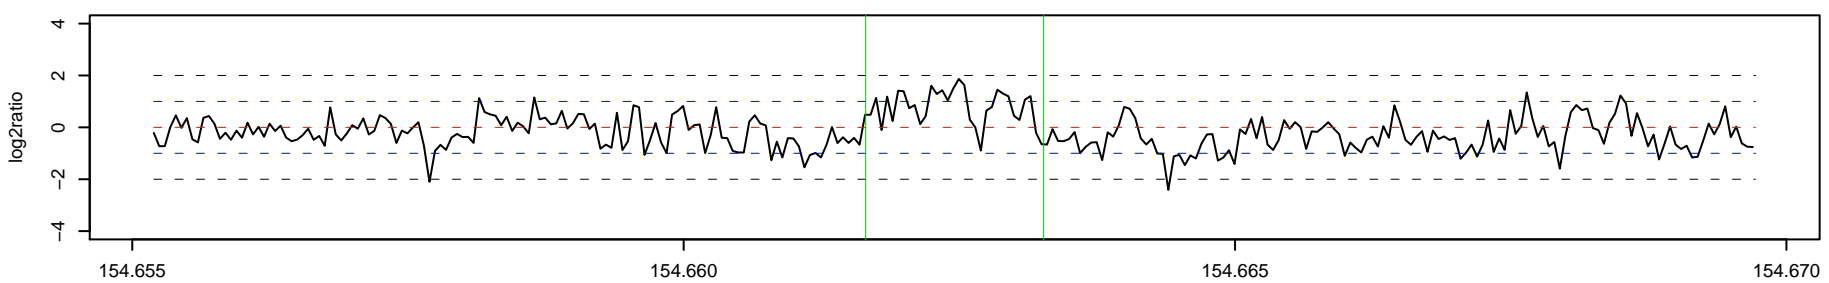

291 \_ AK1 Chr 6 : 160006908 – 160008109 , 1202 bp (aCGH relative log2ratio= -1.94 )

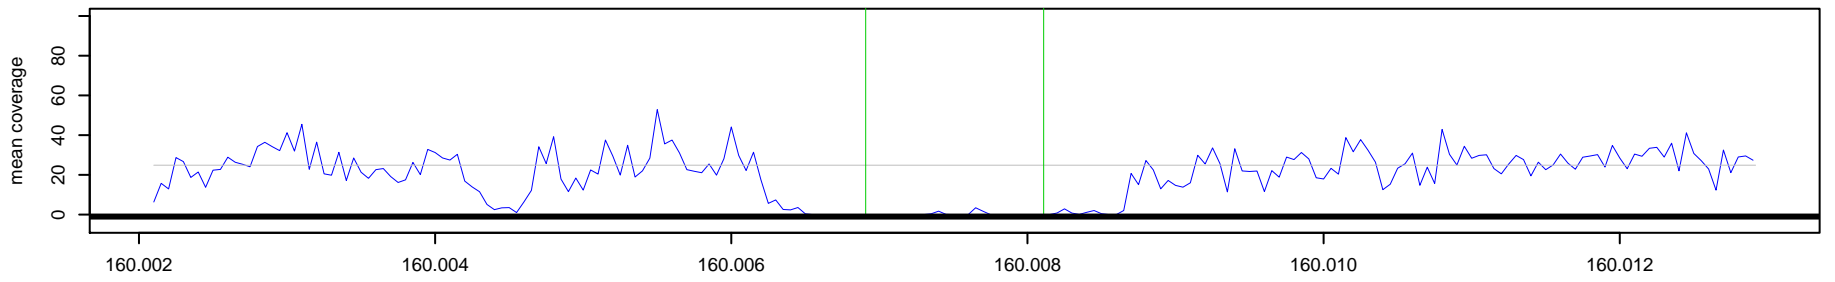

291 \_ NA10851 Chr 6 : 160006908 – 160008109 , 1202 bp (aCGH relative log2ratio= -1.94 )

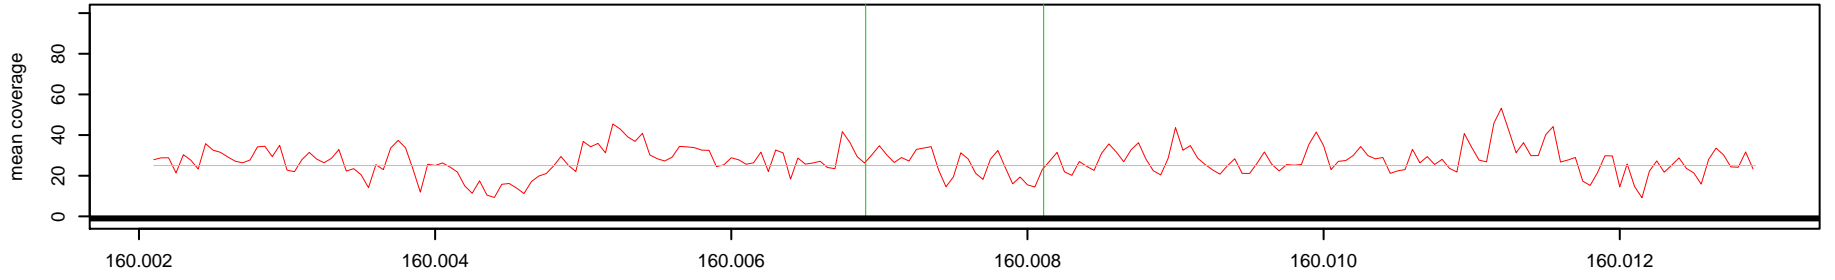

Log2( AK1 read depth / NA10851 read depth)

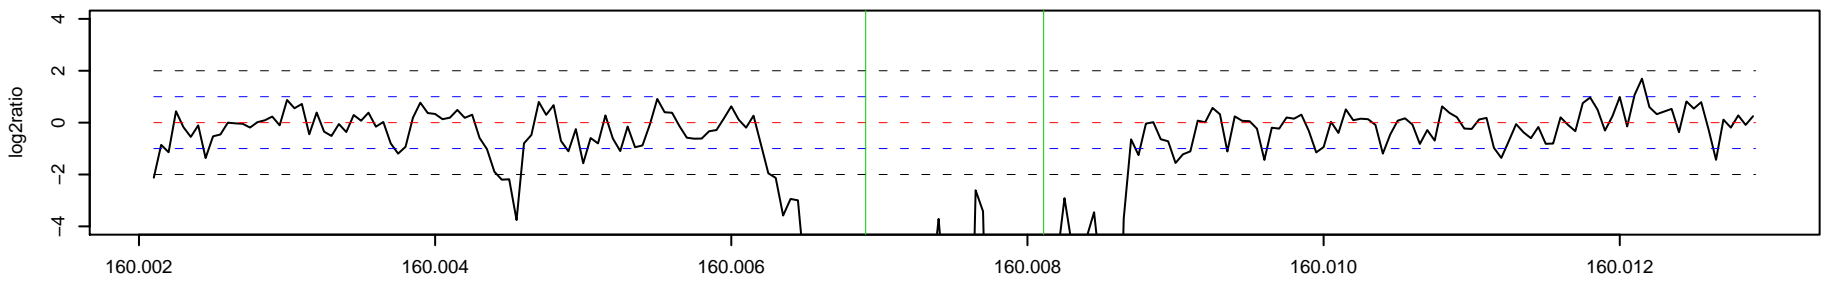

292 \_ AK1 Chr 6 : 161646683 – 161647678 , 996 bp (aCGH relative log2ratio= 0.71 )

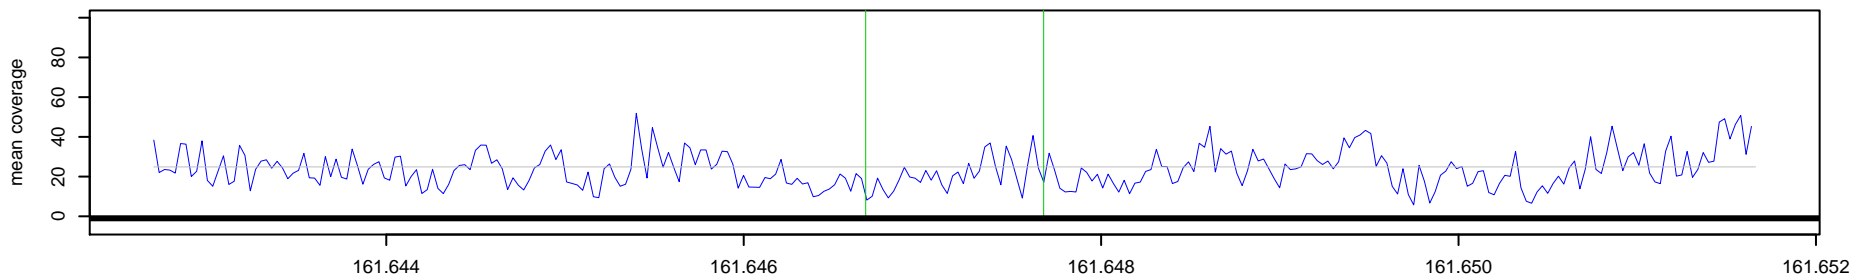

292 \_ NA10851 Chr 6 : 161646683 – 161647678 , 996 bp (aCGH relative log2ratio= 0.71 )

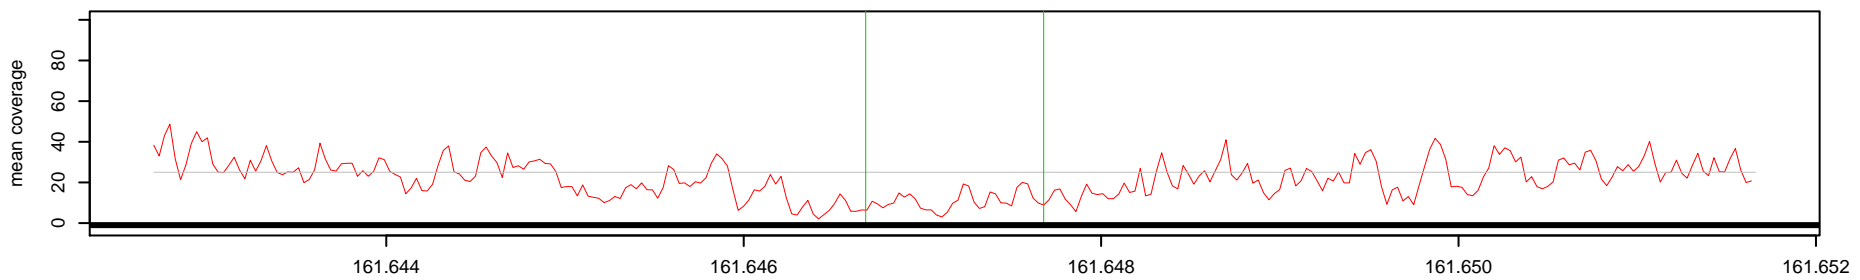

Log2( AK1 read depth / NA10851 read depth)

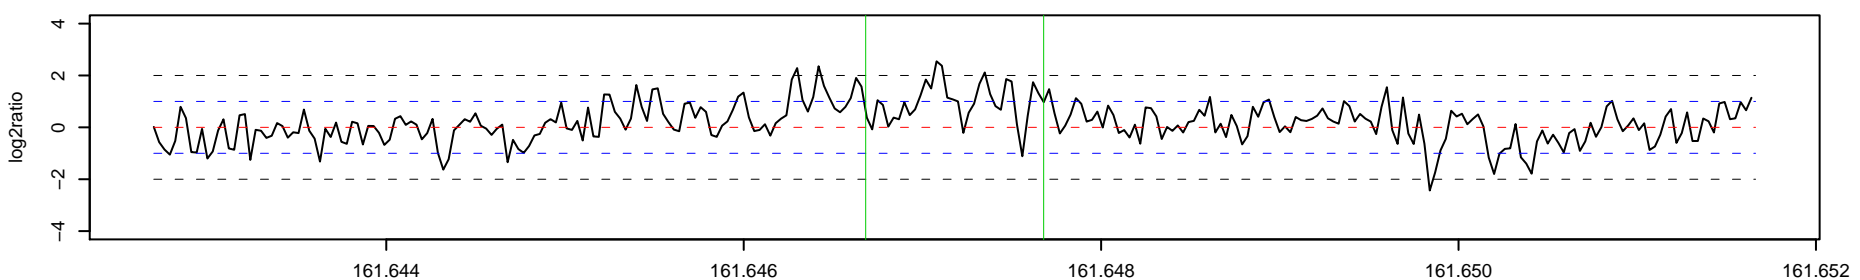

293 \_ AK1 Chr 6 : 162657978 – 162660231 , 2254 bp (aCGH relative log2ratio= -0.79 )

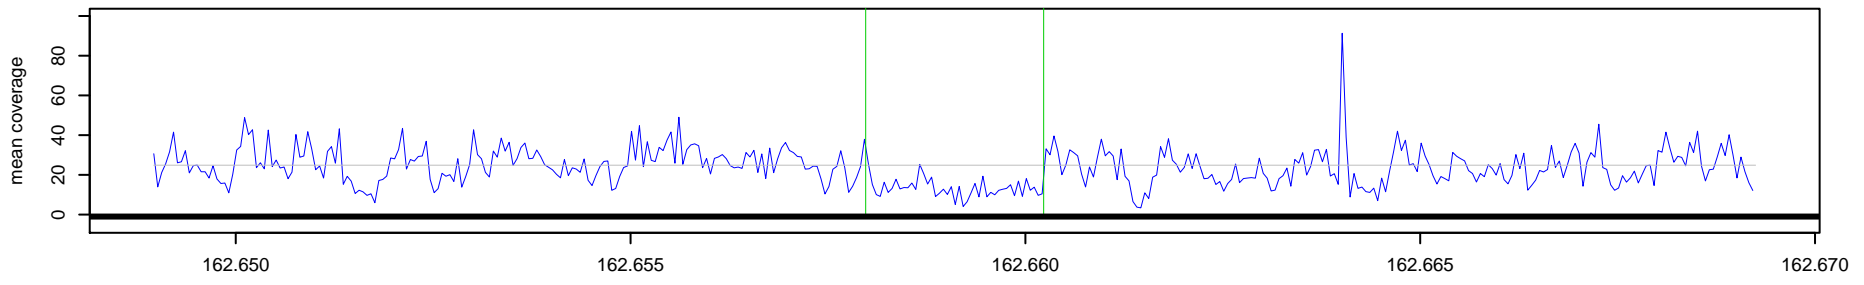

293 \_ NA10851 Chr 6 : 162657978 – 162660231 , 2254 bp (aCGH relative log2ratio= -0.79 )

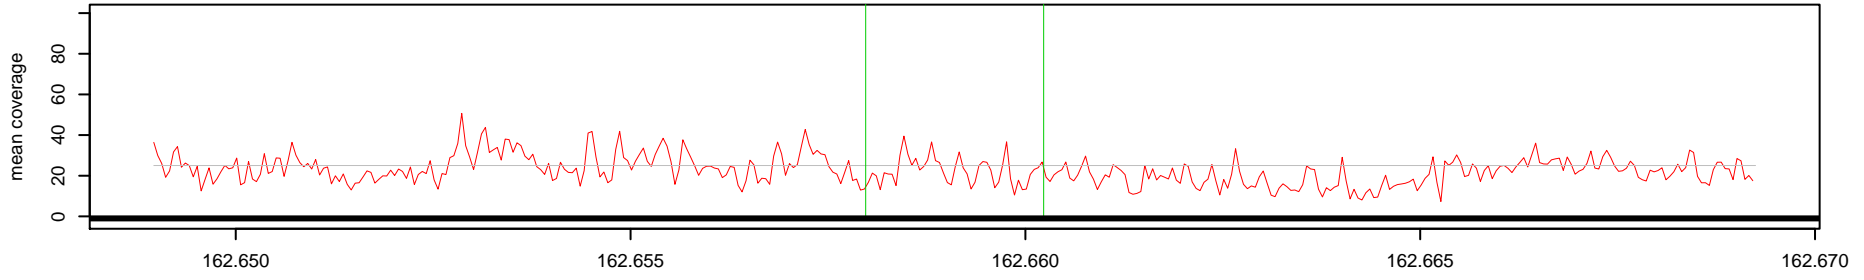

Log2( AK1 read depth / NA10851 read depth)

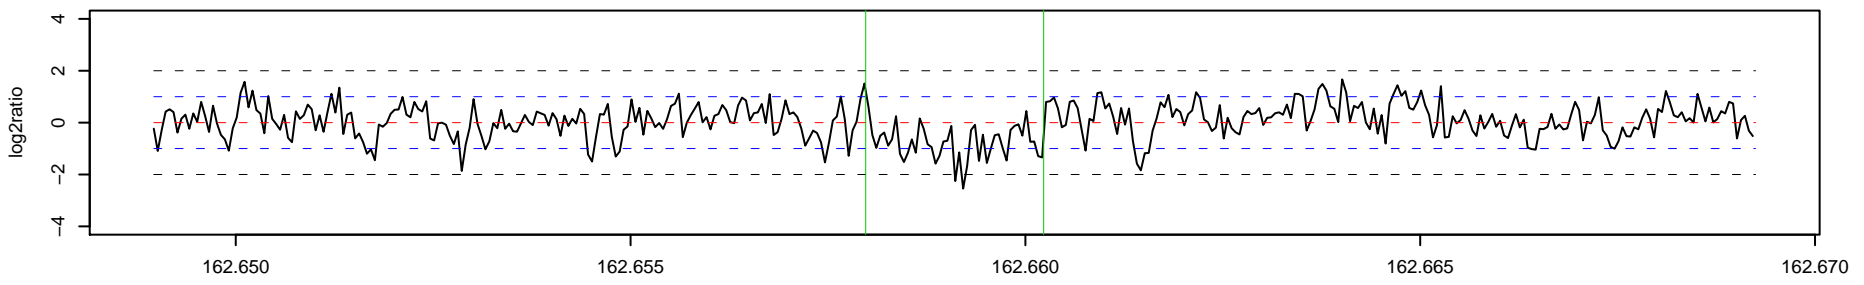

o

o

294 \_ AK1 Chr 6 : 164464364 – 164466389 , 2026 bp (aCGH relative log2ratio= -0.86 )

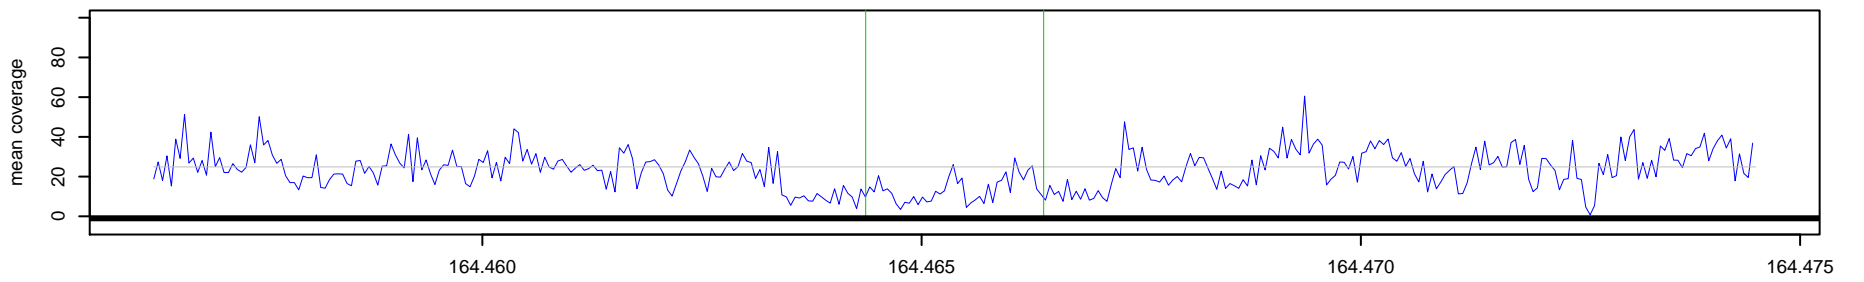

294 \_ NA10851 Chr 6 : 164464364 – 164466389 , 2026 bp (aCGH relative log2ratio= -0.86 )

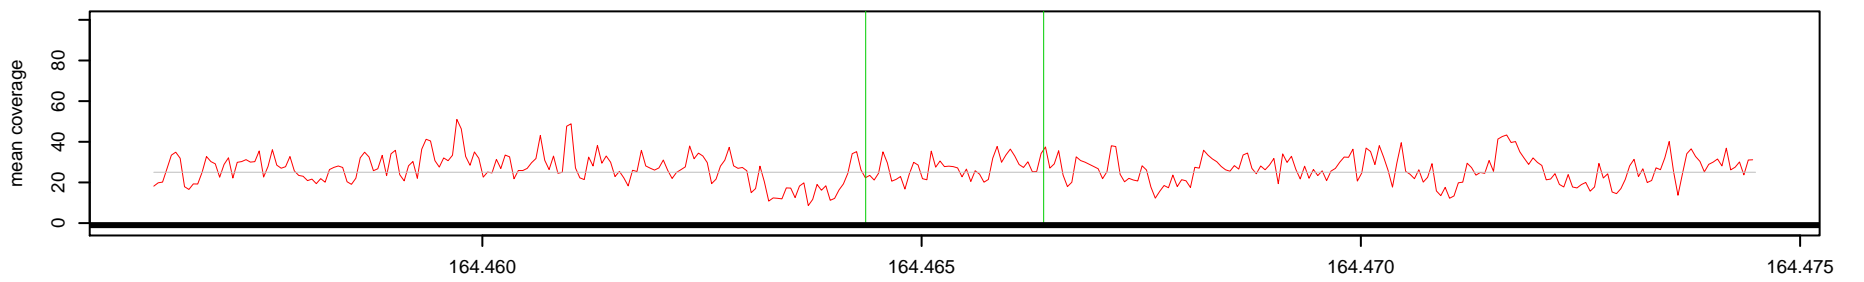

Log2( AK1 read depth / NA10851 read depth)

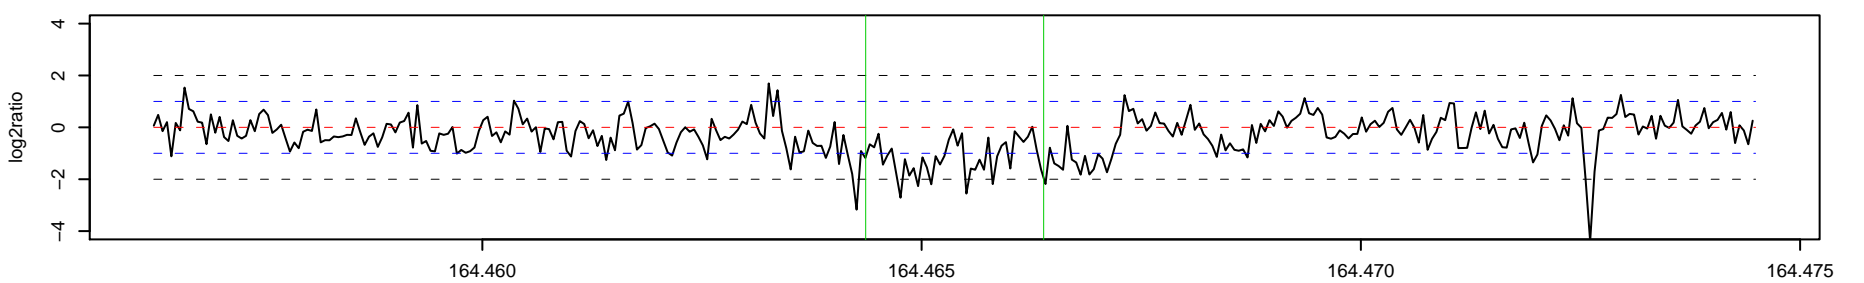

164.460

164.465

164.470

164.475

295\_AK1 Chr 7 : 3576908 – 3584334 , 7427 bp (aCGH relative log2ratio= 0.68 )

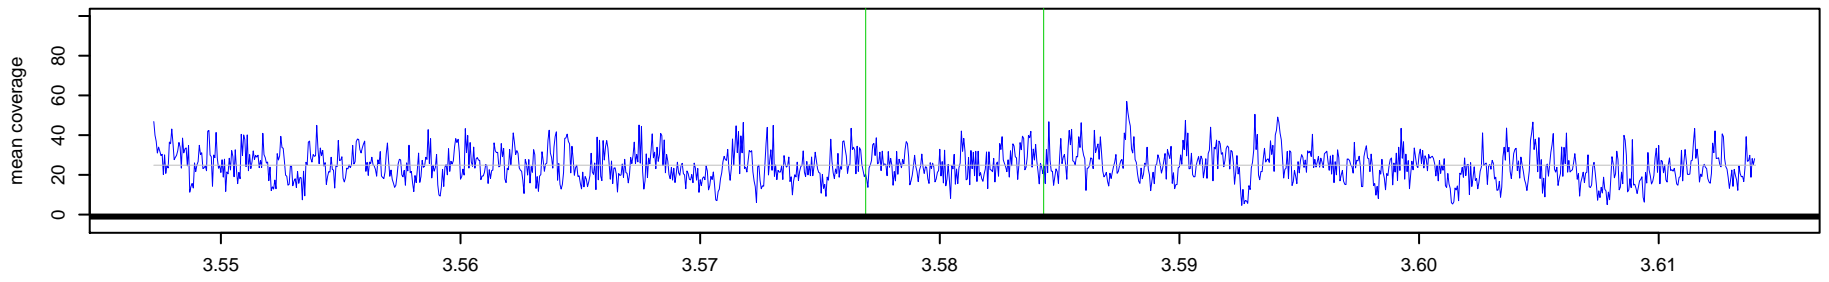

295\_NA10851 Chr 7 : 3576908 – 3584334 , 7427 bp (aCGH relative log2ratio= 0.68 )

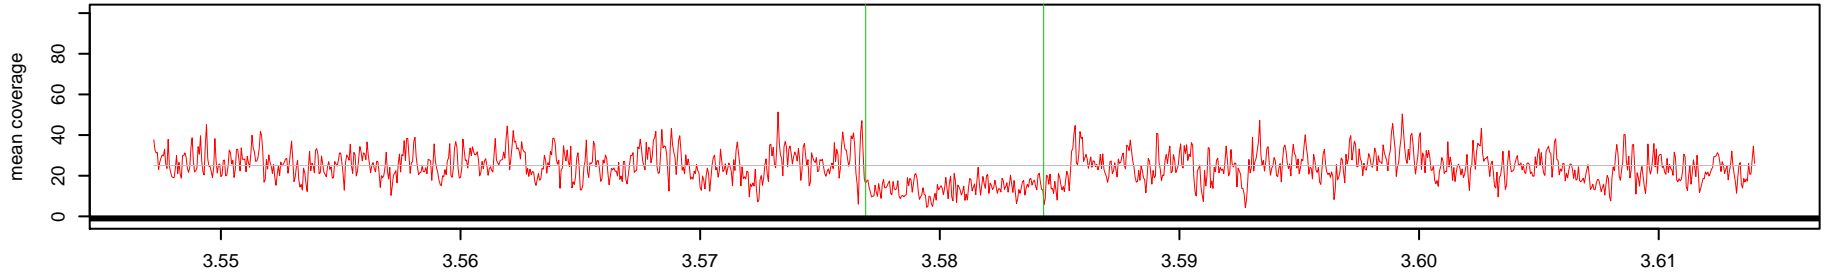

Log2( AK1 read depth / NA10851 read depth)

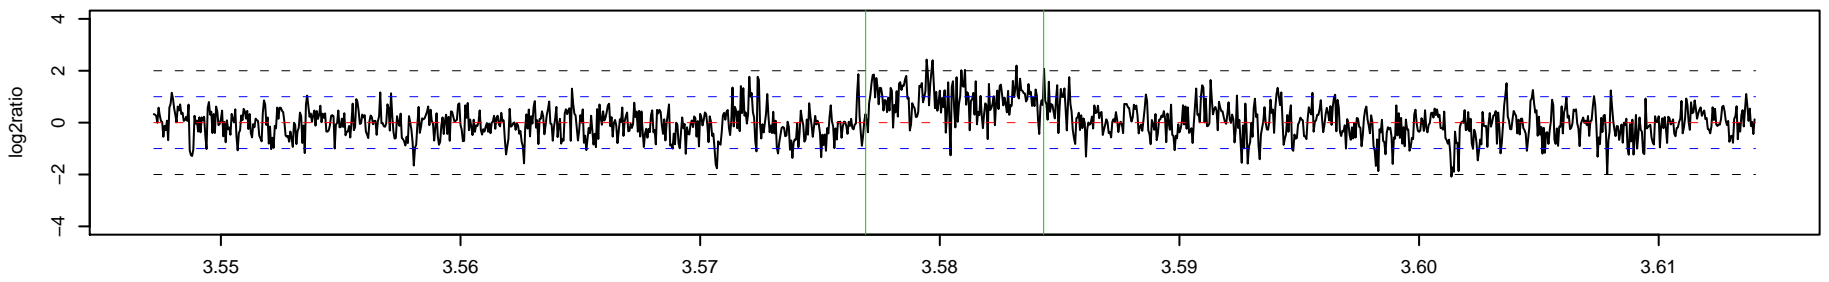

296\_AK1 Chr 7 : 3717153 – 3717591 , 439 bp (aCGH relative log2ratio= 0.51 )

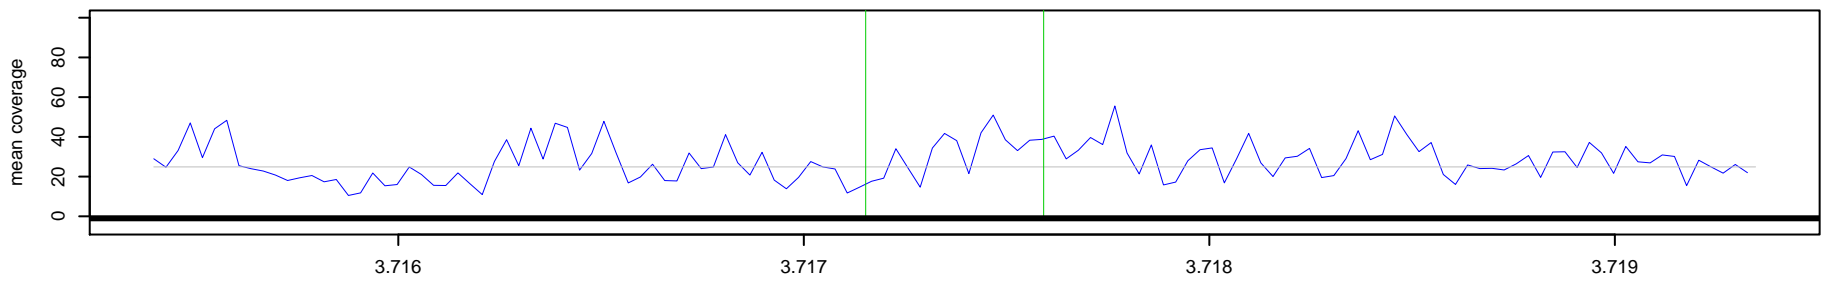

296\_NA10851 Chr 7 : 3717153 – 3717591 , 439 bp (aCGH relative log2ratio= 0.51 )

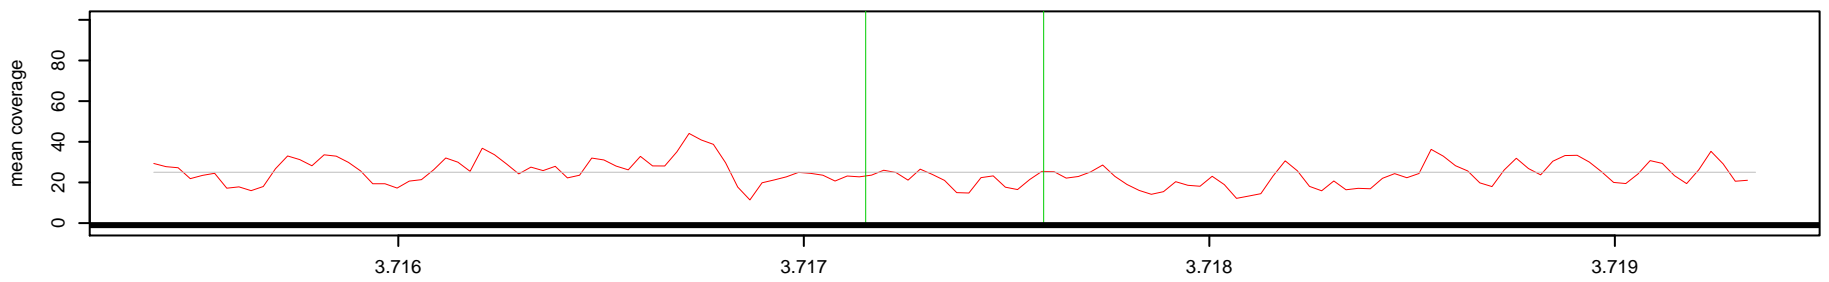

Log2( AK1 read depth / NA10851 read depth)

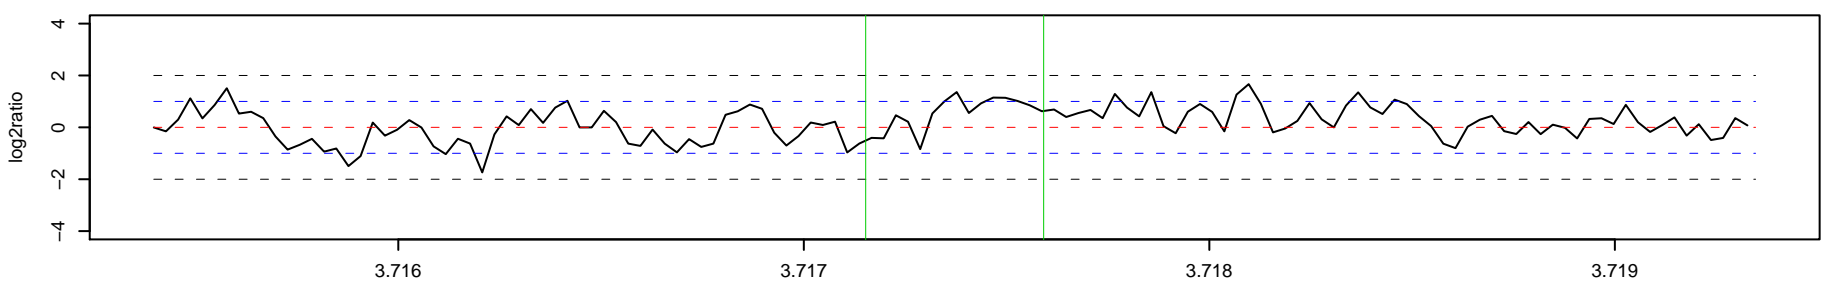



297\_AK1 Chr 7 : 4125446 – 4126910 , 1465 bp (aCGH relative log2ratio= 0.90 )

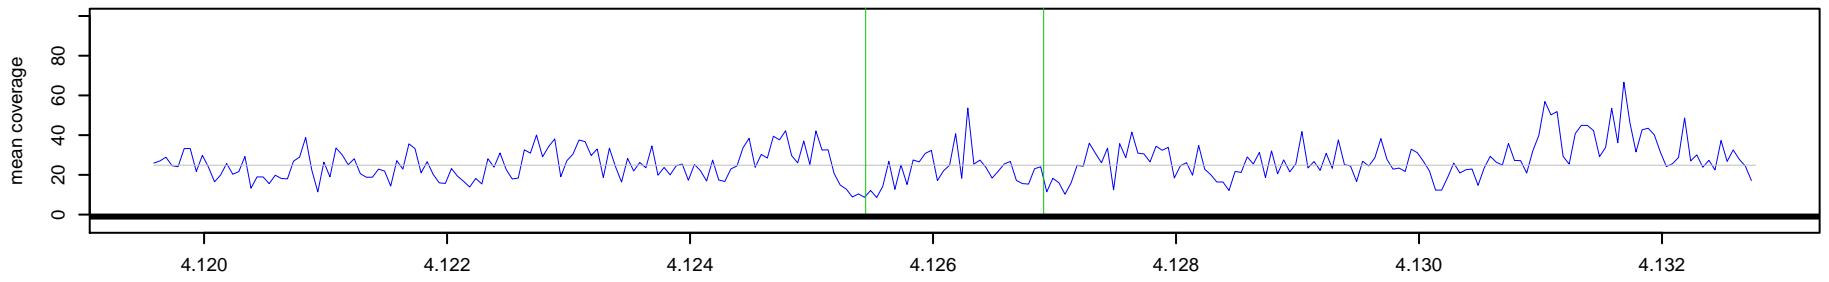

297\_NA10851 Chr 7 : 4125446 – 4126910 , 1465 bp (aCGH relative log2ratio= 0.90 )

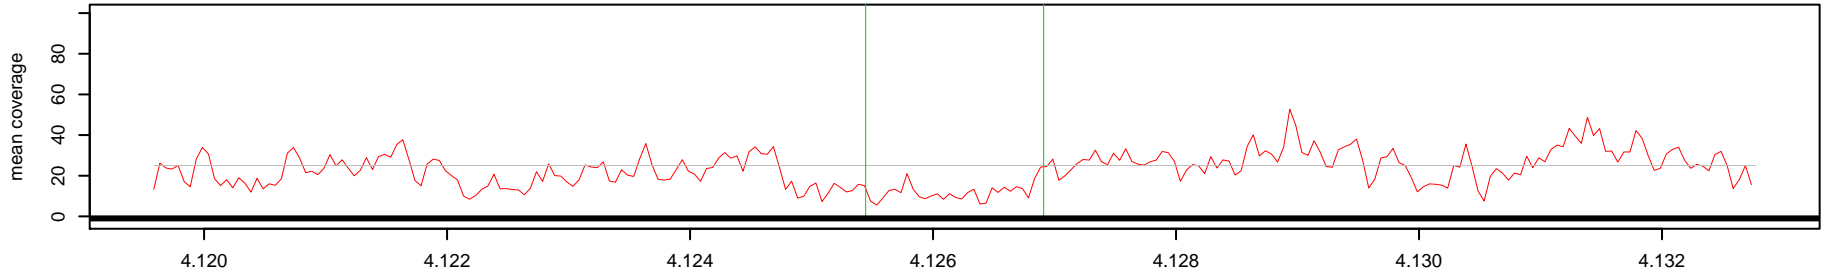

Log2( AK1 read depth / NA10851 read depth)

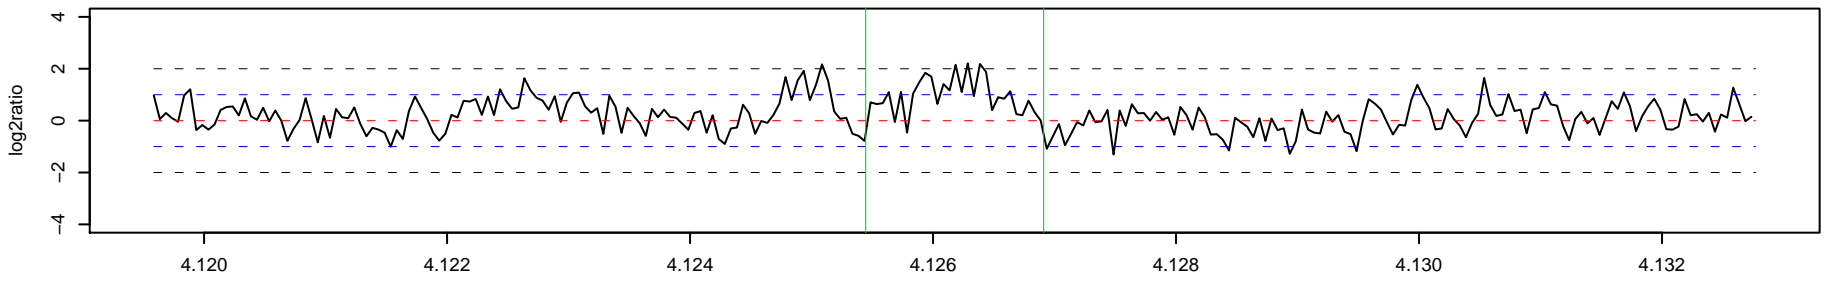

298\_AK1 Chr 7 : 13244566 – 13247154 , 2589 bp (aCGH relative log2ratio= 1.00 )

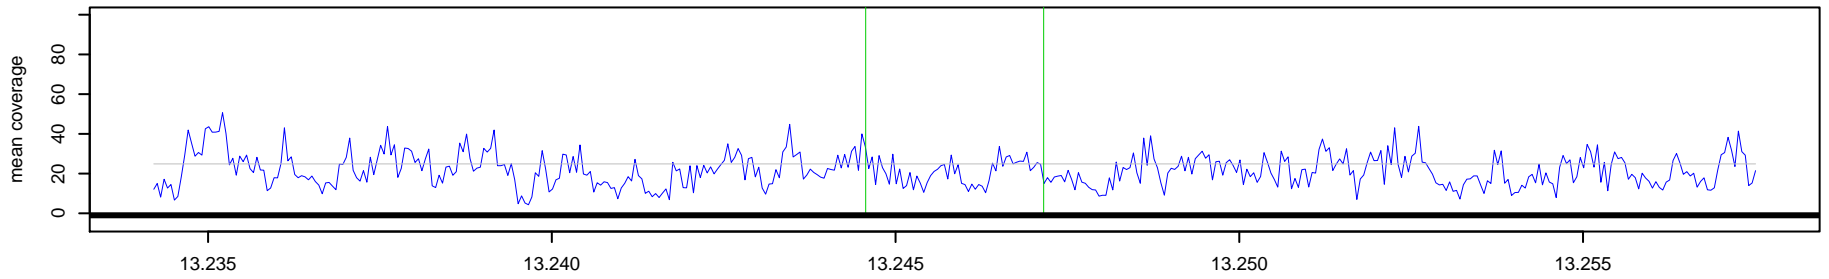

298\_NA10851 Chr 7 : 13244566 – 13247154 , 2589 bp (aCGH relative log2ratio= 1.00 )

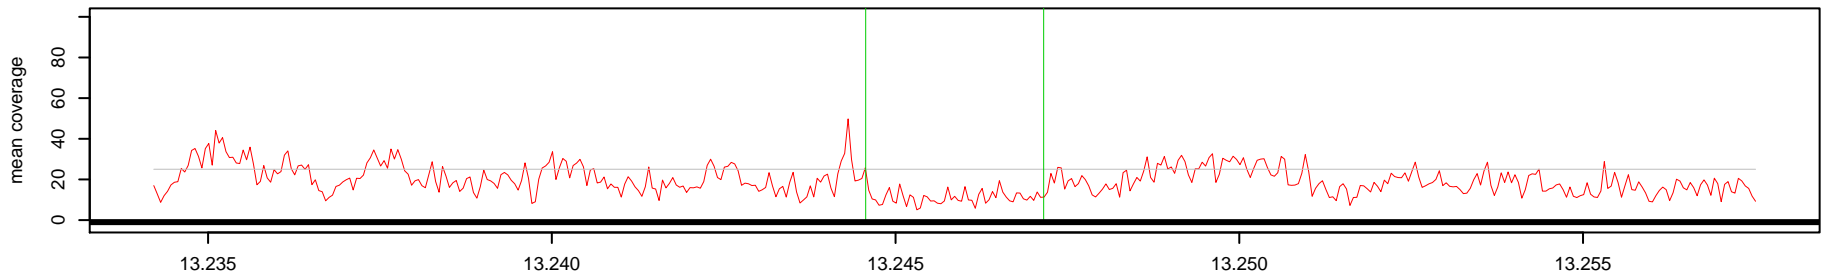

Log2( AK1 read depth / NA10851 read depth)

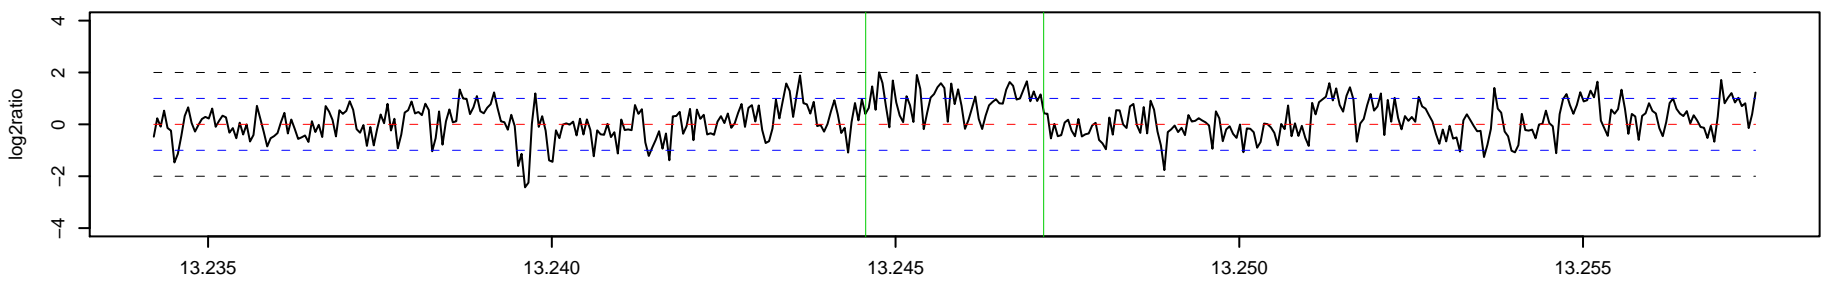

299\_AK1 Chr 7 : 16138302 – 16140218 , 1917 bp (aCGH relative log2ratio= -4.09 )

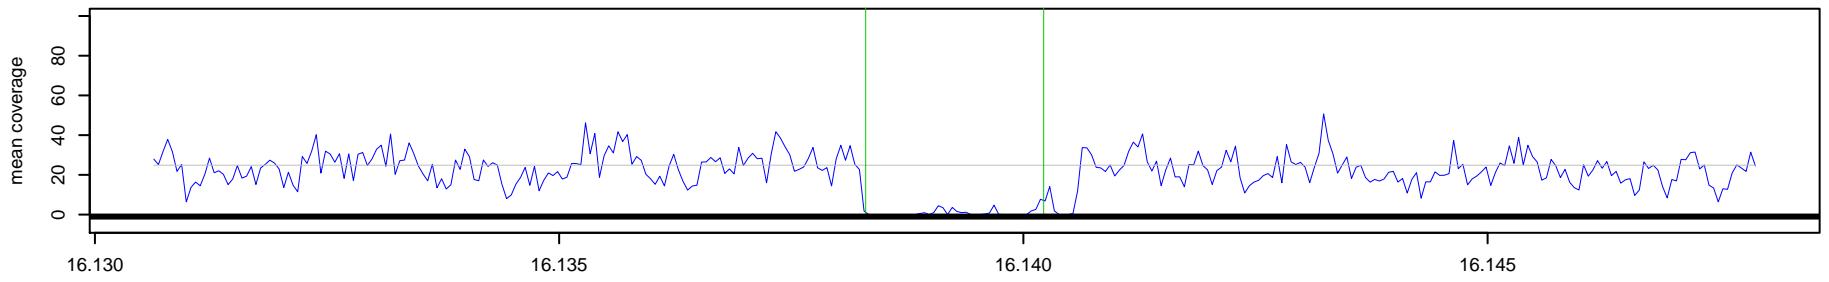

299\_NA10851 Chr 7 : 16138302 – 16140218 , 1917 bp (aCGH relative log2ratio= -4.09 )

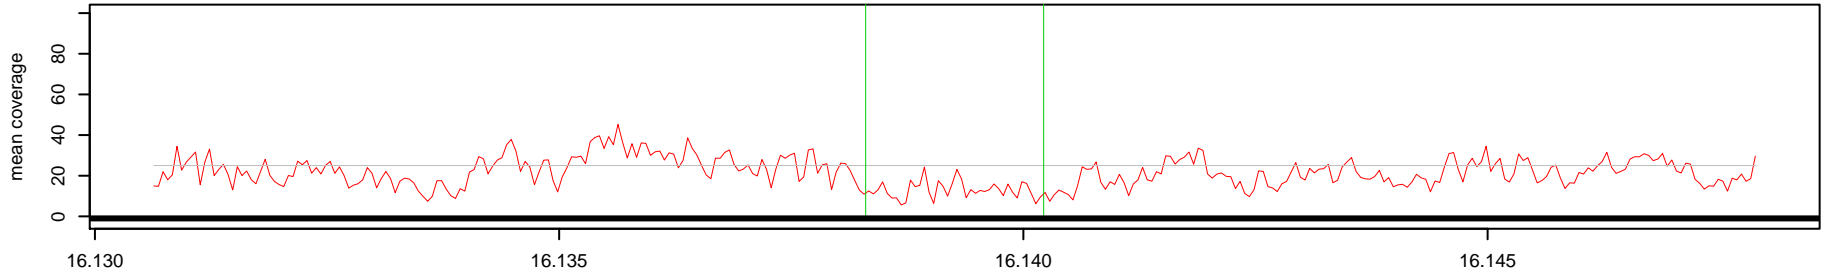

Log2( AK1 read depth / NA10851 read depth)

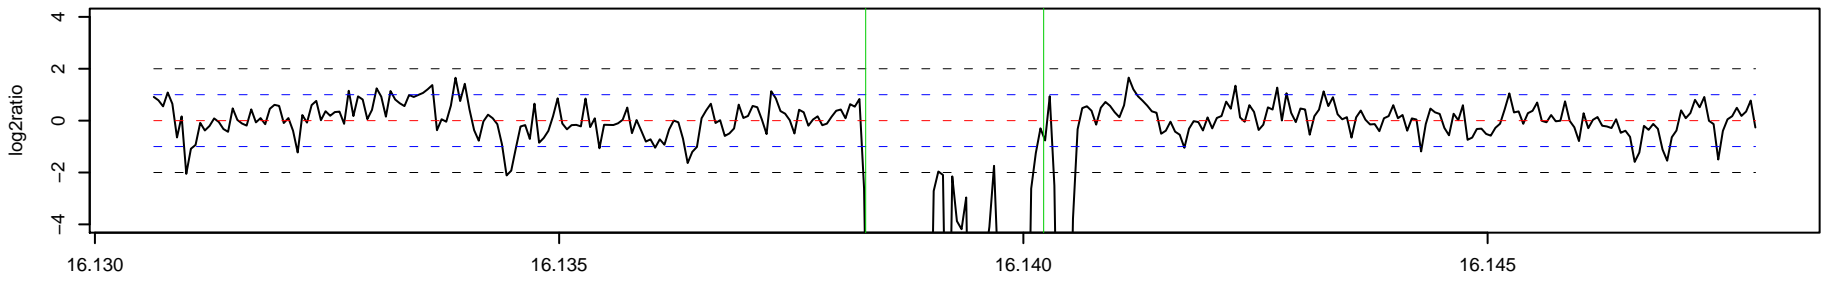

300\_AK1 Chr 7 : 19009836 – 19010361 , 526 bp (aCGH relative log2ratio= 0.52 )

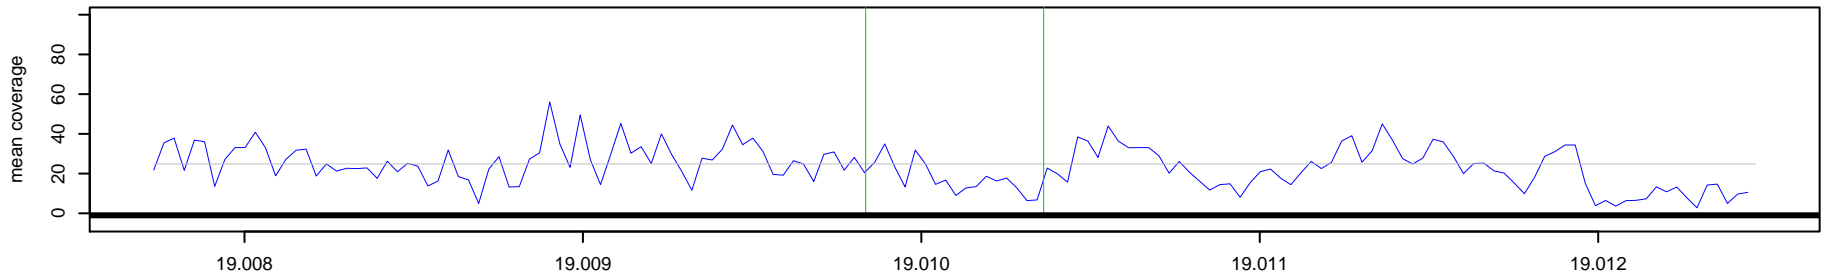

300\_NA10851 Chr 7 : 19009836 – 19010361 , 526 bp (aCGH relative log2ratio= 0.52 )

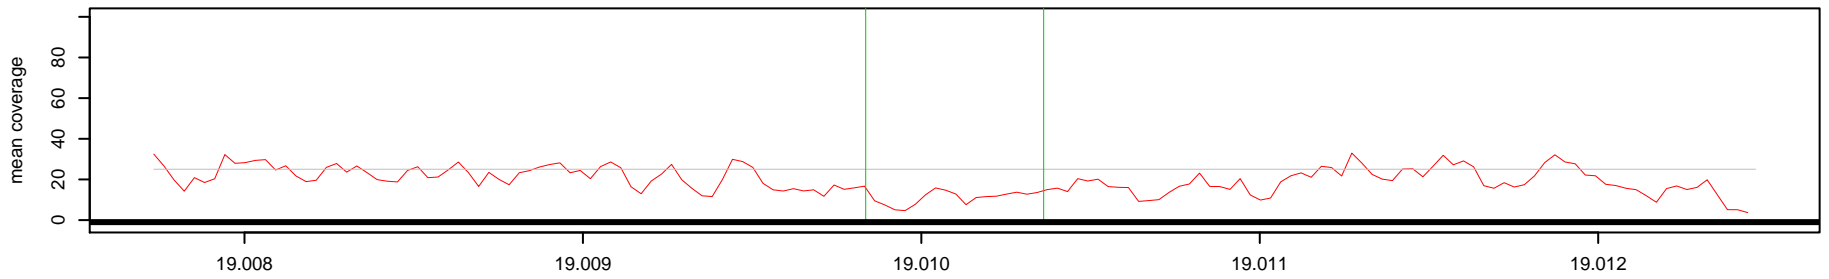

Log2( AK1 read depth / NA10851 read depth)

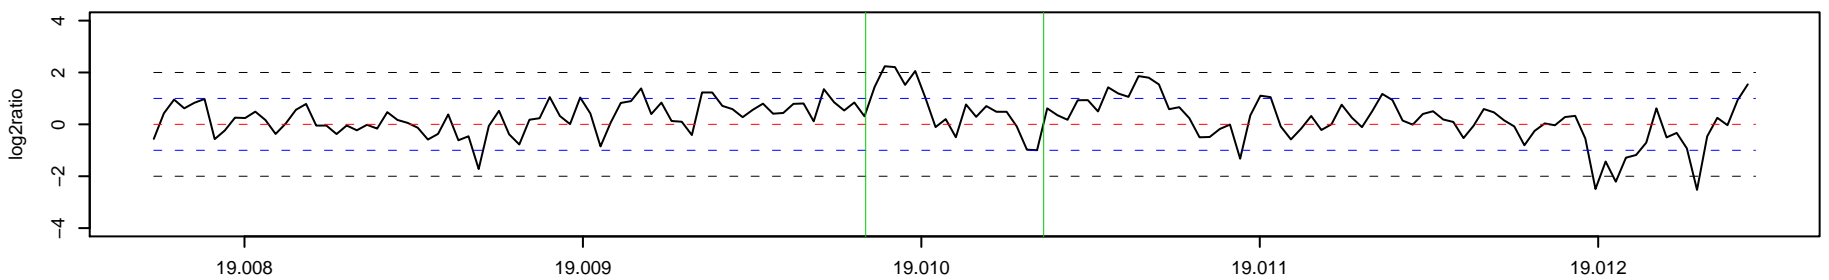

301\_AK1 Chr 7 : 24004730 – 24005862 , 1133 bp (aCGH relative log2ratio= -2.75 )

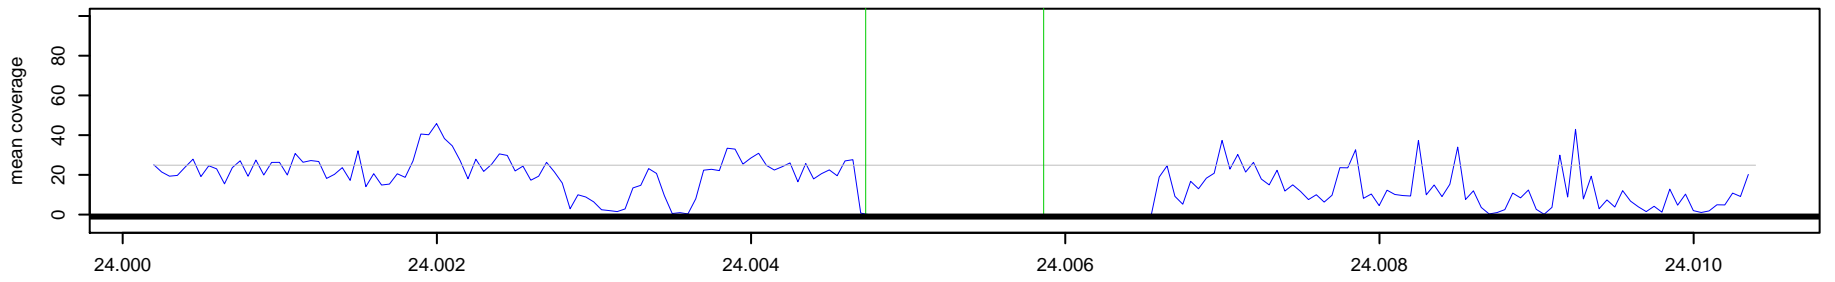

301\_NA10851 Chr 7 : 24004730 – 24005862 , 1133 bp (aCGH relative log2ratio= -2.75 )

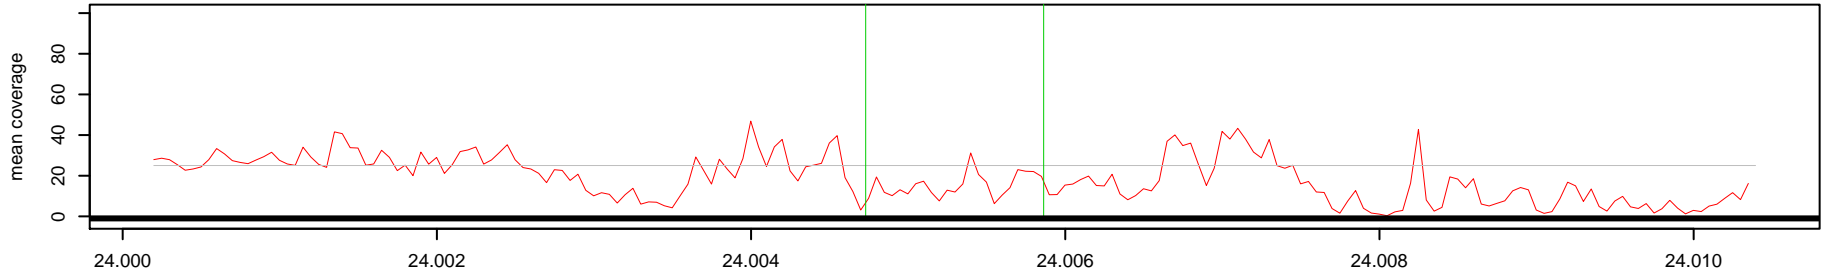

Log2( AK1 read depth / NA10851 read depth)

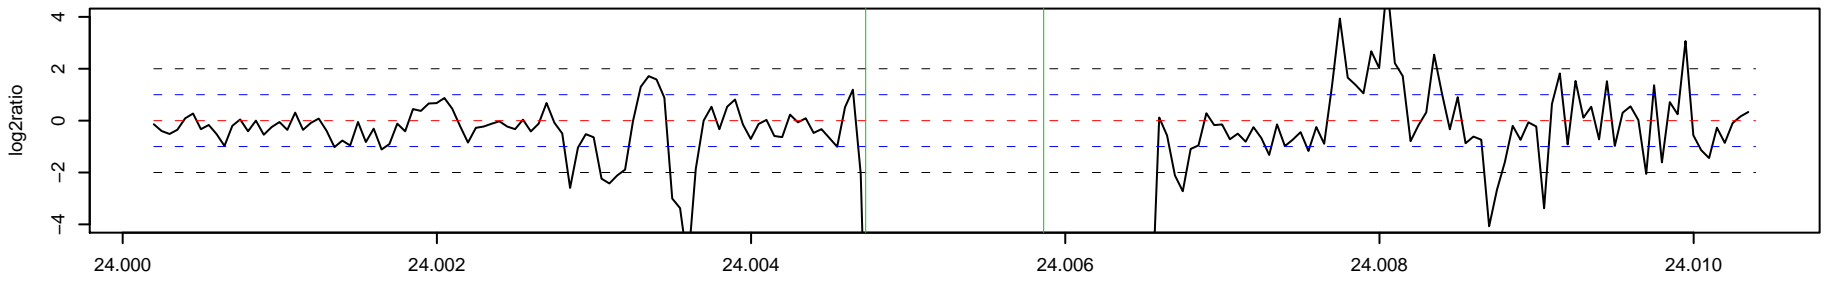

302\_AK1 Chr 7 : 26103636 – 26112125 , 8490 bp (aCGH relative log2ratio= 0.59 )

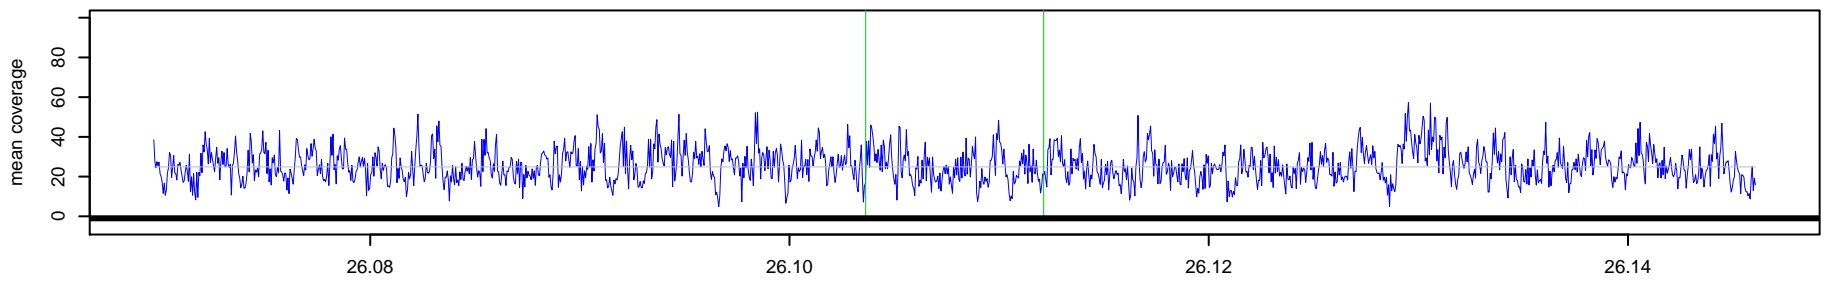

302\_NA10851 Chr 7 : 26103636 – 26112125 , 8490 bp (aCGH relative log2ratio= 0.59 )

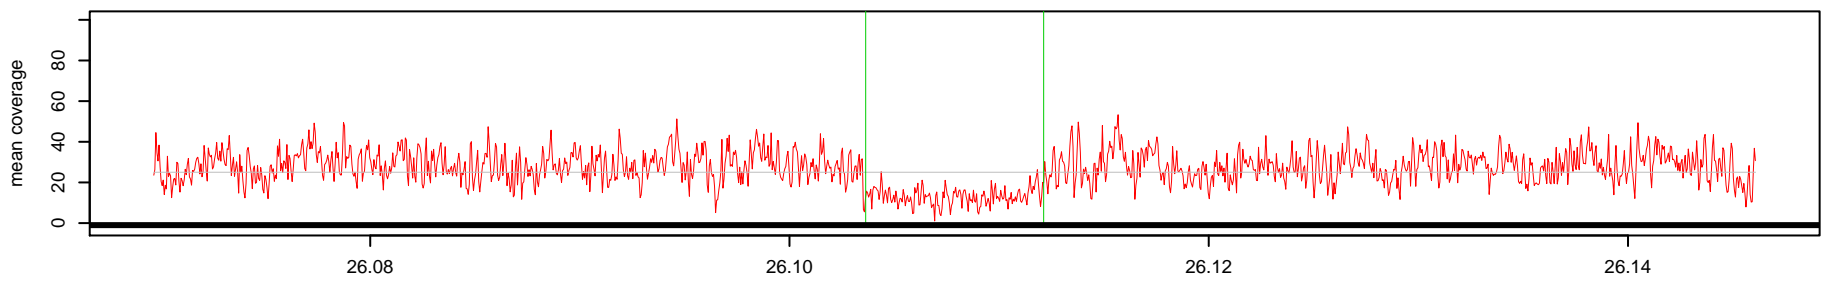

Log2( AK1 read depth / NA10851 read depth)

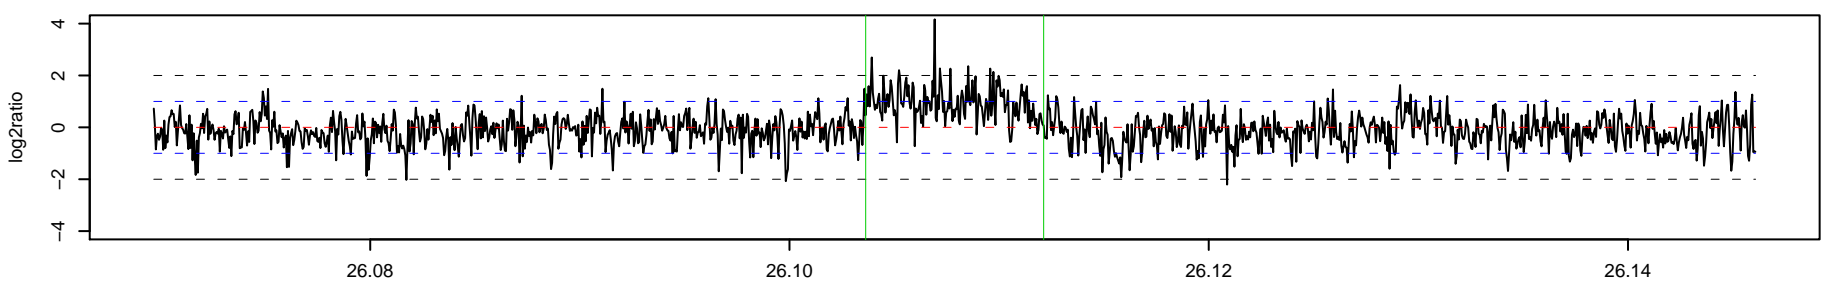

303\_AK1 Chr 7 : 31556780 – 31558529 , 1750 bp (aCGH relative log2ratio= -3.96 )

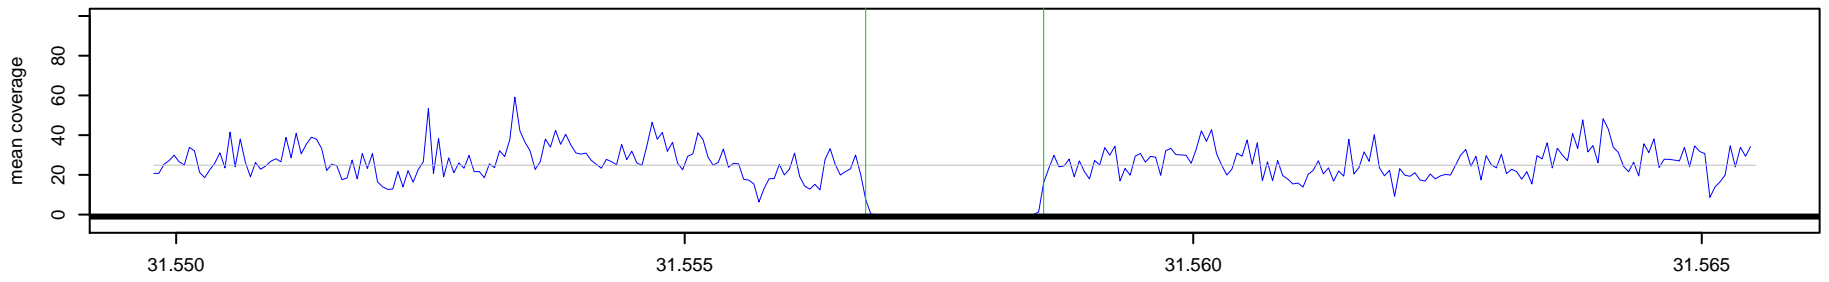

303\_NA10851 Chr 7 : 31556780 – 31558529 , 1750 bp (aCGH relative log2ratio= -3.96 )

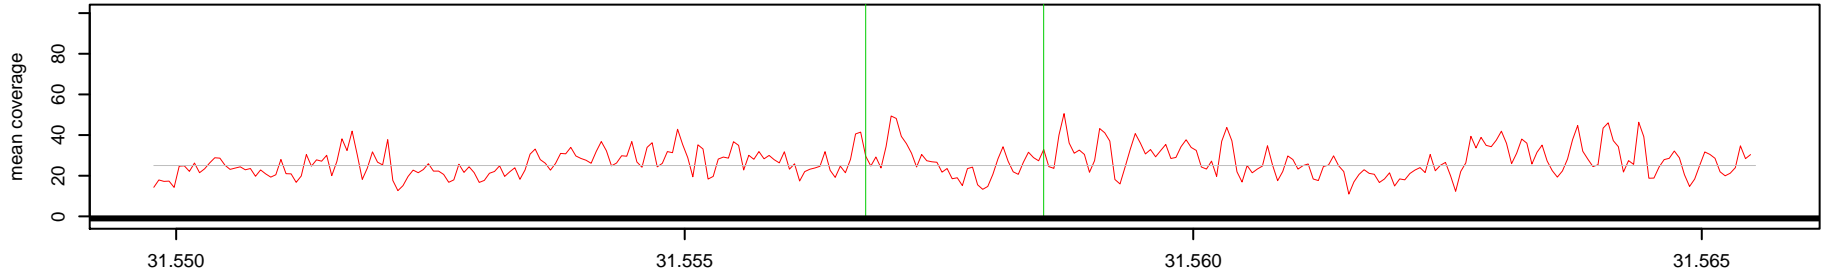

Log2( AK1 read depth / NA10851 read depth)

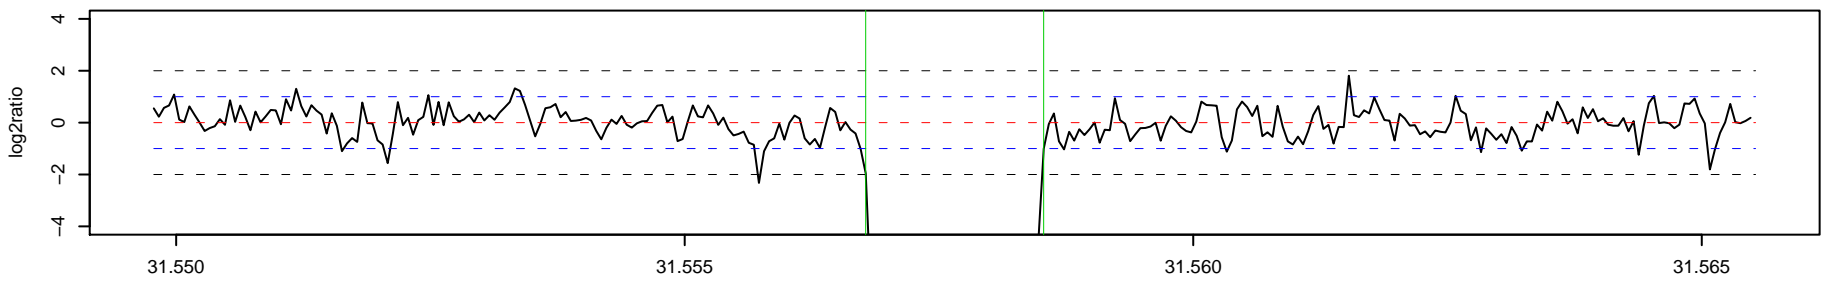

304\_AK1 Chr 7 : 33144305 – 33145863 , 1559 bp (aCGH relative log2ratio= -1.01 )

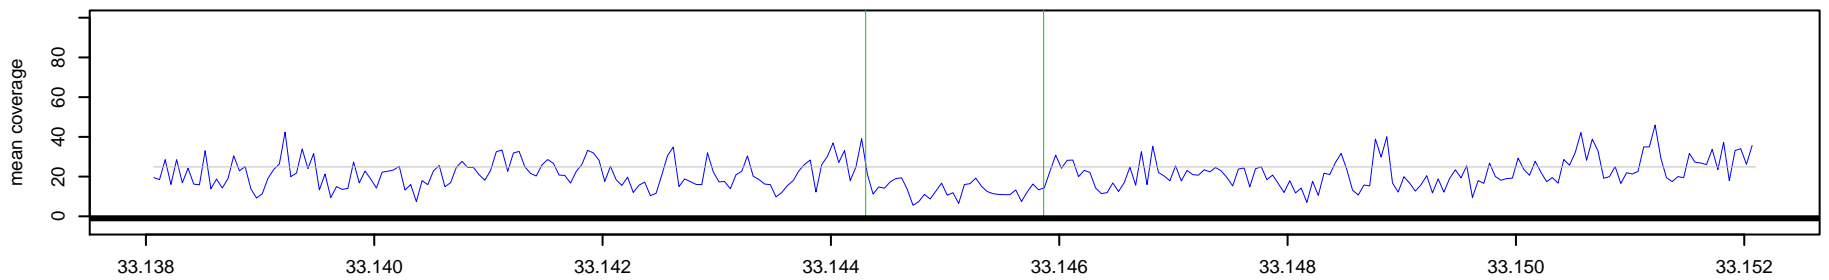

304\_NA10851 Chr 7 : 33144305 – 33145863 , 1559 bp (aCGH relative log2ratio= -1.01 )

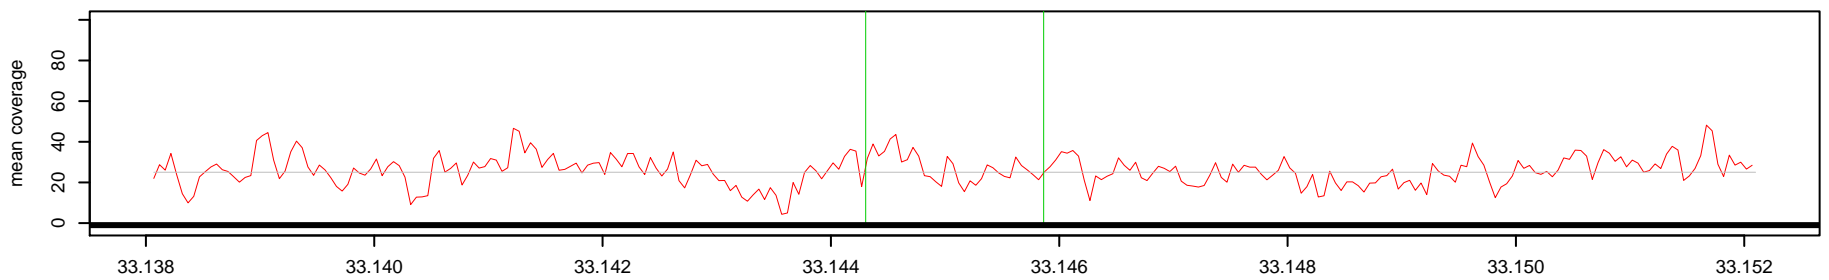

Log2( AK1 read depth / NA10851 read depth)

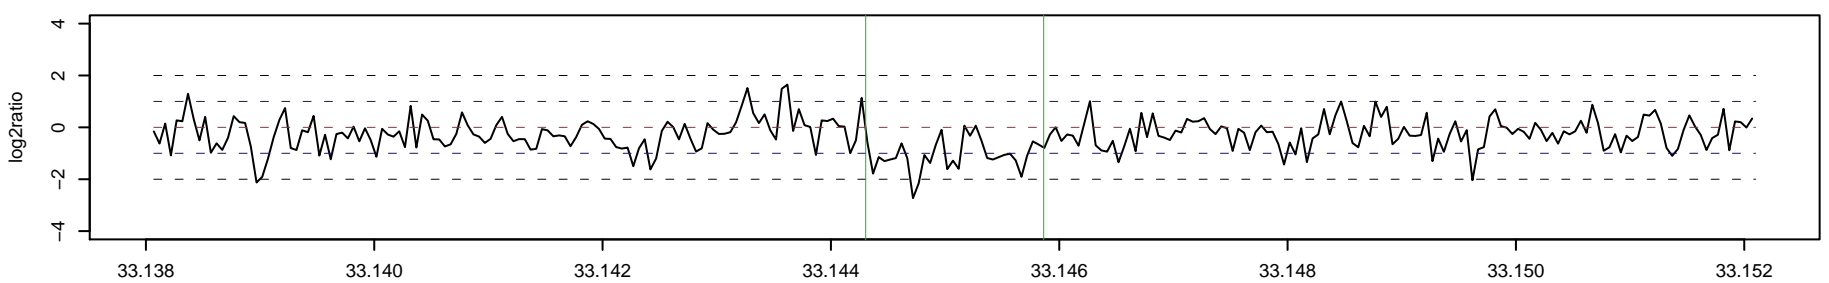

305\_AK1 Chr 7 : 34462045 – 34462684 , 640 bp (aCGH relative log2ratio= 0.83 )

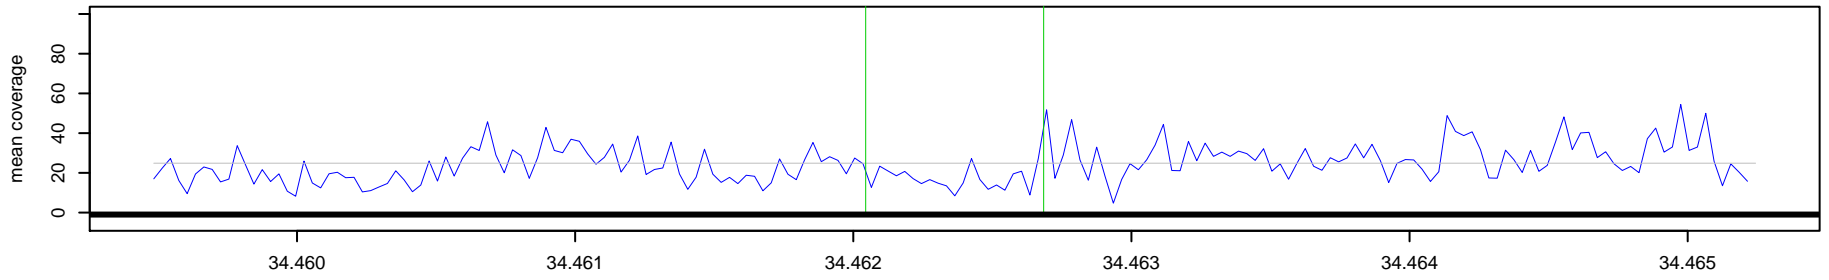

305\_NA10851 Chr 7 : 34462045 – 34462684 , 640 bp (aCGH relative log2ratio= 0.83 )

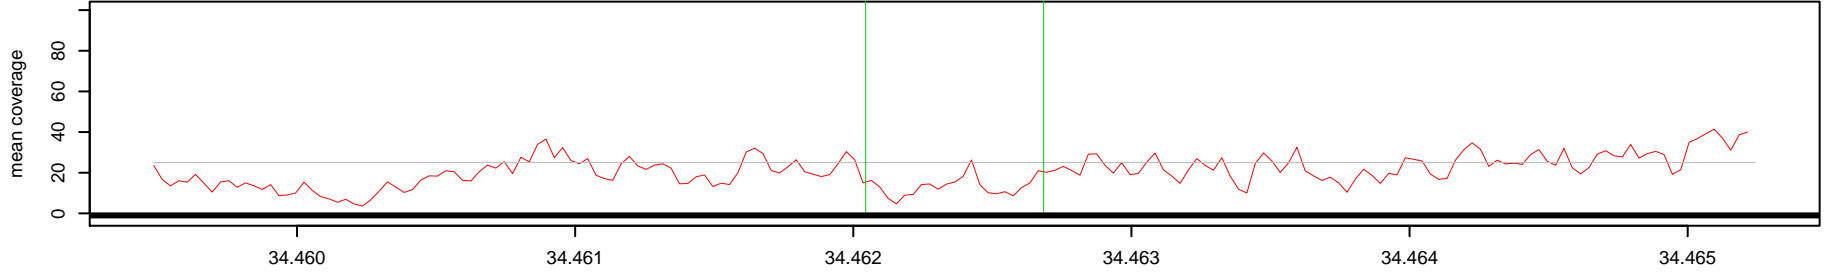

Log2( AK1 read depth / NA10851 read depth)

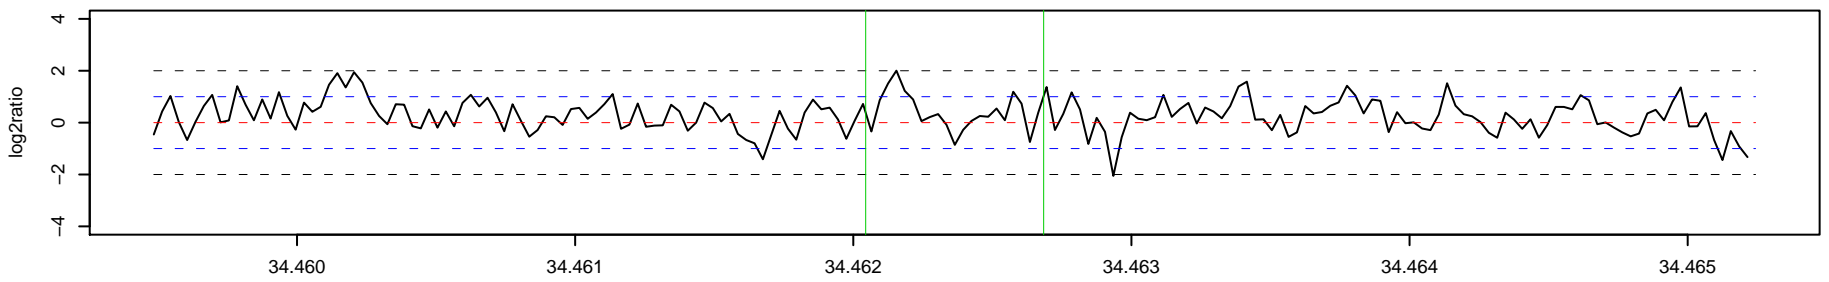

306\_AK1 Chr 7 : 38261424 – 38336664 , 75241 bp (aCGH relative log2ratio= -0.35 )

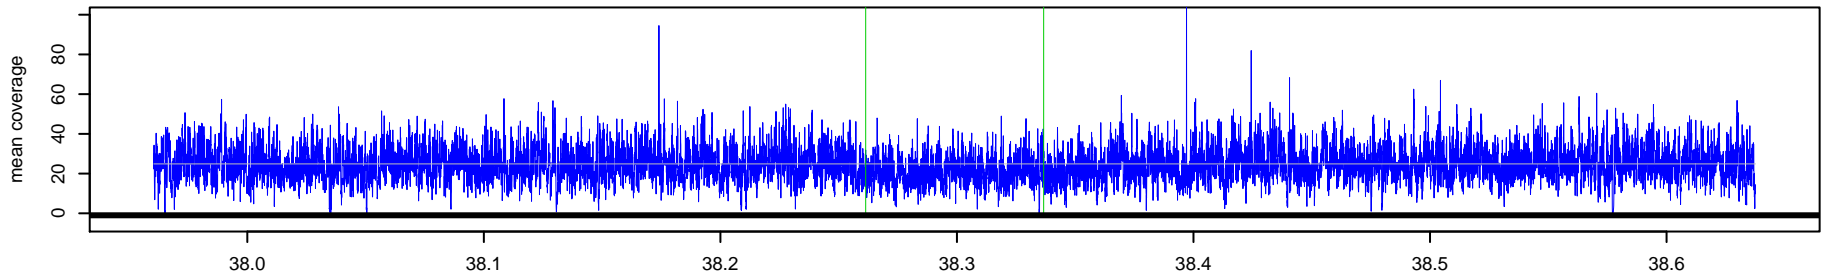

306\_NA10851 Chr 7 : 38261424 – 38336664 , 75241 bp (aCGH relative log2ratio= -0.35 )

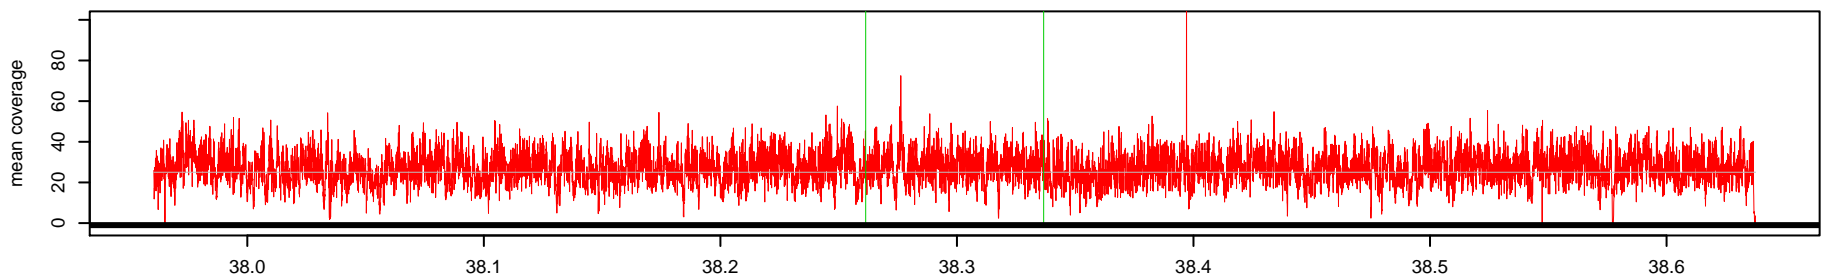

Log2( AK1 read depth / NA10851 read depth)

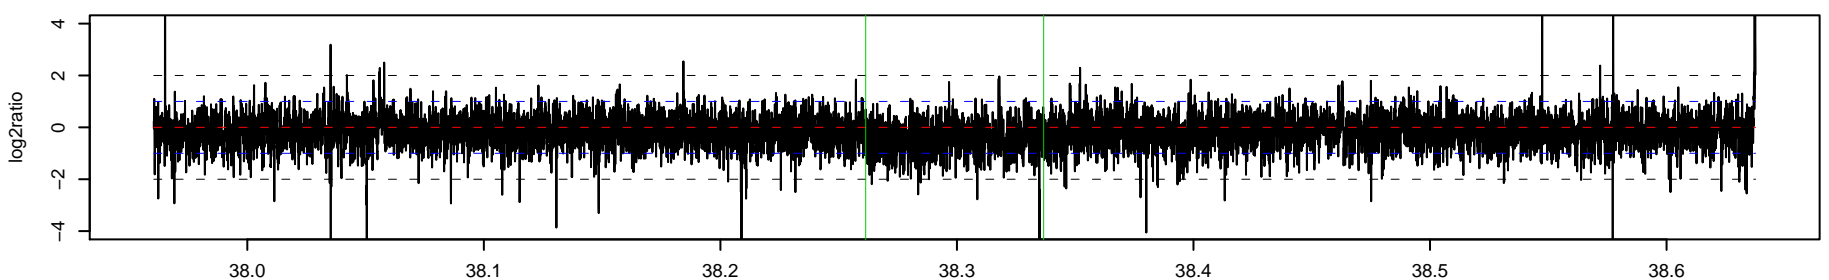

307\_AK1 Chr 7 : 39513585 – 39518391 , 4807 bp (aCGH relative log2ratio= 0.69 )

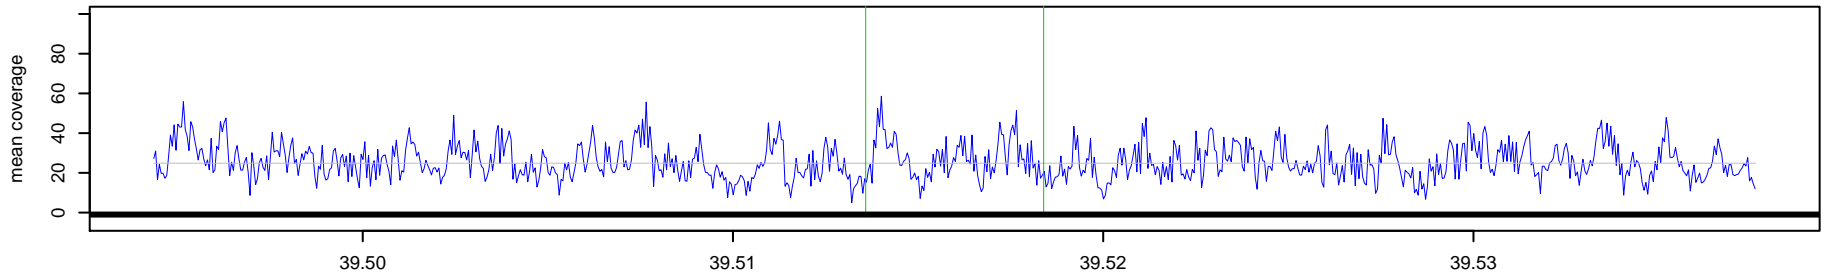

307\_NA10851 Chr 7 : 39513585 – 39518391 , 4807 bp (aCGH relative log2ratio= 0.69 )

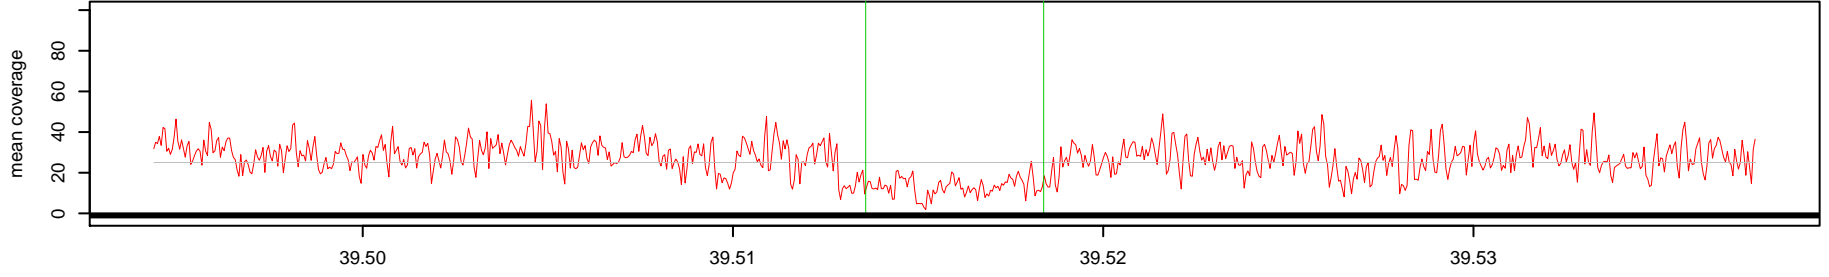

Log2( AK1 read depth / NA10851 read depth)

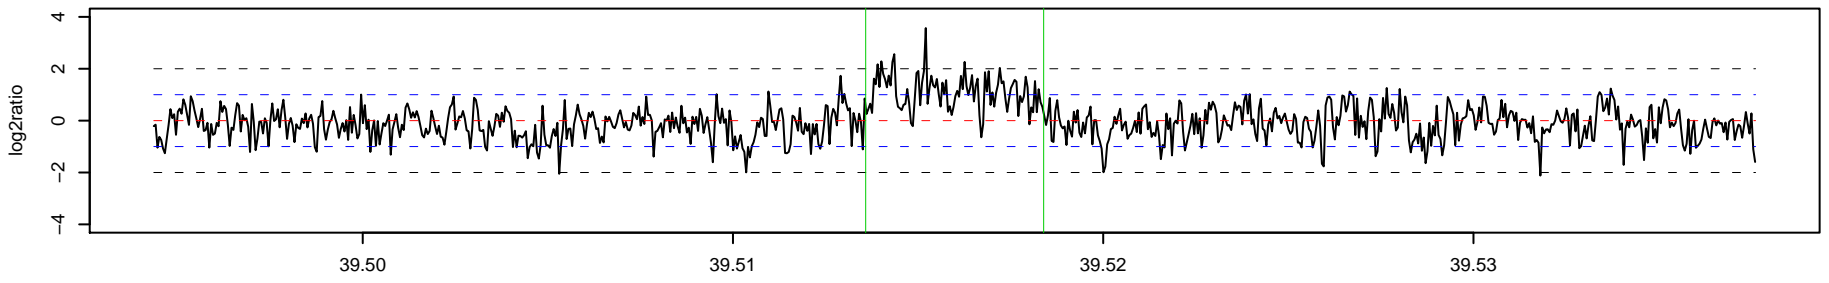

308\_AK1 Chr 7 : 51562649 – 51565871 , 3223 bp (aCGH relative log2ratio= -2.60 )

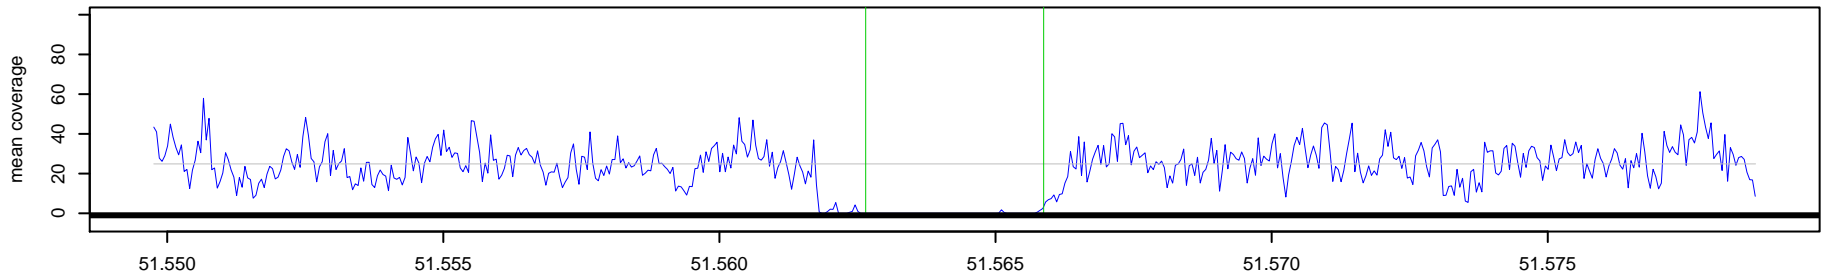

308\_NA10851 Chr 7 : 51562649 – 51565871 , 3223 bp (aCGH relative log2ratio= -2.60 )

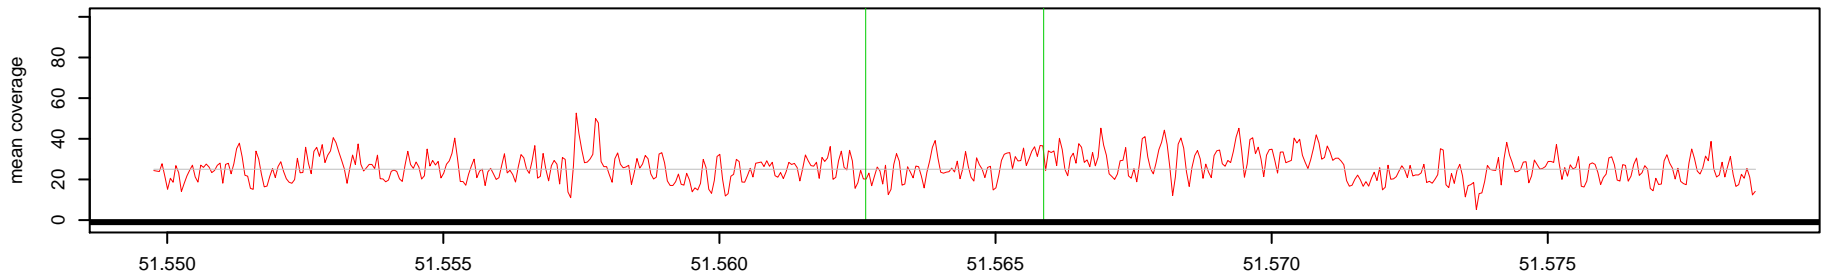

Log2( AK1 read depth / NA10851 read depth)

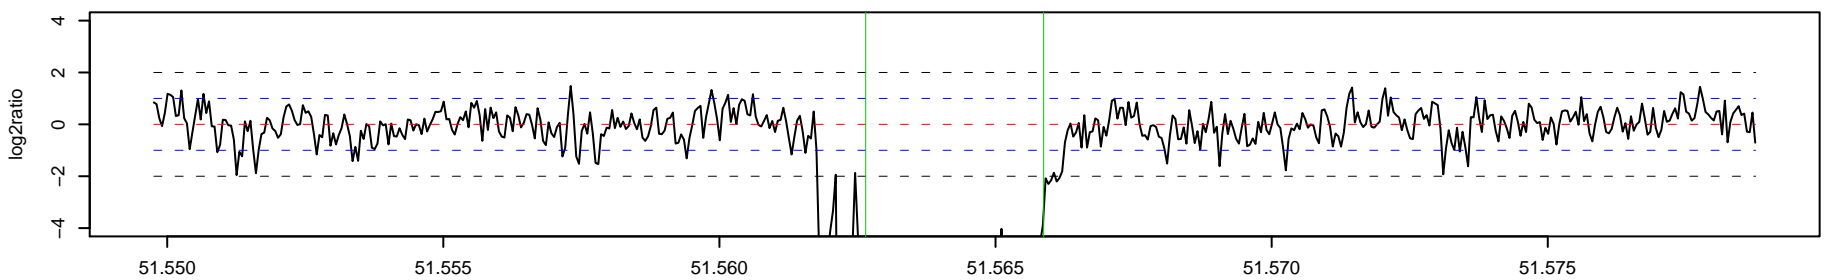

309\_AK1 Chr 7 : 52487642 – 52488426 , 785 bp (aCGH relative log2ratio= -0.63 )

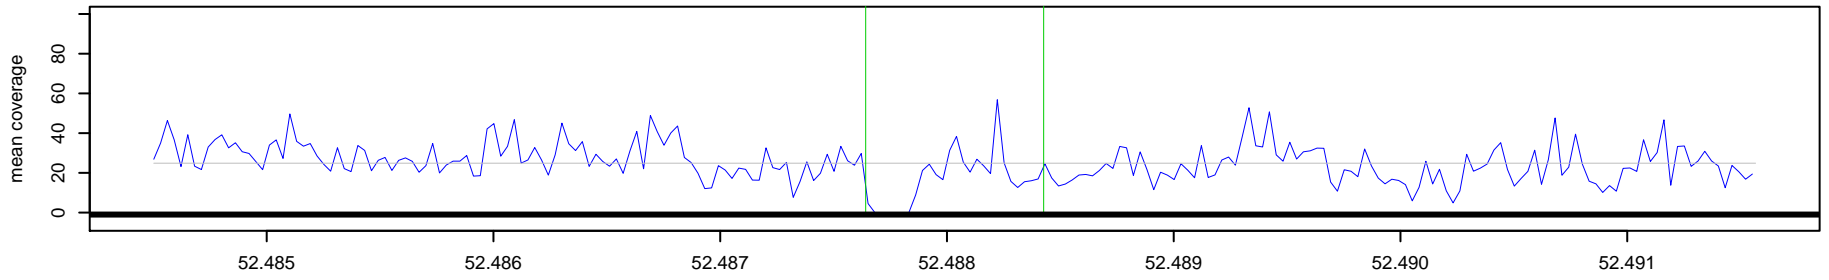

309\_NA10851 Chr 7 : 52487642 – 52488426 , 785 bp (aCGH relative log2ratio= -0.63 )

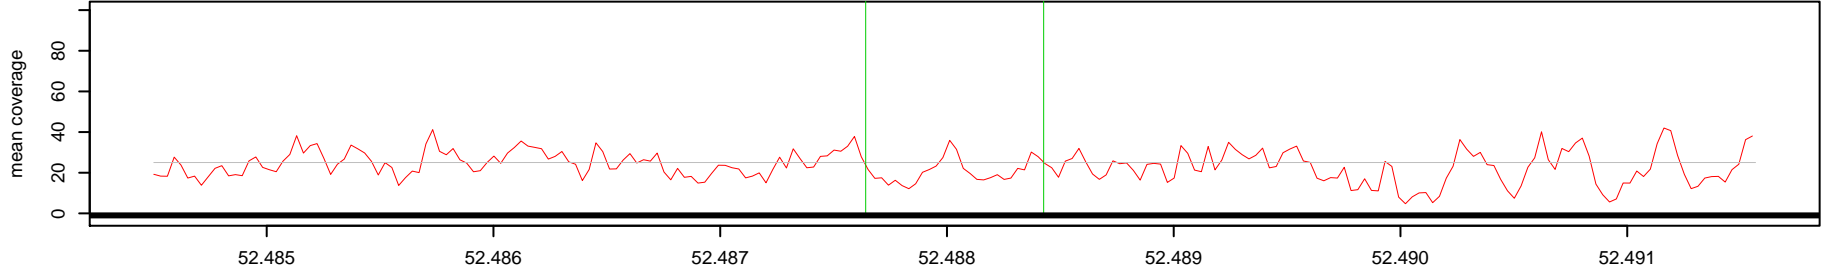

Log2( AK1 read depth / NA10851 read depth)

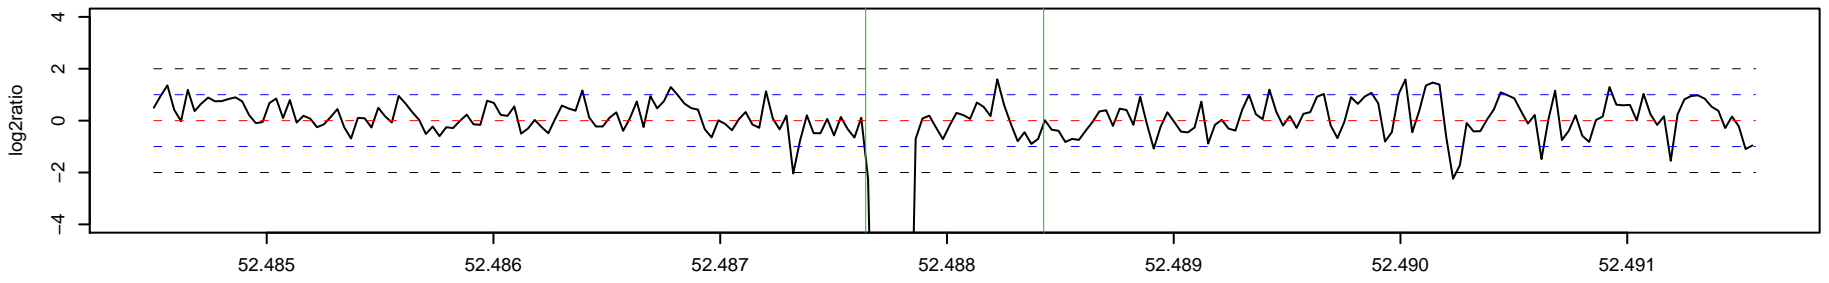

310\_AK1 Chr 7 : 52931664 – 52932407 , 744 bp (aCGH relative log2ratio= 0.91 )

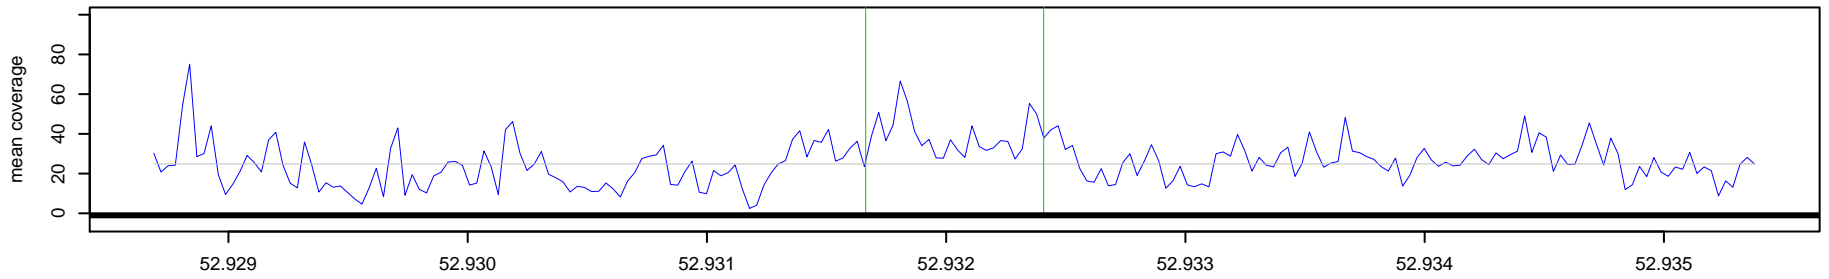

310\_NA10851 Chr 7 : 52931664 – 52932407 , 744 bp (aCGH relative log2ratio= 0.91 )

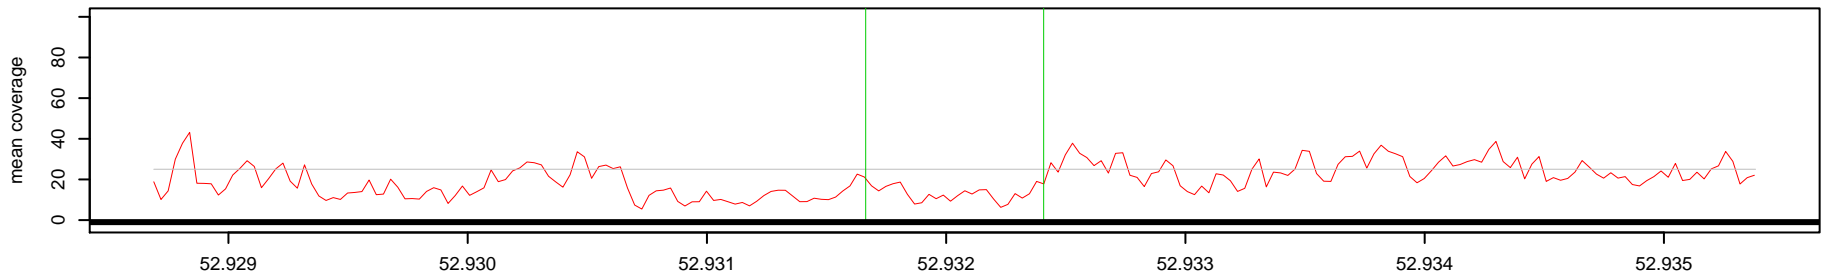

Log2( AK1 read depth / NA10851 read depth)

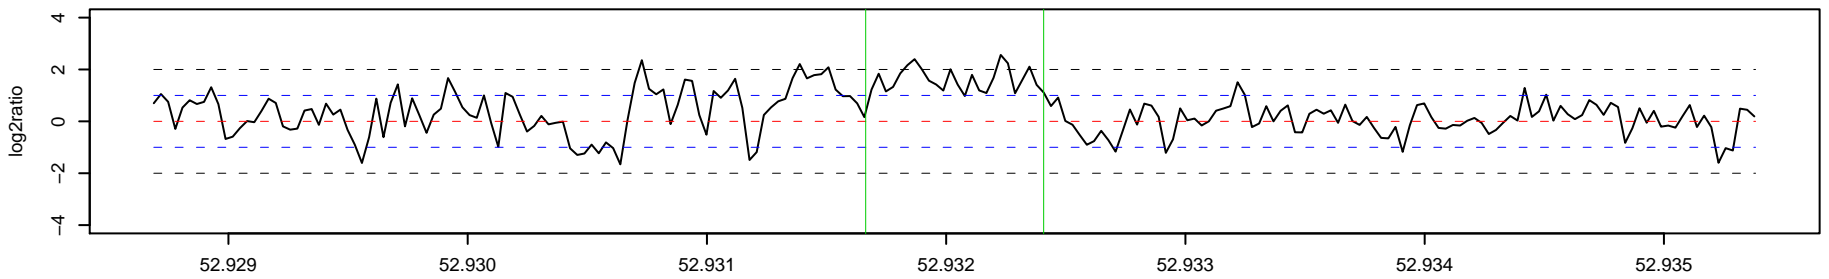

311 \_ AK1 Chr 7 : 54564234 – 54564875 , 642 bp (aCGH relative log2ratio= -5.06 )

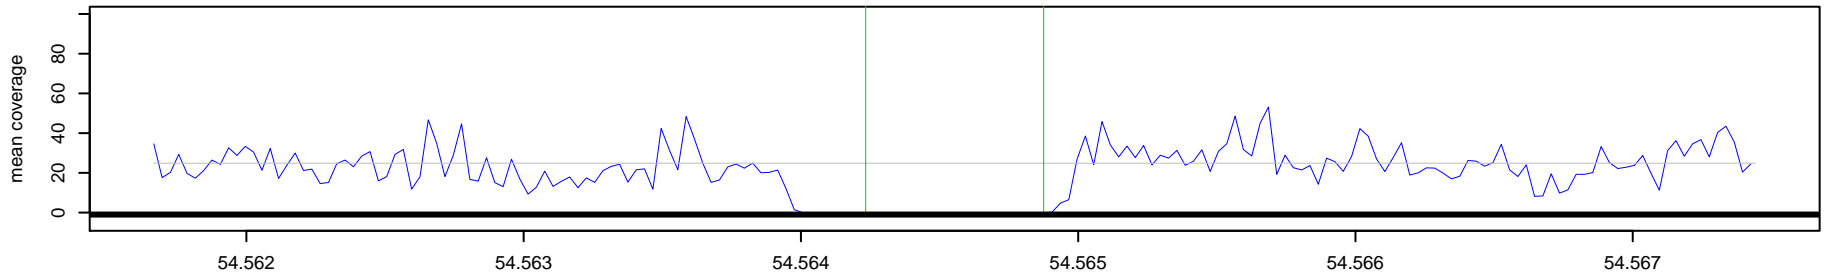

311 \_ NA10851 Chr 7 : 54564234 – 54564875 , 642 bp (aCGH relative log2ratio= -5.06 )

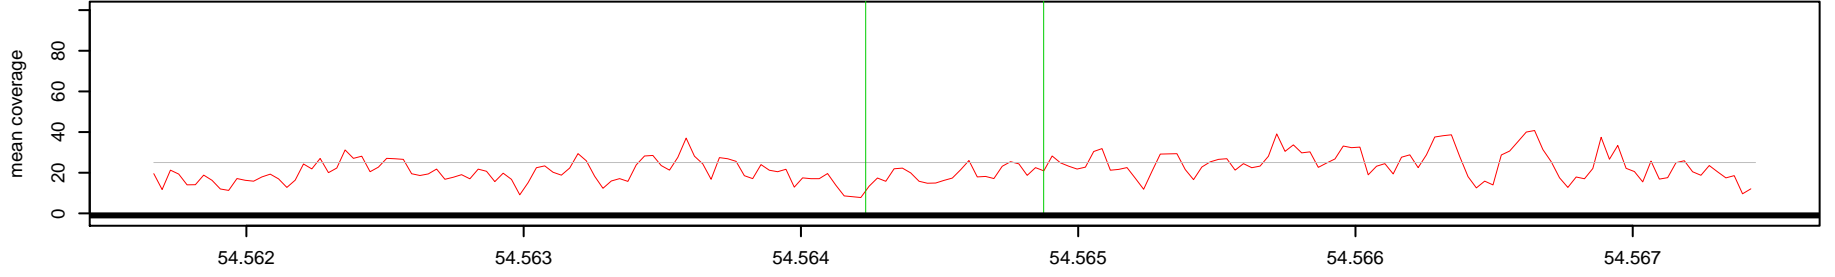

Log2( AK1 read depth / NA10851 read depth)

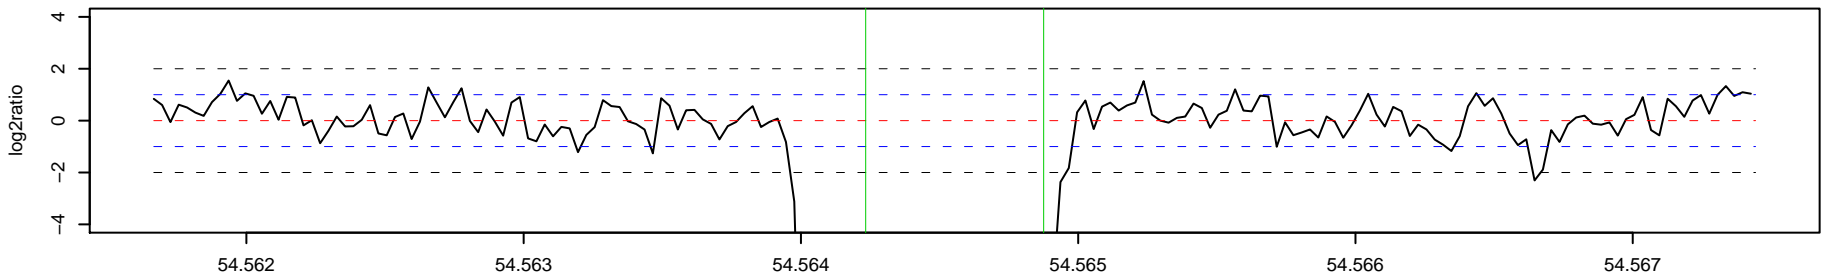

312 \_ AK1 Chr 7 : 69833974 – 69840875 , 6902 bp (aCGH relative log2ratio= 0.67 )

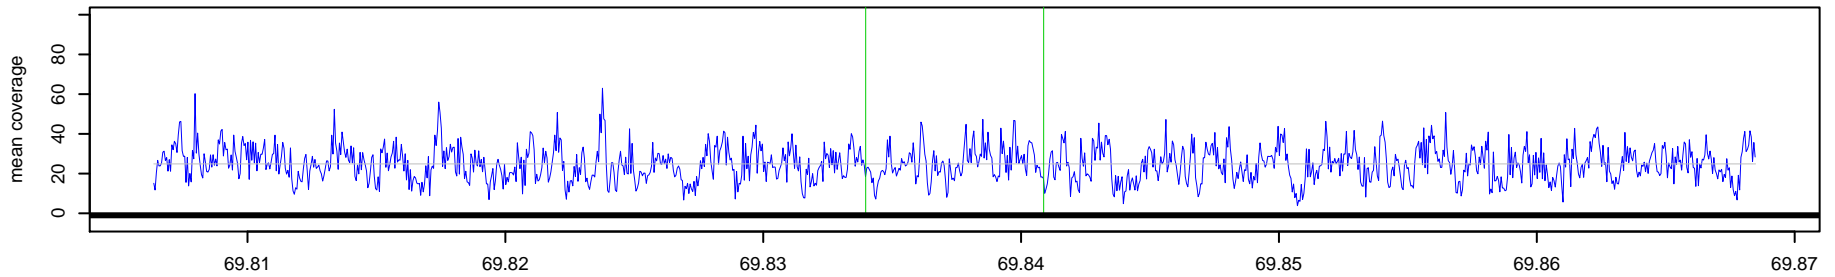

312 \_ NA10851 Chr 7 : 69833974 – 69840875 , 6902 bp (aCGH relative log2ratio= 0.67 )

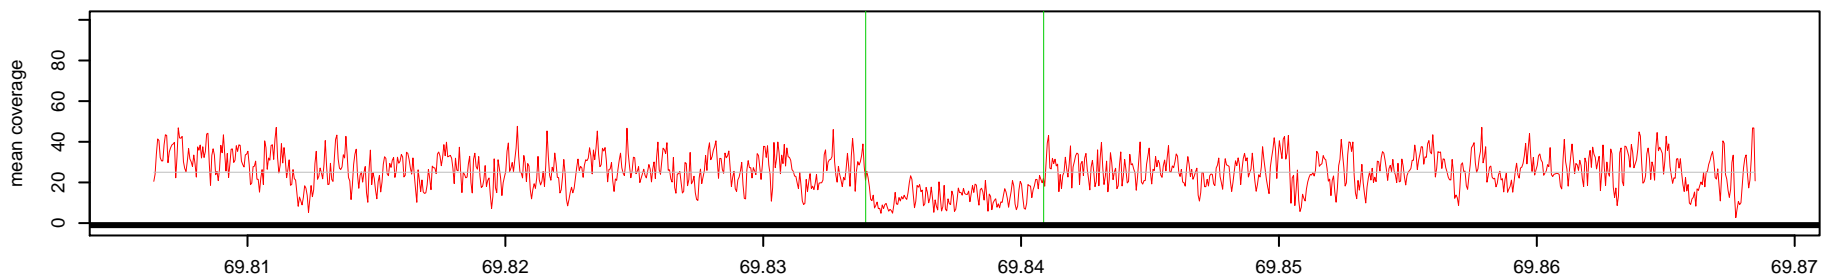

Log2( AK1 read depth / NA10851 read depth)

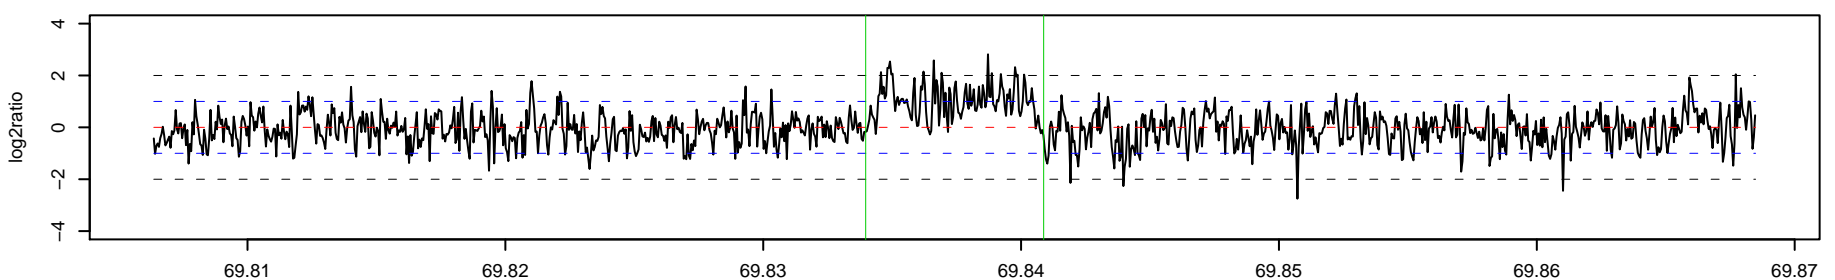



313\_AK1 Chr 7 : 75502553 – 75505822 , 3270 bp (aCGH relative log2ratio= 0.40 )

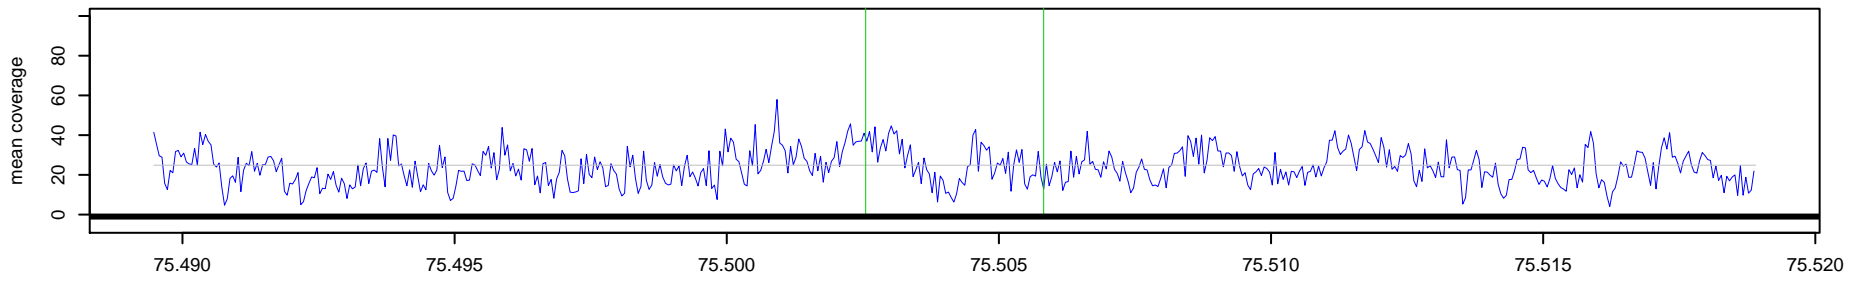

313\_NA10851 Chr 7 : 75502553 – 75505822 , 3270 bp (aCGH relative log2ratio= 0.40 )

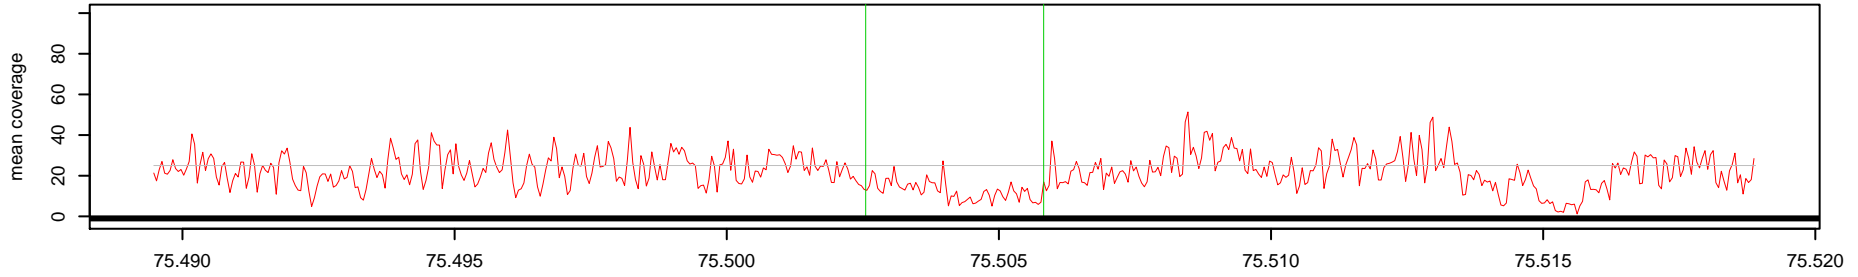

Log2( AK1 read depth / NA10851 read depth)

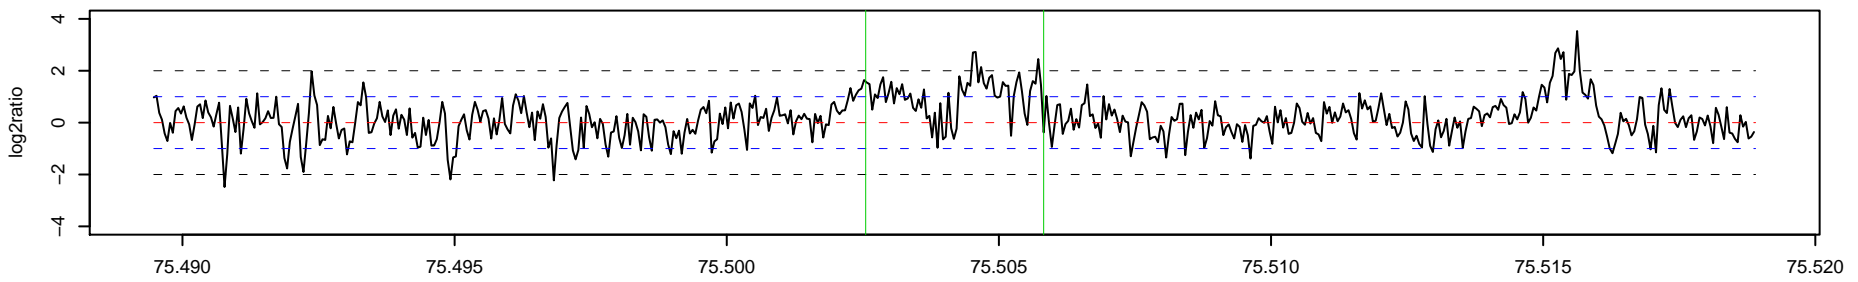

314\_AK1 Chr 7 : 79030097 – 79030670 , 574 bp (aCGH relative log2ratio= 0.51 )

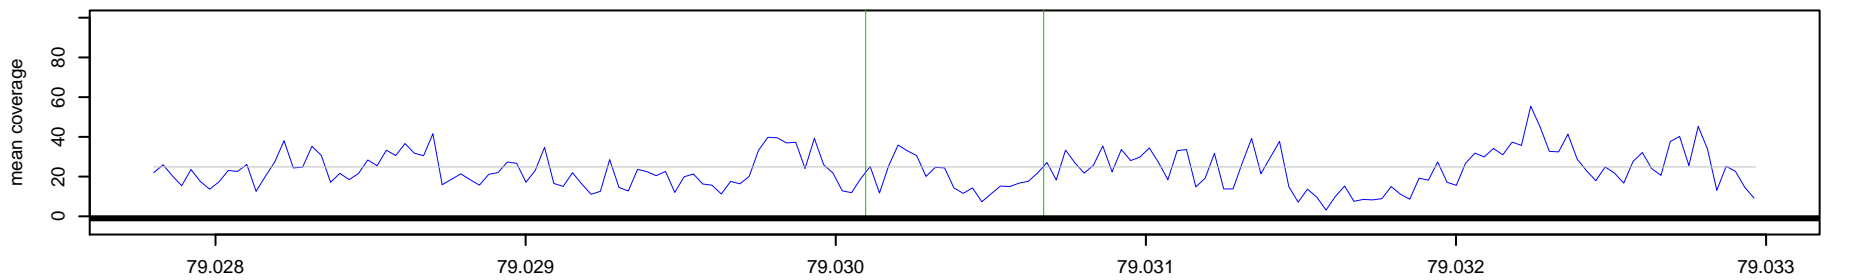

314\_NA10851 Chr 7 : 79030097 – 79030670 , 574 bp (aCGH relative log2ratio= 0.51 )

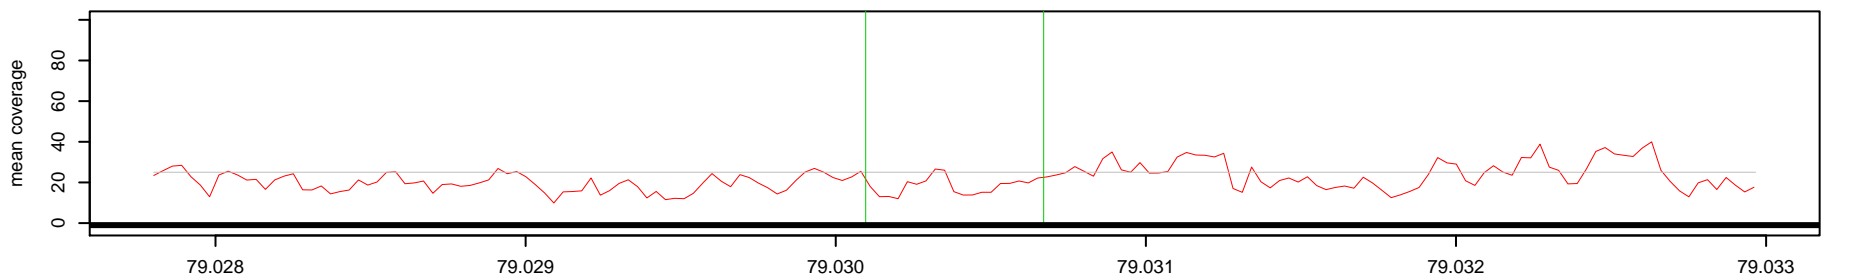

Log2( AK1 read depth / NA10851 read depth)

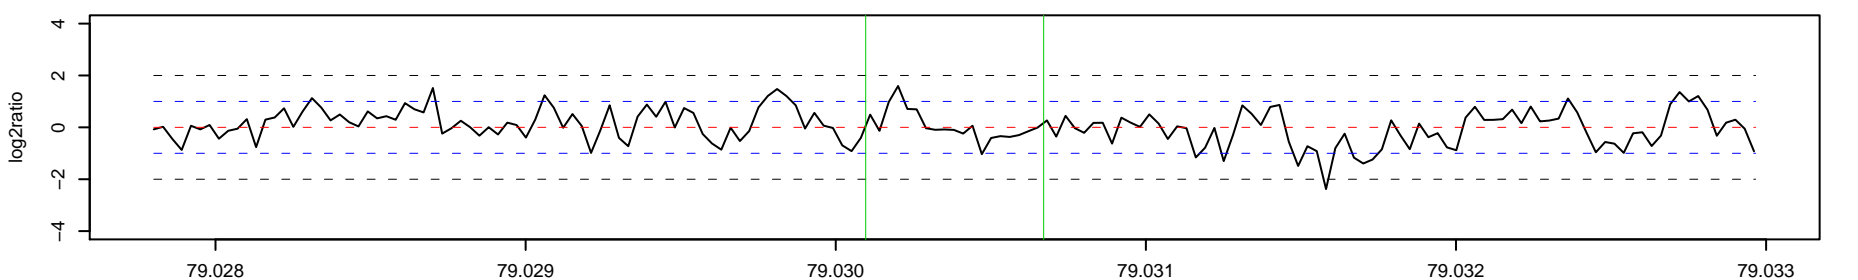

315\_AK1 Chr 7 : 82856168 – 82856956 , 789 bp (aCGH relative log2ratio= 0.68 )

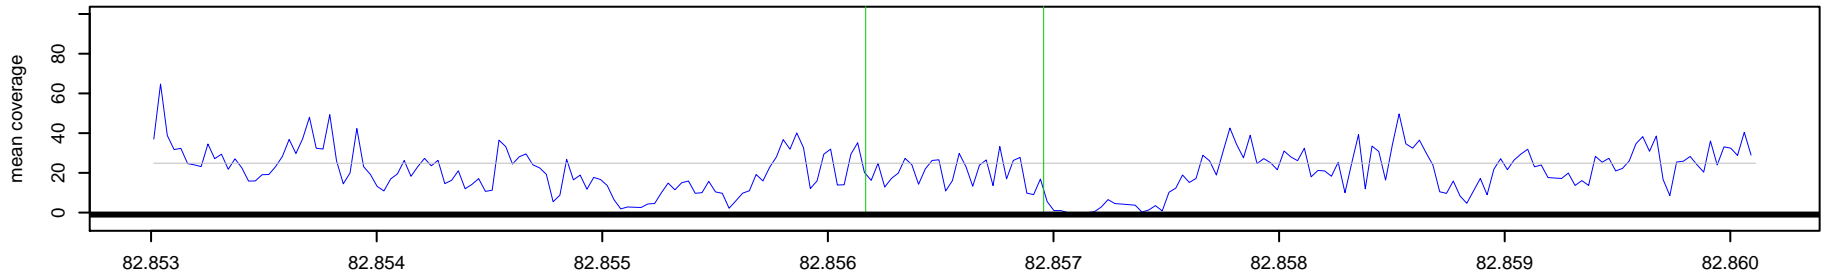

315\_NA10851 Chr 7 : 82856168 – 82856956 , 789 bp (aCGH relative log2ratio= 0.68 )

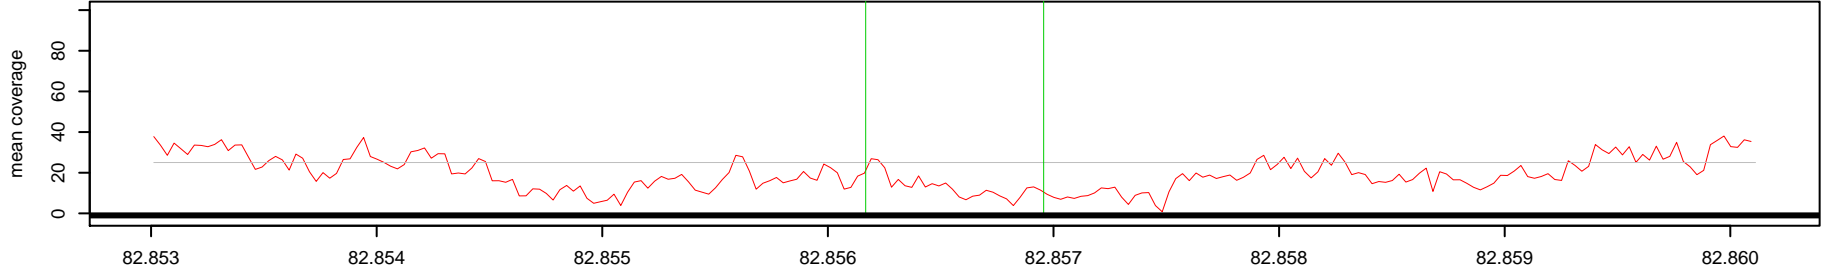

Log2( AK1 read depth / NA10851 read depth)

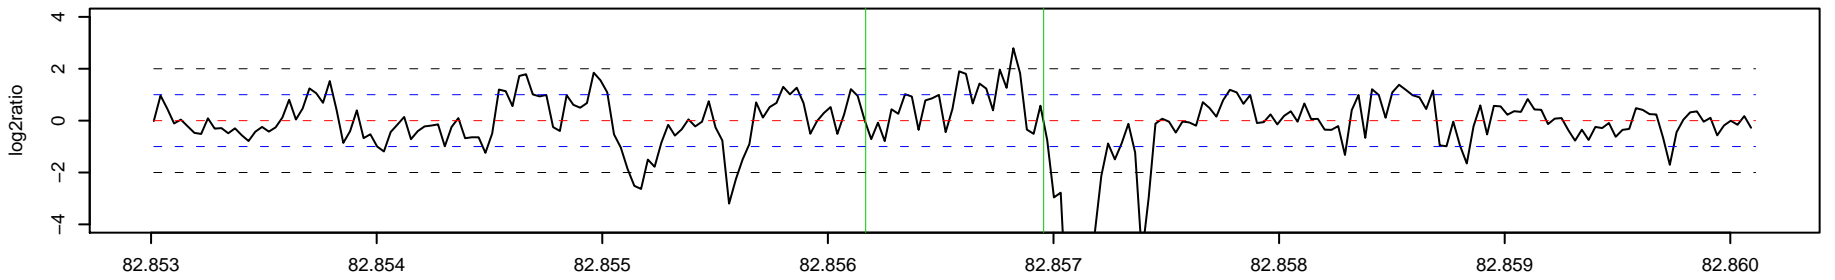

316\_AK1 Chr 7 : 82989411 – 82990652 , 1242 bp (aCGH relative log2ratio= -0.81 )

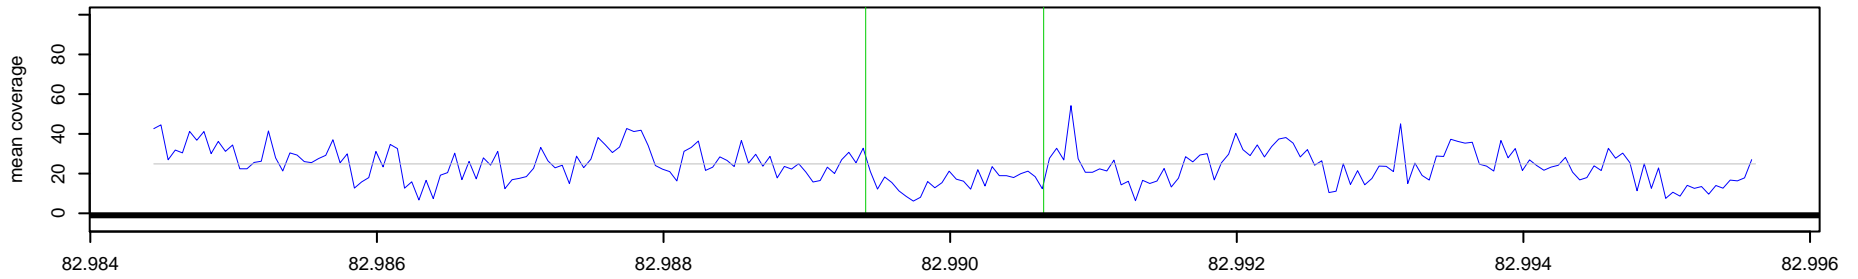

316\_NA10851 Chr 7 : 82989411 – 82990652 , 1242 bp (aCGH relative log2ratio= -0.81 )

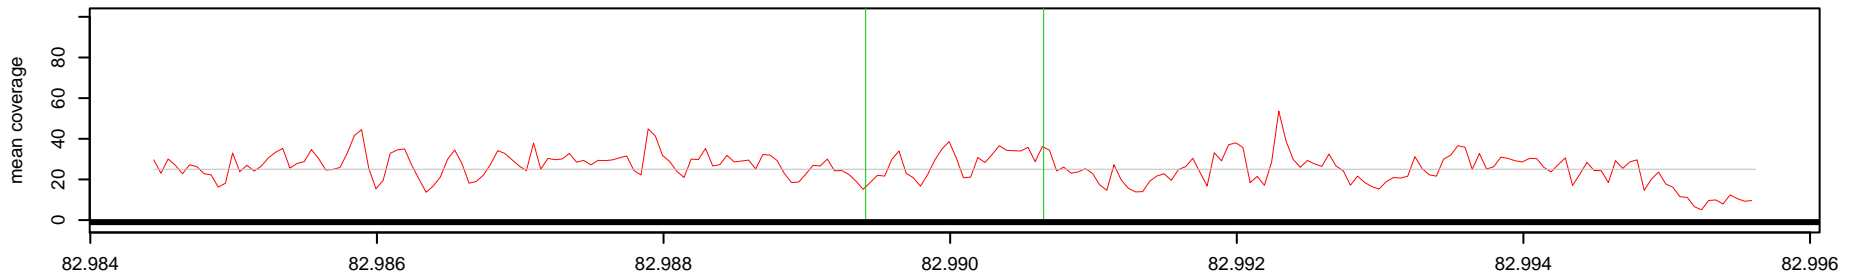

Log2( AK1 read depth / NA10851 read depth)

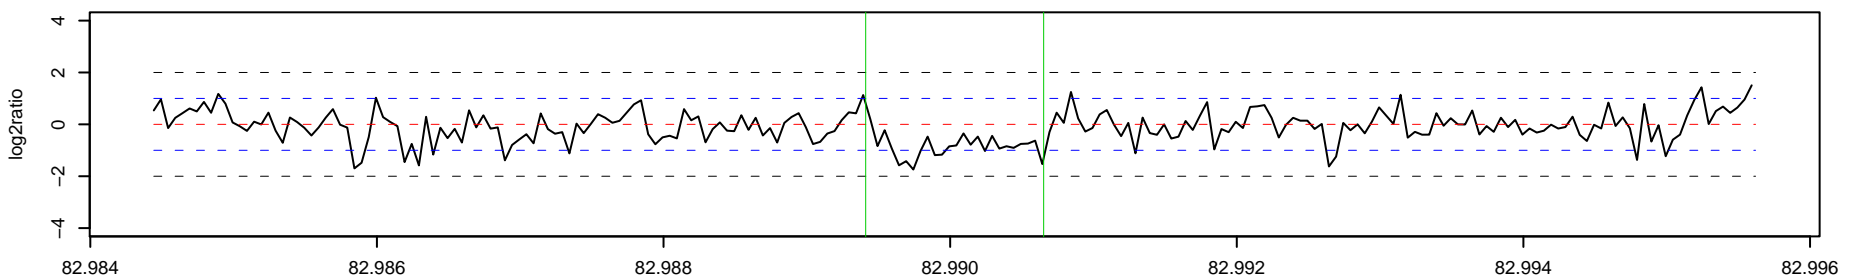

317\_AK1 Chr 7 : 86072920 – 86079896 , 6977 bp (aCGH relative log2ratio= -0.86 )

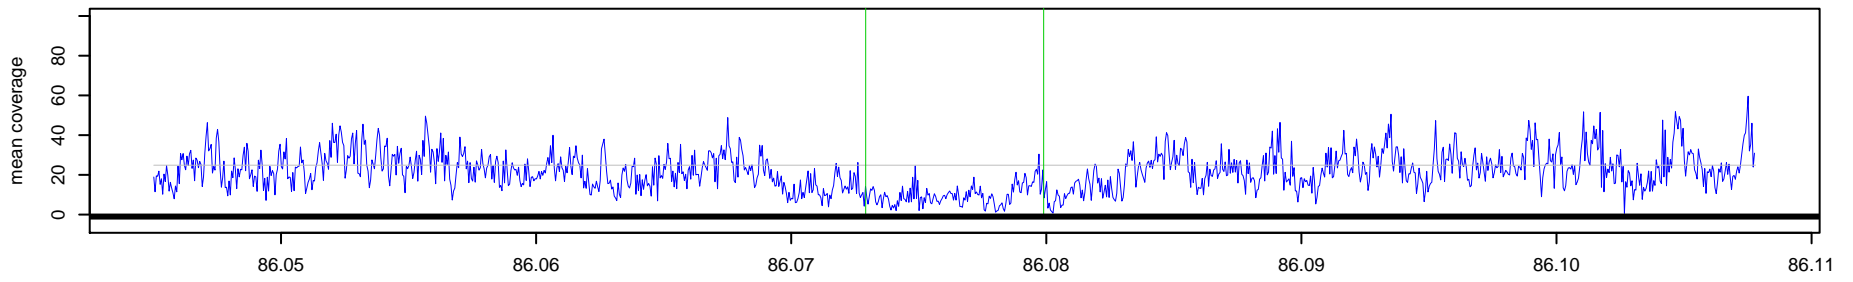

317\_NA10851 Chr 7 : 86072920 – 86079896 , 6977 bp (aCGH relative log2ratio= -0.86 )

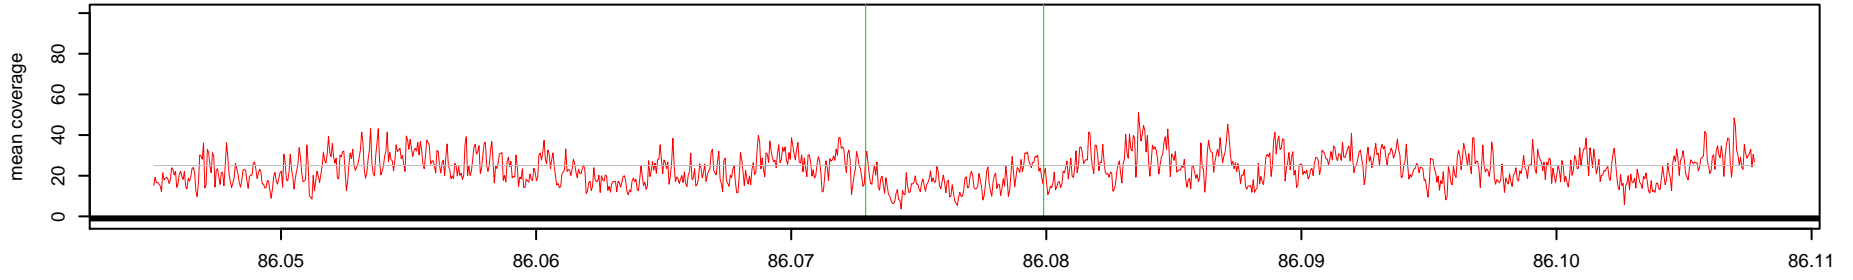

Log2( AK1 read depth / NA10851 read depth)

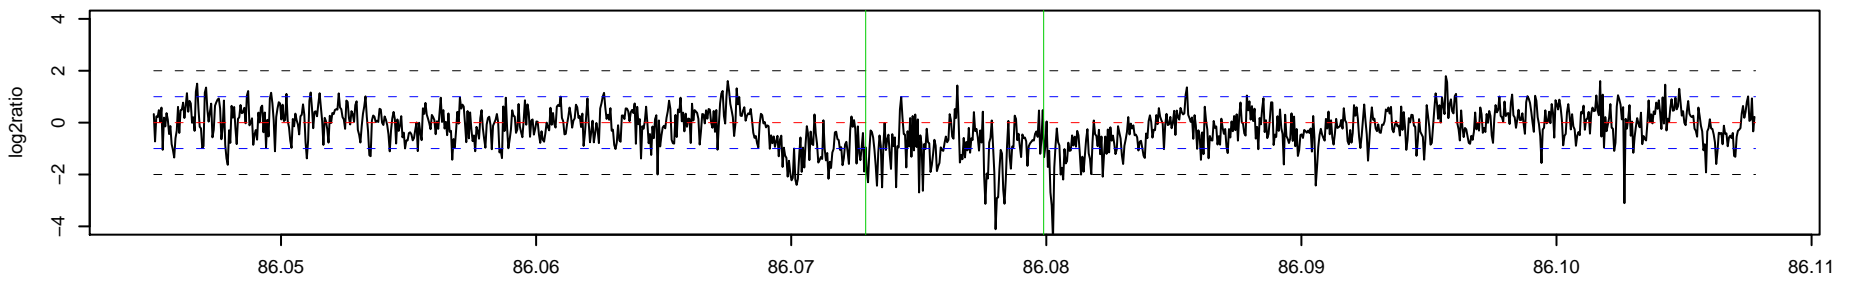

318\_AK1 Chr 7 : 89648357 – 89649726 , 1370 bp (aCGH relative log2ratio= 2.25 )

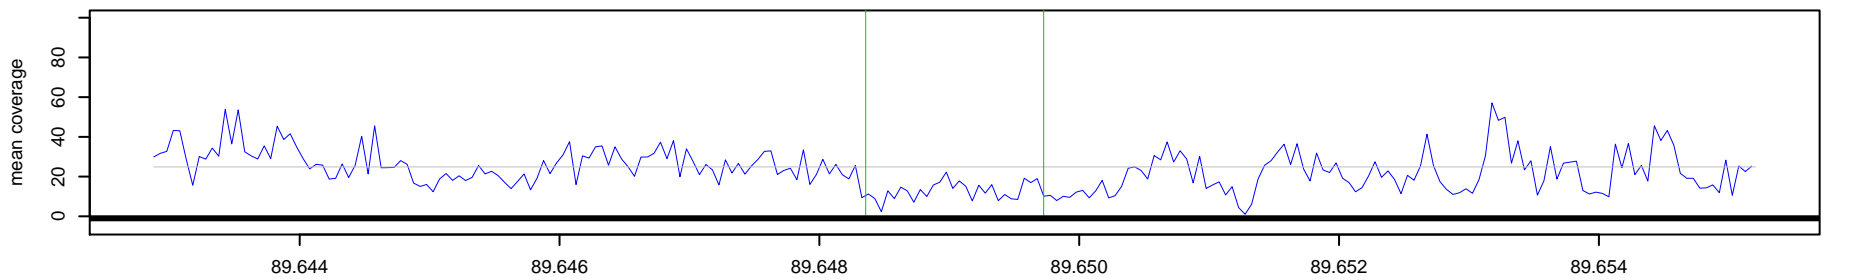

318\_NA10851 Chr 7 : 89648357 – 89649726 , 1370 bp (aCGH relative log2ratio= 2.25 )

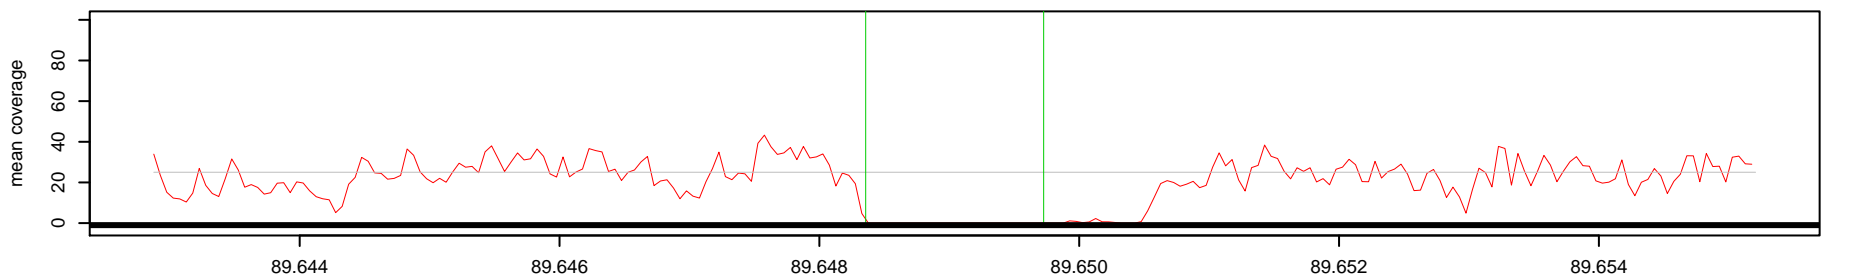

Log2( AK1 read depth / NA10851 read depth)

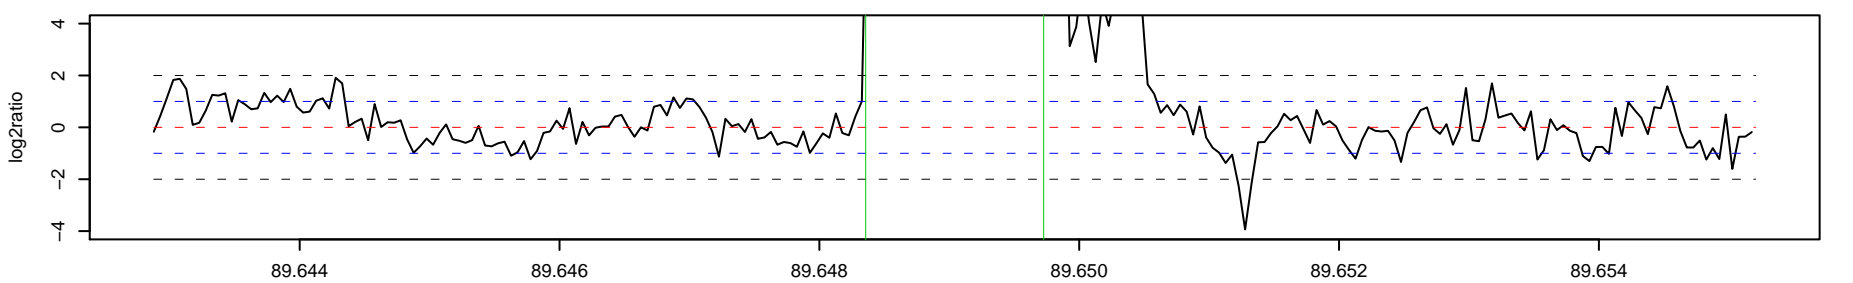

319\_AK1 Chr 7 : 90870713 – 90879046 , 8334 bp (aCGH relative log2ratio= -0.94 )

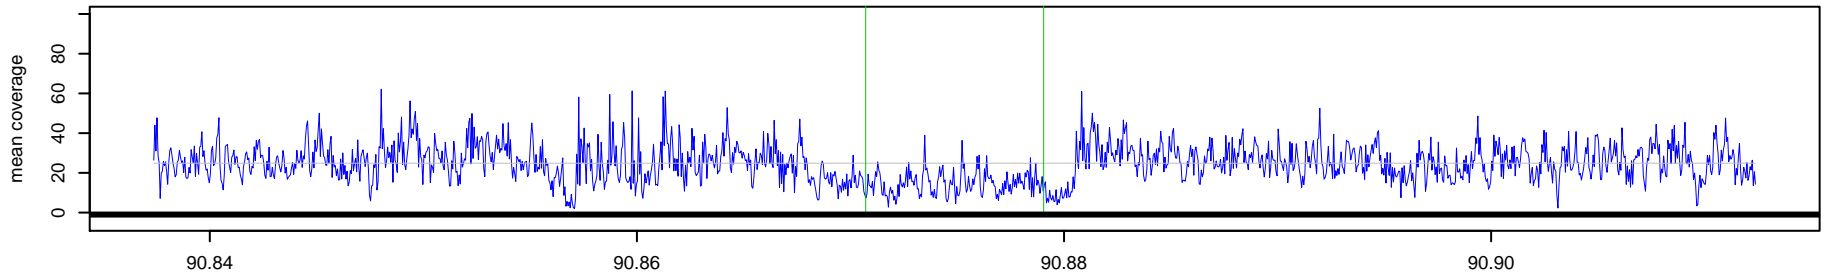

319\_NA10851 Chr 7 : 90870713 – 90879046 , 8334 bp (aCGH relative log2ratio= -0.94 )

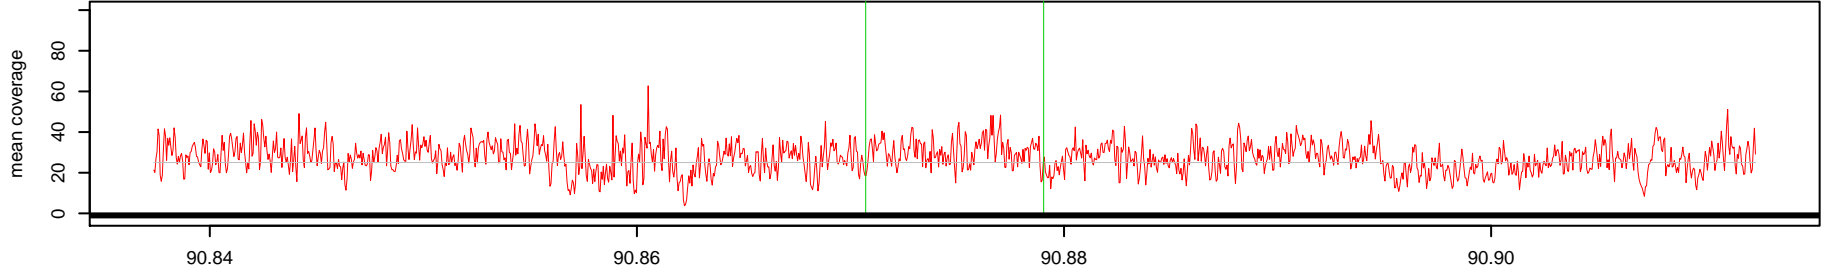

Log2( AK1 read depth / NA10851 read depth)

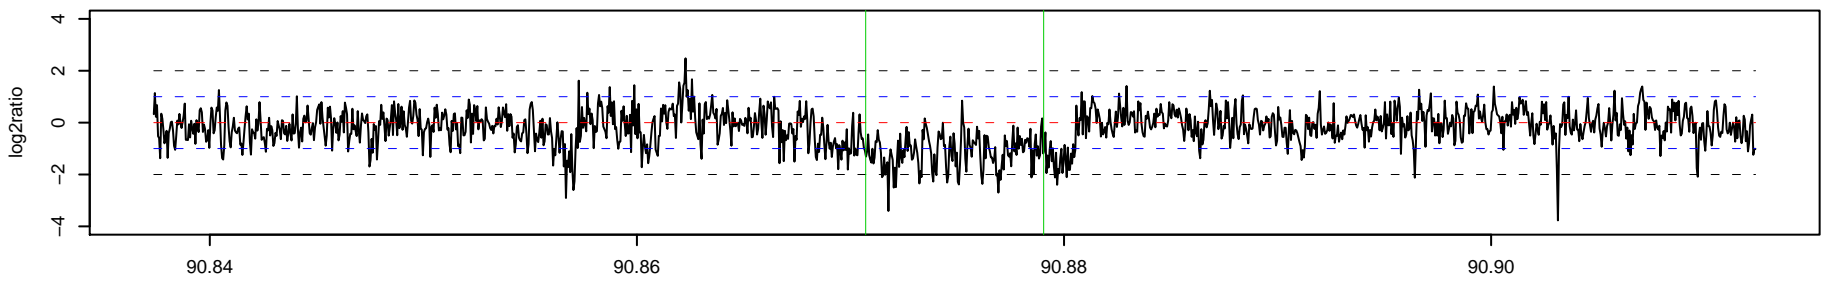

320\_AK1 Chr 7 : 93164889 – 93169497 , 4609 bp (aCGH relative log2ratio= 0.87 )

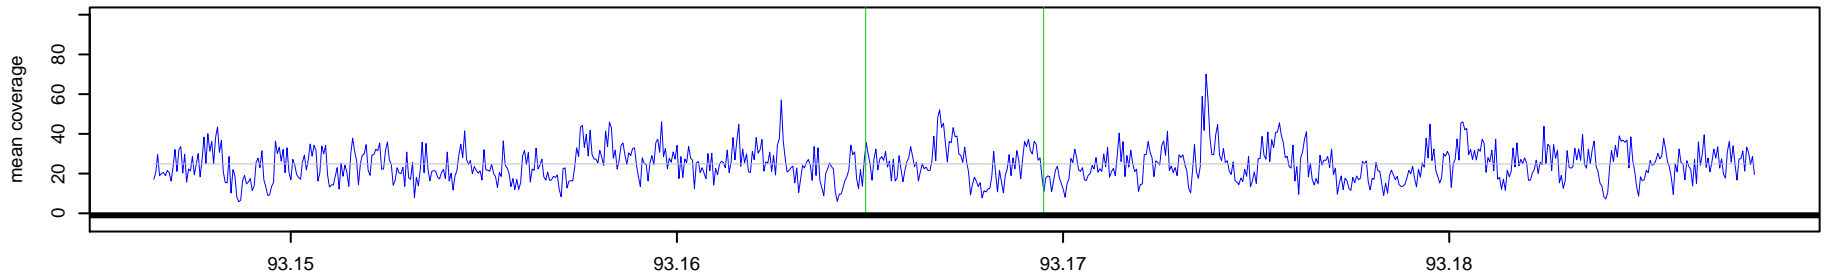

320\_NA10851 Chr 7 : 93164889 – 93169497 , 4609 bp (aCGH relative log2ratio= 0.87 )

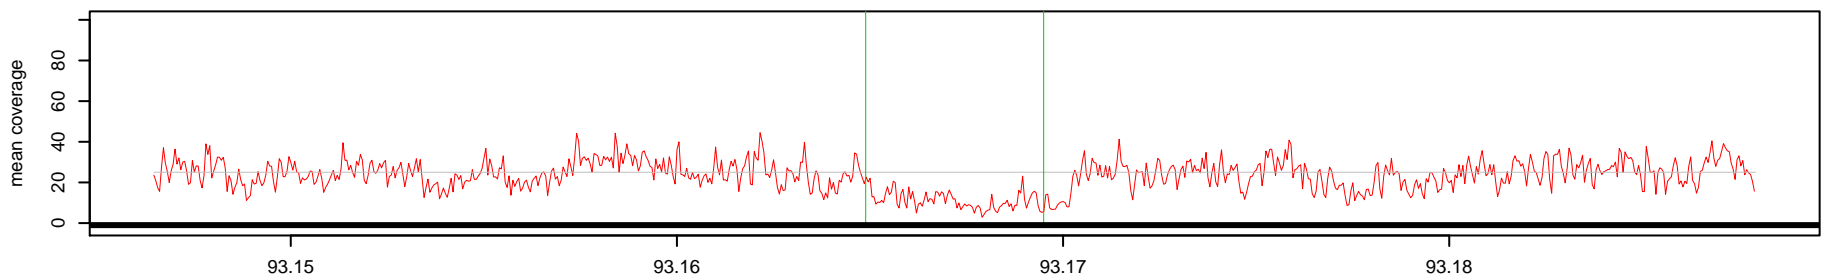

Log2( AK1 read depth / NA10851 read depth)

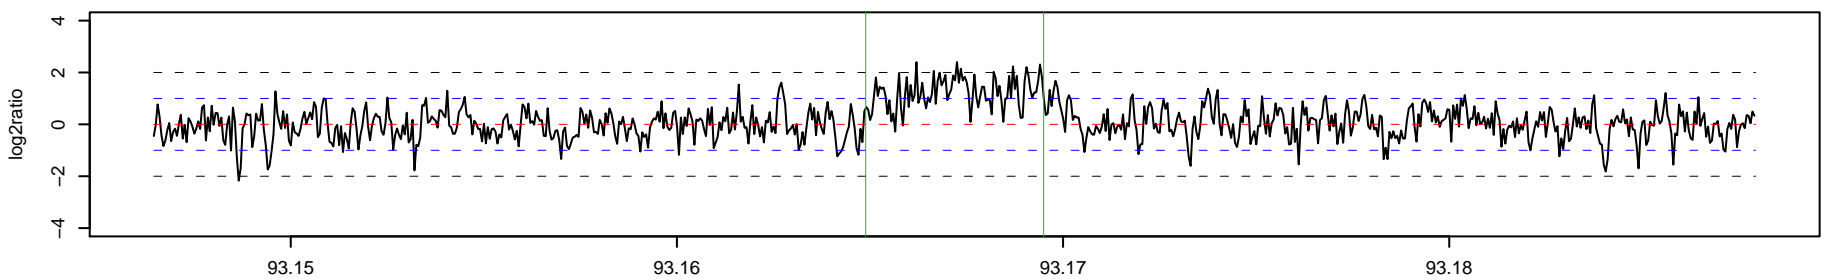

321 \_ AK1 Chr 7 : 96381256 – 96382217 , 962 bp (aCGH relative log2ratio= 0.55 )

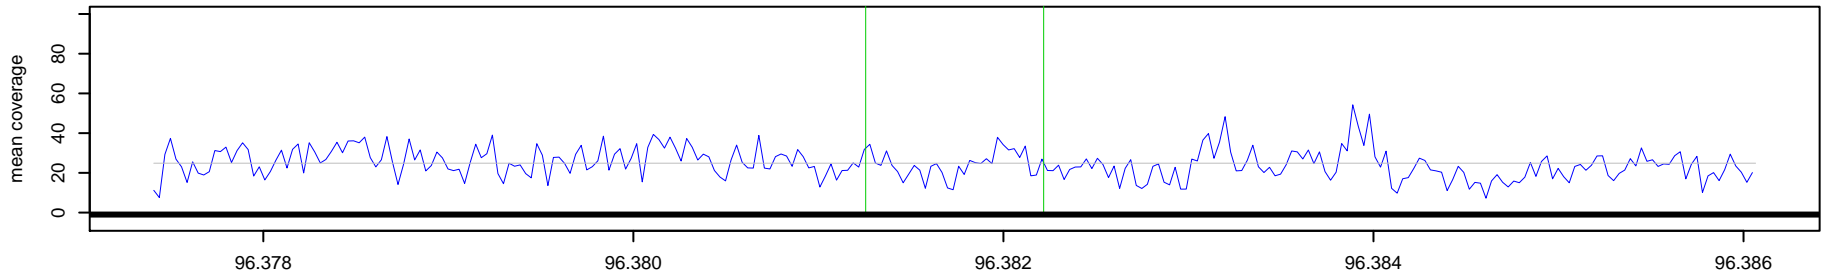

321 \_ NA10851 Chr 7 : 96381256 – 96382217 , 962 bp (aCGH relative log2ratio= 0.55 )

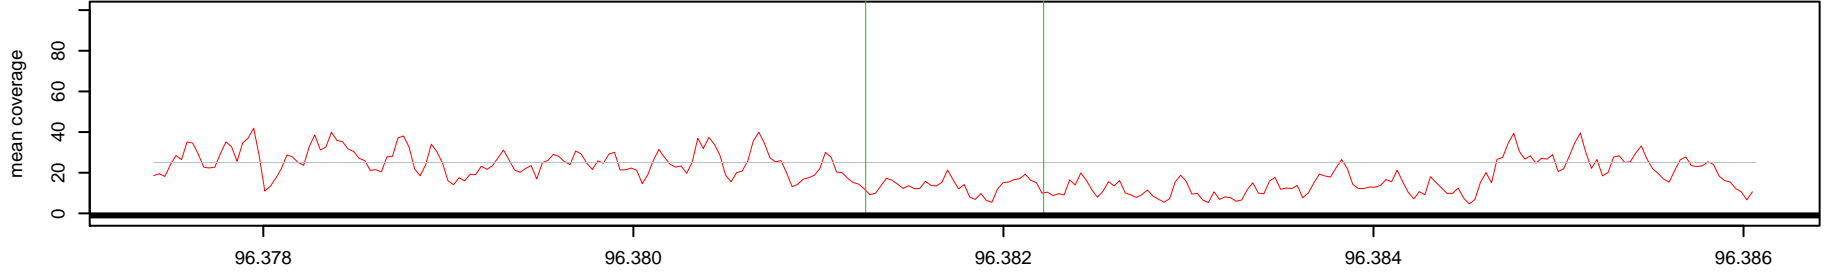

Log2( AK1 read depth / NA10851 read depth)

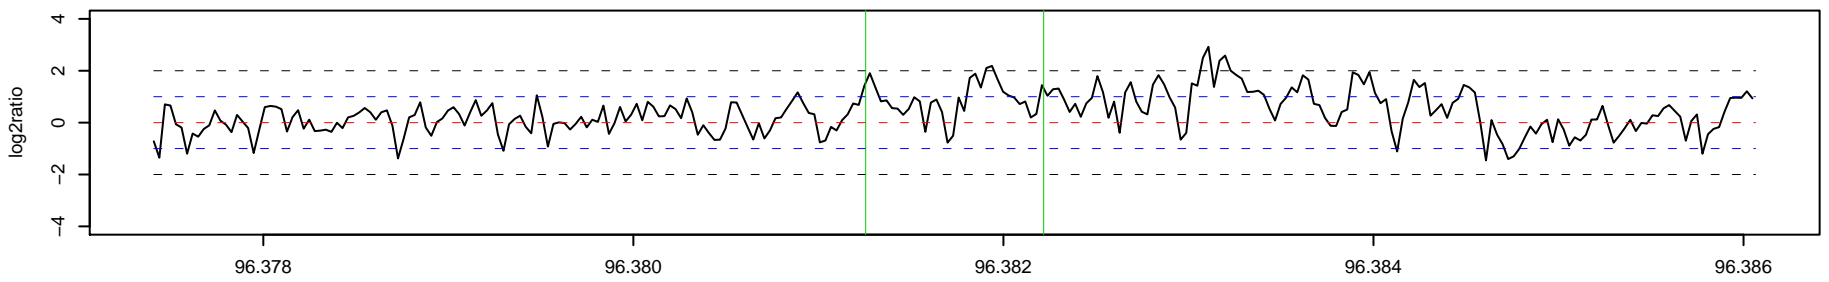

o

o

322 \_ AK1 Chr 7 : 97234208 – 97240459 , 6252 bp (aCGH relative log2ratio= -0.68 )

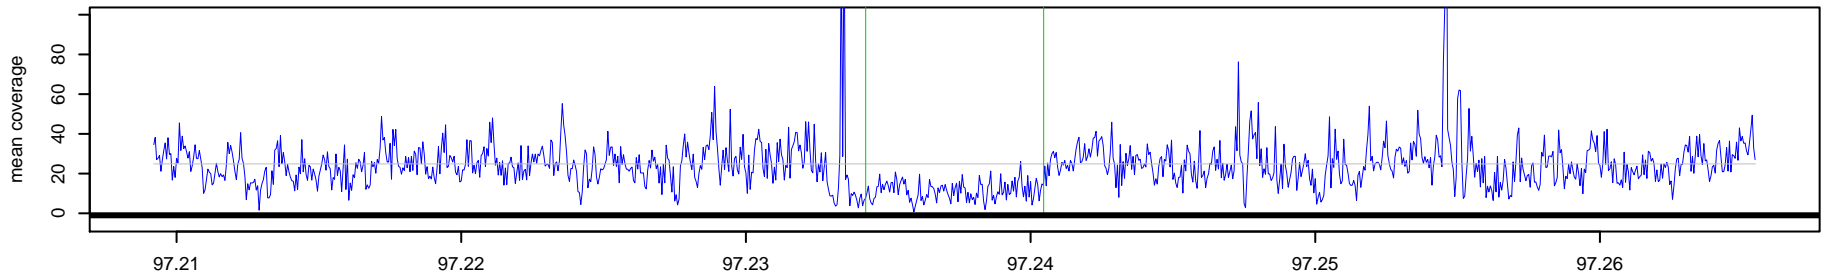

322 \_ NA10851 Chr 7 : 97234208 – 97240459 , 6252 bp (aCGH relative log2ratio= -0.68 )

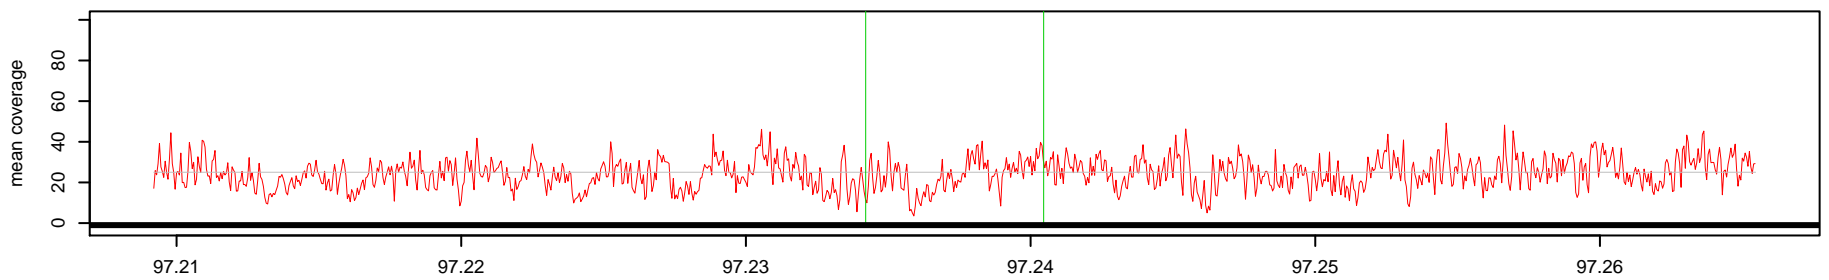

Log2( AK1 read depth / NA10851 read depth)

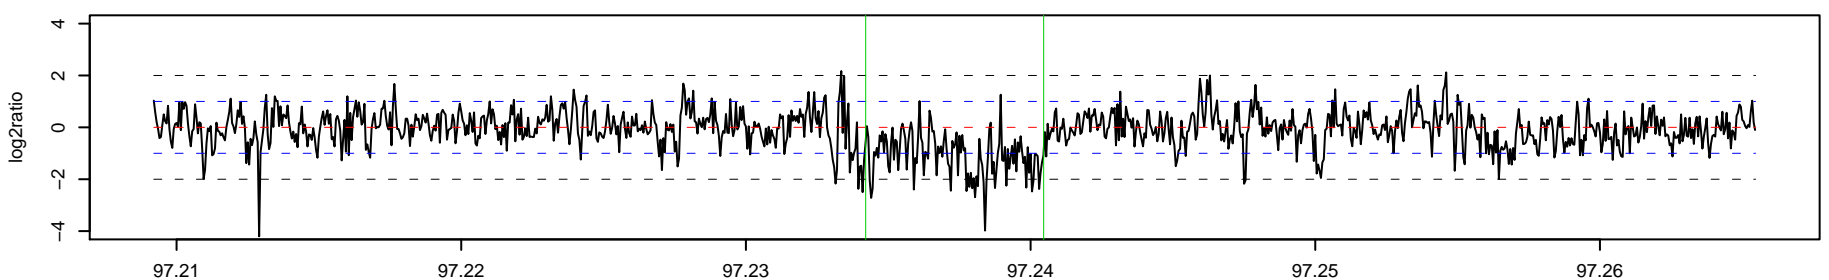

323\_AK1 Chr 7 : 97494237 – 97495054 , 818 bp (aCGH relative log2ratio= -0.81 )

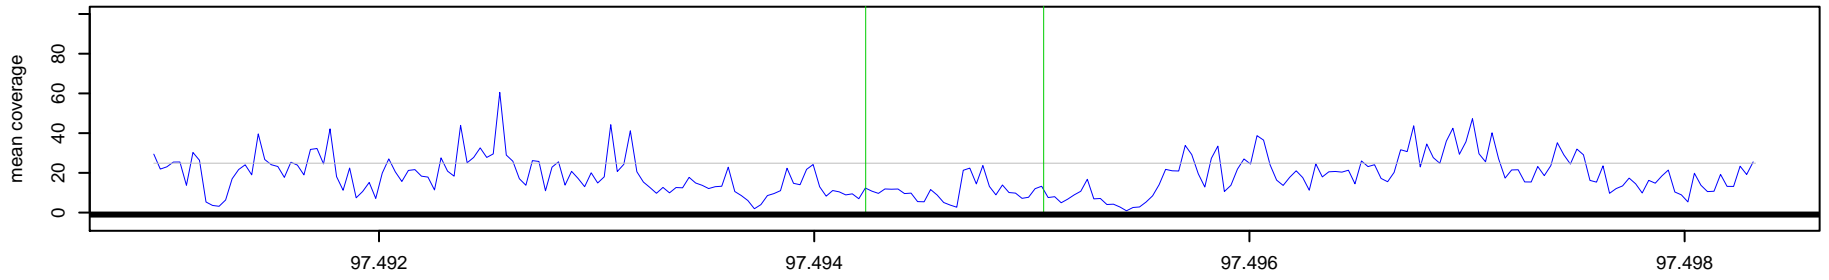

323\_NA10851 Chr 7 : 97494237 – 97495054 , 818 bp (aCGH relative log2ratio= -0.81 )

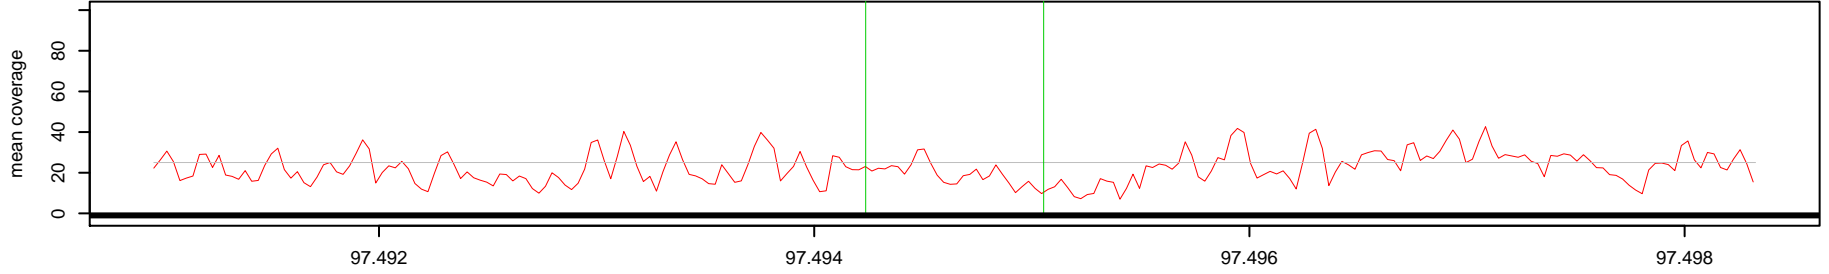

Log2( AK1 read depth / NA10851 read depth)

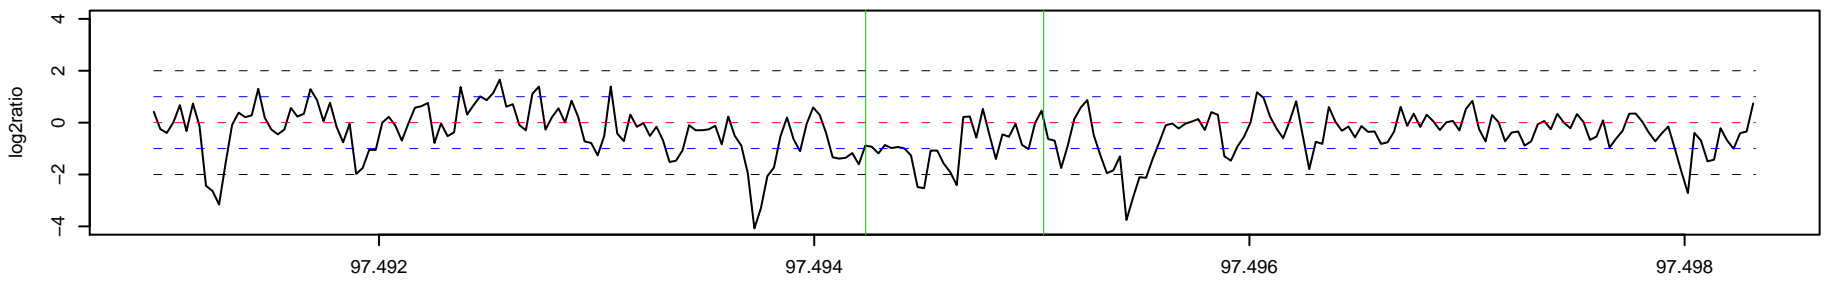

324\_AK1 Chr 7 : 104959878 – 104960324 , 447 bp (aCGH relative log2ratio= -0.55 )

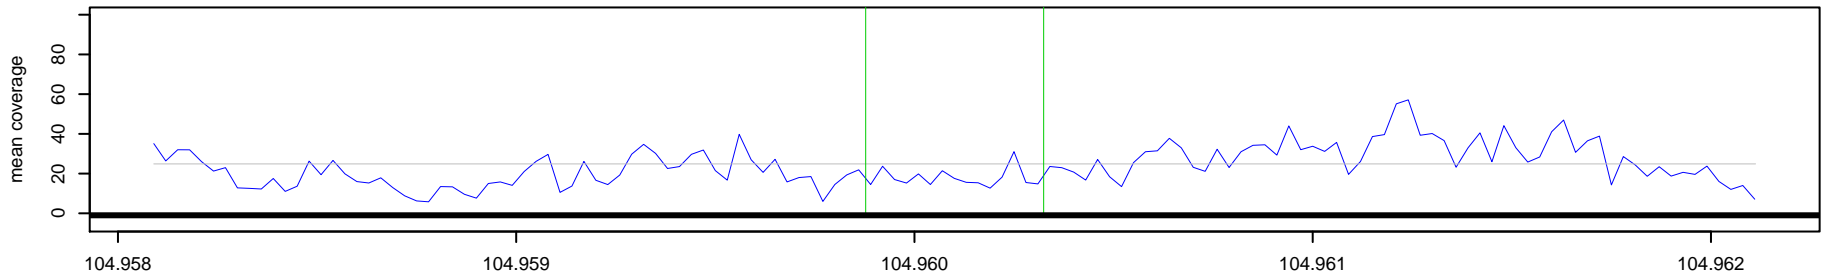

324\_NA10851 Chr 7 : 104959878 – 104960324 , 447 bp (aCGH relative log2ratio= -0.55 )

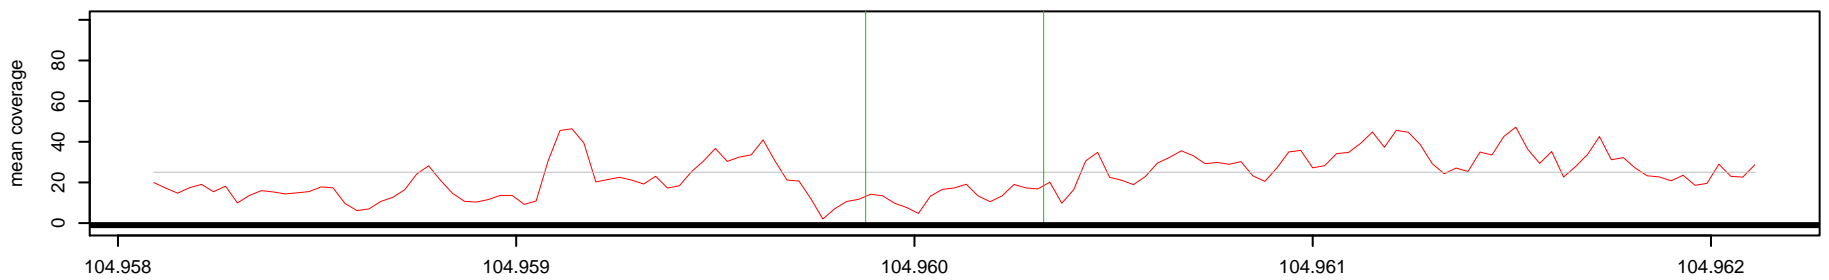

Log2( AK1 read depth / NA10851 read depth)

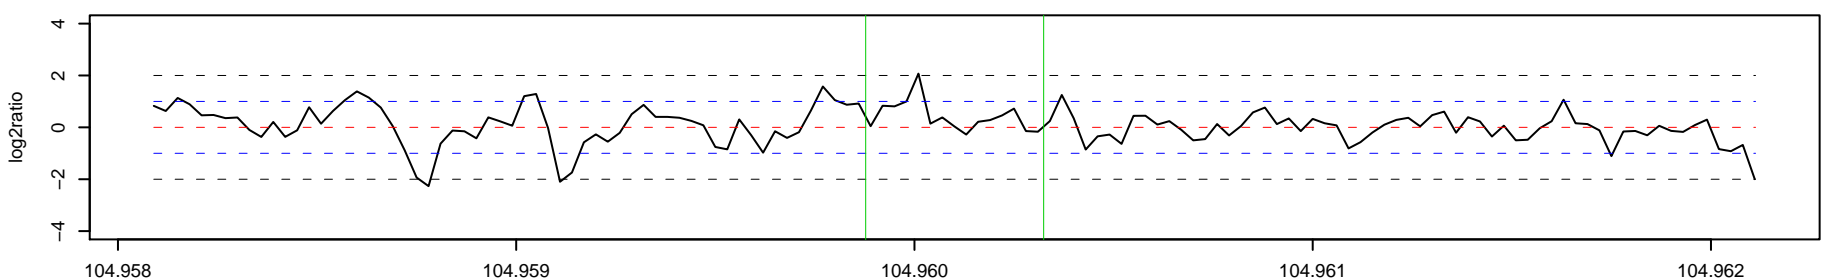

325 \_ AK1 Chr 7 : 105401554 – 105413193 , 11640 bp (aCGH relative log2ratio= -0.83 )

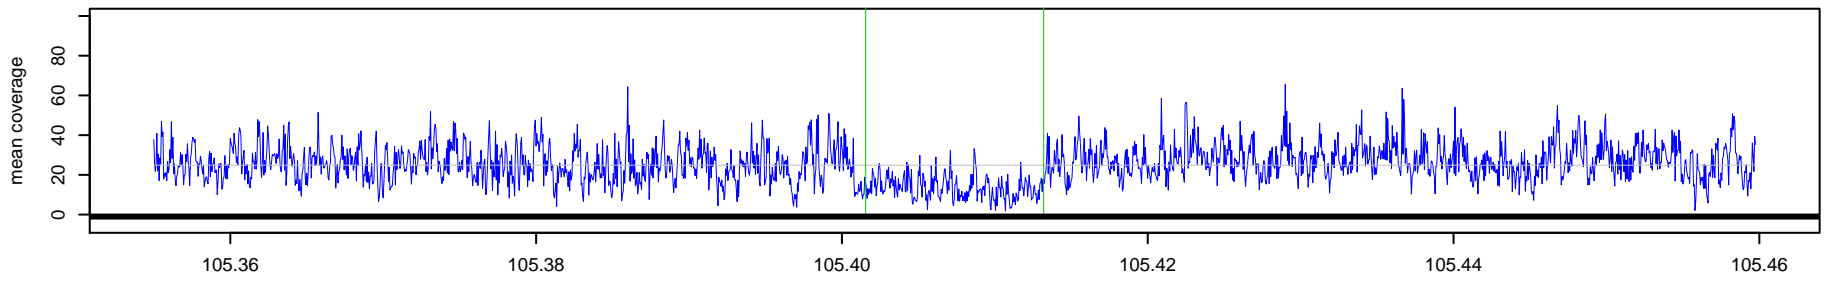

325 \_ NA10851 Chr 7 : 105401554 – 105413193 , 11640 bp (aCGH relative log2ratio= -0.83 )

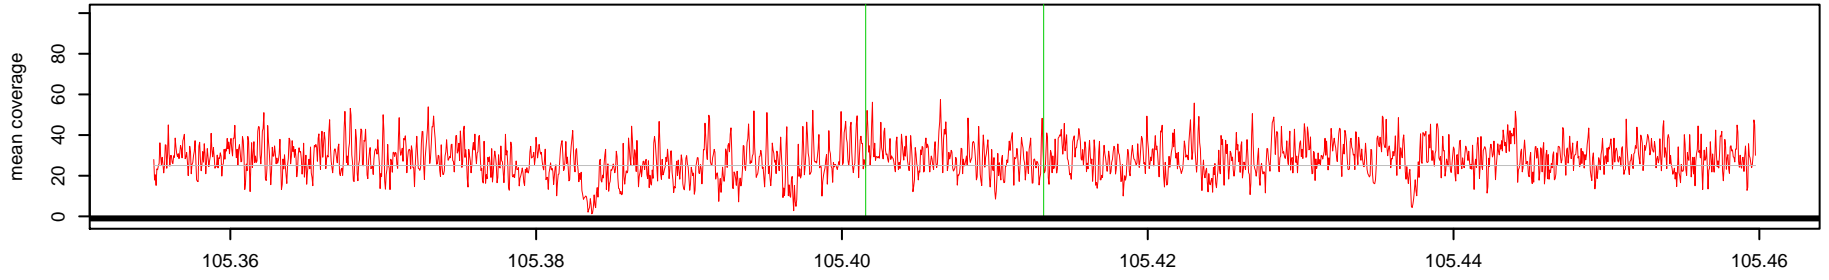

Log2( AK1 read depth / NA10851 read depth)

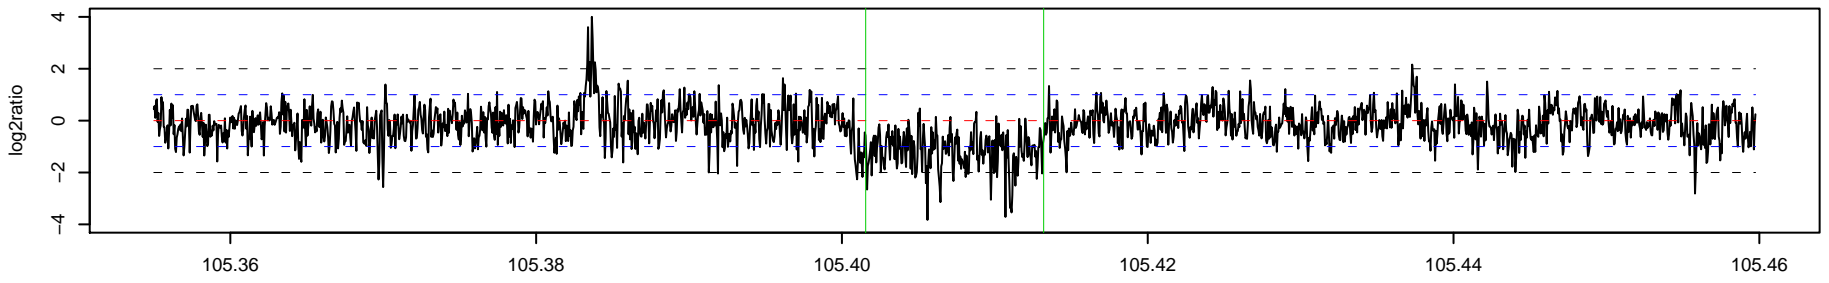

o

o

326 \_ AK1 Chr 7 : 106778284 – 106781523 , 3240 bp (aCGH relative log2ratio= -0.98 )

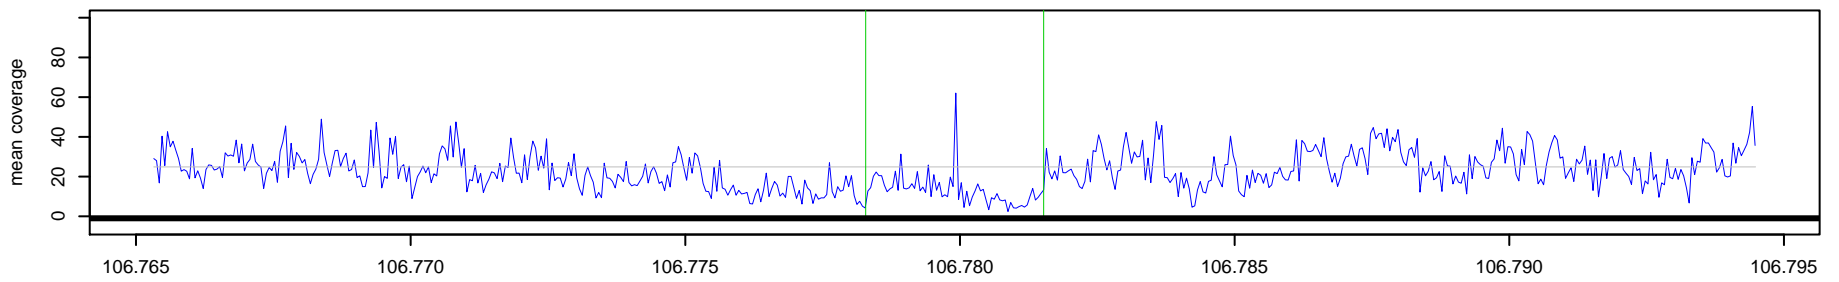

326 \_ NA10851 Chr 7 : 106778284 – 106781523 , 3240 bp (aCGH relative log2ratio= -0.98 )

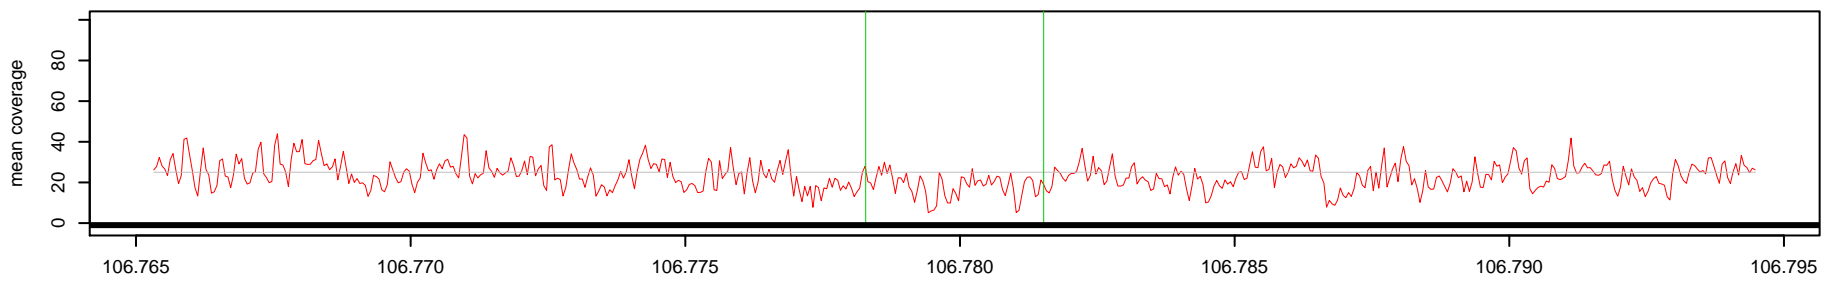

Log2( AK1 read depth / NA10851 read depth)

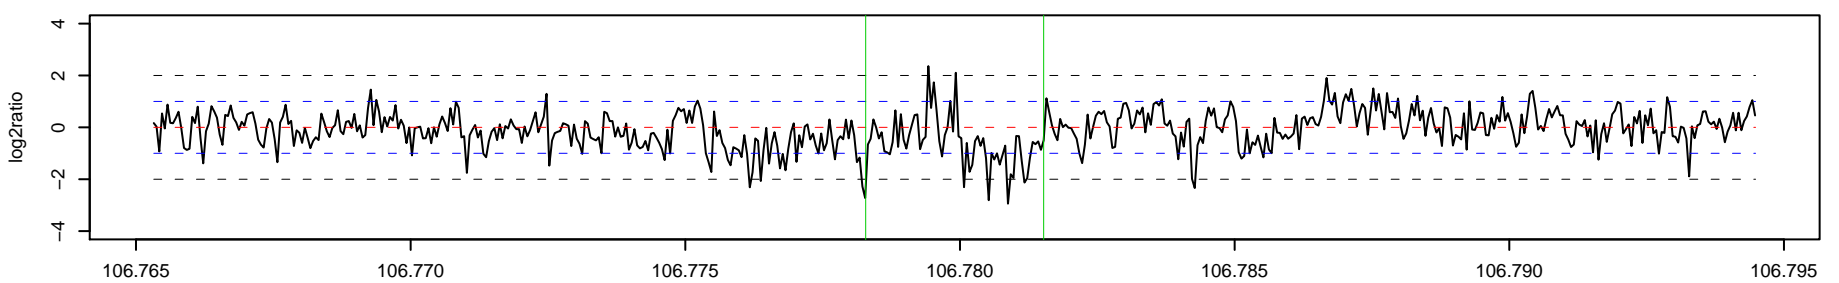

327 \_ AK1 Chr 7 : 109969117 – 109975668 , 6552 bp (aCGH relative log2ratio= 0.85 )

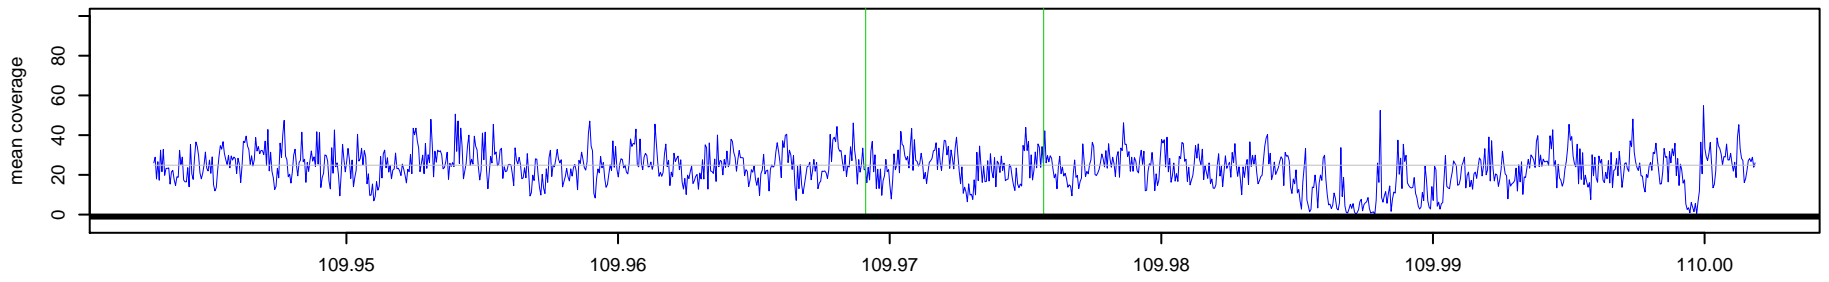

327 \_ NA10851 Chr 7 : 109969117 – 109975668 , 6552 bp (aCGH relative log2ratio= 0.85 )

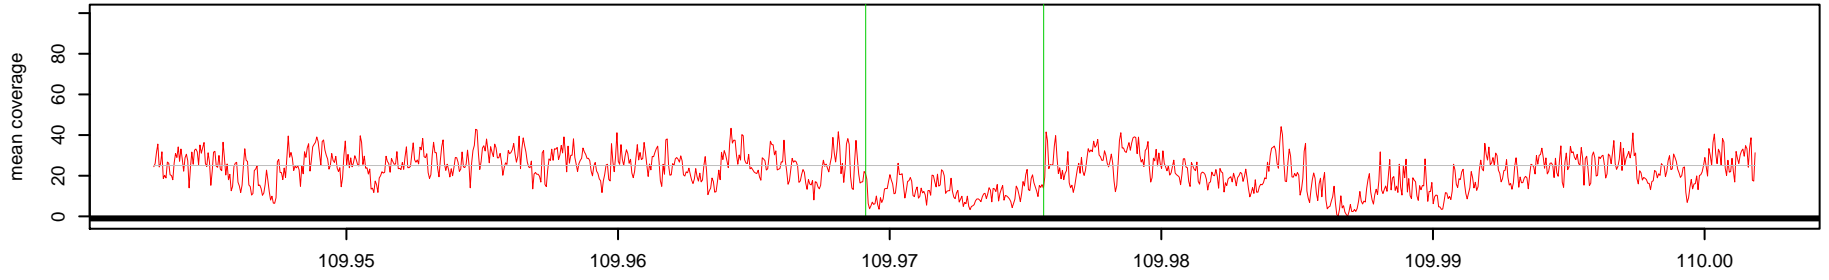

Log2( AK1 read depth / NA10851 read depth)

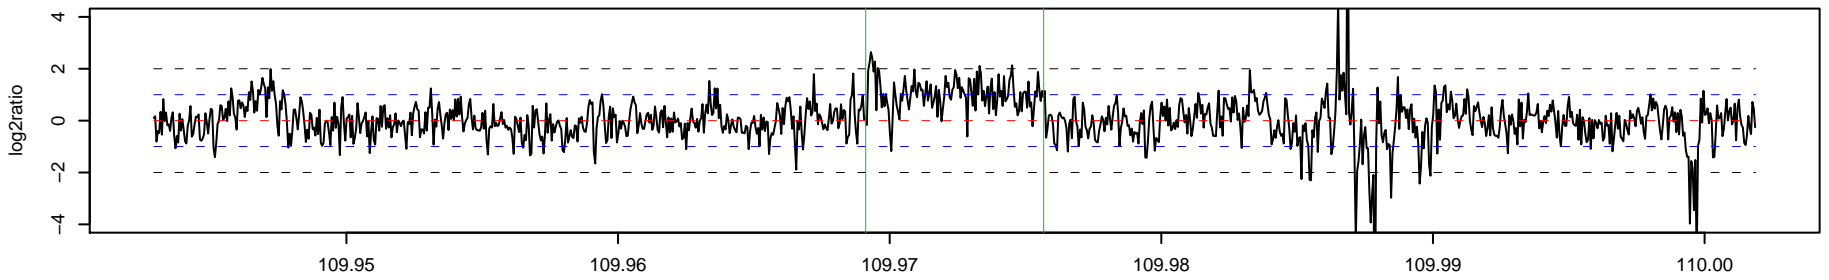

328 \_ AK1 Chr 7 : 125833045 – 125837724 , 4680 bp (aCGH relative log2ratio= -4.34 )

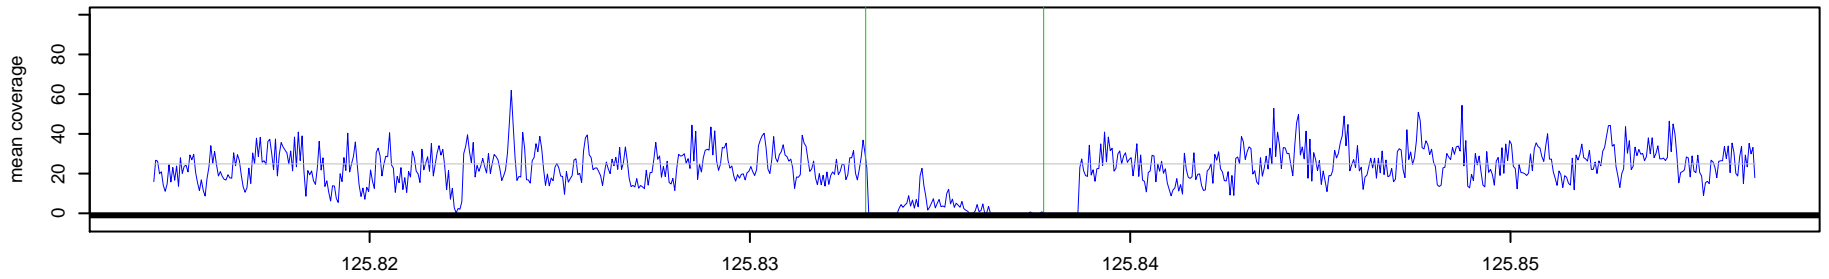

328 \_ NA10851 Chr 7 : 125833045 – 125837724 , 4680 bp (aCGH relative log2ratio= -4.34 )

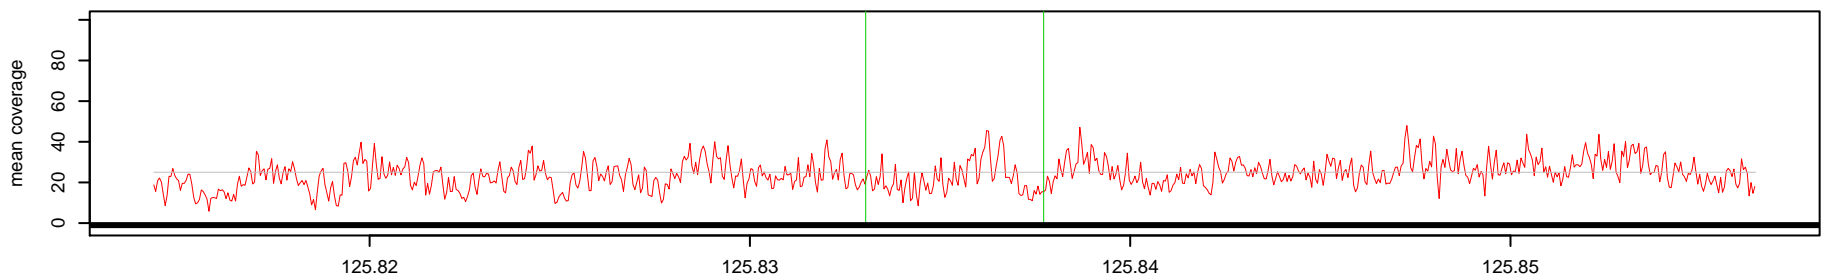

Log2( AK1 read depth / NA10851 read depth)

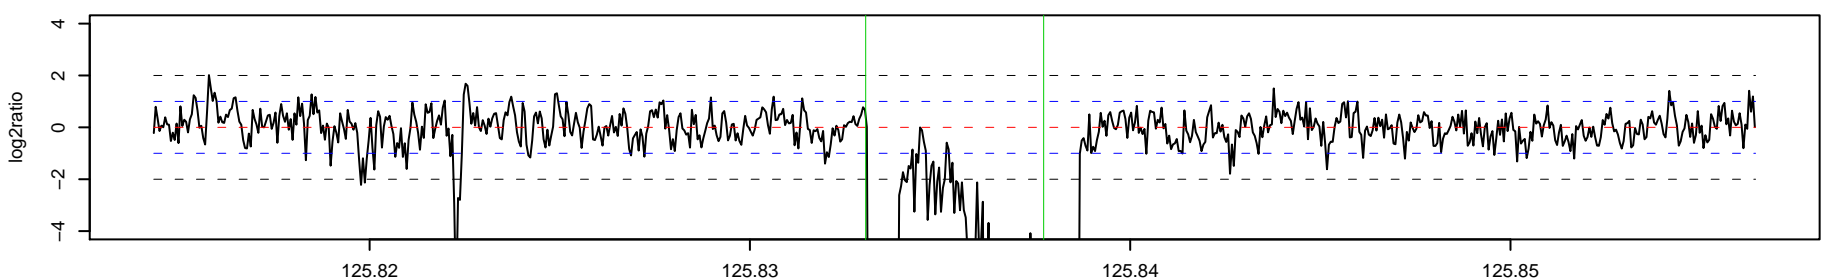



329\_AK1 Chr 7 : 133435616 – 133448477 , 12862 bp (aCGH relative log2ratio= 1.99 )

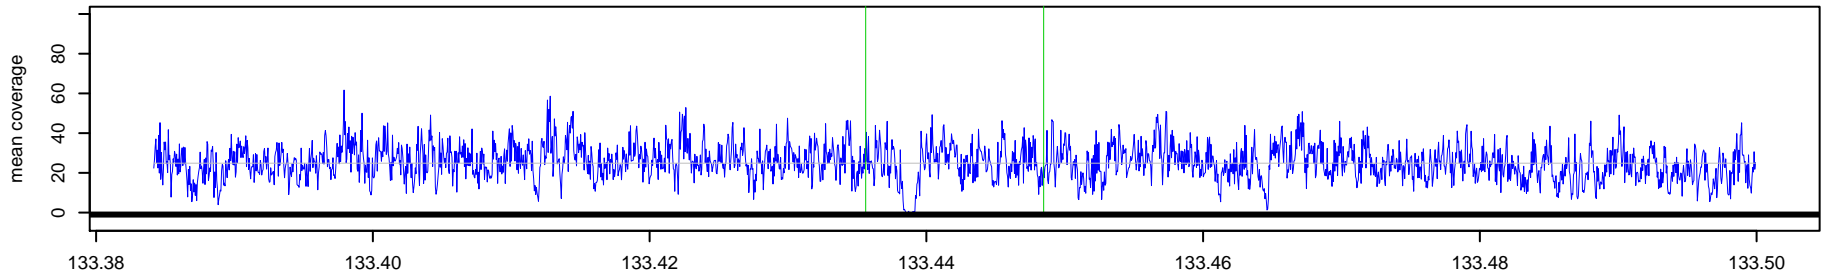

329\_NA10851 Chr 7 : 133435616 – 133448477 , 12862 bp (aCGH relative log2ratio= 1.99 )

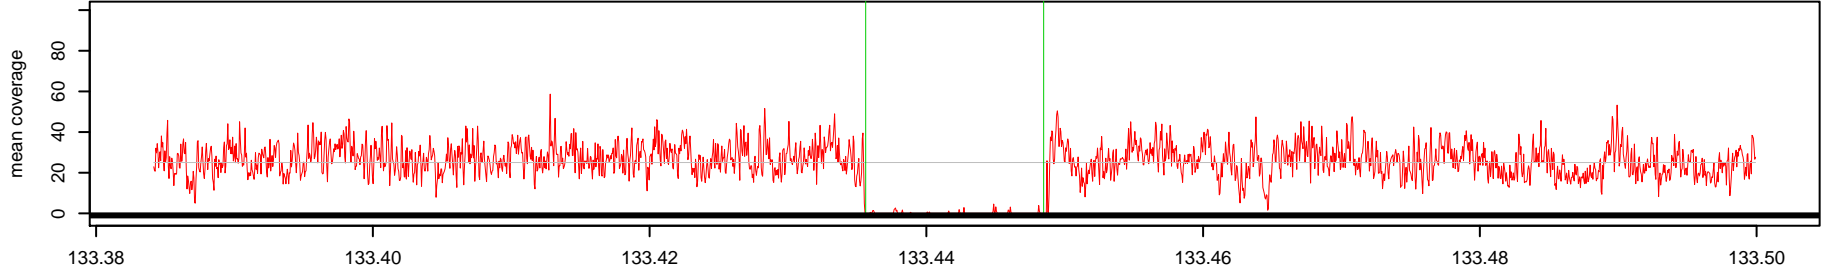

Log2( AK1 read depth / NA10851 read depth)

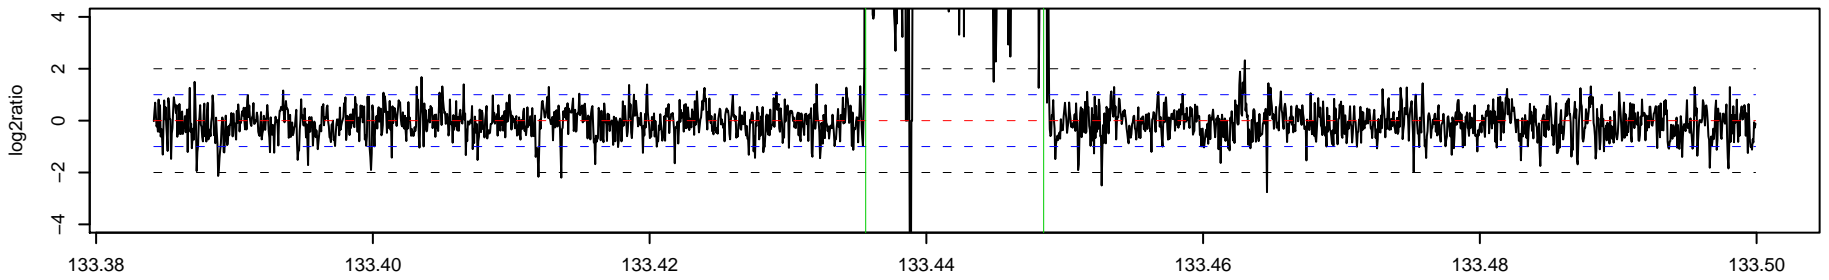

o

o

330\_AK1 Chr 7 : 139835766 – 139836210 , 445 bp (aCGH relative log2ratio= 0.88 )

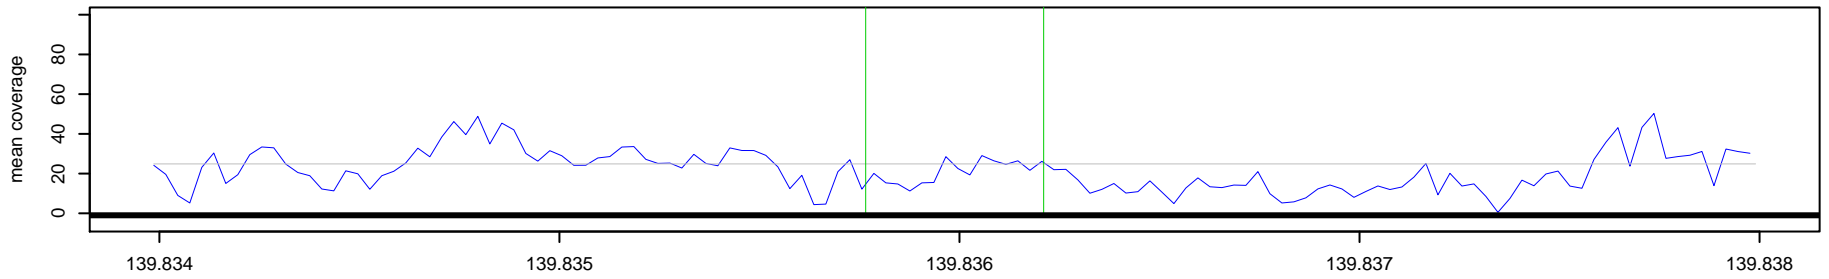

330\_NA10851 Chr 7 : 139835766 – 139836210 , 445 bp (aCGH relative log2ratio= 0.88 )

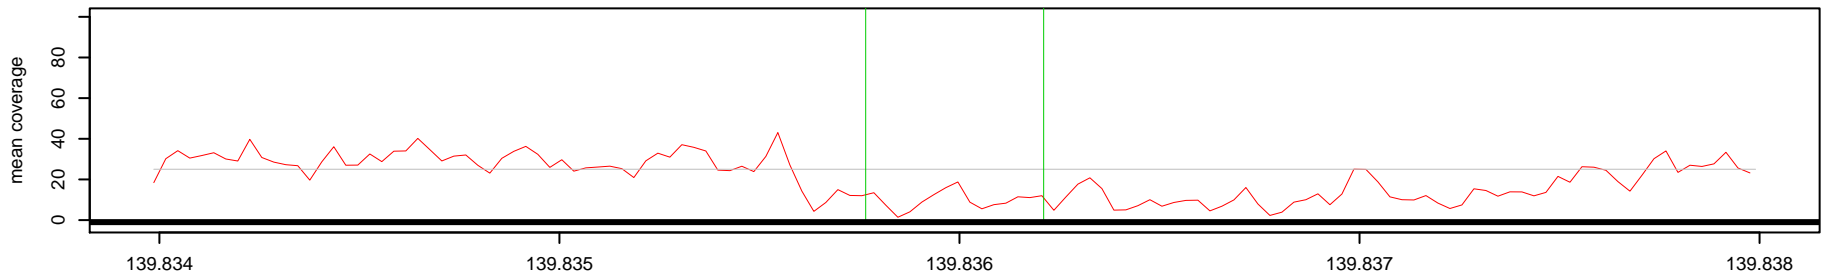

Log2( AK1 read depth / NA10851 read depth)

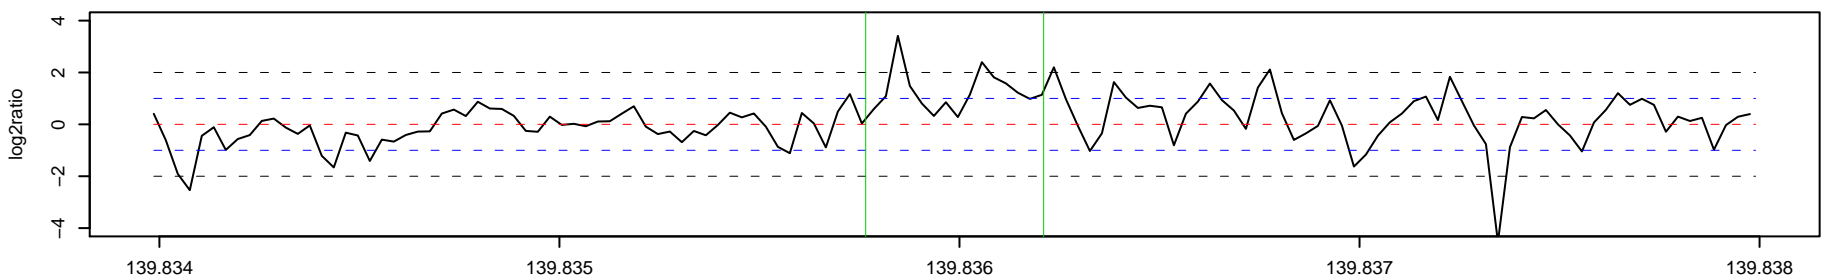

331 \_ AK1 Chr 7 : 141411755 – 141440474 , 28720 bp (aCGH relative log2ratio= -0.78 )

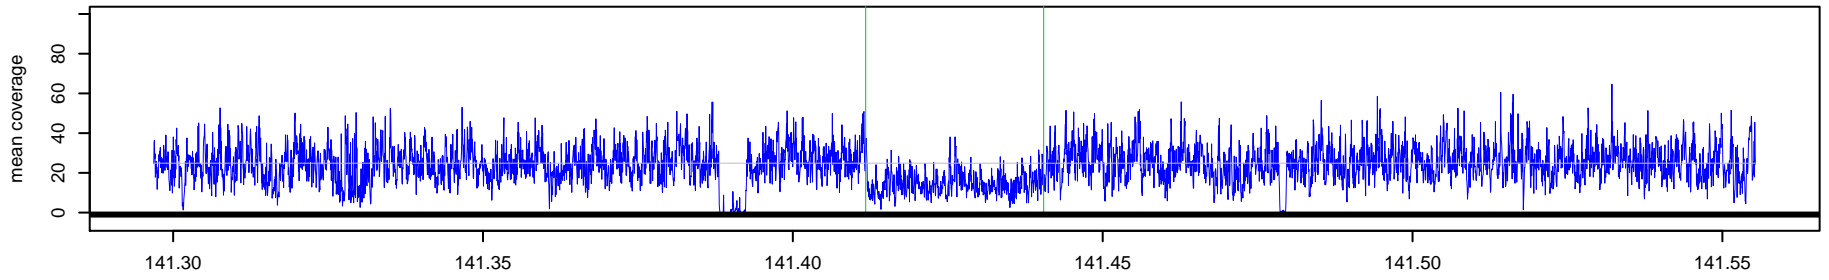

331 \_ NA10851 Chr 7 : 141411755 – 141440474 , 28720 bp (aCGH relative log2ratio= -0.78 )

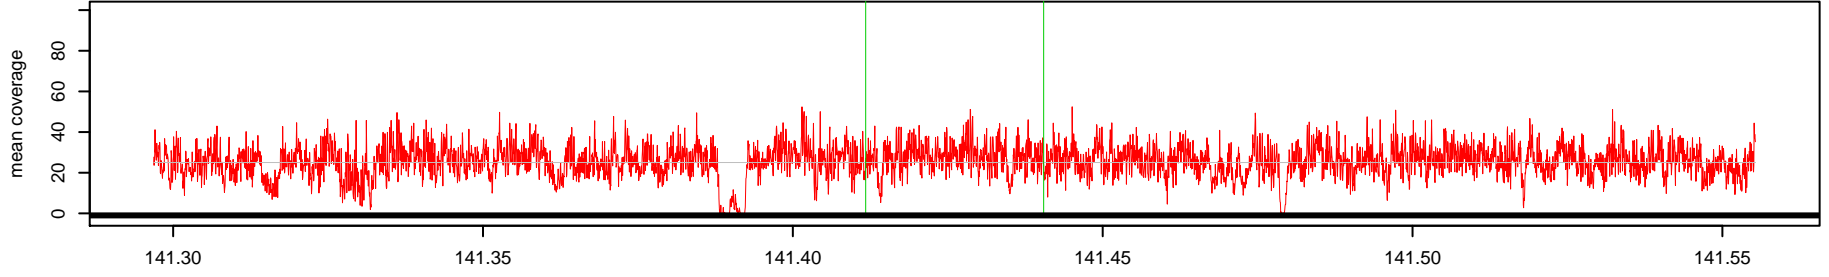

Log2( AK1 read depth / NA10851 read depth)

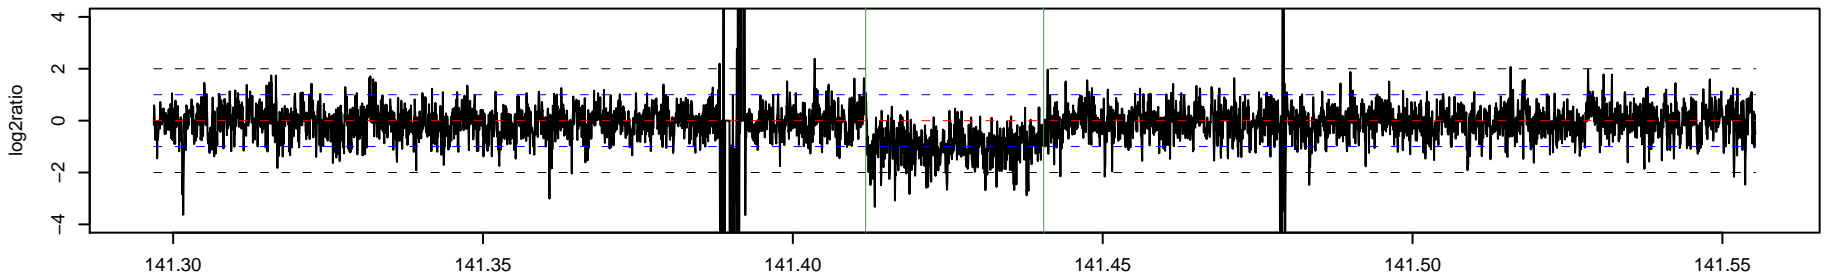

332 \_ AK1 Chr 7 : 142153065 – 142173345 , 20281 bp (aCGH relative log2ratio= -1.14 )

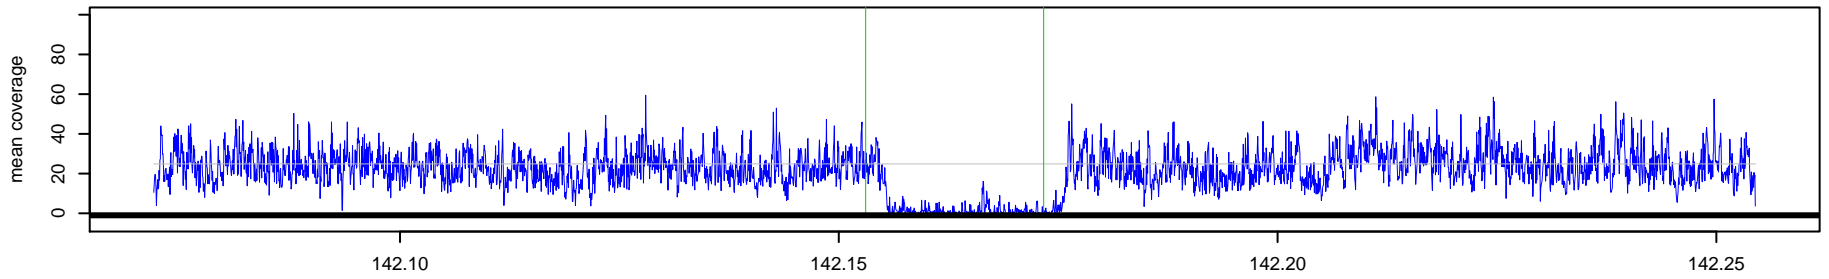

332 \_ NA10851 Chr 7 : 142153065 – 142173345 , 20281 bp (aCGH relative log2ratio= -1.14 )

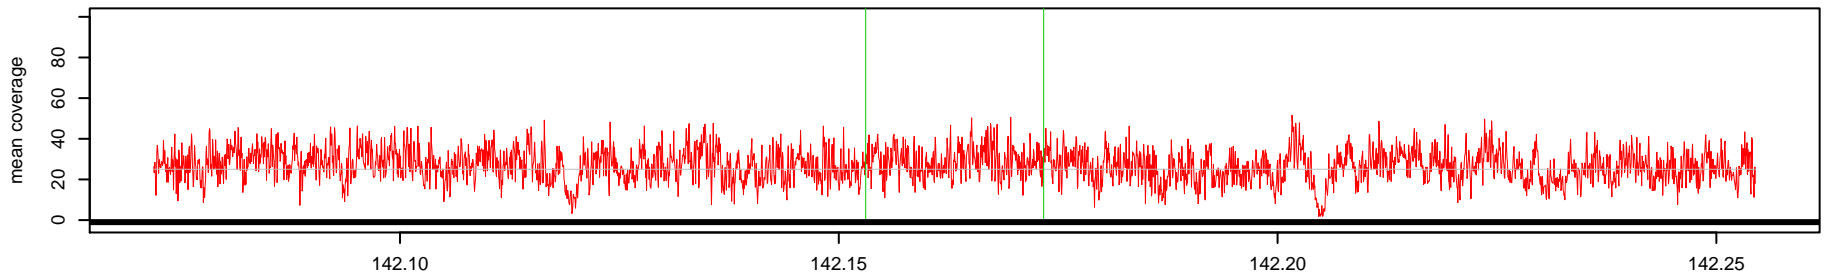

Log2( AK1 read depth / NA10851 read depth)

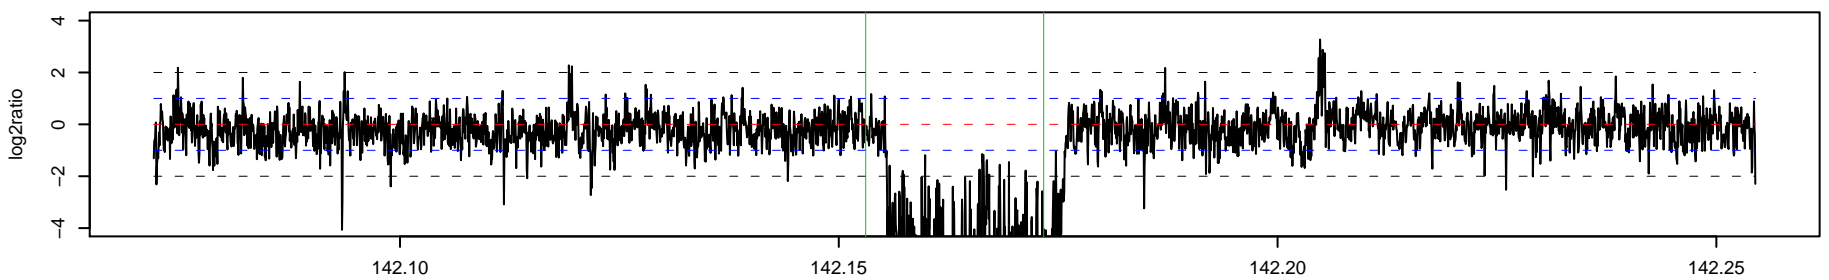

333 \_ AK1 Chr 7 : 142194152 – 142194589 , 438 bp (aCGH relative log2ratio= -0.65 )

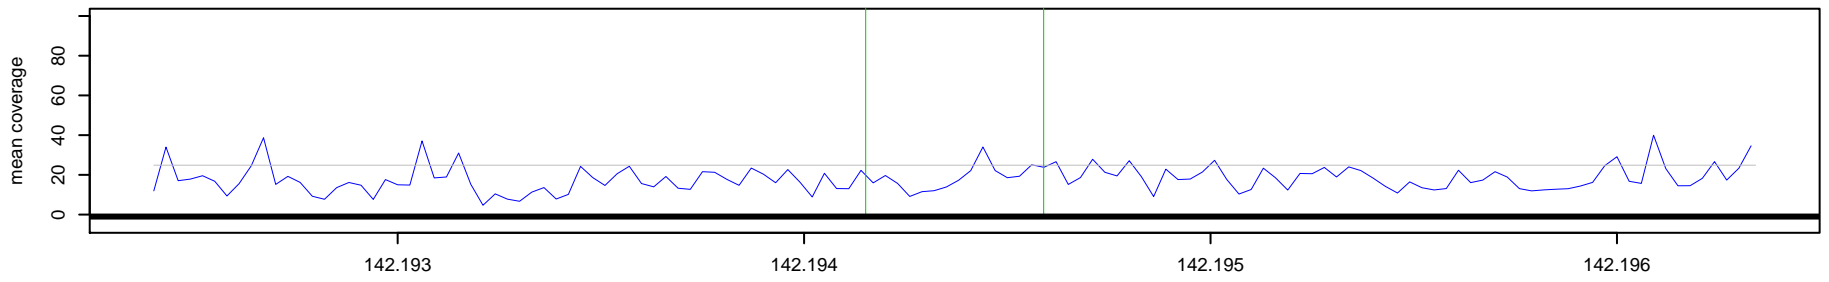

333 \_ NA10851 Chr 7 : 142194152 – 142194589 , 438 bp (aCGH relative log2ratio= -0.65 )

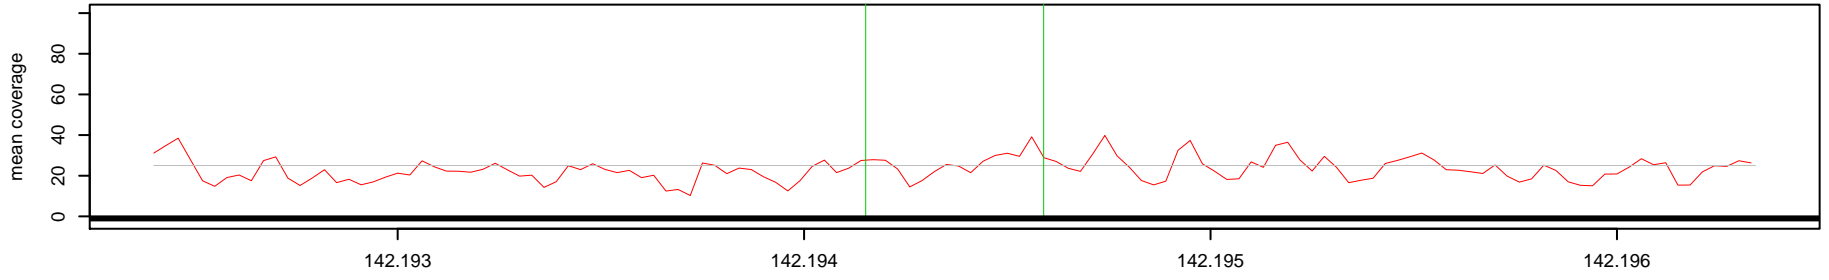

Log2( AK1 read depth / NA10851 read depth)

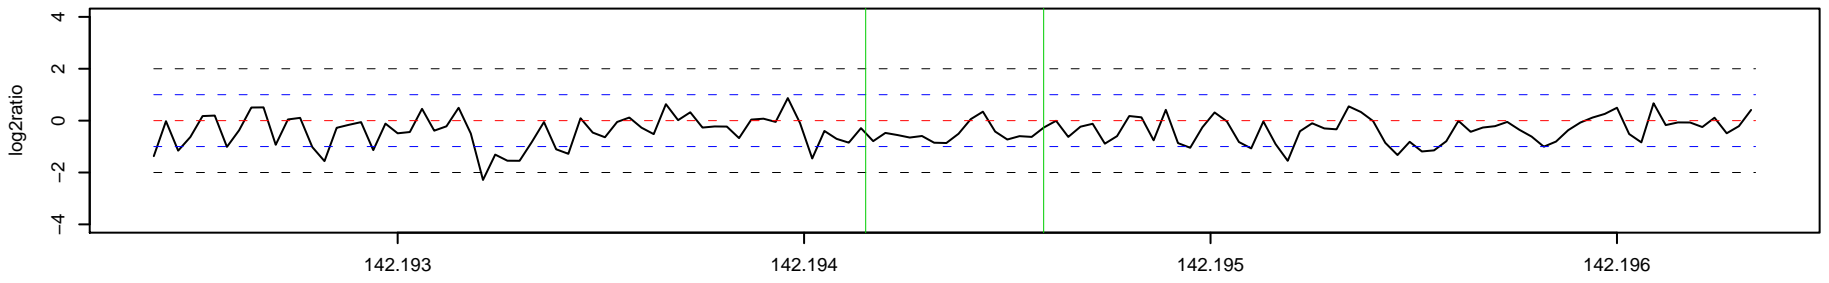

334 \_ AK1 Chr 7 : 142362284 – 142362725 , 442 bp (aCGH relative log2ratio= 0.50 )

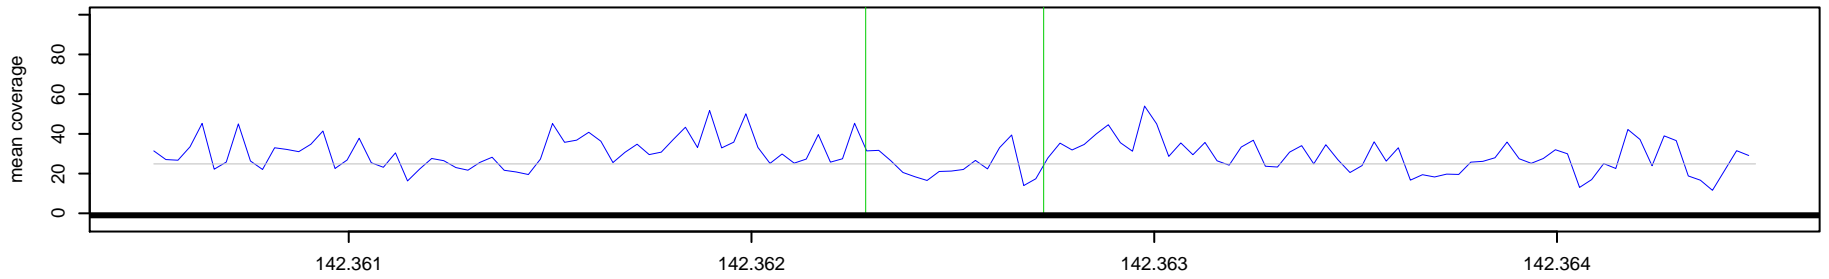

334 \_ NA10851 Chr 7 : 142362284 – 142362725 , 442 bp (aCGH relative log2ratio= 0.50 )

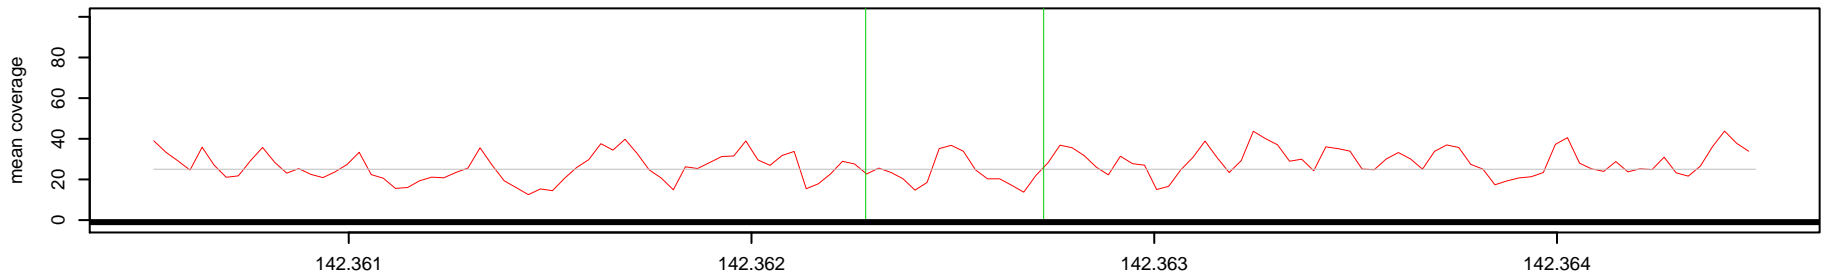

Log2( AK1 read depth / NA10851 read depth)

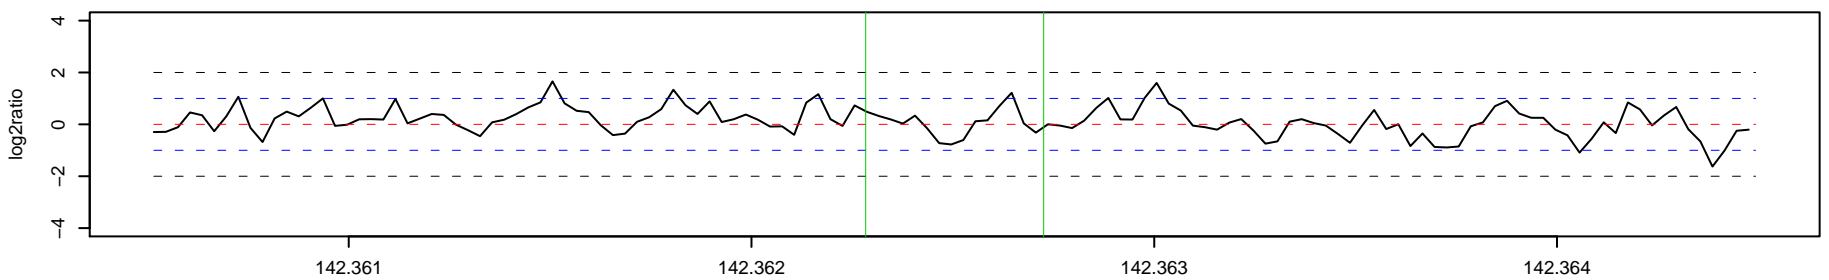

335 \_ AK1 Chr 7 : 143056107 – 143065611 , 9505 bp (aCGH relative log2ratio= 0.57 )

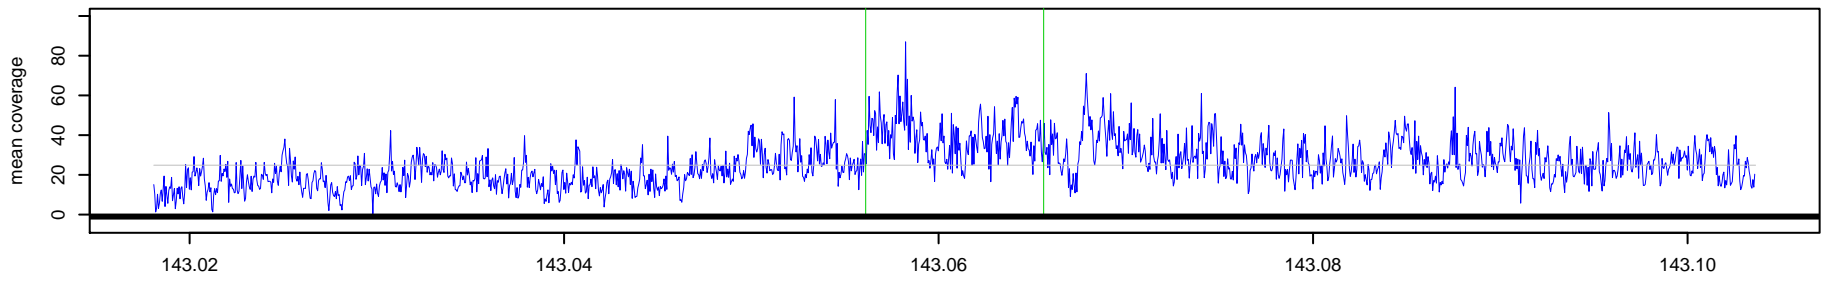

335 \_ NA10851 Chr 7 : 143056107 – 143065611 , 9505 bp (aCGH relative log2ratio= 0.57 )

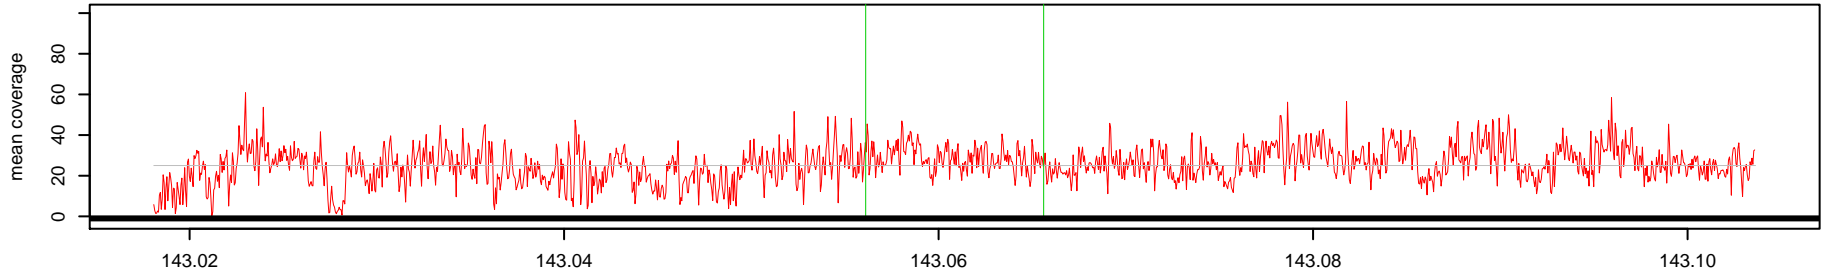

Log2( AK1 read depth / NA10851 read depth)

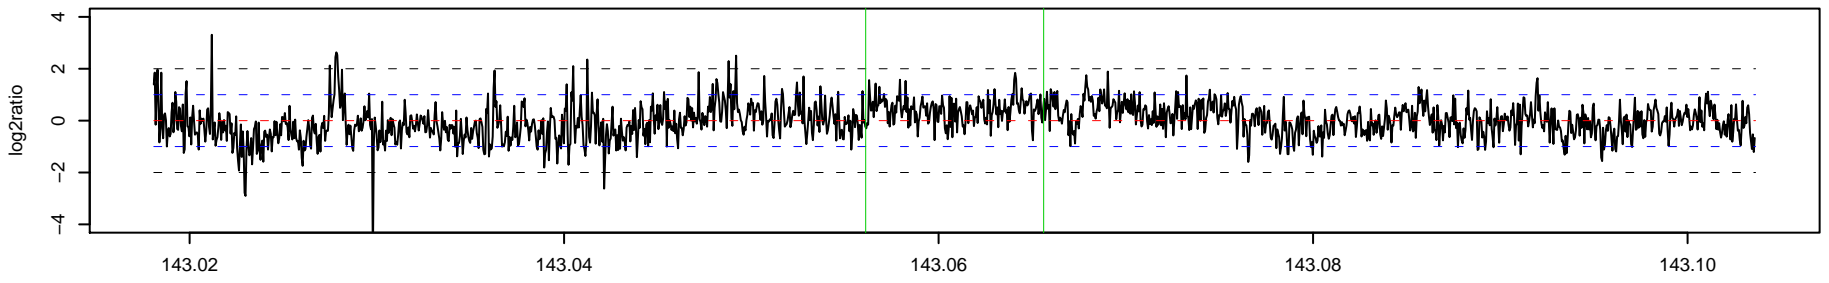

336 \_ AK1 Chr 7 : 146652027 – 146652564 , 538 bp (aCGH relative log2ratio= -0.84 )

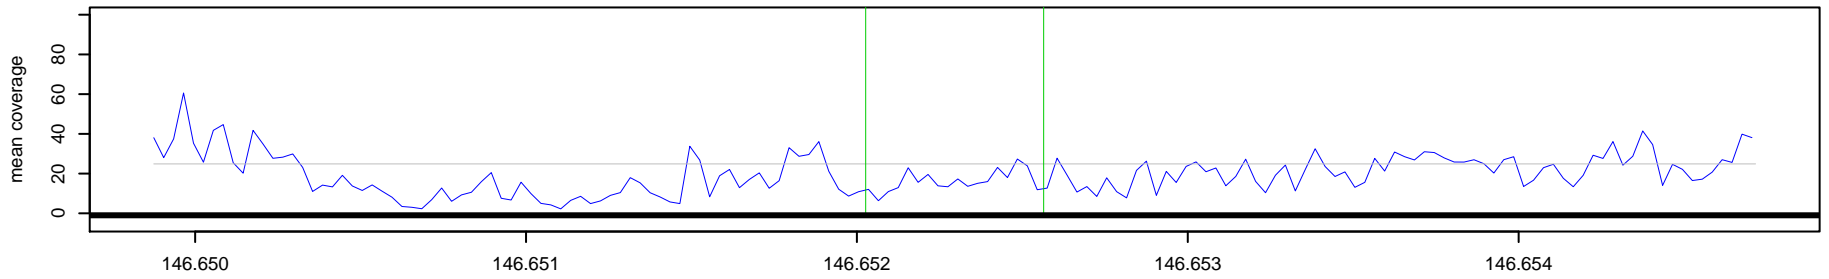

336 \_ NA10851 Chr 7 : 146652027 – 146652564 , 538 bp (aCGH relative log2ratio= -0.84 )

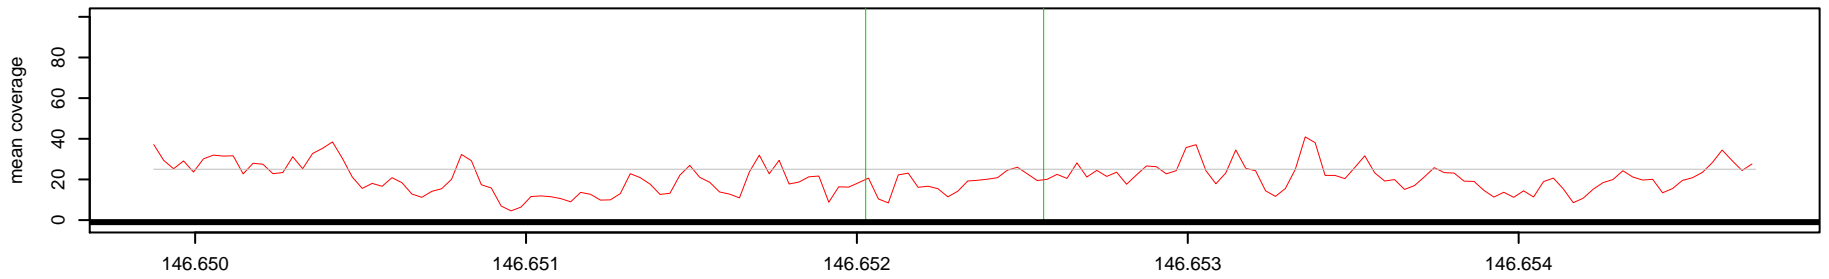

Log2( AK1 read depth / NA10851 read depth)

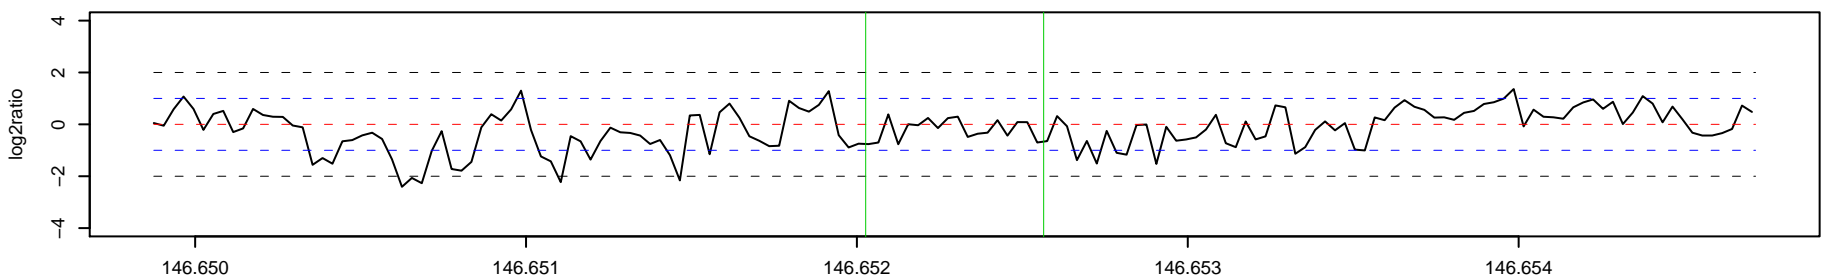

337 \_ AK1 Chr 7 : 147169831 – 147170512 , 682 bp (aCGH relative log2ratio= 0.62 )

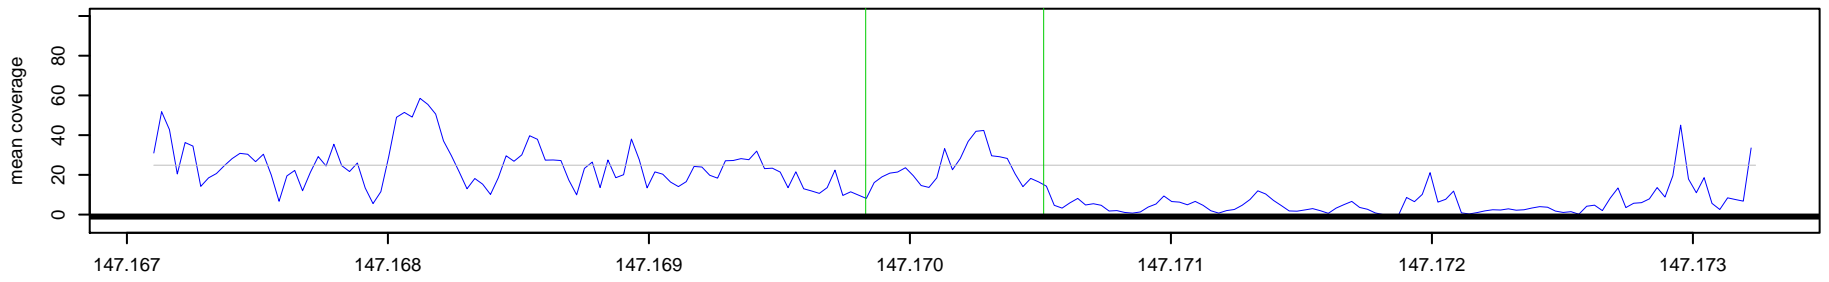

337 \_ NA10851 Chr 7 : 147169831 – 147170512 , 682 bp (aCGH relative log2ratio= 0.62 )

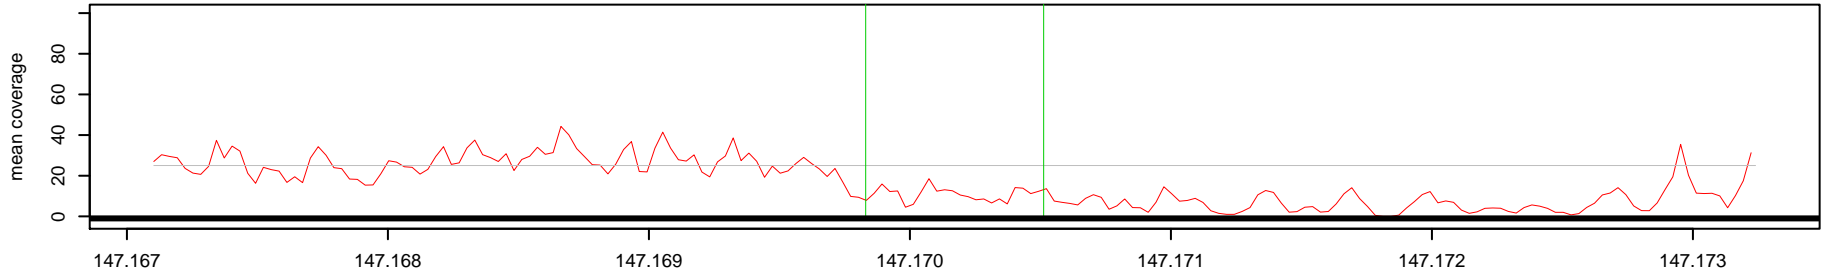

Log2( AK1 read depth / NA10851 read depth)

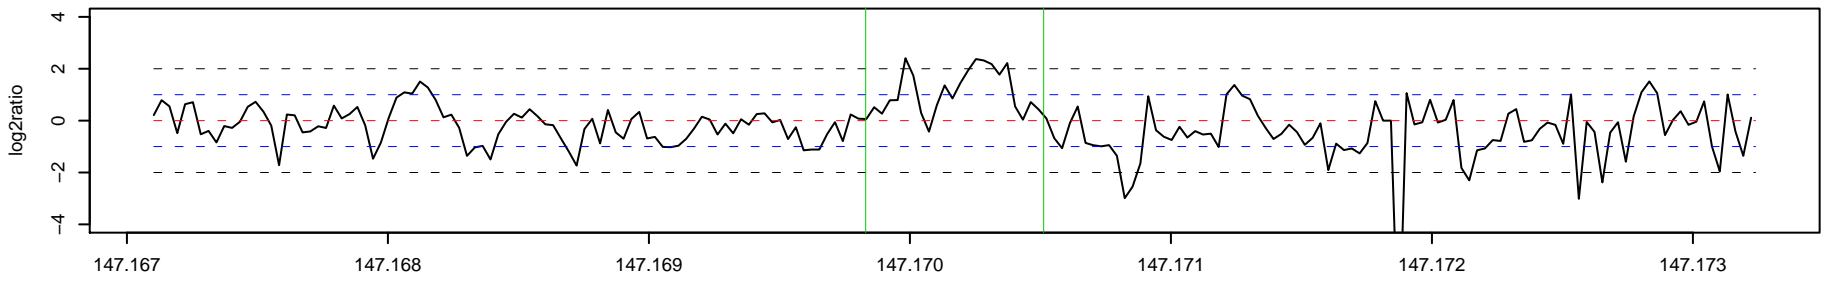

338 \_ AK1 Chr 7 : 147704152 – 147706162 , 2011 bp (aCGH relative log2ratio= 3.26 )

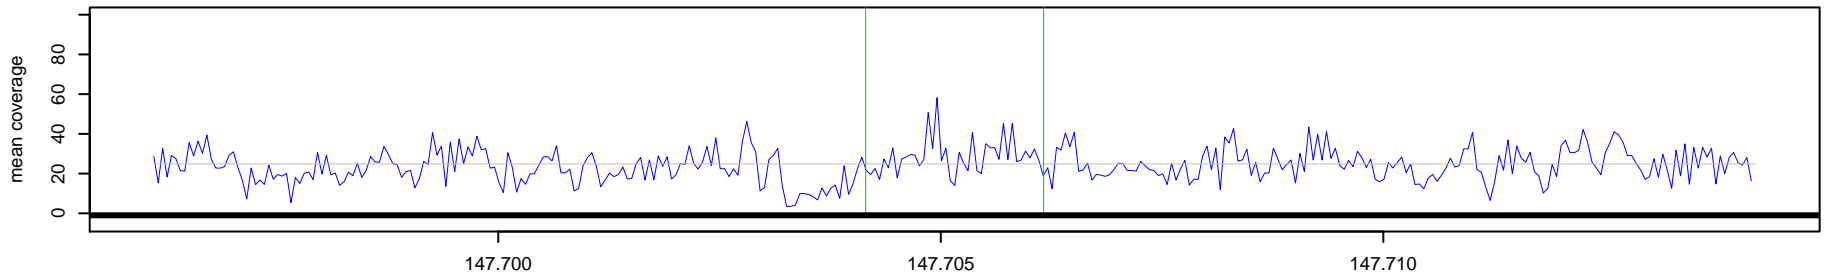

338 \_ NA10851 Chr 7 : 147704152 – 147706162 , 2011 bp (aCGH relative log2ratio= 3.26 )

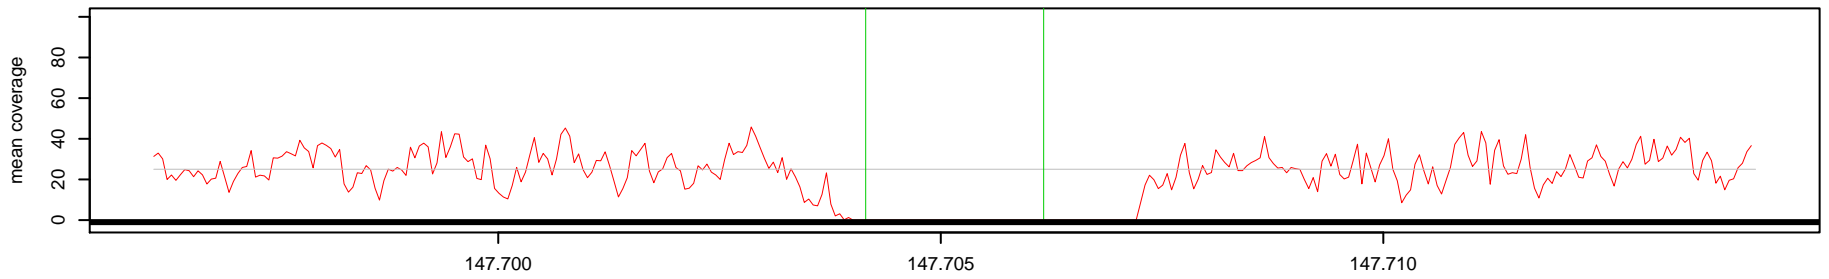

Log2( AK1 read depth / NA10851 read depth)

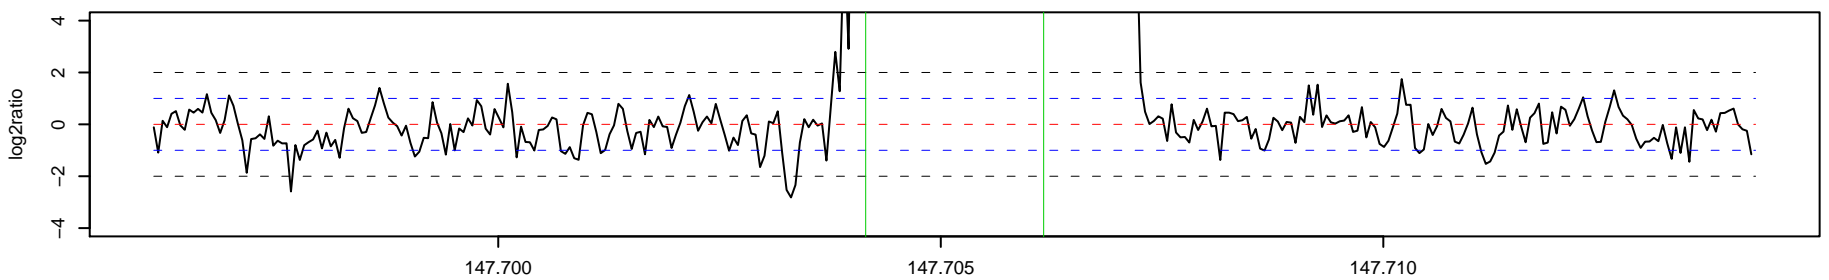

339\_AK1 Chr 7 : 151572896 – 151577886 , 4991 bp (aCGH relative log2ratio= 0.59 )

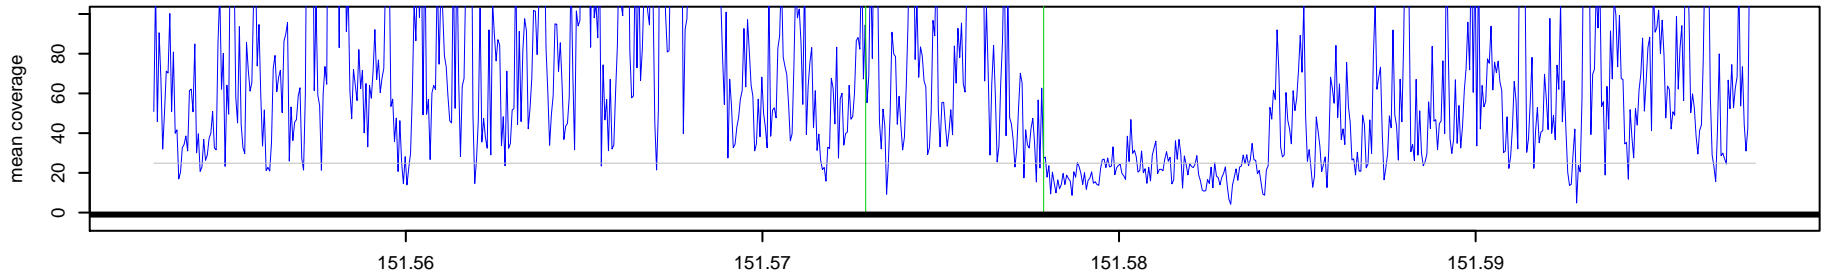

339\_NA10851 Chr 7 : 151572896 – 151577886 , 4991 bp (aCGH relative log2ratio= 0.59 )

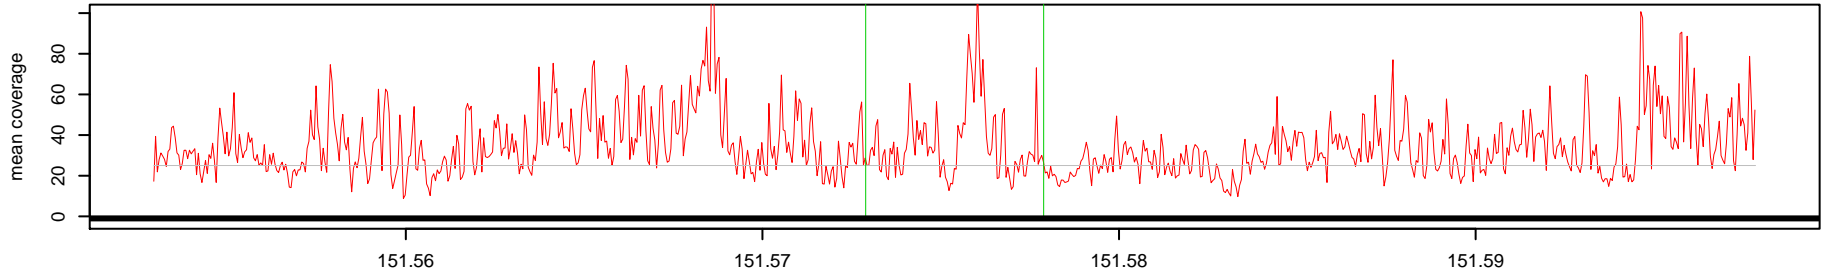

Log2( AK1 read depth / NA10851 read depth)

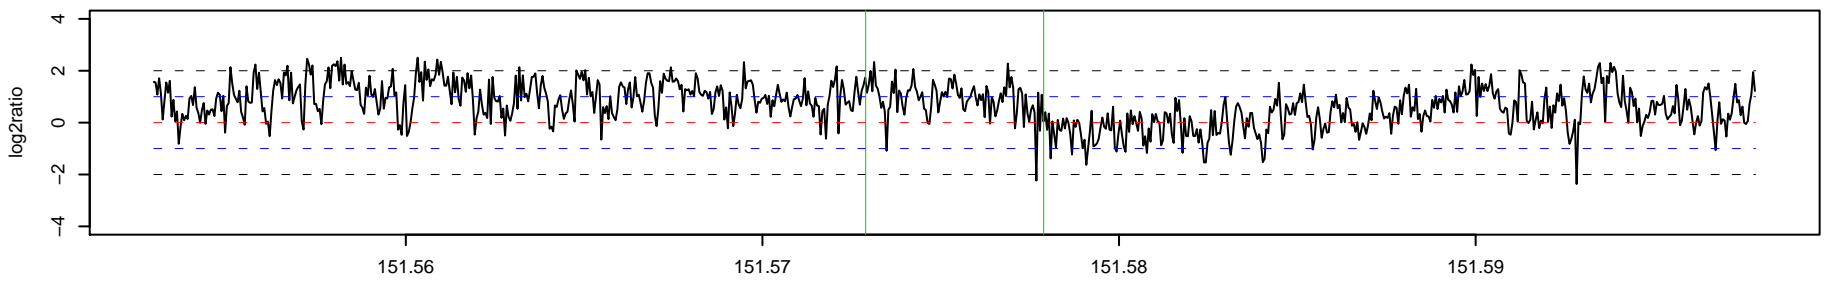

340\_AK1 Chr 7 : 158810289 – 158815588 , 5300 bp (aCGH relative log2ratio= 0.50 )

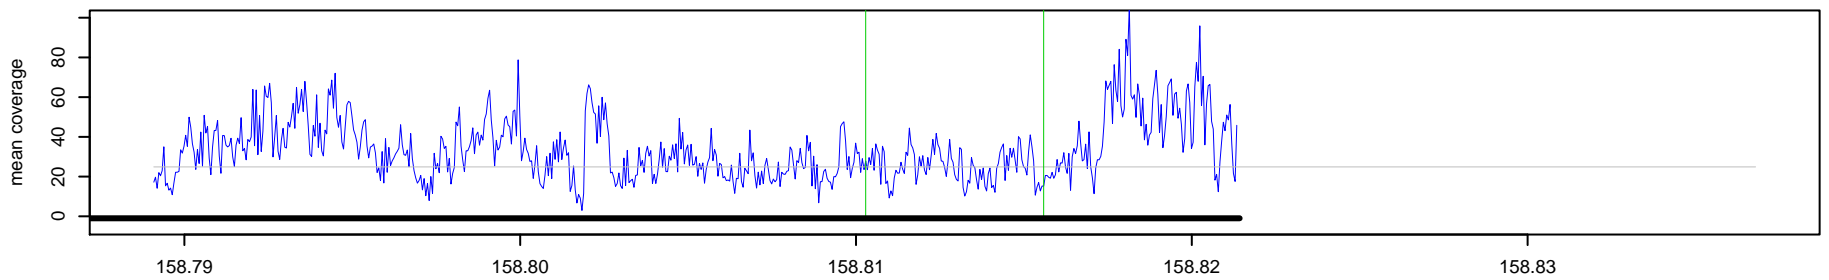

340\_NA10851 Chr 7 : 158810289 – 158815588 , 5300 bp (aCGH relative log2ratio= 0.50 )

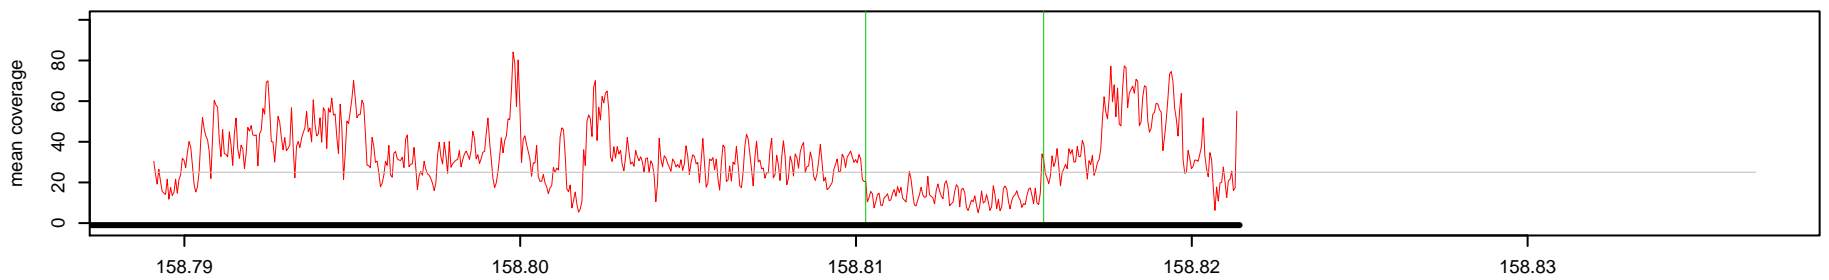

Log2( AK1 read depth / NA10851 read depth)

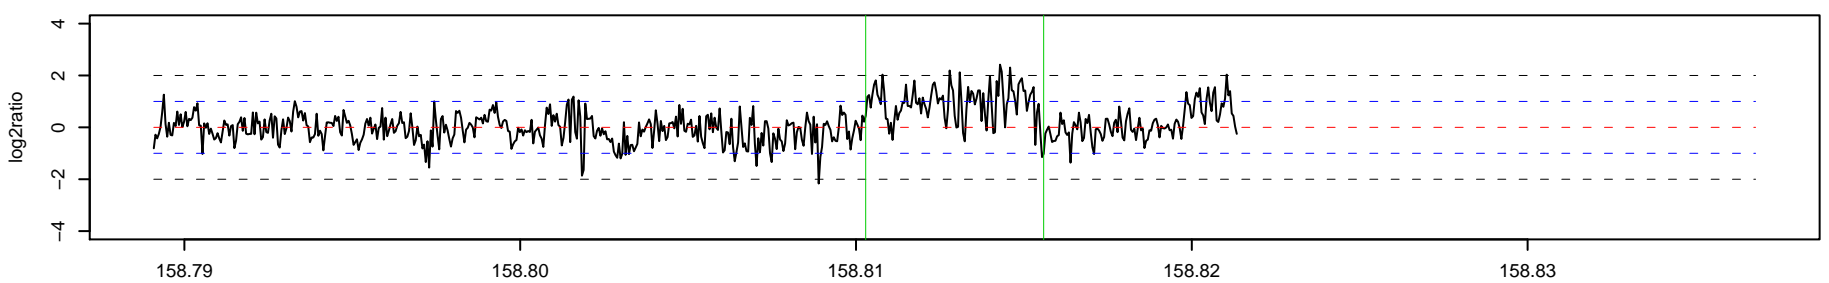

341 \_ AK1 Chr 8 : 584782 – 589393 , 4612 bp (aCGH relative log2ratio= 0.82 )

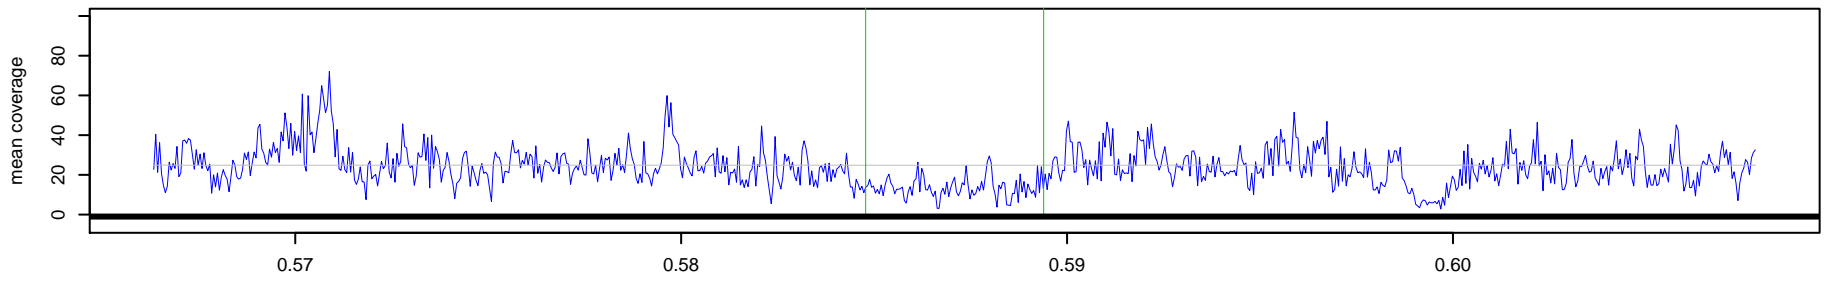

341 \_ NA10851 Chr 8 : 584782 – 589393 , 4612 bp (aCGH relative log2ratio= 0.82 )

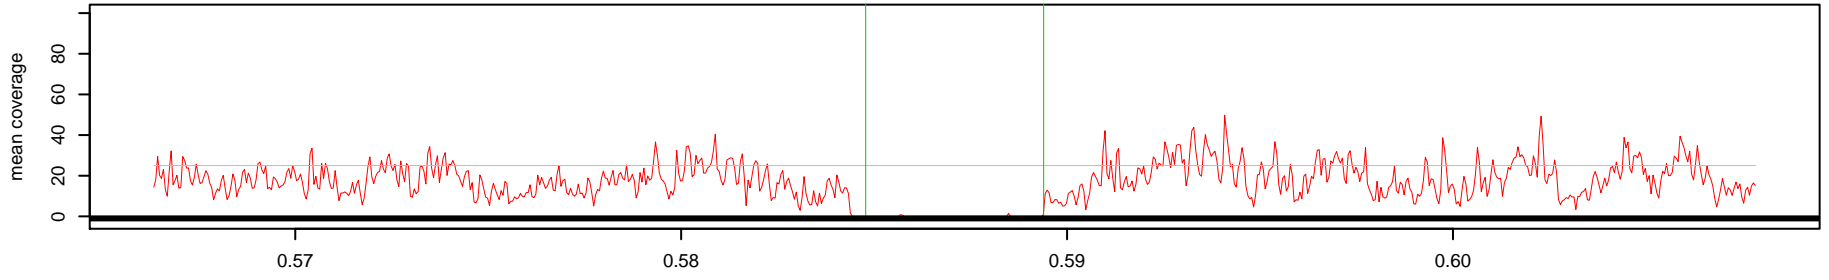

Log2( AK1 read depth / NA10851 read depth)

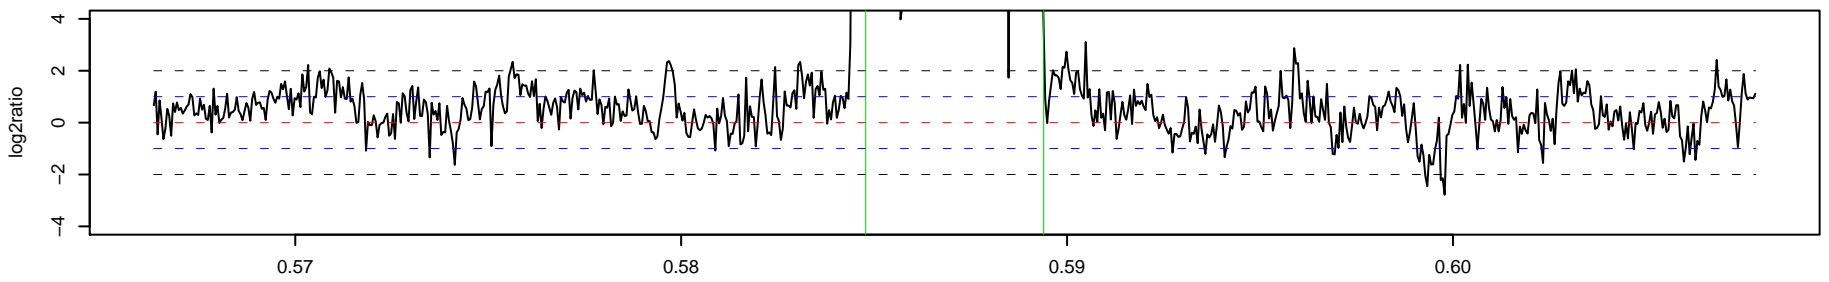

o

o

342 \_ AK1 Chr 8 : 1328210 – 1342078 , 13869 bp (aCGH relative log2ratio= -0.83 )

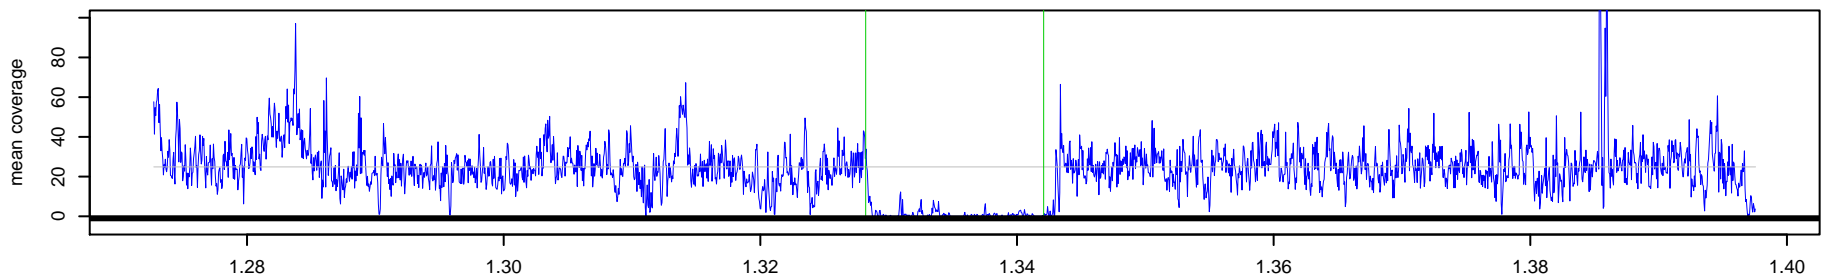

342 \_ NA10851 Chr 8 : 1328210 – 1342078 , 13869 bp (aCGH relative log2ratio= -0.83 )

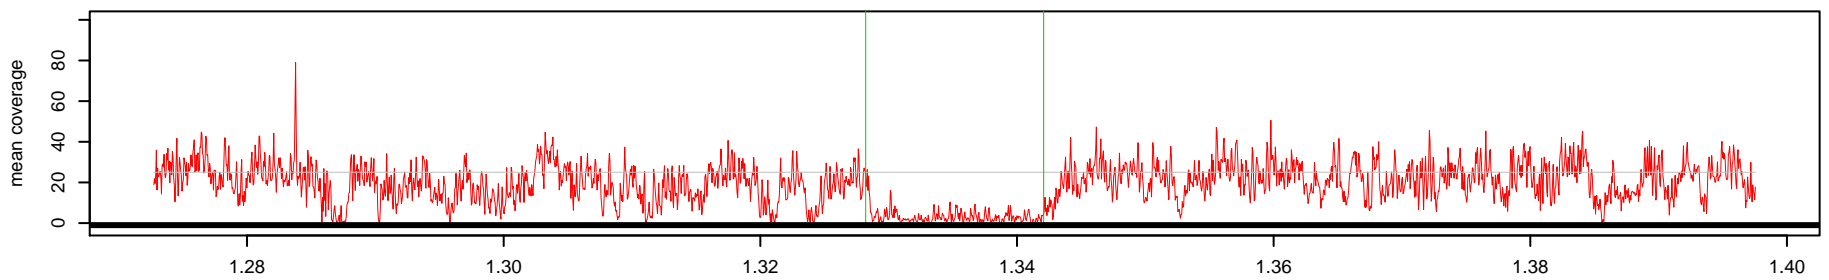

Log2( AK1 read depth / NA10851 read depth)

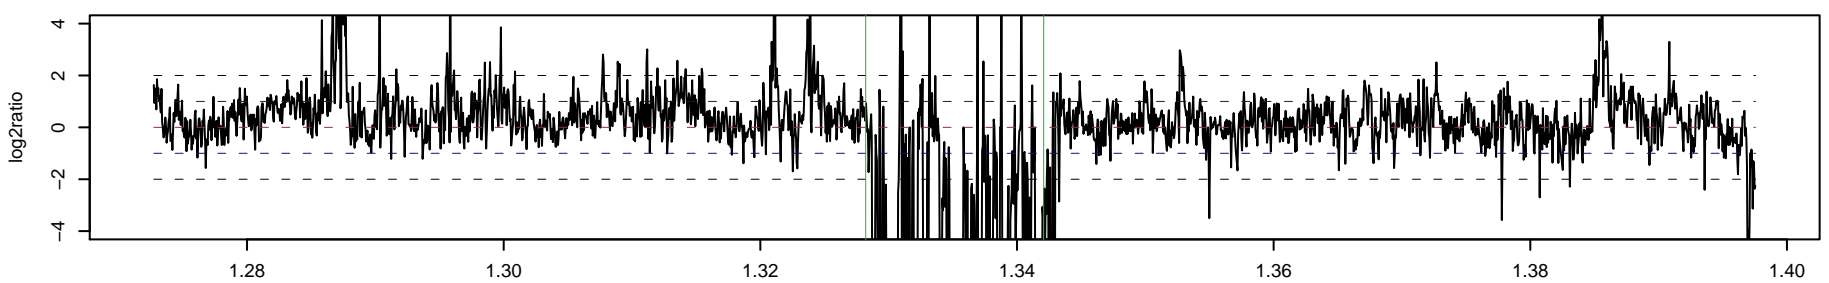

343\_AK1 Chr 8 : 1822922 – 1826232 , 3311 bp (aCGH relative log2ratio= -0.62 )

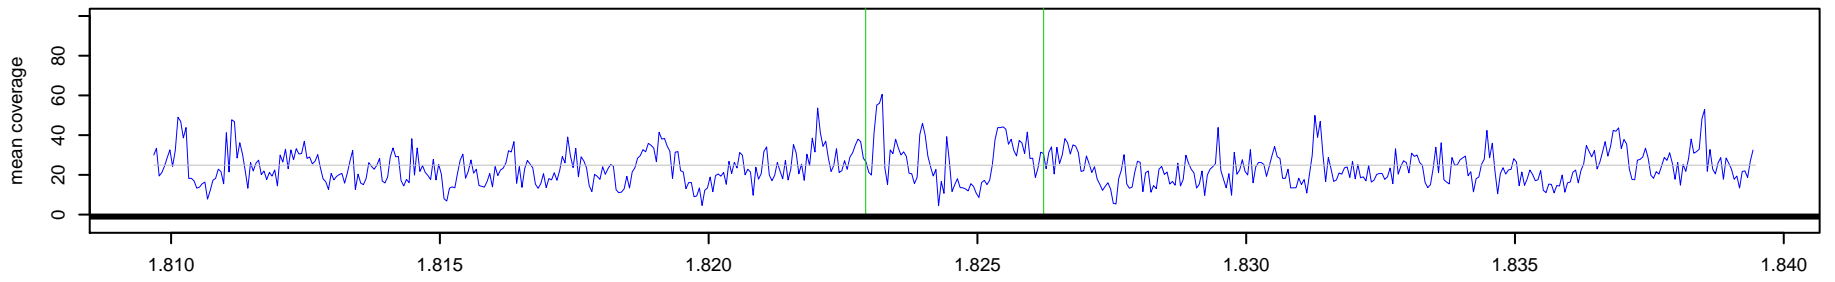

343\_NA10851 Chr 8 : 1822922 – 1826232 , 3311 bp (aCGH relative log2ratio= -0.62 )

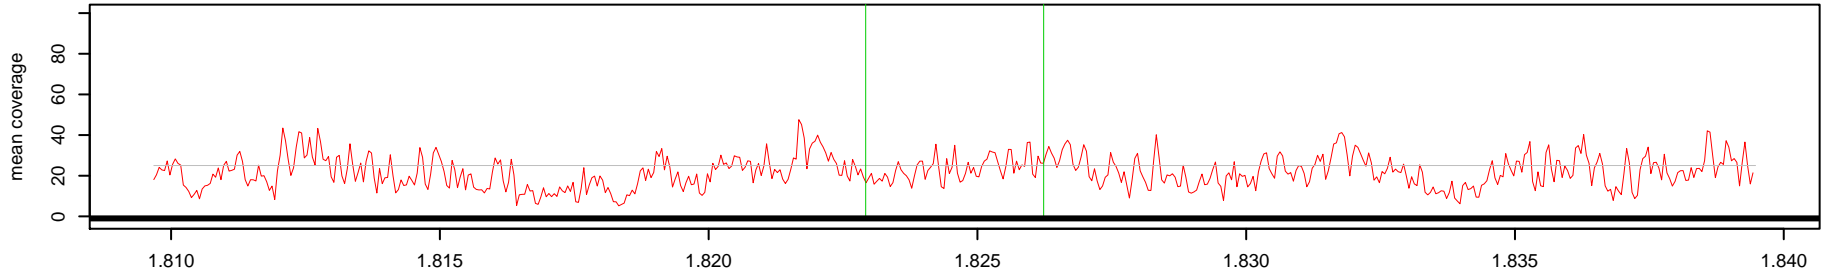

Log2( AK1 read depth / NA10851 read depth)

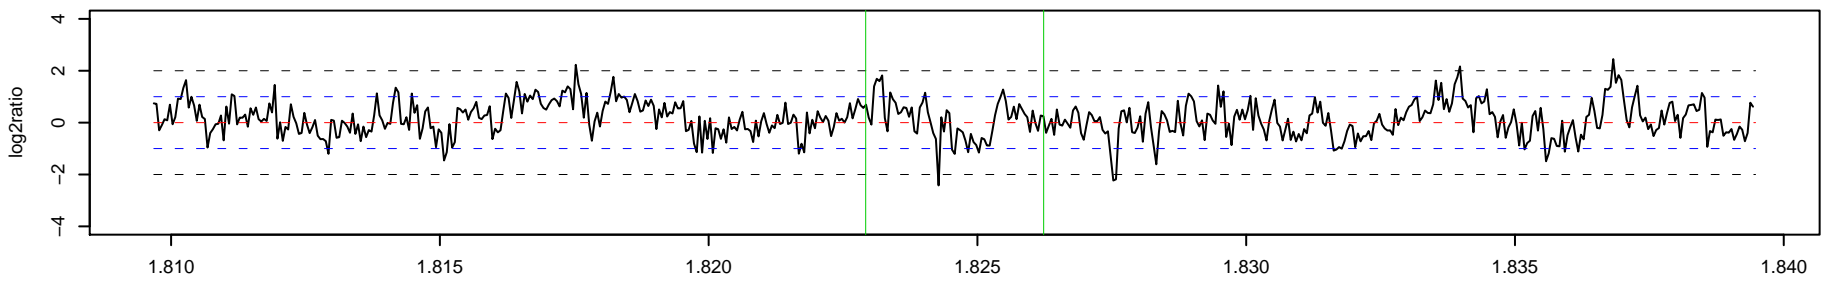

344\_AK1 Chr 8 : 2234243 – 2251211 , 16969 bp (aCGH relative log2ratio= 0.87 )

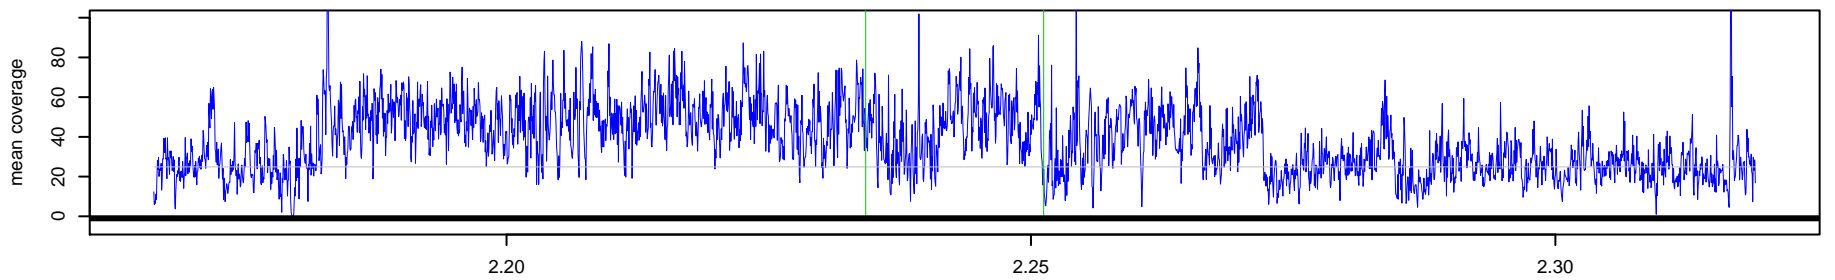

344\_NA10851 Chr 8 : 2234243 – 2251211 , 16969 bp (aCGH relative log2ratio= 0.87 )

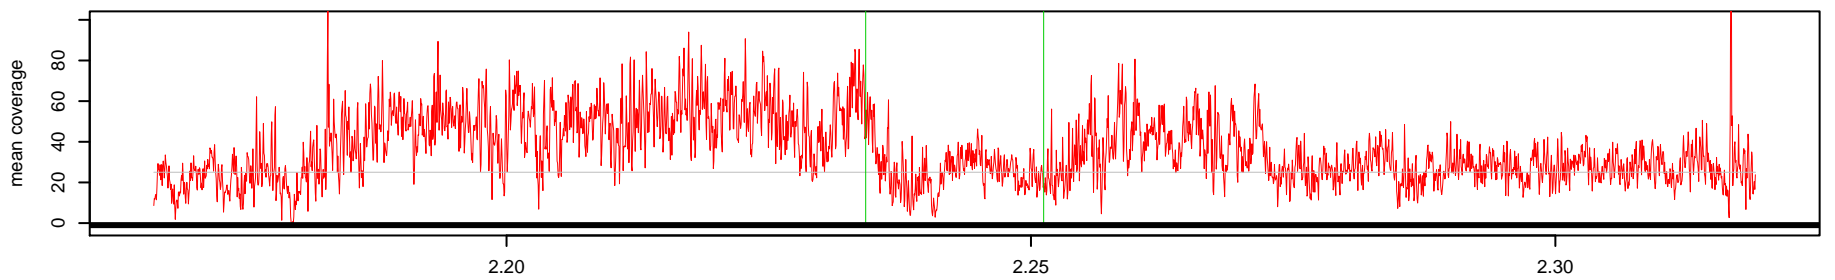

Log2( AK1 read depth / NA10851 read depth)

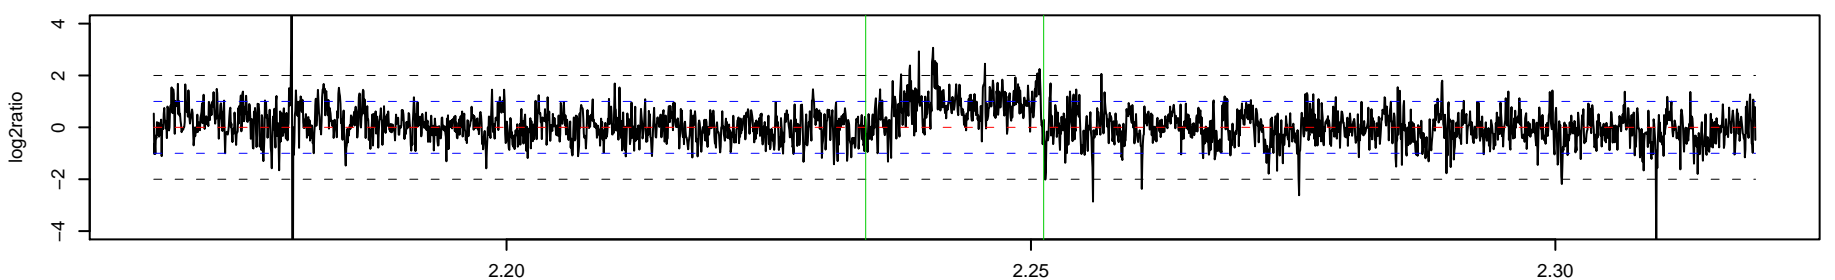



345\_AK1 Chr 8 : 4110288 – 4112295 , 2008 bp (aCGH relative log2ratio= 1.85 )

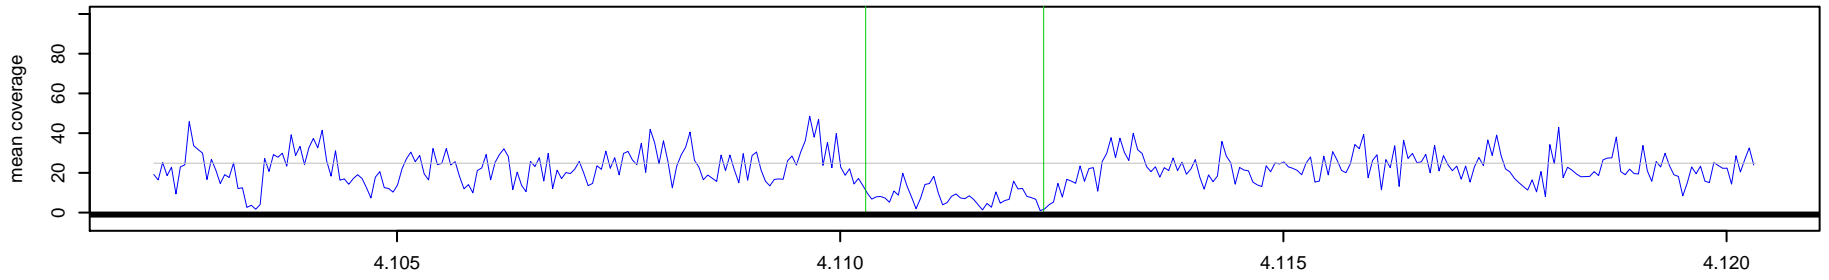

345\_NA10851 Chr 8 : 4110288 – 4112295 , 2008 bp (aCGH relative log2ratio= 1.85 )

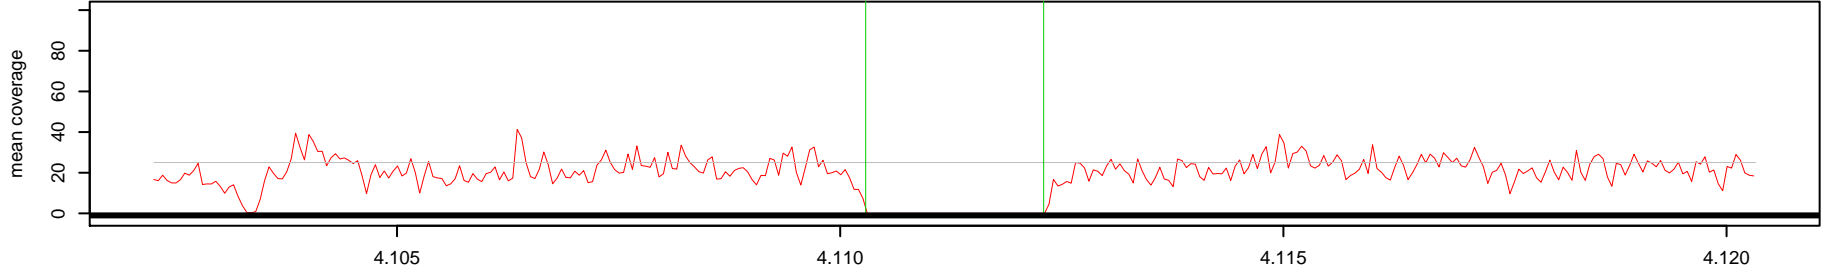

Log2( AK1 read depth / NA10851 read depth)

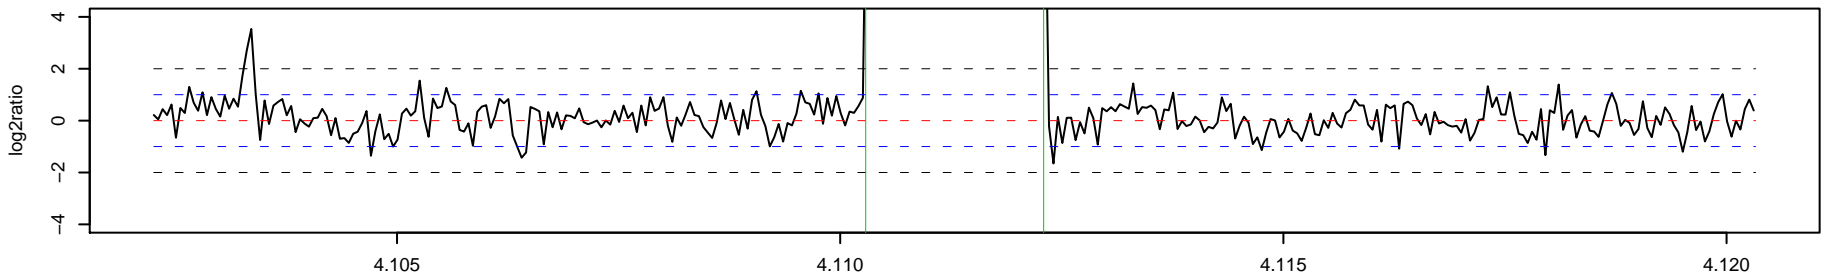

346\_AK1 Chr 8 : 4587689 – 4588273 , 585 bp (aCGH relative log2ratio= 0.52 )

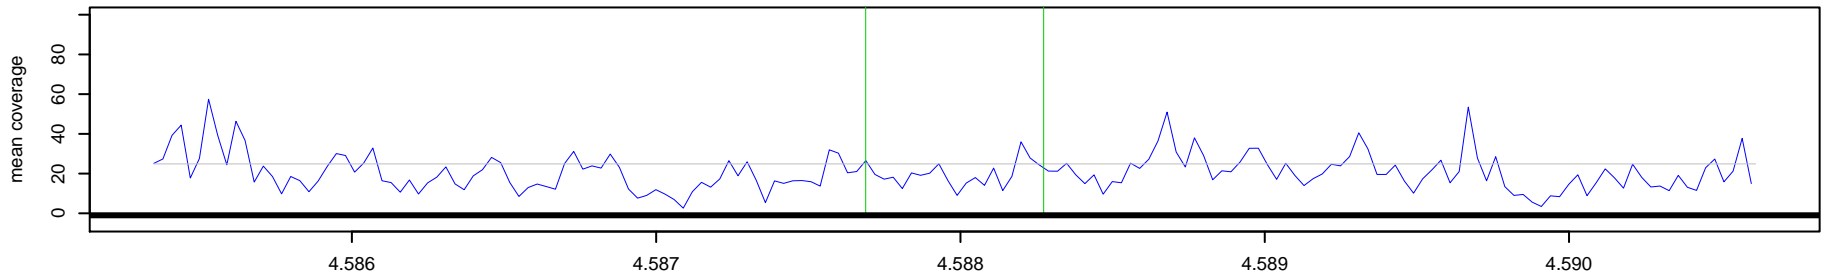

346\_NA10851 Chr 8 : 4587689 – 4588273 , 585 bp (aCGH relative log2ratio= 0.52 )

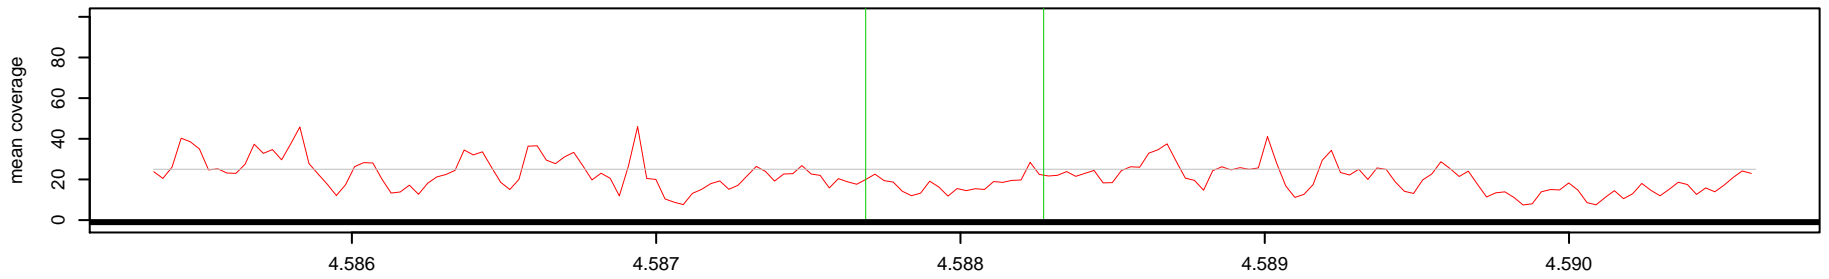

Log2( AK1 read depth / NA10851 read depth)

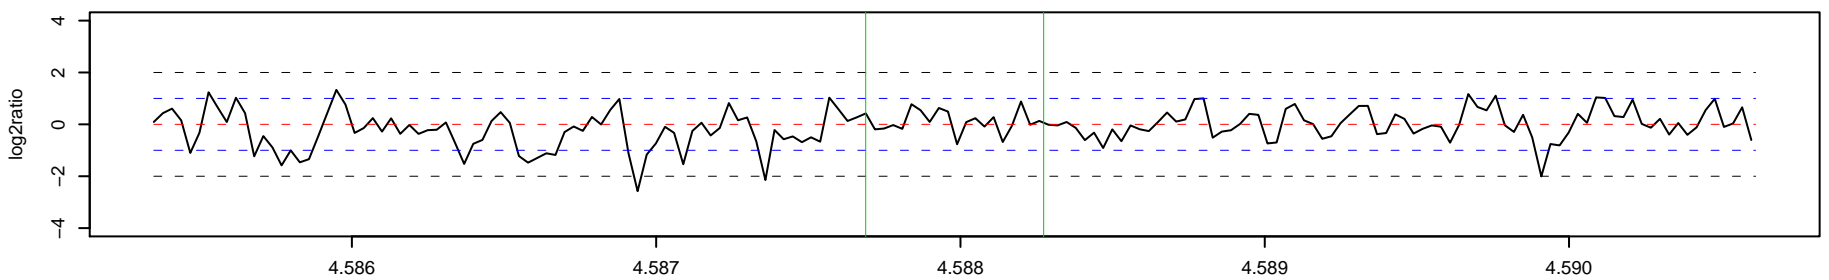

347\_AK1 Chr 8 : 5582933 – 5593322 , 10390 bp (aCGH relative log2ratio= 0.75 )

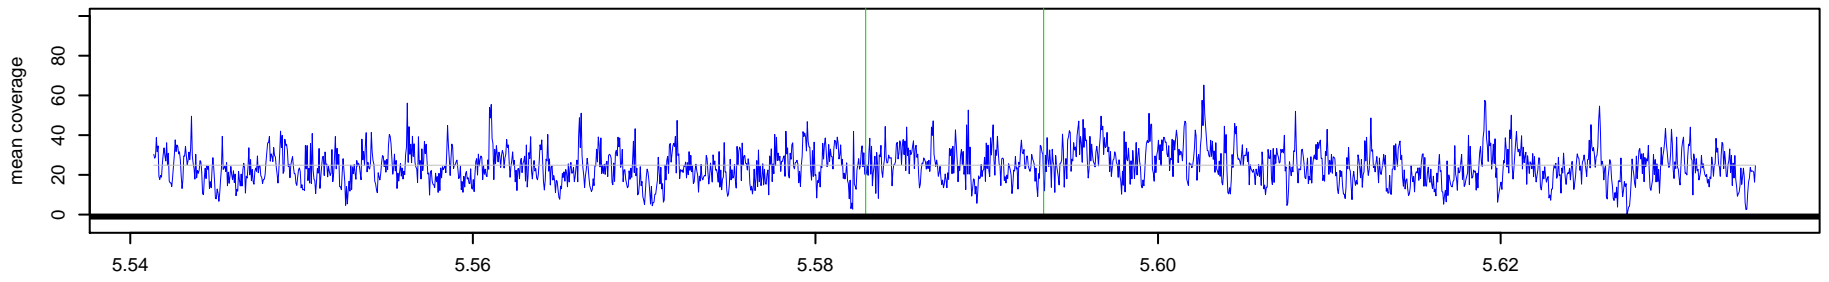

347\_NA10851 Chr 8 : 5582933 – 5593322 , 10390 bp (aCGH relative log2ratio= 0.75 )

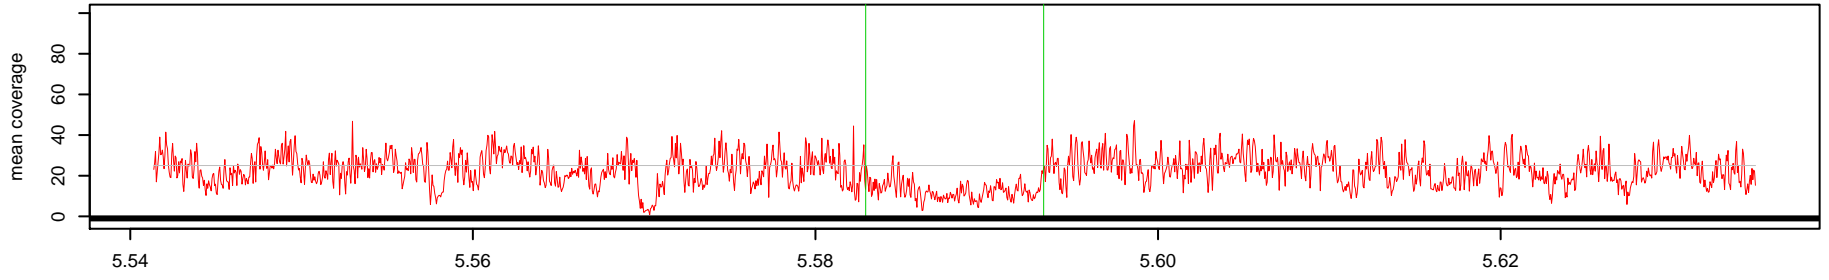

Log2( AK1 read depth / NA10851 read depth)

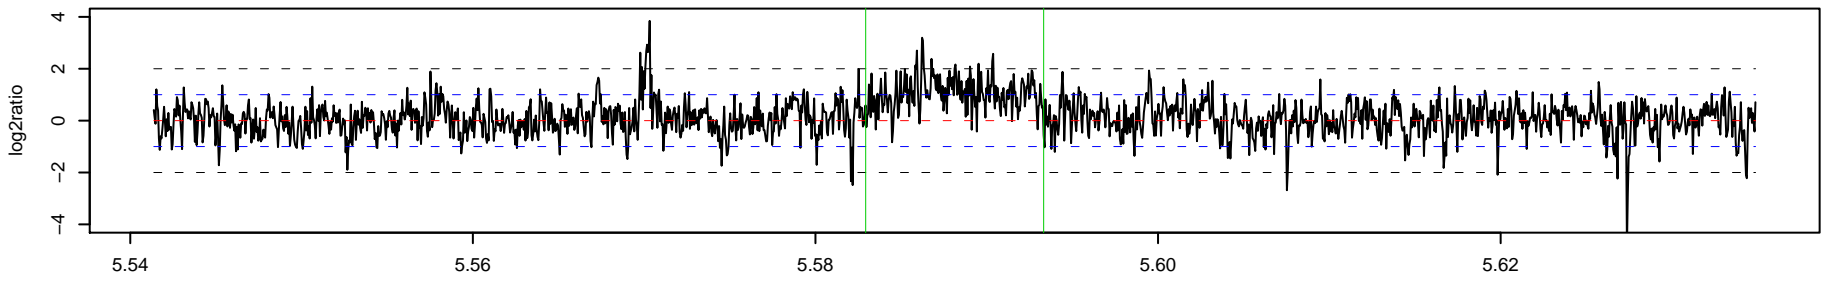

348\_AK1 Chr 8 : 5715393 – 5716743 , 1351 bp (aCGH relative log2ratio= -4.37 )

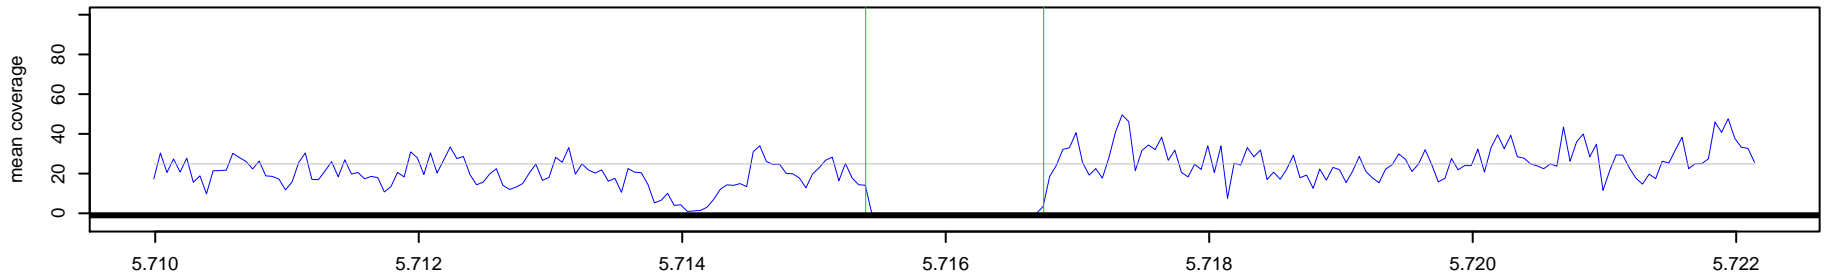

348\_NA10851 Chr 8 : 5715393 – 5716743 , 1351 bp (aCGH relative log2ratio= -4.37 )

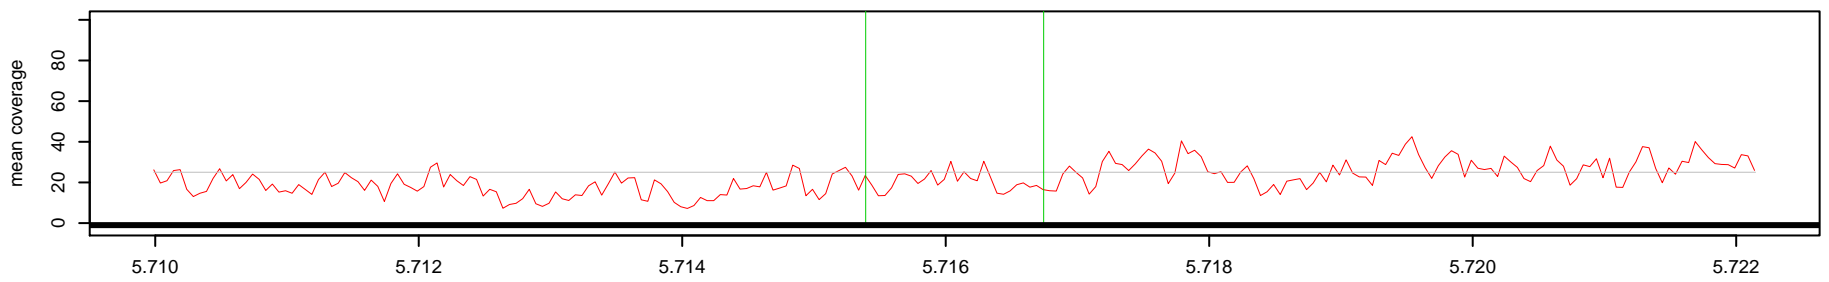

Log2( AK1 read depth / NA10851 read depth)

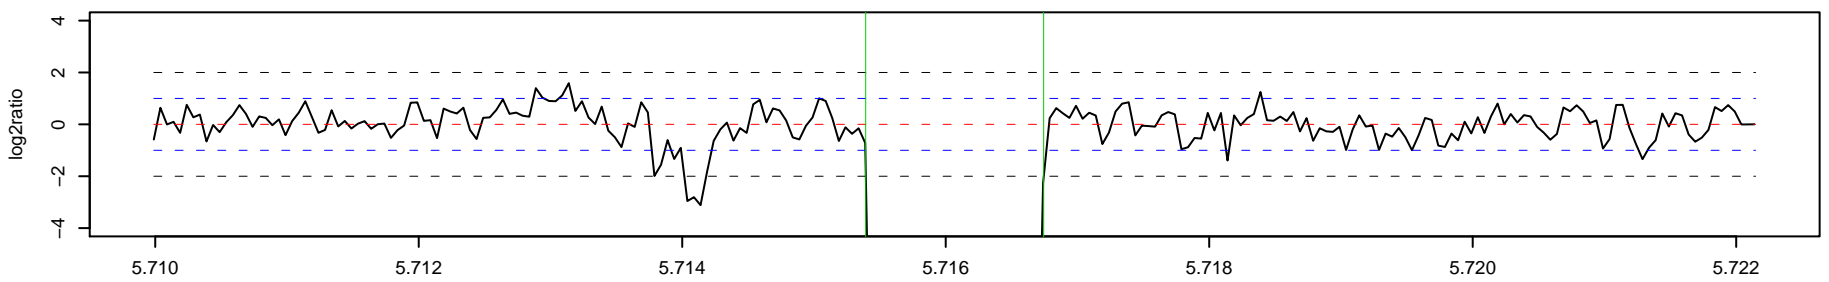

349\_AK1 Chr 8 : 8621153 – 8625231 , 4079 bp (aCGH relative log2ratio= 0.69 )

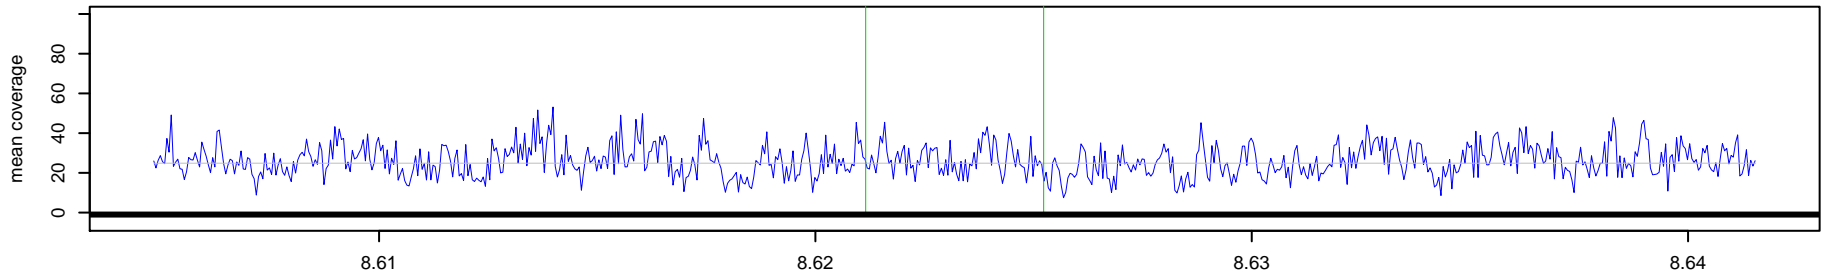

349\_NA10851 Chr 8 : 8621153 – 8625231 , 4079 bp (aCGH relative log2ratio= 0.69 )

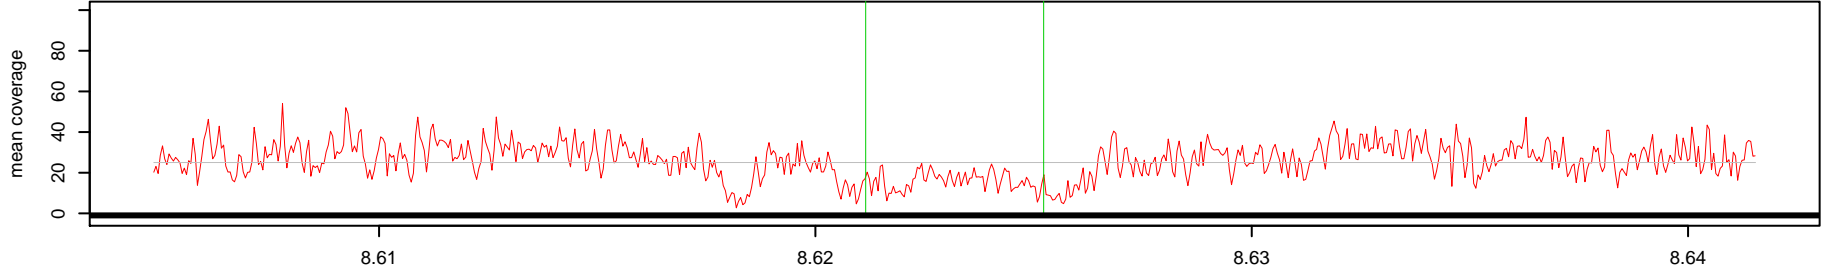

Log2( AK1 read depth / NA10851 read depth)

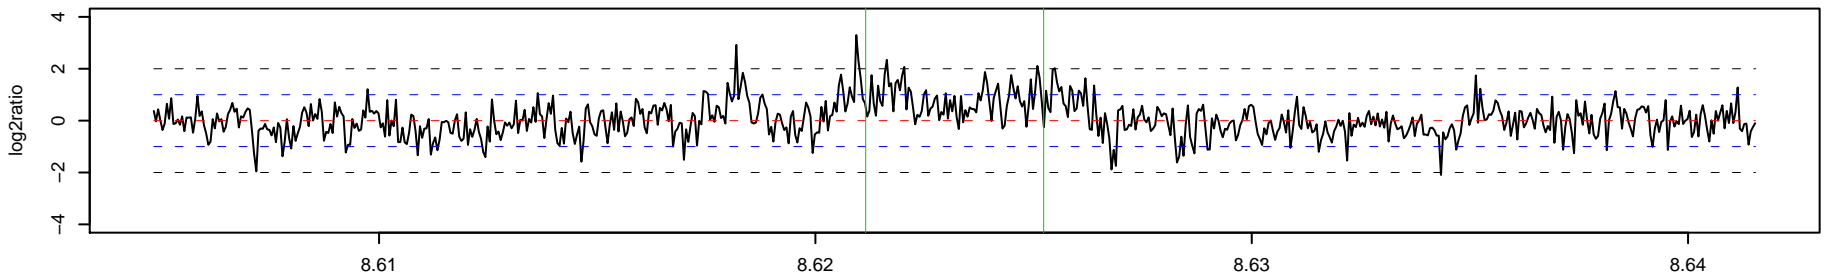

350\_AK1 Chr 8 : 9535188 – 9538231 , 3044 bp (aCGH relative log2ratio= -4.06 )

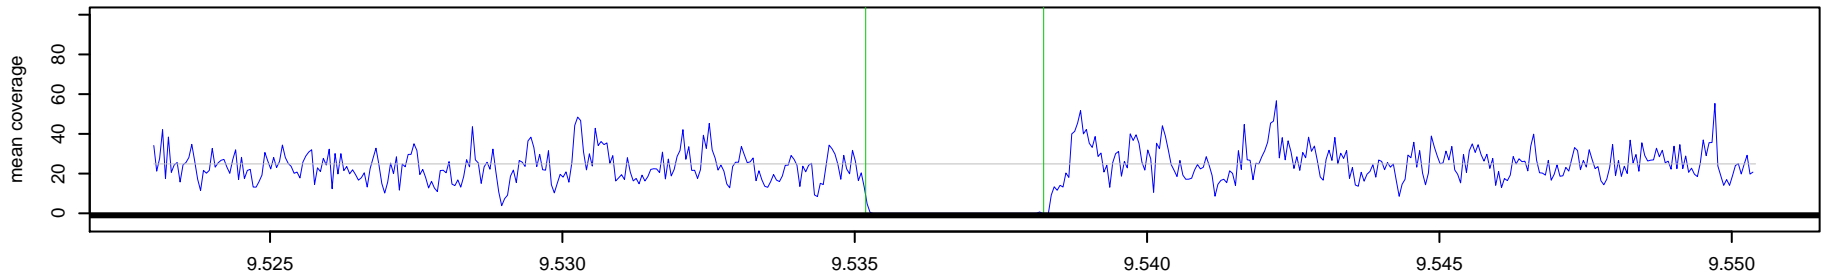

350\_NA10851 Chr 8 : 9535188 – 9538231 , 3044 bp (aCGH relative log2ratio= -4.06 )

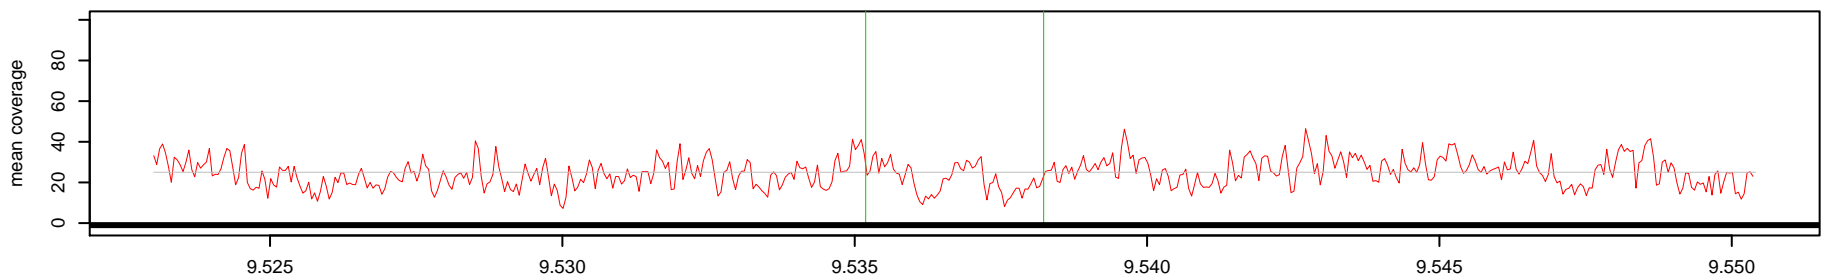

Log2( AK1 read depth / NA10851 read depth)

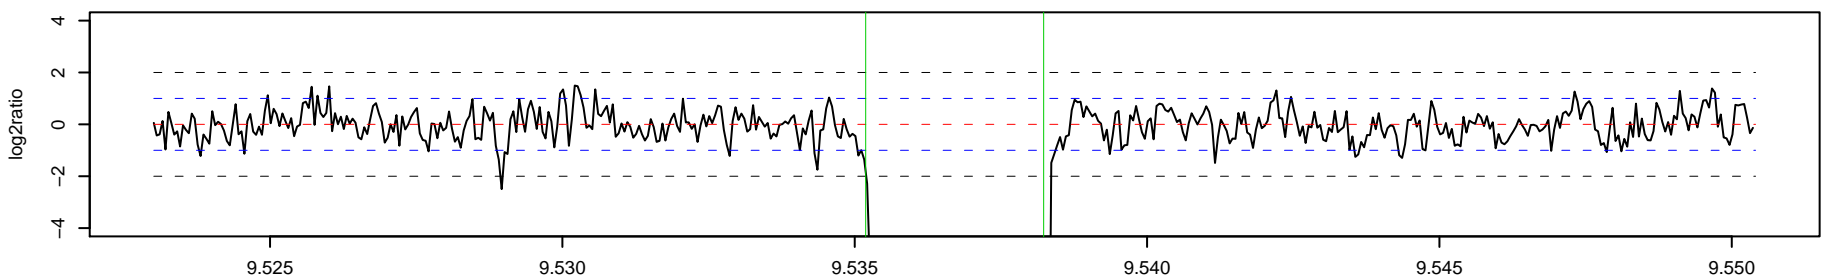

351 \_ AK1 Chr 8 : 14628254 – 14630529 , 2276 bp (aCGH relative log2ratio= 0.53 )

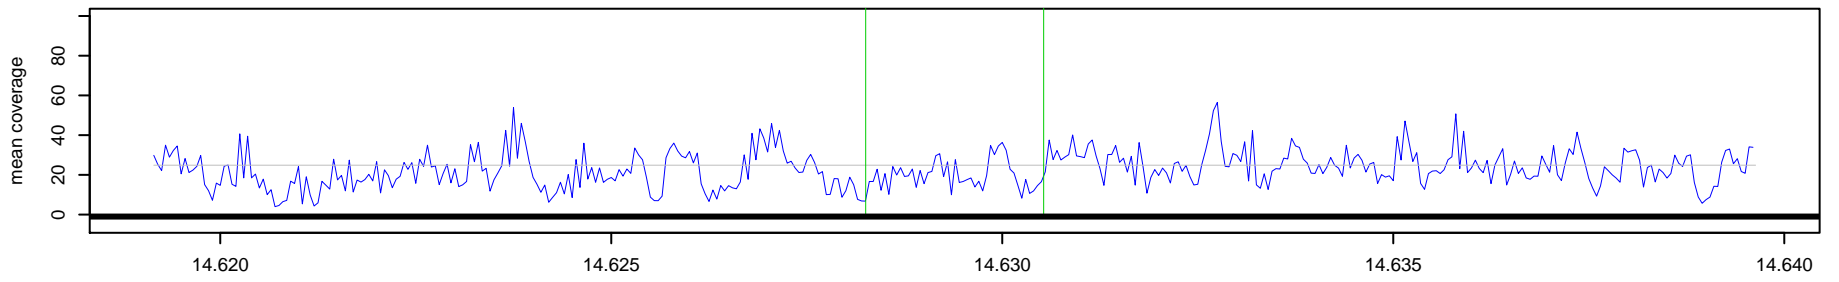

351 \_ NA10851 Chr 8 : 14628254 – 14630529 , 2276 bp (aCGH relative log2ratio= 0.53 )

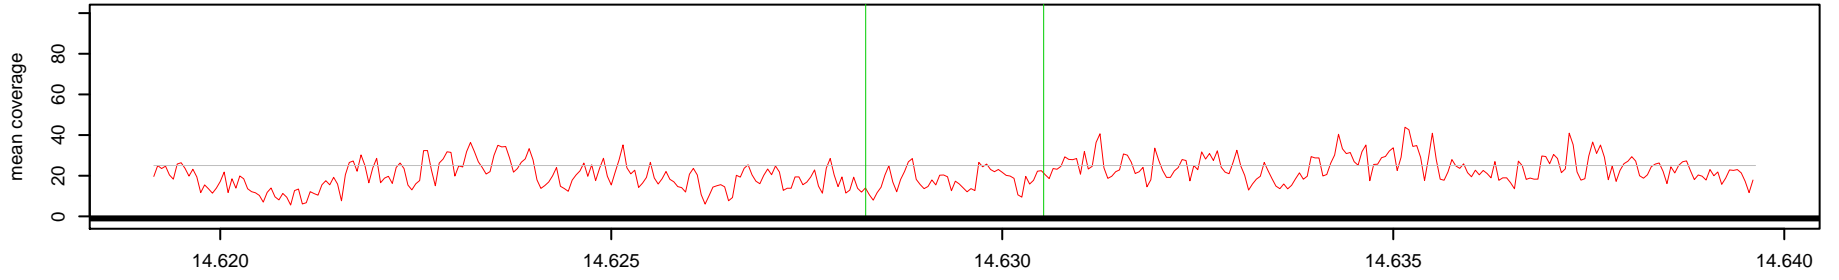

Log2( AK1 read depth / NA10851 read depth)

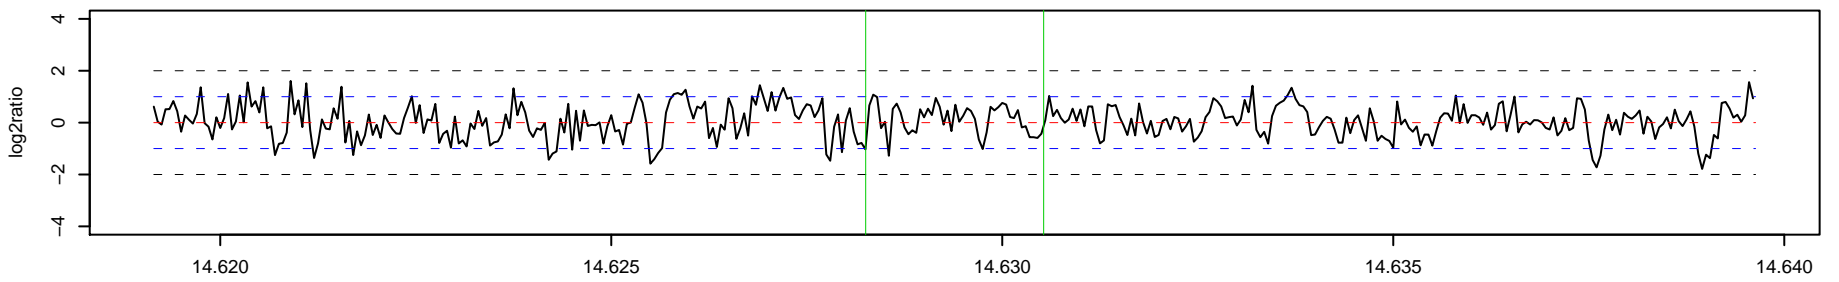

o

o

352 \_ AK1 Chr 8 : 16245568 – 16251365 , 5798 bp (aCGH relative log2ratio= -0.87 )

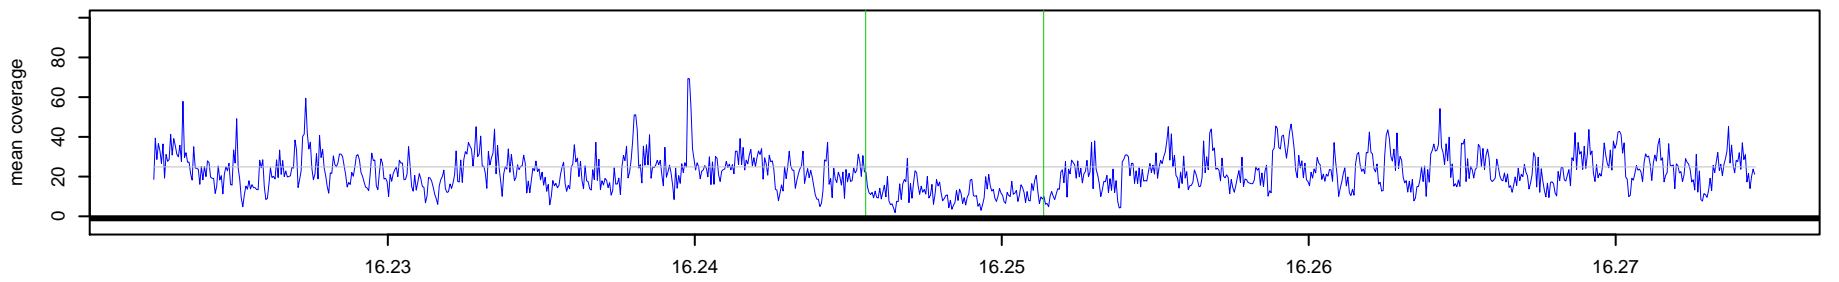

352 \_ NA10851 Chr 8 : 16245568 – 16251365 , 5798 bp (aCGH relative log2ratio= -0.87 )

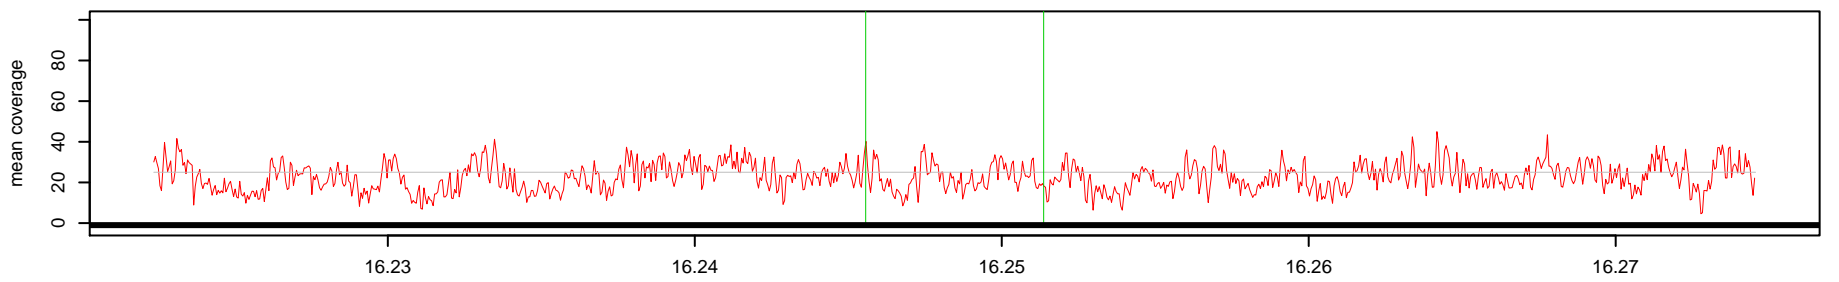

Log2( AK1 read depth / NA10851 read depth)

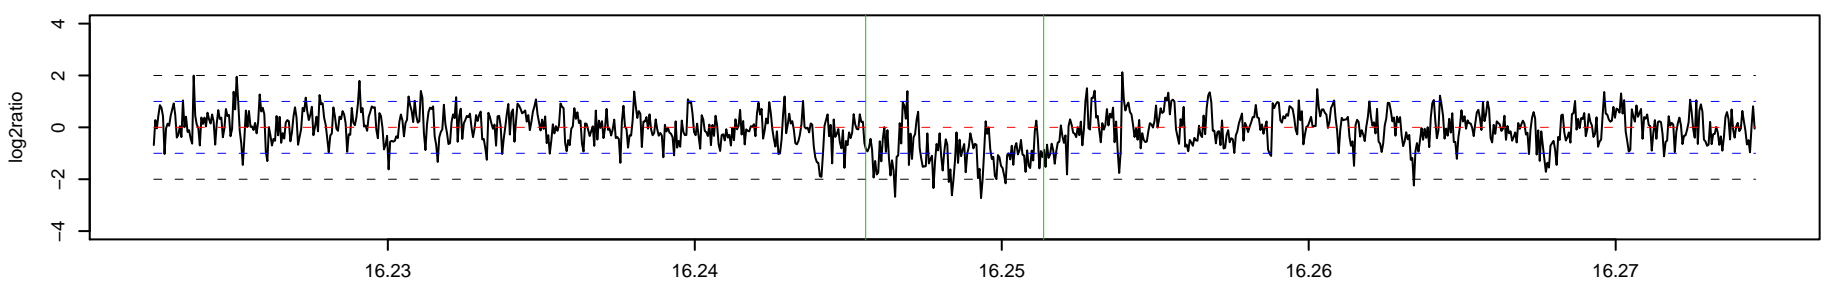

353\_AK1 Chr 8 : 17624947 – 17626193 , 1247 bp (aCGH relative log2ratio= 0.76 )

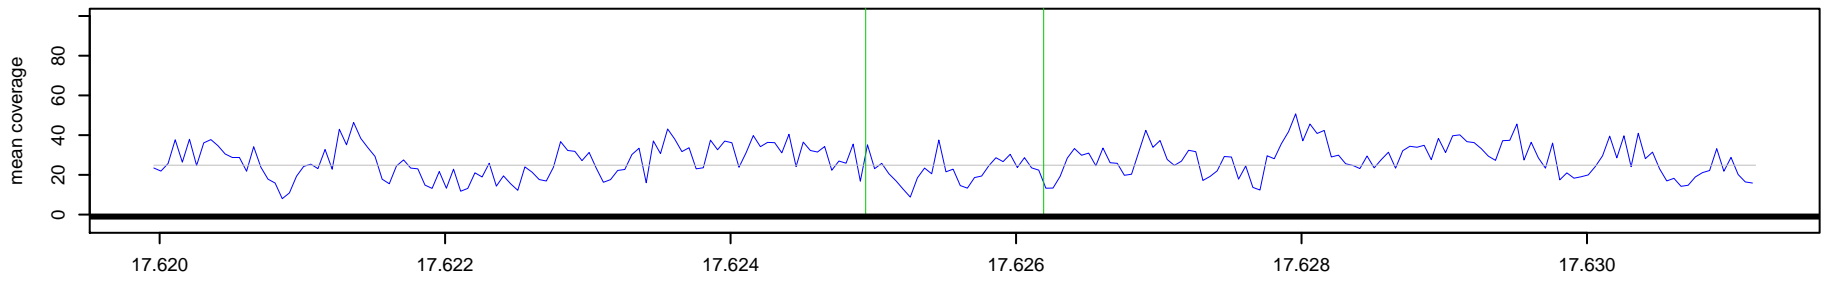

353\_NA10851 Chr 8 : 17624947 – 17626193 , 1247 bp (aCGH relative log2ratio= 0.76 )

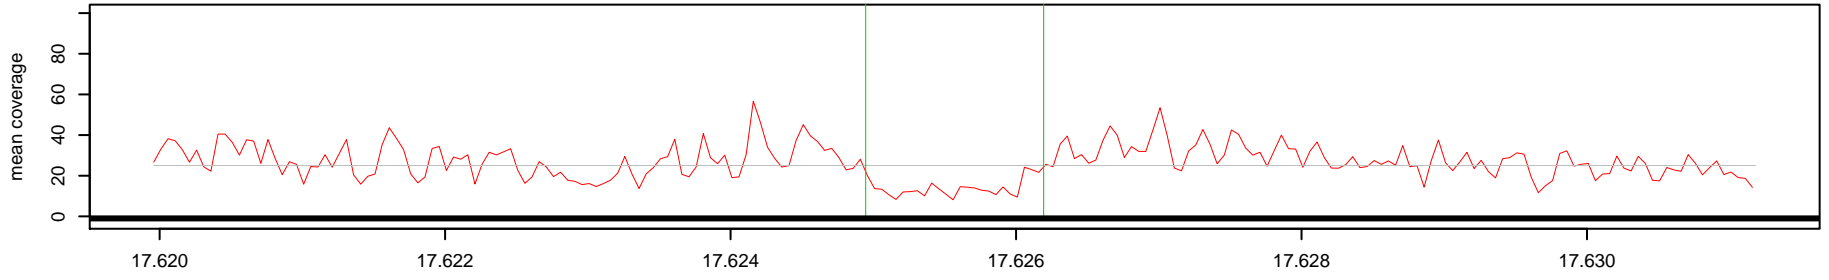

Log2( AK1 read depth / NA10851 read depth)

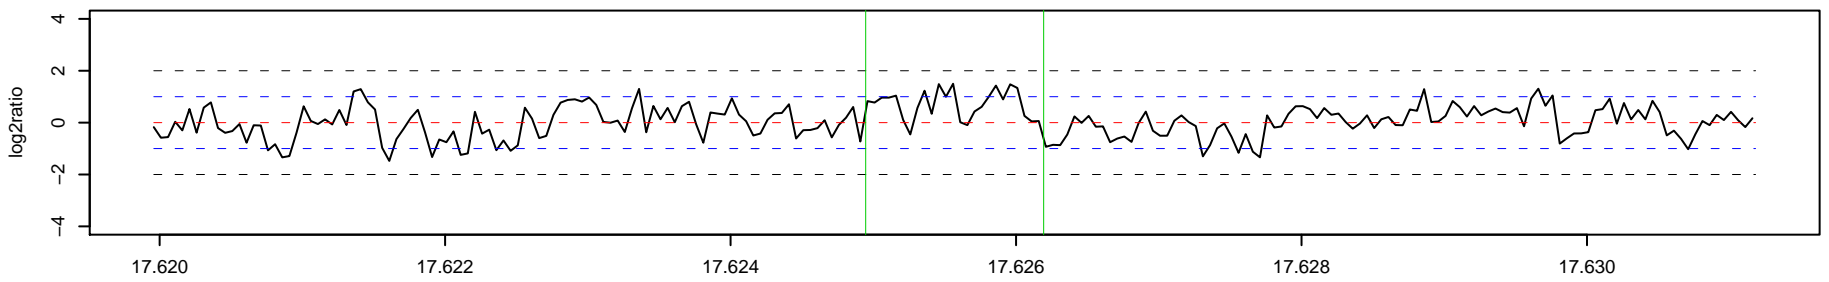

354\_AK1 Chr 8 : 25122894 – 25126139 , 3246 bp (aCGH relative log2ratio= 1.62 )

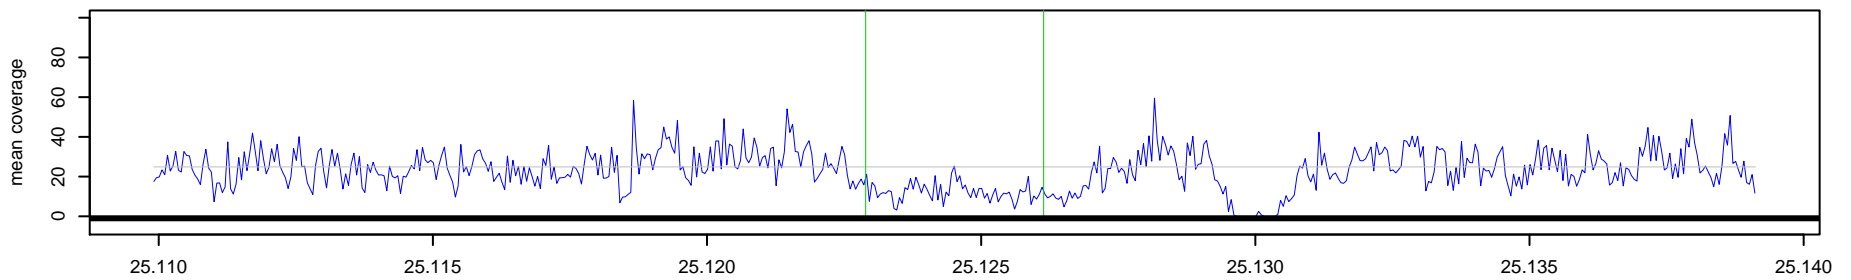

354\_NA10851 Chr 8 : 25122894 – 25126139 , 3246 bp (aCGH relative log2ratio= 1.62 )

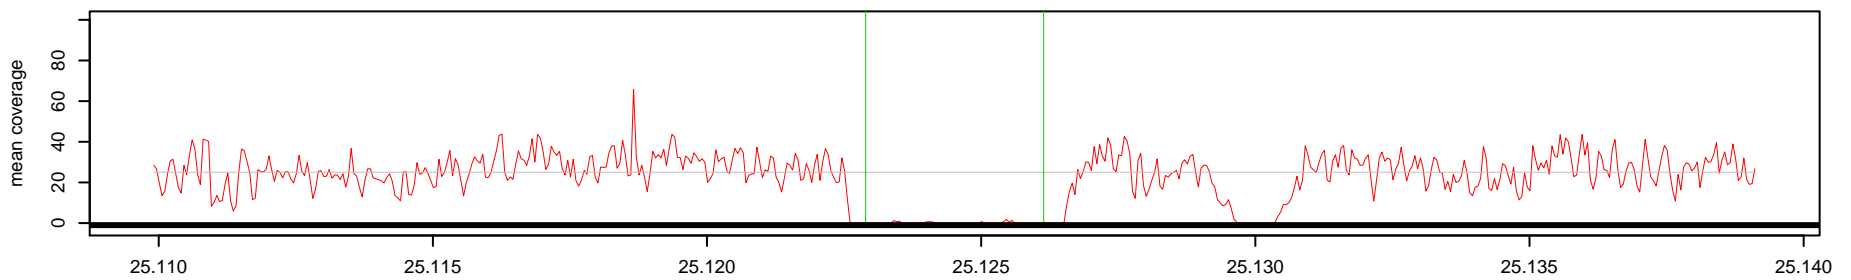

Log2( AK1 read depth / NA10851 read depth)

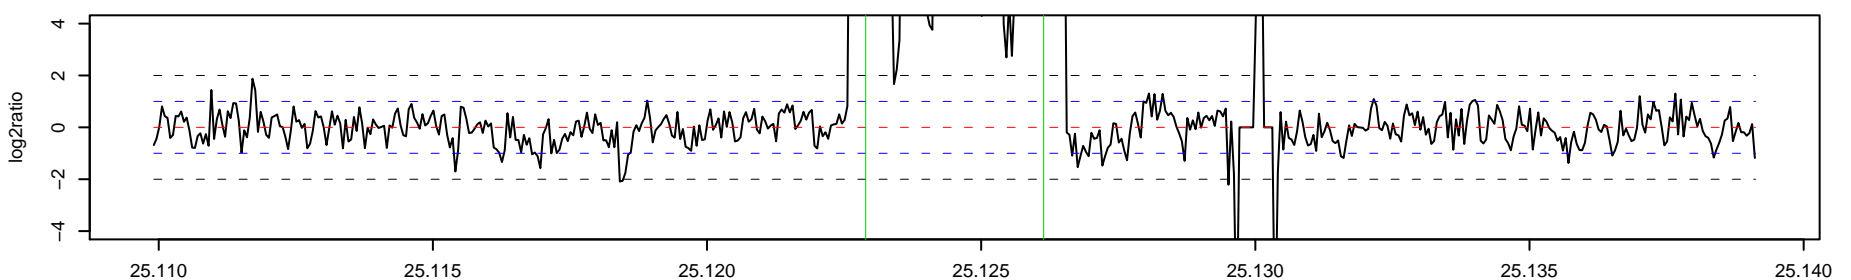

355\_AK1 Chr 8 : 30724050 – 30725011 , 962 bp (aCGH relative log2ratio= -1.00 )

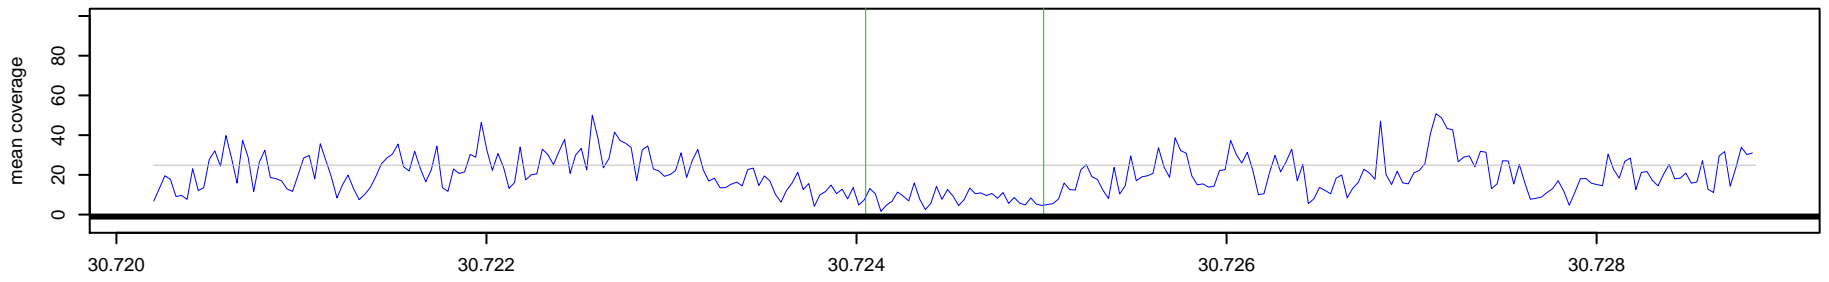

355\_NA10851 Chr 8 : 30724050 – 30725011 , 962 bp (aCGH relative log2ratio= -1.00 )

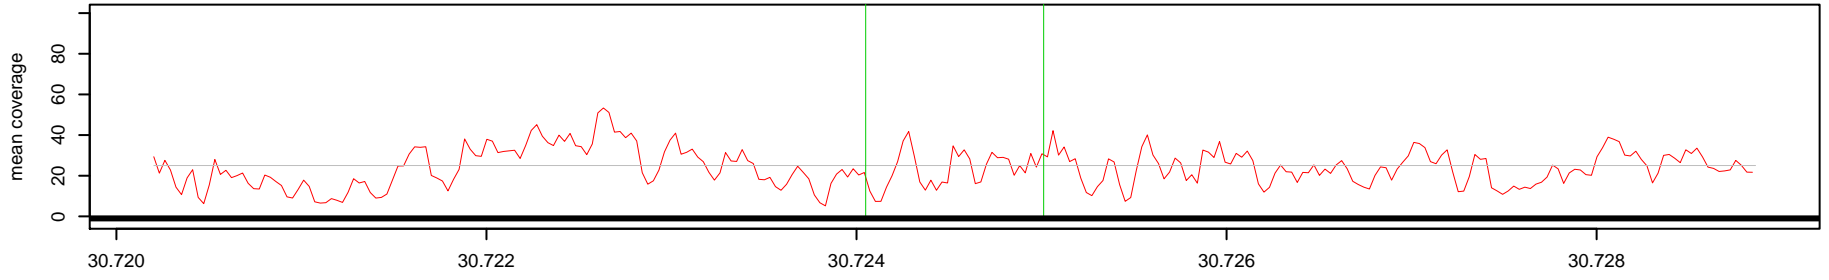

Log2( AK1 read depth / NA10851 read depth)

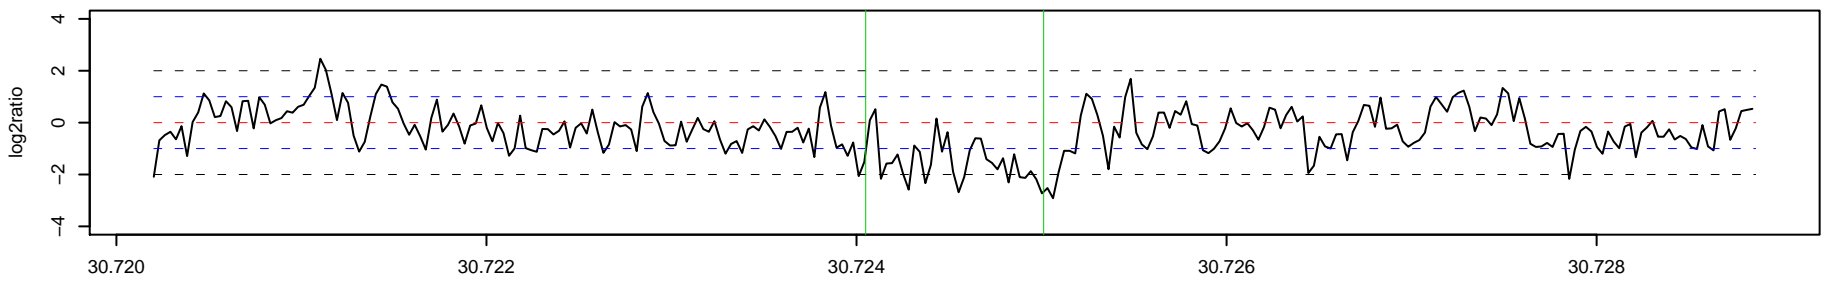

356\_AK1 Chr 8 : 36195020 – 36199539 , 4520 bp (aCGH relative log2ratio= -0.88 )

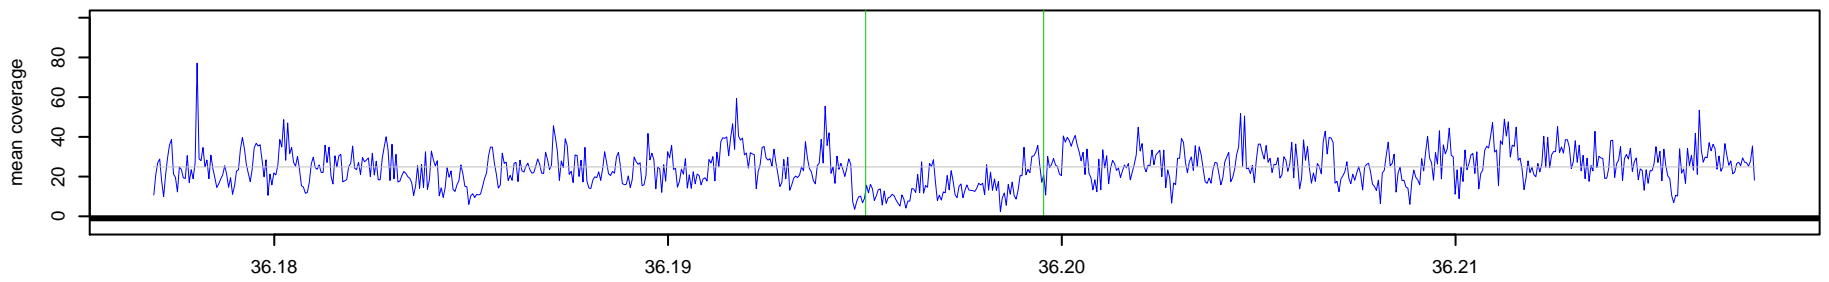

356\_NA10851 Chr 8 : 36195020 – 36199539 , 4520 bp (aCGH relative log2ratio= -0.88 )

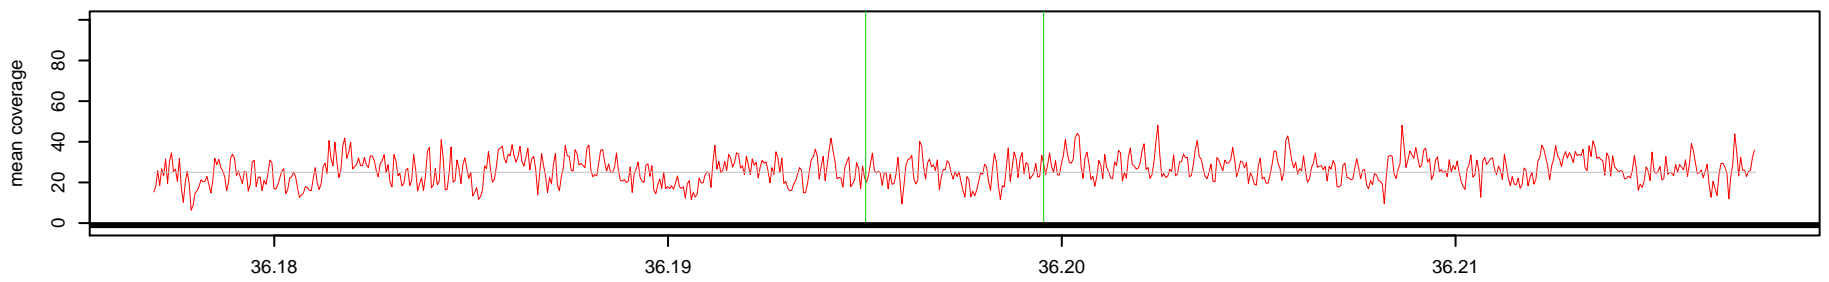

Log2( AK1 read depth / NA10851 read depth)

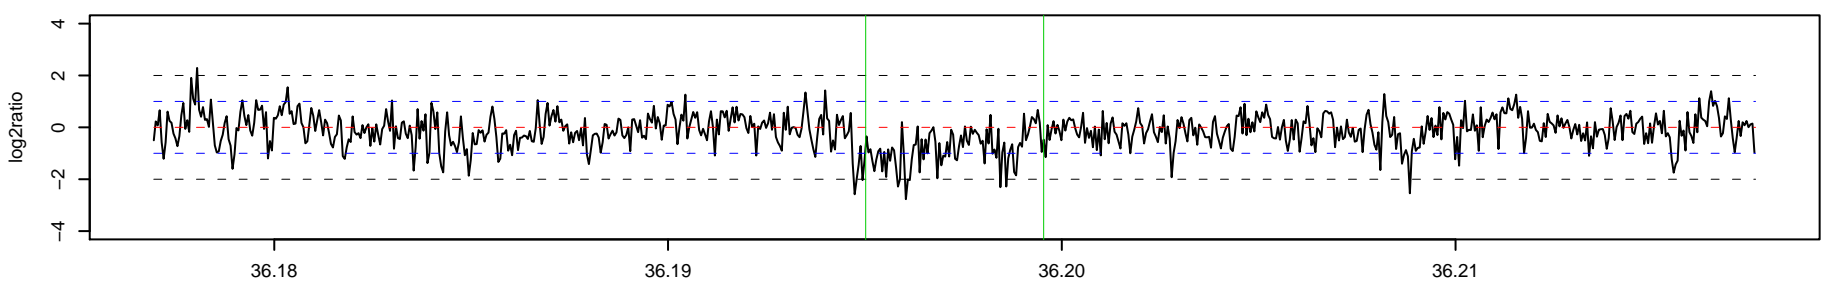

357 \_ AK1 Chr 8 : 39351157 – 39505456 , 154300 bp (aCGH relative log2ratio= 0.85 )

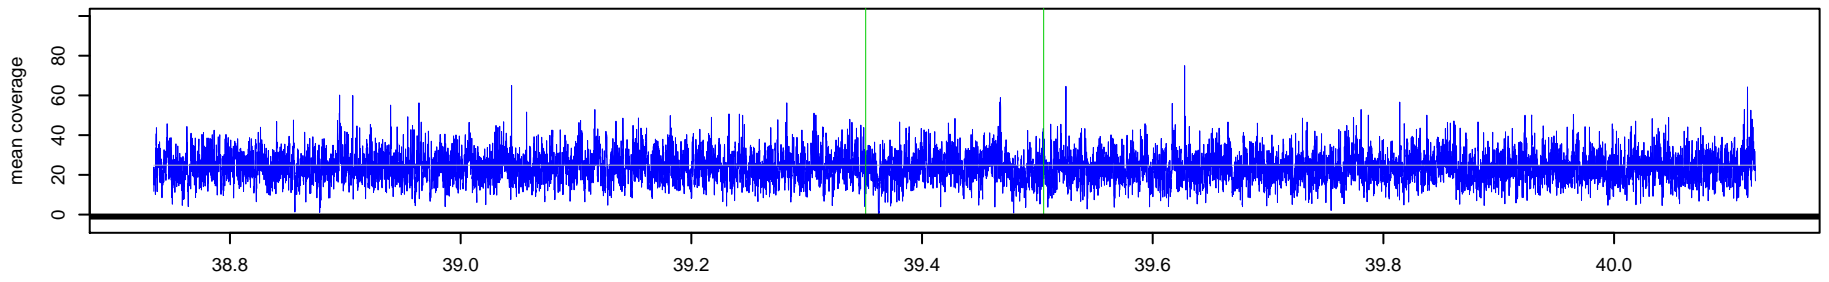

357 \_ NA10851 Chr 8 : 39351157 – 39505456 , 154300 bp (aCGH relative log2ratio= 0.85 )

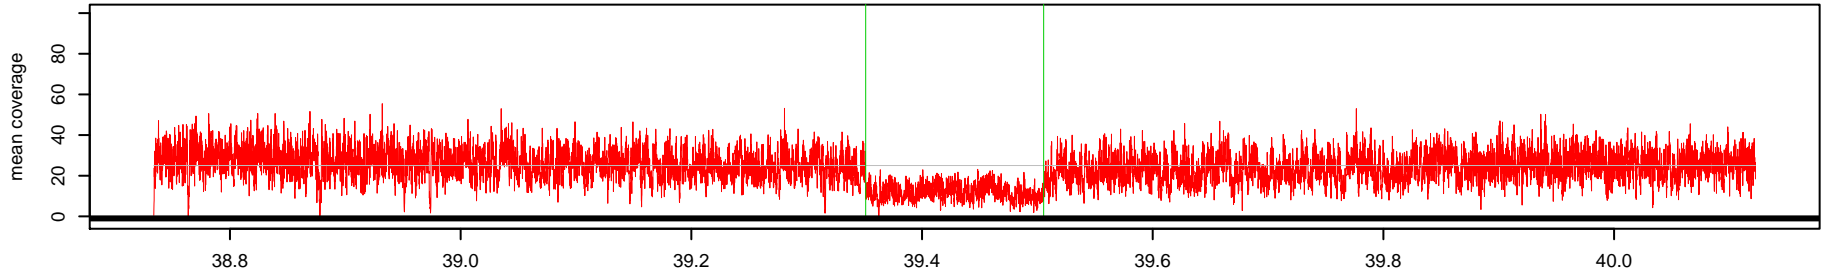

Log2( AK1 read depth / NA10851 read depth)

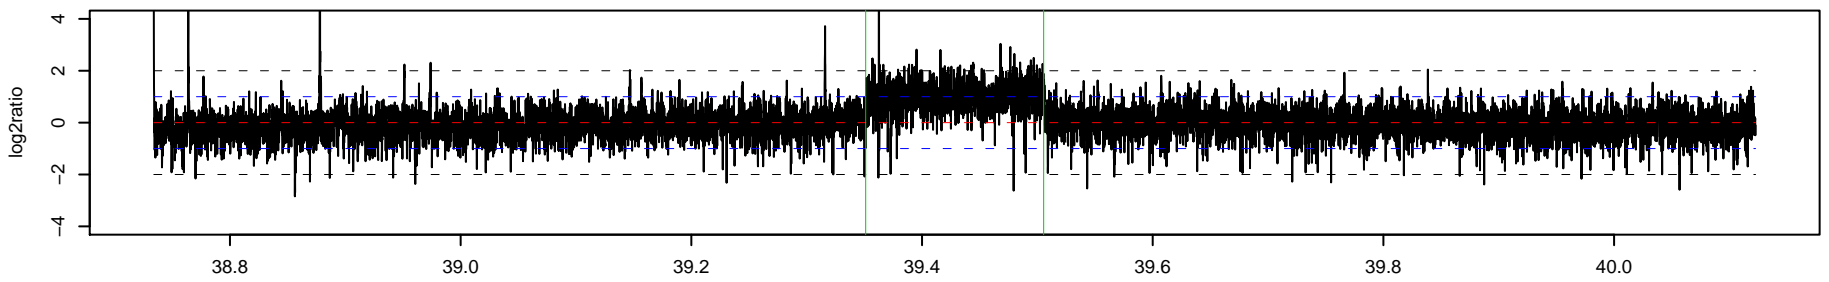

358 \_ AK1 Chr 8 : 40893665 – 40898766 , 5102 bp (aCGH relative log2ratio= -1.38 )

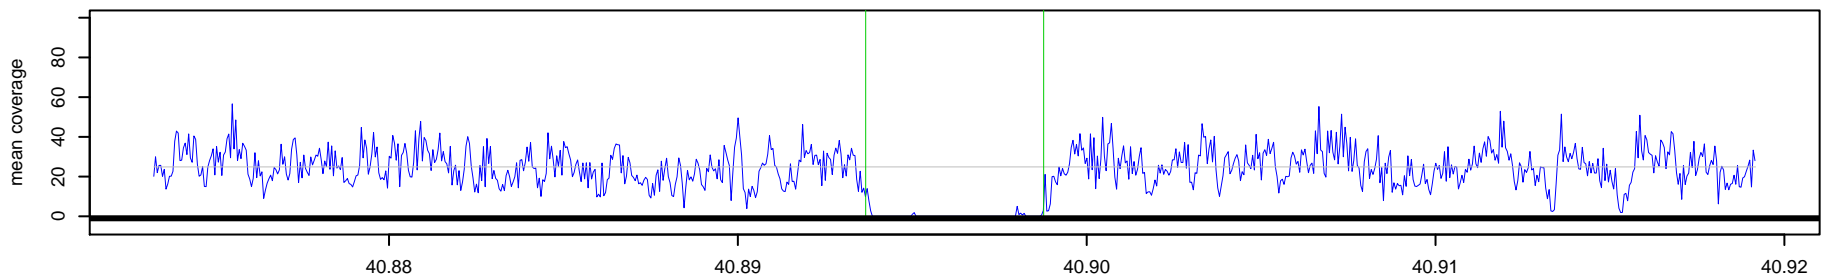

358 \_ NA10851 Chr 8 : 40893665 – 40898766 , 5102 bp (aCGH relative log2ratio= -1.38 )

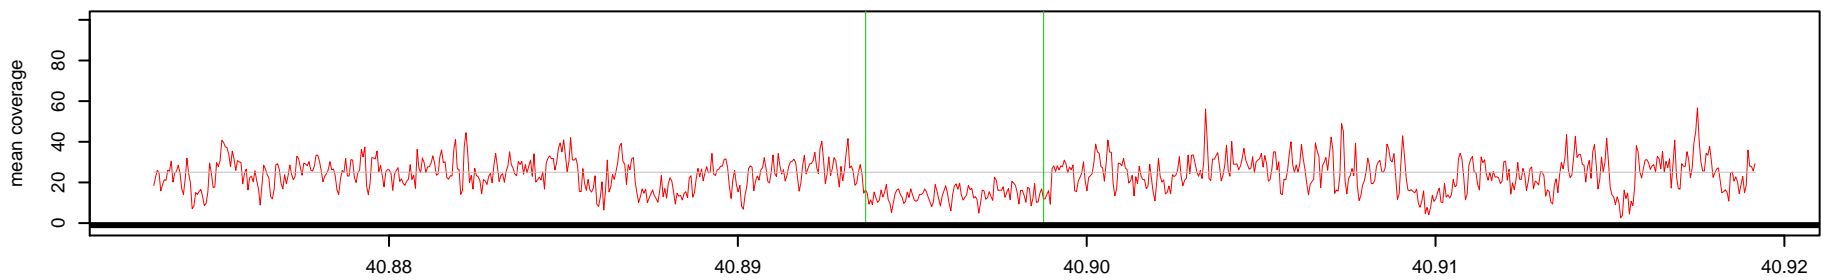

Log2( AK1 read depth / NA10851 read depth)

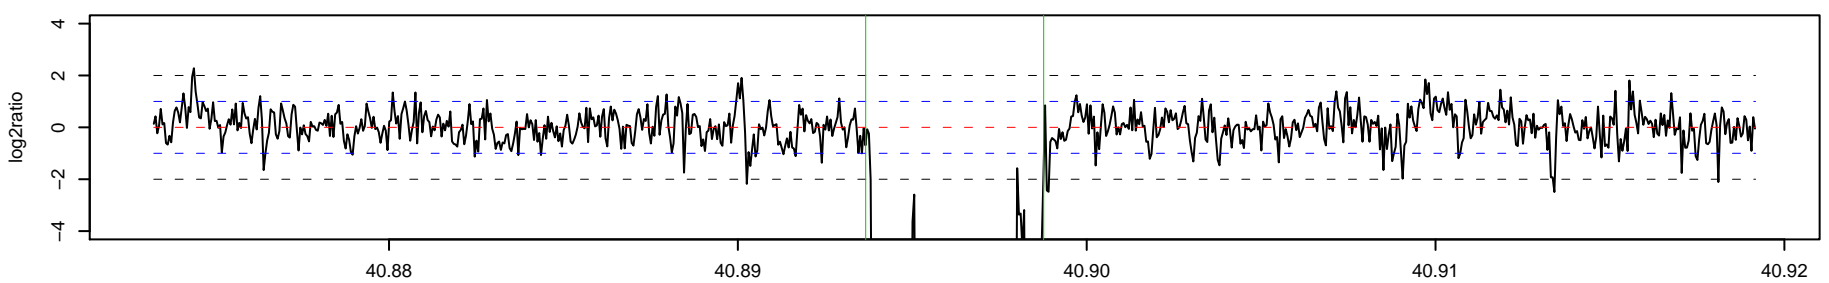

359\_AK1 Chr 8 : 49255282 – 49256402 , 1121 bp (aCGH relative log2ratio= 0.84 )

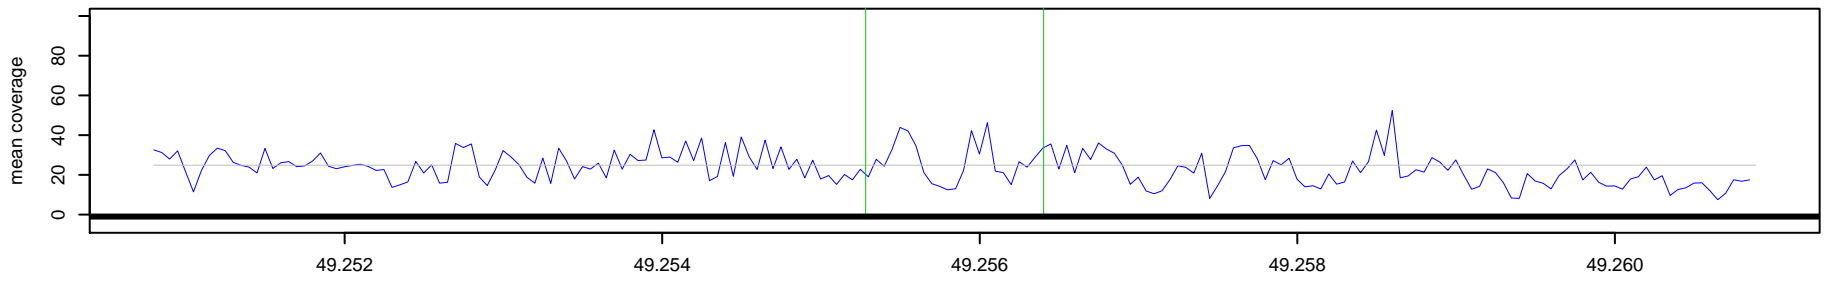

359\_NA10851 Chr 8 : 49255282 – 49256402 , 1121 bp (aCGH relative log2ratio= 0.84 )

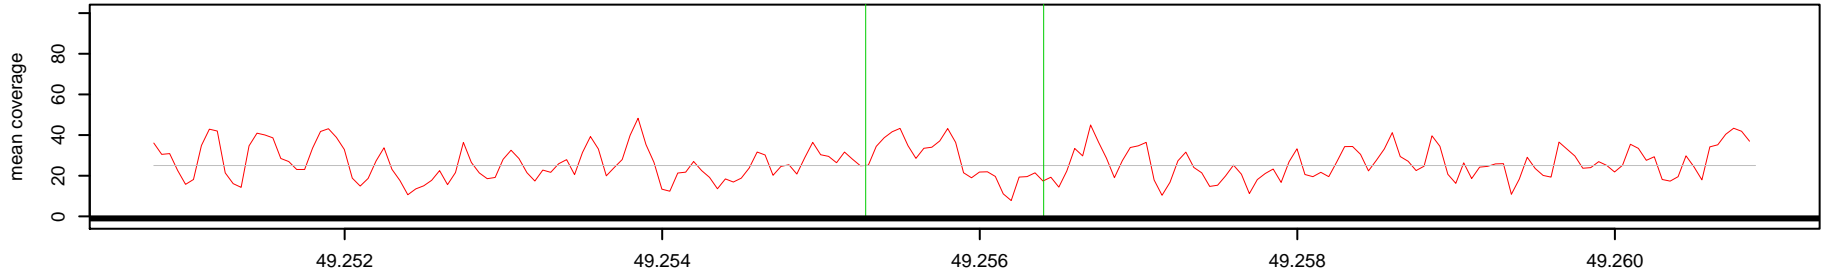

Log2( AK1 read depth / NA10851 read depth)

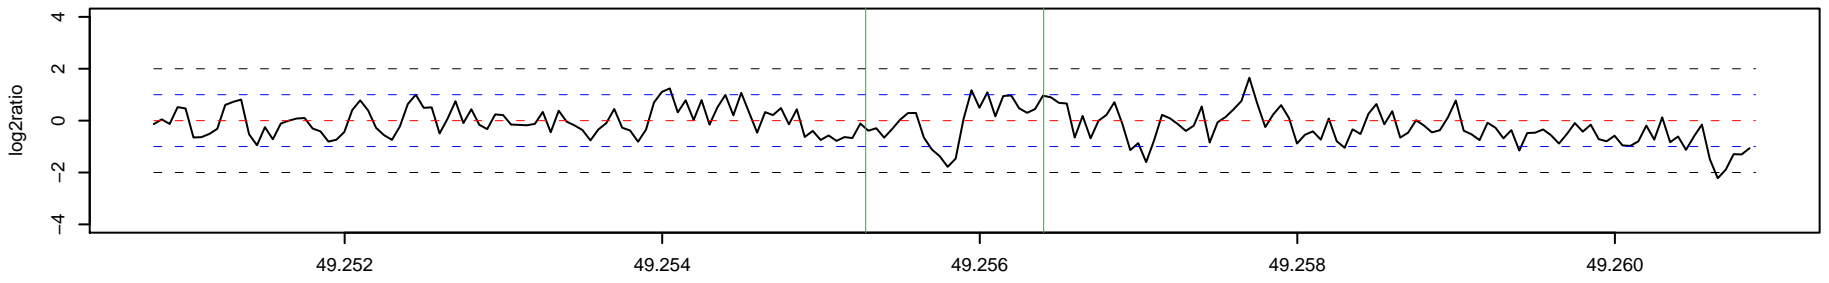

360\_AK1 Chr 8 : 58277312 – 58291806 , 14495 bp (aCGH relative log2ratio= 0.91 )

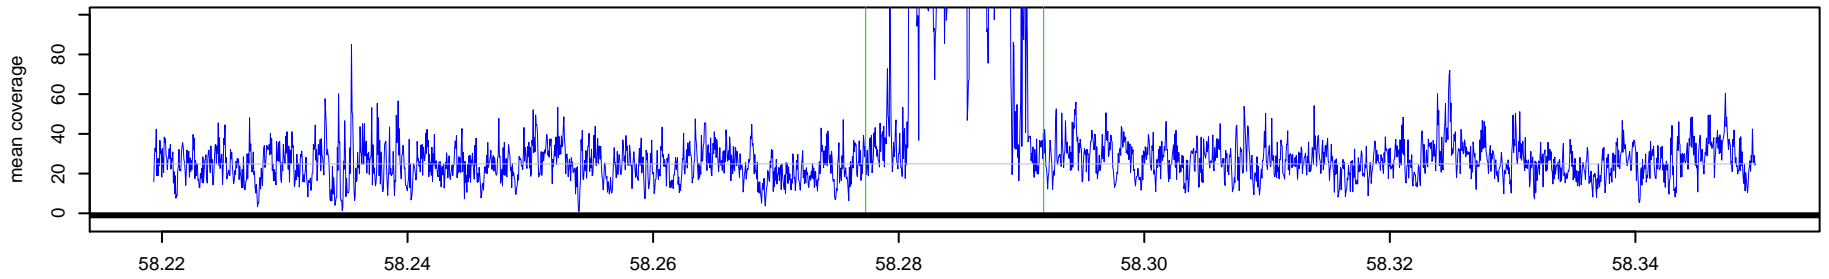

360\_NA10851 Chr 8 : 58277312 – 58291806 , 14495 bp (aCGH relative log2ratio= 0.91 )

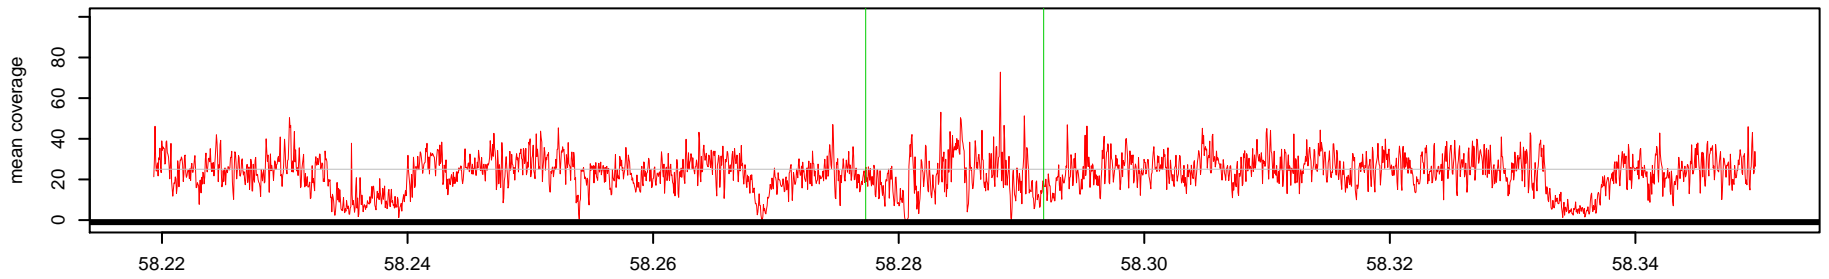

Log2( AK1 read depth / NA10851 read depth)

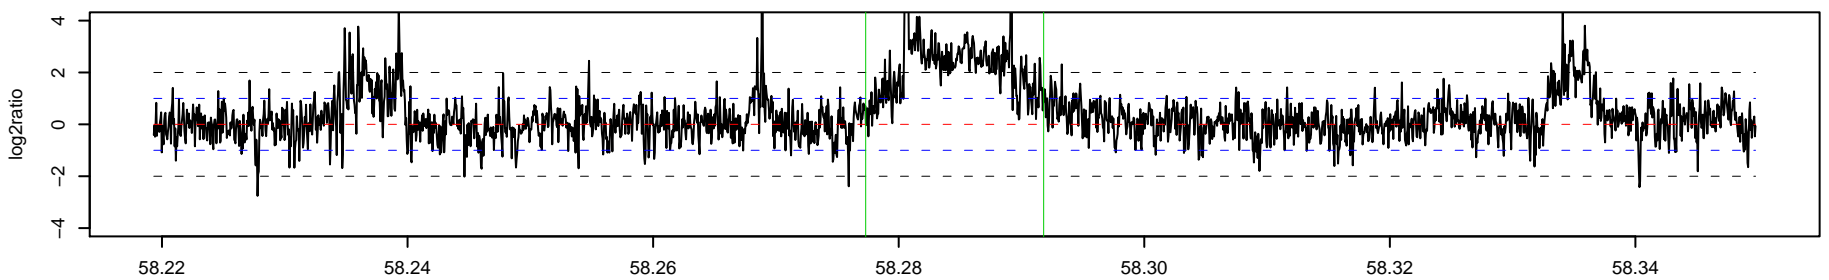



361 \_ AK1 Chr 8 : 58280550 – 58290256 , 9707 bp (aCGH relative log2ratio= 1.50 )

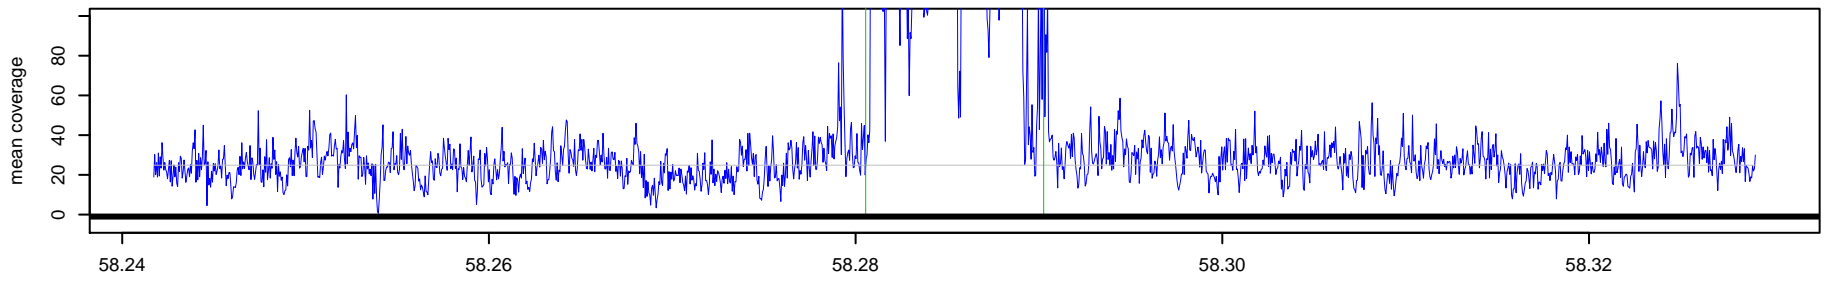

361 \_ NA10851 Chr 8 : 58280550 – 58290256 , 9707 bp (aCGH relative log2ratio= 1.50 )

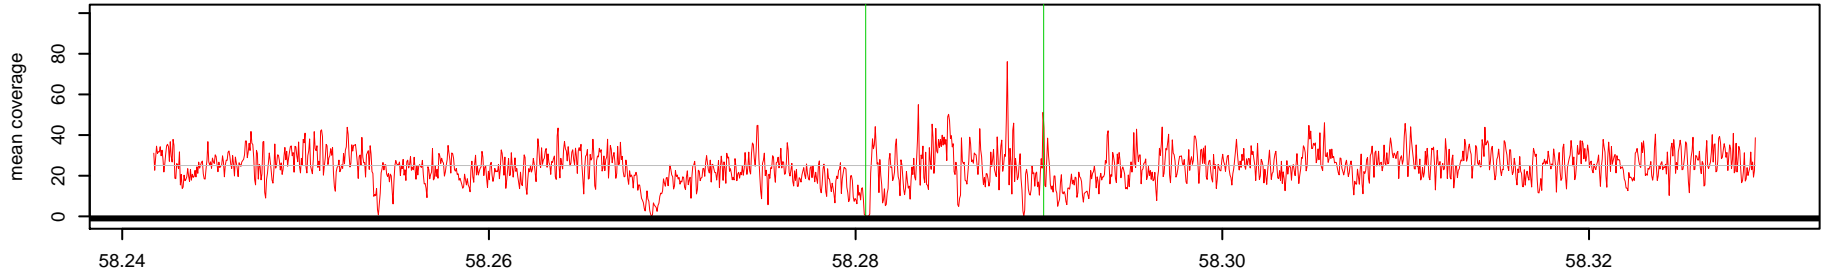

Log2( AK1 read depth / NA10851 read depth)

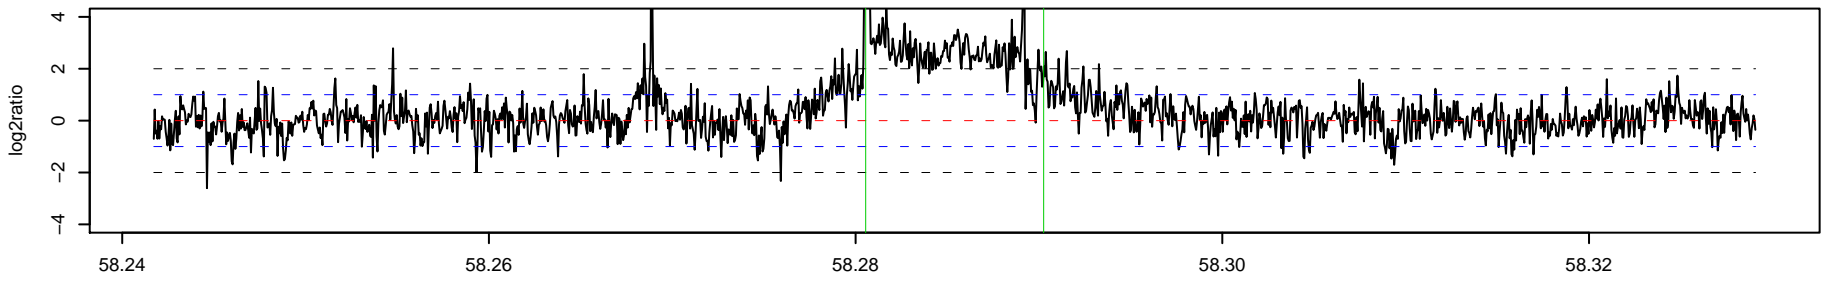

362 \_ AK1 Chr 8 : 59881849 – 59882438 , 590 bp (aCGH relative log2ratio= 0.27 )

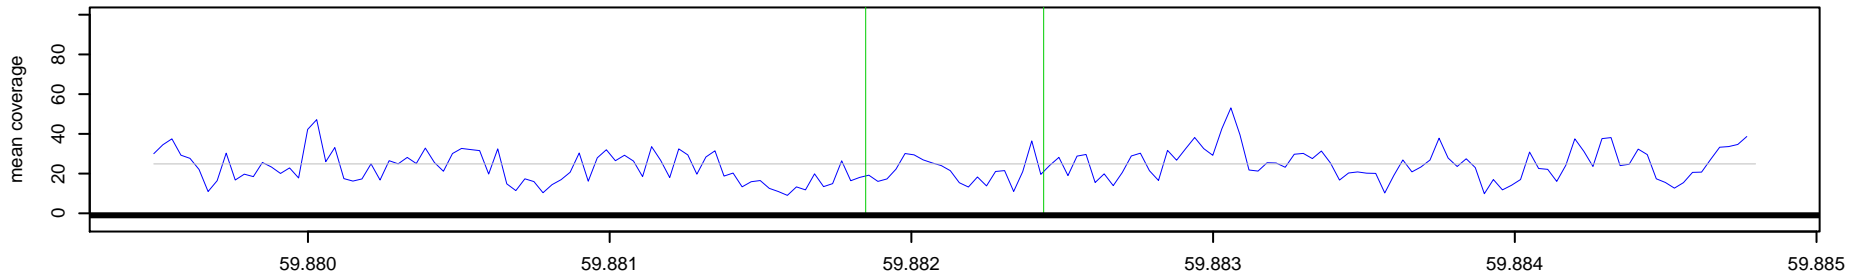

362 \_ NA10851 Chr 8 : 59881849 – 59882438 , 590 bp (aCGH relative log2ratio= 0.27 )

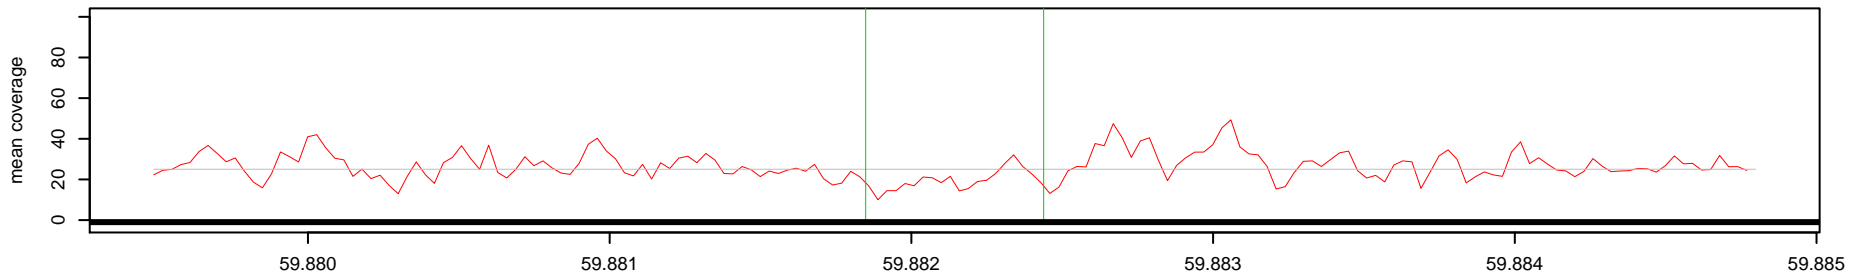

Log2( AK1 read depth / NA10851 read depth)

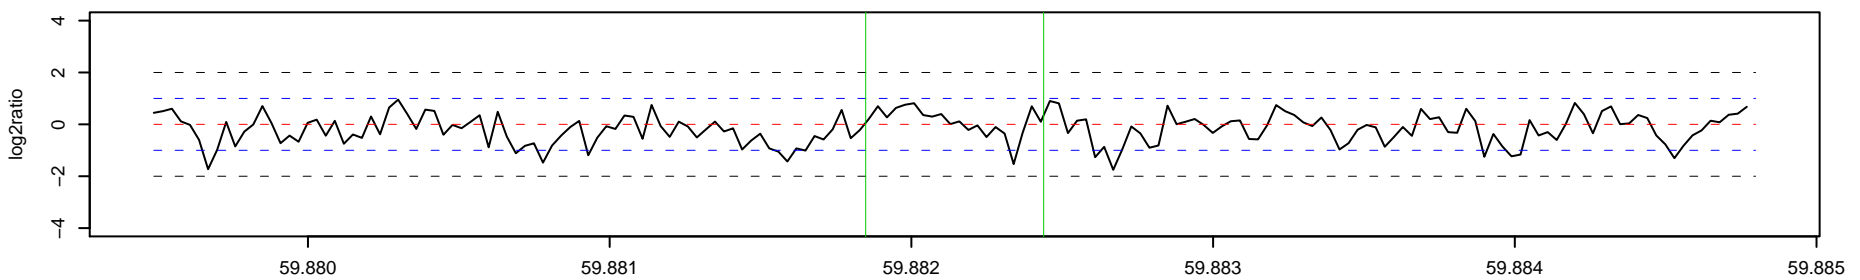

363\_AK1 Chr 8 : 59964896 – 59965384 , 489 bp (aCGH relative log2ratio= 0.56 )

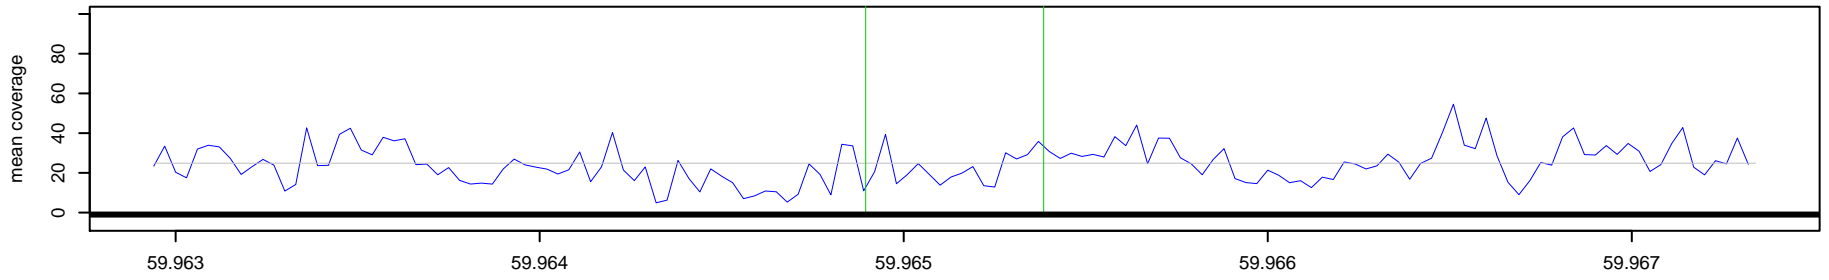

363\_NA10851 Chr 8 : 59964896 – 59965384 , 489 bp (aCGH relative log2ratio= 0.56 )

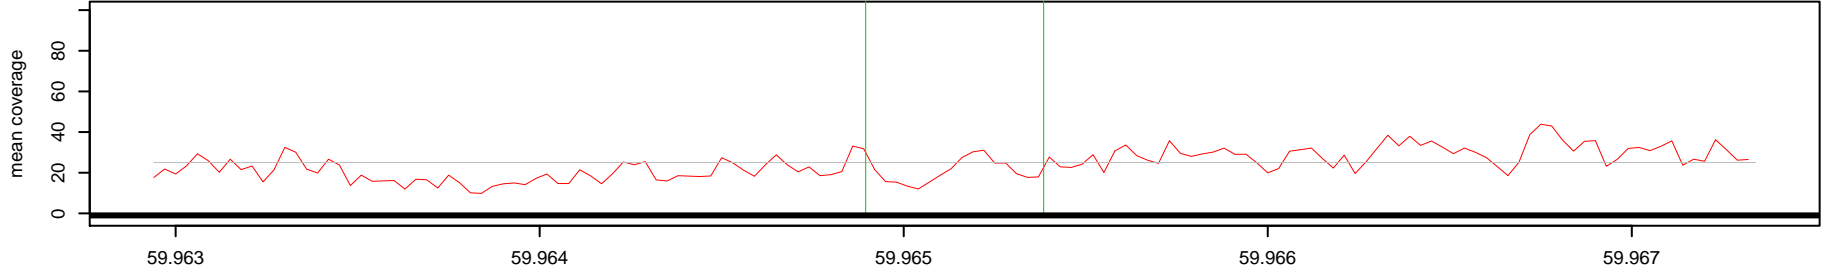

Log2( AK1 read depth / NA10851 read depth)

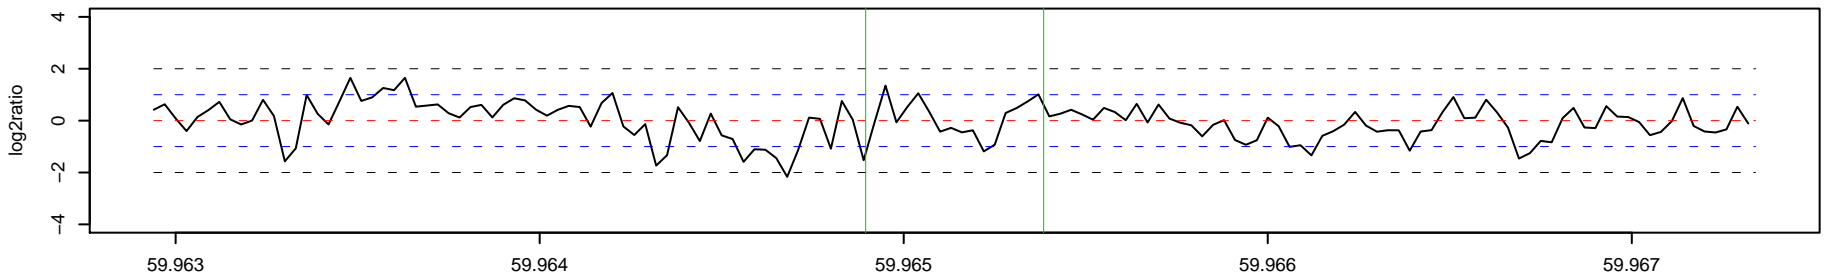

364\_AK1 Chr 8 : 72377326 – 72380317 , 2992 bp (aCGH relative log2ratio= -0.84 )

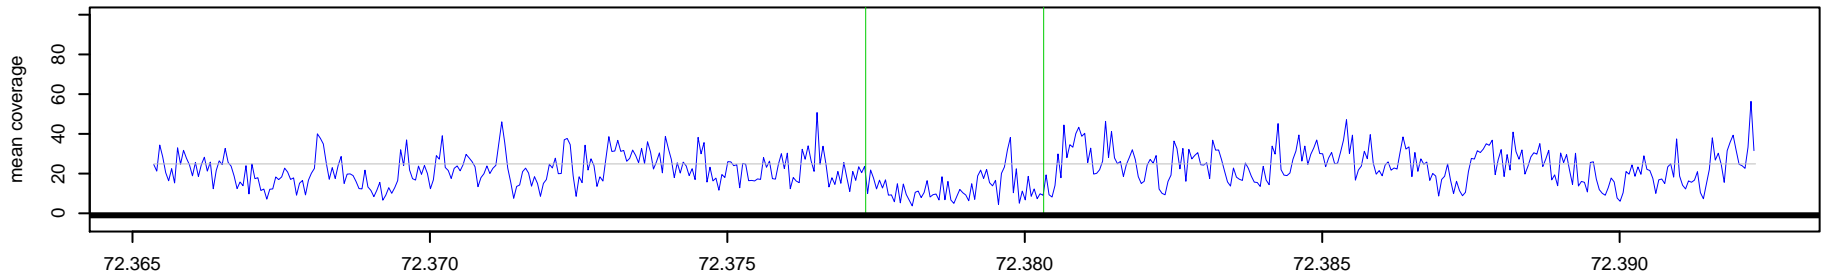

364\_NA10851 Chr 8 : 72377326 – 72380317 , 2992 bp (aCGH relative log2ratio= -0.84 )

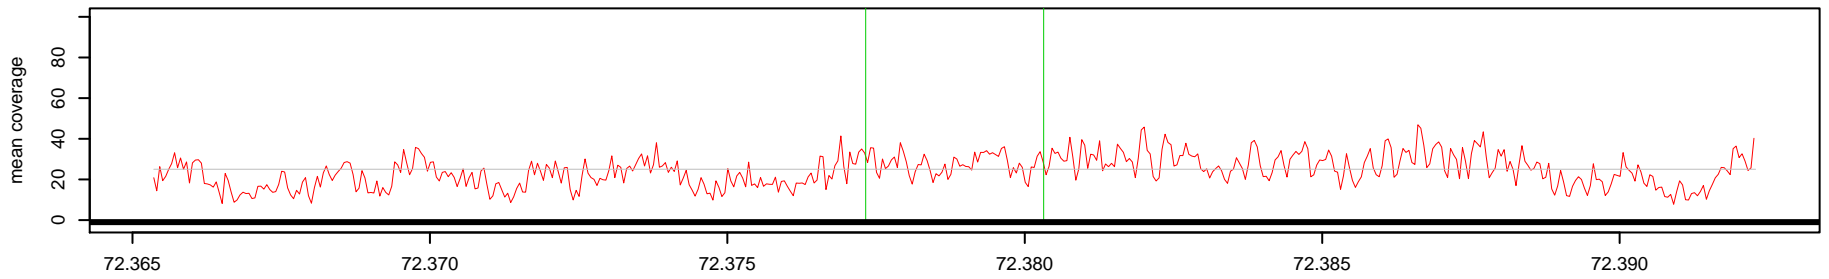

Log2( AK1 read depth / NA10851 read depth)

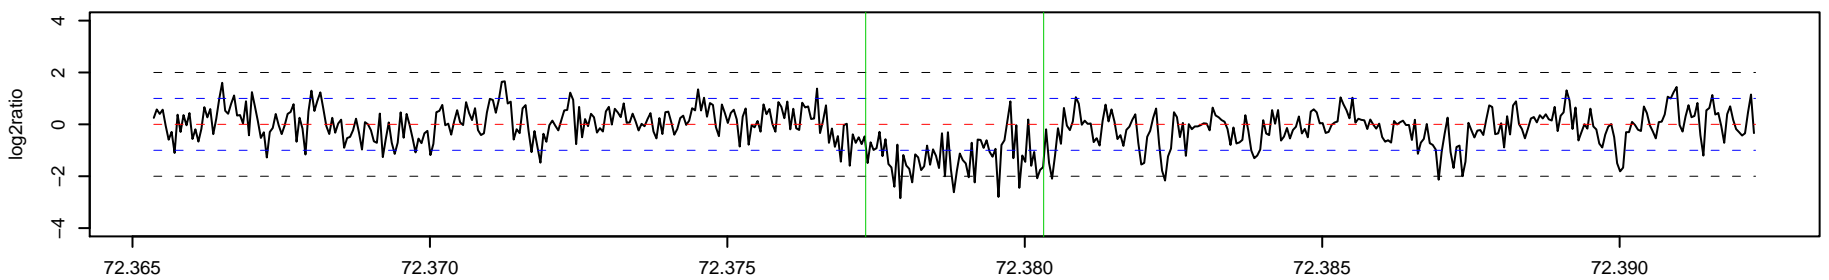

365\_AK1 Chr 8 : 75527618 – 75529516 , 1899 bp (aCGH relative log2ratio= 1.80 )

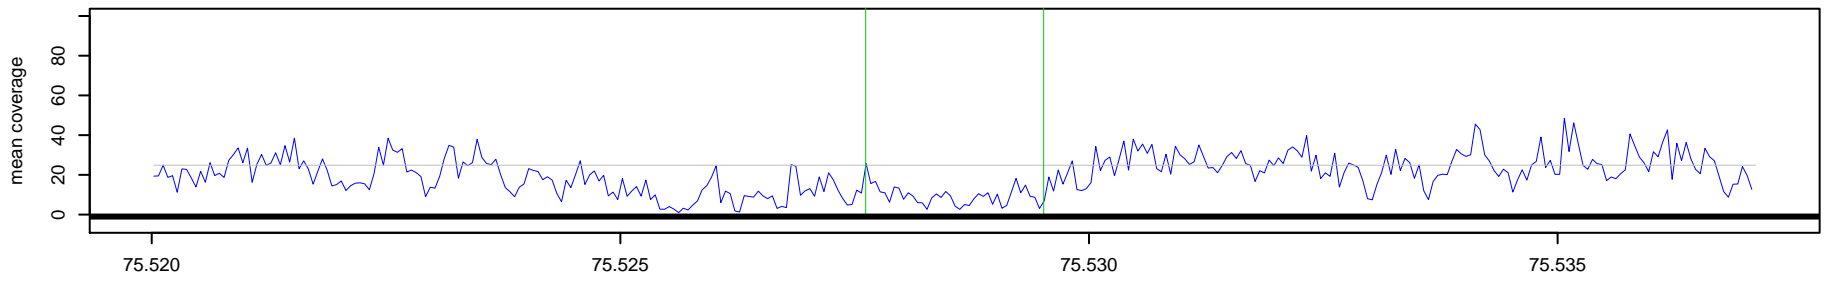

365\_NA10851 Chr 8 : 75527618 – 75529516 , 1899 bp (aCGH relative log2ratio= 1.80 )

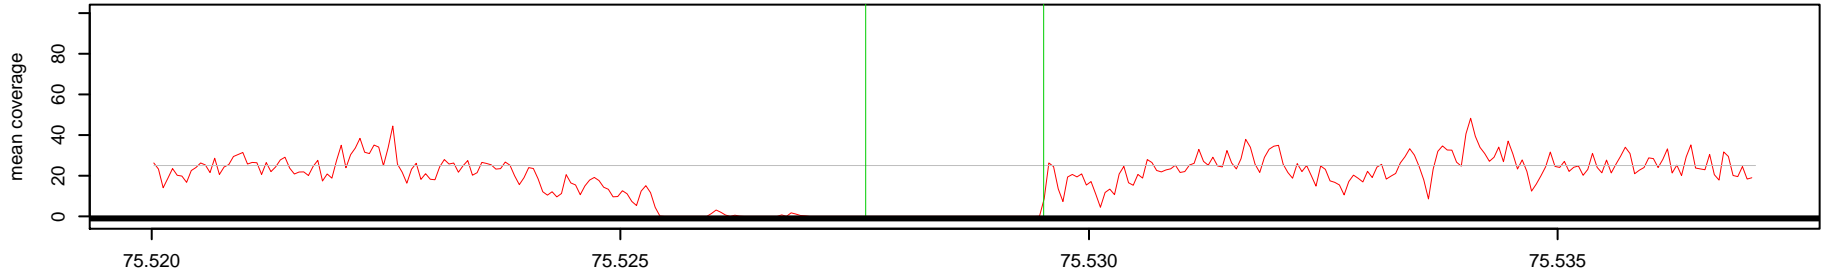

Log2( AK1 read depth / NA10851 read depth)

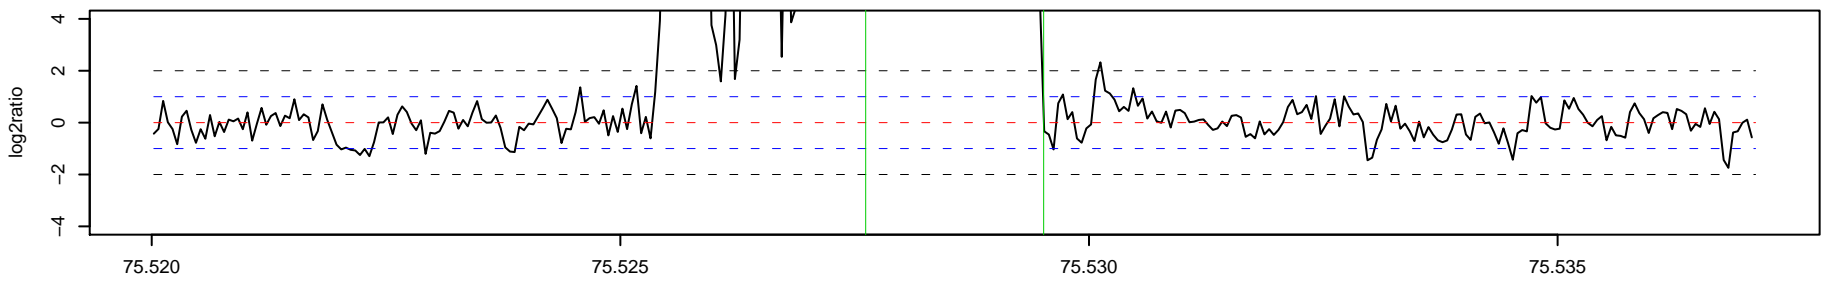

366\_AK1 Chr 8 : 82207850 – 82208795 , 946 bp (aCGH relative log2ratio= 0.59 )

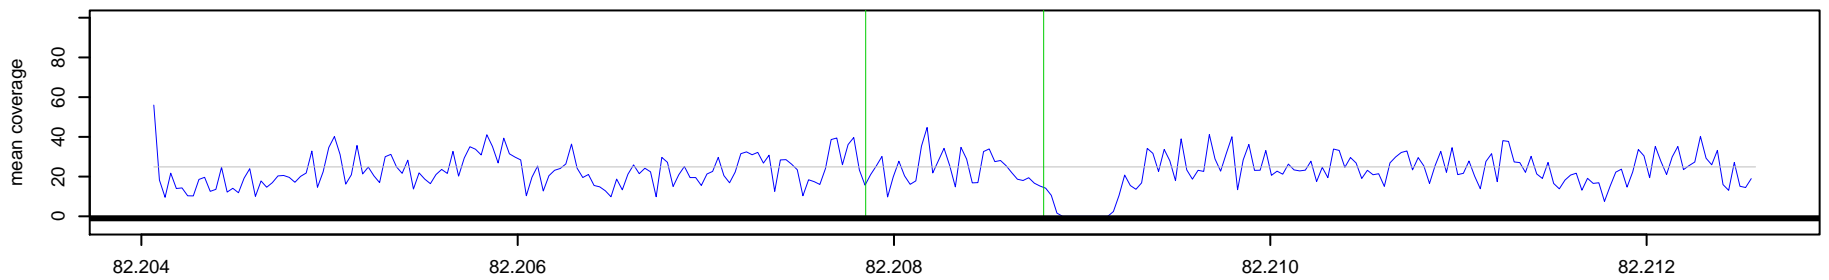

366\_NA10851 Chr 8 : 82207850 – 82208795 , 946 bp (aCGH relative log2ratio= 0.59 )

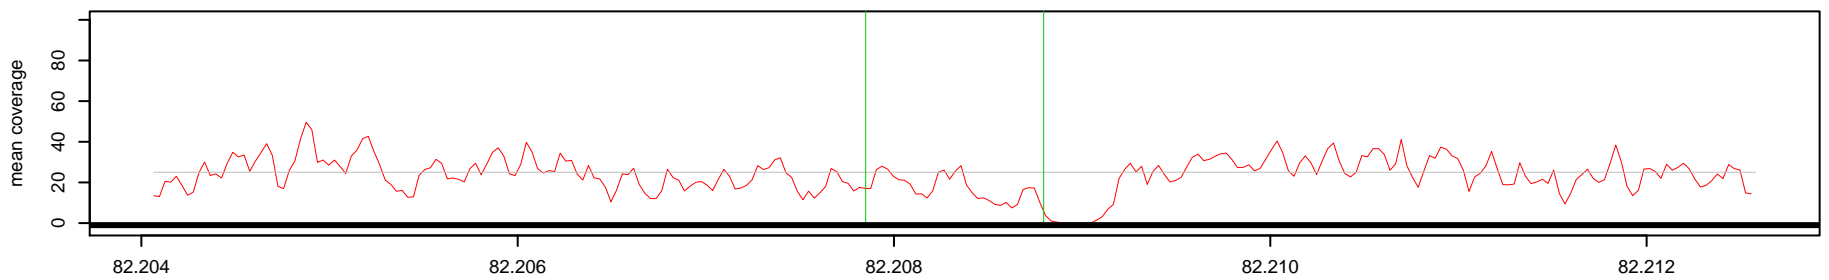

Log2( AK1 read depth / NA10851 read depth)

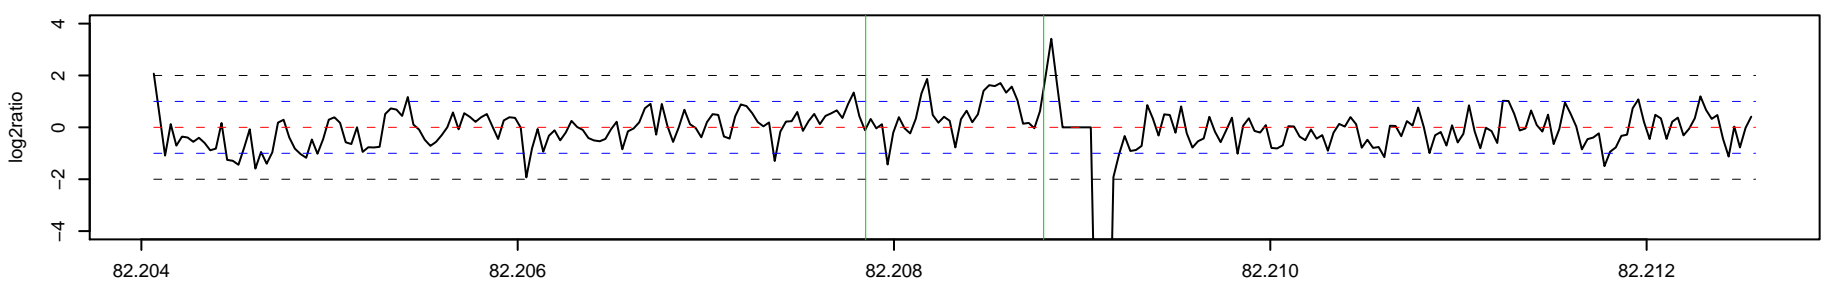

367 \_ AK1 Chr 8 : 85423515 – 85431549 , 8035 bp (aCGH relative log2ratio= 0.79 )

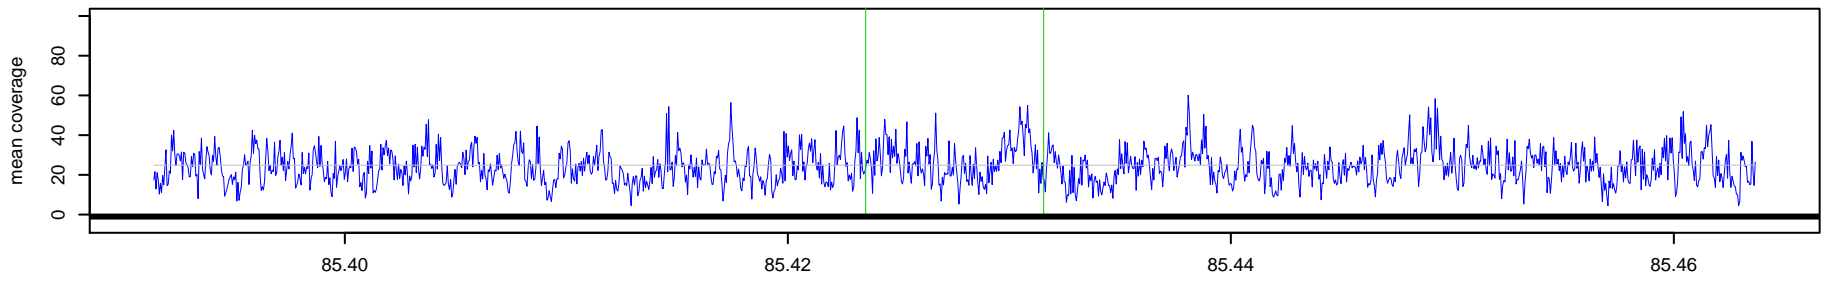

367 \_ NA10851 Chr 8 : 85423515 – 85431549 , 8035 bp (aCGH relative log2ratio= 0.79 )

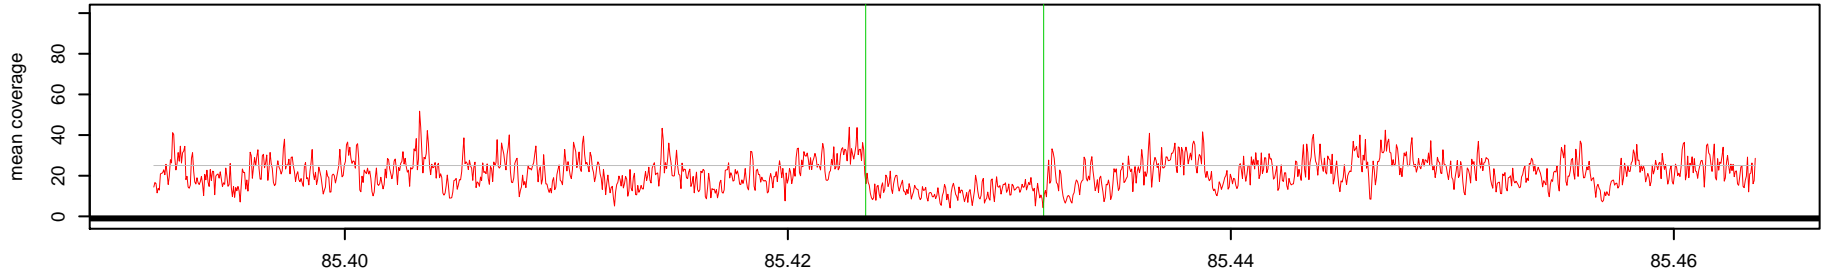

Log2( AK1 read depth / NA10851 read depth)

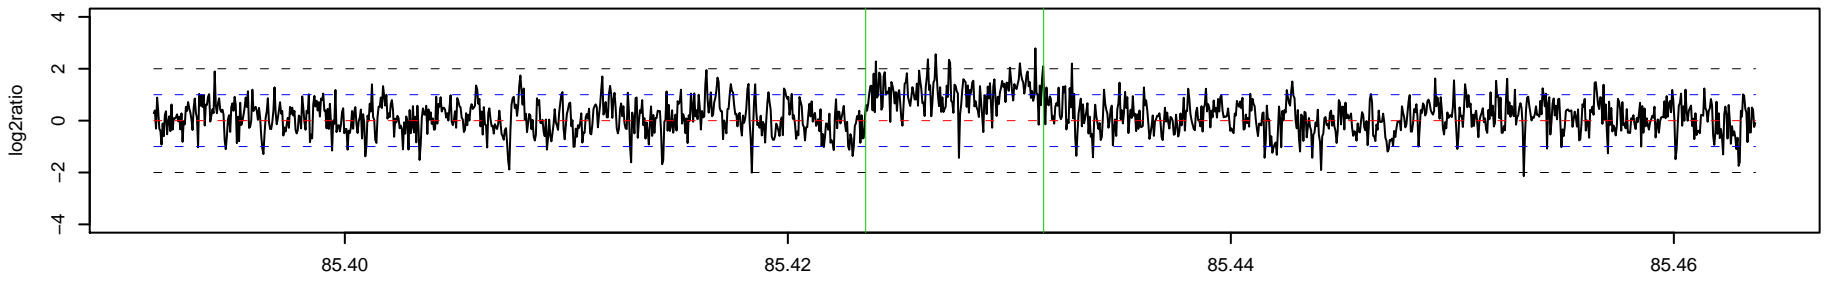

o

o

368 \_ AK1 Chr 8 : 97589769 – 97590998 , 1230 bp (aCGH relative log2ratio= 0.87 )

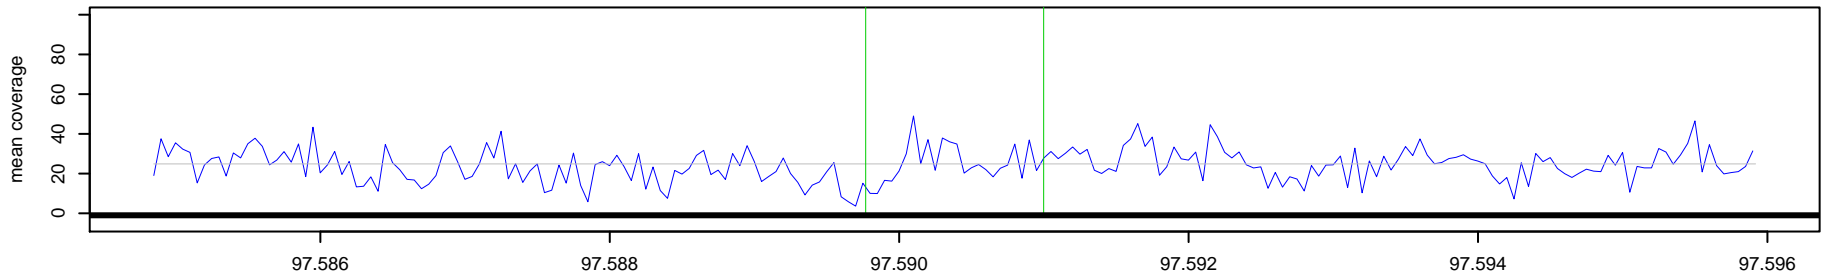

368 \_ NA10851 Chr 8 : 97589769 – 97590998 , 1230 bp (aCGH relative log2ratio= 0.87 )

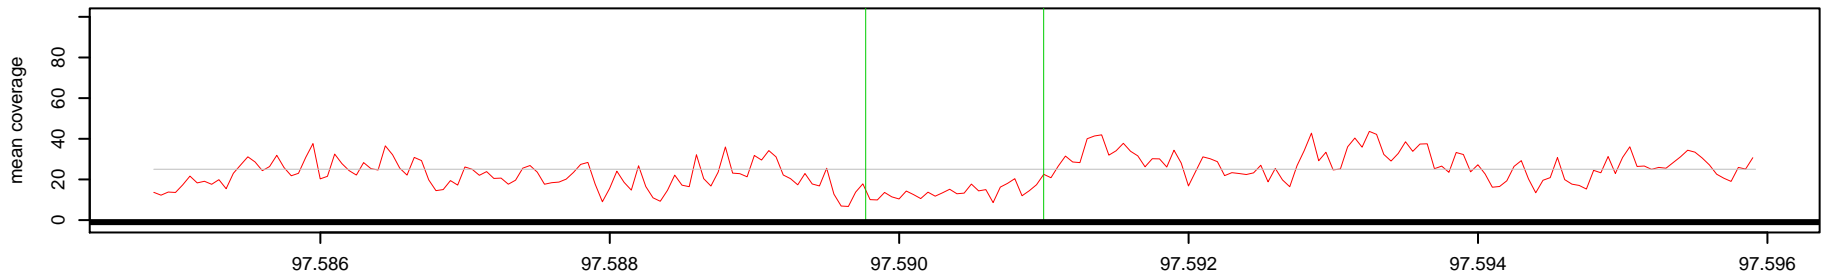

Log2( AK1 read depth / NA10851 read depth)

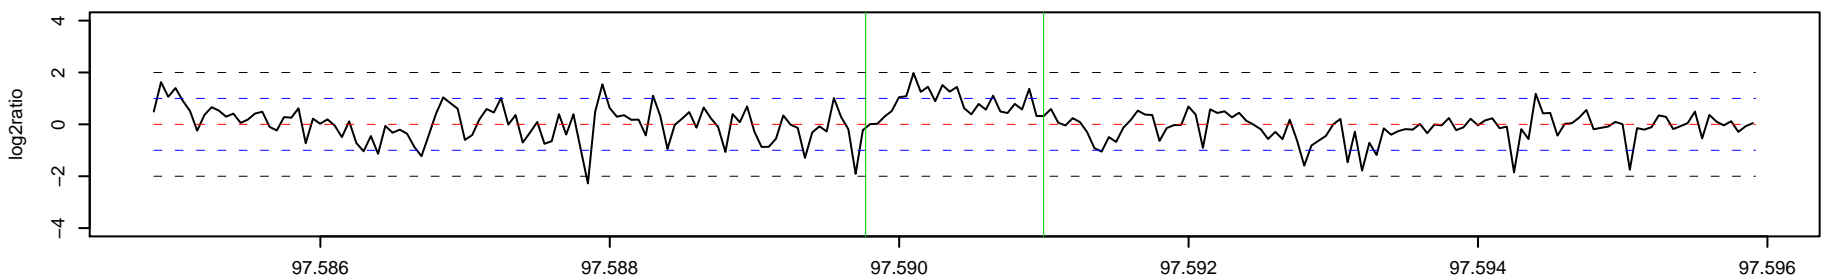

369\_AK1 Chr 8 : 108573848 – 108575521 , 1674 bp (aCGH relative log2ratio= -0.96 )

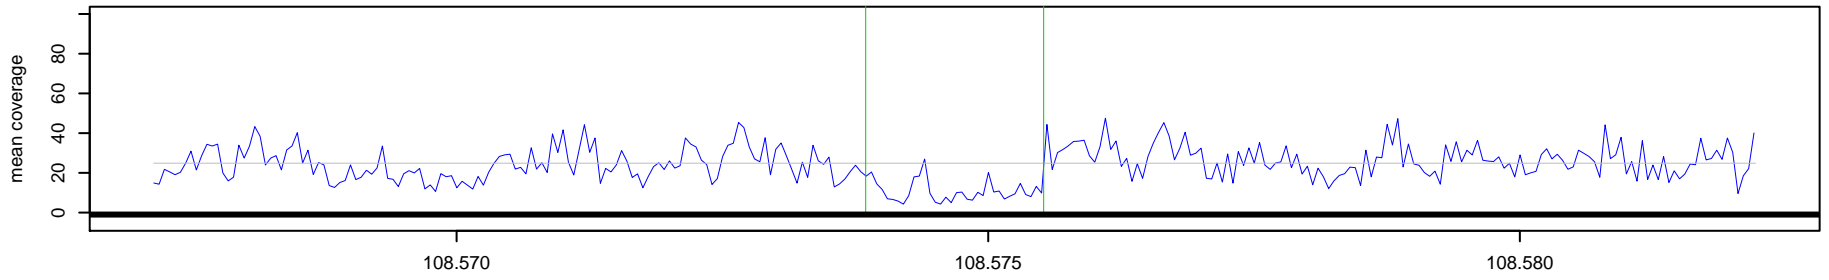

369\_NA10851 Chr 8 : 108573848 – 108575521 , 1674 bp (aCGH relative log2ratio= -0.96 )

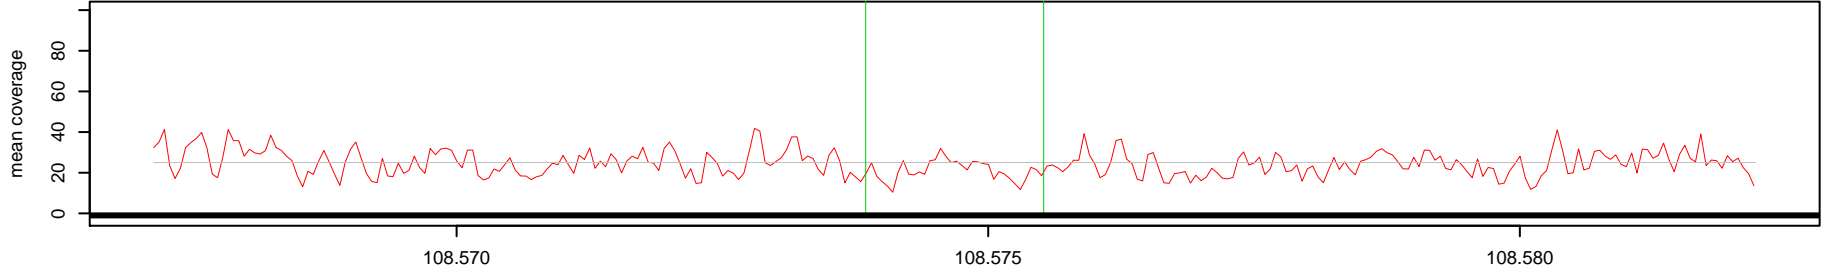

Log2( AK1 read depth / NA10851 read depth)

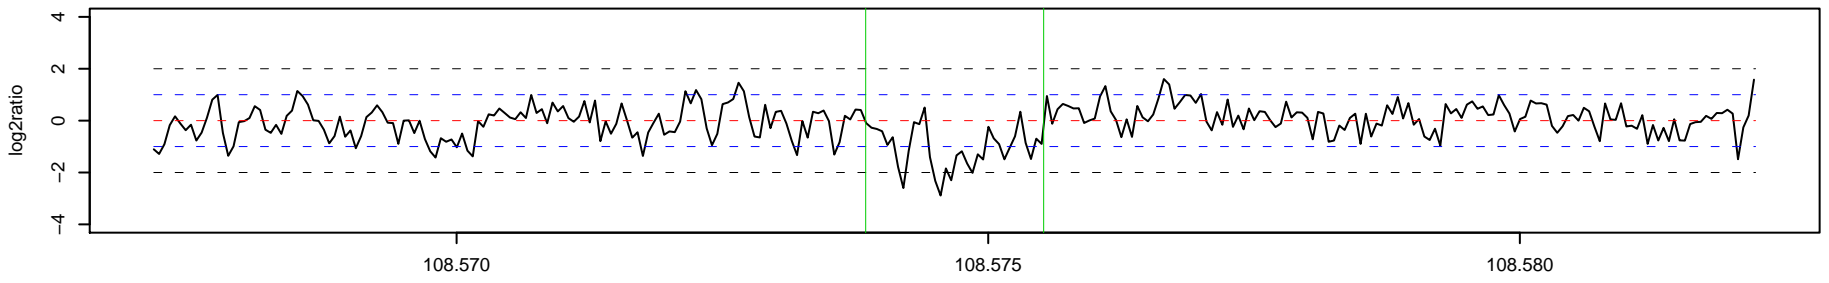

370\_AK1 Chr 8 : 108850558 – 108851156 , 599 bp (aCGH relative log2ratio= -1.10 )

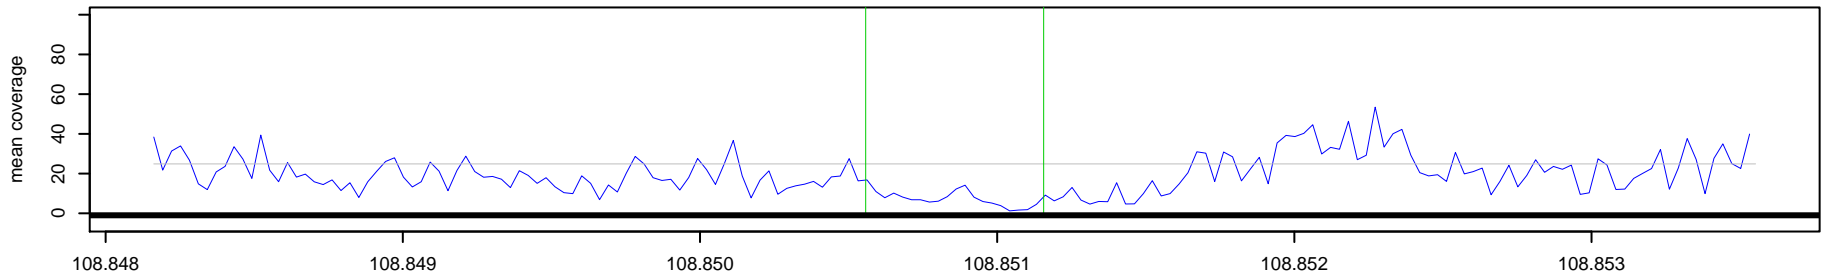

370\_NA10851 Chr 8 : 108850558 – 108851156 , 599 bp (aCGH relative log2ratio= -1.10 )

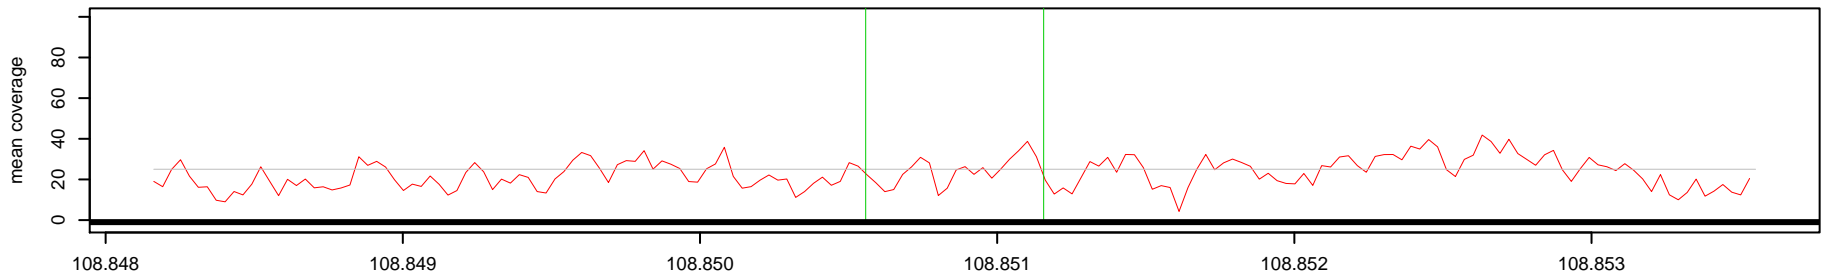

Log2( AK1 read depth / NA10851 read depth)

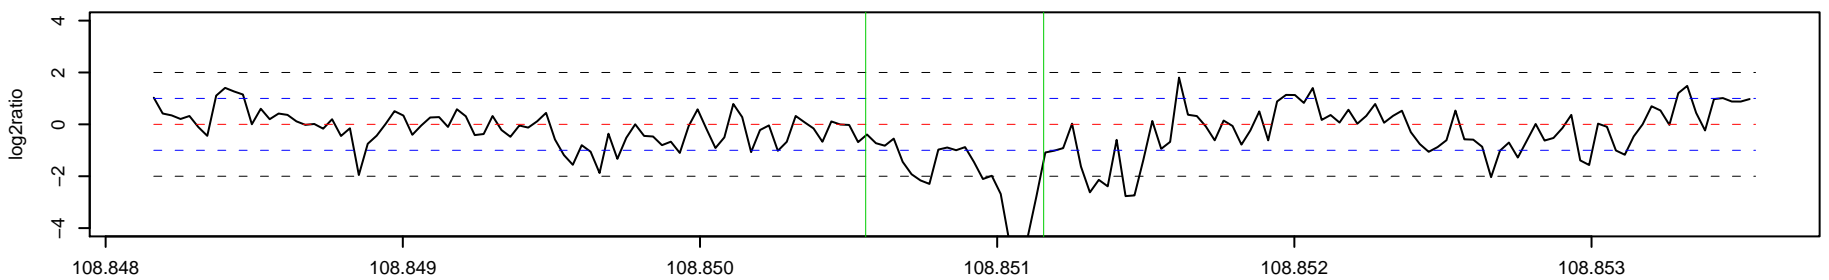

371\_AK1 Chr 8 : 112363239 – 112365639 , 2401 bp (aCGH relative log2ratio= 2.92 )

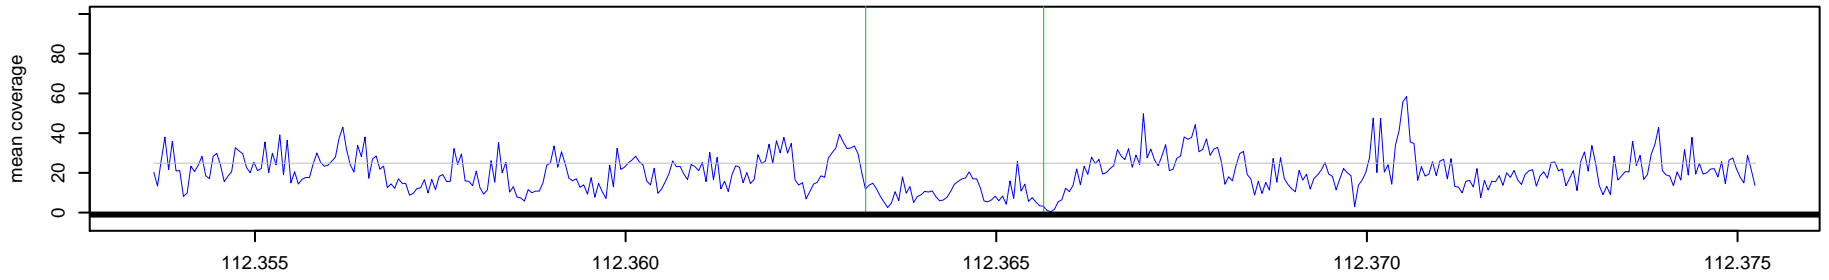

371\_NA10851 Chr 8 : 112363239 – 112365639 , 2401 bp (aCGH relative log2ratio= 2.92 )

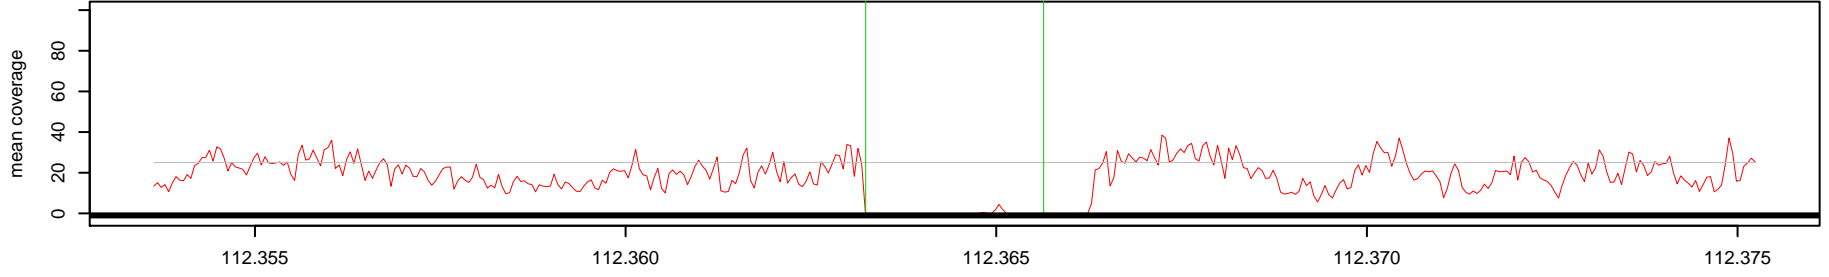

Log2( AK1 read depth / NA10851 read depth)

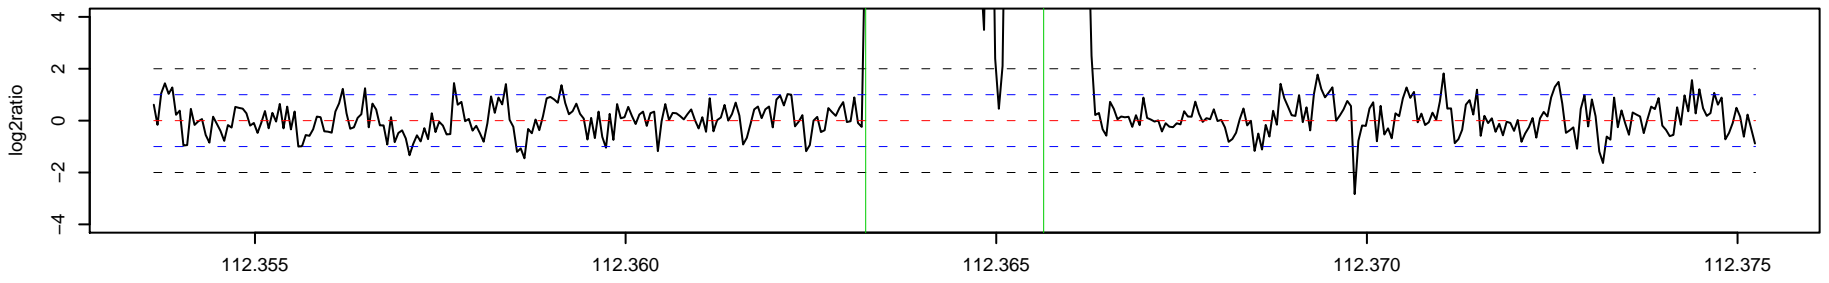

372\_AK1 Chr 8 : 115376874 – 115378035 , 1162 bp (aCGH relative log2ratio= 0.76 )

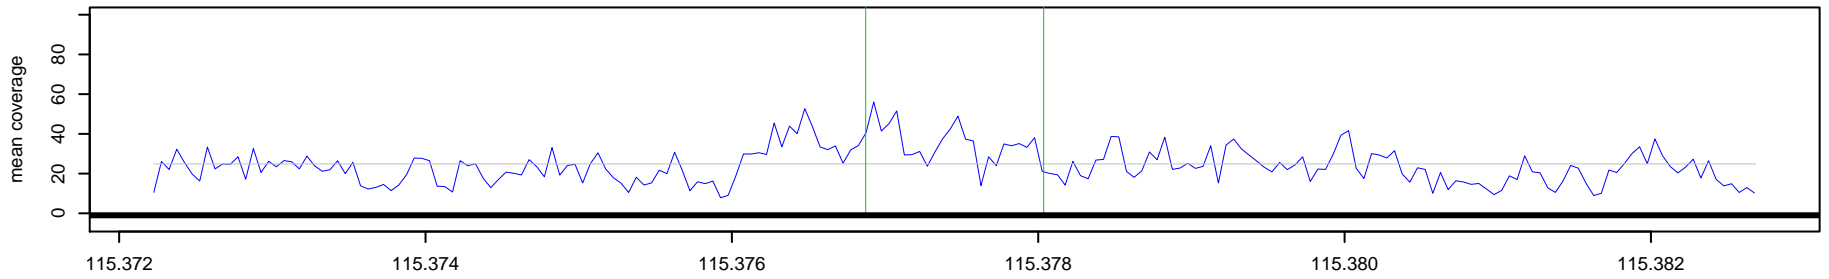

372\_NA10851 Chr 8 : 115376874 – 115378035 , 1162 bp (aCGH relative log2ratio= 0.76 )

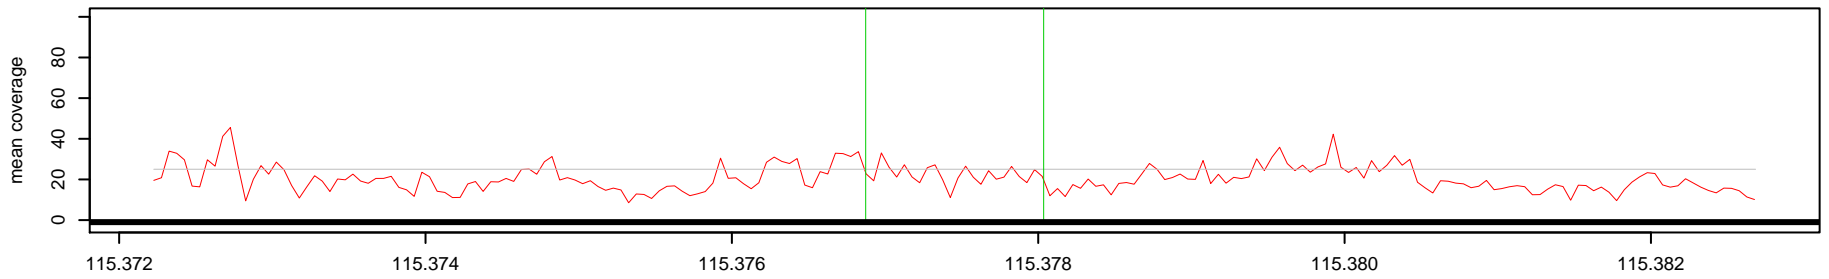

Log2( AK1 read depth / NA10851 read depth)

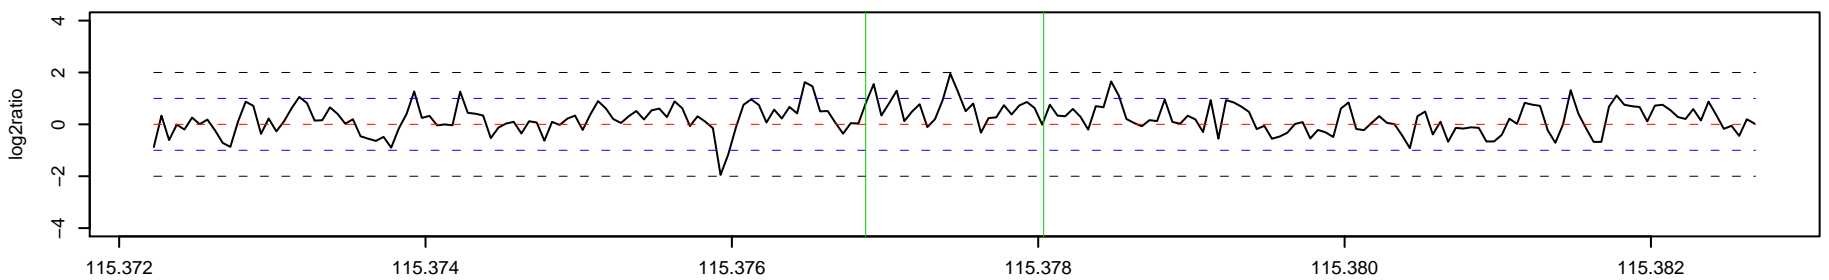

373 \_ AK1 Chr 8 : 120224835 – 120230327 , 5493 bp (aCGH relative log2ratio= 0.95 )

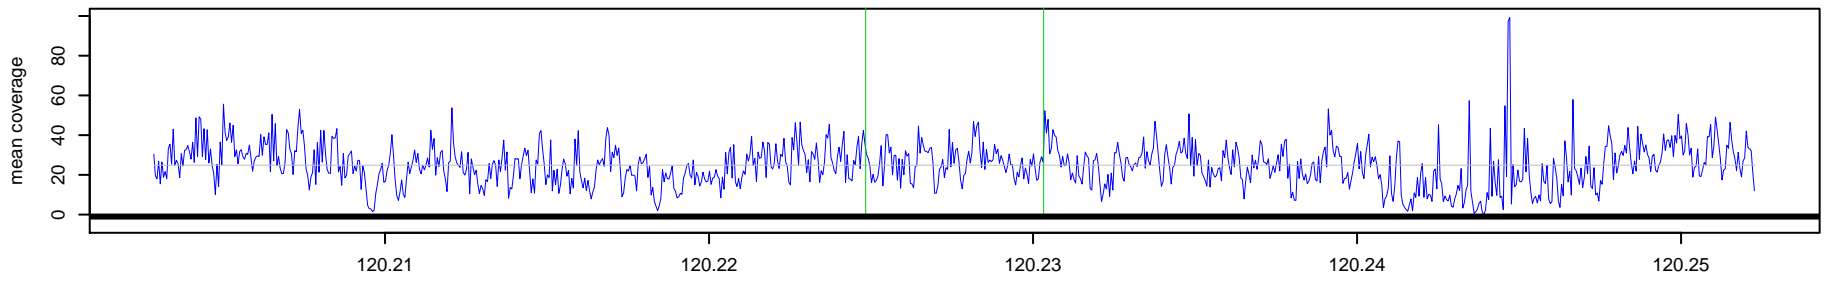

373 \_ NA10851 Chr 8 : 120224835 – 120230327 , 5493 bp (aCGH relative log2ratio= 0.95 )

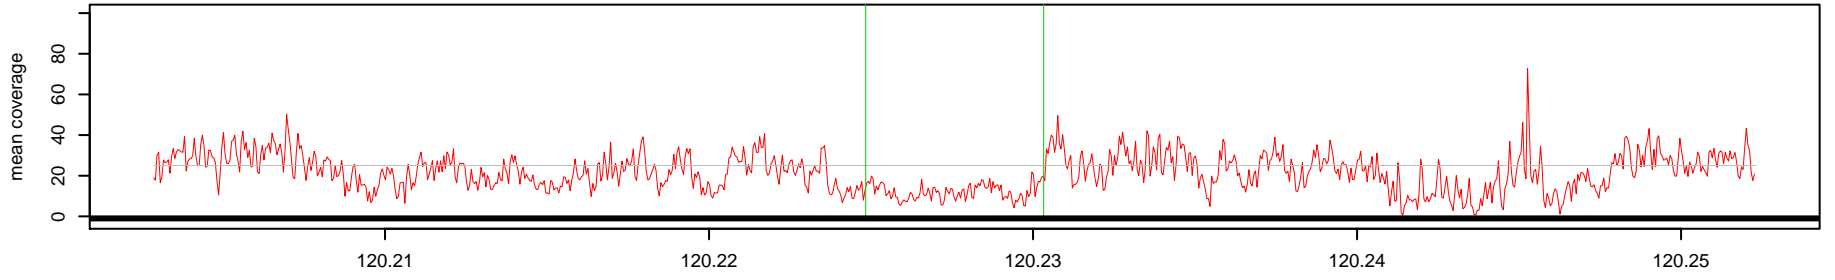

Log2( AK1 read depth / NA10851 read depth)

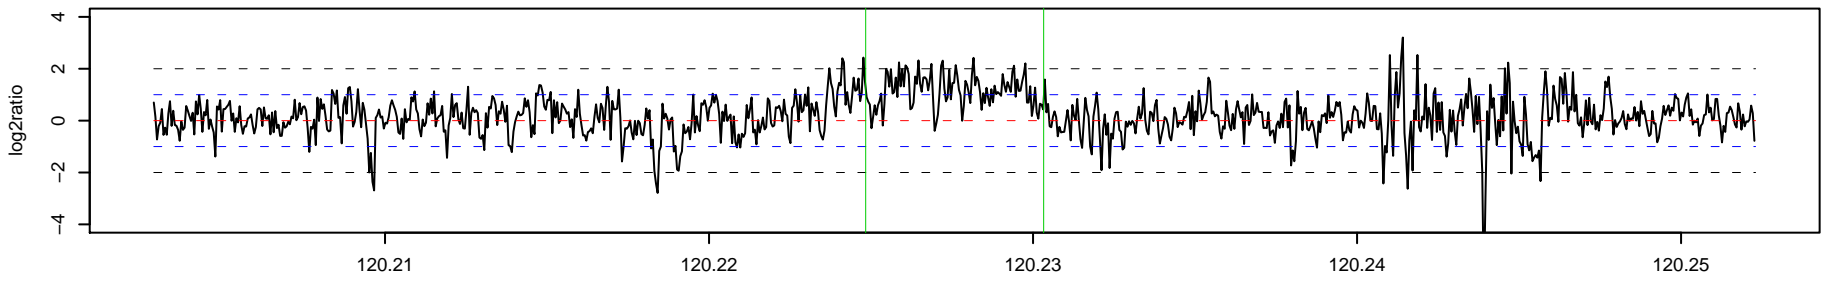

374 \_ AK1 Chr 8 : 122250171 – 122250712 , 542 bp (aCGH relative log2ratio= -0.51 )

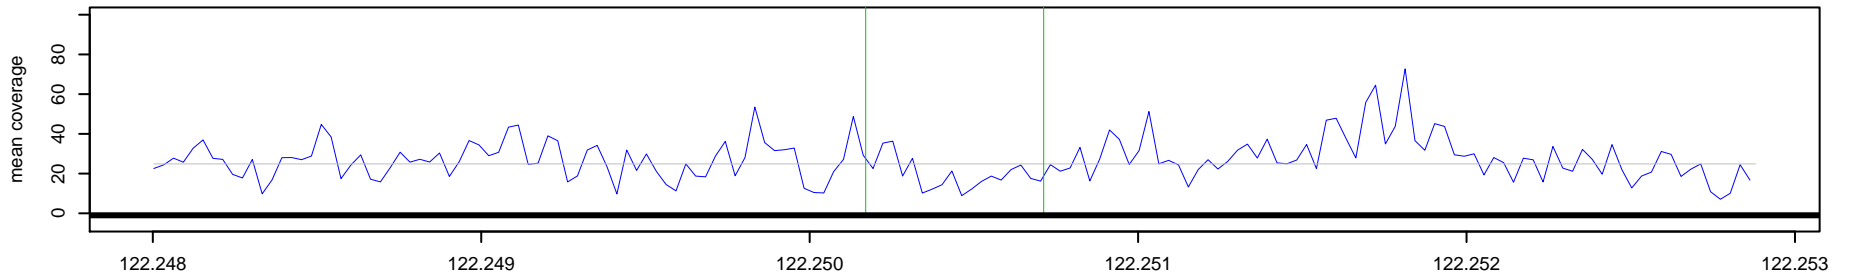

374 \_ NA10851 Chr 8 : 122250171 – 122250712 , 542 bp (aCGH relative log2ratio= -0.51 )

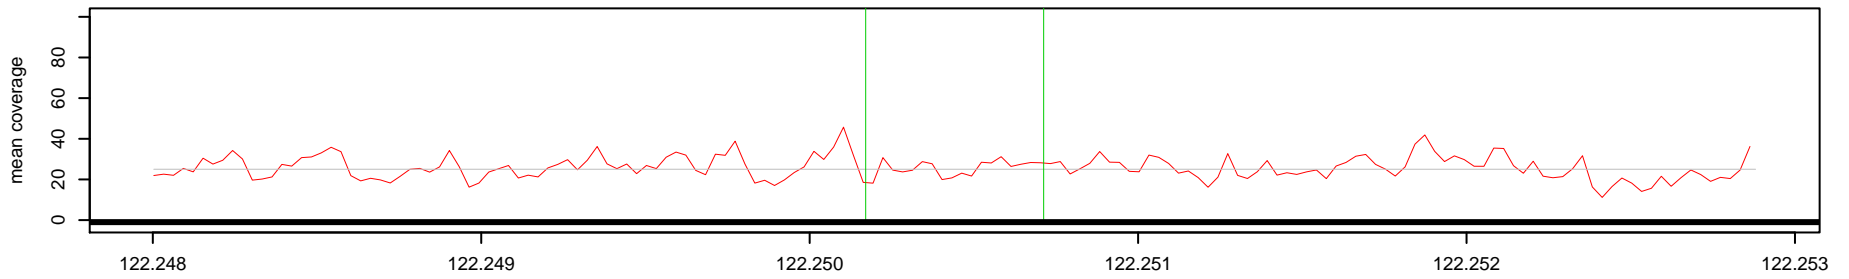

Log2( AK1 read depth / NA10851 read depth)

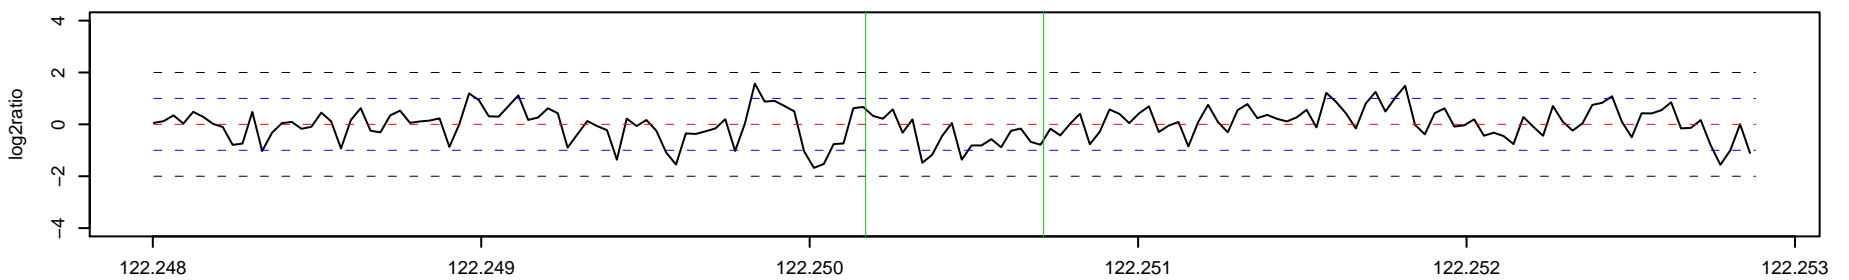

375 \_ AK1 Chr 8 : 131920036 – 131921967 , 1932 bp (aCGH relative log2ratio= 0.68 )

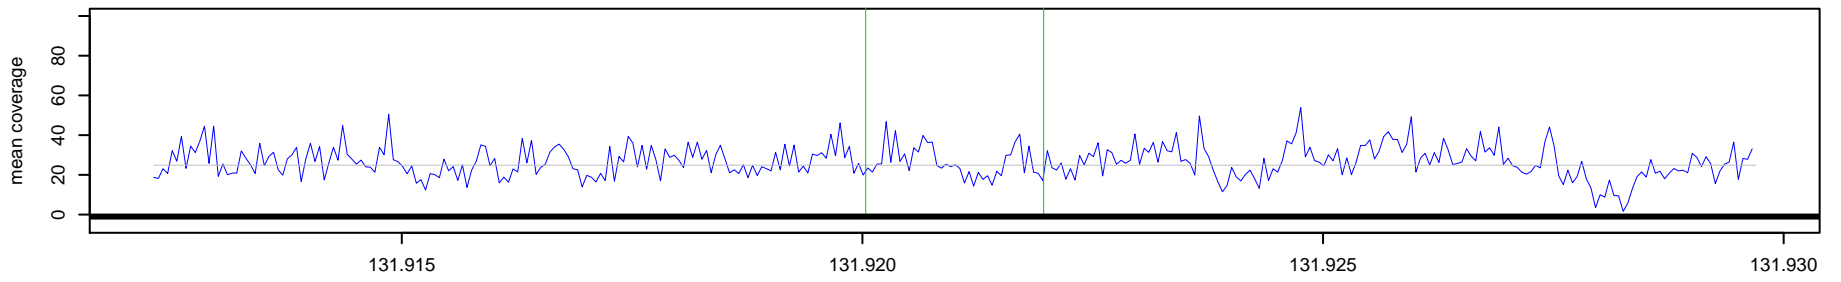

375 \_ NA10851 Chr 8 : 131920036 – 131921967 , 1932 bp (aCGH relative log2ratio= 0.68 )

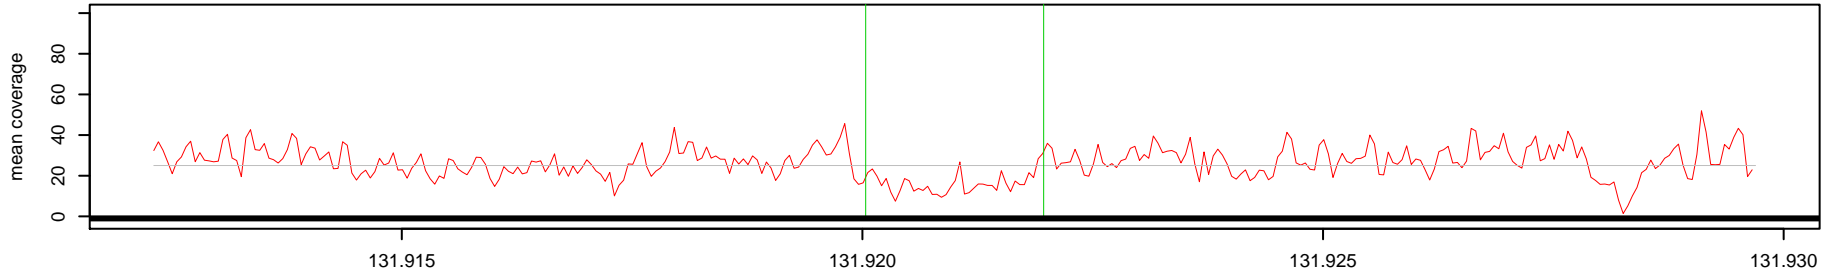

Log2( AK1 read depth / NA10851 read depth)

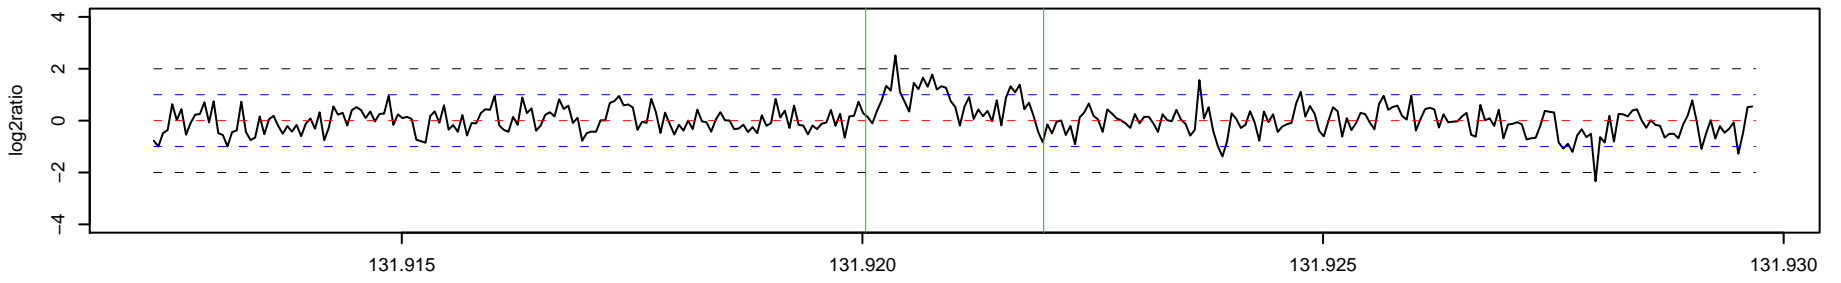

376 \_ AK1 Chr 8 : 135128600 – 135137307 , 8708 bp (aCGH relative log2ratio= -0.98 )

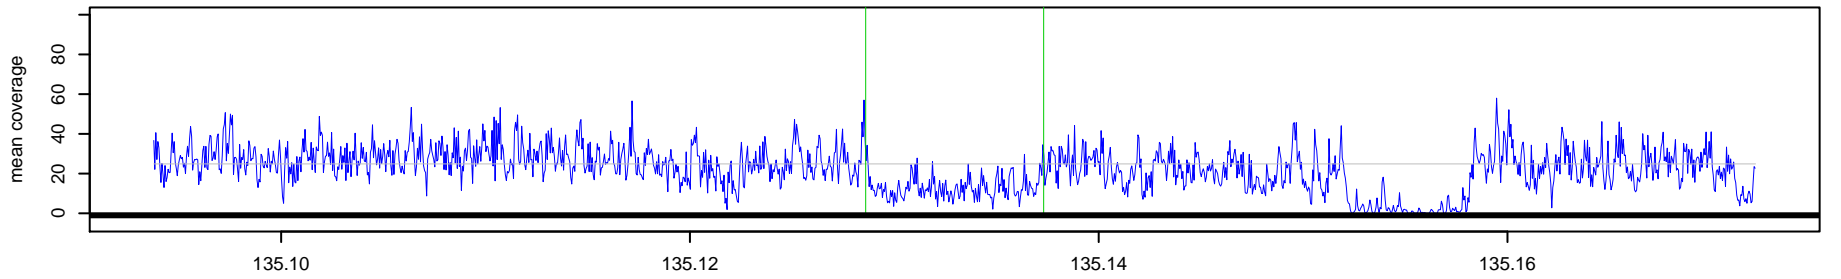

376 \_ NA10851 Chr 8 : 135128600 – 135137307 , 8708 bp (aCGH relative log2ratio= -0.98 )

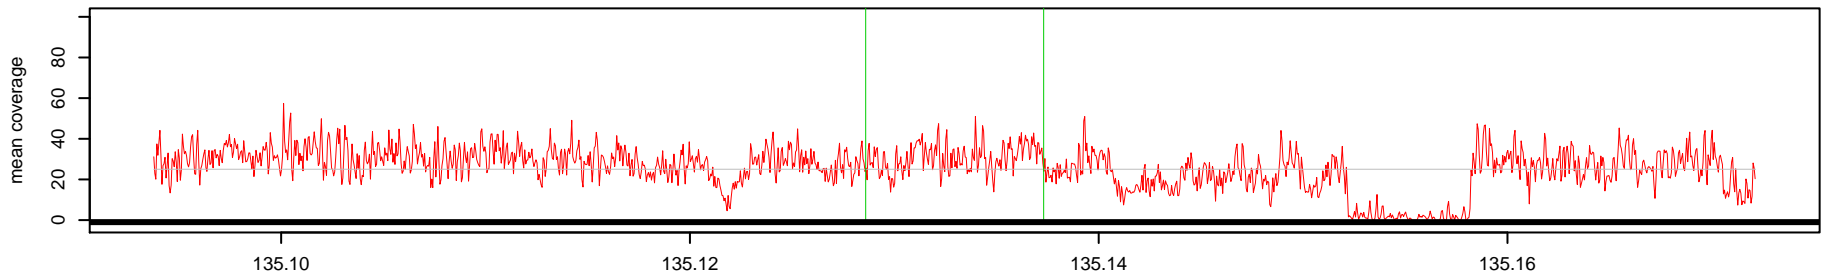

Log2( AK1 read depth / NA10851 read depth)

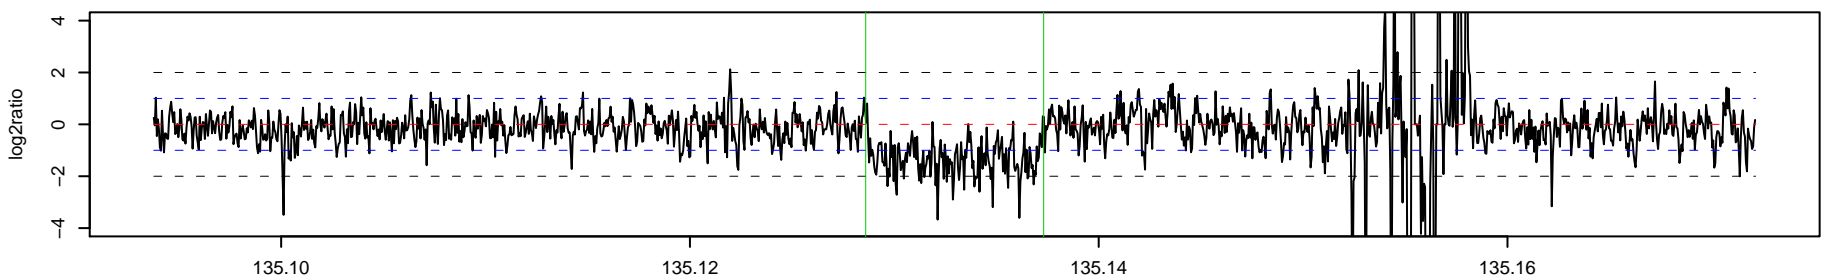



377 \_ AK1 Chr 8 : 137231557 – 137233125 , 1569 bp (aCGH relative log2ratio= 0.66 )

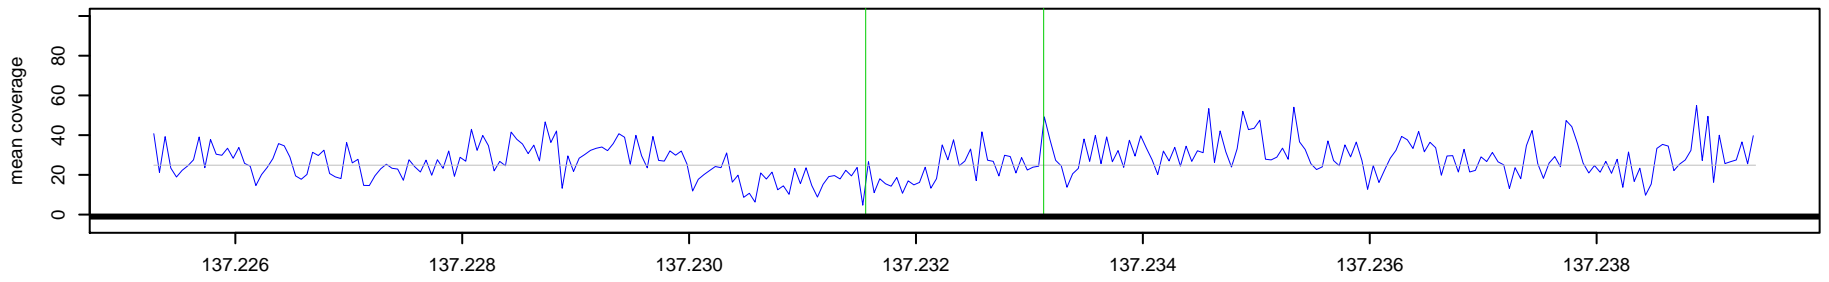

377 \_ NA10851 Chr 8 : 137231557 – 137233125 , 1569 bp (aCGH relative log2ratio= 0.66 )

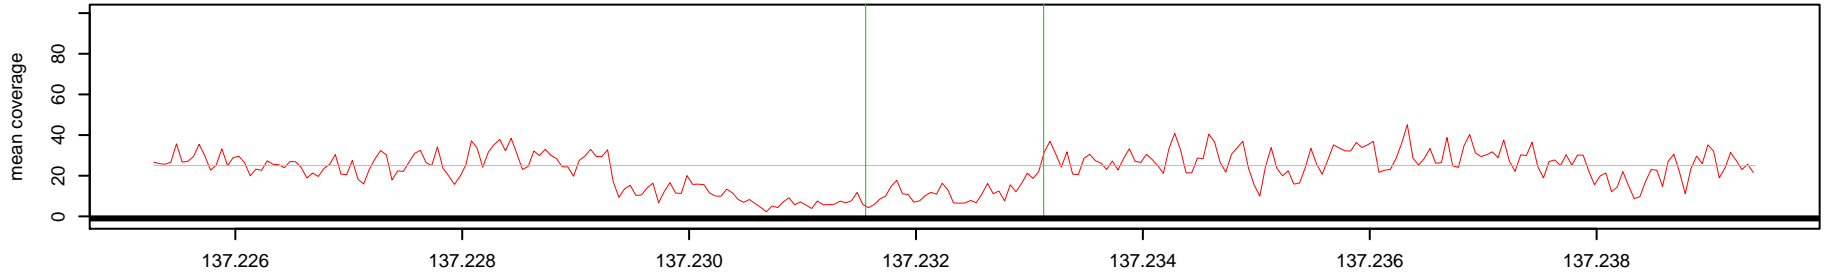

Log2( AK1 read depth / NA10851 read depth)

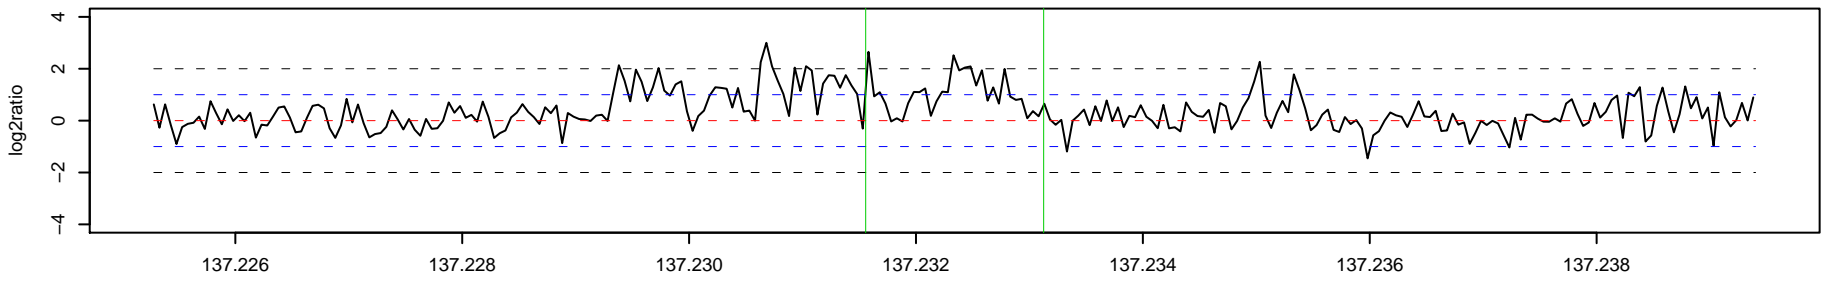

378 \_ AK1 Chr 8 : 144785340 – 144785889 , 550 bp (aCGH relative log2ratio= 0.52 )

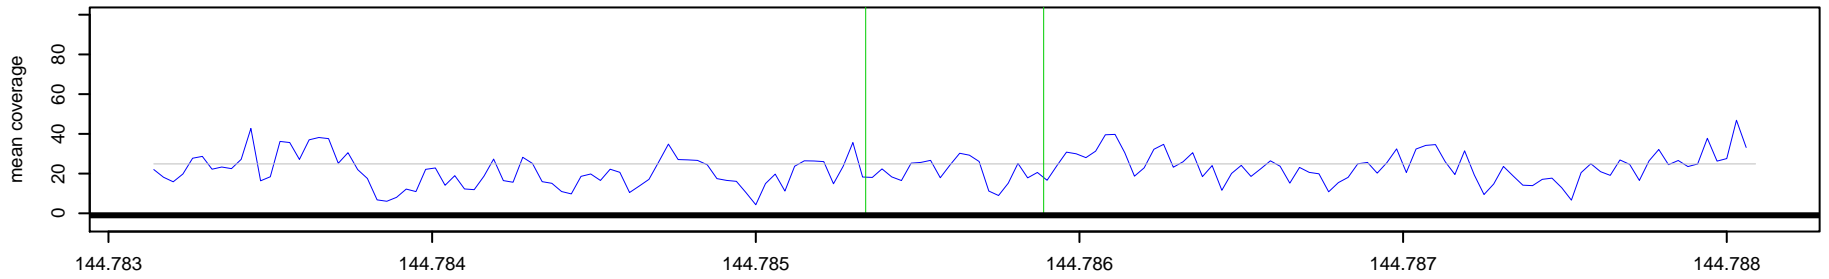

378 \_ NA10851 Chr 8 : 144785340 – 144785889 , 550 bp (aCGH relative log2ratio= 0.52 )

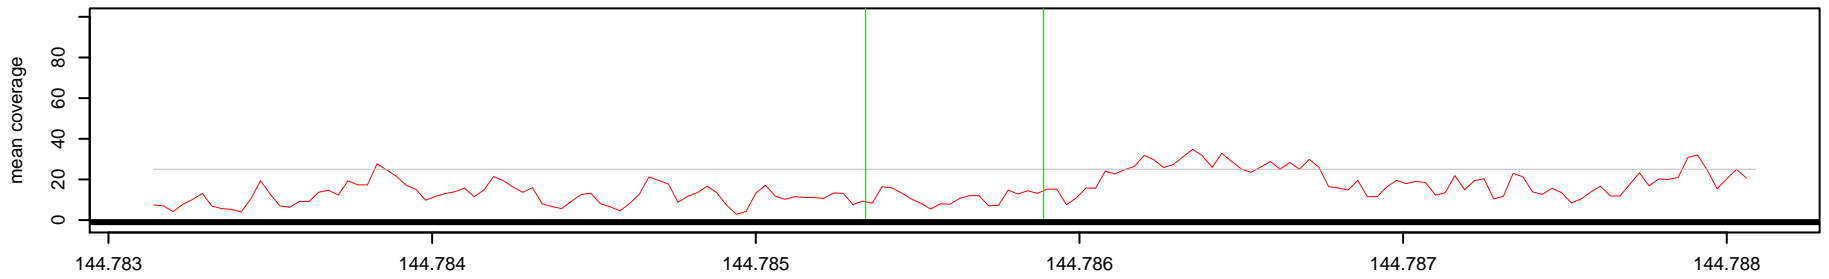

Log2( AK1 read depth / NA10851 read depth)

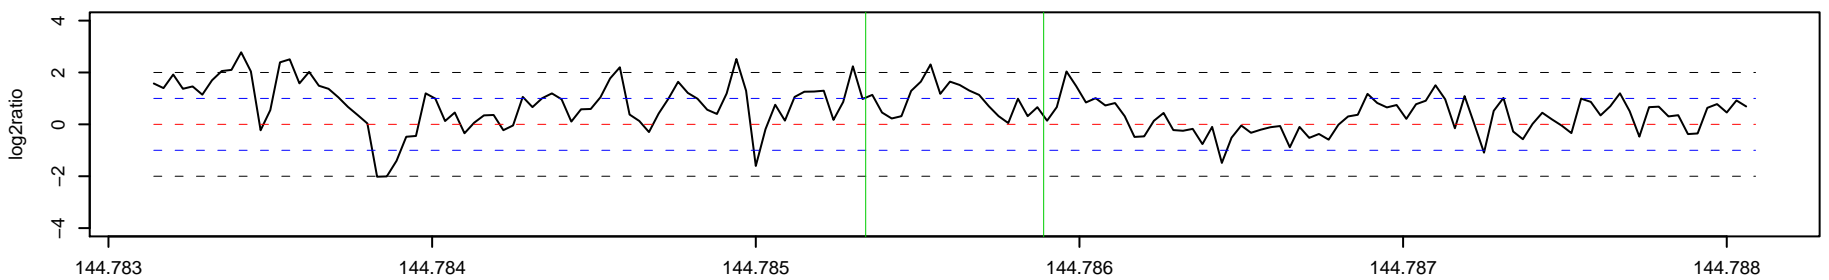

379\_AK1 Chr 9 : 6002087 – 6004233 , 2147 bp (aCGH relative log2ratio= 0.34 )

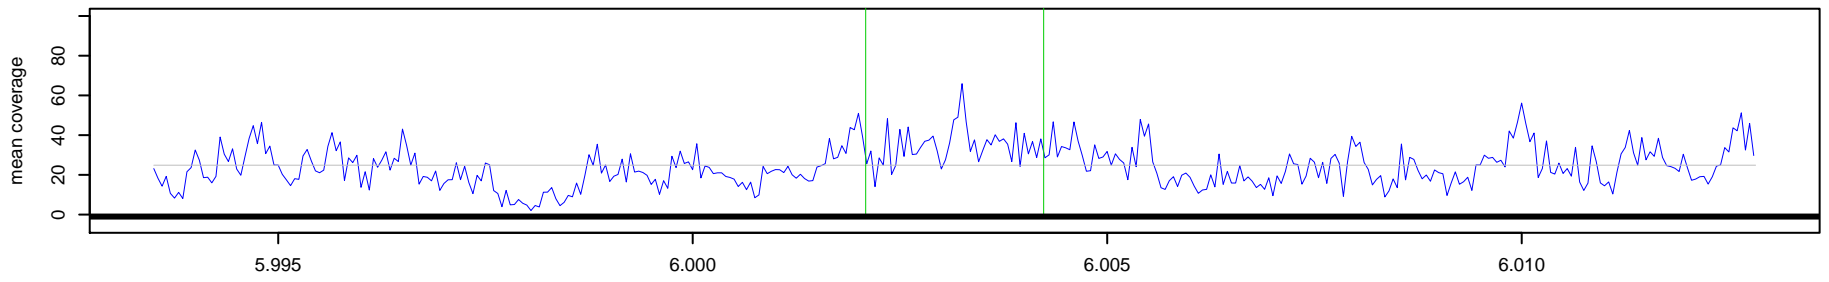

379\_NA10851 Chr 9 : 6002087 – 6004233 , 2147 bp (aCGH relative log2ratio= 0.34 )

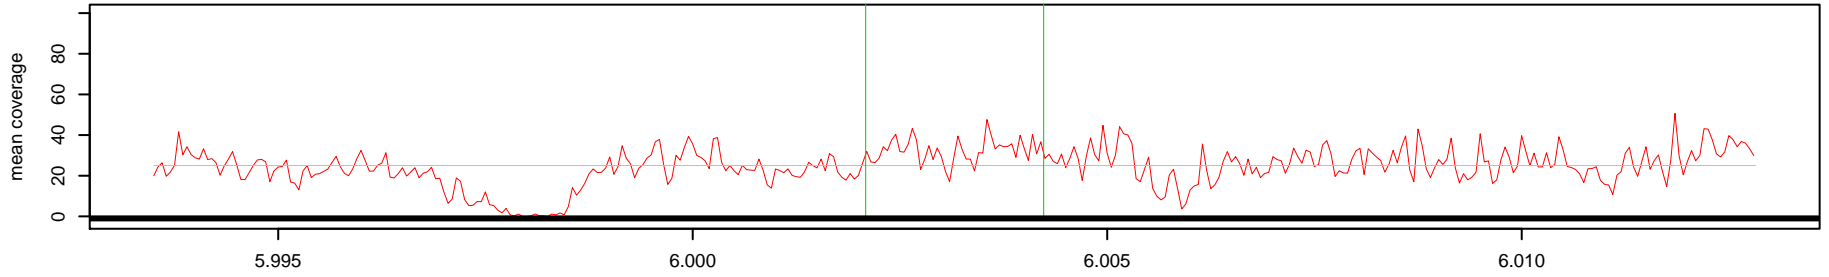

Log2( AK1 read depth / NA10851 read depth)

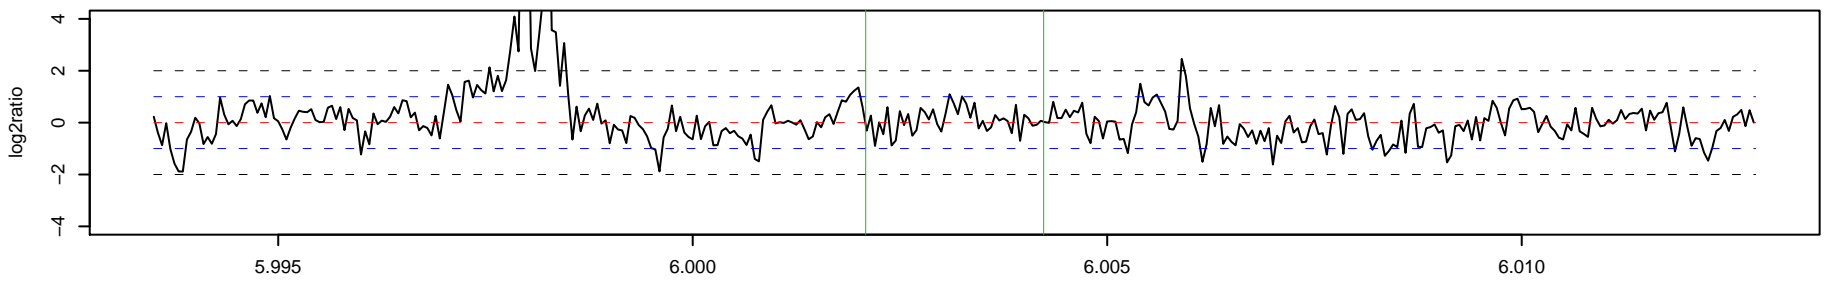

380\_AK1 Chr 9 : 22486382 – 22492613 , 6232 bp (aCGH relative log2ratio= 1.05 )

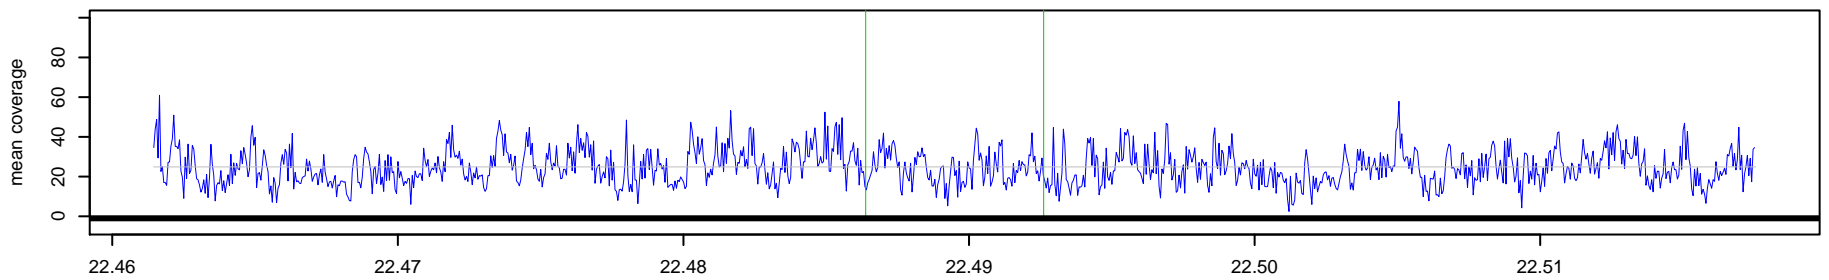

380\_NA10851 Chr 9 : 22486382 – 22492613 , 6232 bp (aCGH relative log2ratio= 1.05 )

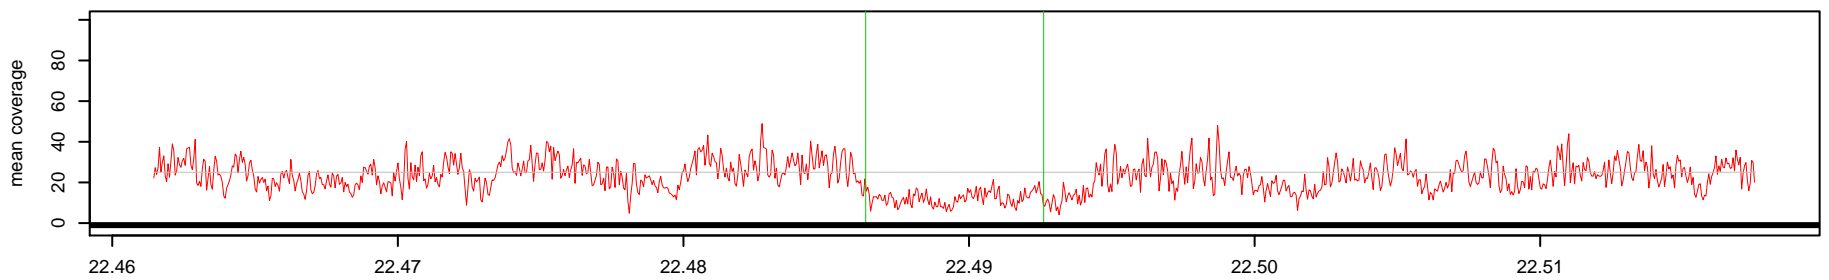

Log2( AK1 read depth / NA10851 read depth)

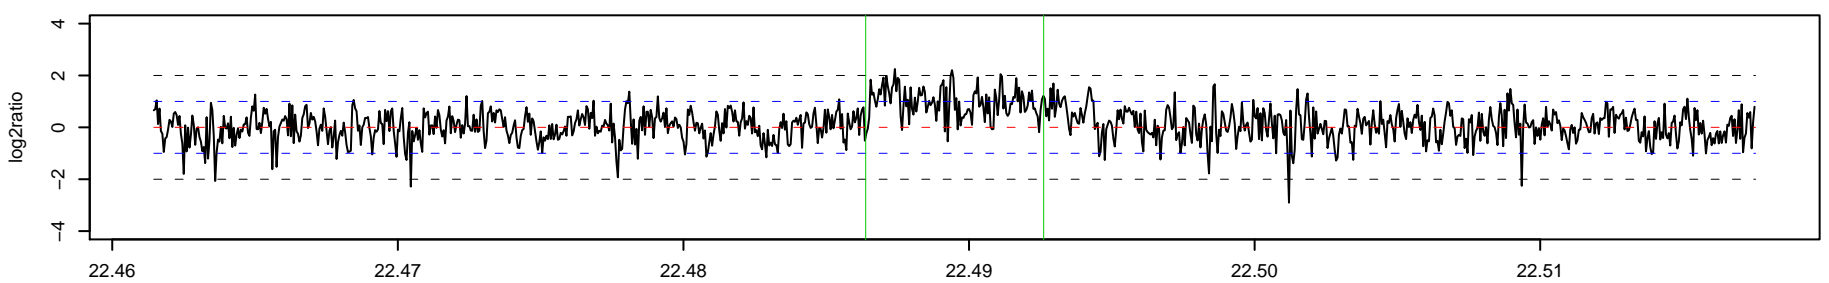

381 \_ AK1 Chr 9 : 23352826 – 23367647 , 14822 bp (aCGH relative log2ratio= -0.85 )

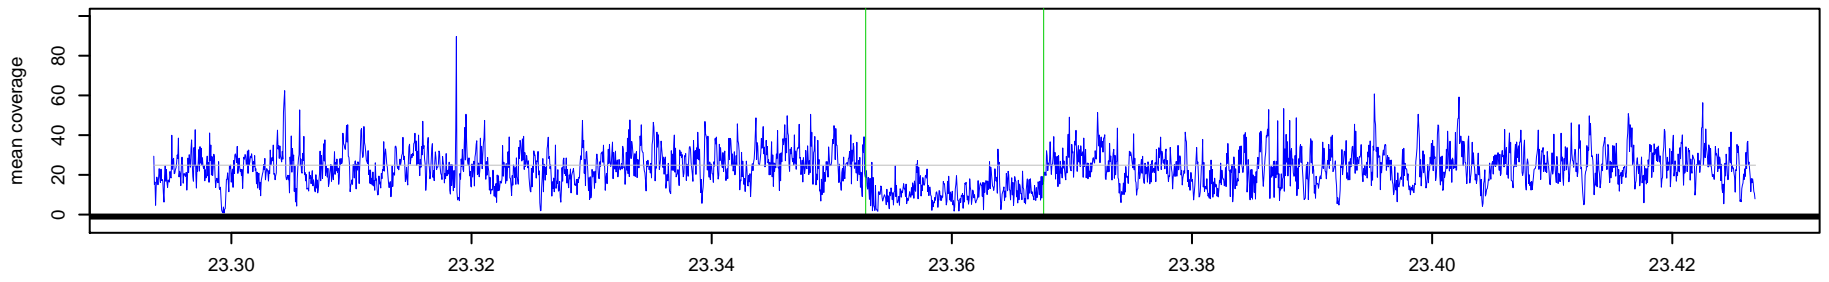

381 \_ NA10851 Chr 9 : 23352826 – 23367647 , 14822 bp (aCGH relative log2ratio= -0.85 )

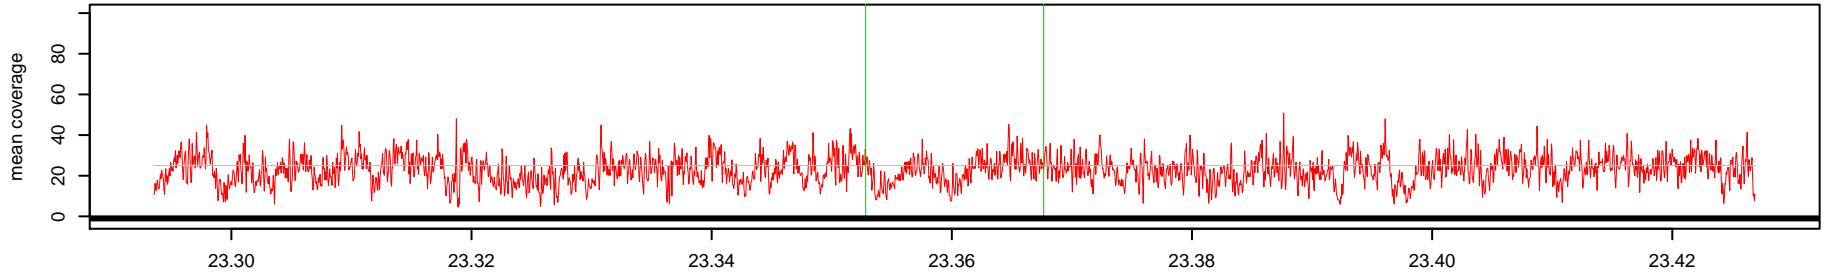

Log2( AK1 read depth / NA10851 read depth)

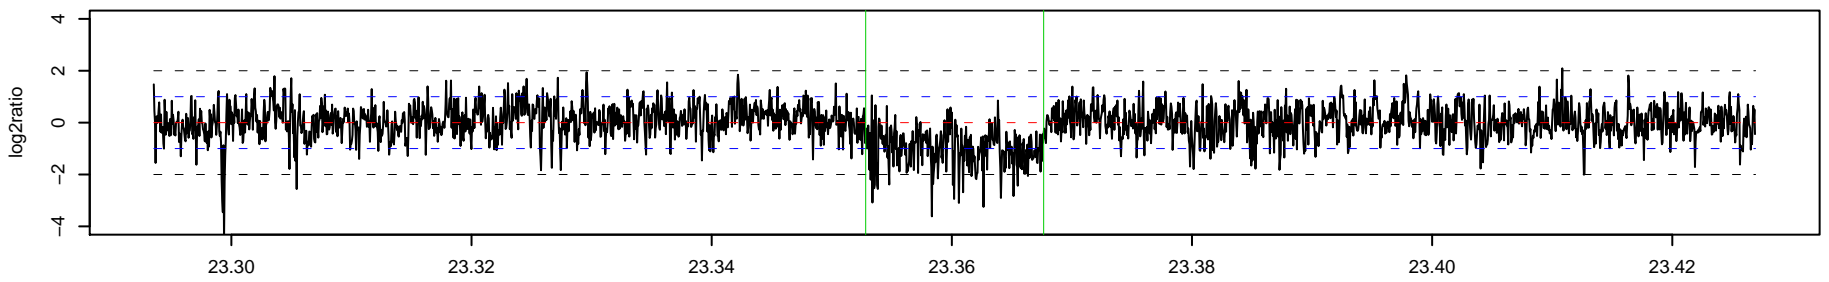

382 \_ AK1 Chr 9 : 25205328 – 25206098 , 771 bp (aCGH relative log2ratio= -0.83 )

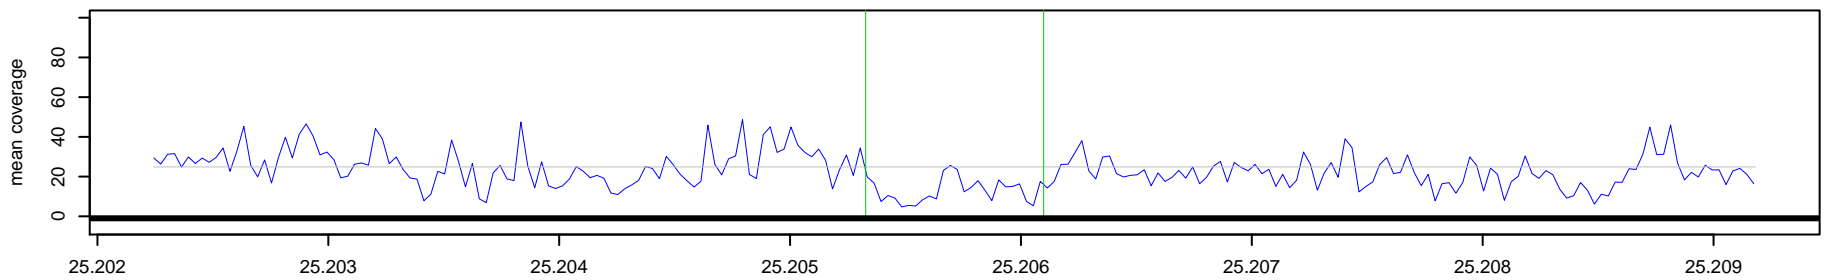

382 \_ NA10851 Chr 9 : 25205328 – 25206098 , 771 bp (aCGH relative log2ratio= -0.83 )

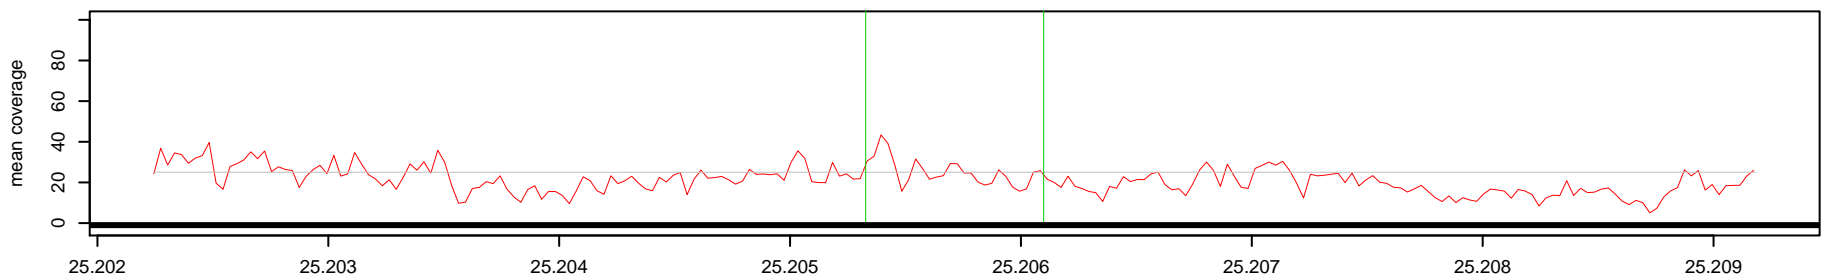

Log2( AK1 read depth / NA10851 read depth)

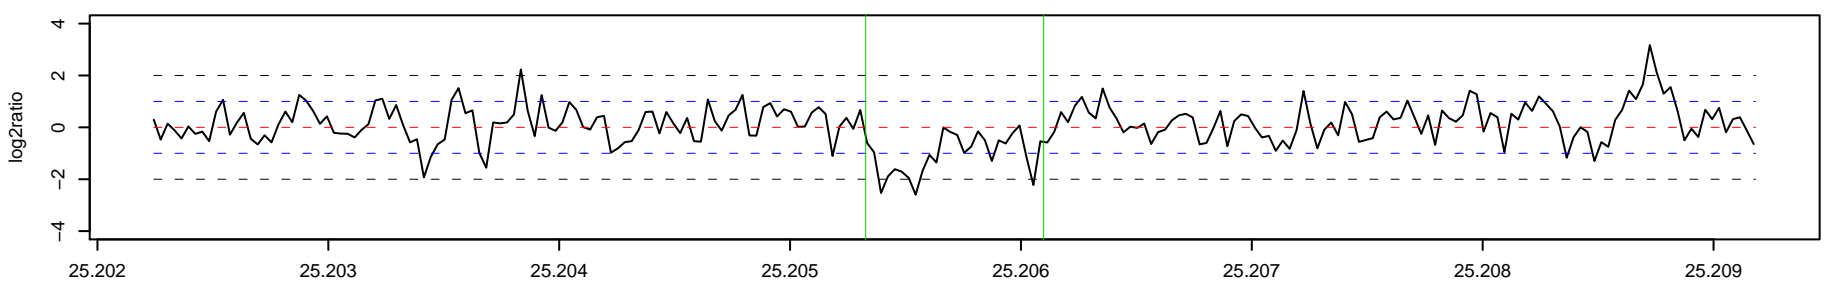

383\_AK1 Chr 9 : 28037341 - 28041233 , 3893 bp (aCGH relative log2ratio= -0.94 )

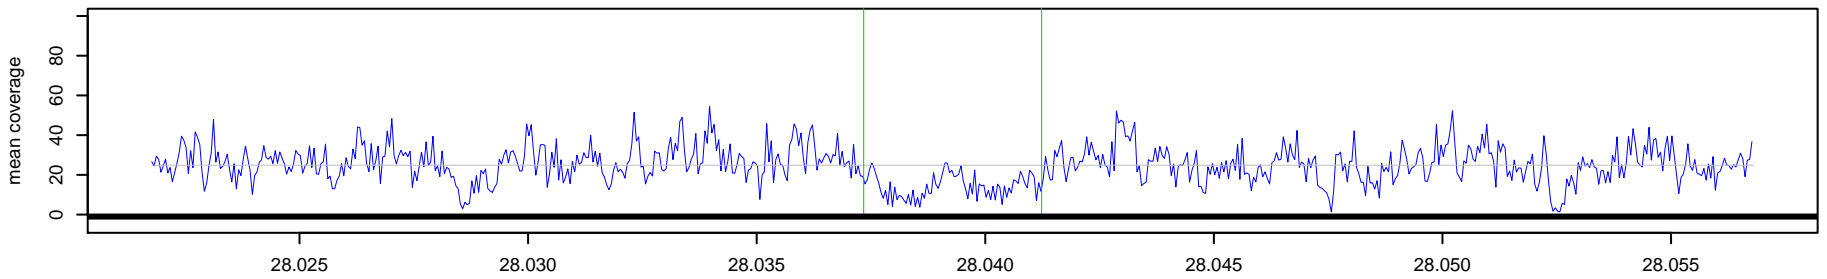

383\_NA10851 Chr 9 : 28037341 - 28041233 , 3893 bp (aCGH relative log2ratio= -0.94 )

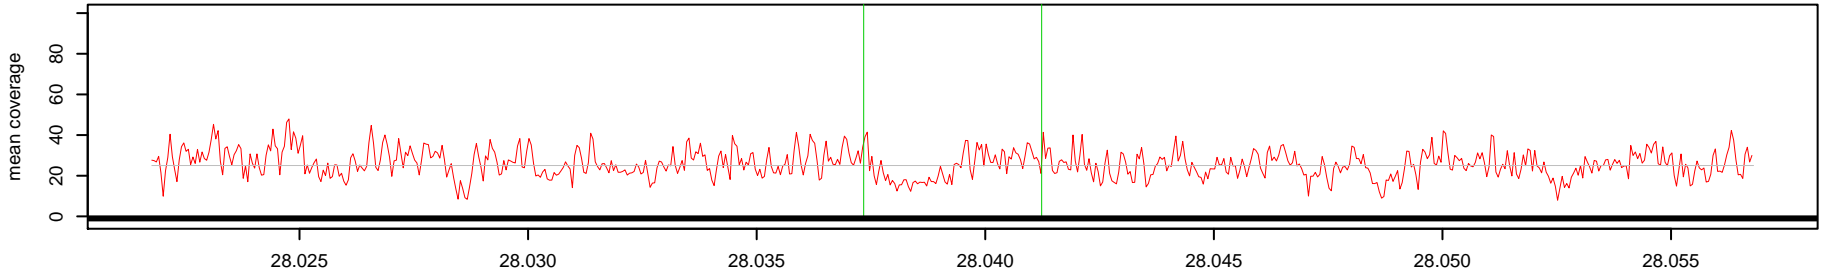

Log2( AK1 read depth / NA10851 read depth)

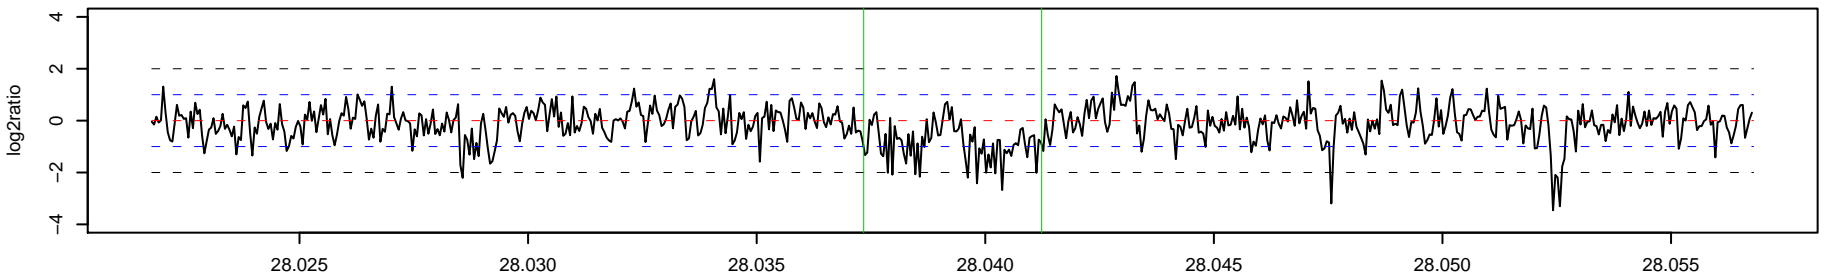

384\_AK1 Chr 9 : 28836331 - 28837833 , 1503 bp (aCGH relative log2ratio= -0.91 )

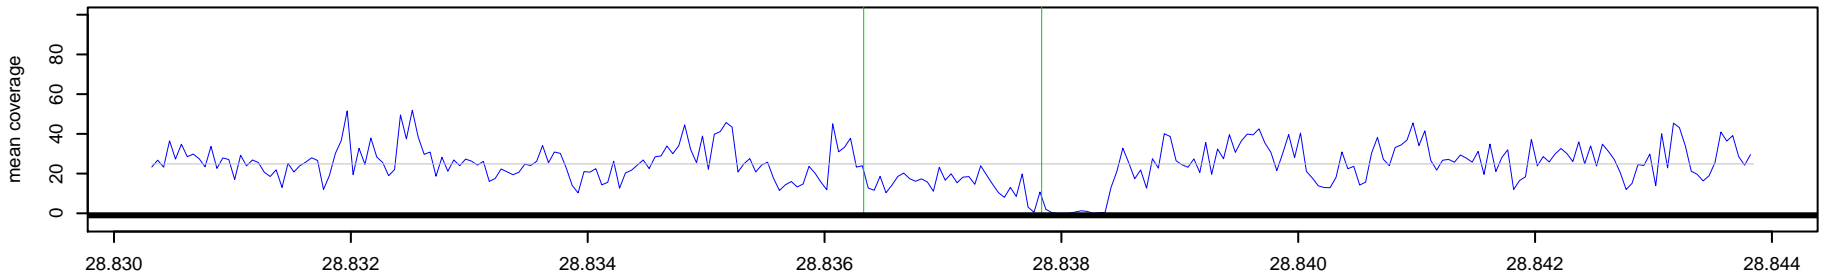

384\_NA10851 Chr 9 : 28836331 - 28837833 , 1503 bp (aCGH relative log2ratio= -0.91 )

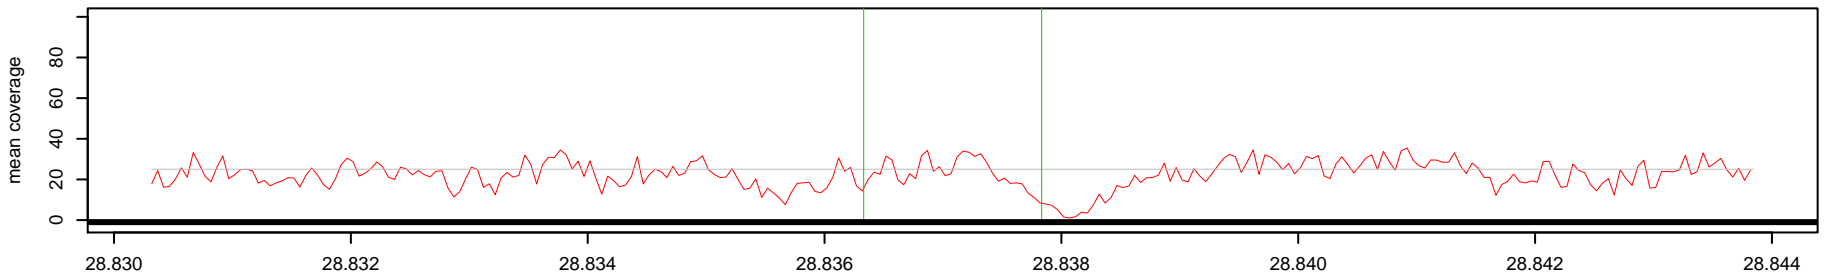

Log2( AK1 read depth / NA10851 read depth)

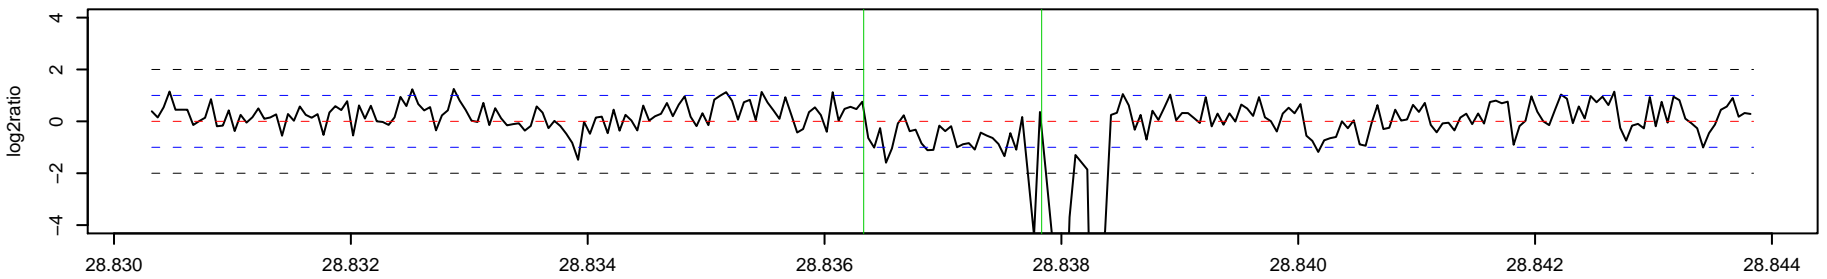

385\_AK1 Chr 9 : 29082592 – 29087970 , 5379 bp (aCGH relative log2ratio= -0.83 )

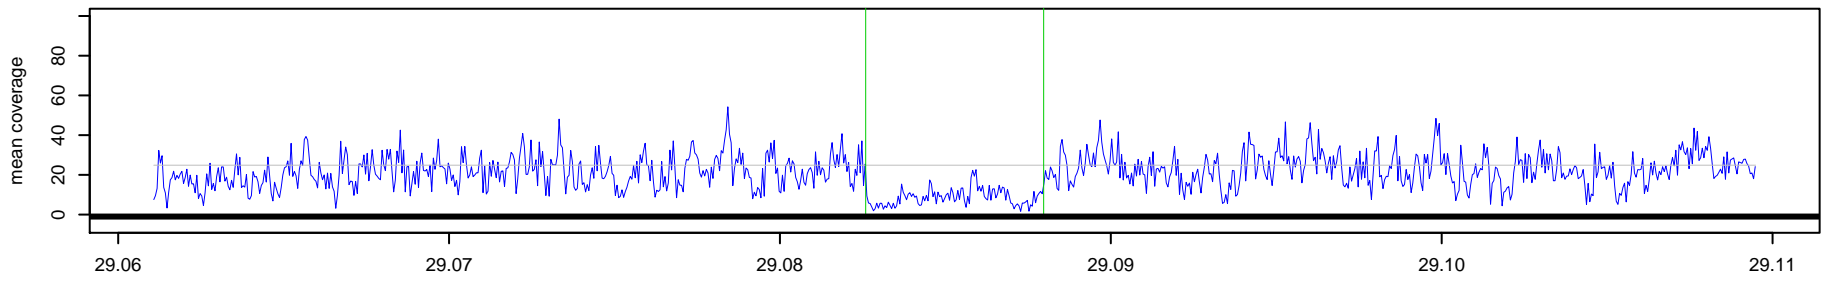

385\_NA10851 Chr 9 : 29082592 – 29087970 , 5379 bp (aCGH relative log2ratio= -0.83 )

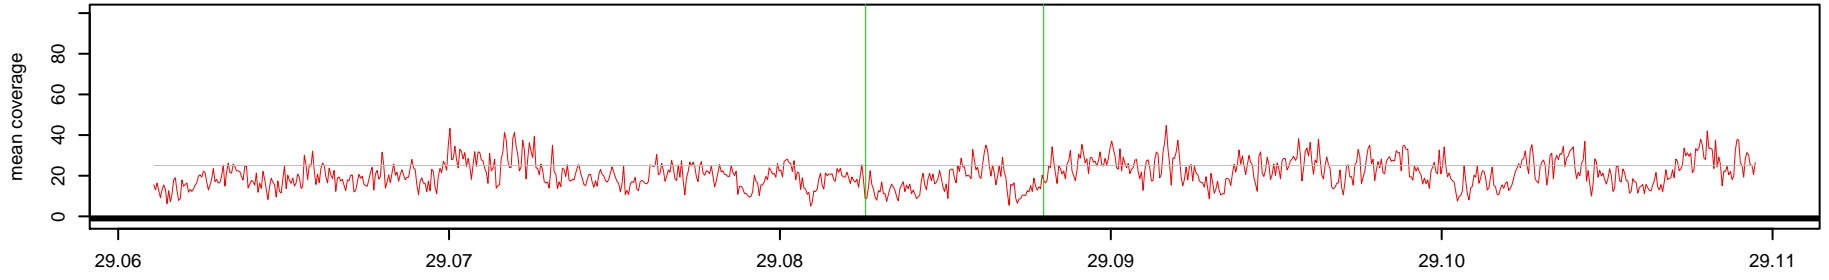

Log2( AK1 read depth / NA10851 read depth)

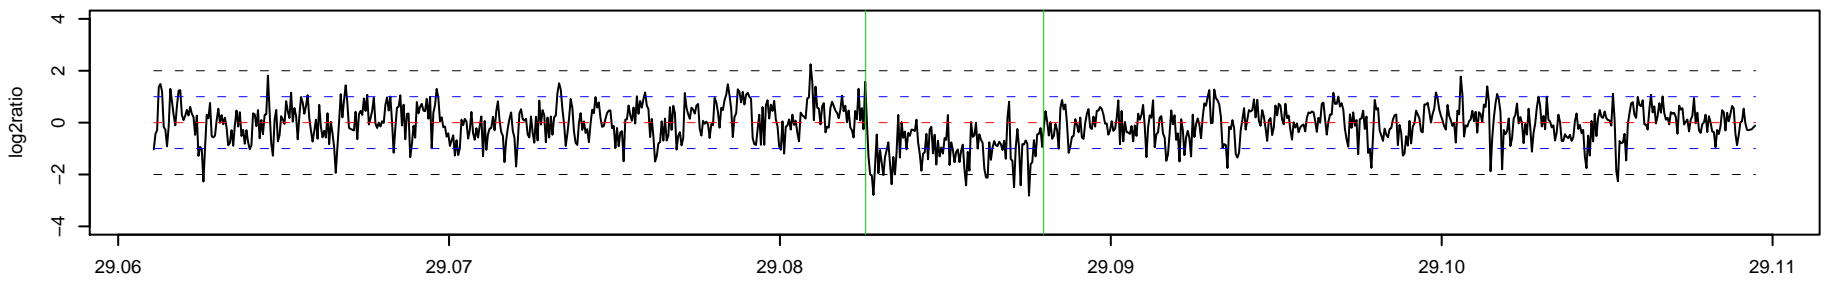

386\_AK1 Chr 9 : 33635896 – 33636646 , 751 bp (aCGH relative log2ratio= -0.58 )

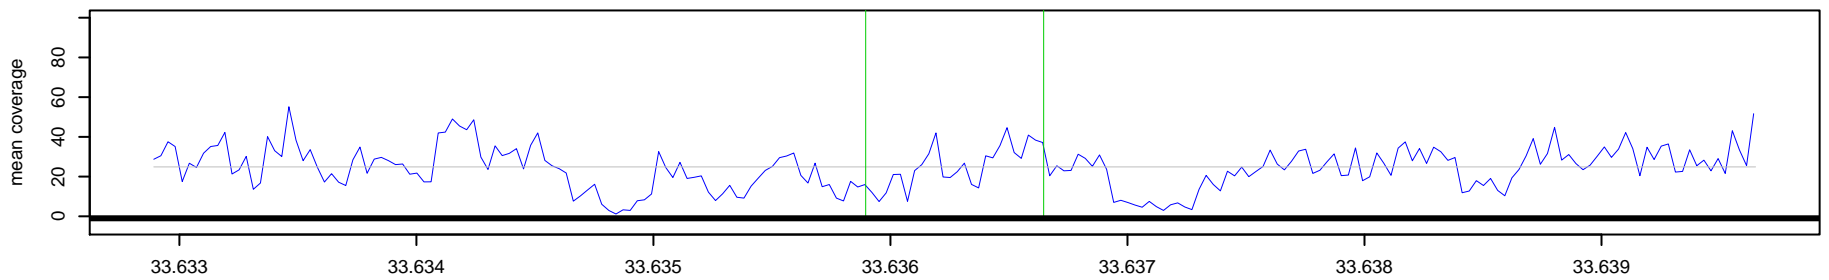

386\_NA10851 Chr 9 : 33635896 – 33636646 , 751 bp (aCGH relative log2ratio= -0.58 )

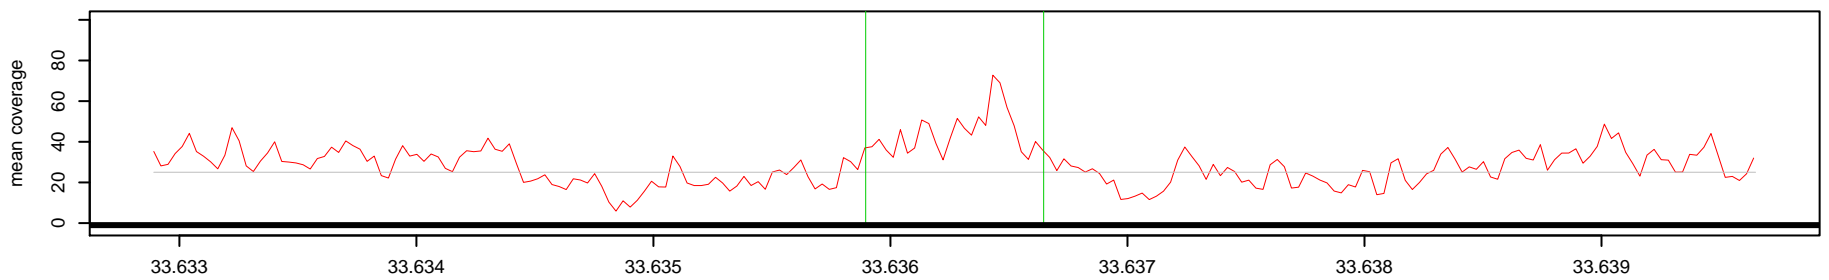

Log2( AK1 read depth / NA10851 read depth)

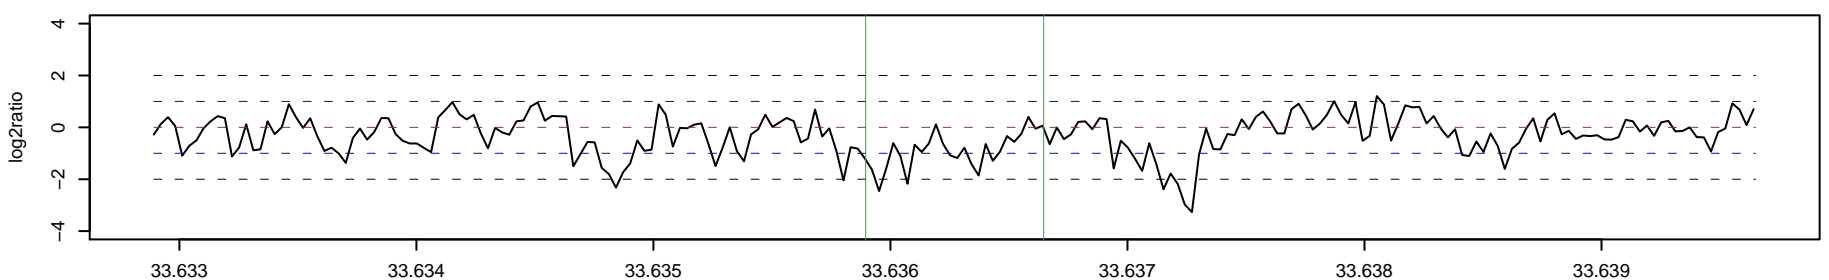

387\_AK1 Chr 9 : 34160997 – 34165247 , 4251 bp (aCGH relative log2ratio= -0.59 )

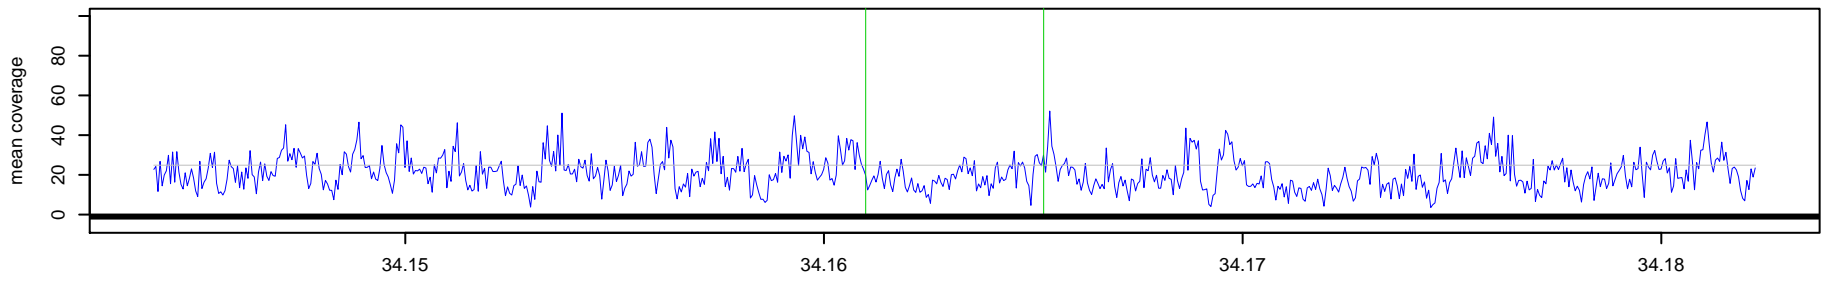

387\_NA10851 Chr 9 : 34160997 – 34165247 , 4251 bp (aCGH relative log2ratio= -0.59 )

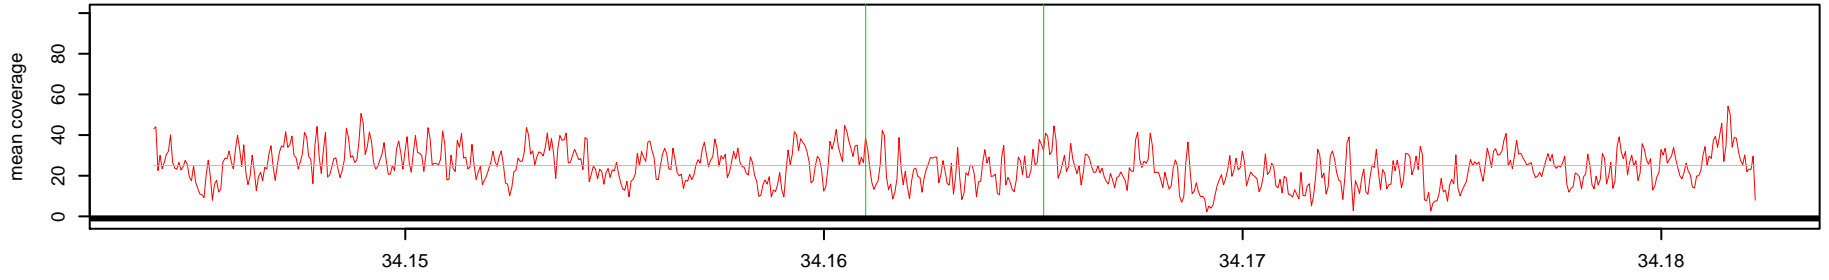

Log2( AK1 read depth / NA10851 read depth)

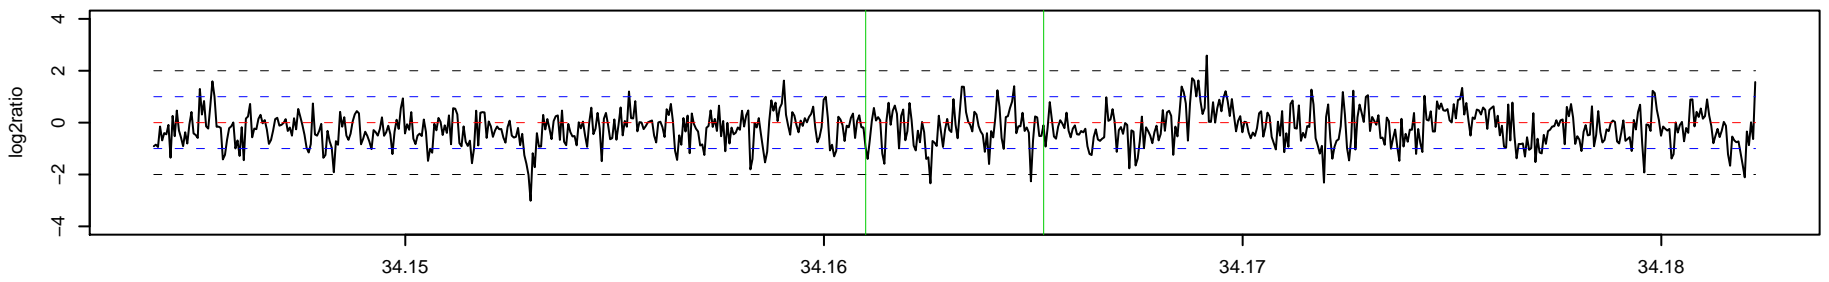

388\_AK1 Chr 9 : 41542869 – 43627120 , 2084252 bp (aCGH relative log2ratio= -0.55 )

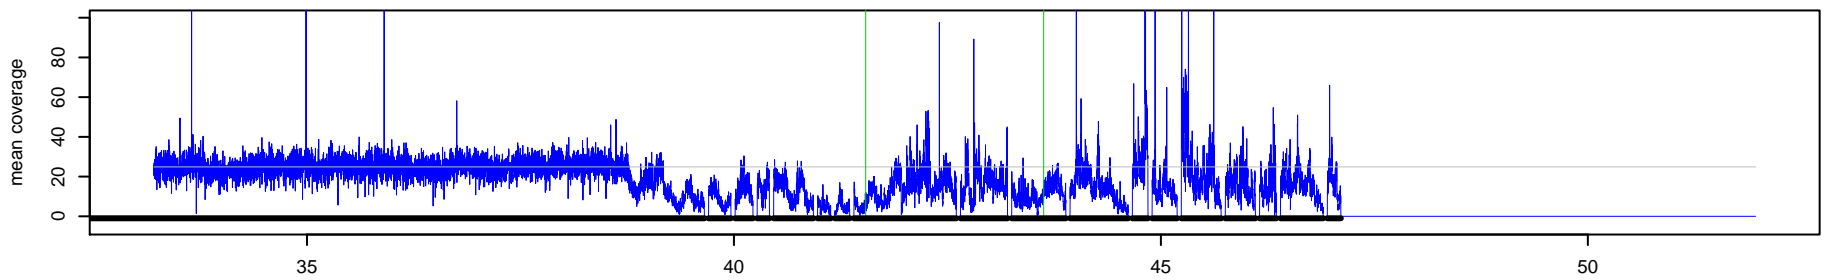

388\_NA10851 Chr 9 : 41542869 – 43627120 , 2084252 bp (aCGH relative log2ratio= -0.55 )

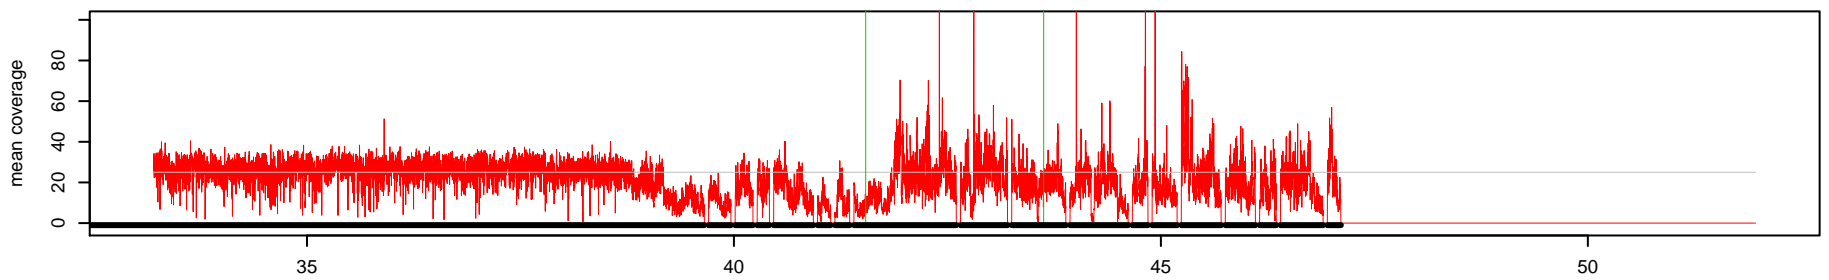

Log2( AK1 read depth / NA10851 read depth)

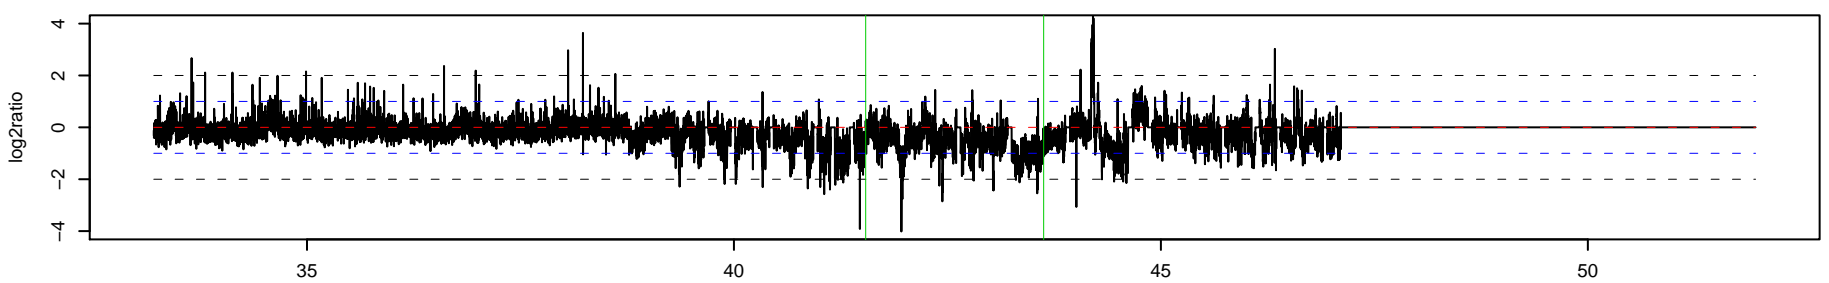

389\_AK1 Chr 9 : 71287720 – 71310590 , 22871 bp (aCGH relative log2ratio= -0.83 )

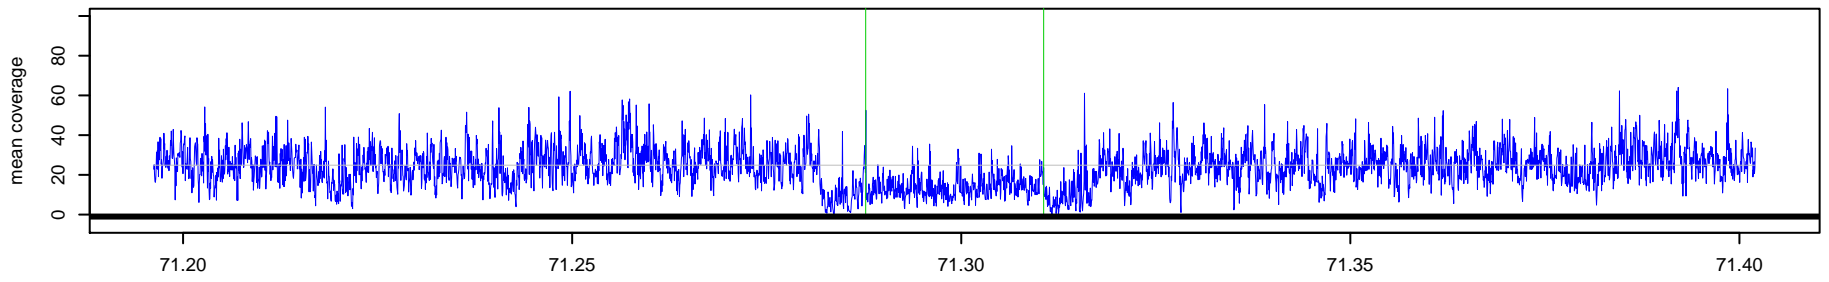

389\_NA10851 Chr 9 : 71287720 – 71310590 , 22871 bp (aCGH relative log2ratio= -0.83 )

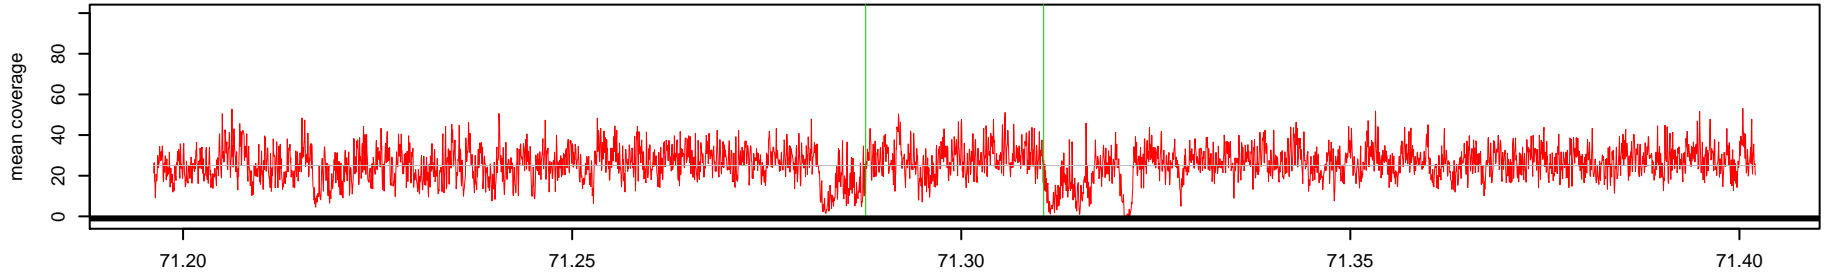

Log2( AK1 read depth / NA10851 read depth)

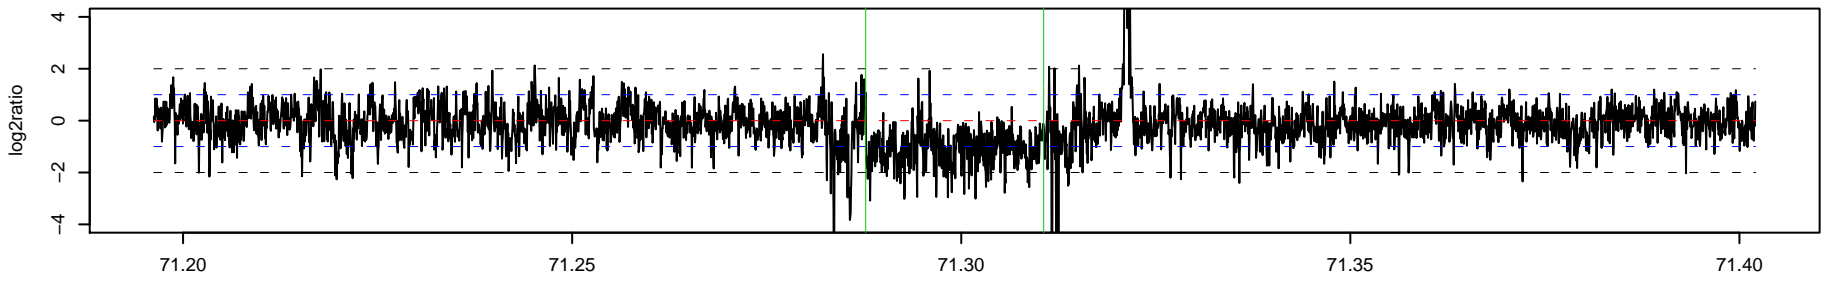

390\_AK1 Chr 9 : 95510151 – 95511392 , 1242 bp (aCGH relative log2ratio= -0.79 )

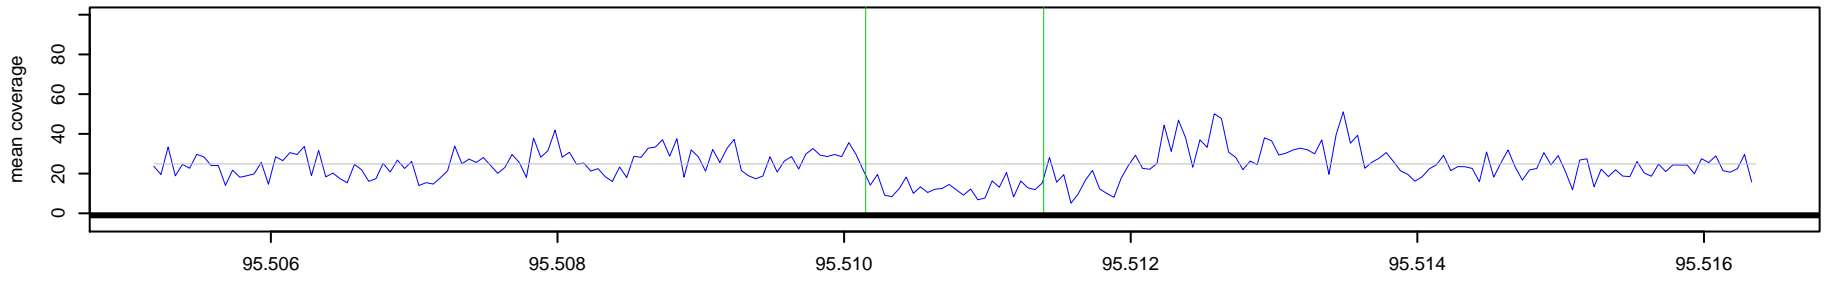

390\_NA10851 Chr 9 : 95510151 – 95511392 , 1242 bp (aCGH relative log2ratio= -0.79 )

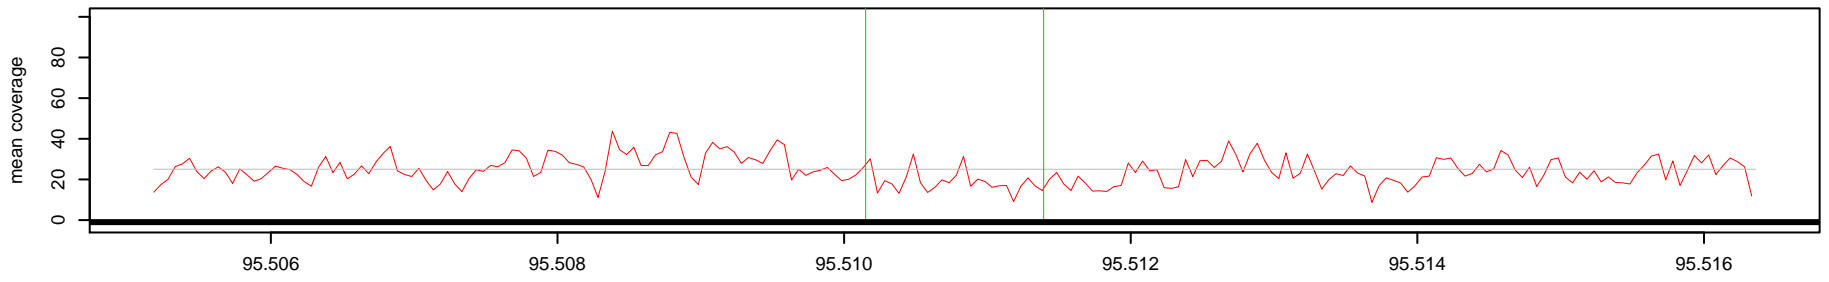

Log2( AK1 read depth / NA10851 read depth)

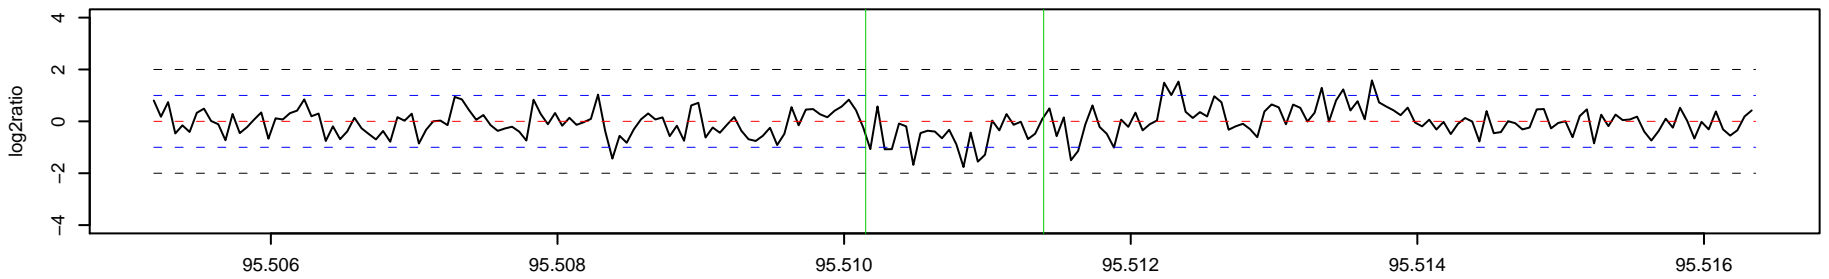

391 \_ AK1 Chr 9 : 105607910 – 105609032 , 1123 bp (aCGH relative log2ratio= 0.74 )

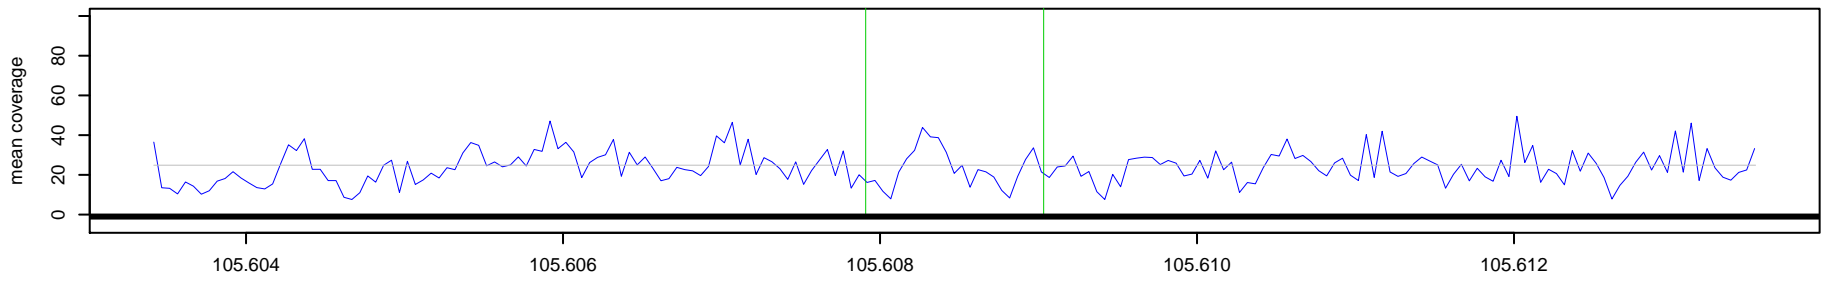

391 \_ NA10851 Chr 9 : 105607910 – 105609032 , 1123 bp (aCGH relative log2ratio= 0.74 )

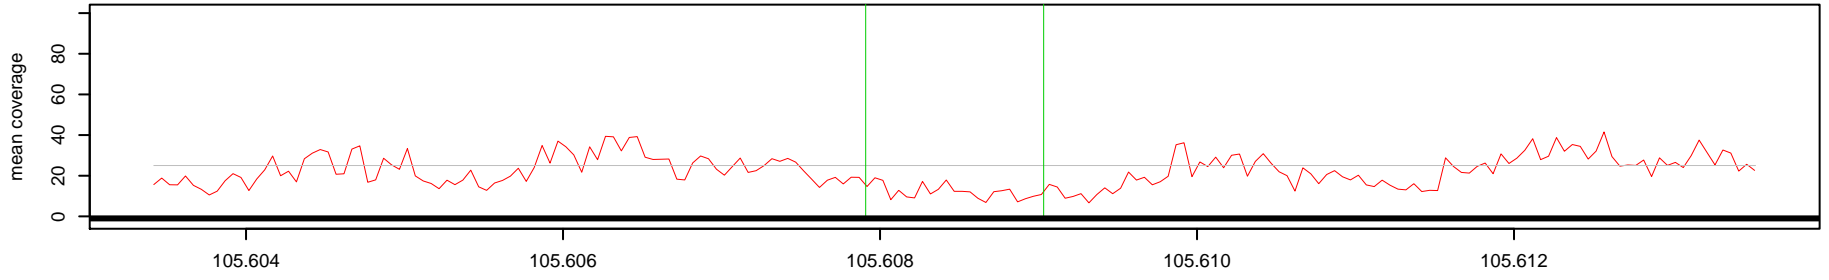

Log2( AK1 read depth / NA10851 read depth)

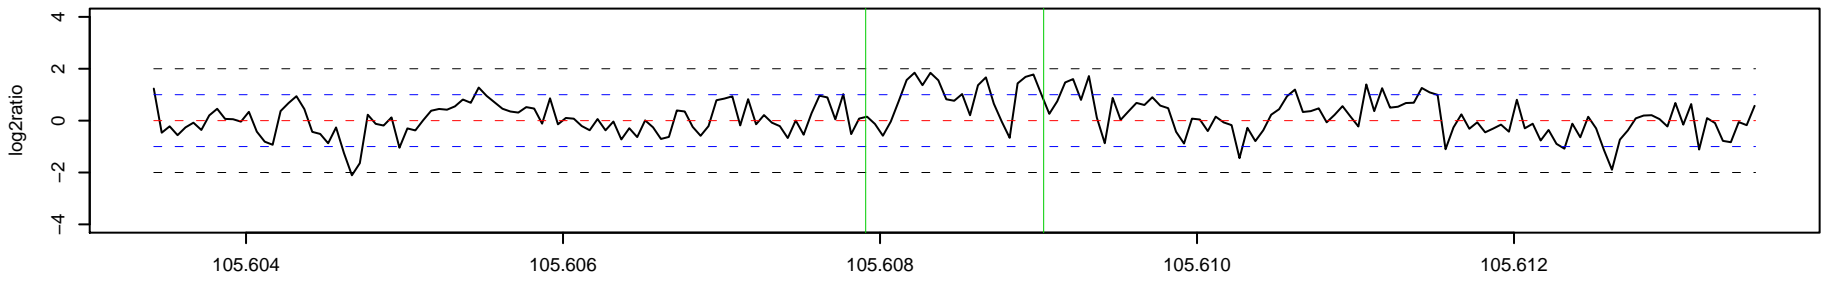

392 \_ AK1 Chr 9 : 123266583 – 123267670 , 1088 bp (aCGH relative log2ratio= -0.86 )

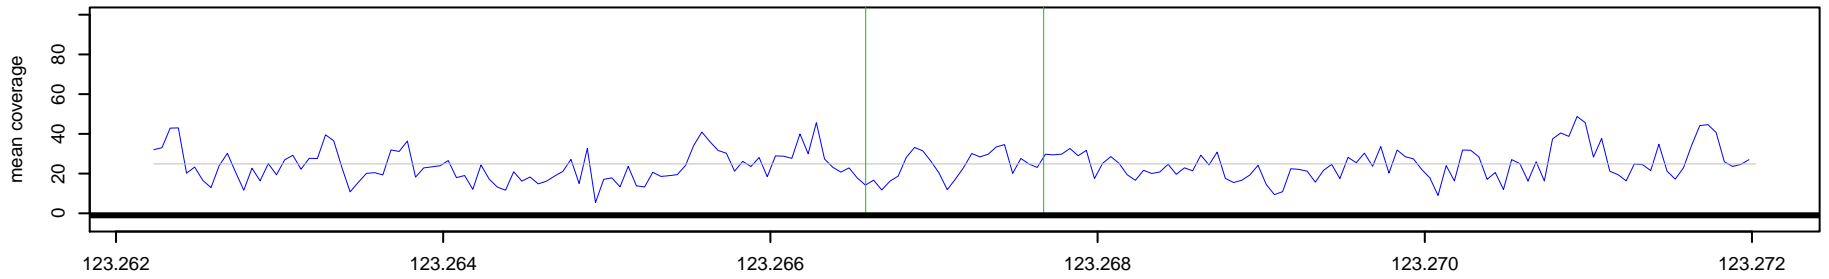

392 \_ NA10851 Chr 9 : 123266583 – 123267670 , 1088 bp (aCGH relative log2ratio= -0.86 )

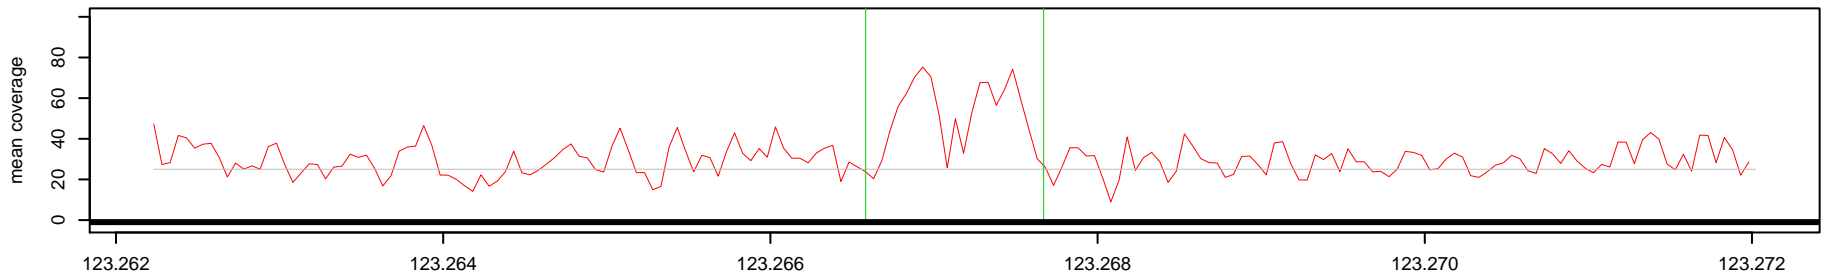

Log2( AK1 read depth / NA10851 read depth)

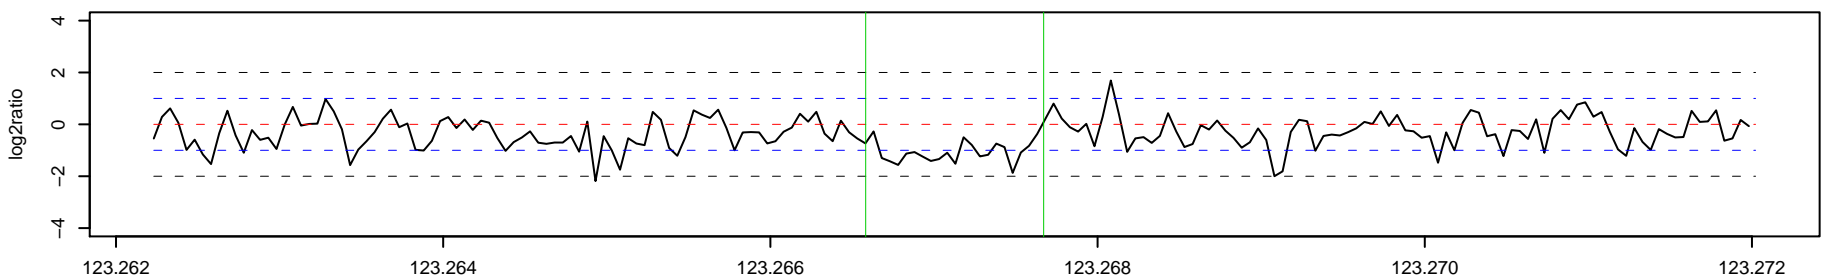



393\_AK1 Chr 9 : 130452410 – 130452988 , 579 bp (aCGH relative log2ratio= -1.74 )

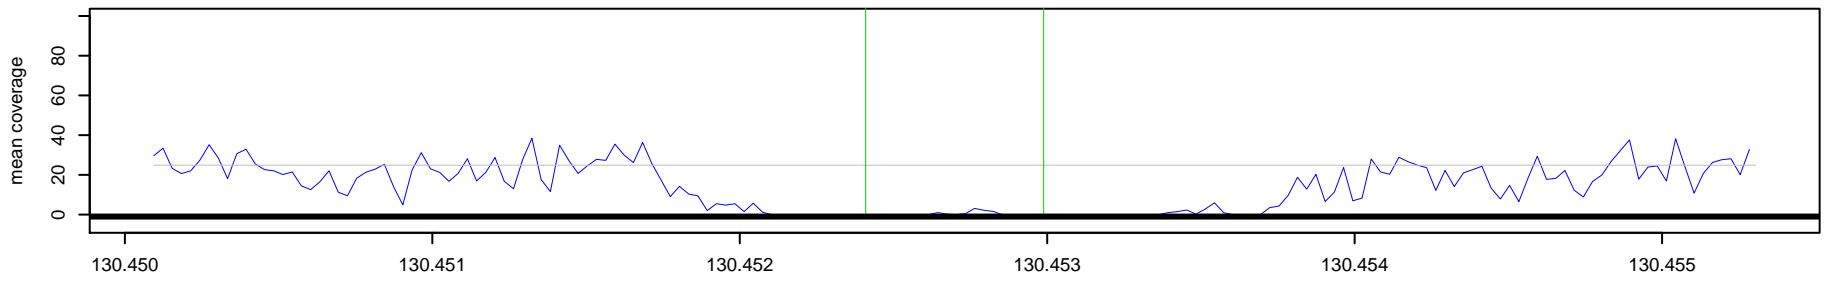

393\_NA10851 Chr 9 : 130452410 – 130452988 , 579 bp (aCGH relative log2ratio= -1.74 )

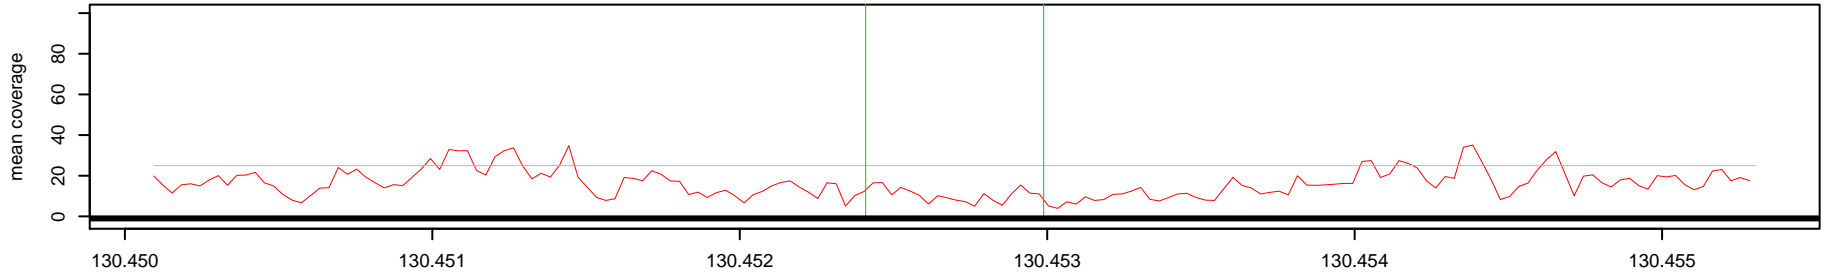

Log2( AK1 read depth / NA10851 read depth)

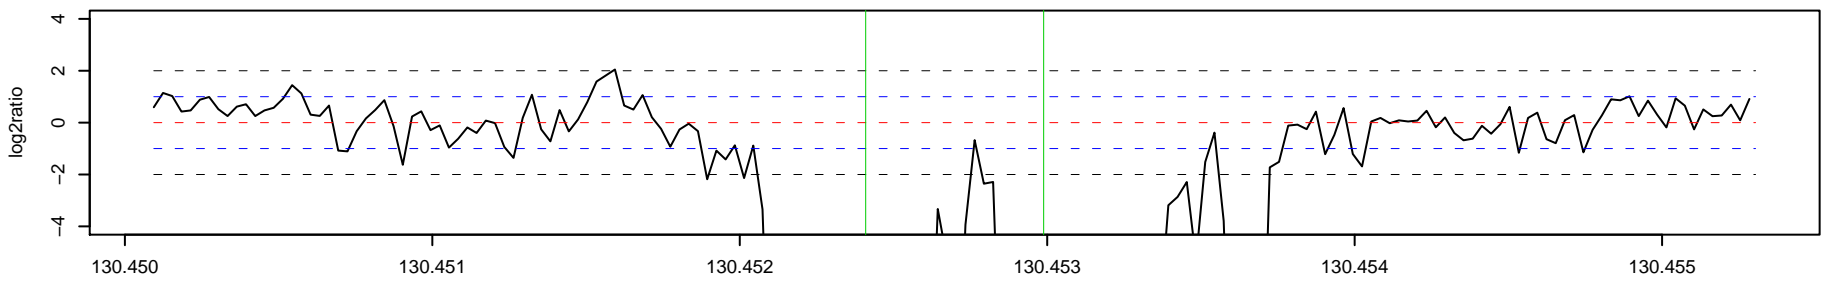

394\_AK1 Chr 9 : 131226839 – 131246164 , 19326 bp (aCGH relative log2ratio= -0.49 )

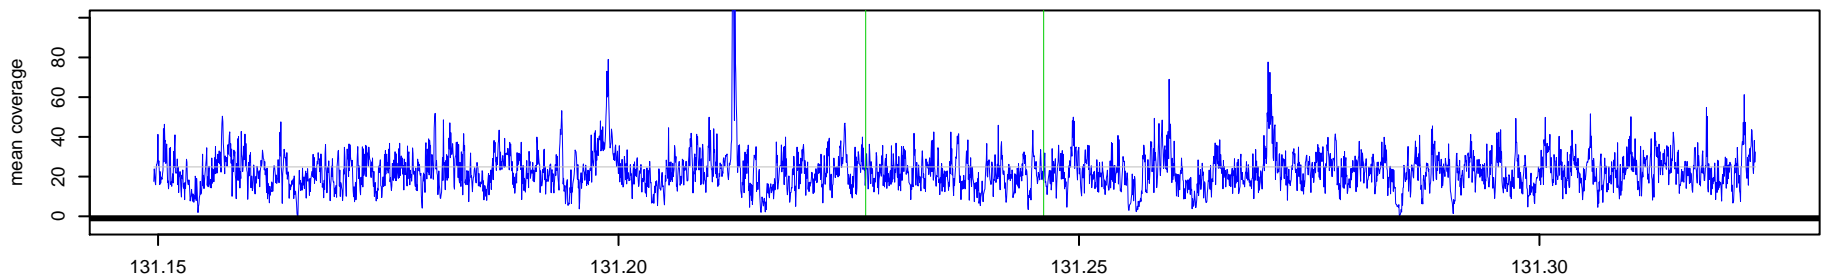

394\_NA10851 Chr 9 : 131226839 – 131246164 , 19326 bp (aCGH relative log2ratio= -0.49 )

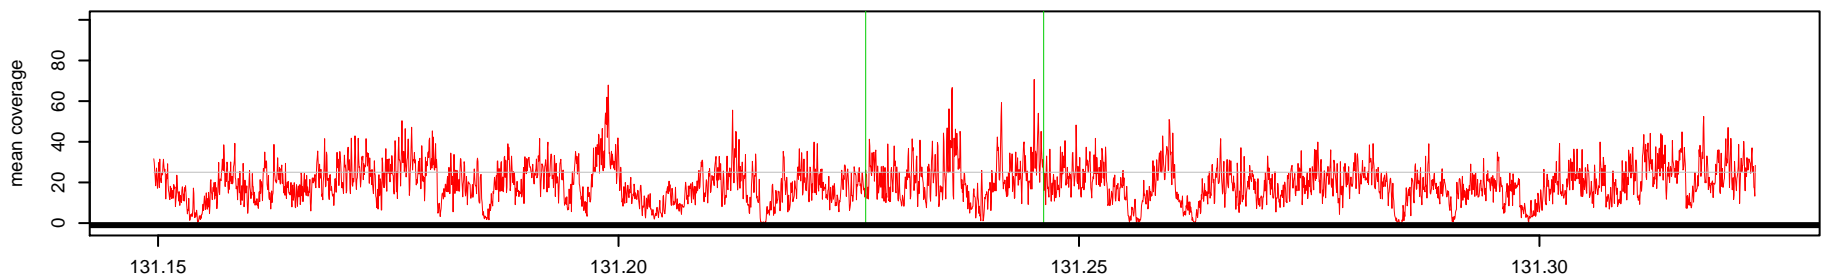

Log2( AK1 read depth / NA10851 read depth)

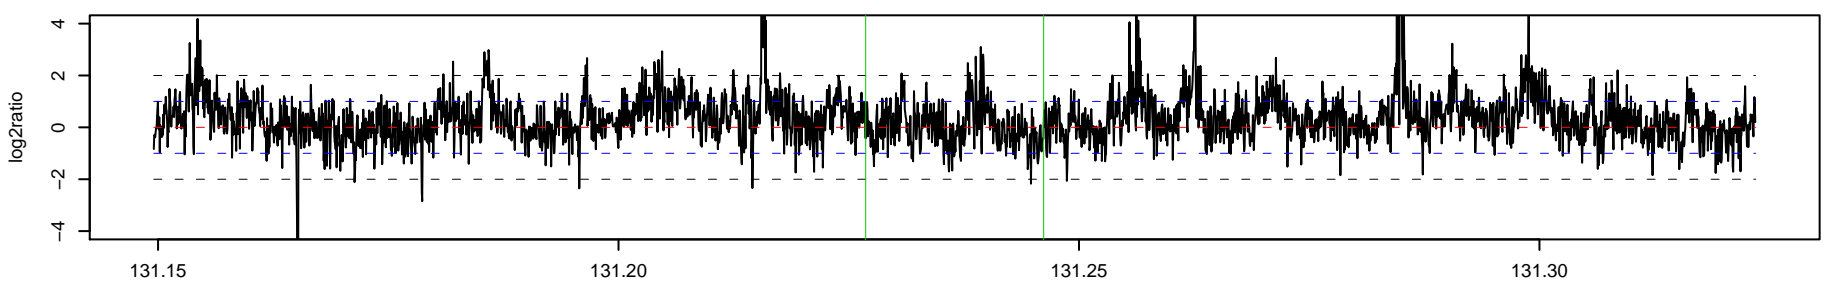

395 \_ AK1 Chr 9 : 133251224 – 133255762 , 4539 bp (aCGH relative log2ratio= -0.80 )

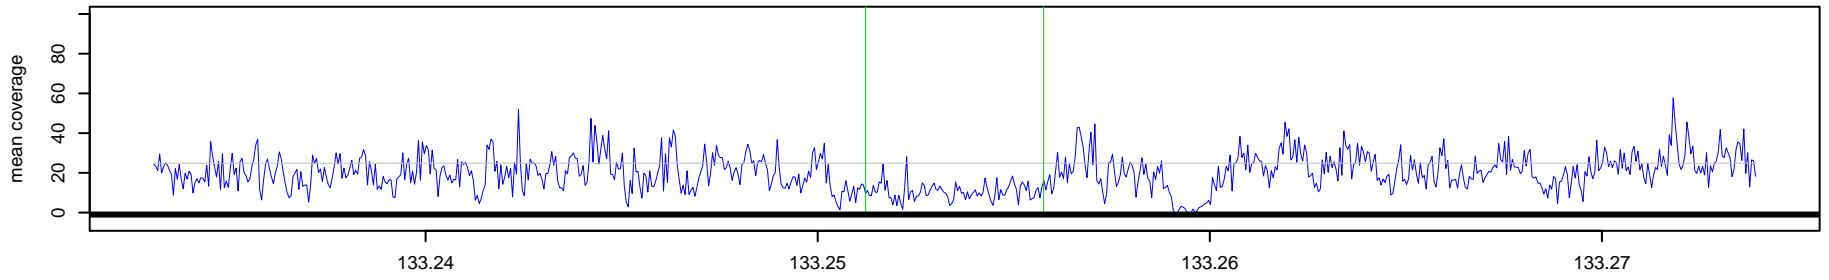

395 \_ NA10851 Chr 9 : 133251224 – 133255762 , 4539 bp (aCGH relative log2ratio= -0.80 )

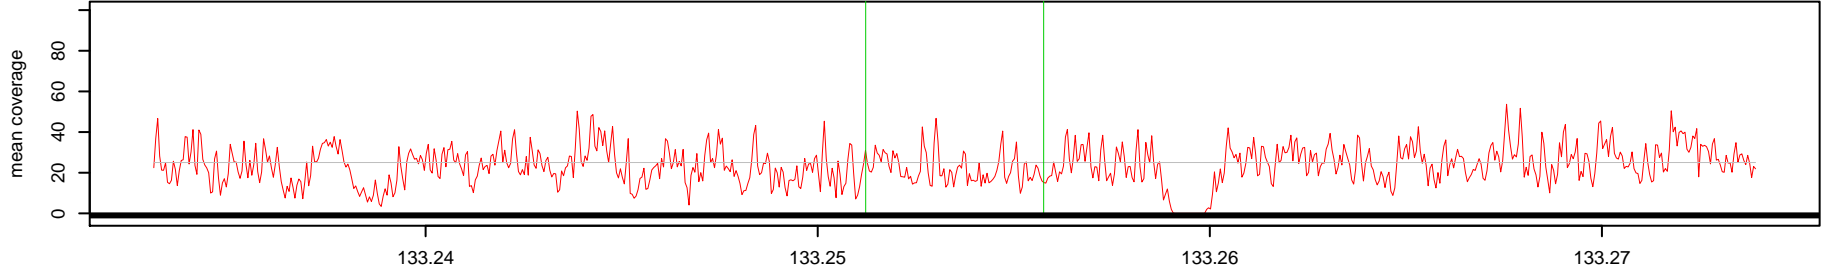

Log2( AK1 read depth / NA10851 read depth)

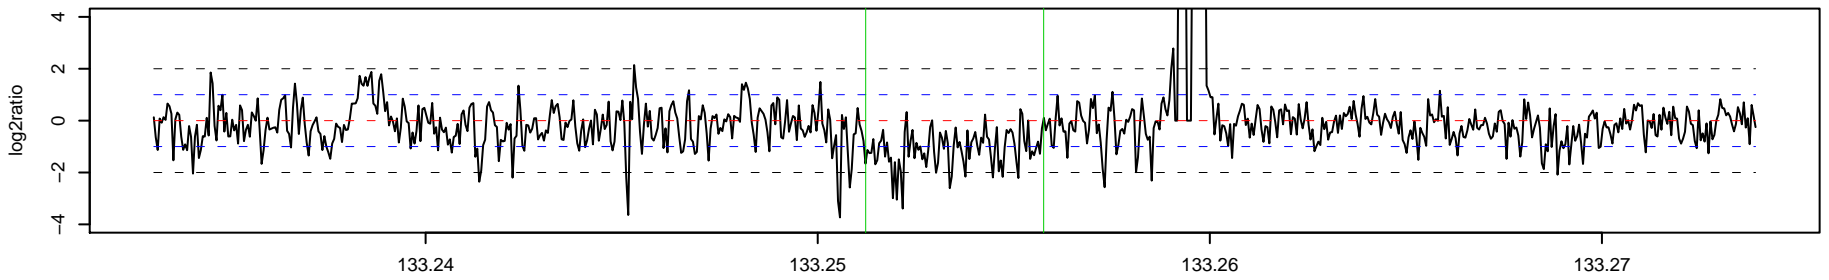

396 \_ AK1 Chr 9 : 134929917 – 134947303 , 17387 bp (aCGH relative log2ratio= 0.26 )

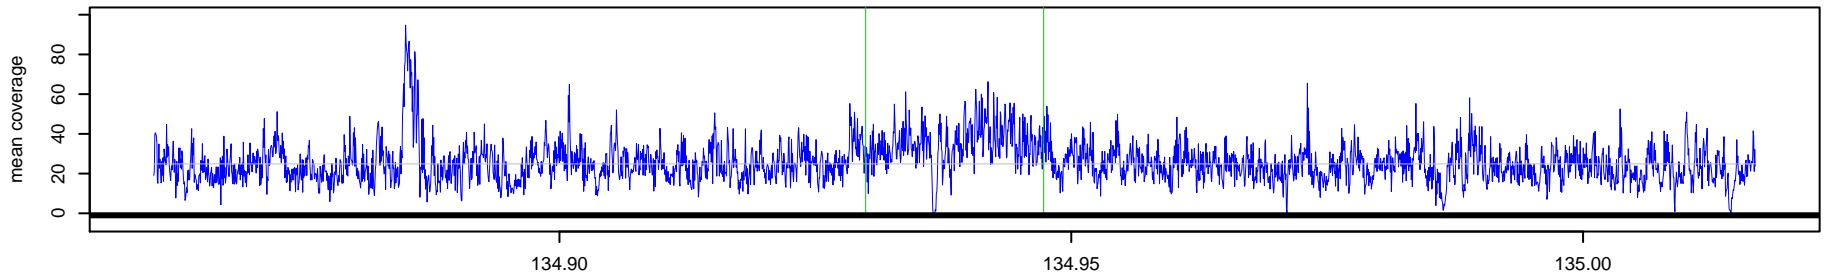

396 \_ NA10851 Chr 9 : 134929917 – 134947303 , 17387 bp (aCGH relative log2ratio= 0.26 )

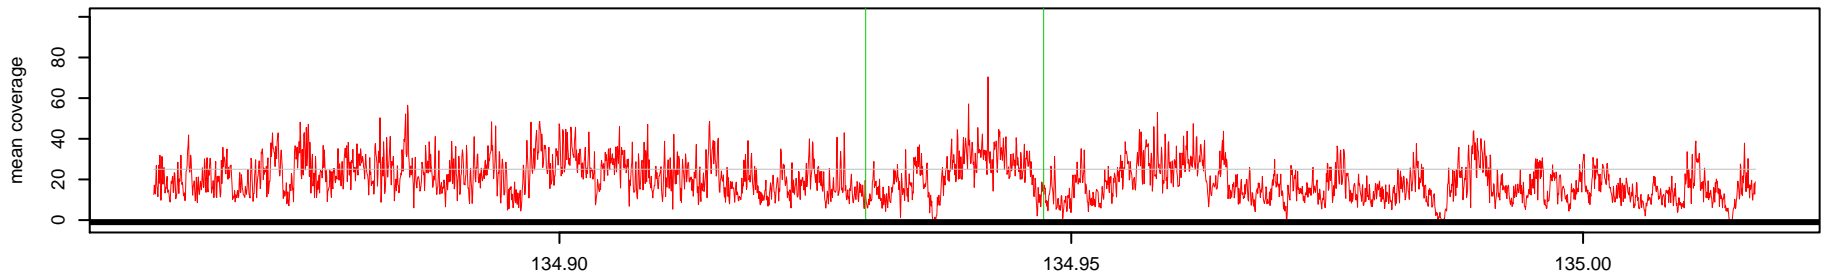

Log2( AK1 read depth / NA10851 read depth)

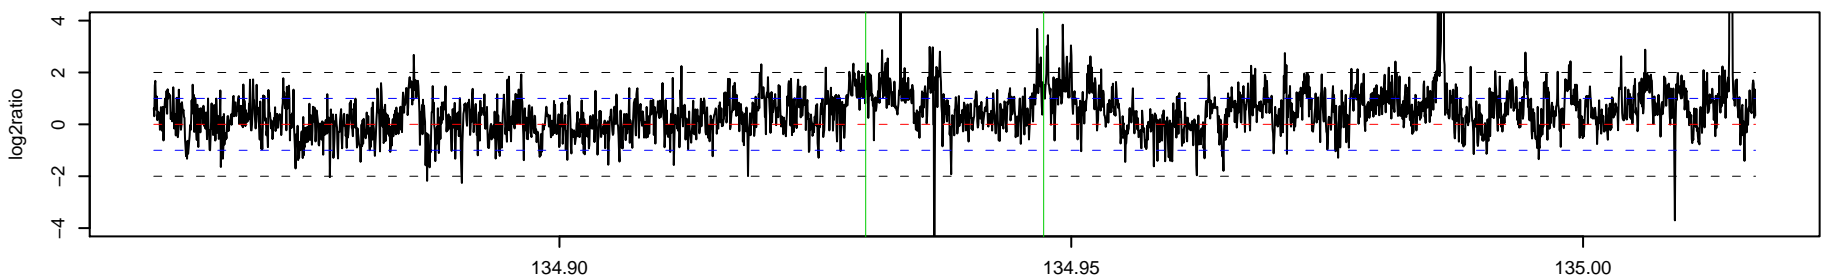

397 \_ AK1 Chr 9 : 134938149 – 134939076 , 928 bp (aCGH relative log2ratio= 0.70 )

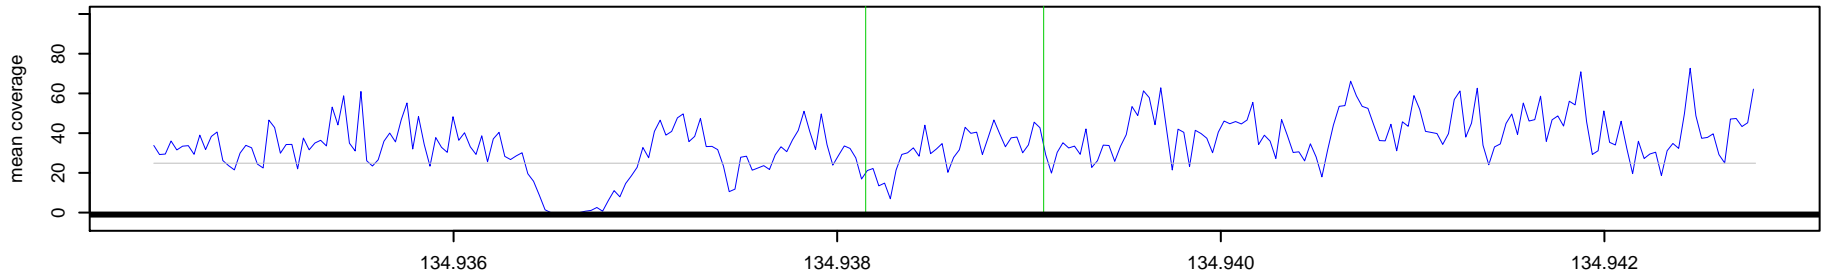

397 \_ NA10851 Chr 9 : 134938149 – 134939076 , 928 bp (aCGH relative log2ratio= 0.70 )

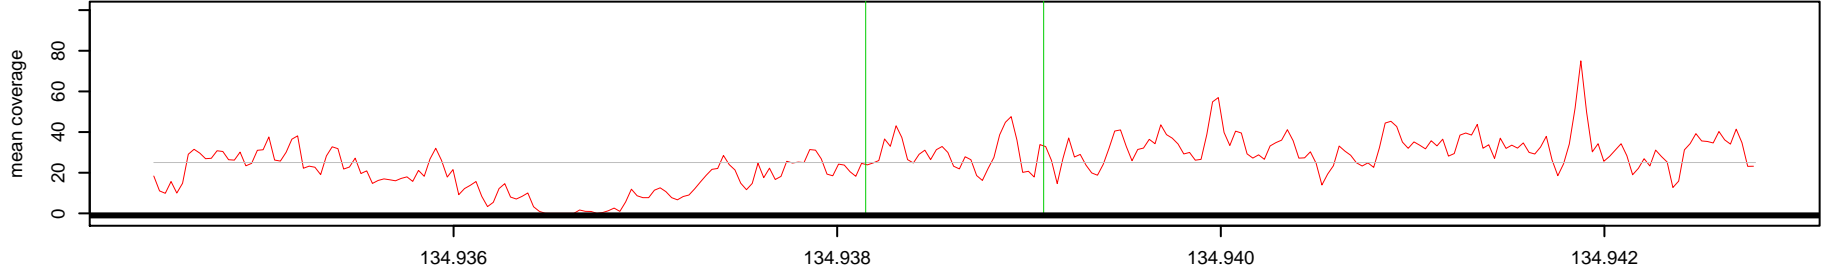

Log2( AK1 read depth / NA10851 read depth)

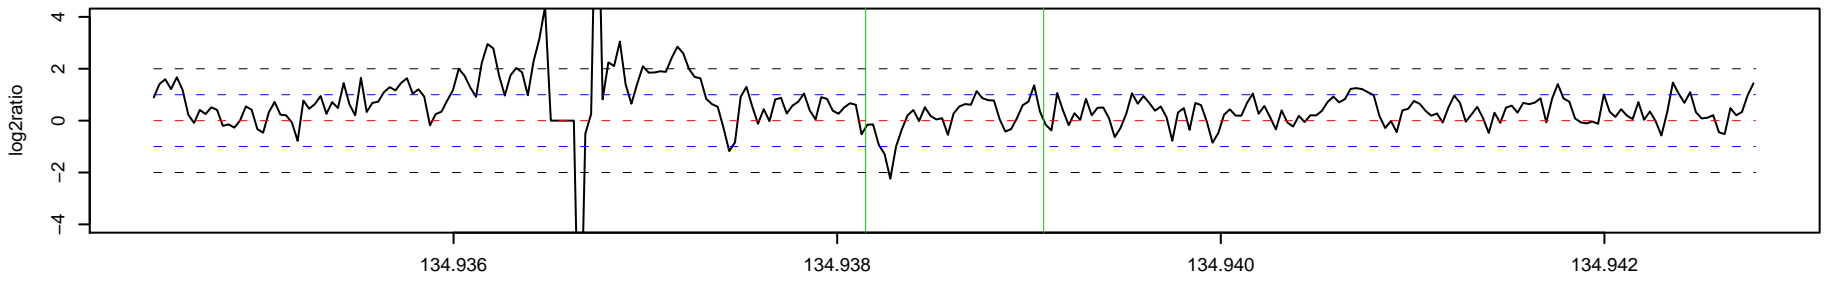

398 \_ AK1 Chr 9 : 137333931 – 137335183 , 1253 bp (aCGH relative log2ratio= -0.70 )

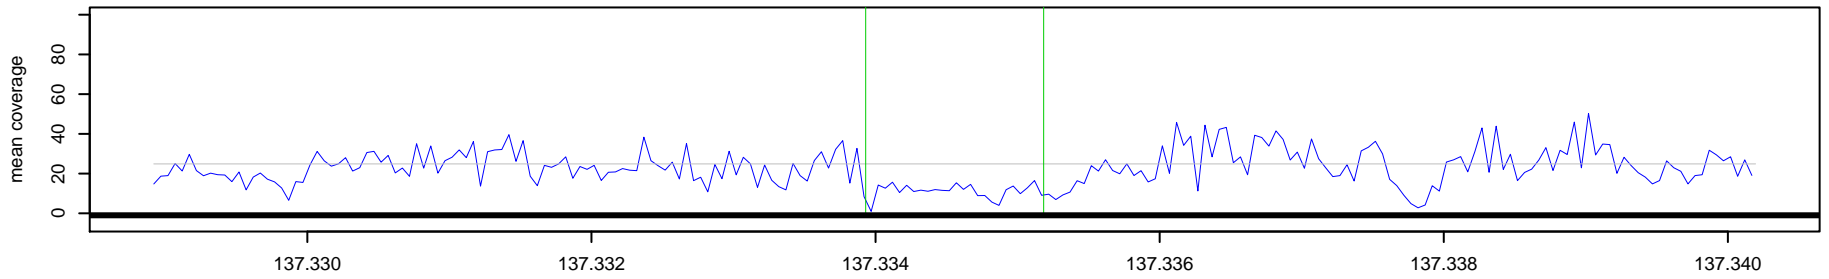

398 \_ NA10851 Chr 9 : 137333931 – 137335183 , 1253 bp (aCGH relative log2ratio= -0.70 )

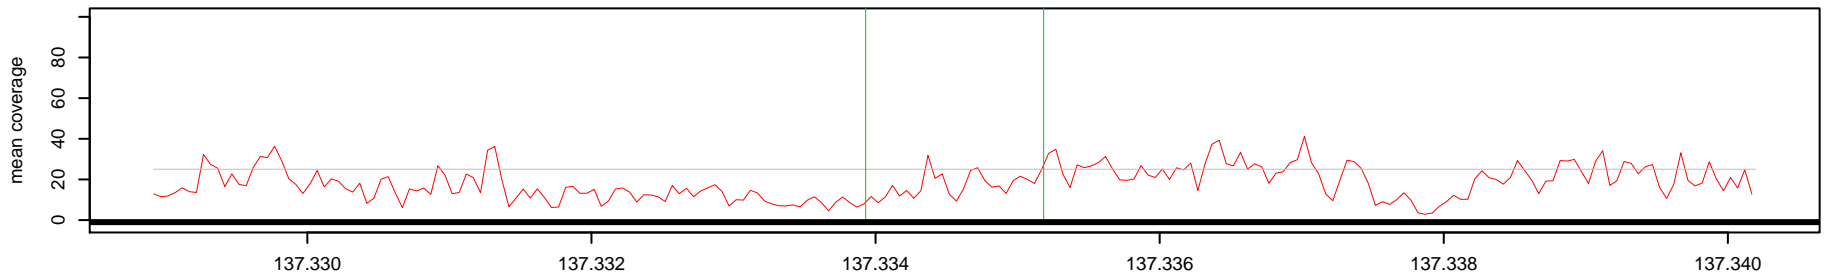

Log2( AK1 read depth / NA10851 read depth)

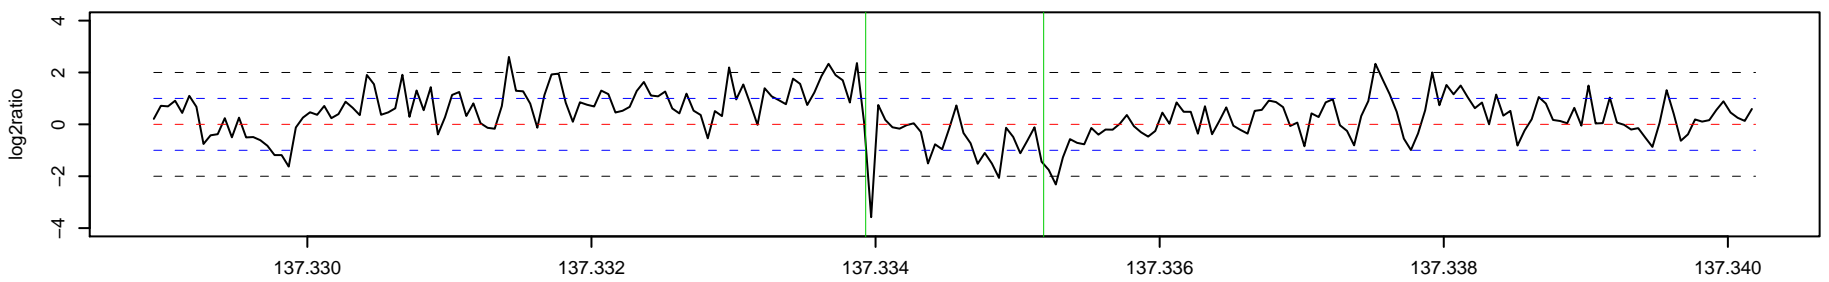

399 \_ AK1 Chr 9 : 137353872 – 137357550 , 3679 bp (aCGH relative log2ratio= 1.31 )

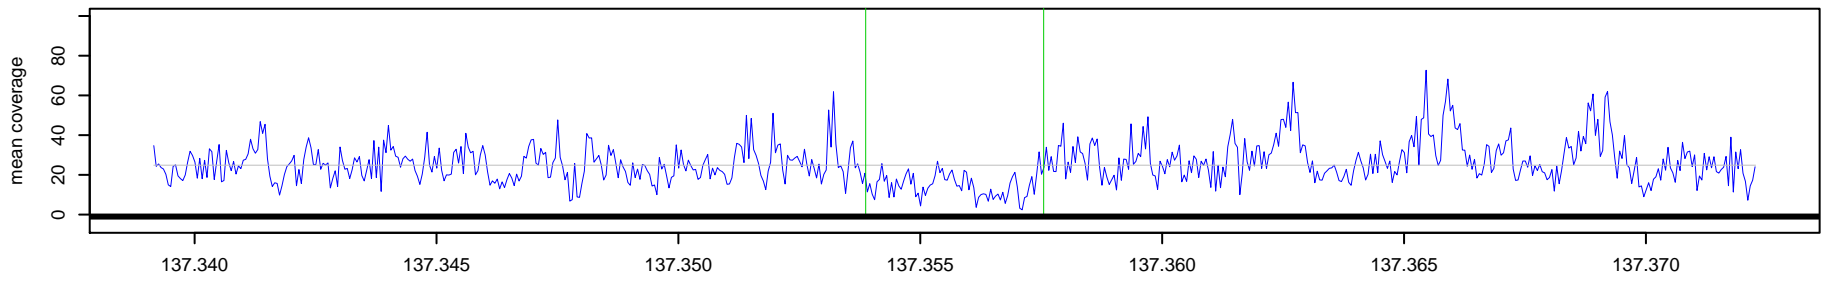

399 \_ NA10851 Chr 9 : 137353872 – 137357550 , 3679 bp (aCGH relative log2ratio= 1.31 )

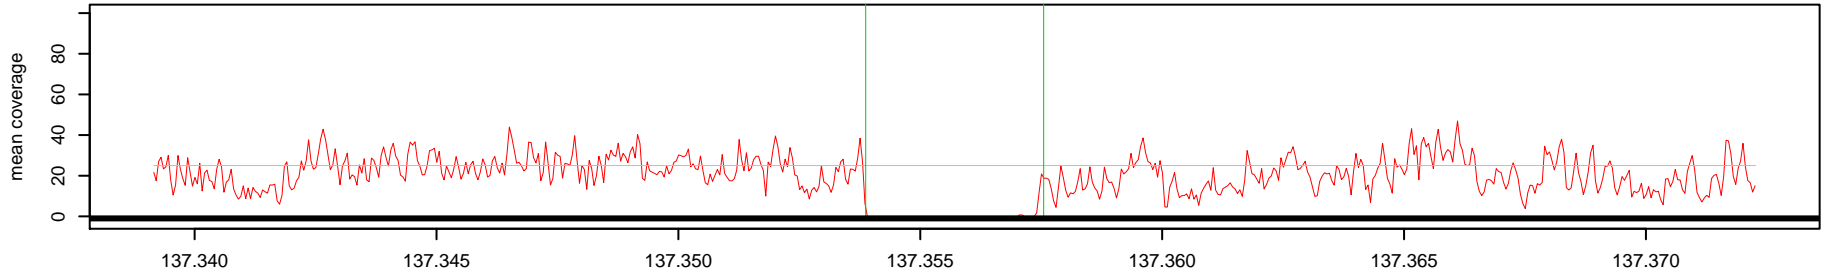

Log2( AK1 read depth / NA10851 read depth)

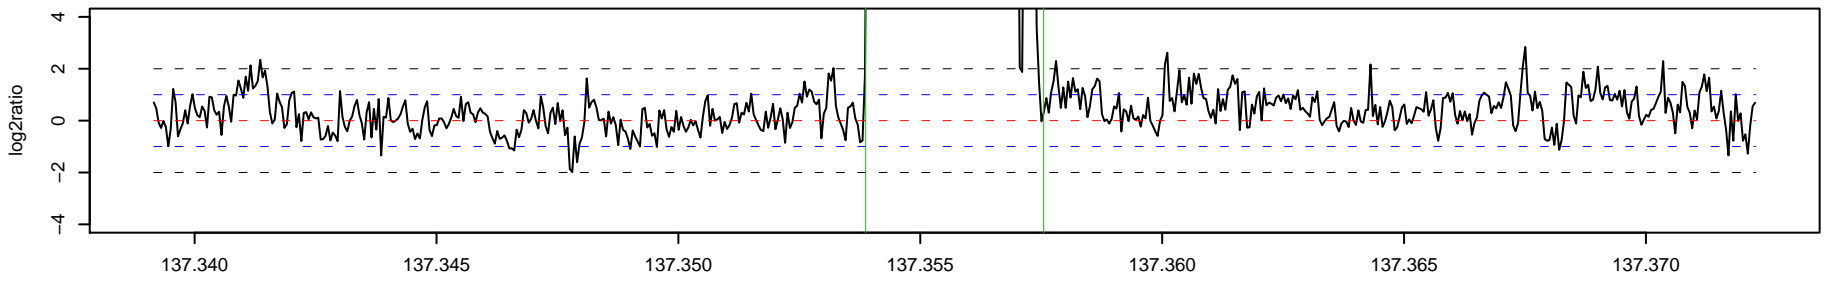

400 \_ AK1 Chr 9 : 139903124 – 139905089 , 1966 bp (aCGH relative log2ratio= 0.32 )

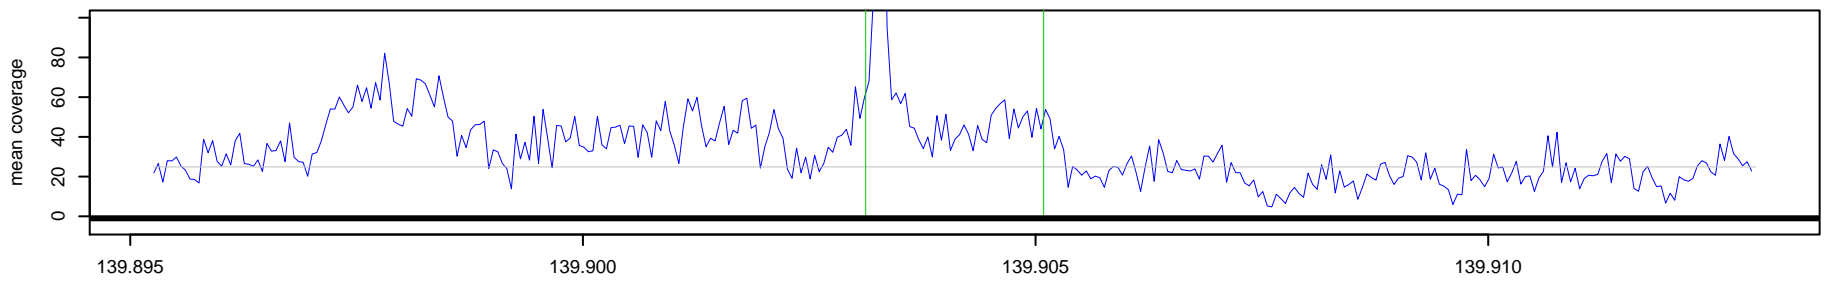

400 \_ NA10851 Chr 9 : 139903124 – 139905089 , 1966 bp (aCGH relative log2ratio= 0.32 )

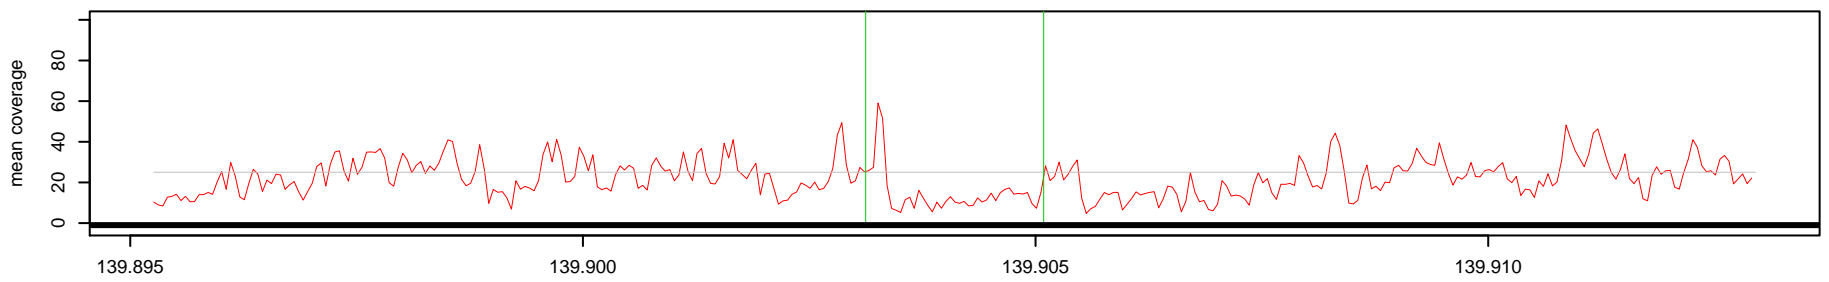

Log2( AK1 read depth / NA10851 read depth)

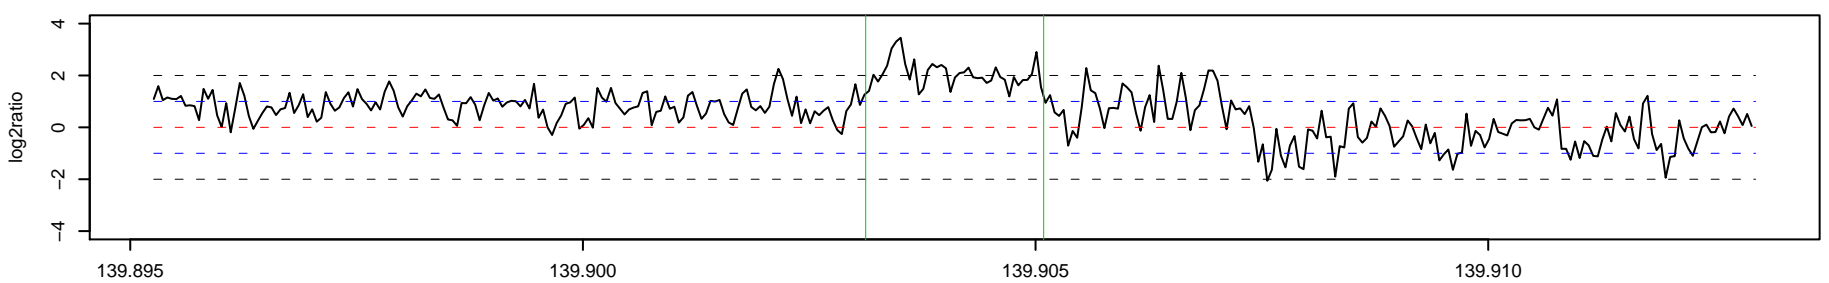

401\_AK1 Chr 10 : 2138221 - 2143103 , 4883 bp (aCGH relative log2ratio= -0.90 )

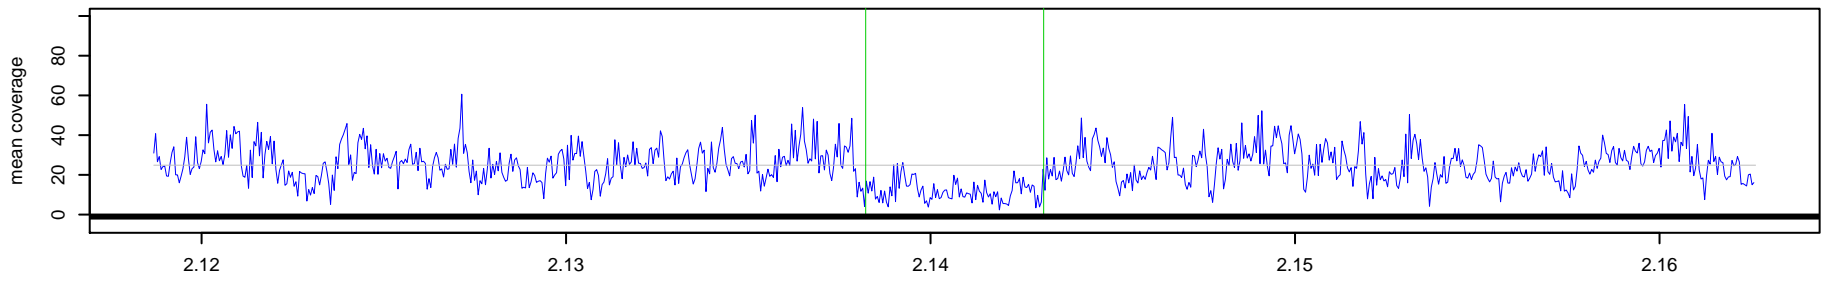

401\_NA10851 Chr 10 : 2138221 - 2143103 , 4883 bp (aCGH relative log2ratio= -0.90 )

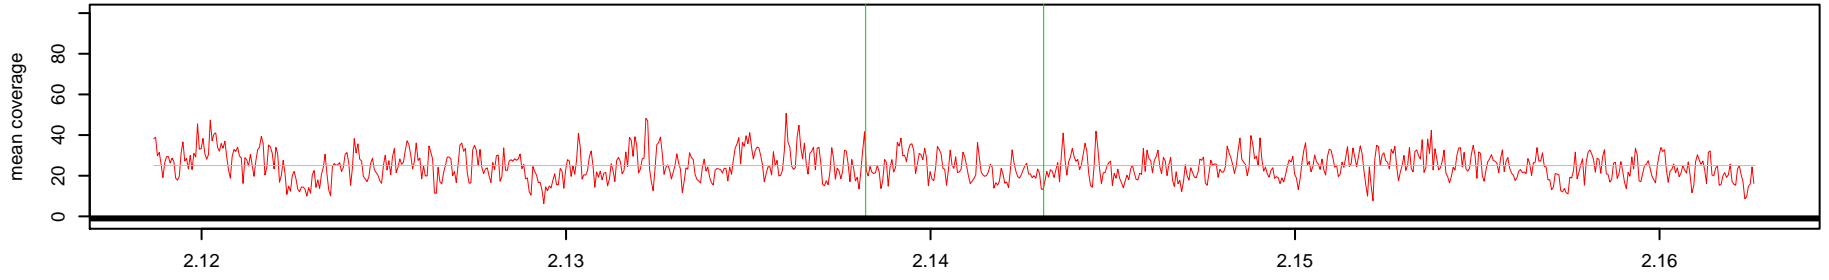

Log2( AK1 read depth / NA10851 read depth)

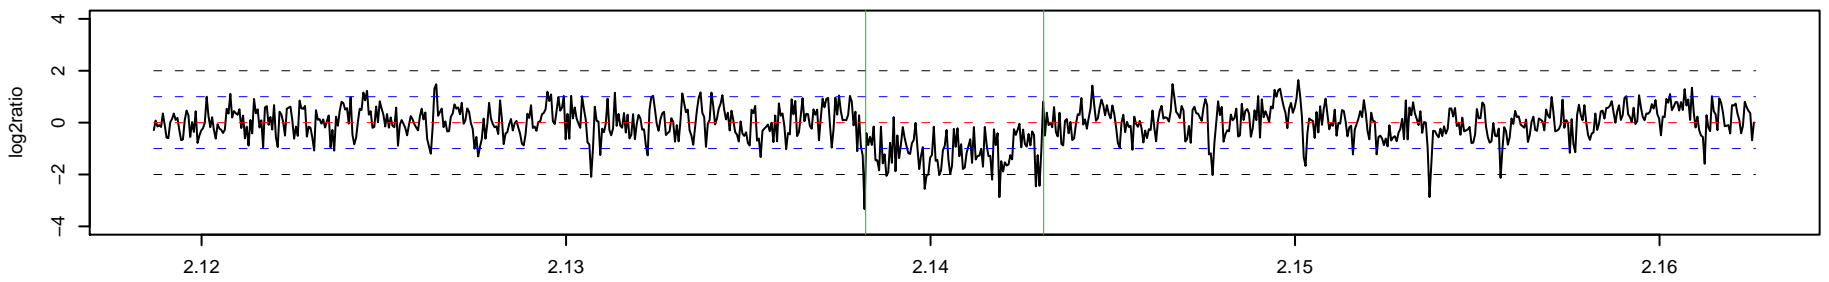

402\_AK1 Chr 10 : 6695143 - 6704177 , 9035 bp (aCGH relative log2ratio= 0.67 )

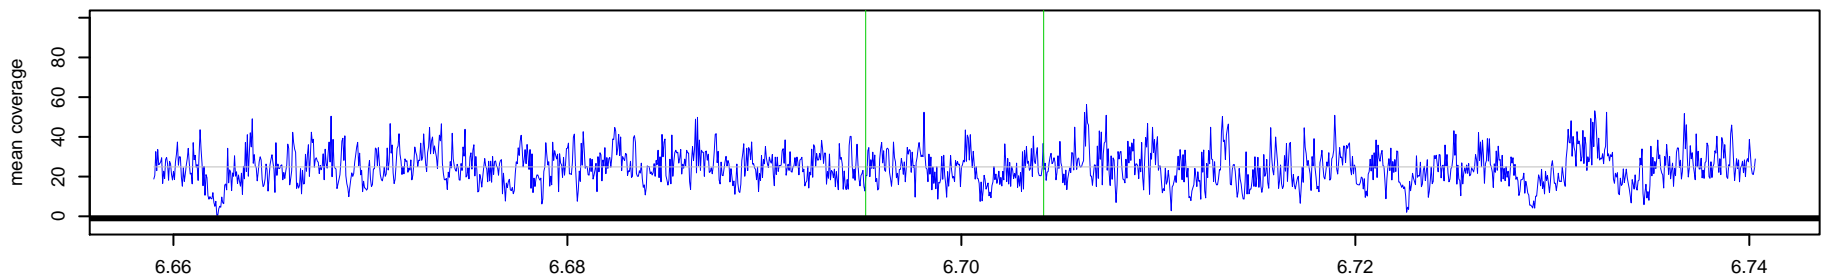

402\_NA10851 Chr 10 : 6695143 - 6704177 , 9035 bp (aCGH relative log2ratio= 0.67 )

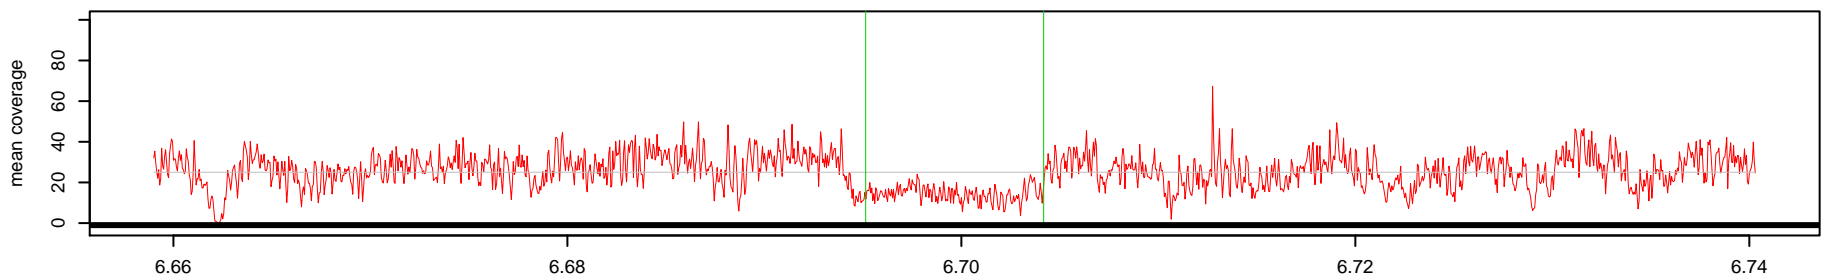

Log2( AK1 read depth / NA10851 read depth)

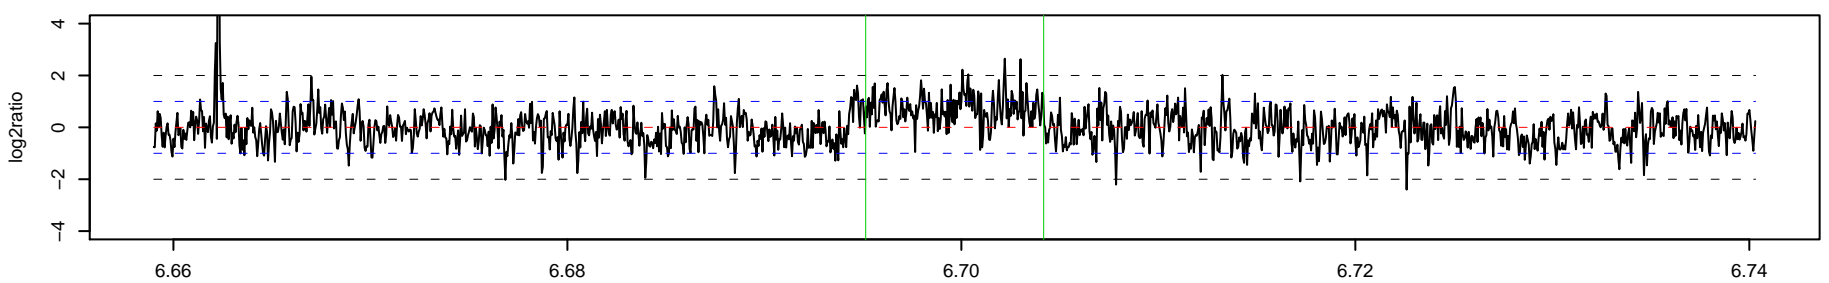

403\_AK1 Chr 10 : 7117223 - 7118192 , 970 bp (aCGH relative log2ratio= 1.10 )

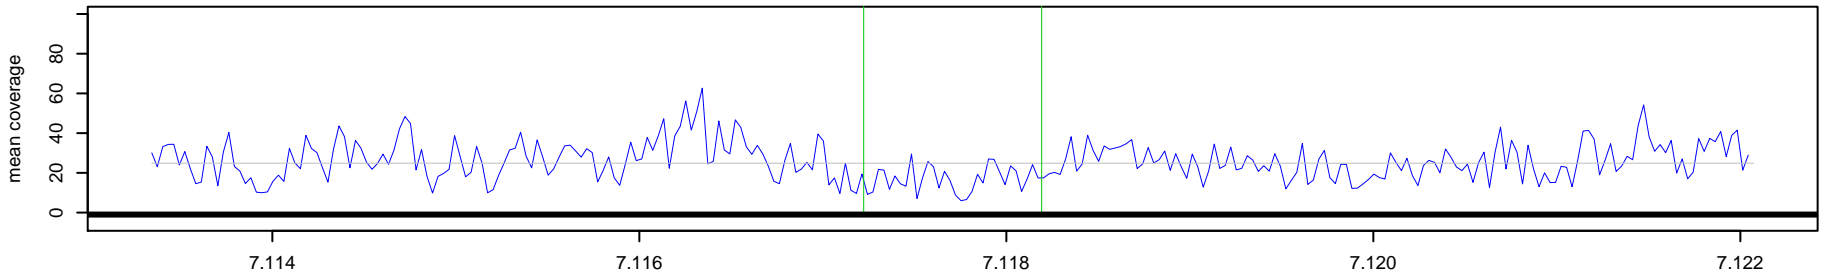

403\_NA10851 Chr 10 : 7117223 - 7118192 , 970 bp (aCGH relative log2ratio= 1.10 )

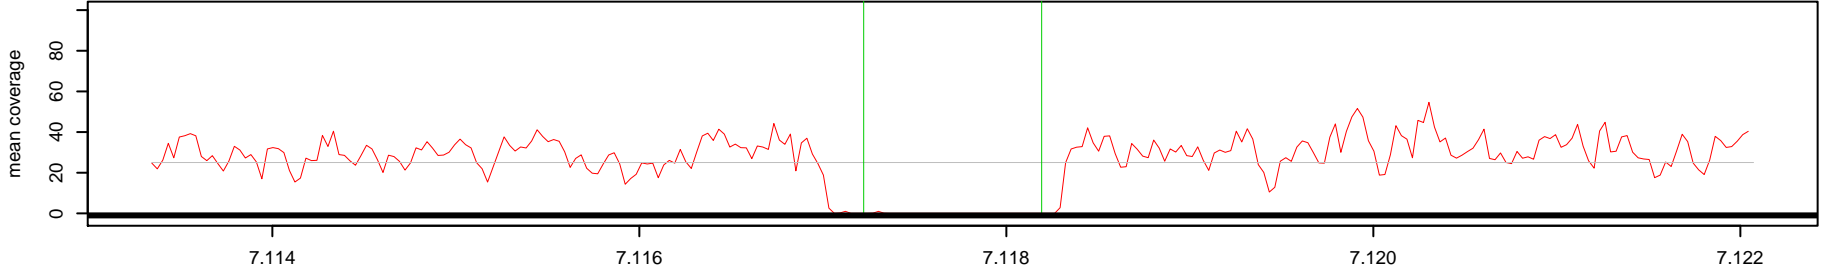

Log2( AK1 read depth / NA10851 read depth)

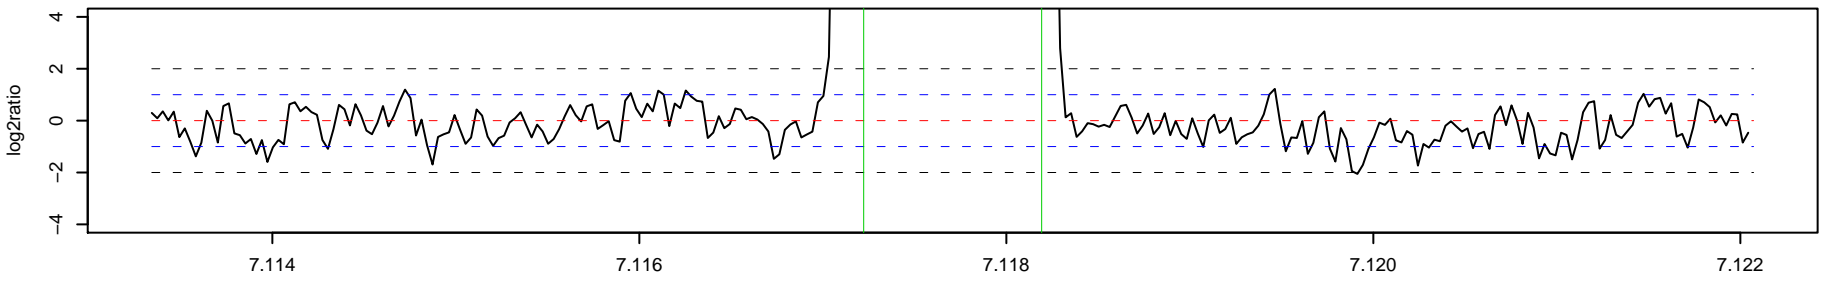

404\_AK1 Chr 10 : 8674498 - 8675080 , 583 bp (aCGH relative log2ratio= 0.51 )

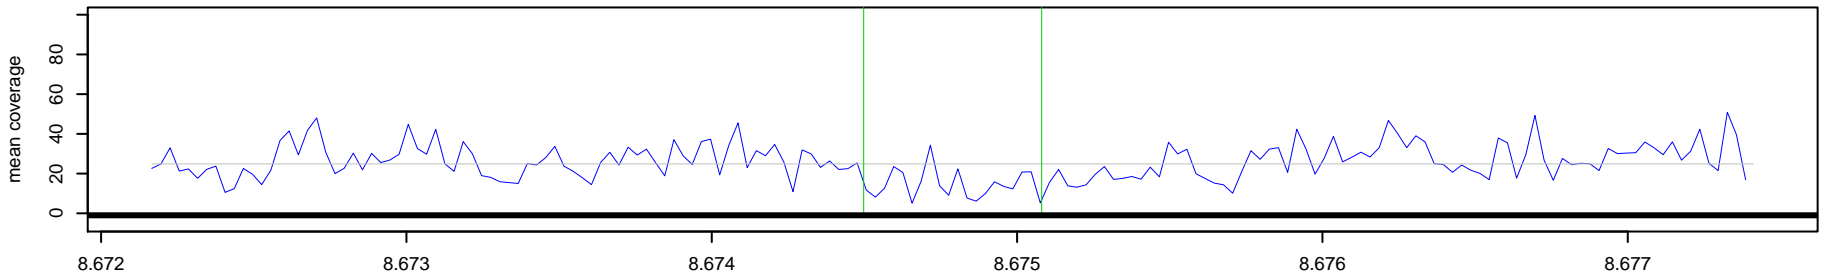

404\_NA10851 Chr 10 : 8674498 - 8675080 , 583 bp (aCGH relative log2ratio= 0.51 )

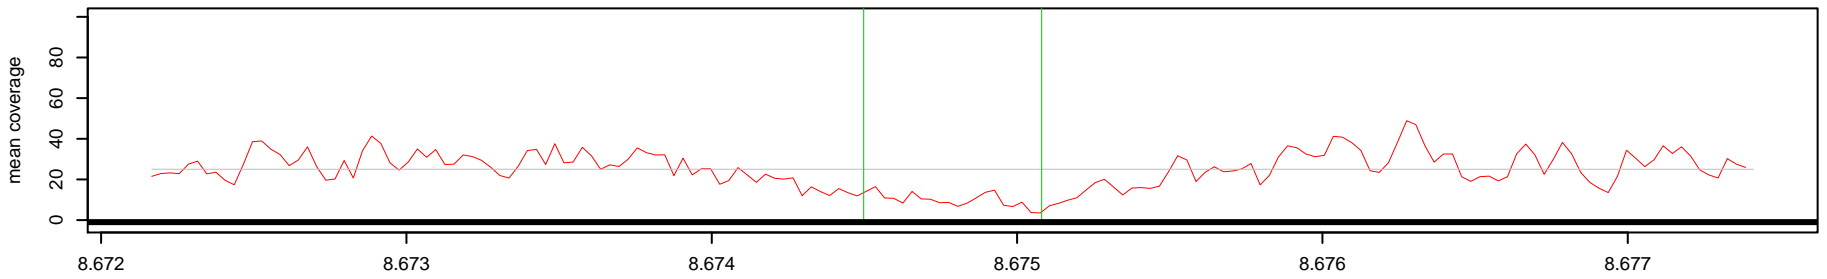

Log2( AK1 read depth / NA10851 read depth)

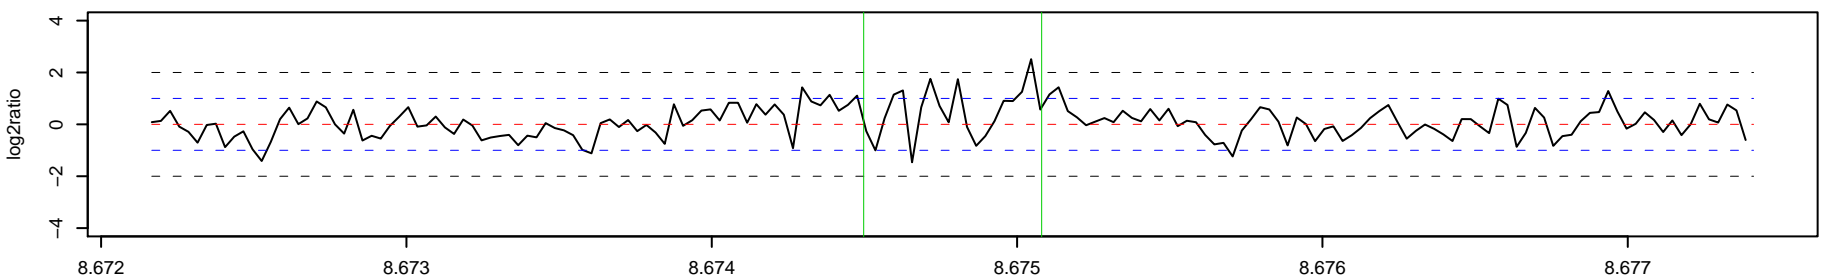

405\_AK1 Chr 10 : 20036966 - 20038170 , 1205 bp (aCGH relative log2ratio= -0.70 )

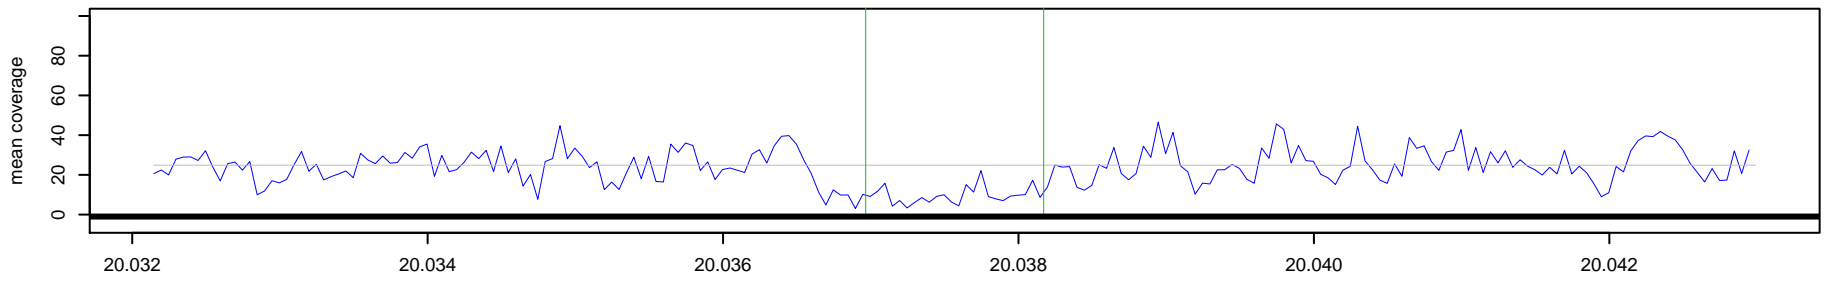

405\_NA10851 Chr 10 : 20036966 - 20038170 , 1205 bp (aCGH relative log2ratio= -0.70 )

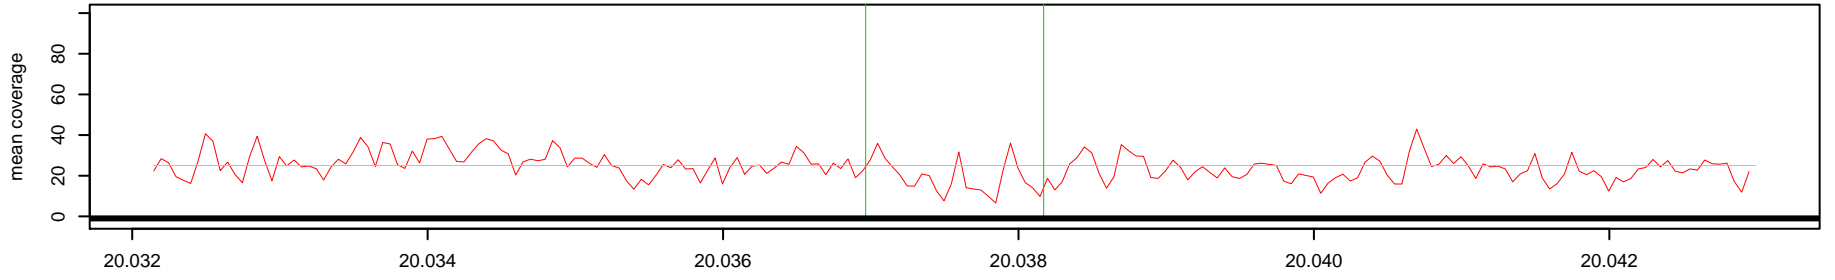

Log2( AK1 read depth / NA10851 read depth)

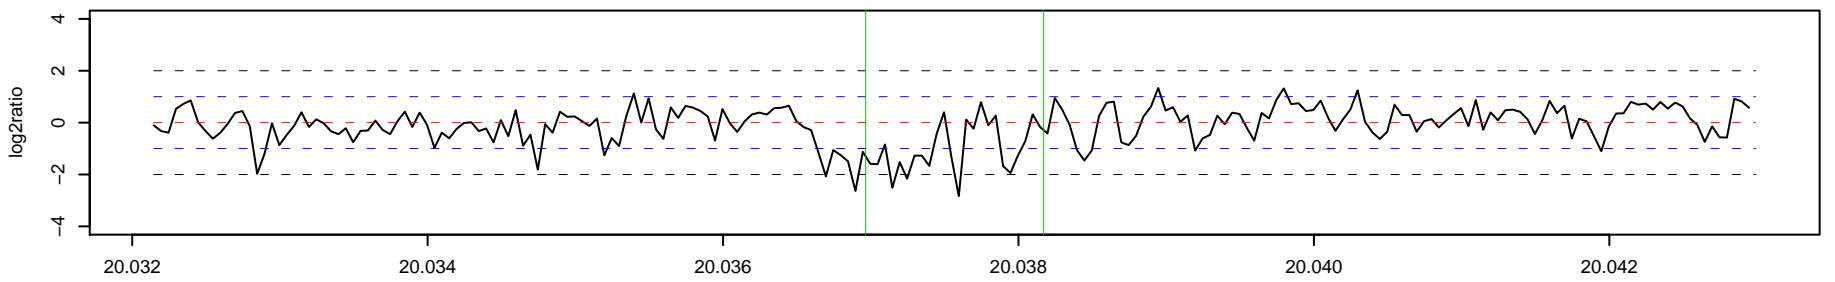

406\_AK1 Chr 10 : 27038928 - 27042012 , 3085 bp (aCGH relative log2ratio= 0.78 )

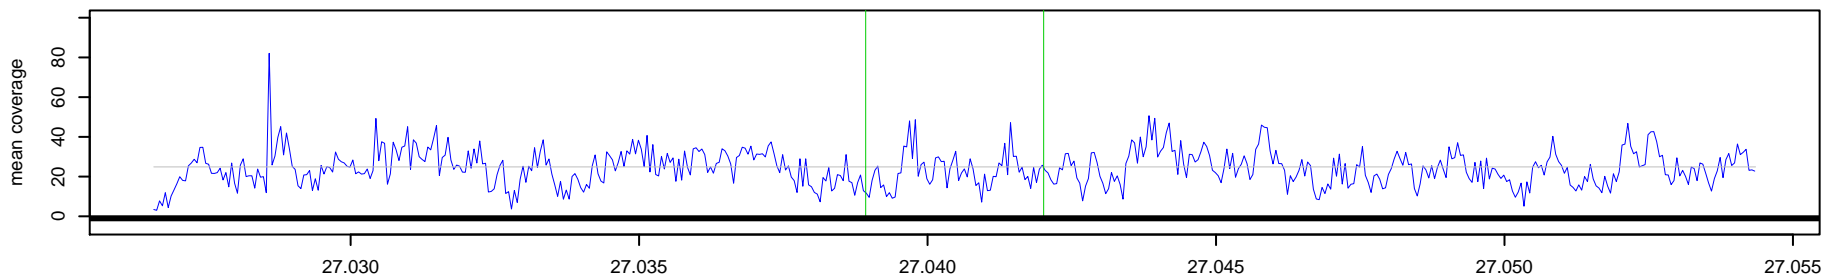

406\_NA10851 Chr 10 : 27038928 - 27042012 , 3085 bp (aCGH relative log2ratio= 0.78 )

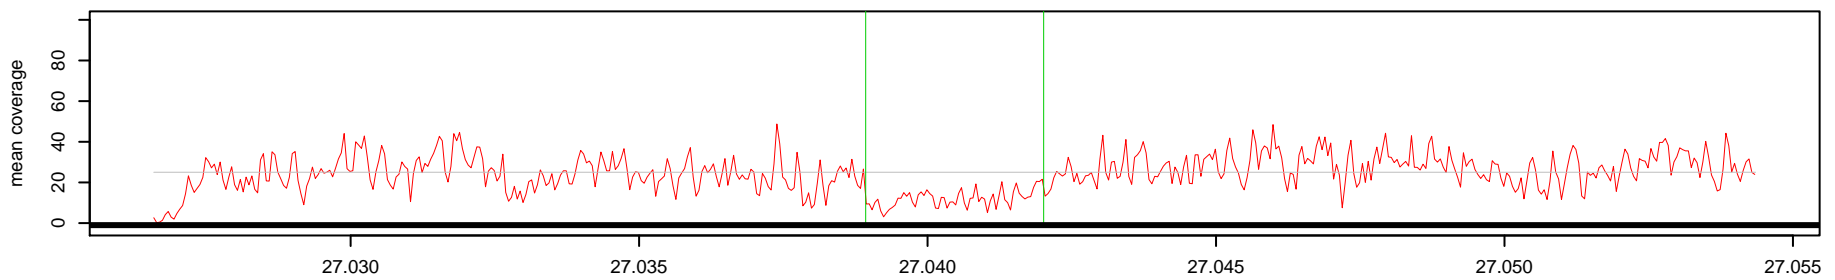

Log2( AK1 read depth / NA10851 read depth)

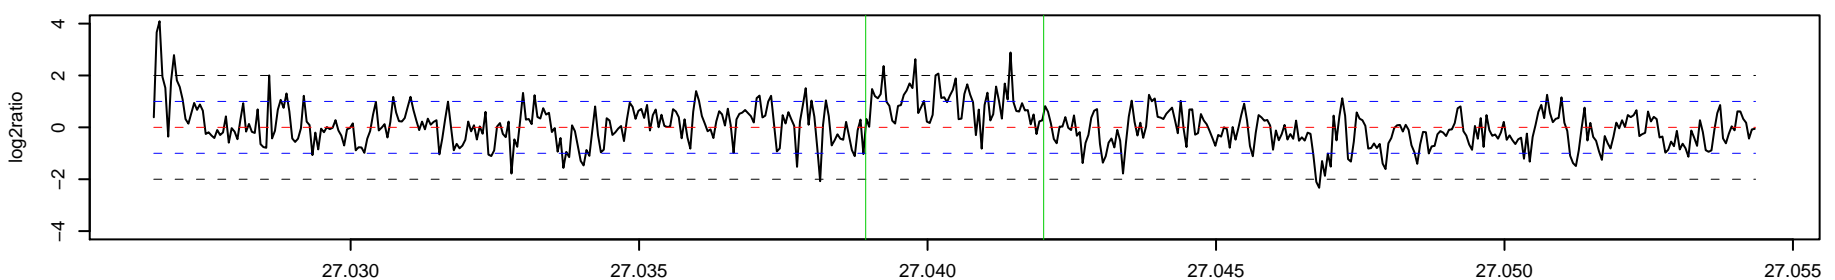

407\_AK1 Chr 10 : 29782499 – 29782963 , 465 bp (aCGH relative log2ratio= 1.06 )

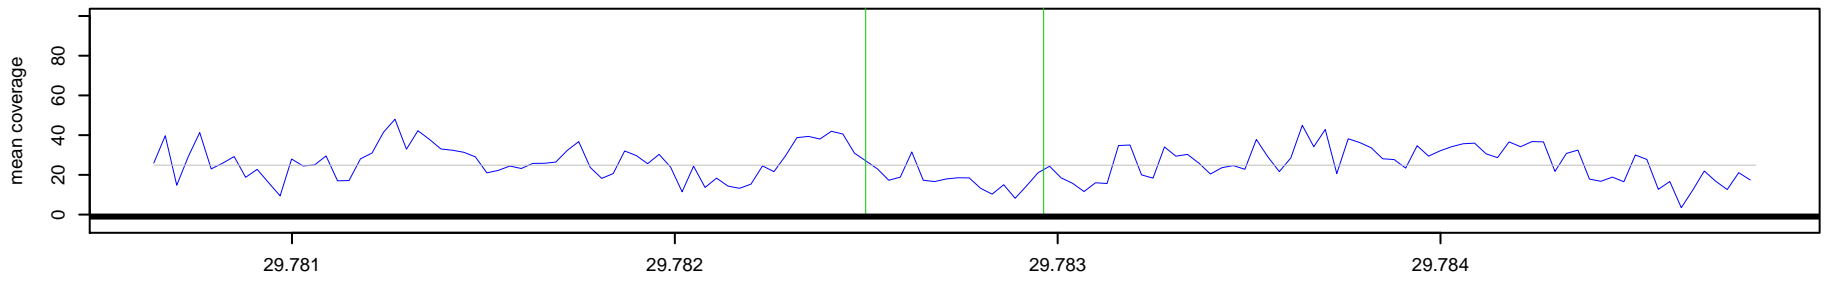

407\_NA10851 Chr 10 : 29782499 – 29782963 , 465 bp (aCGH relative log2ratio= 1.06 )

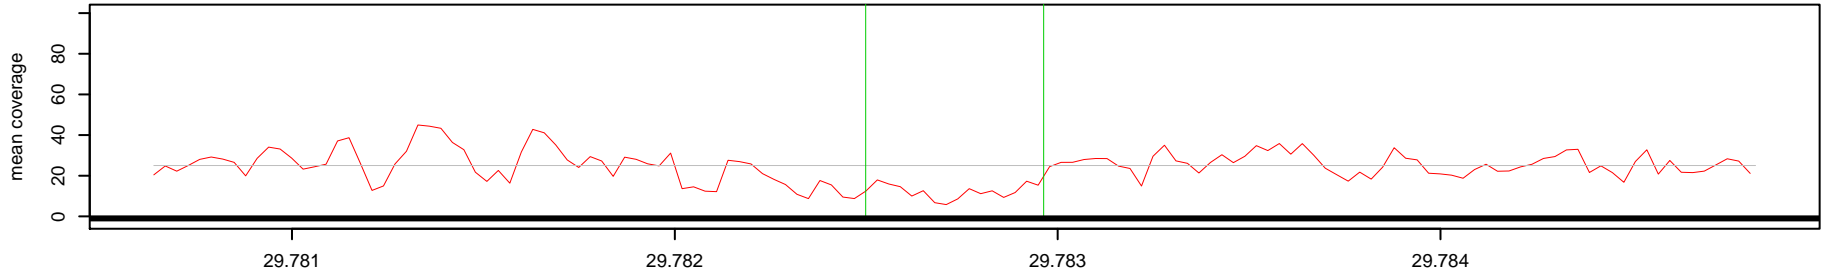

Log2( AK1 read depth / NA10851 read depth)

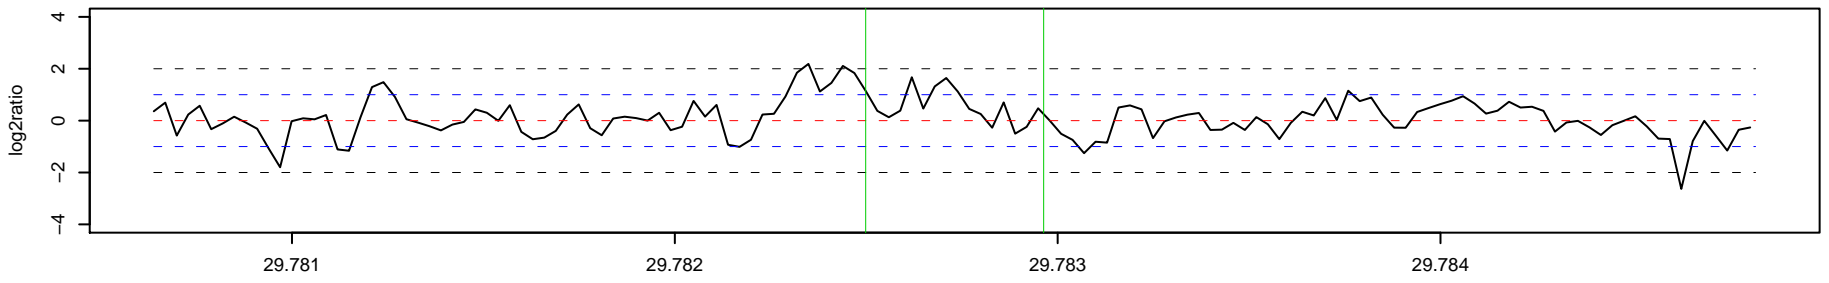

408\_AK1 Chr 10 : 31286901 – 31291817 , 4917 bp (aCGH relative log2ratio= 0.64 )

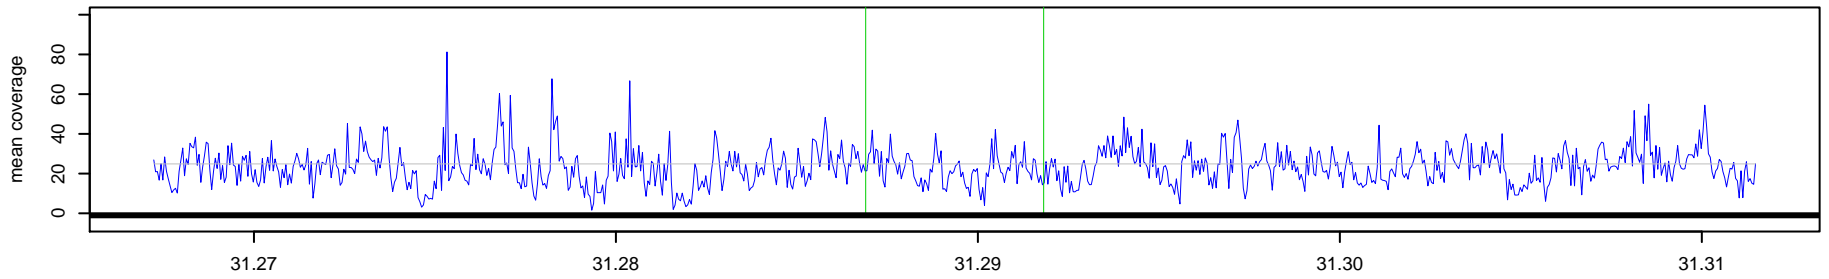

408\_NA10851 Chr 10 : 31286901 – 31291817 , 4917 bp (aCGH relative log2ratio= 0.64 )

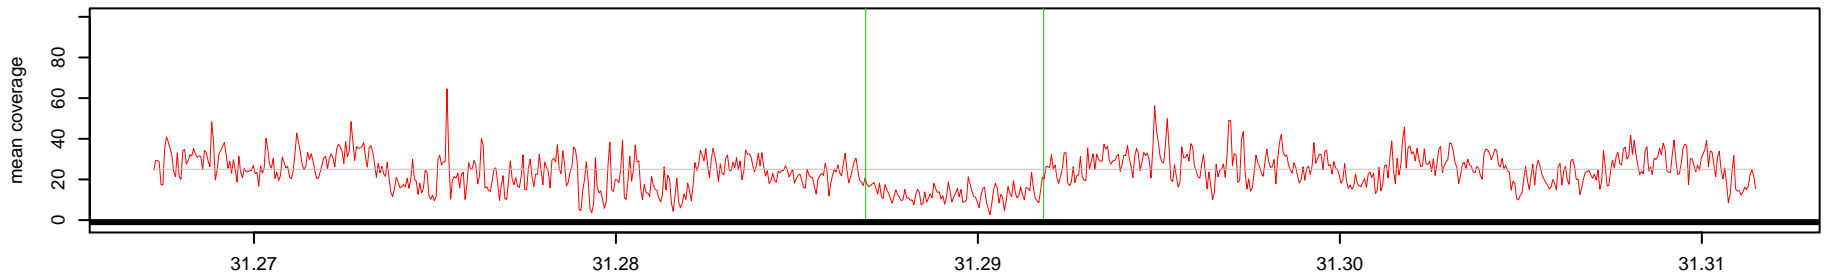

Log2( AK1 read depth / NA10851 read depth)

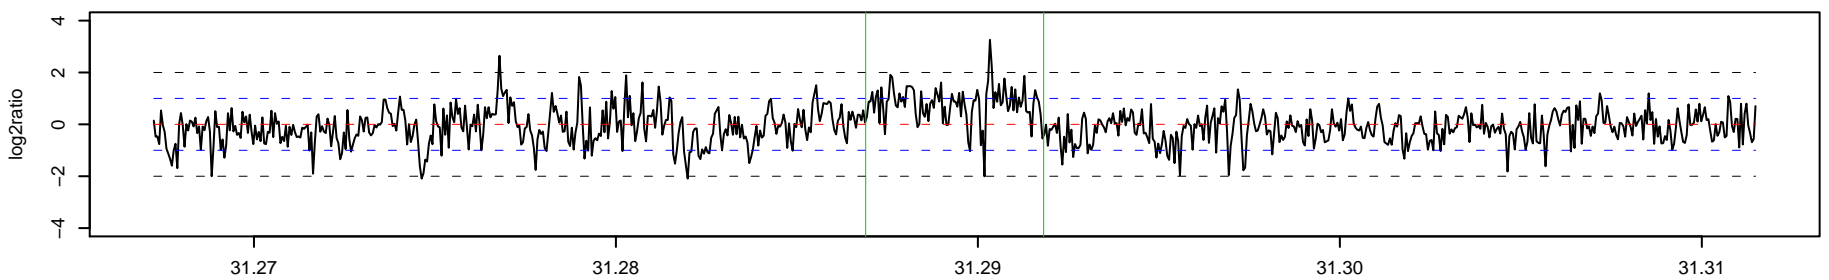



409\_AK1 Chr 10 : 46369276 - 47173791 , 804516 bp (aCGH relative log2ratio= -0.44 )

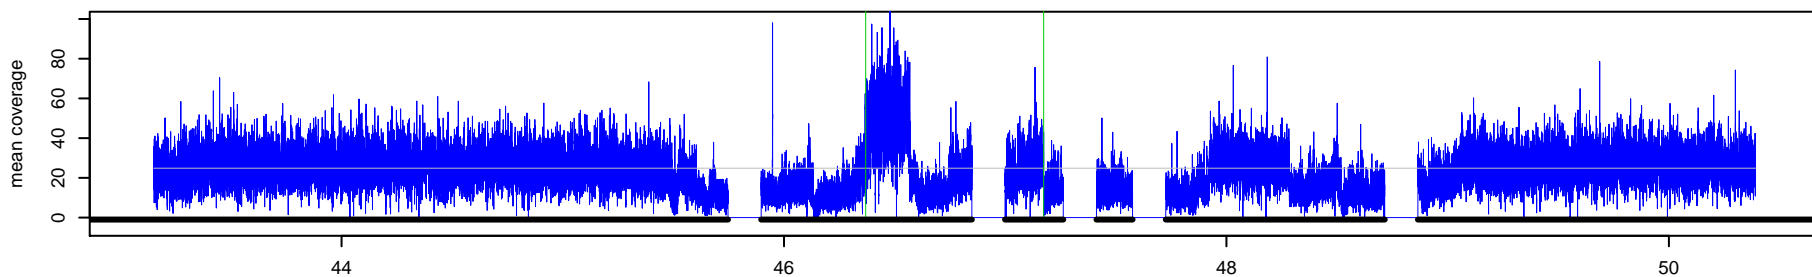

409\_NA10851 Chr 10 : 46369276 - 47173791 , 804516 bp (aCGH relative log2ratio= -0.44 )

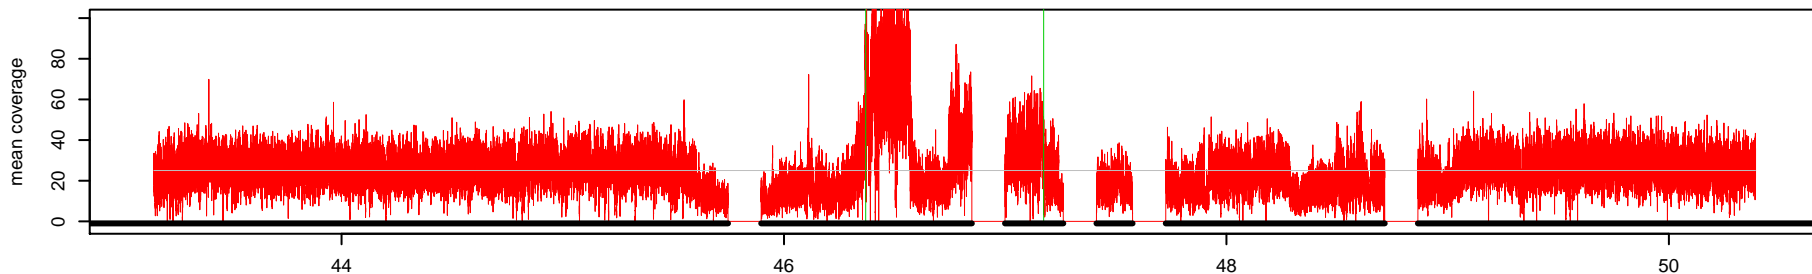

Log2( AK1 read depth / NA10851 read depth)

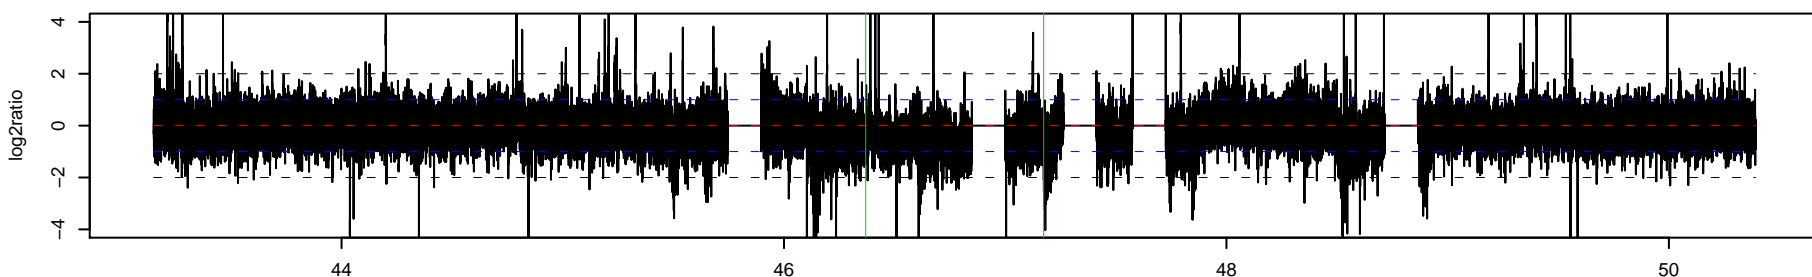

410\_AK1 Chr 10 : 53685714 - 53688233 , 2520 bp (aCGH relative log2ratio= -0.84 )

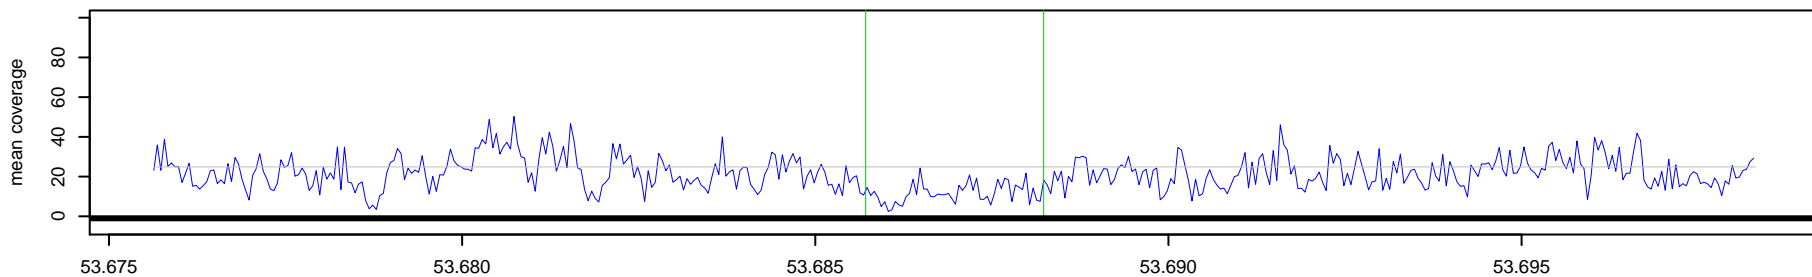

410\_NA10851 Chr 10 : 53685714 - 53688233 , 2520 bp (aCGH relative log2ratio= -0.84 )

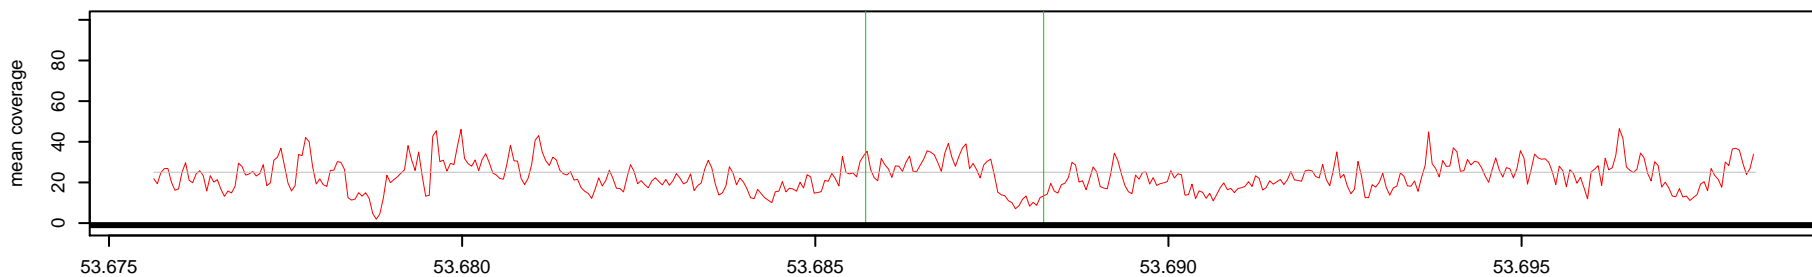

Log2( AK1 read depth / NA10851 read depth)

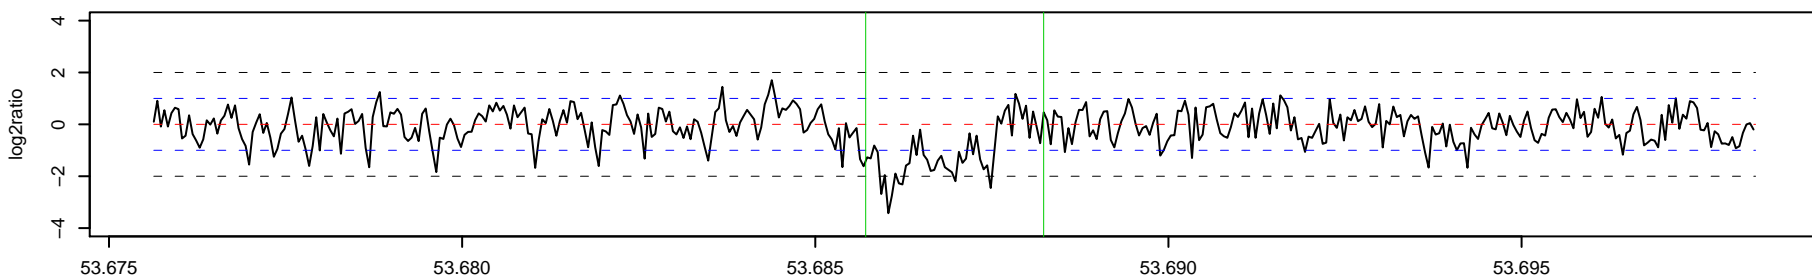

411 \_ AK1 Chr 10 : 56115898 – 56139596 , 23699 bp (aCGH relative log2ratio= -0.73 )

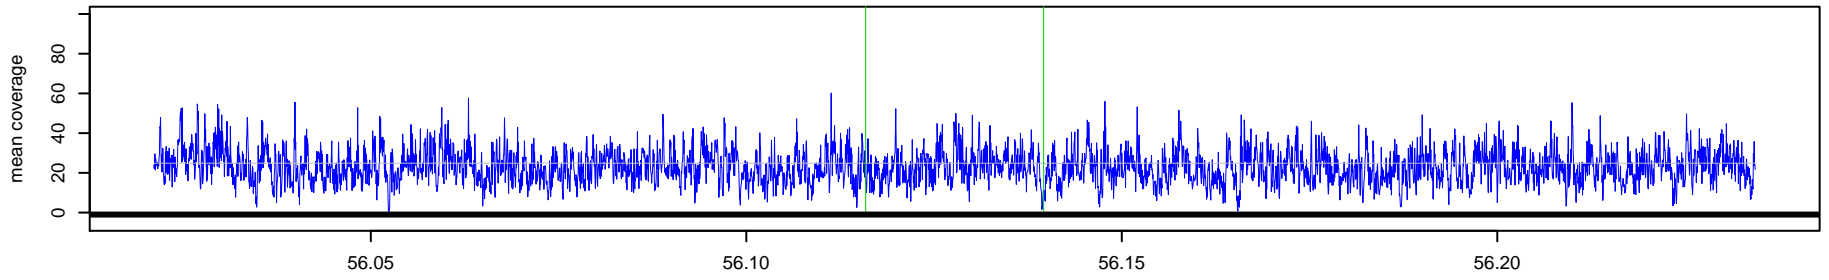

411 \_ NA10851 Chr 10 : 56115898 – 56139596 , 23699 bp (aCGH relative log2ratio= -0.73 )

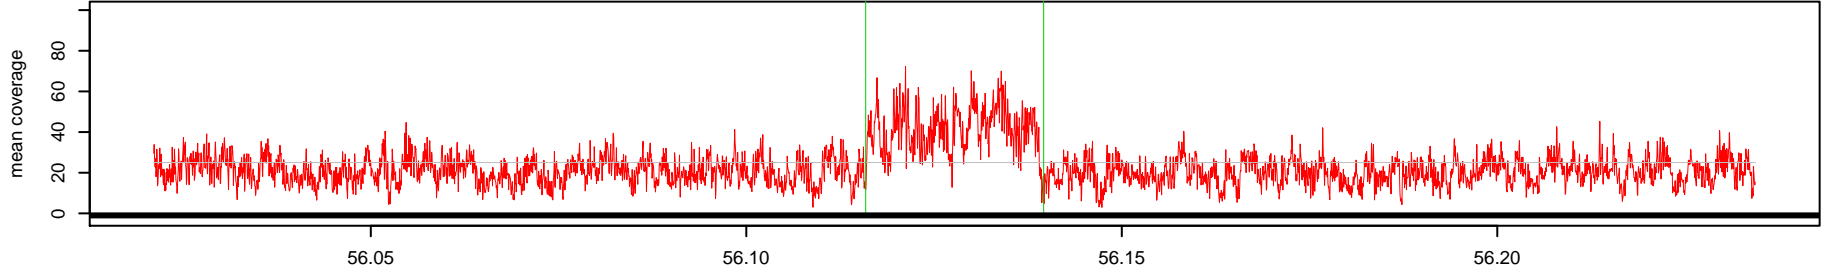

Log2( AK1 read depth / NA10851 read depth)

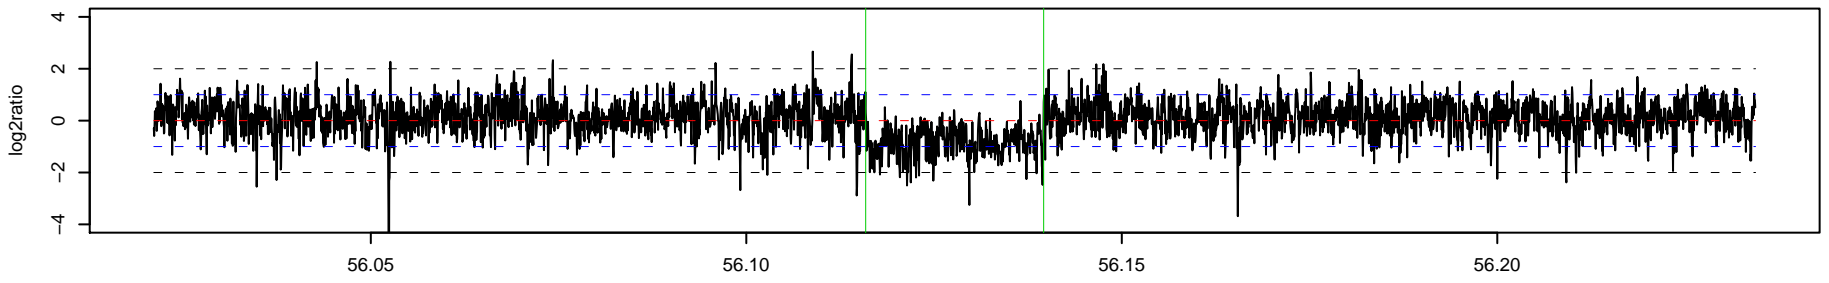

412 \_ AK1 Chr 10 : 58571392 – 58607118 , 35727 bp (aCGH relative log2ratio= -0.84 )

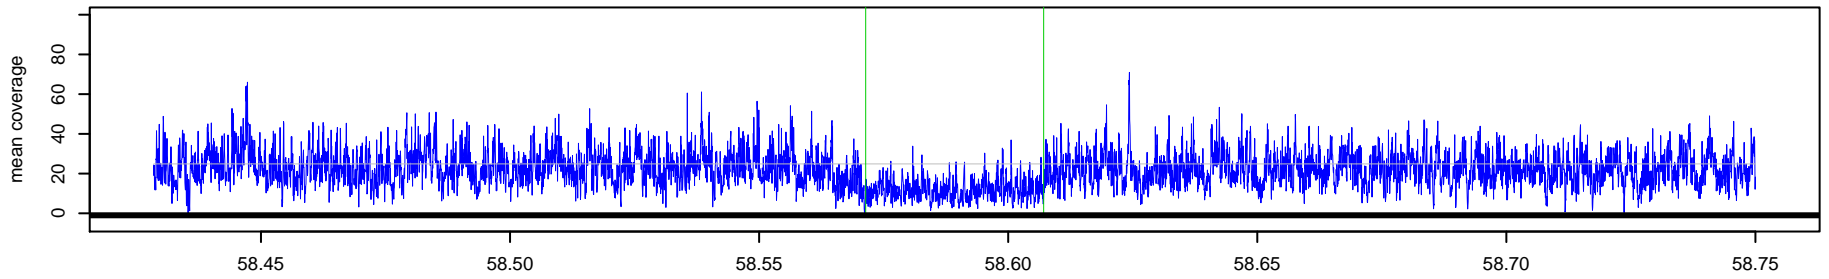

412 \_ NA10851 Chr 10 : 58571392 – 58607118 , 35727 bp (aCGH relative log2ratio= -0.84 )

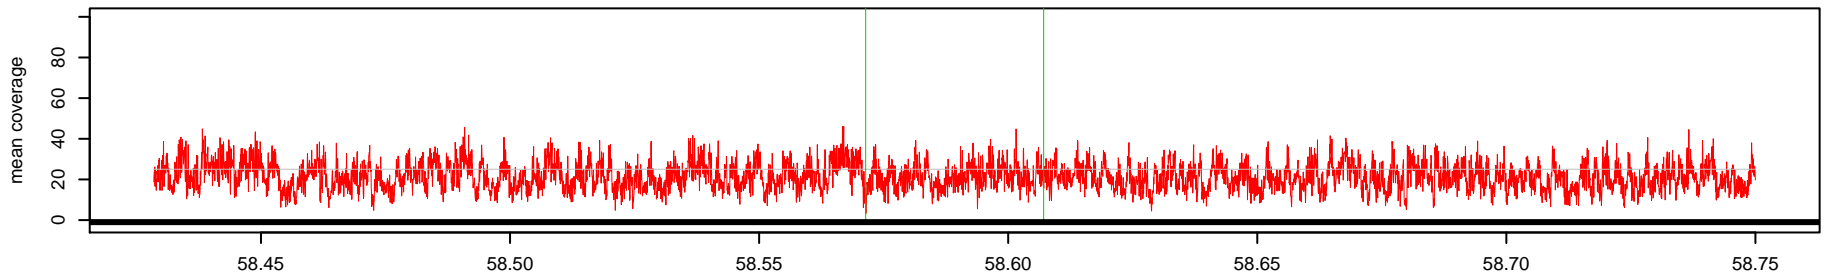

Log2( AK1 read depth / NA10851 read depth)

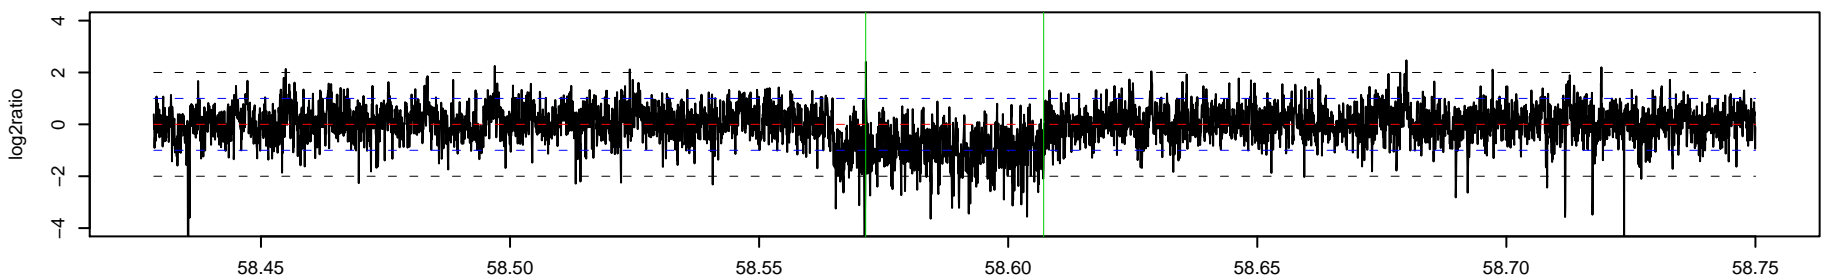

413\_AK1 Chr 10 : 61031752 – 61034932 , 3181 bp (aCGH relative log2ratio= 0.86 )

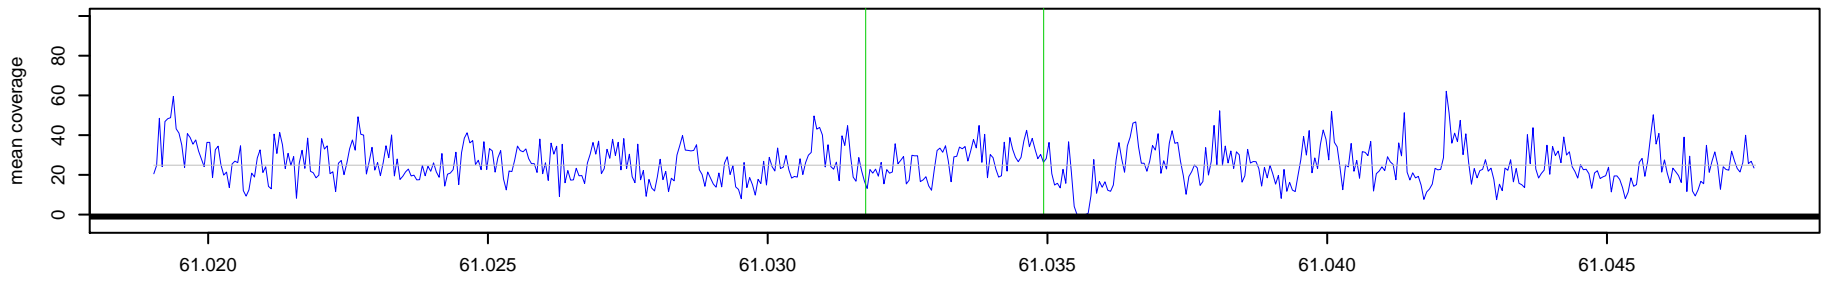

413\_NA10851 Chr 10 : 61031752 – 61034932 , 3181 bp (aCGH relative log2ratio= 0.86 )

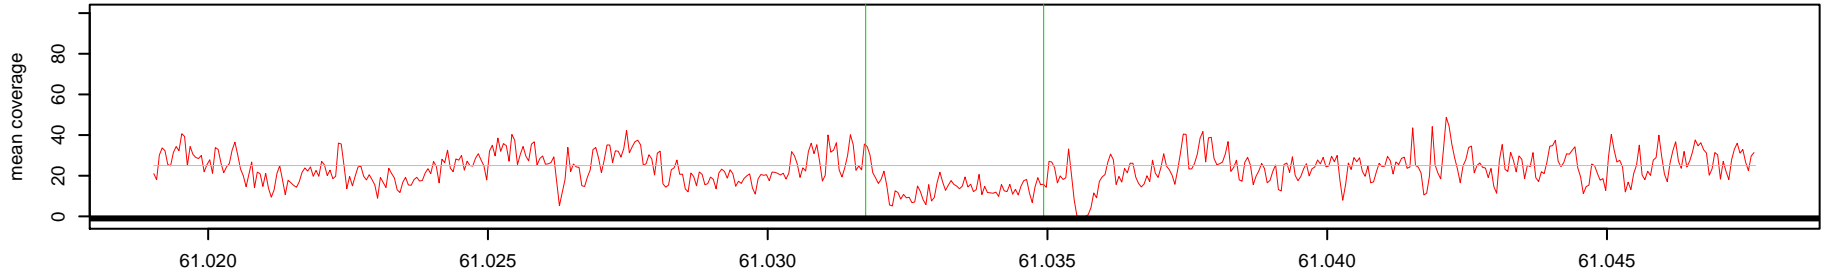

Log2( AK1 read depth / NA10851 read depth)

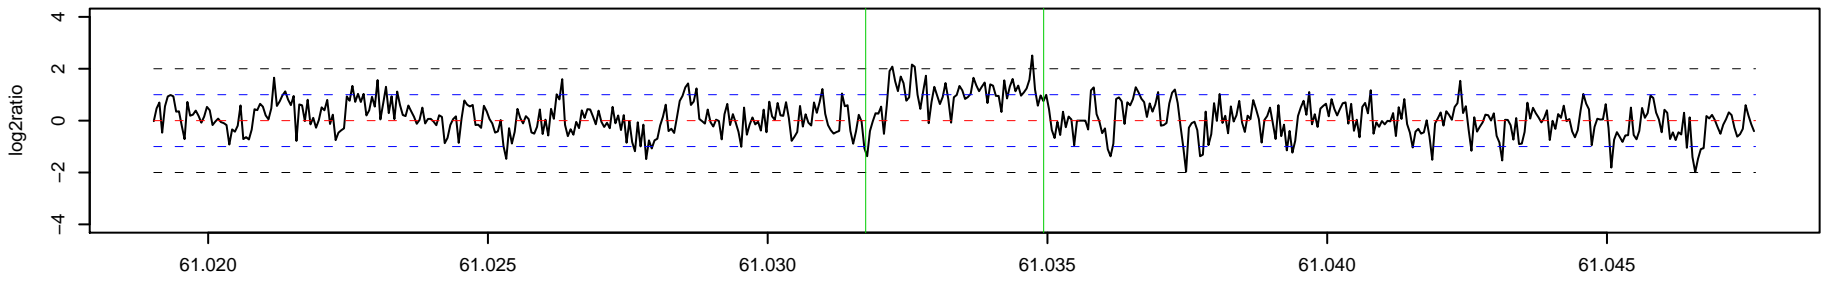

414\_AK1 Chr 10 : 65173022 – 65180859 , 7838 bp (aCGH relative log2ratio= 0.42 )

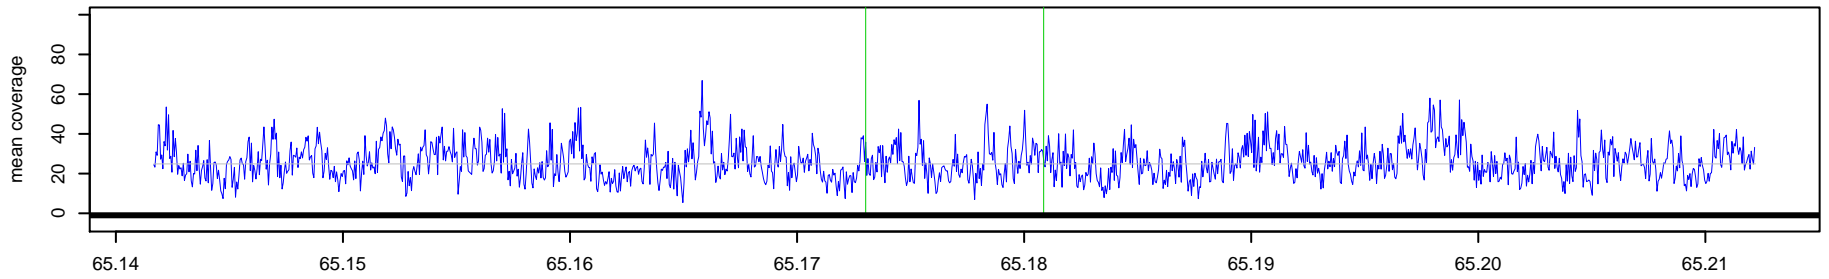

414\_NA10851 Chr 10 : 65173022 – 65180859 , 7838 bp (aCGH relative log2ratio= 0.42 )

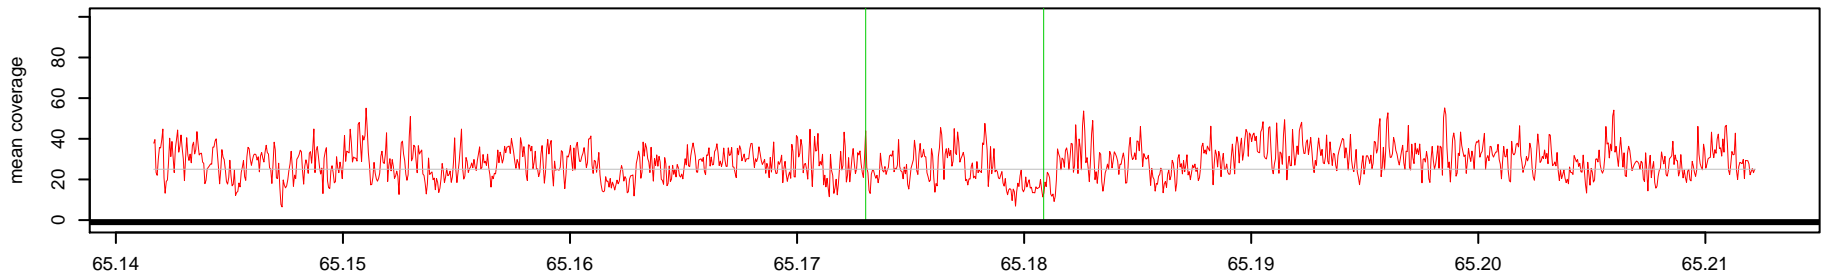

Log2( AK1 read depth / NA10851 read depth)

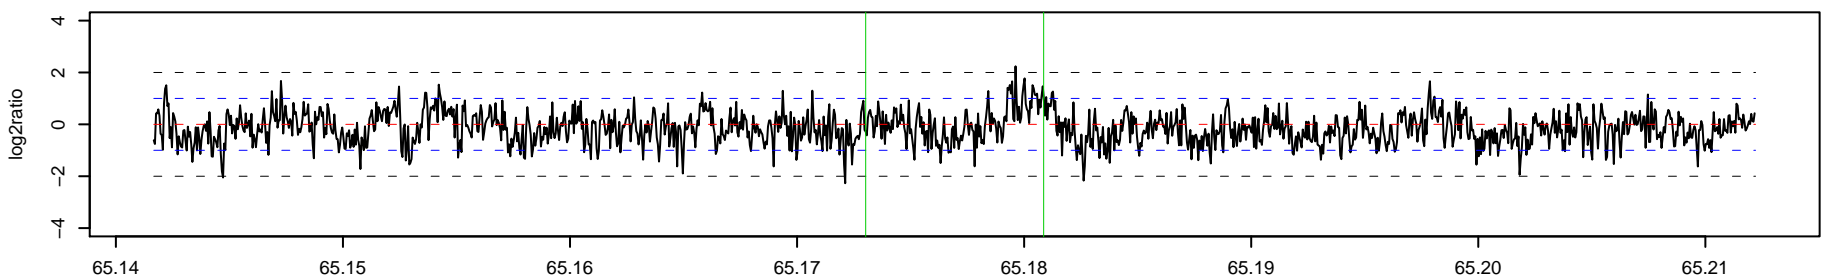

415\_AK1 Chr 10 : 66511606 – 66512096 , 491 bp (aCGH relative log2ratio= 1.27 )

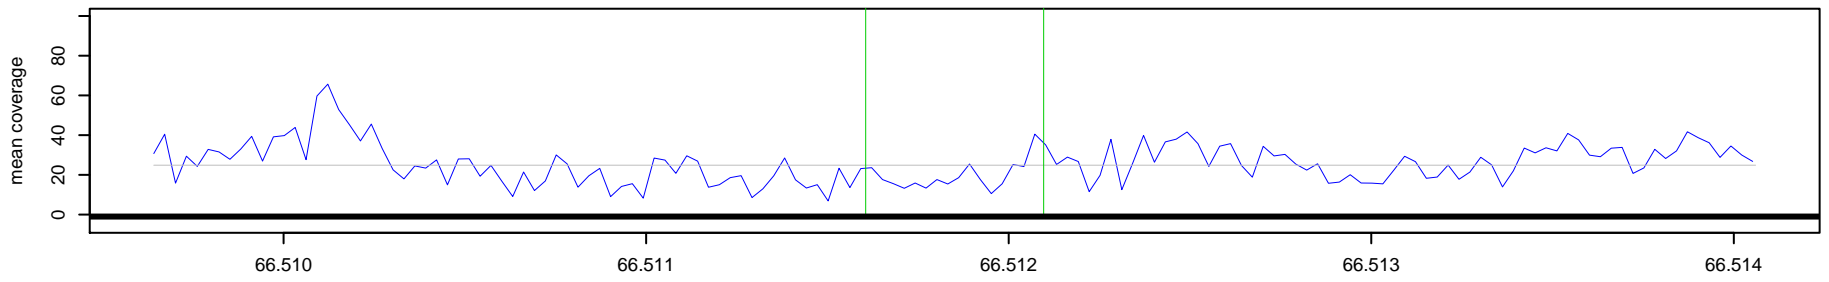

415\_NA10851 Chr 10 : 66511606 – 66512096 , 491 bp (aCGH relative log2ratio= 1.27 )

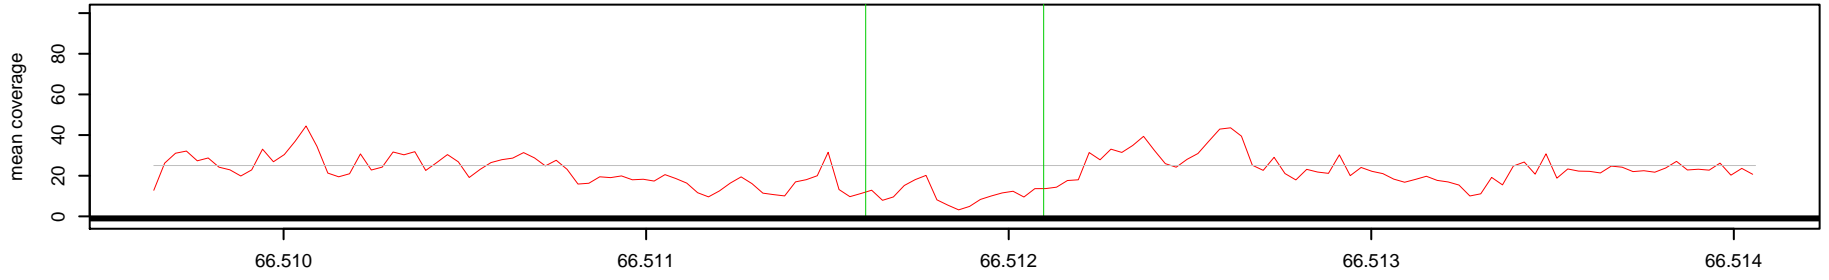

Log2( AK1 read depth / NA10851 read depth)

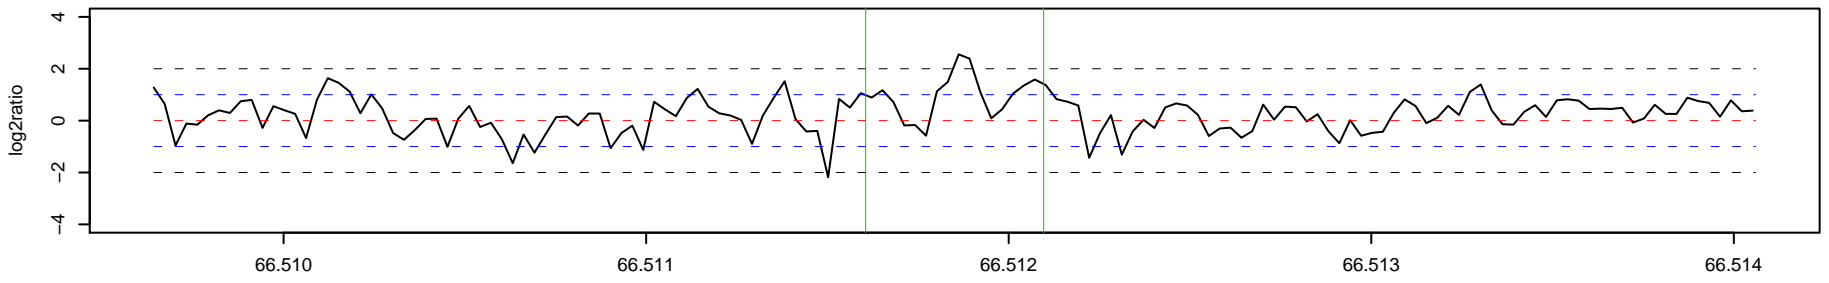

o

416\_AK1 Chr 10 : 66976881 – 66985040 , 8160 bp (aCGH relative log2ratio= -3.71 )

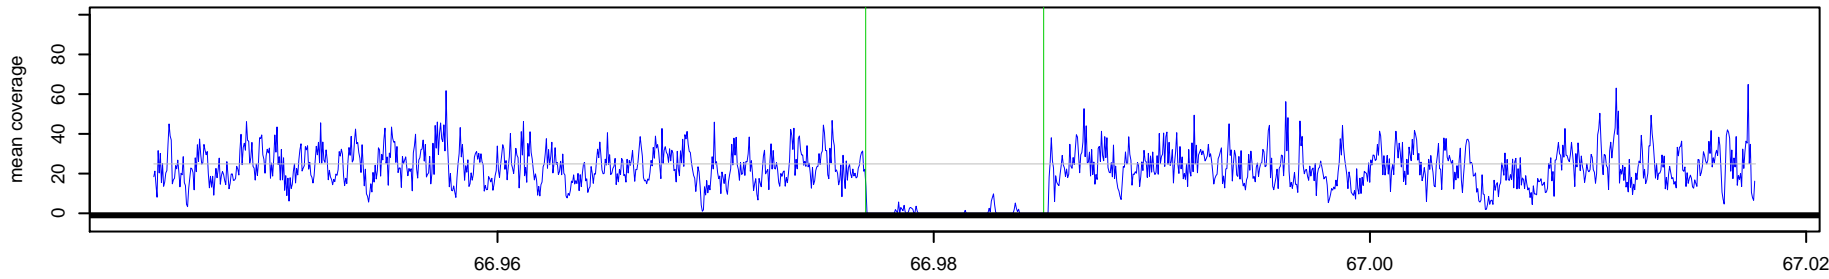

416\_NA10851 Chr 10 : 66976881 – 66985040 , 8160 bp (aCGH relative log2ratio= -3.71 )

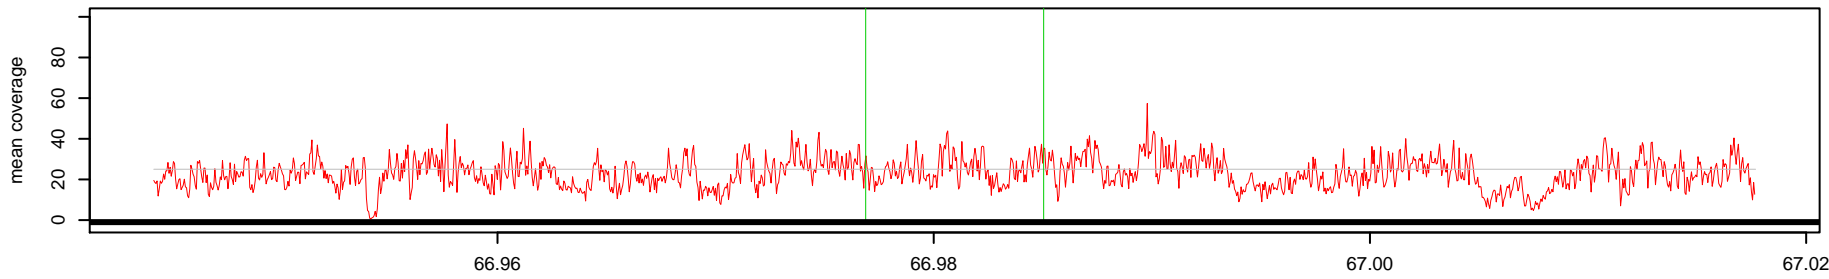

Log2( AK1 read depth / NA10851 read depth)

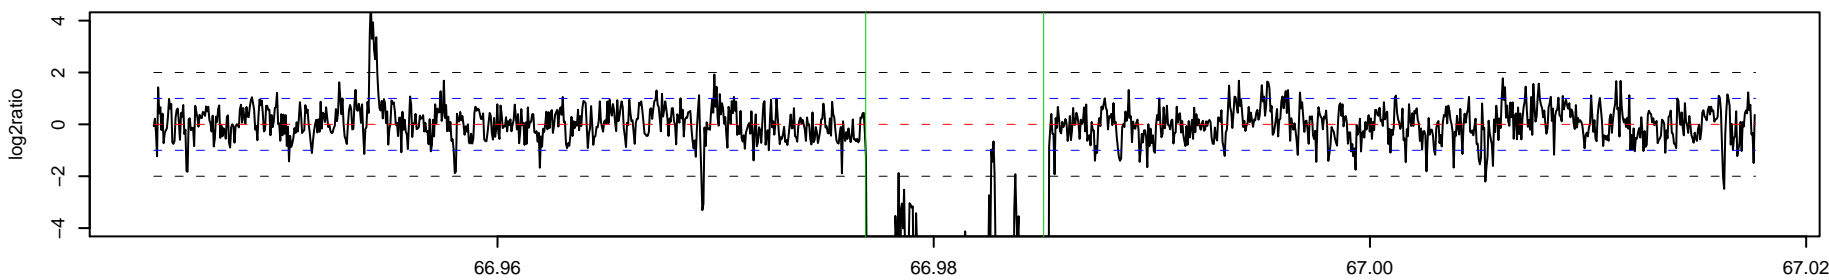

o

417\_AK1 Chr 10 : 72118779 – 72120392 , 1614 bp (aCGH relative log2ratio= 0.59 )

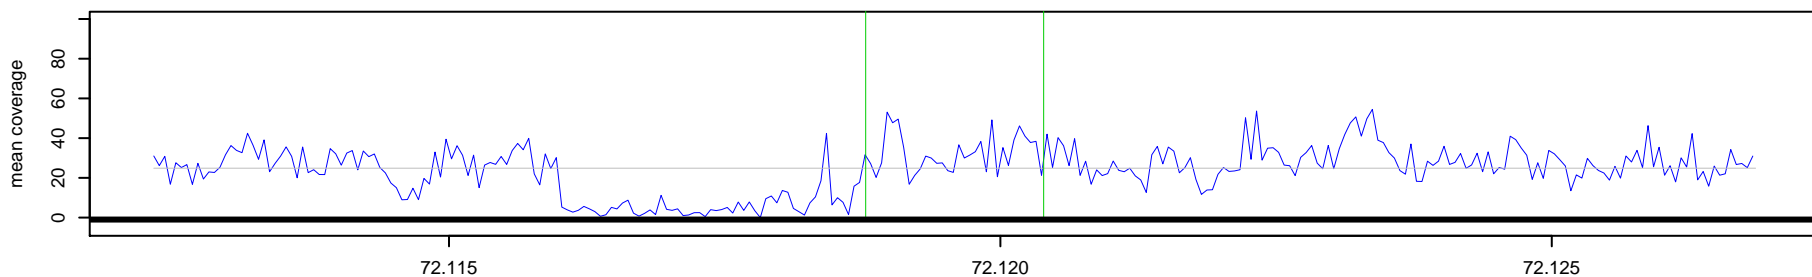

417\_NA10851 Chr 10 : 72118779 – 72120392 , 1614 bp (aCGH relative log2ratio= 0.59 )

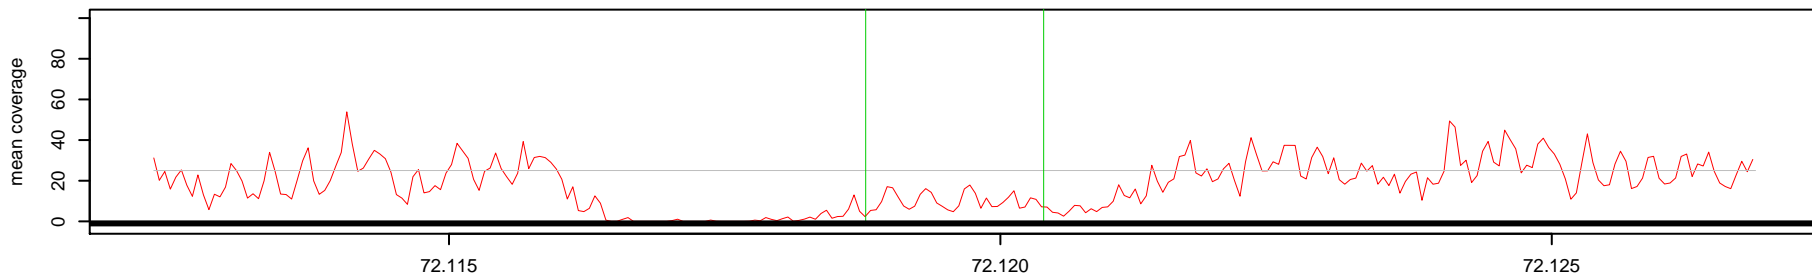

Log2( AK1 read depth / NA10851 read depth)

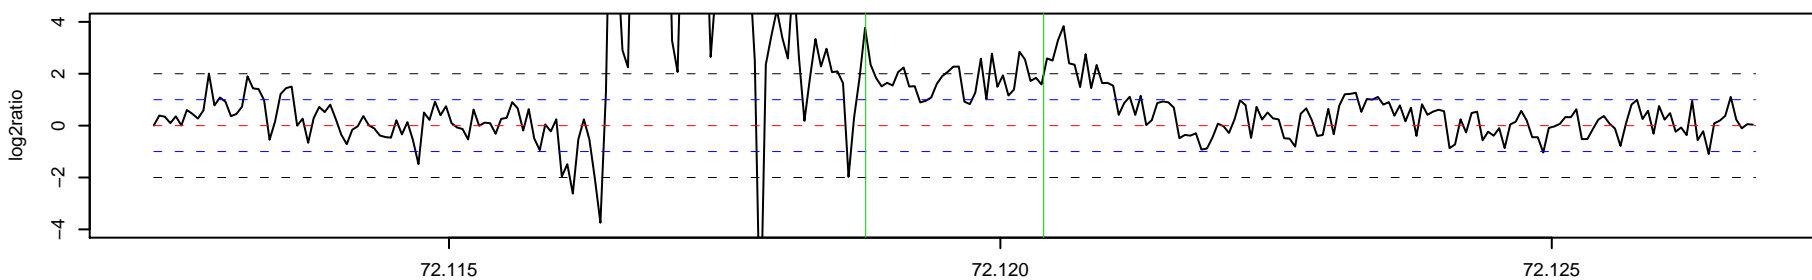

o

o

418\_AK1 Chr 10 : 77926190 – 77928899 , 2710 bp (aCGH relative log2ratio= 3.34 )

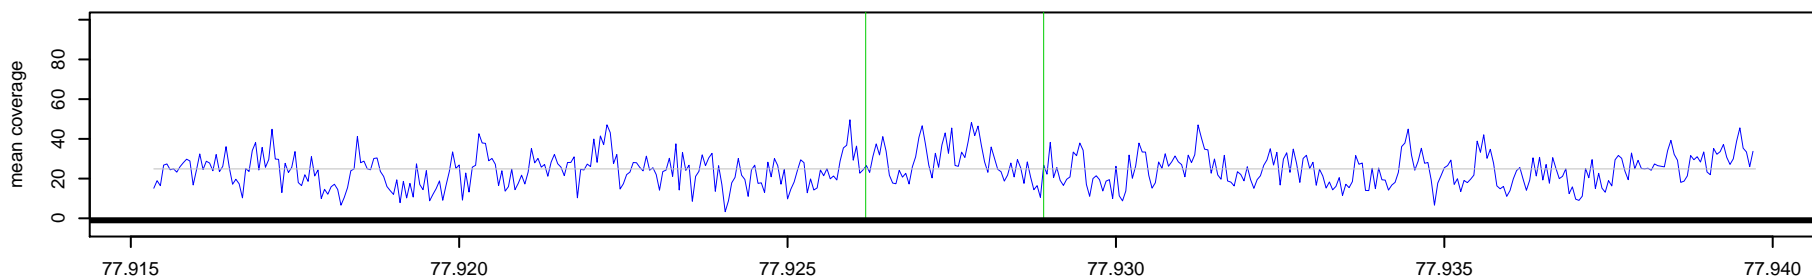

418\_NA10851 Chr 10 : 77926190 – 77928899 , 2710 bp (aCGH relative log2ratio= 3.34 )

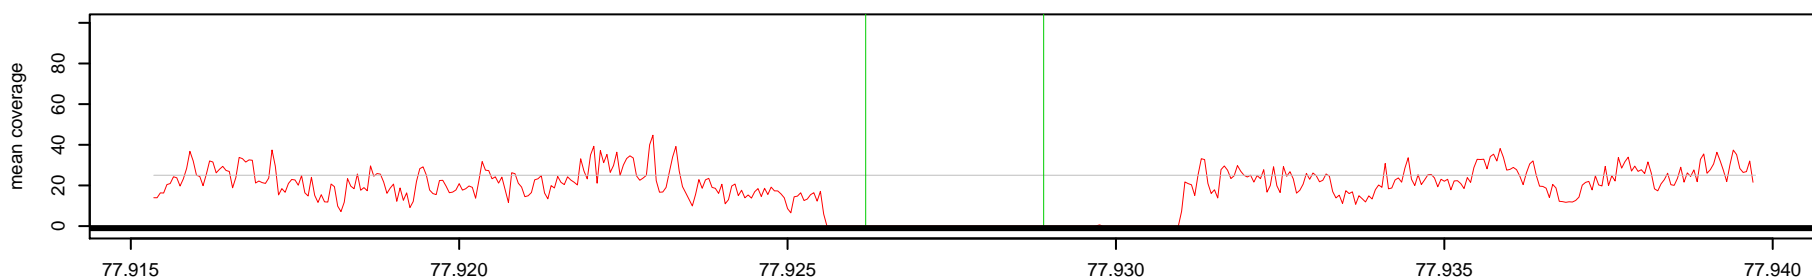

Log2( AK1 read depth / NA10851 read depth)

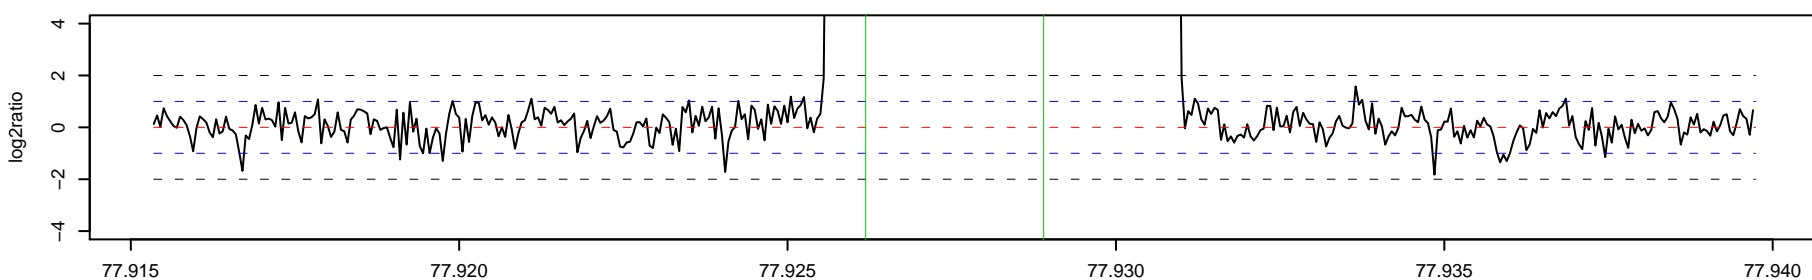

419\_AK1 Chr 10 : 85512623 – 85513873 , 1251 bp (aCGH relative log2ratio= 0.99 )

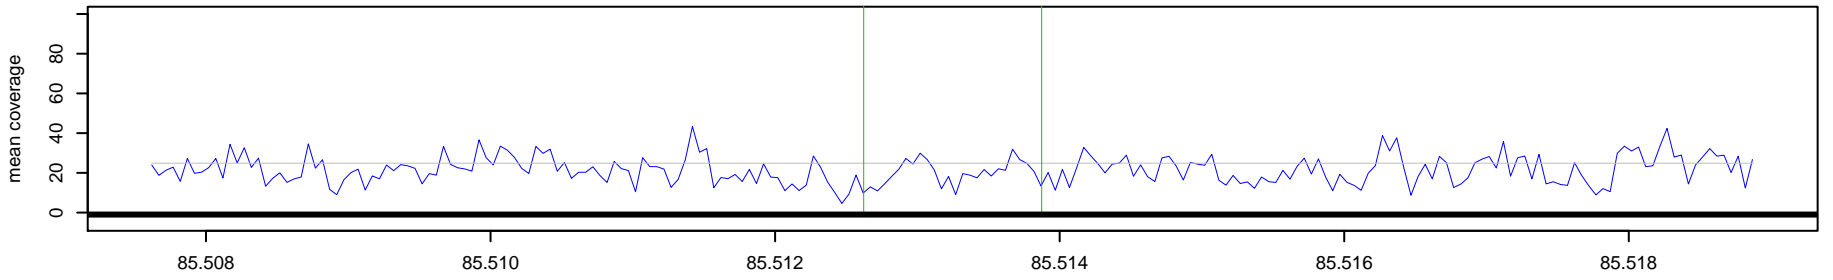

419\_NA10851 Chr 10 : 85512623 – 85513873 , 1251 bp (aCGH relative log2ratio= 0.99 )

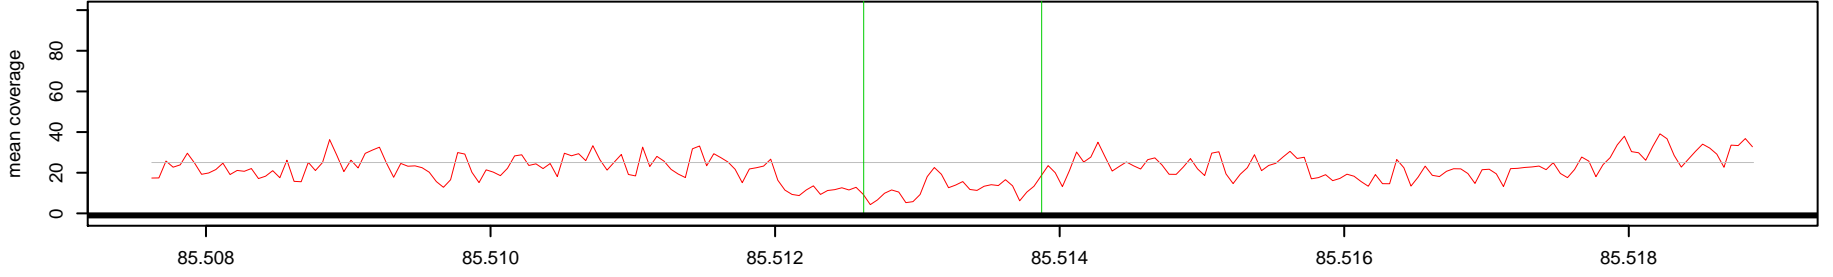

Log2( AK1 read depth / NA10851 read depth)

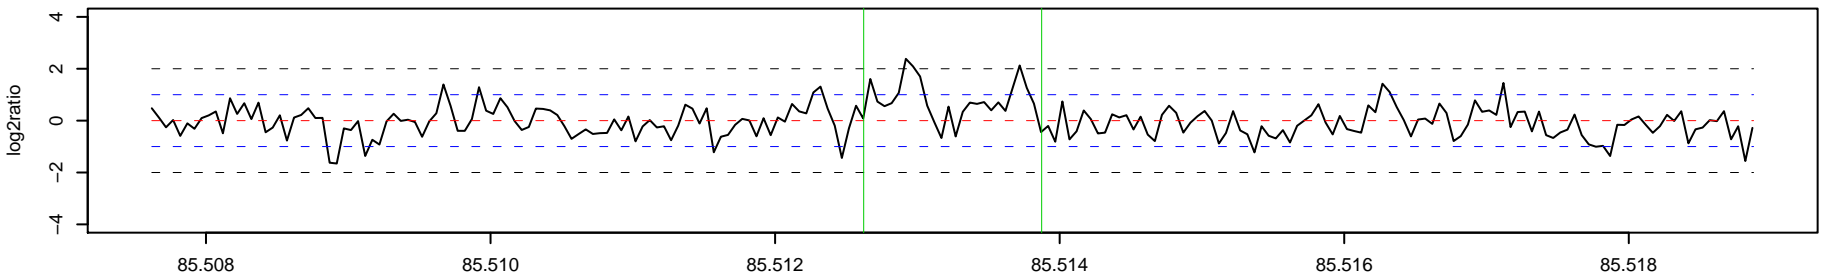

420\_AK1 Chr 10 : 89264968 – 89266717 , 1750 bp (aCGH relative log2ratio= 0.66 )

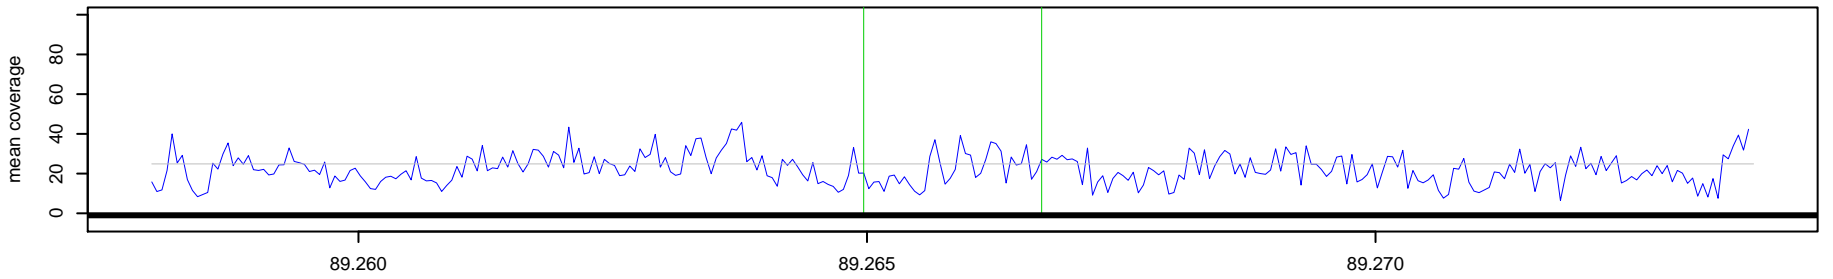

420\_NA10851 Chr 10 : 89264968 – 89266717 , 1750 bp (aCGH relative log2ratio= 0.66 )

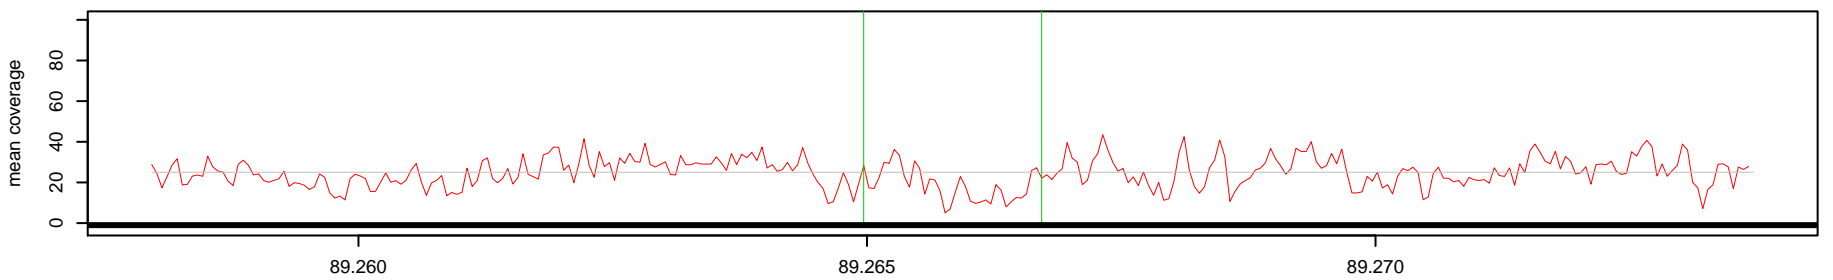

Log2( AK1 read depth / NA10851 read depth)

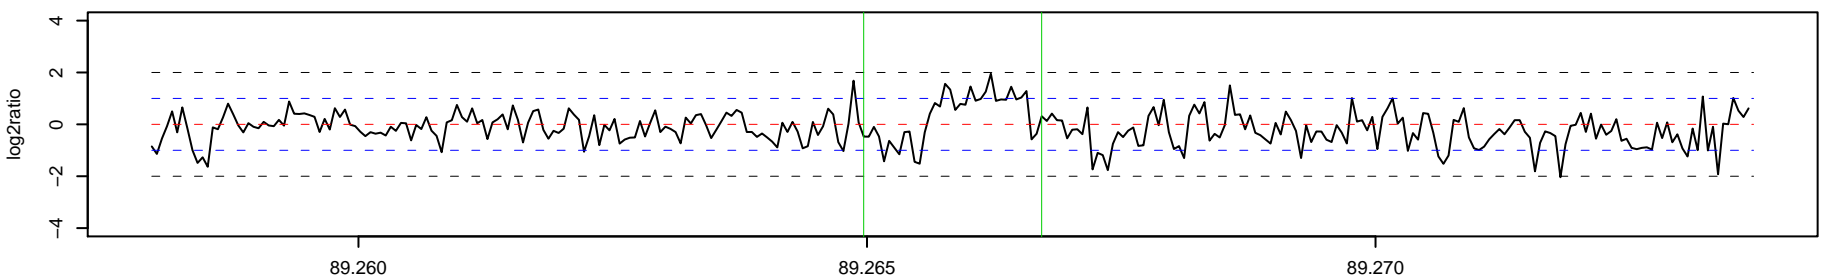

421 \_ AK1 Chr 10 : 89643221 - 89643753 , 533 bp (aCGH relative log2ratio= 0.69 )

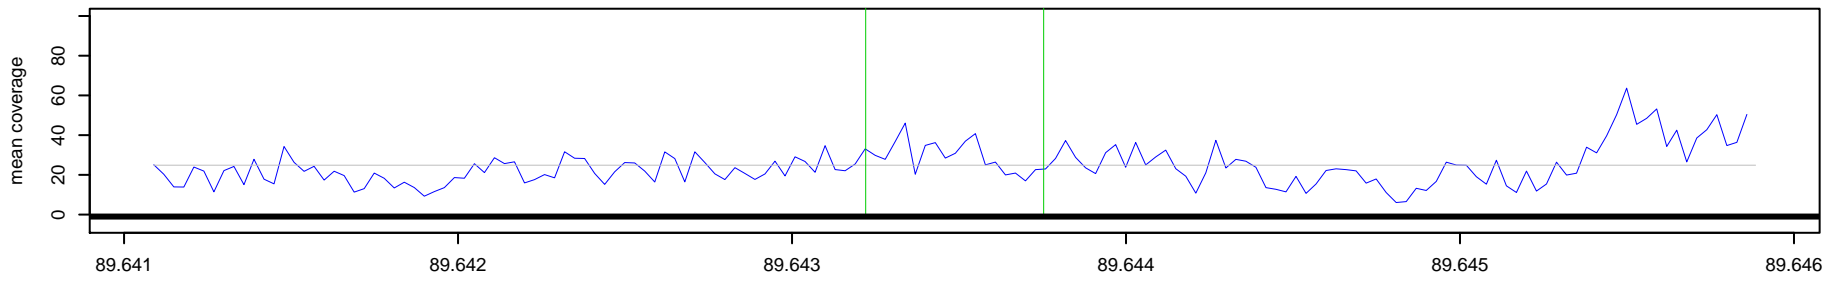

421 \_ NA10851 Chr 10 : 89643221 - 89643753 , 533 bp (aCGH relative log2ratio= 0.69 )

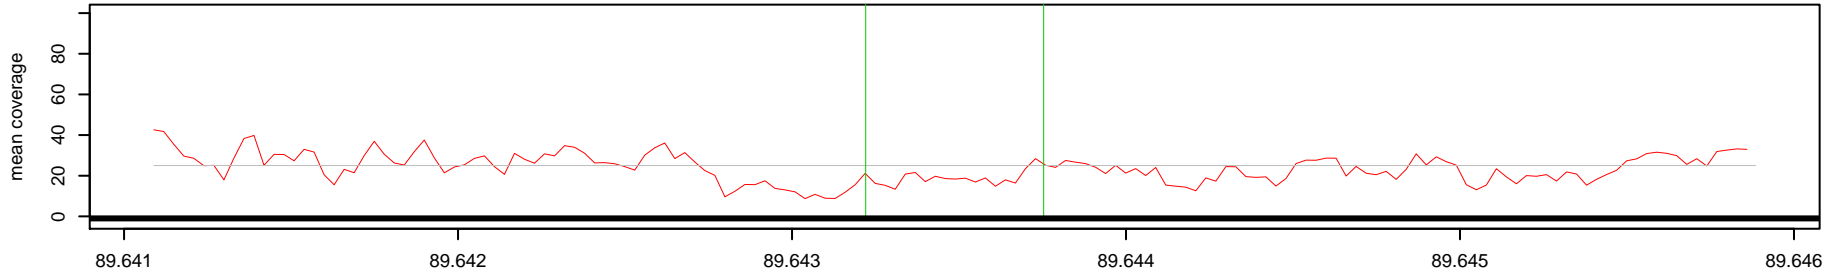

Log2( AK1 read depth / NA10851 read depth)

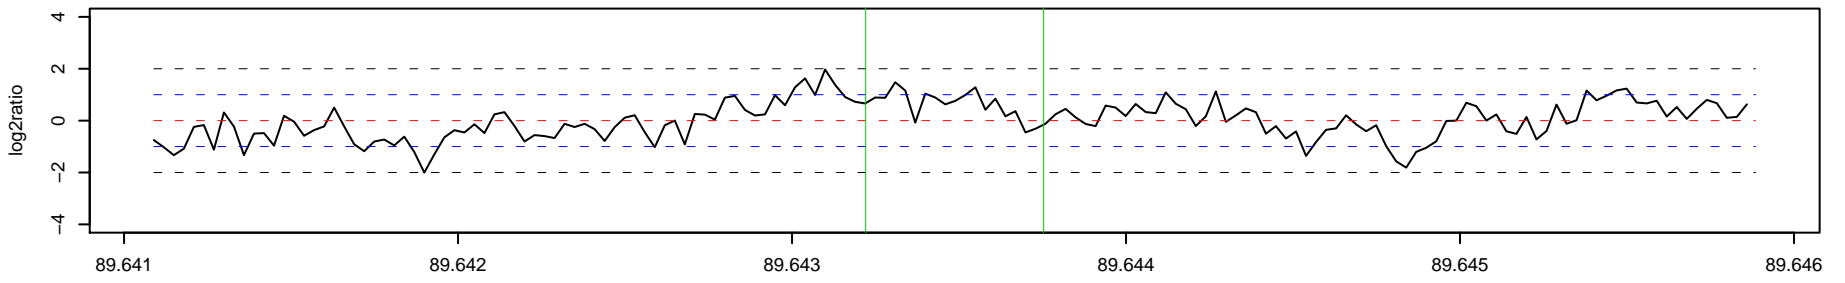

422 \_ AK1 Chr 10 : 95031903 - 95035675 , 3773 bp (aCGH relative log2ratio= -0.82 )

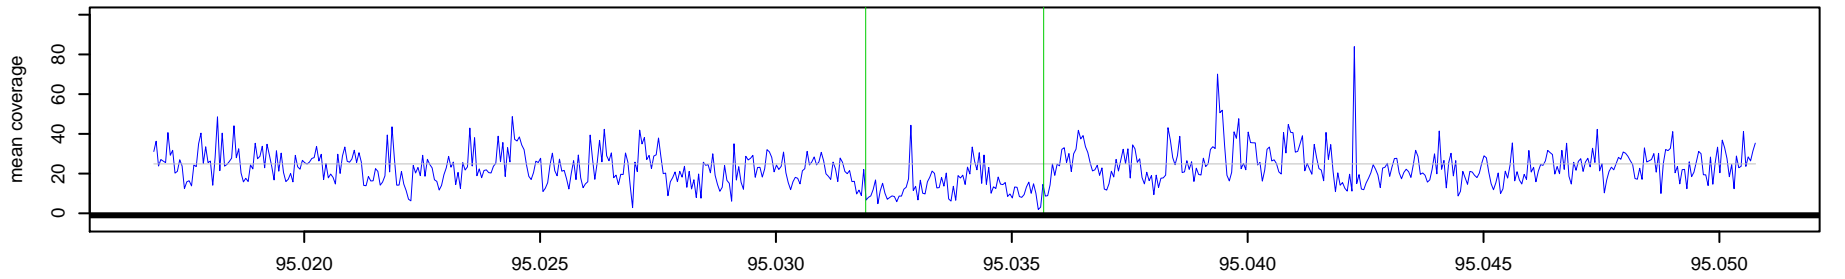

422 \_ NA10851 Chr 10 : 95031903 - 95035675 , 3773 bp (aCGH relative log2ratio= -0.82 )

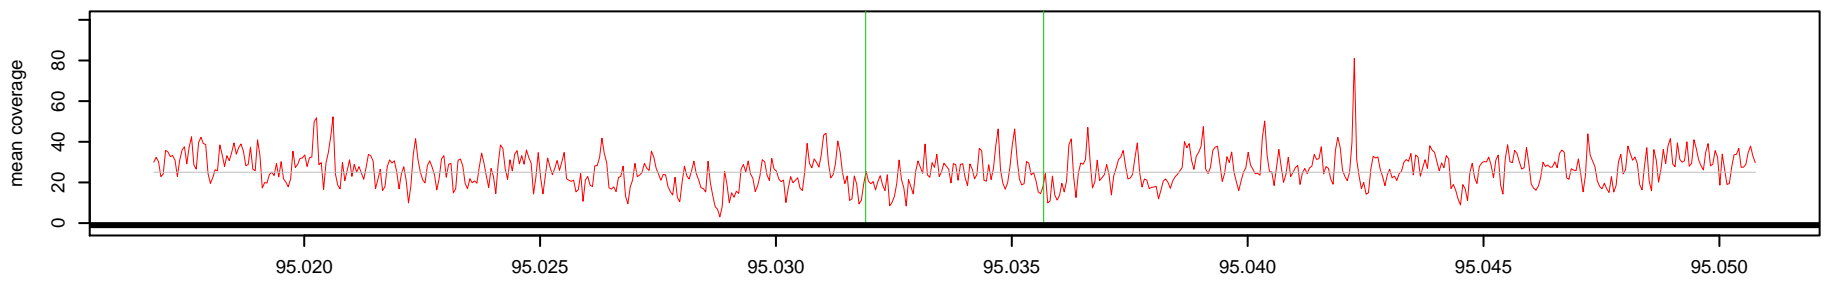

Log2( AK1 read depth / NA10851 read depth)

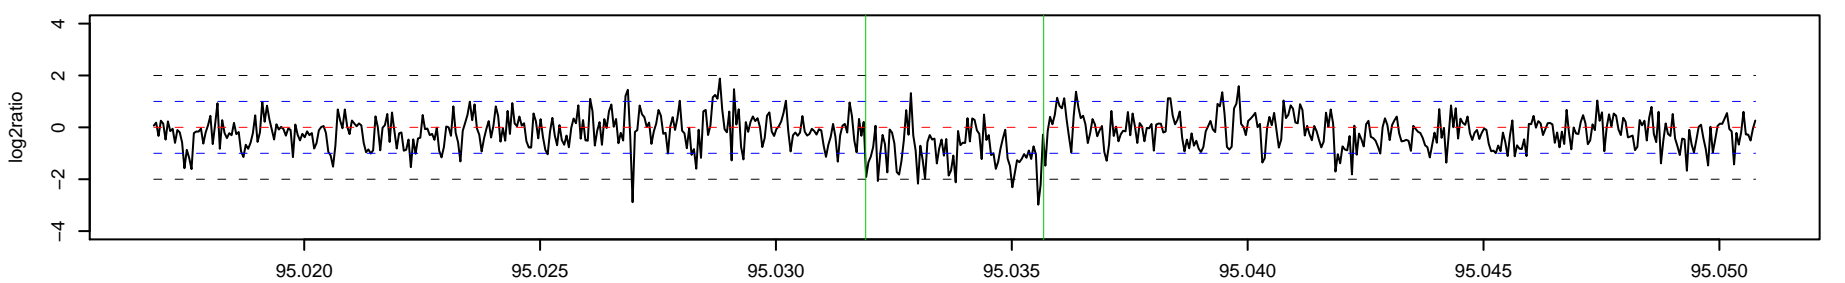

423 \_ AK1 Chr 10 : 102148788 – 102149609 , 822 bp (aCGH relative log2ratio= -0.86 )

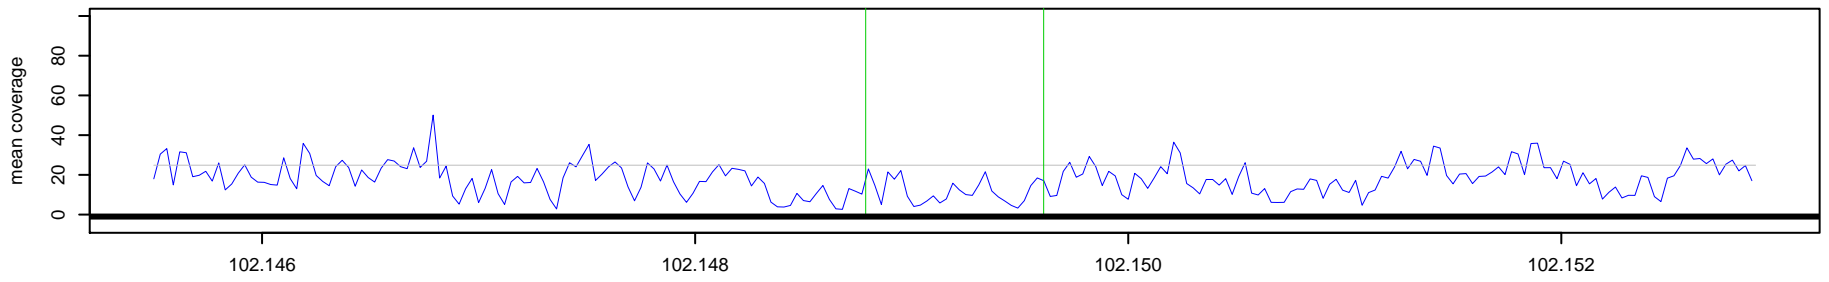

423 \_ NA10851 Chr 10 : 102148788 – 102149609 , 822 bp (aCGH relative log2ratio= -0.86 )

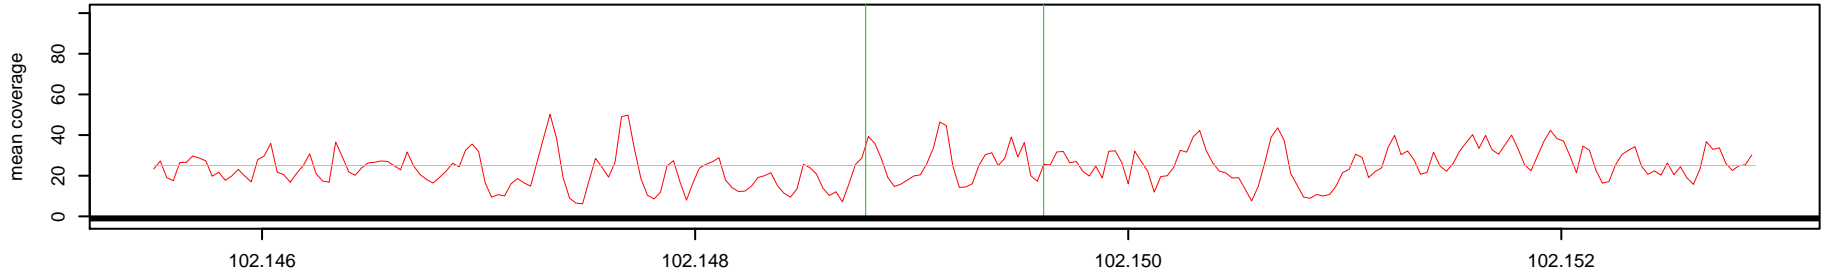

Log2( AK1 read depth / NA10851 read depth)

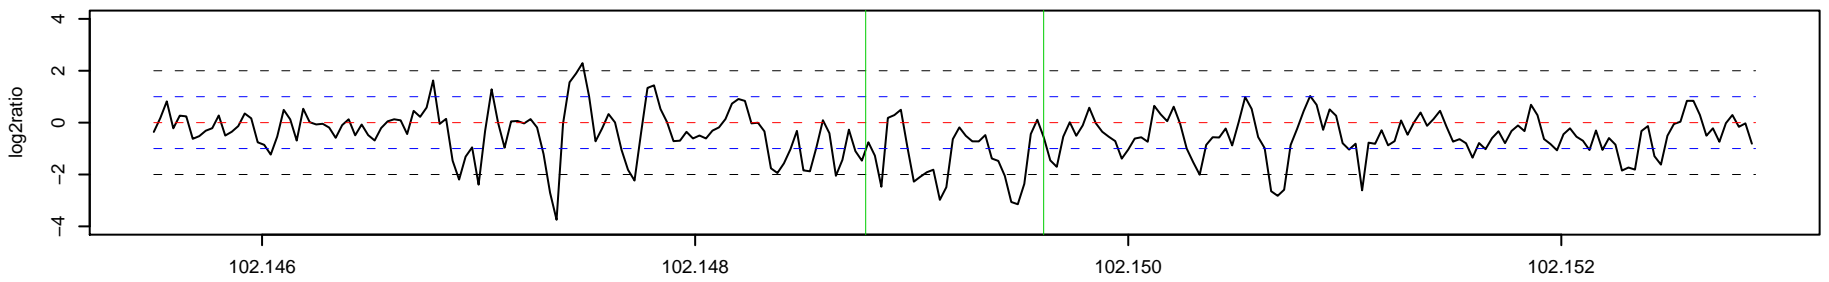

424 \_ AK1 Chr 10 : 107940961 – 107941506 , 546 bp (aCGH relative log2ratio= -2.55 )

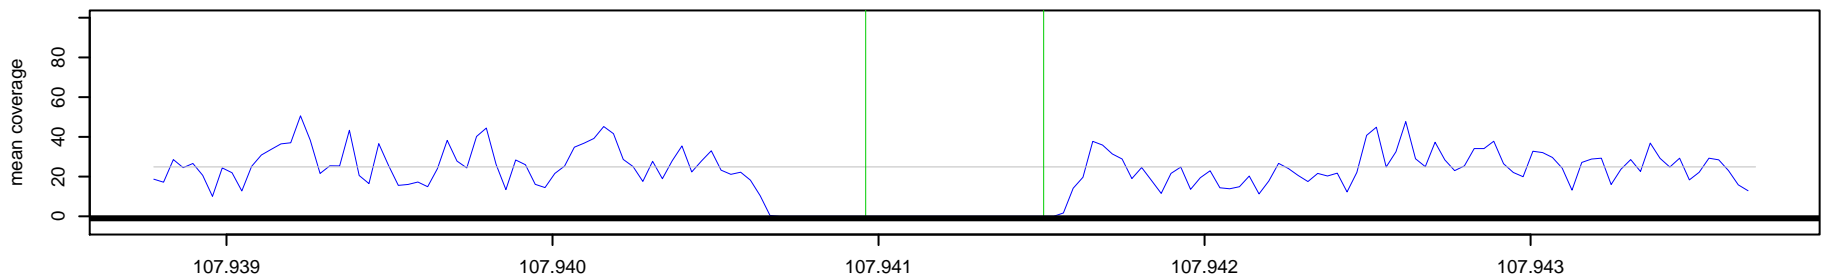

424 \_ NA10851 Chr 10 : 107940961 – 107941506 , 546 bp (aCGH relative log2ratio= -2.55 )

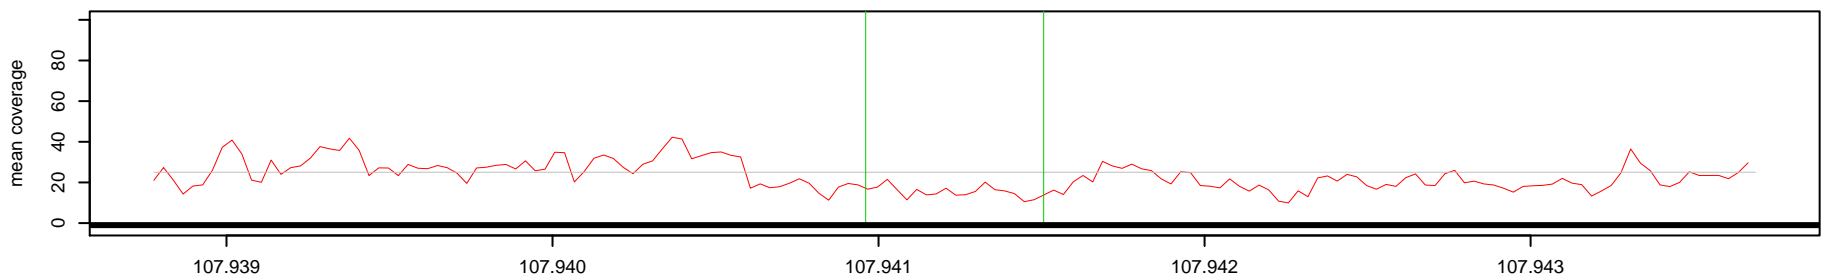

Log2( AK1 read depth / NA10851 read depth)

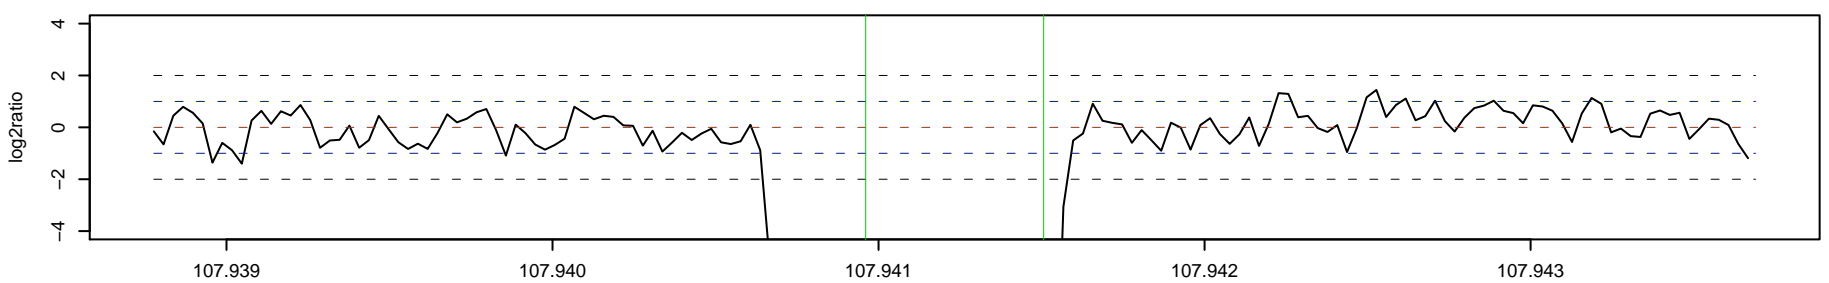



425 \_ AK1 Chr 10 : 107985934 – 107987886 , 1953 bp (aCGH relative log2ratio= 0.81 )

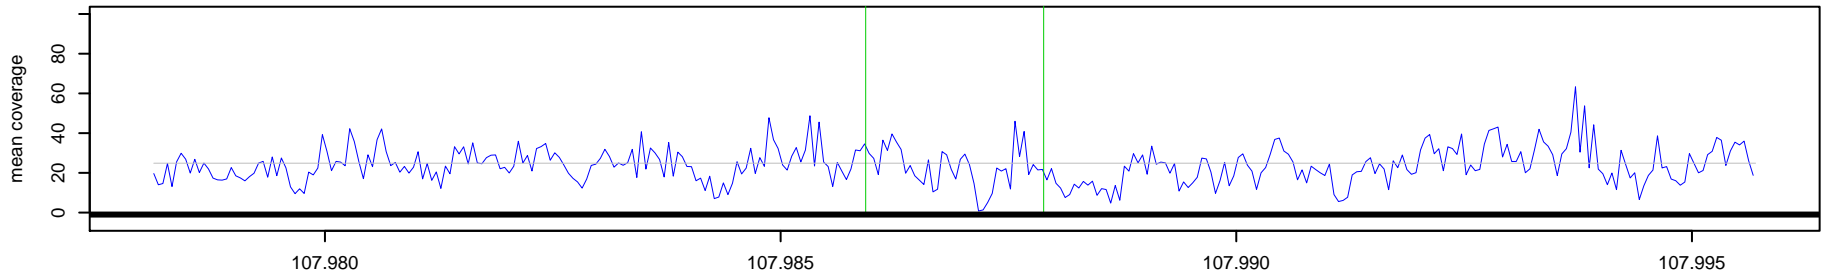

425 \_ NA10851 Chr 10 : 107985934 – 107987886 , 1953 bp (aCGH relative log2ratio= 0.81 )

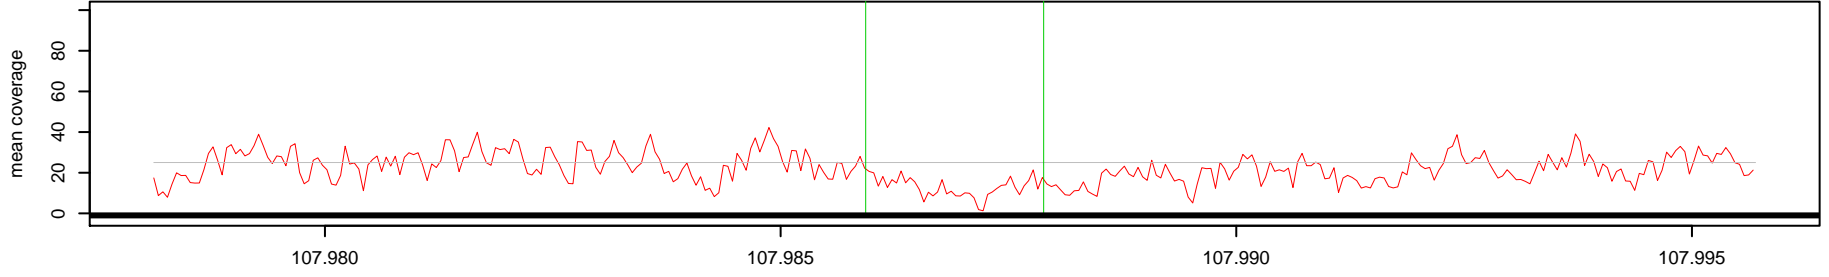

Log2( AK1 read depth / NA10851 read depth)

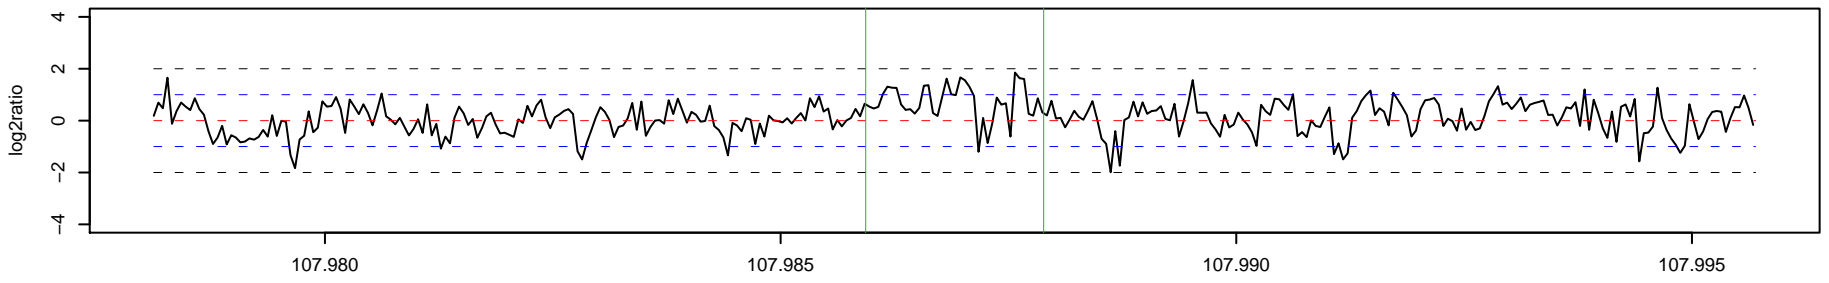

426 \_ AK1 Chr 10 : 117512538 – 117523805 , 11268 bp (aCGH relative log2ratio= -0.87 )

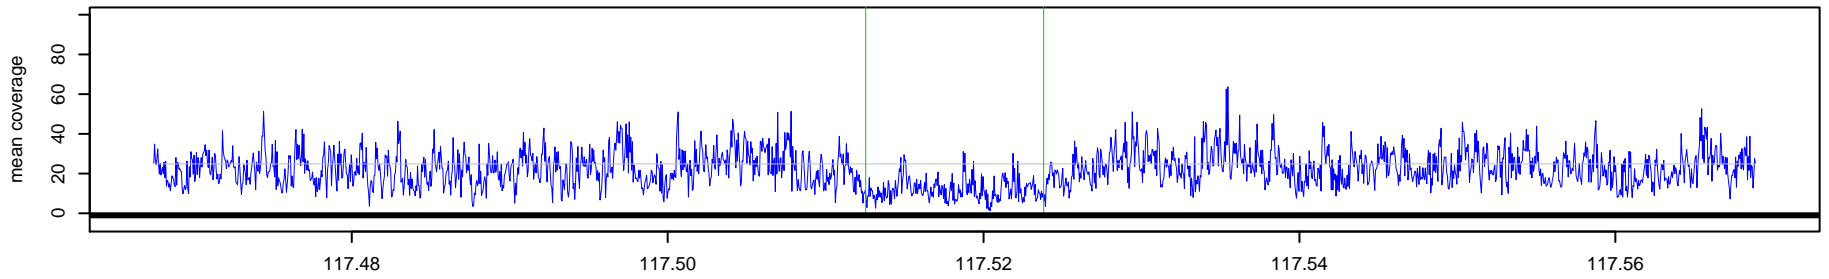

426 \_ NA10851 Chr 10 : 117512538 – 117523805 , 11268 bp (aCGH relative log2ratio= -0.87 )

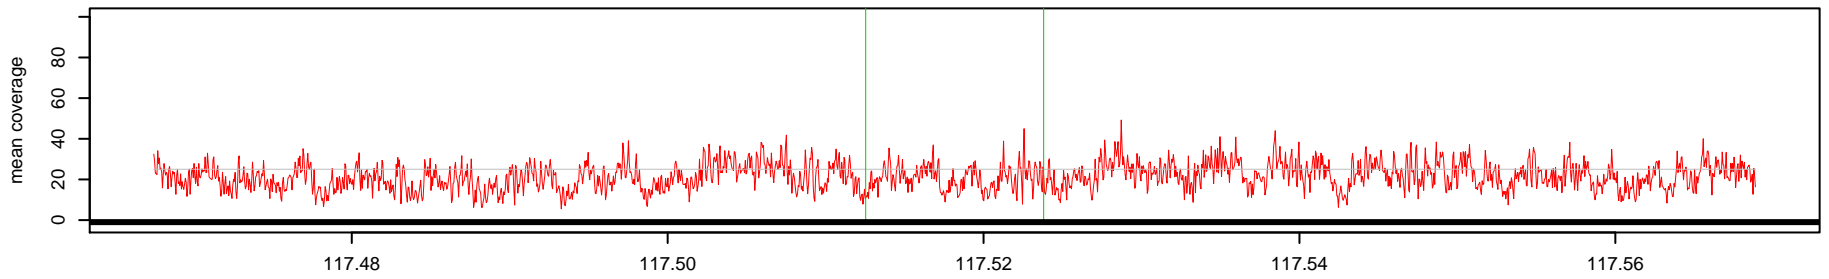

Log2( AK1 read depth / NA10851 read depth)

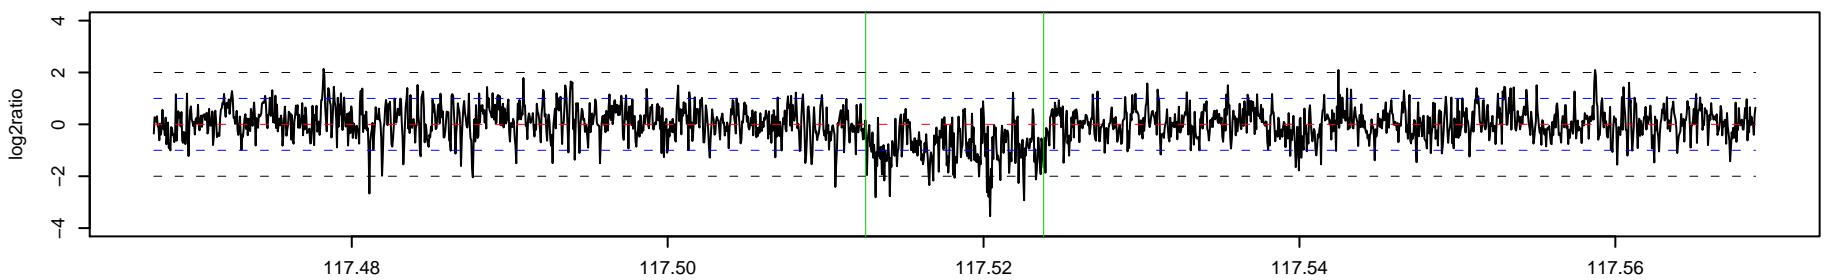

427 \_ AK1 Chr 10 : 124335130 – 124348054 , 12925 bp (aCGH relative log2ratio= 0.55 )

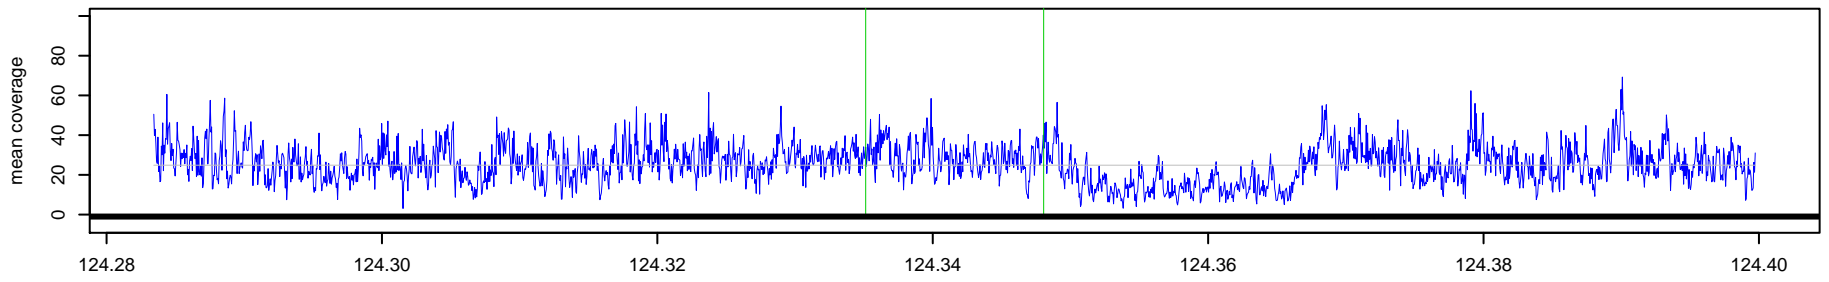

427 \_ NA10851 Chr 10 : 124335130 – 124348054 , 12925 bp (aCGH relative log2ratio= 0.55 )

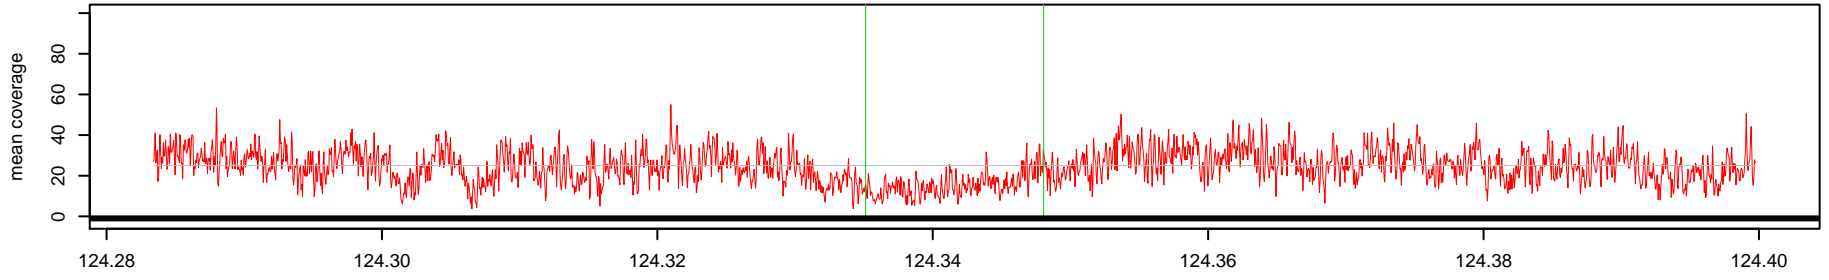

Log2( AK1 read depth / NA10851 read depth)

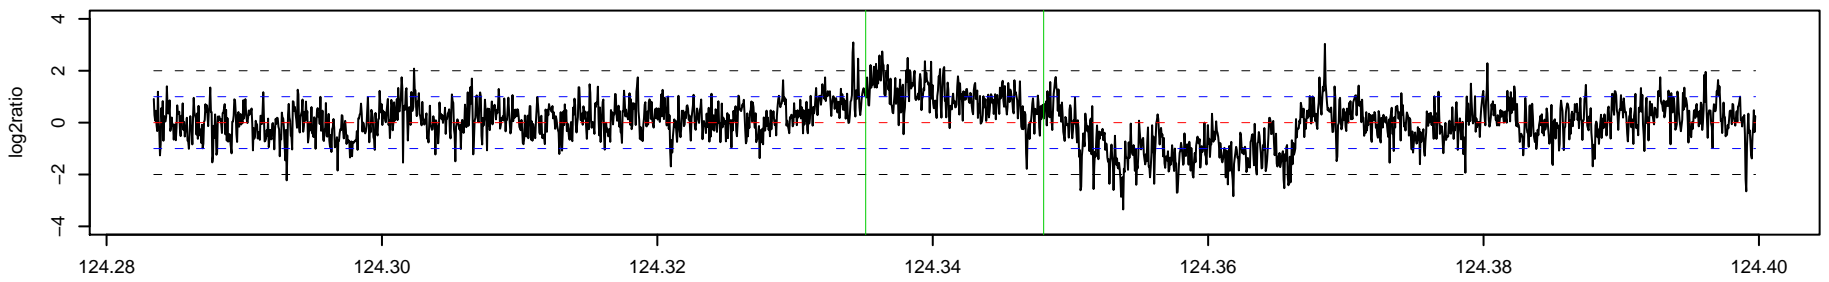

428 \_ AK1 Chr 10 : 127490206 – 127490705 , 500 bp (aCGH relative log2ratio= 0.73 )

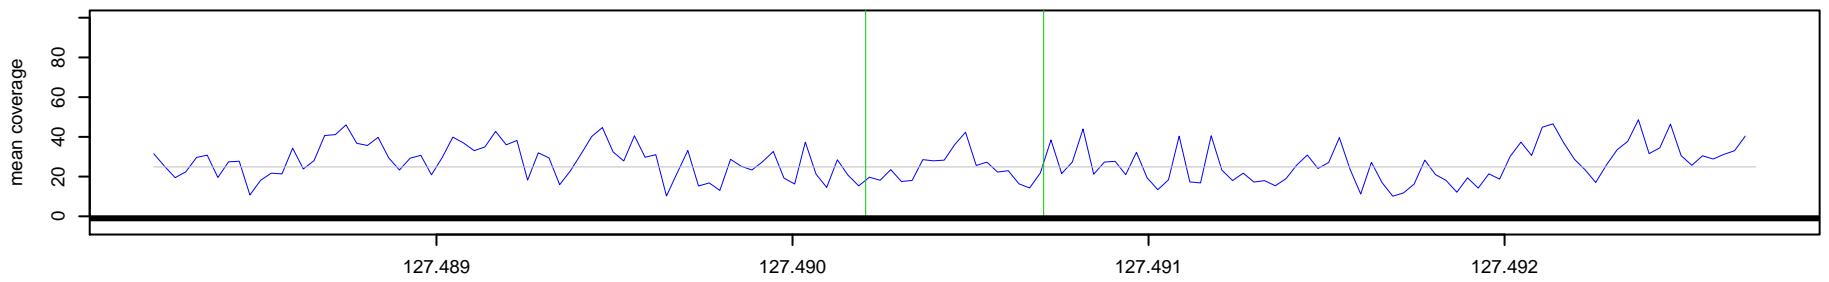

428 \_ NA10851 Chr 10 : 127490206 – 127490705 , 500 bp (aCGH relative log2ratio= 0.73 )

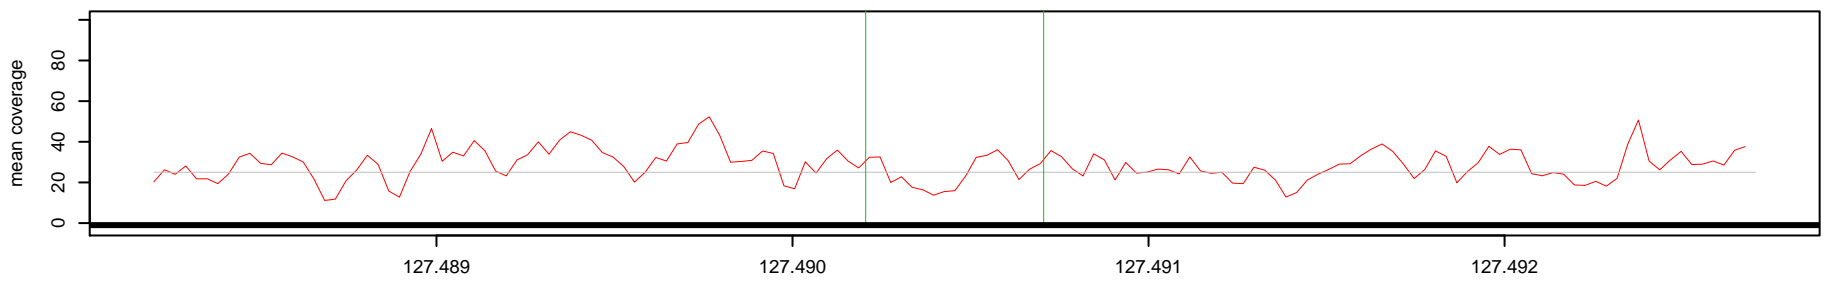

Log2( AK1 read depth / NA10851 read depth)

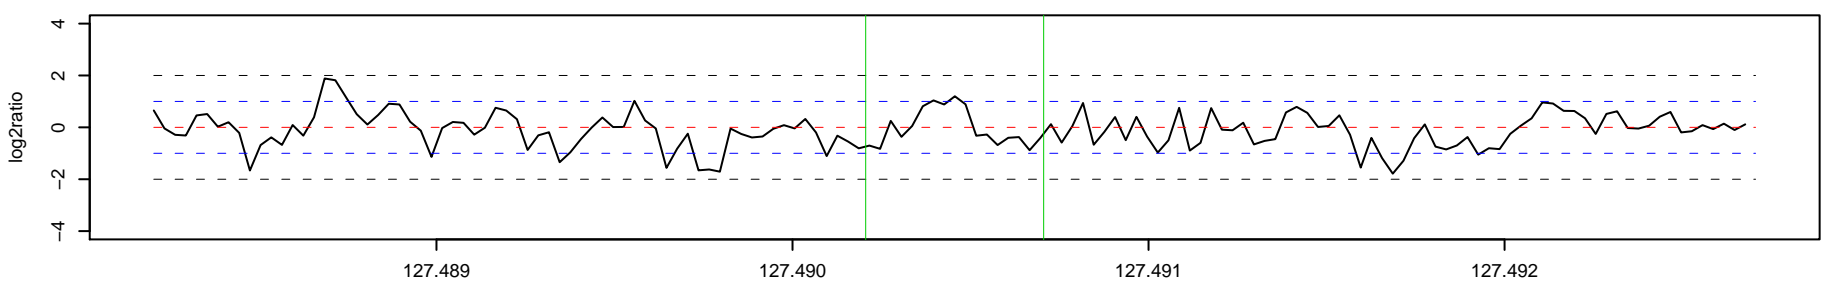

429\_AK1 Chr 10 : 132526248 – 132528234 , 1987 bp (aCGH relative log2ratio= 0.68 )

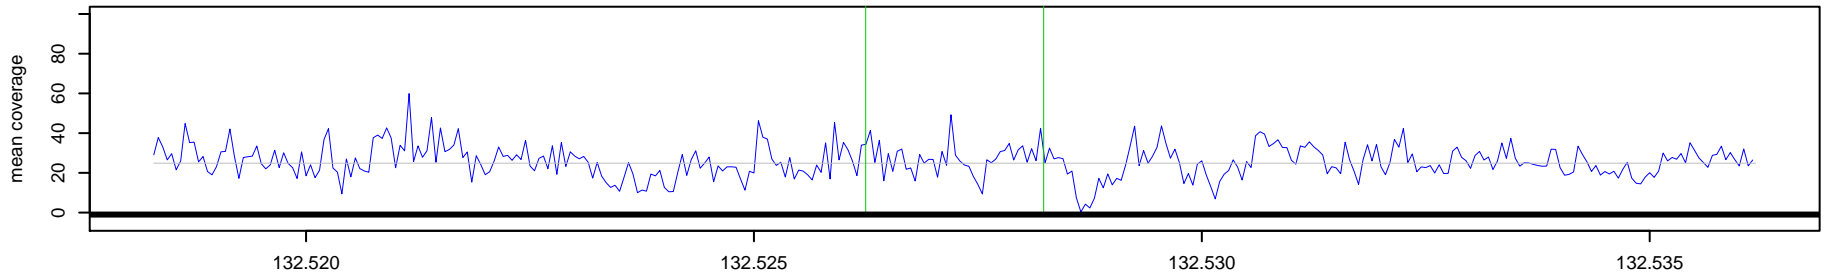

429\_NA10851 Chr 10 : 132526248 – 132528234 , 1987 bp (aCGH relative log2ratio= 0.68 )

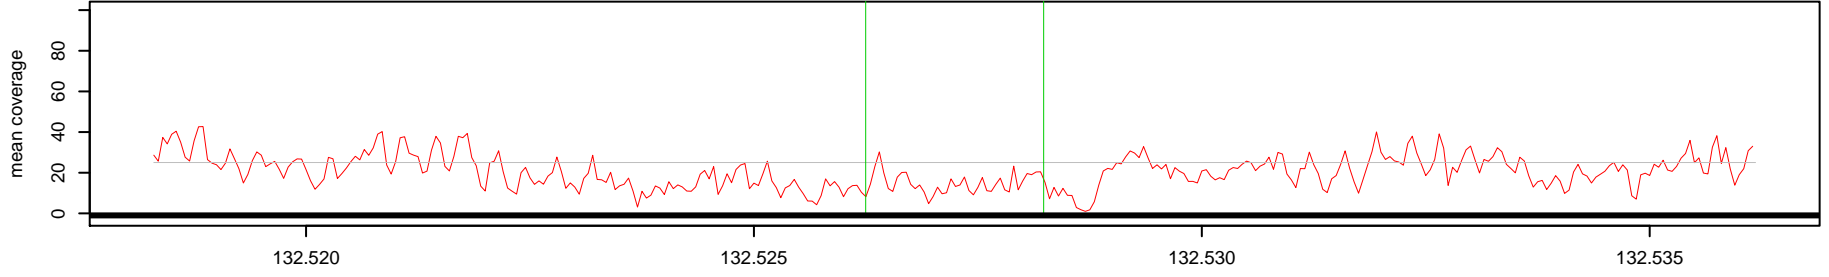

Log2( AK1 read depth / NA10851 read depth)

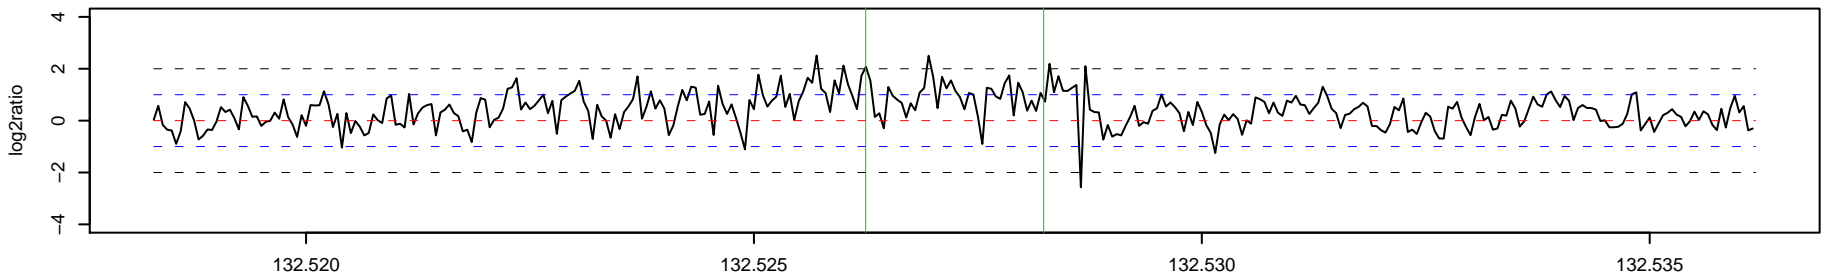

430\_AK1 Chr 10 : 132799056 – 132802764 , 3709 bp (aCGH relative log2ratio= -1.48 )

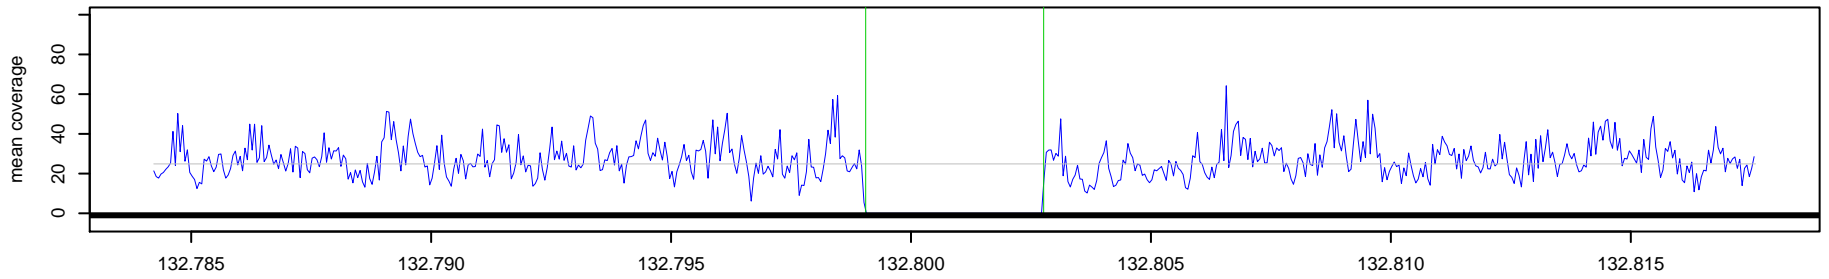

430\_NA10851 Chr 10 : 132799056 – 132802764 , 3709 bp (aCGH relative log2ratio= -1.48 )

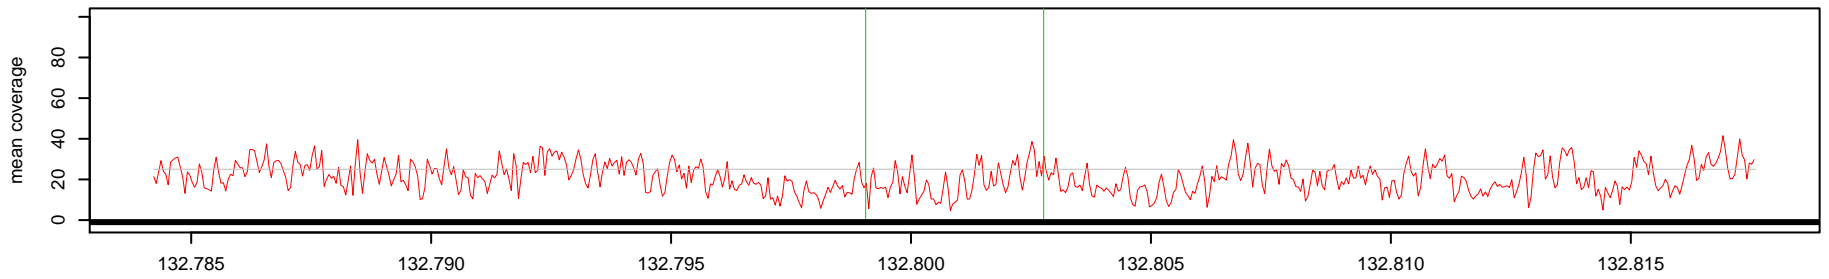

Log2( AK1 read depth / NA10851 read depth)

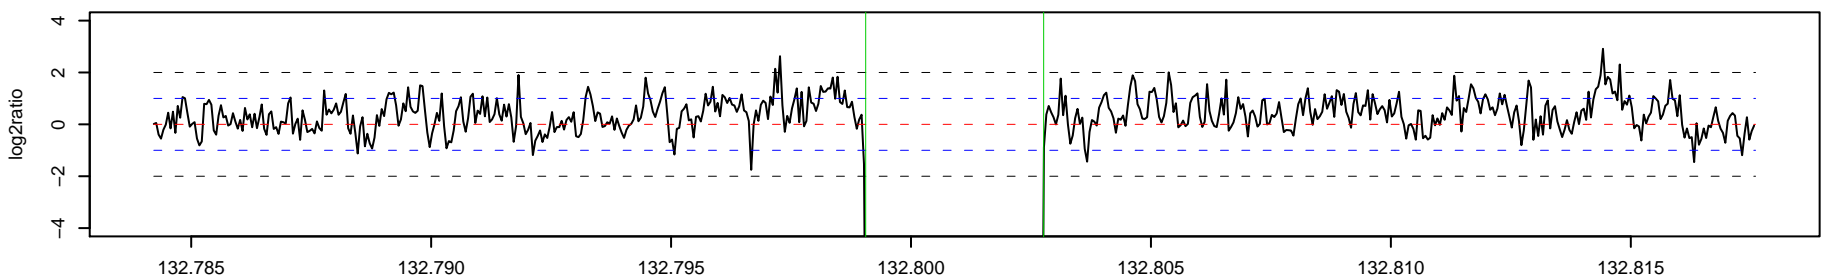

431\_AK1 Chr 11 : 4925123 - 4932629 , 7507 bp (aCGH relative log2ratio= -0.98 )

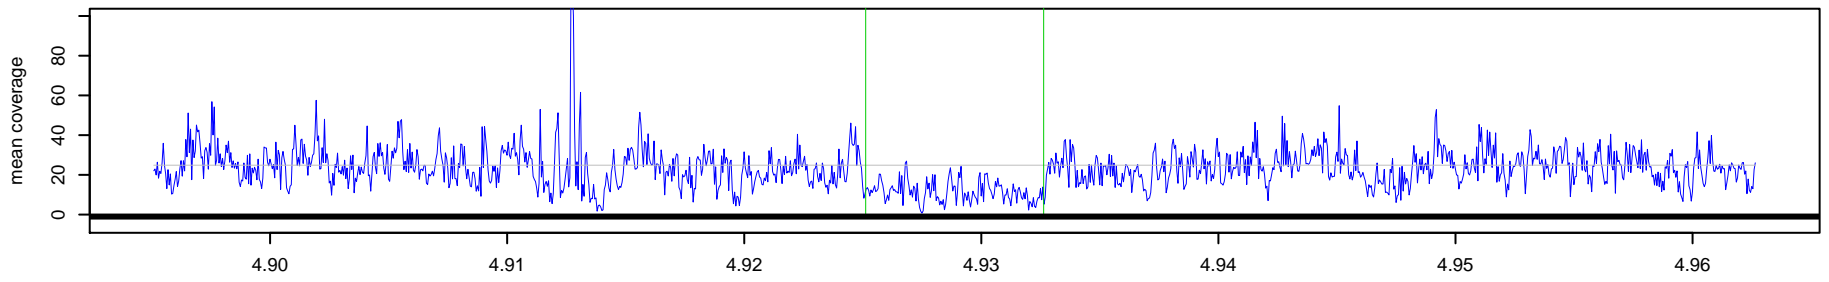

431\_NA10851 Chr 11 : 4925123 - 4932629 , 7507 bp (aCGH relative log2ratio= -0.98 )

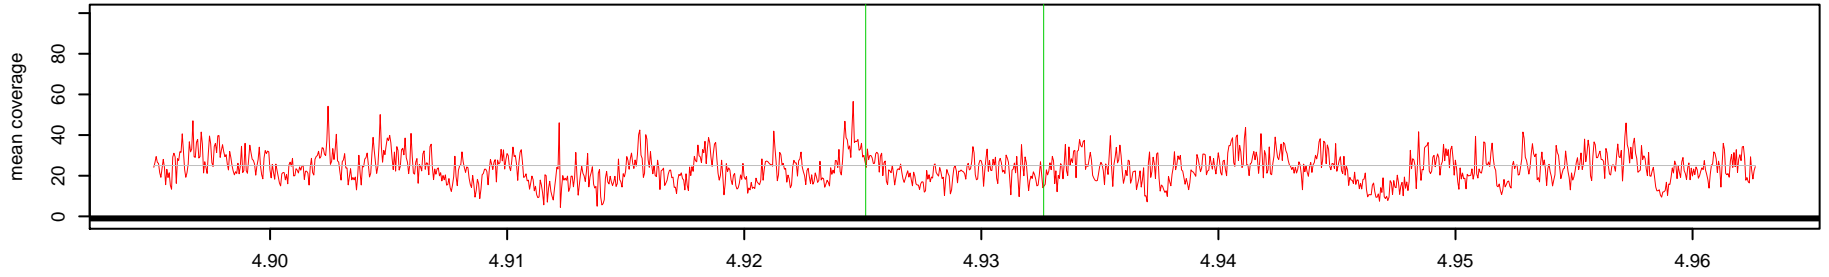

Log2( AK1 read depth / NA10851 read depth)

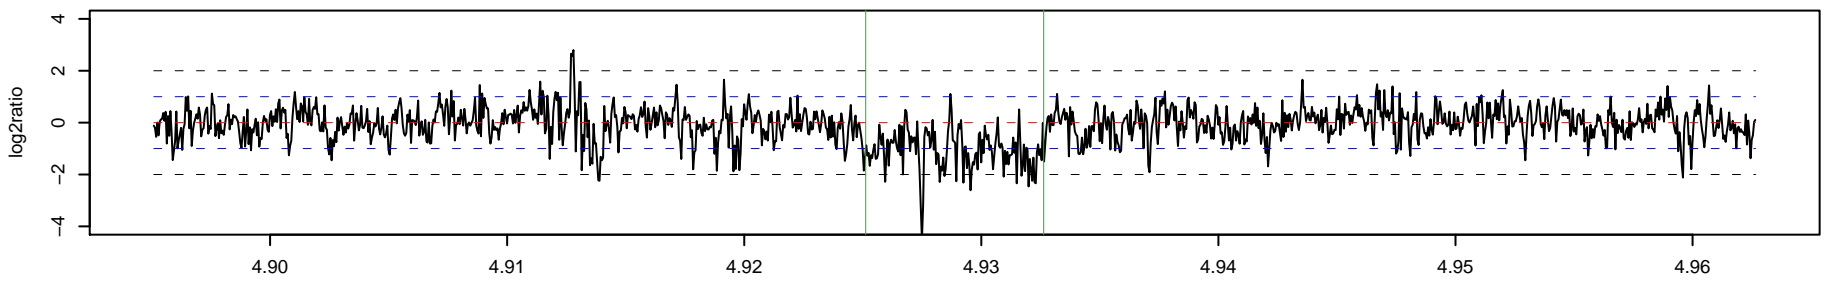

432\_AK1 Chr 11 : 5593947 - 5595329 , 1383 bp (aCGH relative log2ratio= -4.87 )

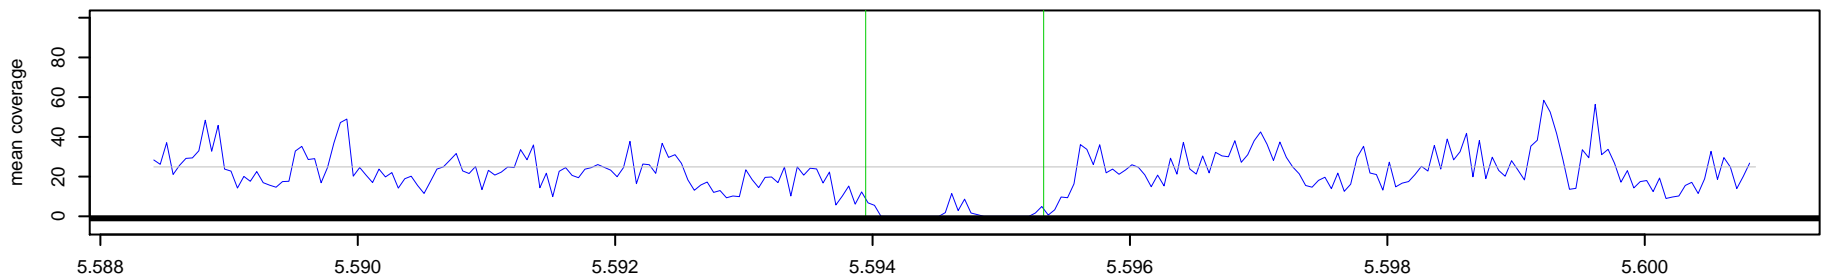

432\_NA10851 Chr 11 : 5593947 - 5595329 , 1383 bp (aCGH relative log2ratio= -4.87 )

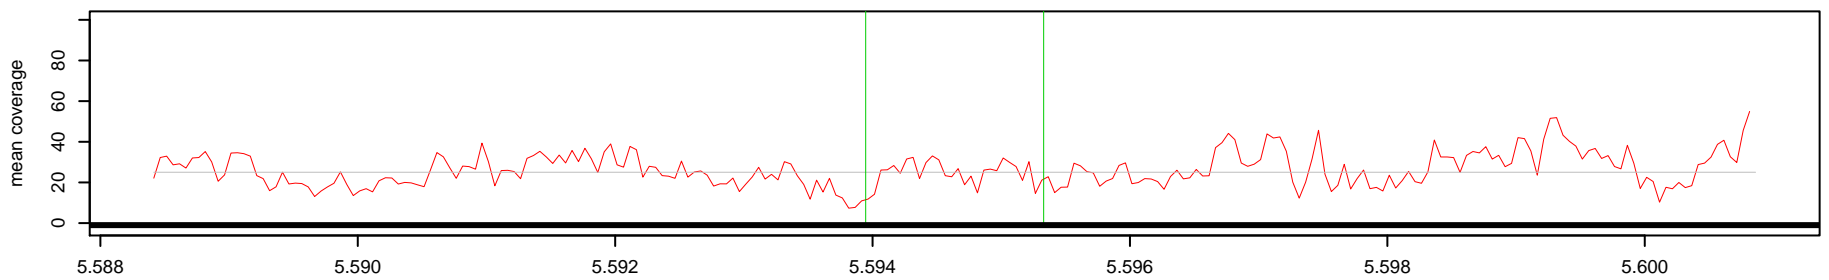

Log2( AK1 read depth / NA10851 read depth)

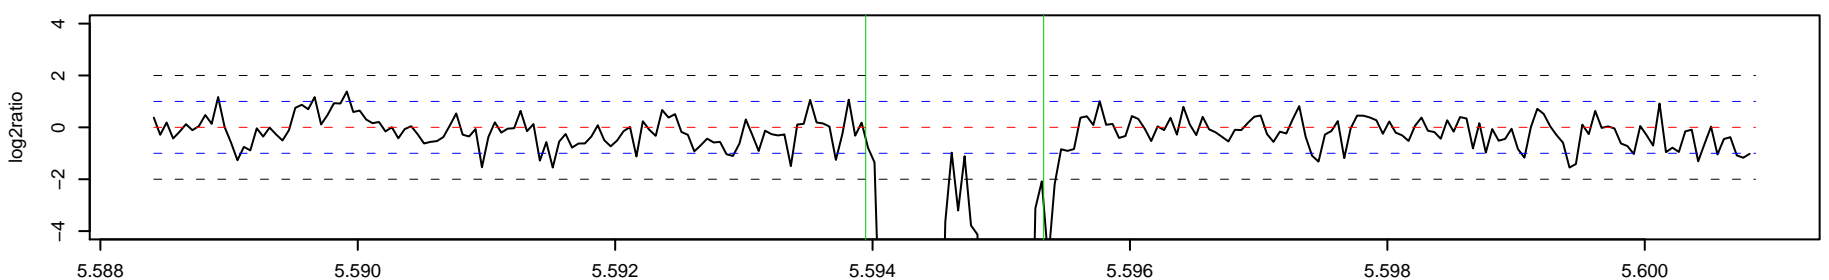

433\_AK1 Chr 11 : 5716668 - 5719117 , 2450 bp (aCGH relative log2ratio= 2.53 )

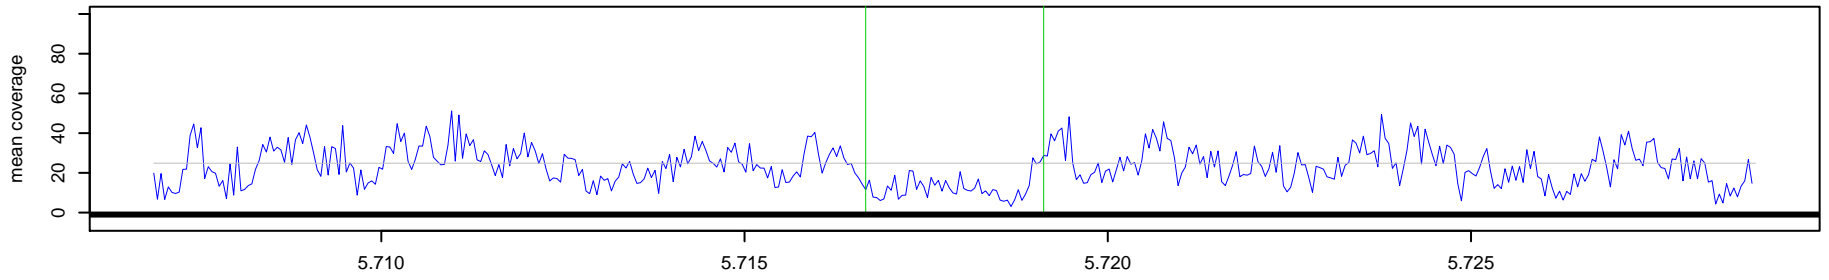

433\_NA10851 Chr 11 : 5716668 - 5719117 , 2450 bp (aCGH relative log2ratio= 2.53 )

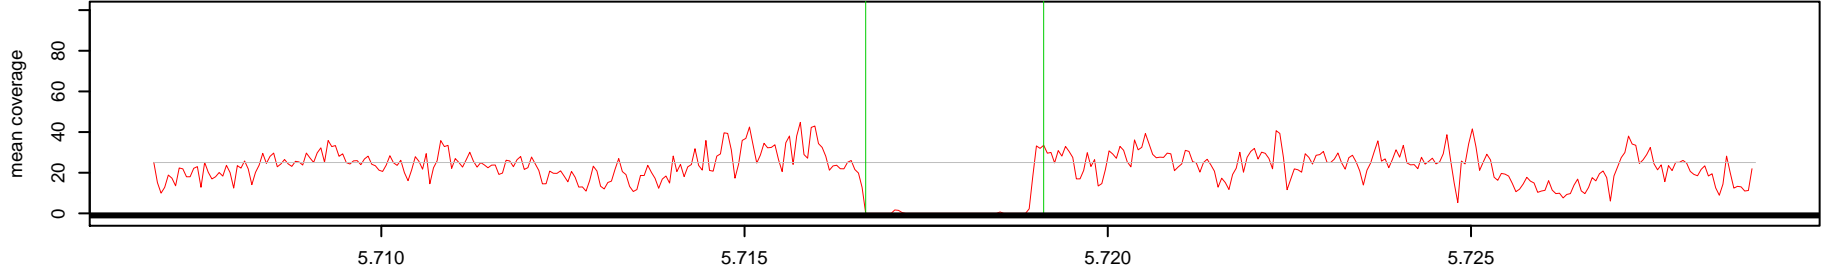

Log2( AK1 read depth / NA10851 read depth)

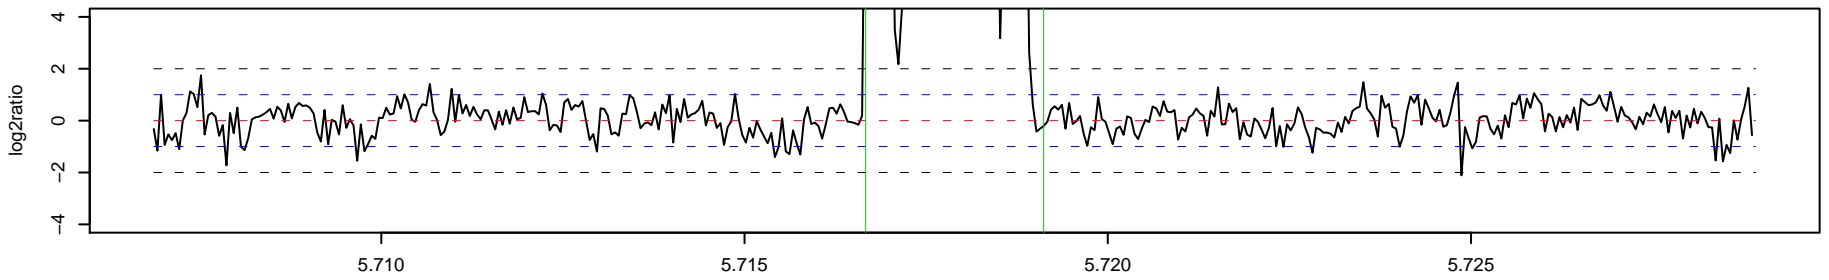

434\_AK1 Chr 11 : 5741252 - 5765839 , 24588 bp (aCGH relative log2ratio= 2.91 )

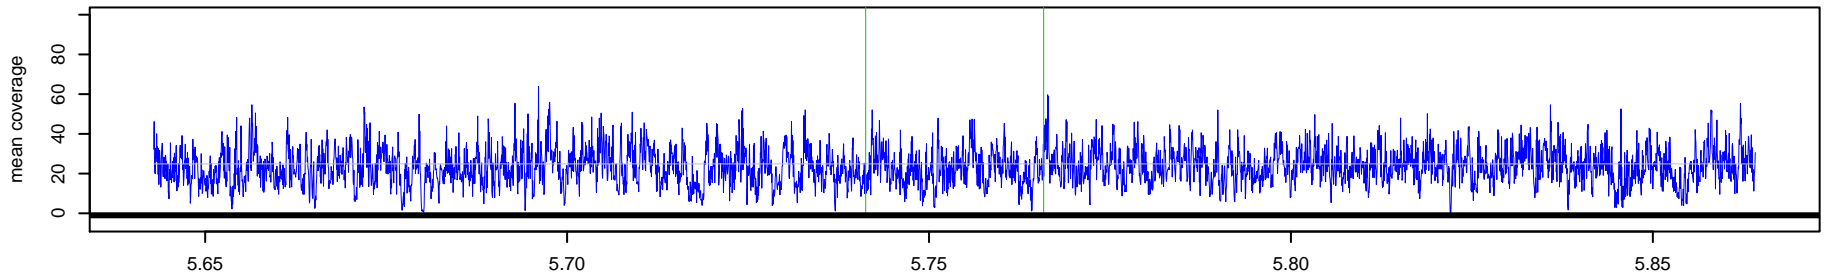

434\_NA10851 Chr 11 : 5741252 - 5765839 , 24588 bp (aCGH relative log2ratio= 2.91 )

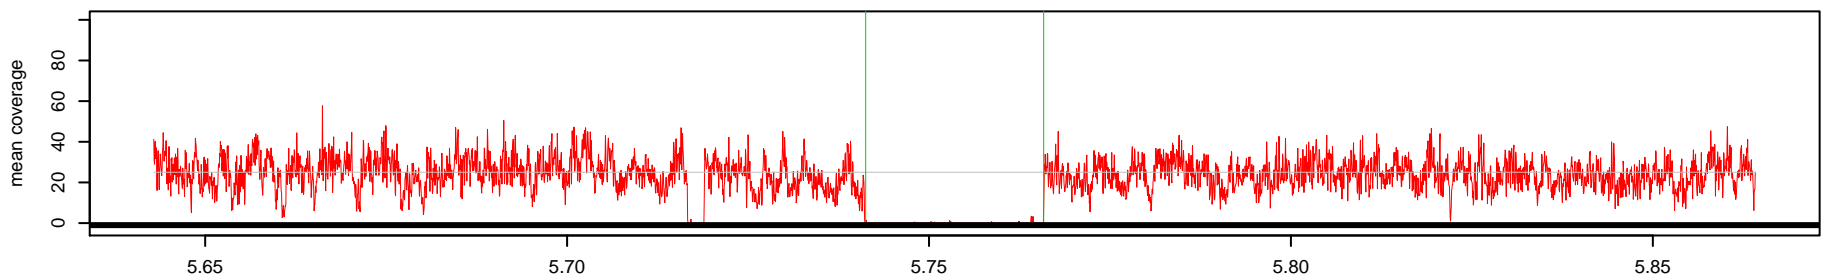

Log2( AK1 read depth / NA10851 read depth)

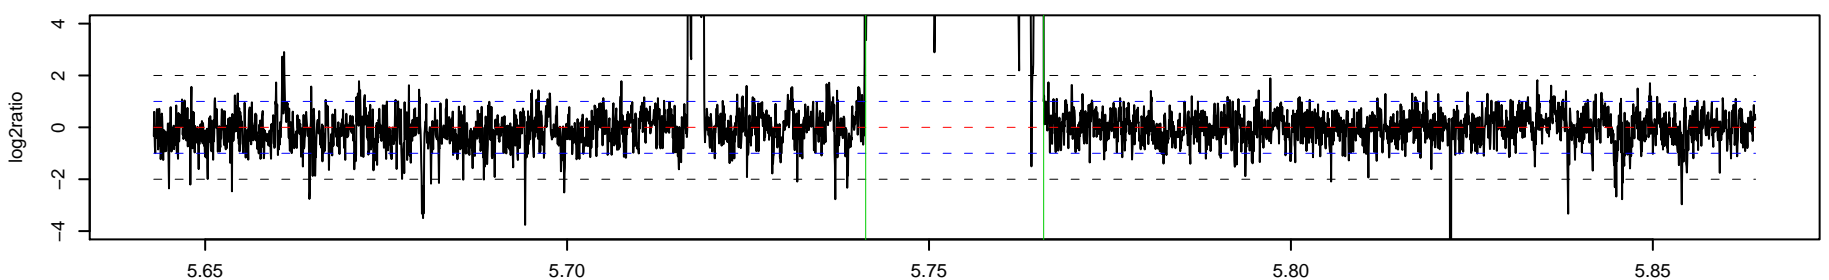

435\_AK1 Chr 11 : 7091121 - 7093053 , 1933 bp (aCGH relative log2ratio= 0.73 )

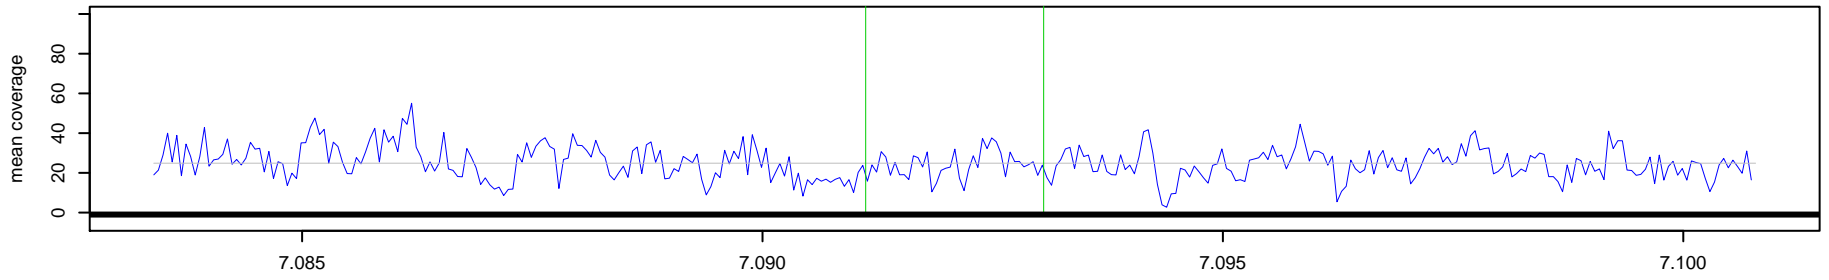

435\_NA10851 Chr 11 : 7091121 - 7093053 , 1933 bp (aCGH relative log2ratio= 0.73 )

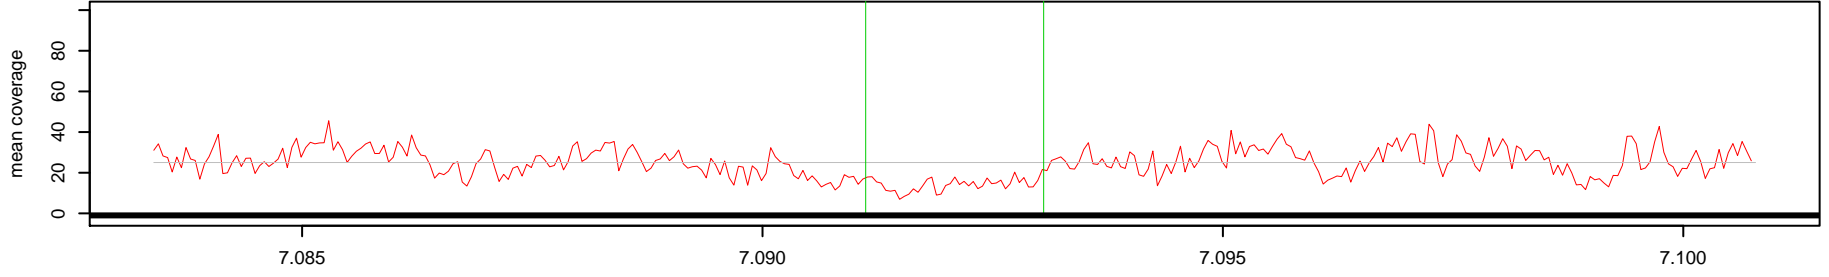

Log2( AK1 read depth / NA10851 read depth)

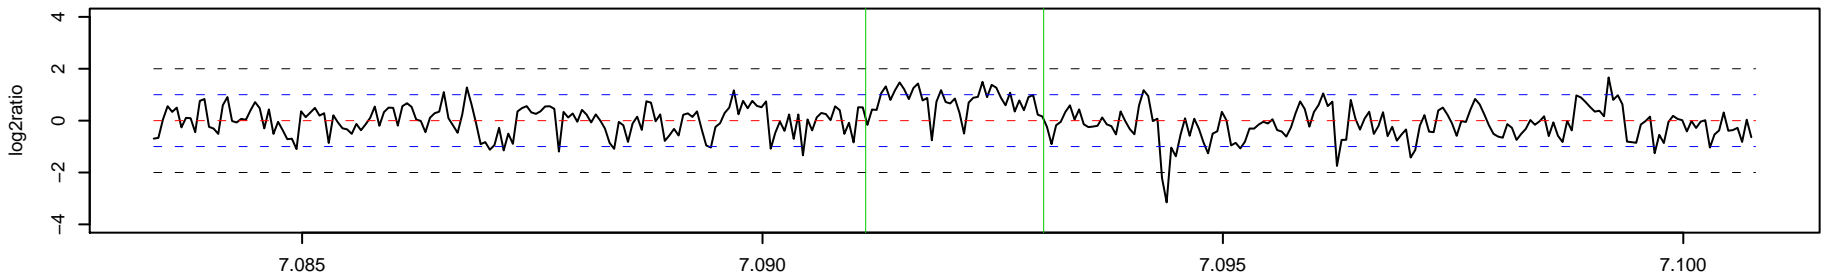

436\_AK1 Chr 11 : 18897472 - 18917533 , 20062 bp (aCGH relative log2ratio= 0.55 )

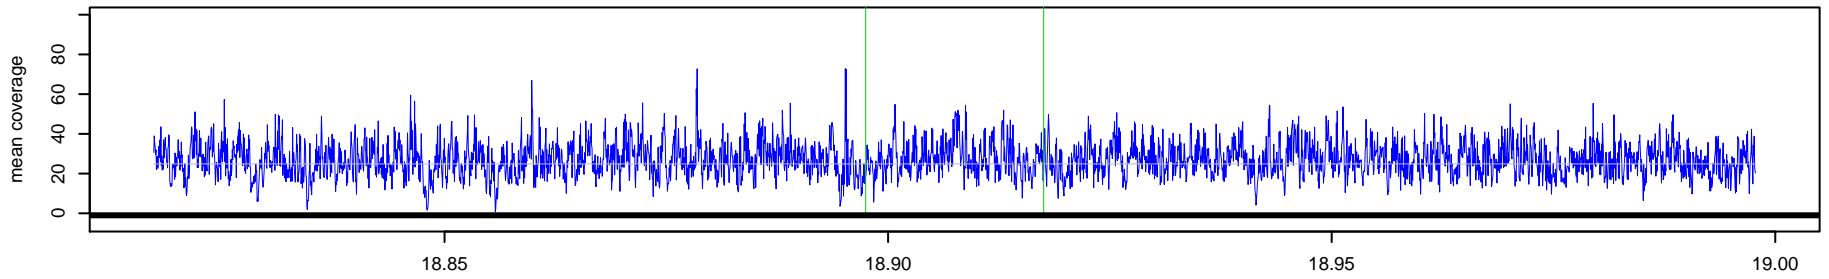

436\_NA10851 Chr 11 : 18897472 - 18917533 , 20062 bp (aCGH relative log2ratio= 0.55 )

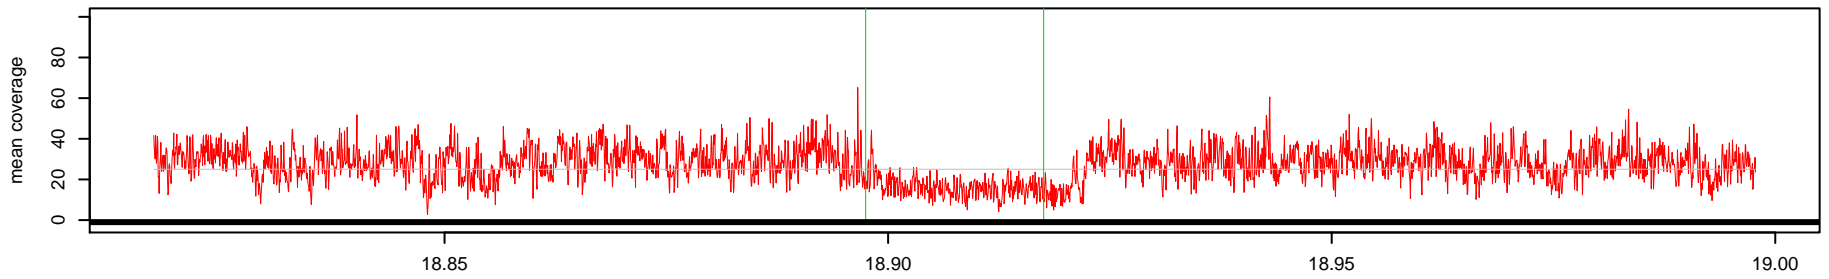

Log2( AK1 read depth / NA10851 read depth)

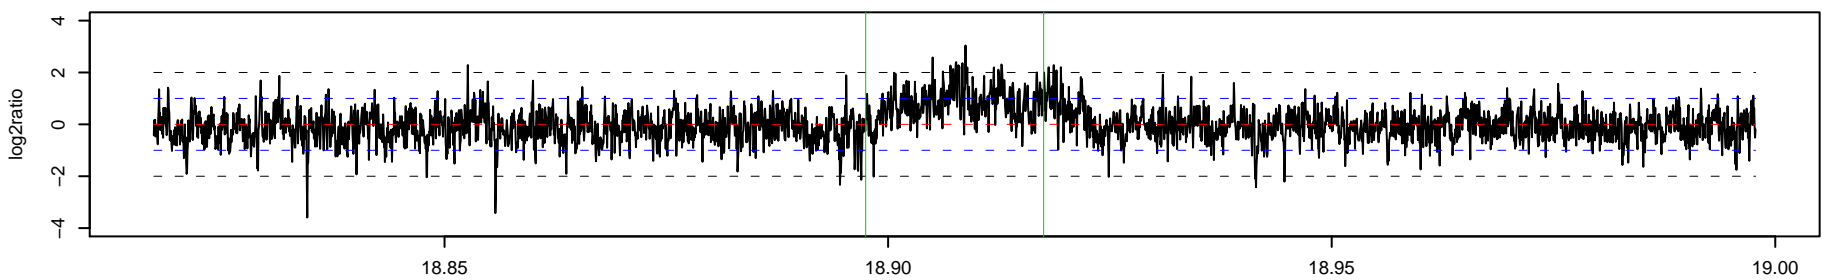

437 \_ AK1 Chr 11 : 24399704 – 24408825 , 9122 bp (aCGH relative log2ratio= 1.01 )

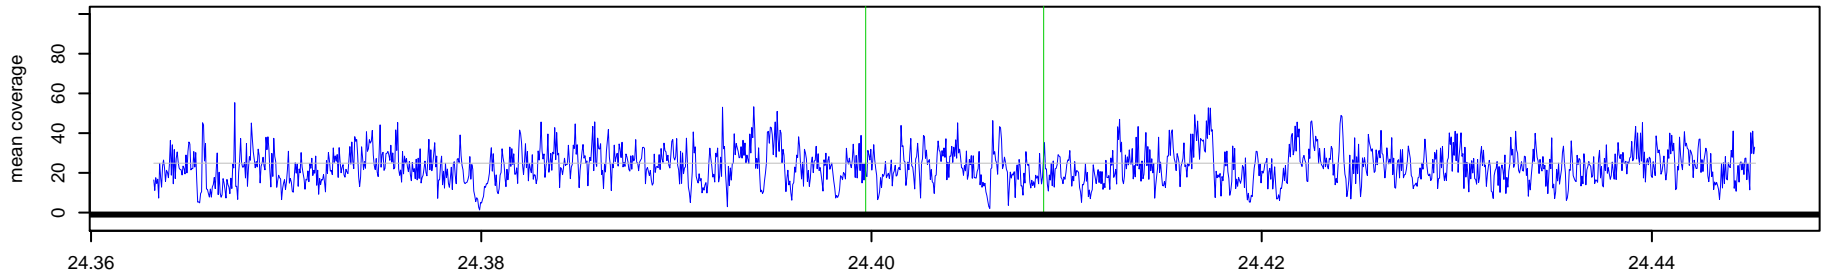

437 \_ NA10851 Chr 11 : 24399704 – 24408825 , 9122 bp (aCGH relative log2ratio= 1.01 )

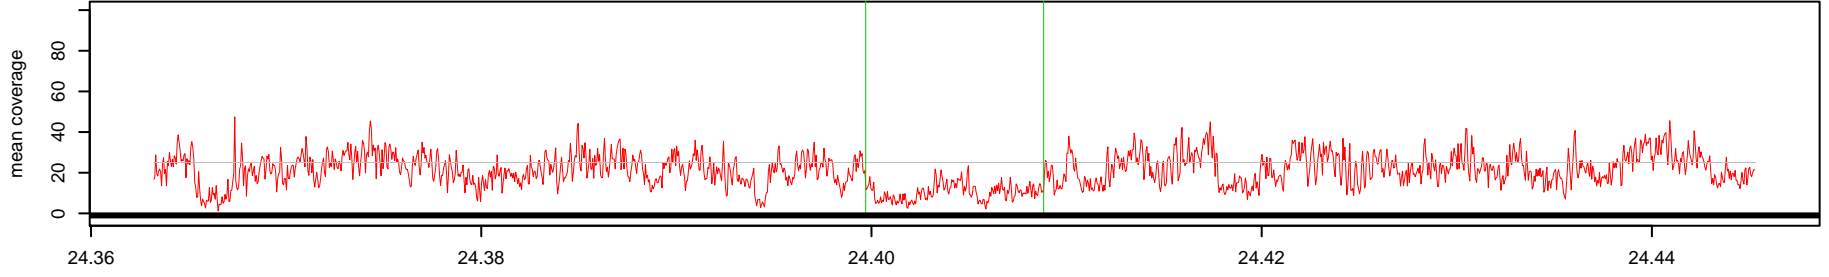

Log2( AK1 read depth / NA10851 read depth)

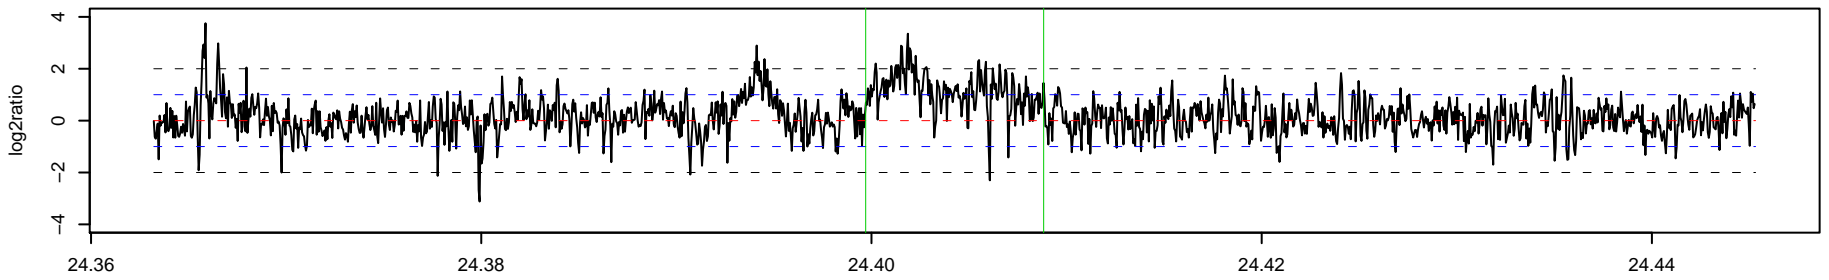

438 \_ AK1 Chr 11 : 24640609 – 24641684 , 1076 bp (aCGH relative log2ratio= 0.52 )

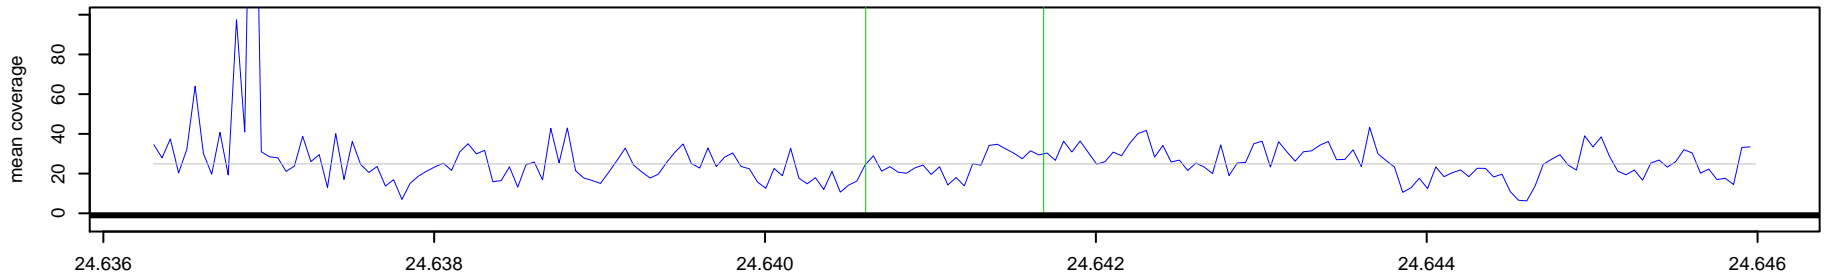

438 \_ NA10851 Chr 11 : 24640609 – 24641684 , 1076 bp (aCGH relative log2ratio= 0.52 )

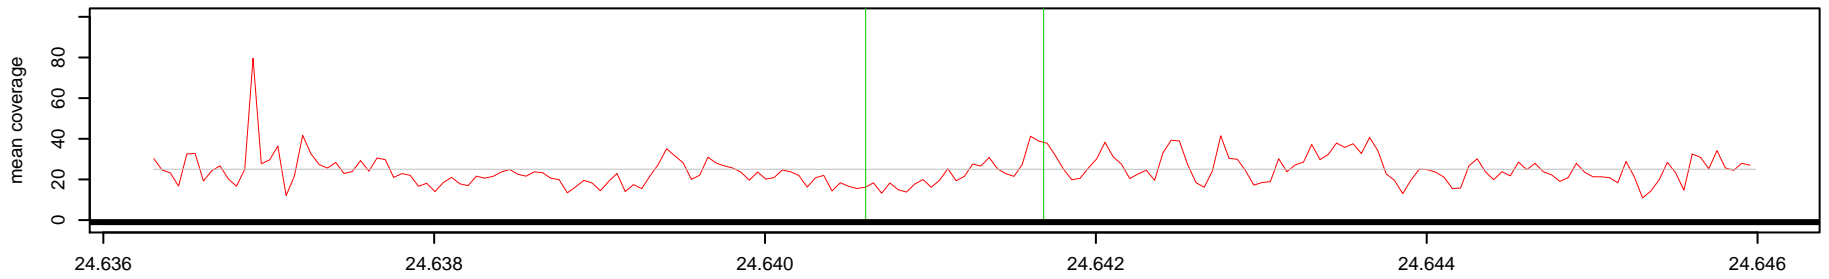

Log2( AK1 read depth / NA10851 read depth)

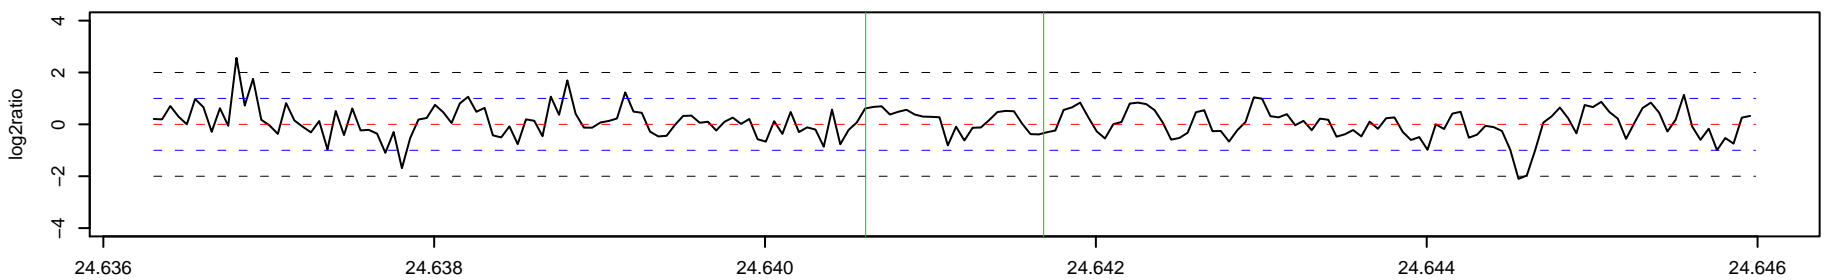

439\_AK1 Chr 11 : 28964490 – 28969274 , 4785 bp (aCGH relative log2ratio= 4.22 )

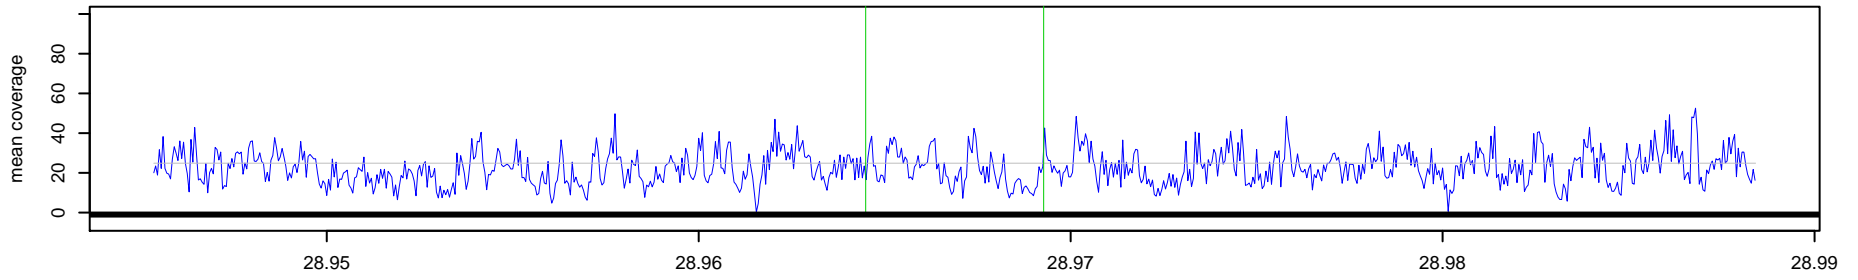

439\_NA10851 Chr 11 : 28964490 – 28969274 , 4785 bp (aCGH relative log2ratio= 4.22 )

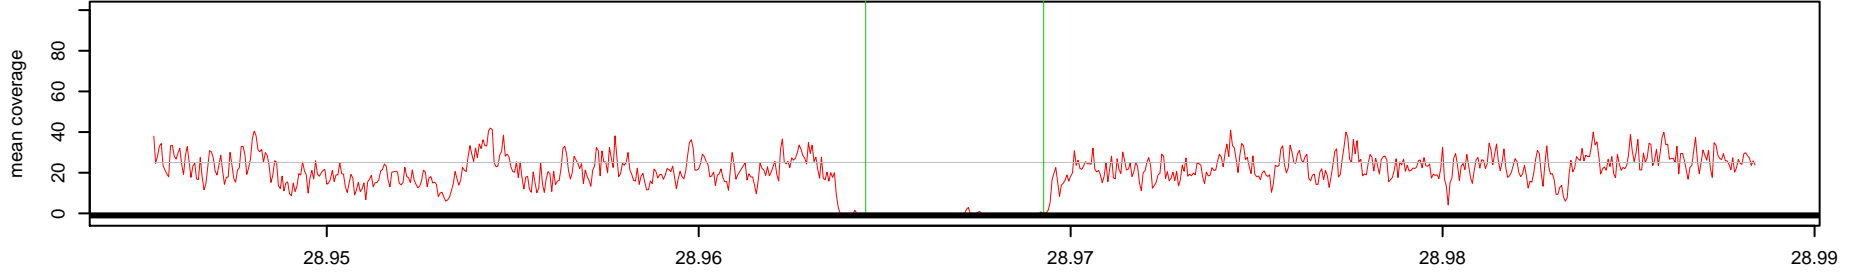

Log2( AK1 read depth / NA10851 read depth)

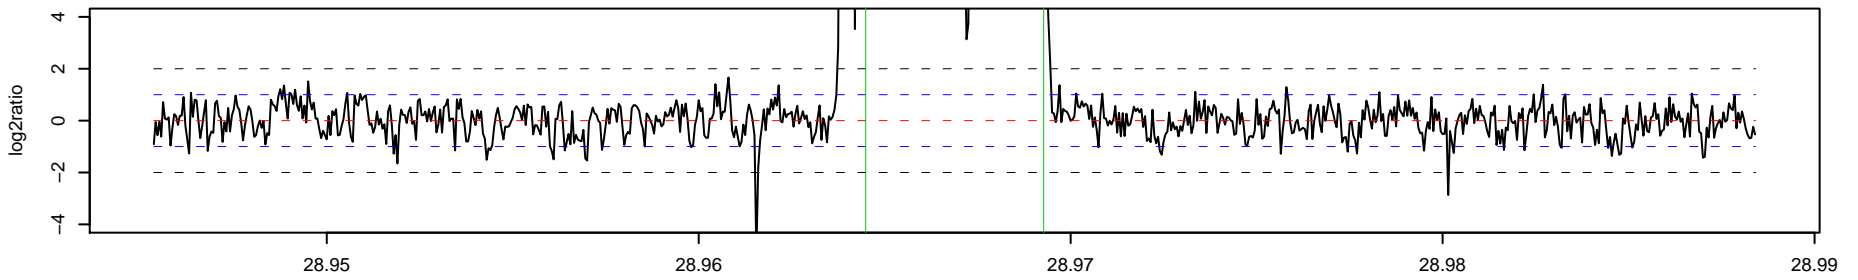

440\_AK1 Chr 11 : 29924125 – 29925052 , 928 bp (aCGH relative log2ratio= -0.70 )

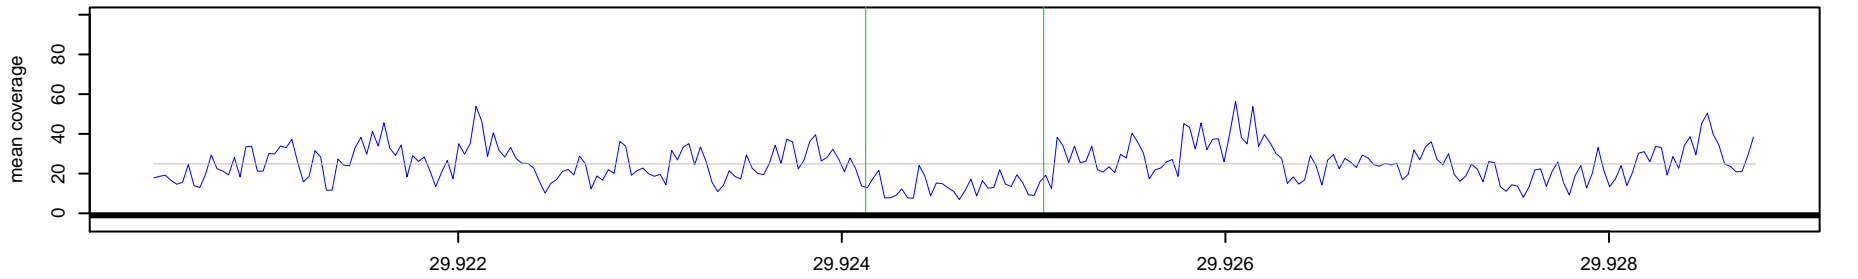

440\_NA10851 Chr 11 : 29924125 – 29925052 , 928 bp (aCGH relative log2ratio= -0.70 )

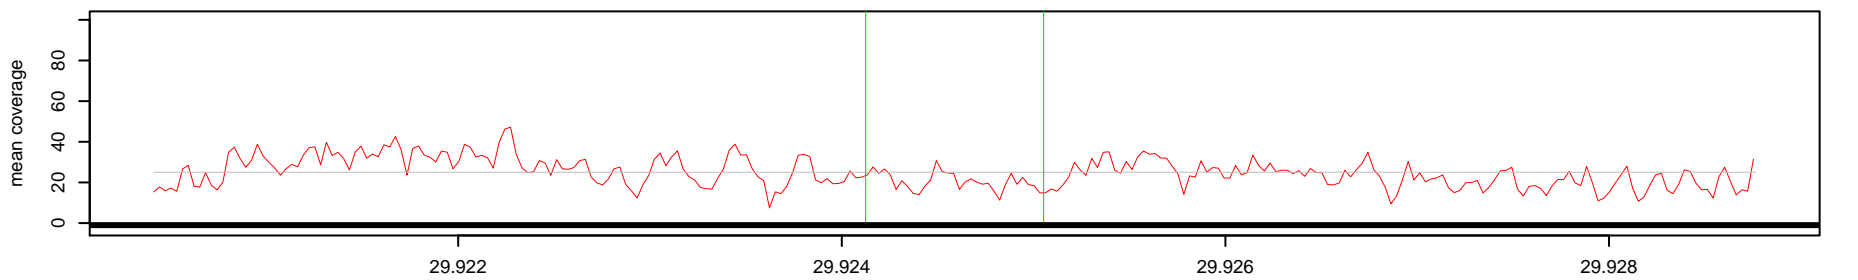

Log2( AK1 read depth / NA10851 read depth)

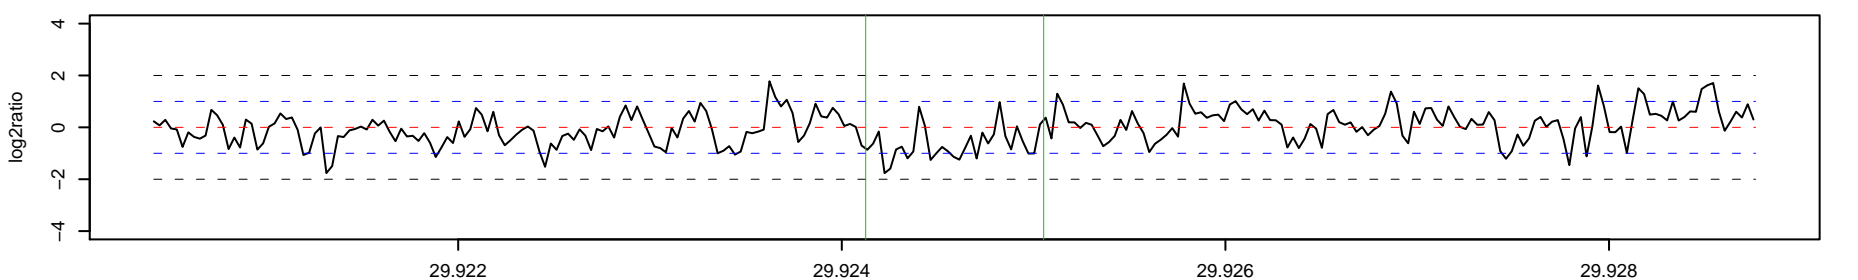



441 \_ AK1 Chr 11 : 31350263 – 31353733 , 3471 bp (aCGH relative log2ratio= 0.75 )

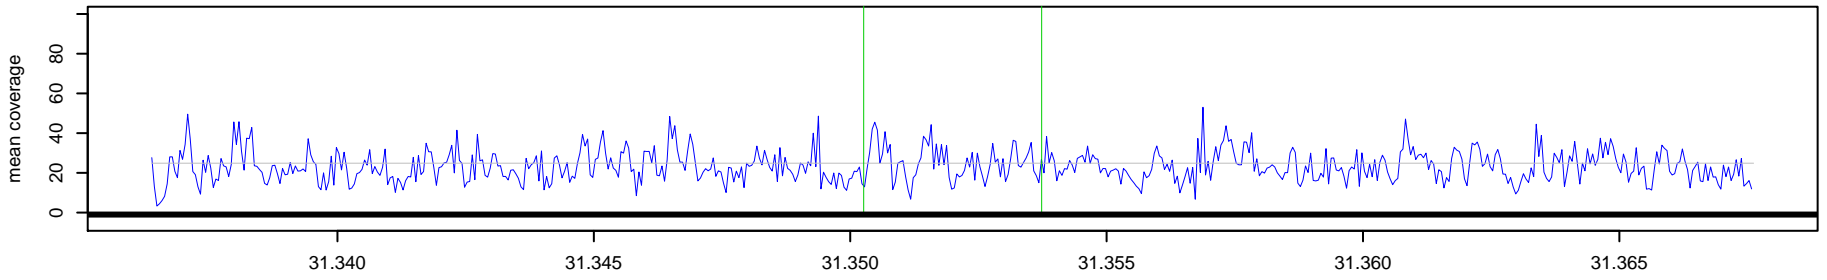

441 \_ NA10851 Chr 11 : 31350263 – 31353733 , 3471 bp (aCGH relative log2ratio= 0.75 )

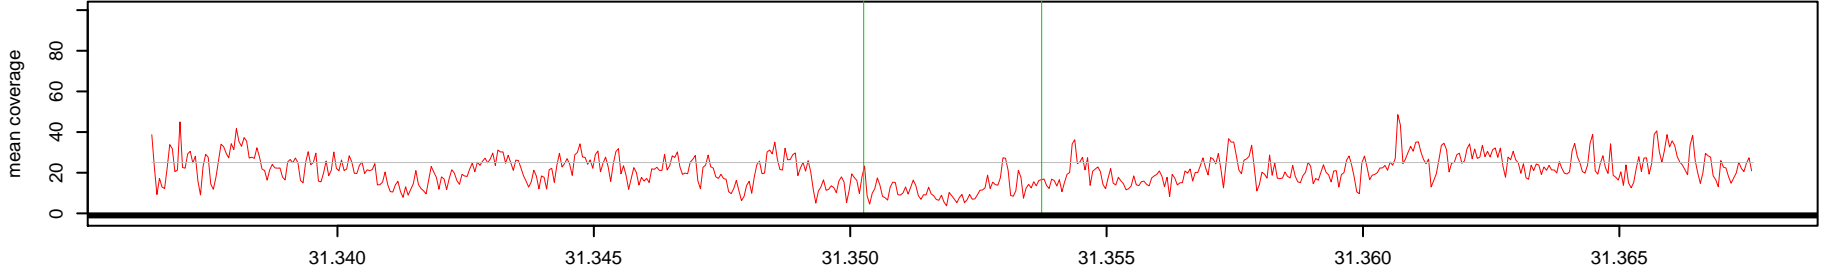

Log2( AK1 read depth / NA10851 read depth)

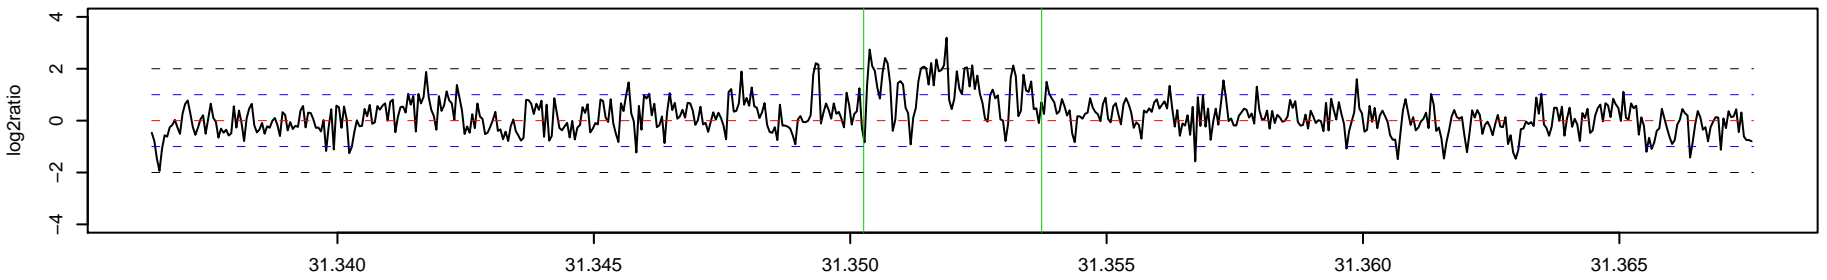

442 \_ AK1 Chr 11 : 34128684 – 34130660 , 1977 bp (aCGH relative log2ratio= -0.53 )

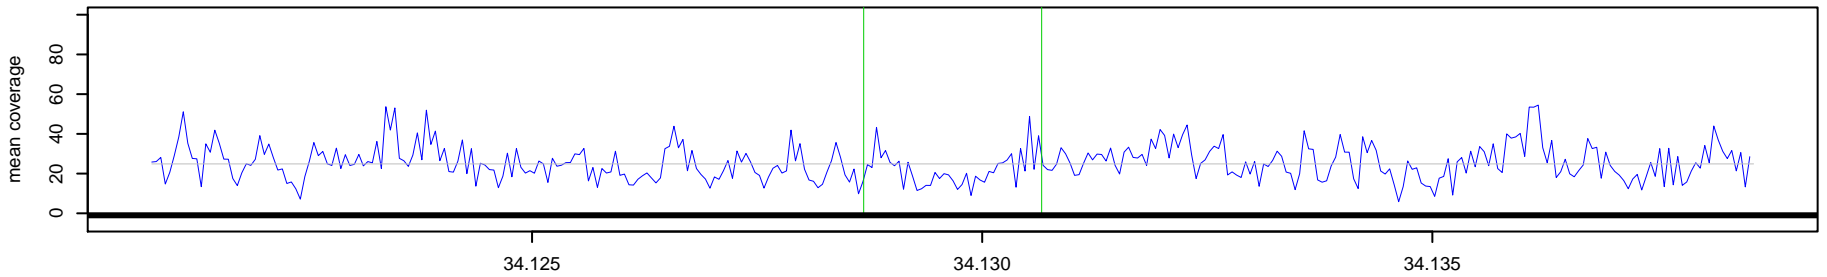

442 \_ NA10851 Chr 11 : 34128684 – 34130660 , 1977 bp (aCGH relative log2ratio= -0.53 )

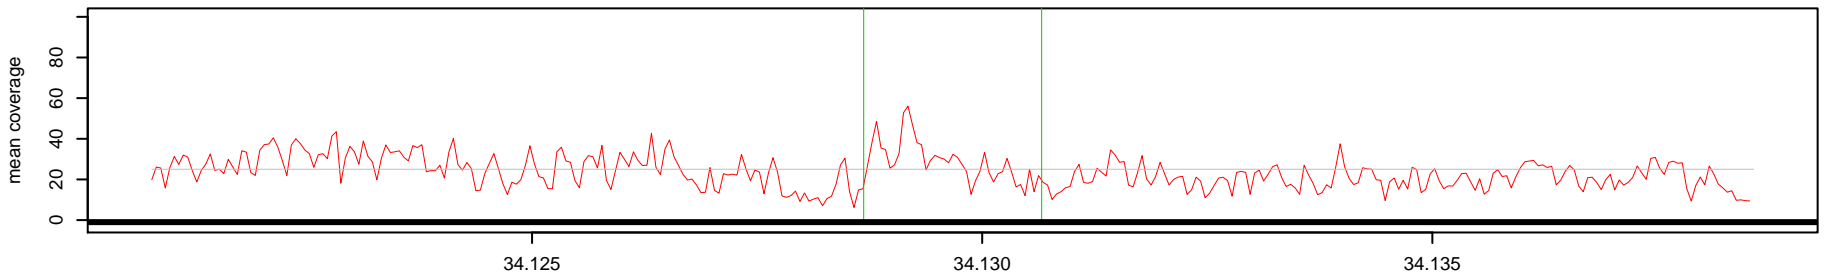

Log2( AK1 read depth / NA10851 read depth)

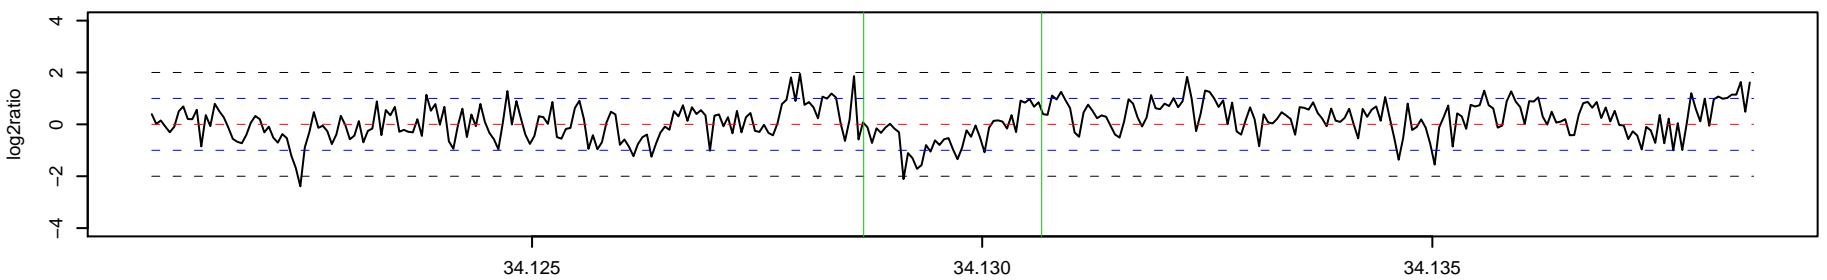

443\_AK1 Chr 11 : 35018203 – 35159470 , 141268 bp (aCGH relative log2ratio= -0.23 )

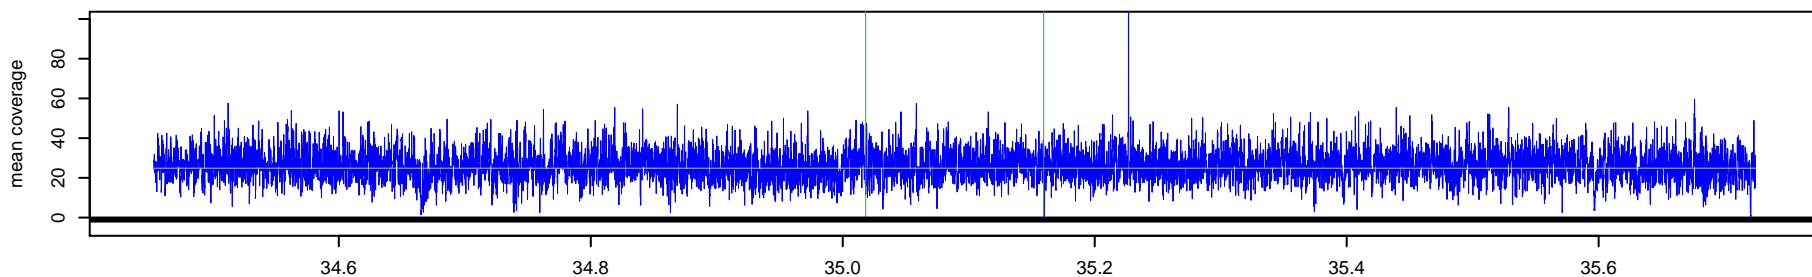

443\_NA10851 Chr 11 : 35018203 – 35159470 , 141268 bp (aCGH relative log2ratio= -0.23 )

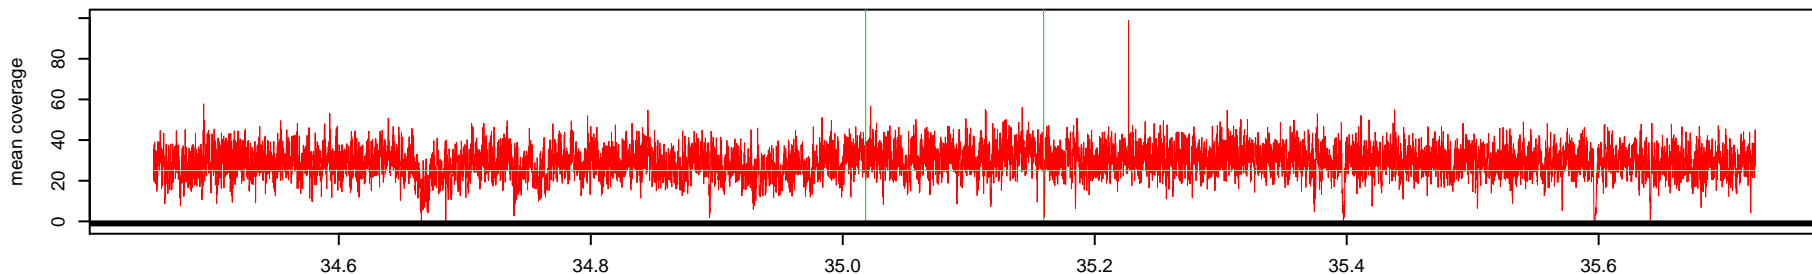

Log2( AK1 read depth / NA10851 read depth)

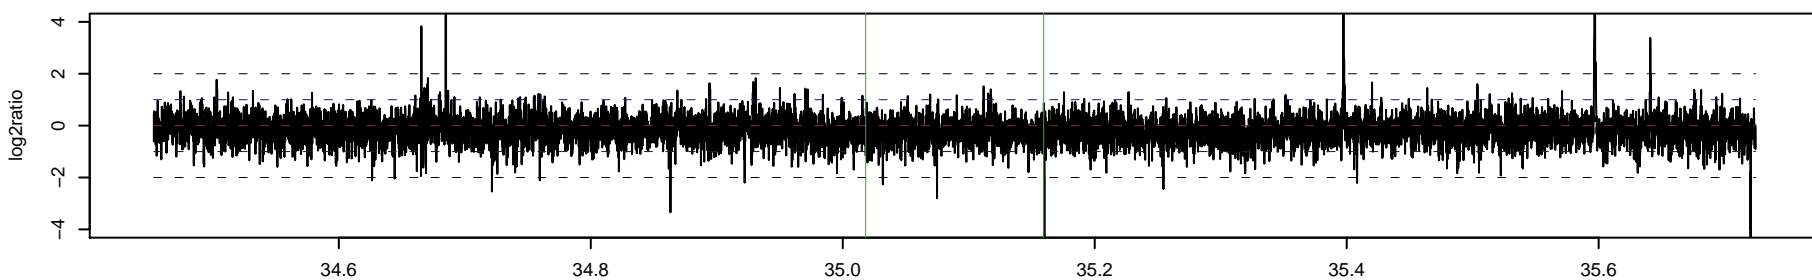

o

o

444\_AK1 Chr 11 : 38257085 – 38257676 , 592 bp (aCGH relative log2ratio= 1.08 )

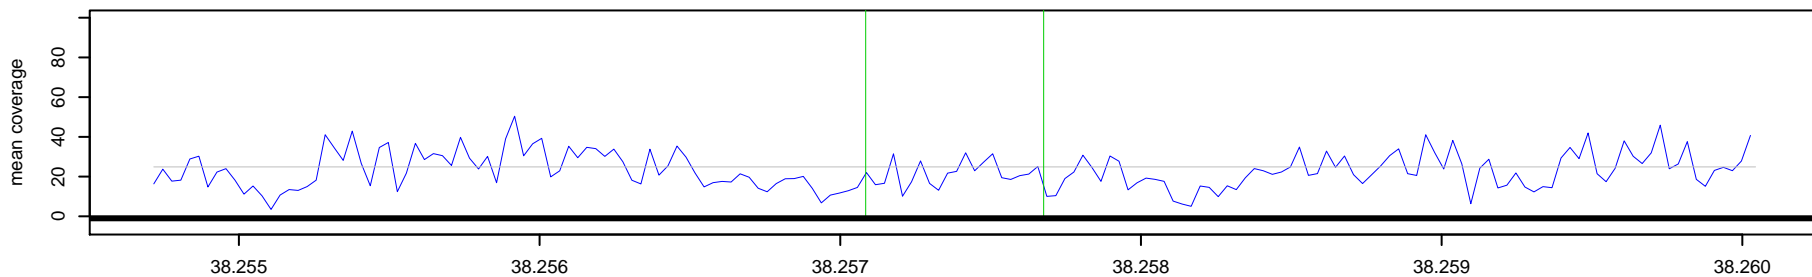

444\_NA10851 Chr 11 : 38257085 – 38257676 , 592 bp (aCGH relative log2ratio= 1.08 )

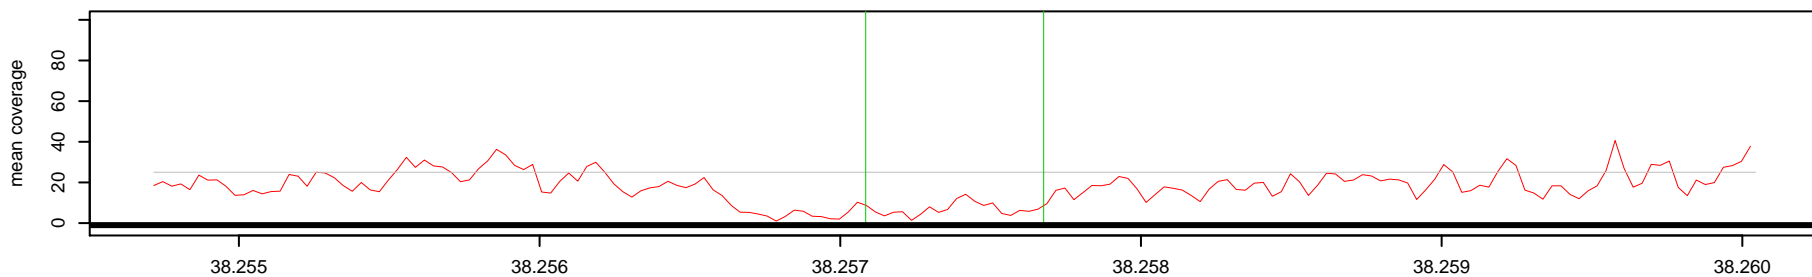

Log2( AK1 read depth / NA10851 read depth)

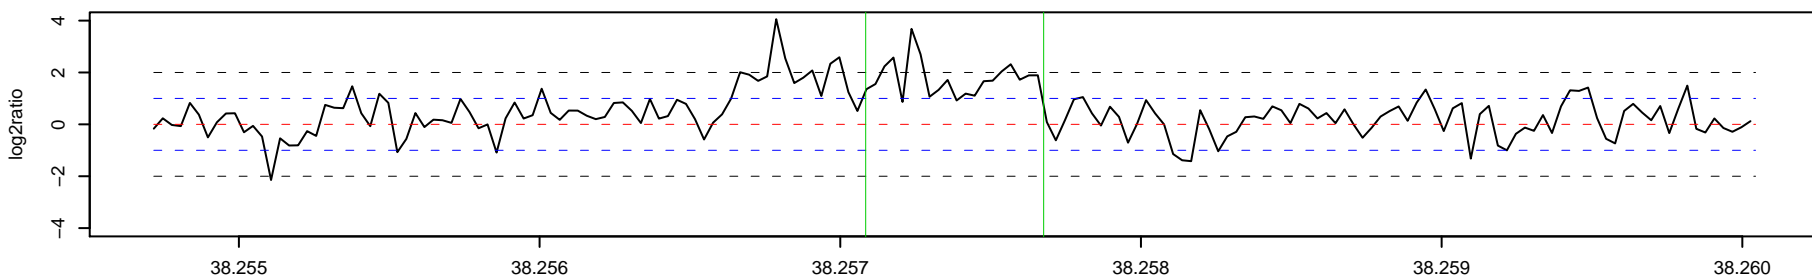

445\_AK1 Chr 11 : 41774591 – 41775544 , 954 bp (aCGH relative log2ratio= -1.00 )

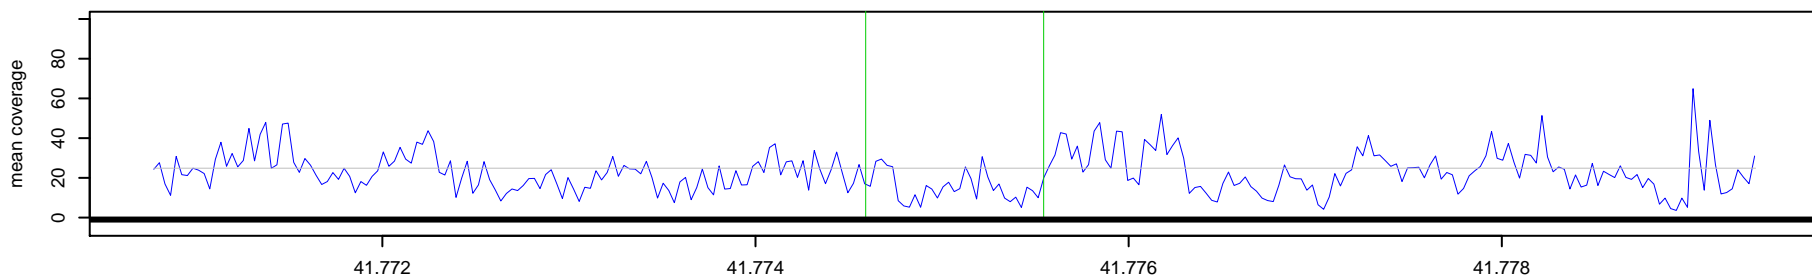

445\_NA10851 Chr 11 : 41774591 – 41775544 , 954 bp (aCGH relative log2ratio= -1.00 )

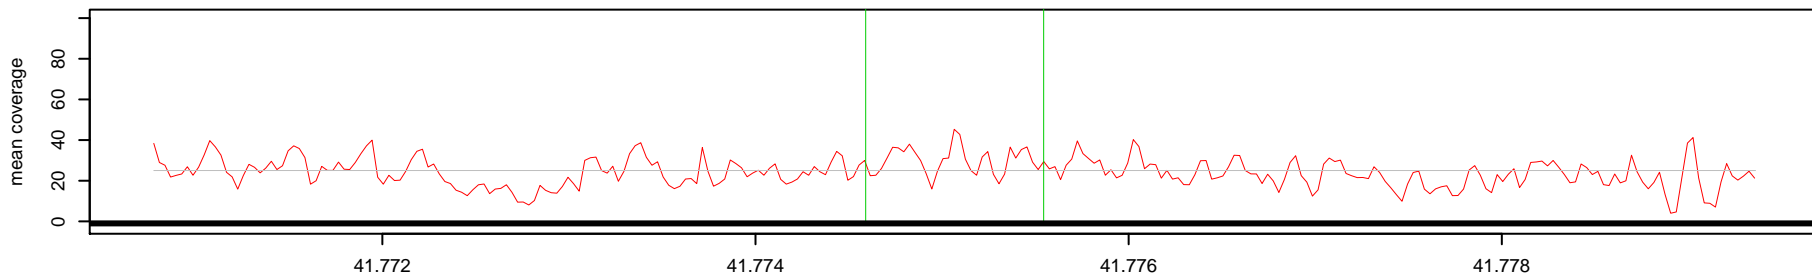

Log2( AK1 read depth / NA10851 read depth)

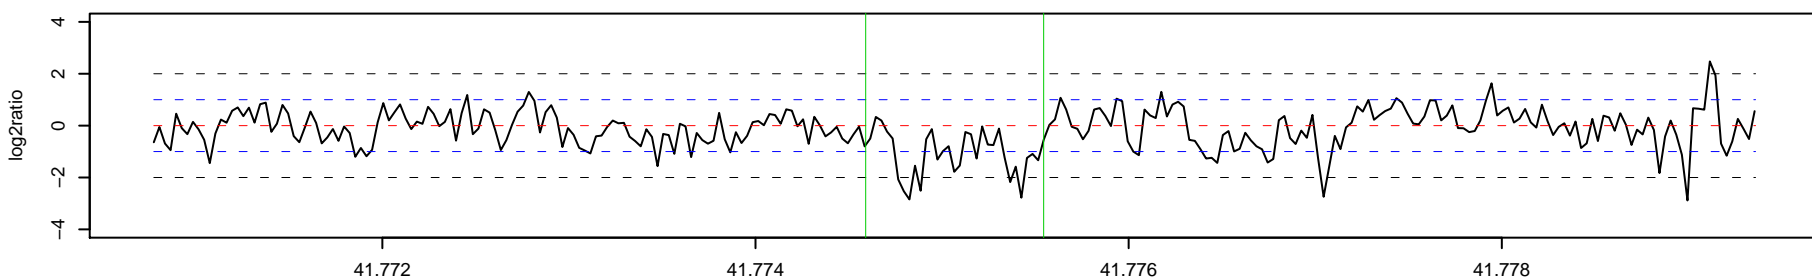

446\_AK1 Chr 11 : 42770673 – 42774665 , 3993 bp (aCGH relative log2ratio= 4.39 )

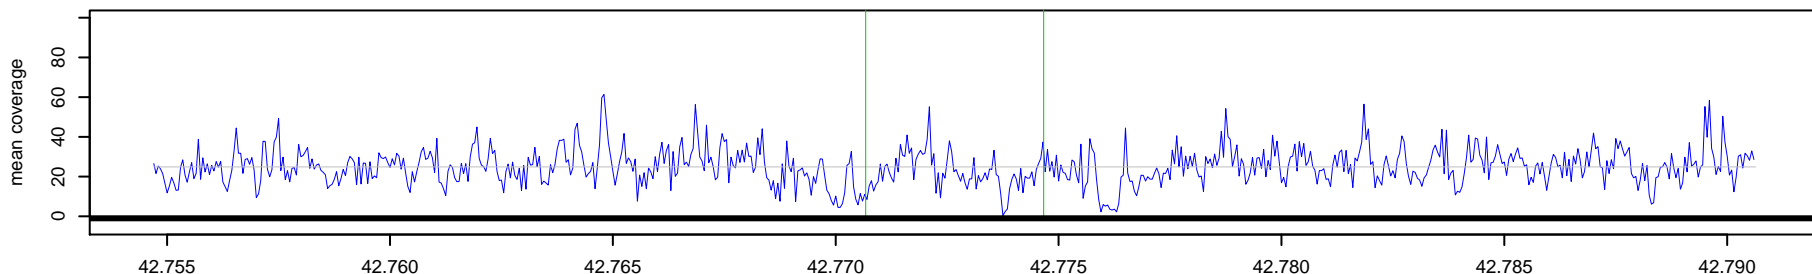

446\_NA10851 Chr 11 : 42770673 – 42774665 , 3993 bp (aCGH relative log2ratio= 4.39 )

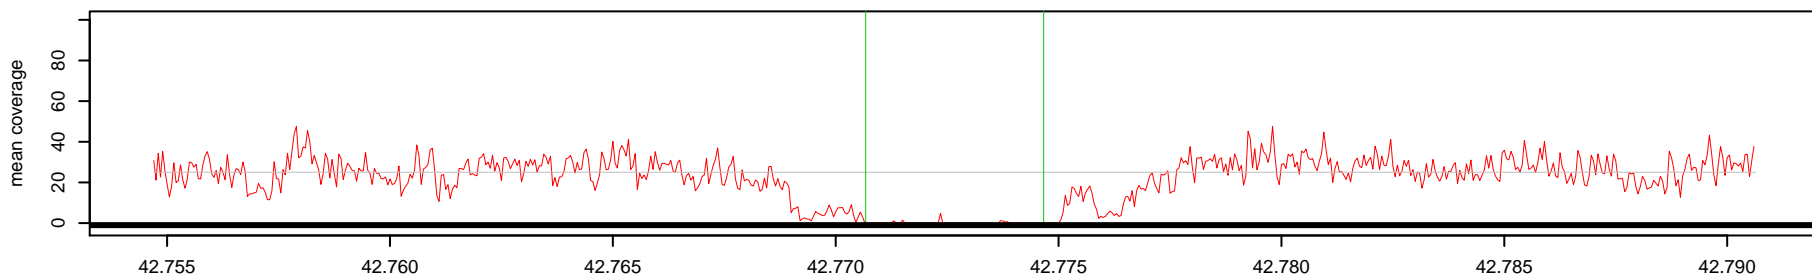

Log2( AK1 read depth / NA10851 read depth)

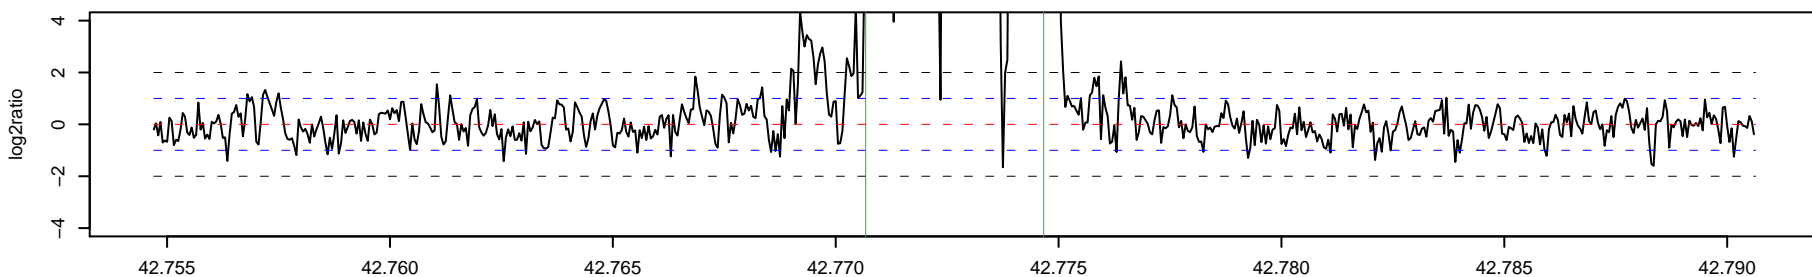

447\_AK1 Chr 11 : 45386415 - 45387454 , 1040 bp (aCGH relative log2ratio= 0.73 )

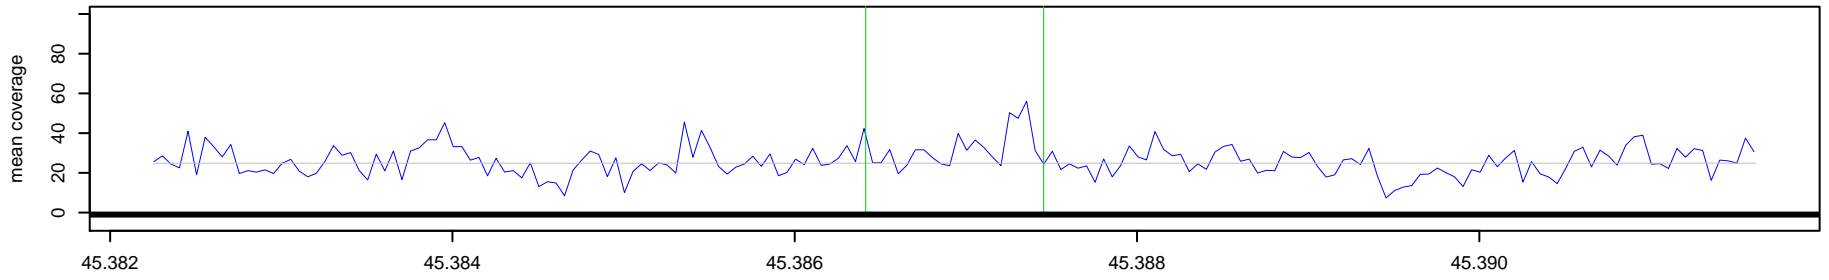

447\_NA10851 Chr 11 : 45386415 - 45387454 , 1040 bp (aCGH relative log2ratio= 0.73 )

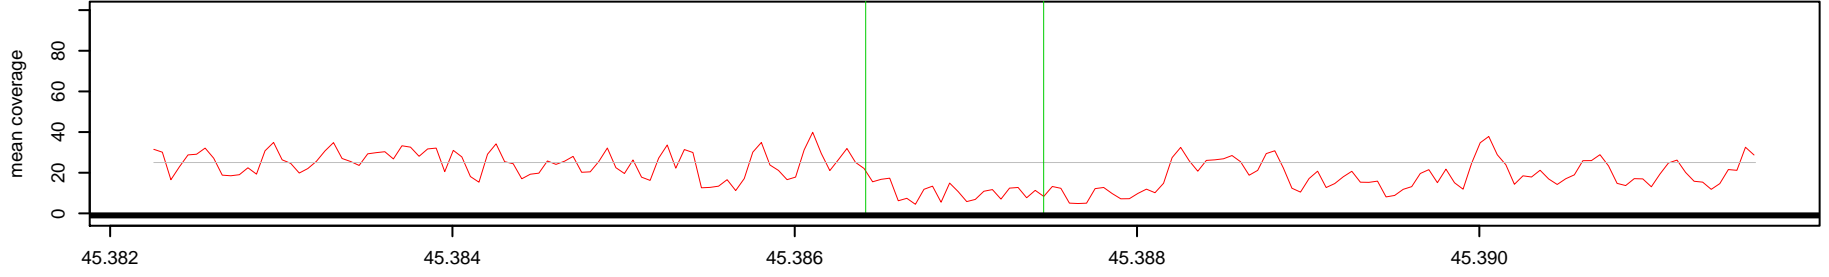

Log2( AK1 read depth / NA10851 read depth)

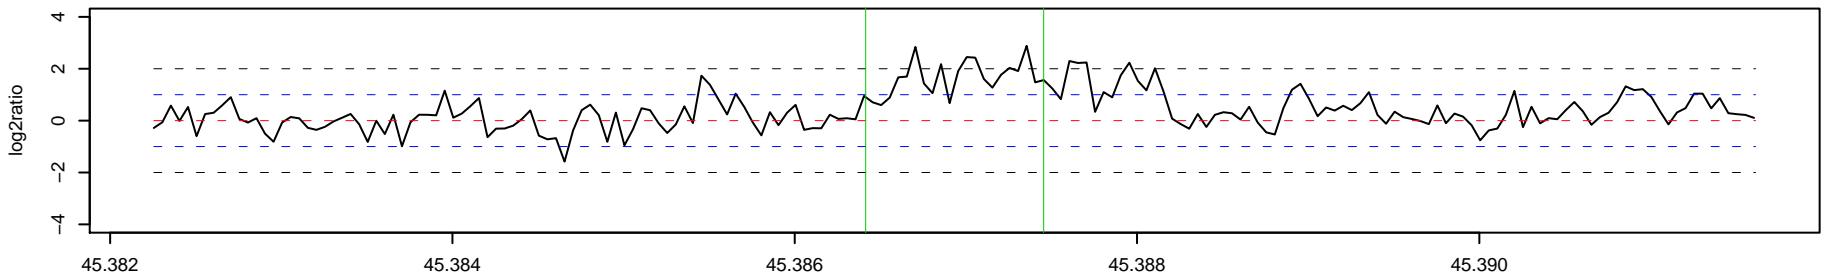

448\_AK1 Chr 11 : 47018205 - 47020205 , 2001 bp (aCGH relative log2ratio= 1.23 )

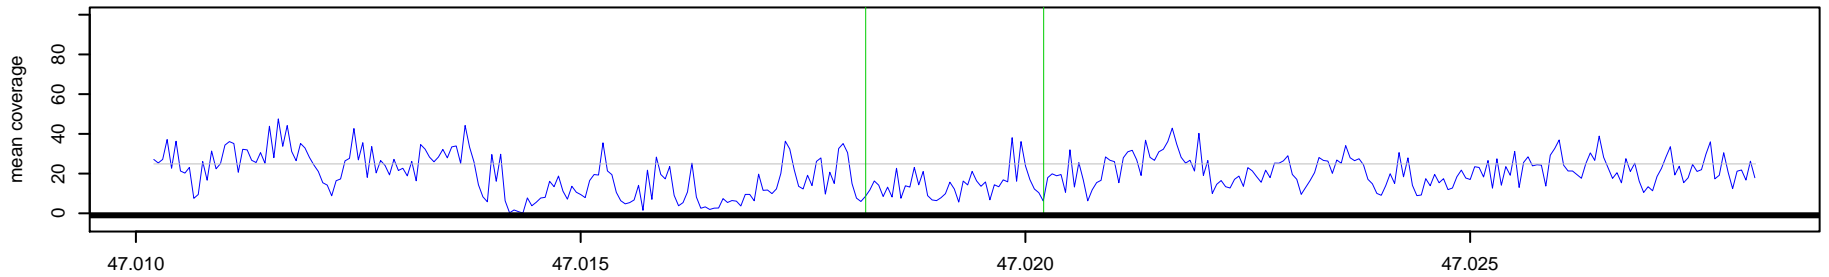

448\_NA10851 Chr 11 : 47018205 - 47020205 , 2001 bp (aCGH relative log2ratio= 1.23 )

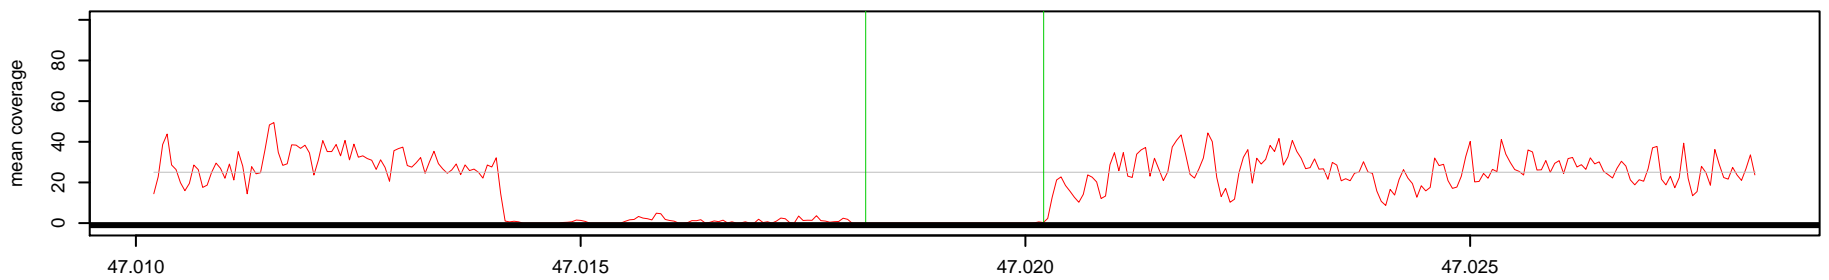

Log2( AK1 read depth / NA10851 read depth)

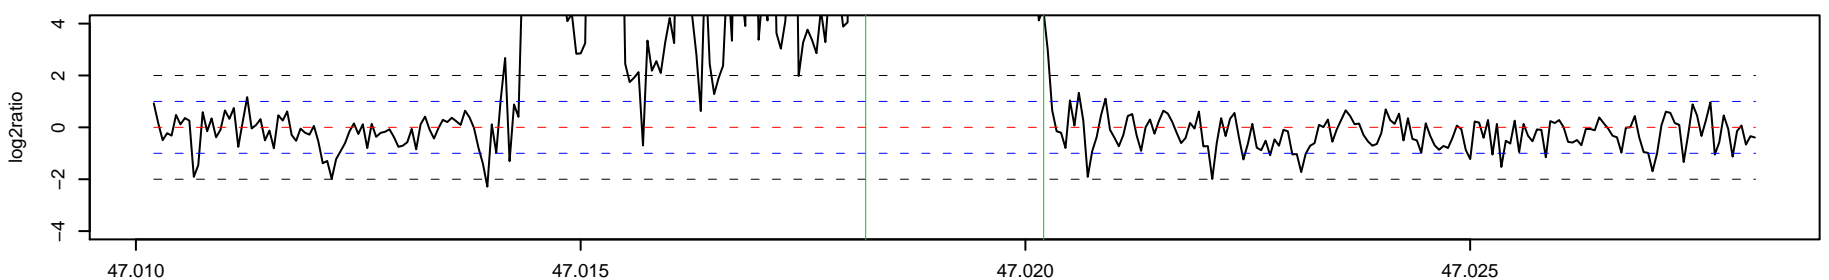

449\_AK1 Chr 11 : 47896081 – 47898841 , 2761 bp (aCGH relative log2ratio= -0.87 )

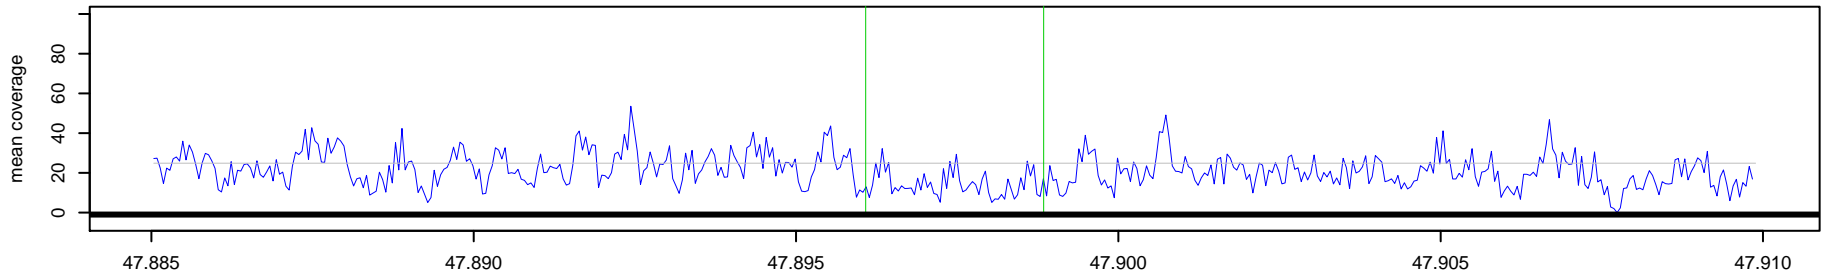

449\_NA10851 Chr 11 : 47896081 – 47898841 , 2761 bp (aCGH relative log2ratio= -0.87 )

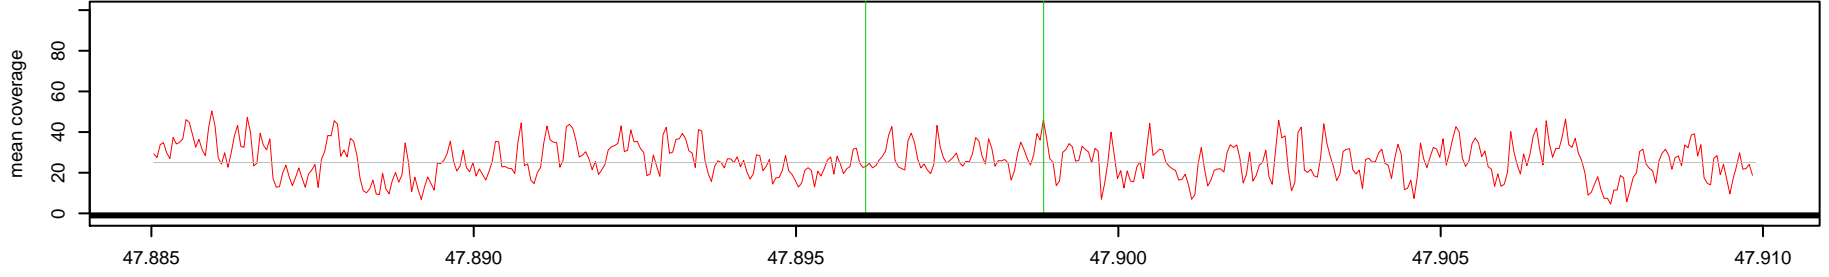

Log2( AK1 read depth / NA10851 read depth)

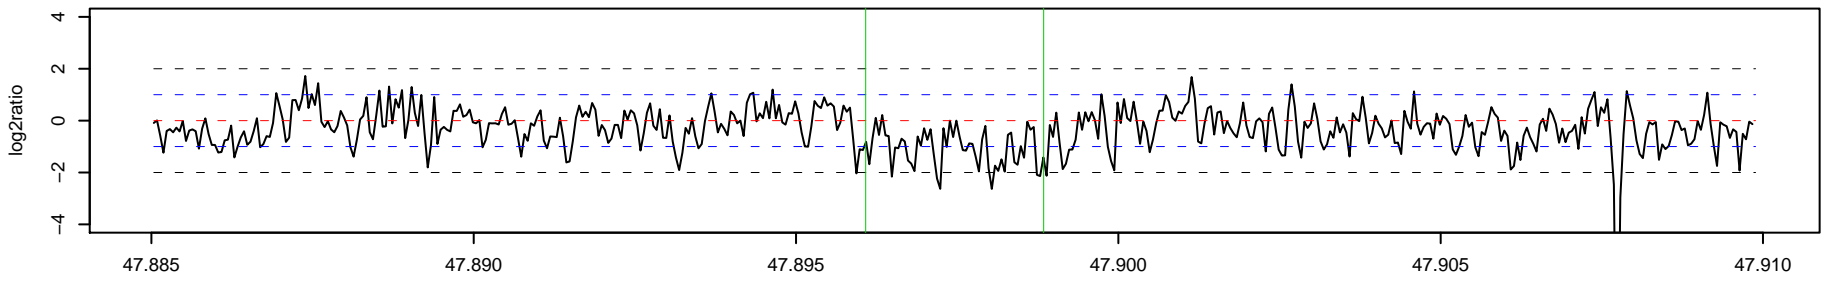

450\_AK1 Chr 11 : 48284081 – 48284620 , 540 bp (aCGH relative log2ratio= 0.62 )

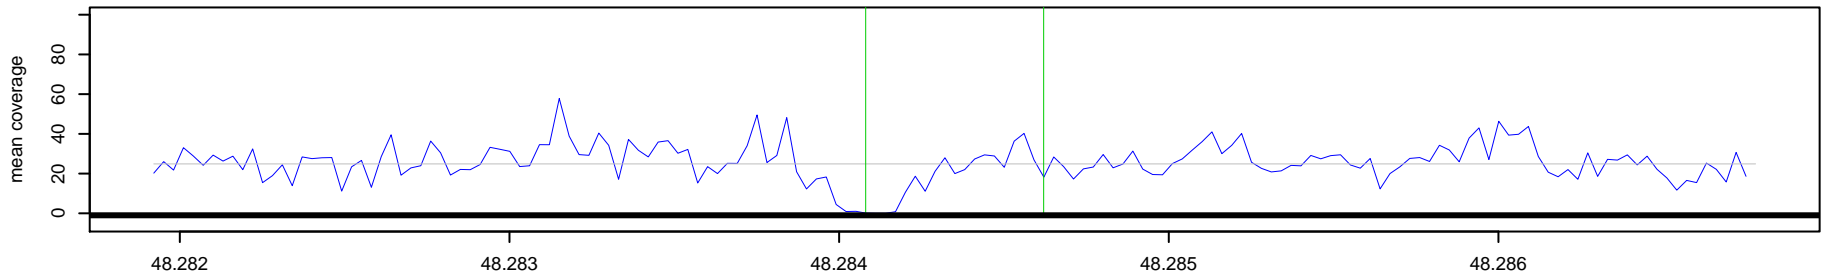

450\_NA10851 Chr 11 : 48284081 – 48284620 , 540 bp (aCGH relative log2ratio= 0.62 )

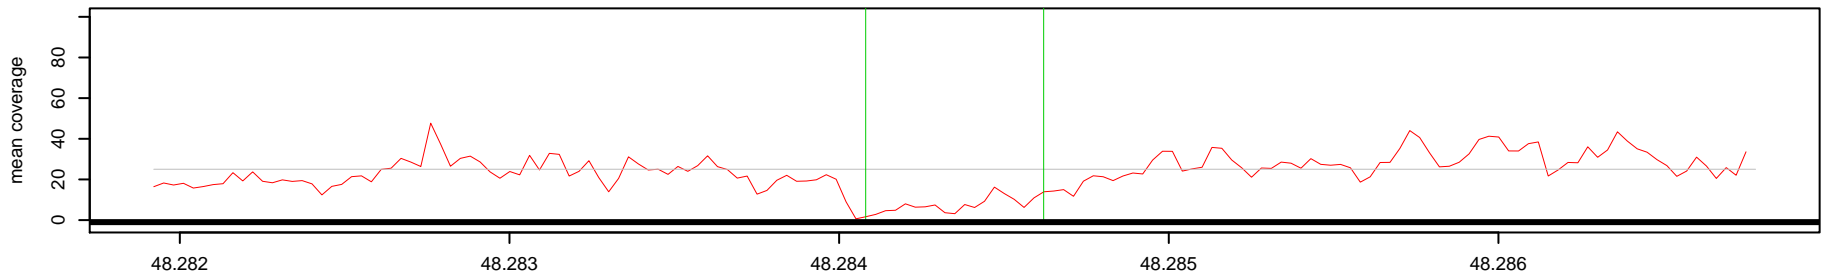

Log2( AK1 read depth / NA10851 read depth)

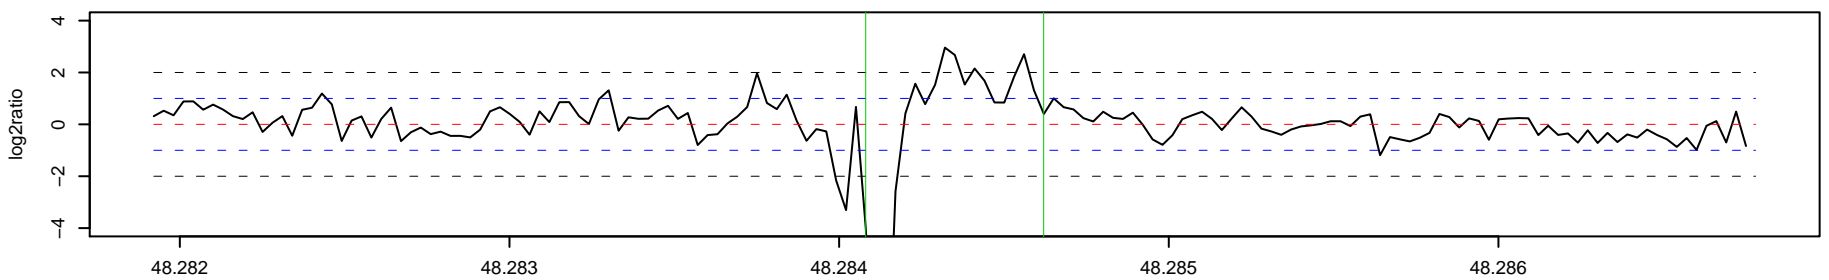

451 \_ AK1 Chr 11 : 49666188 – 49725816 , 59629 bp (aCGH relative log2ratio= 0.71 )

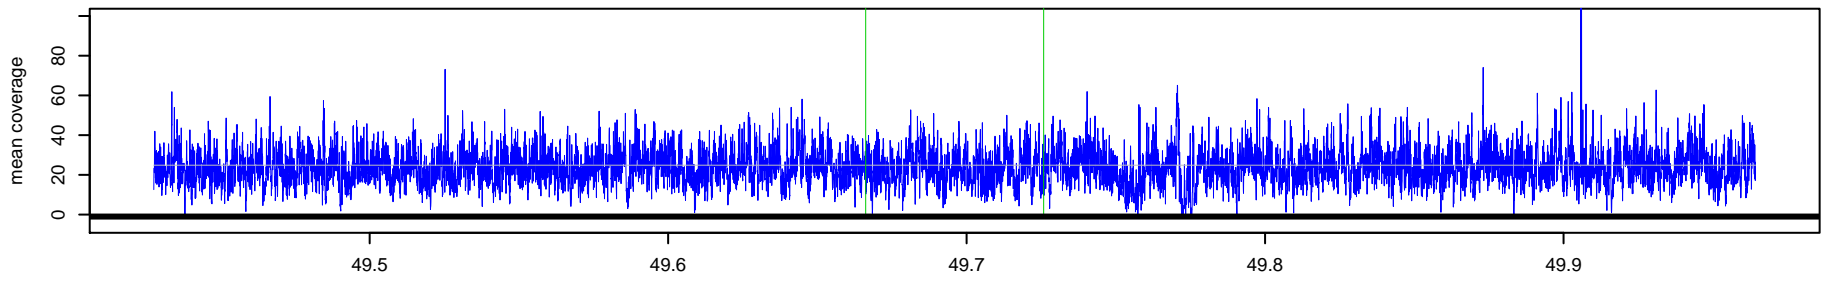

451 \_ NA10851 Chr 11 : 49666188 – 49725816 , 59629 bp (aCGH relative log2ratio= 0.71 )

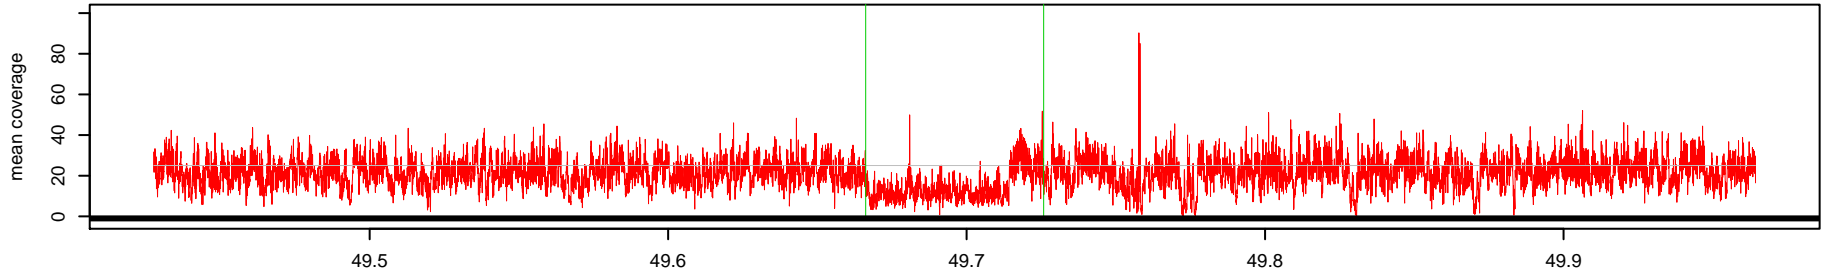

Log2( AK1 read depth / NA10851 read depth)

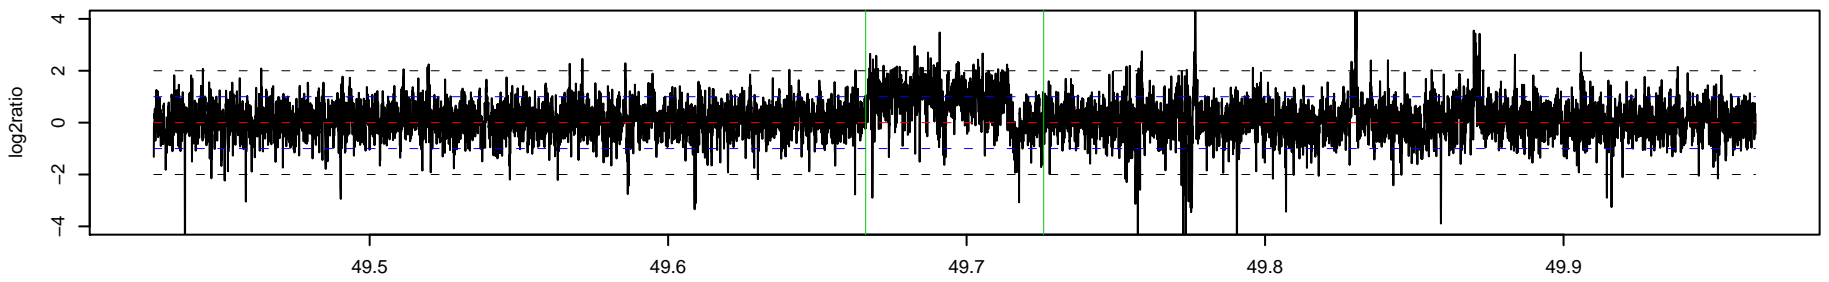

452 \_ AK1 Chr 11 : 56196283 – 56196815 , 533 bp (aCGH relative log2ratio= 0.86 )

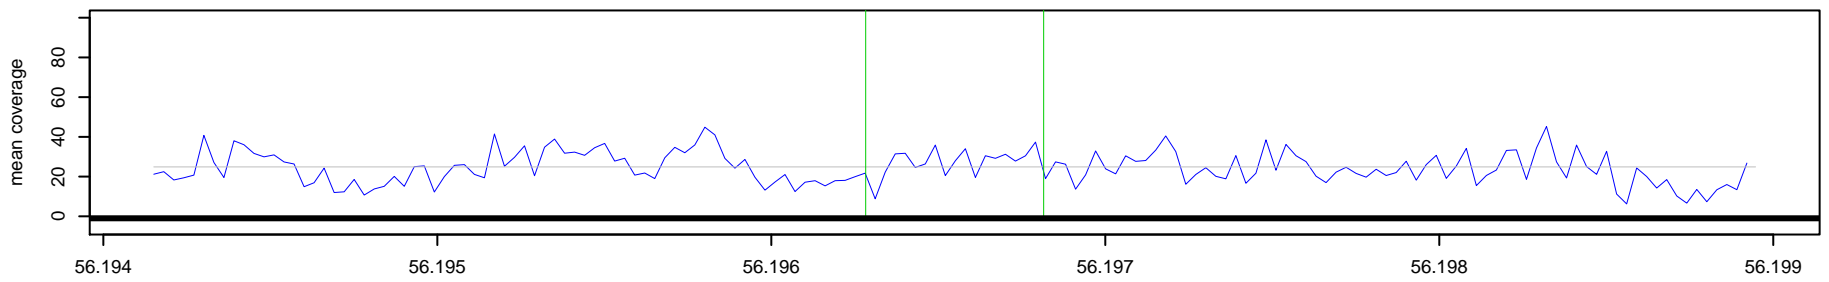

452 \_ NA10851 Chr 11 : 56196283 – 56196815 , 533 bp (aCGH relative log2ratio= 0.86 )

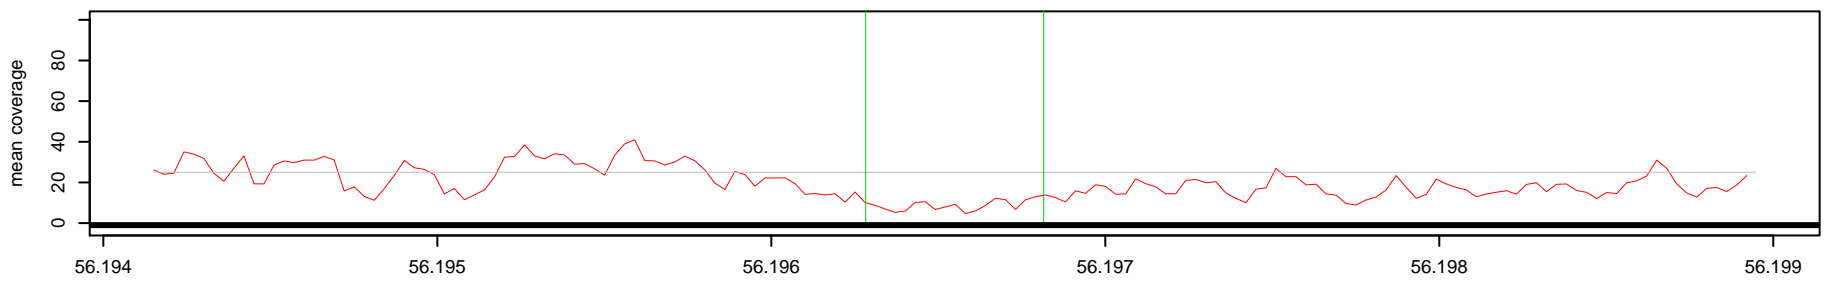

Log2( AK1 read depth / NA10851 read depth)

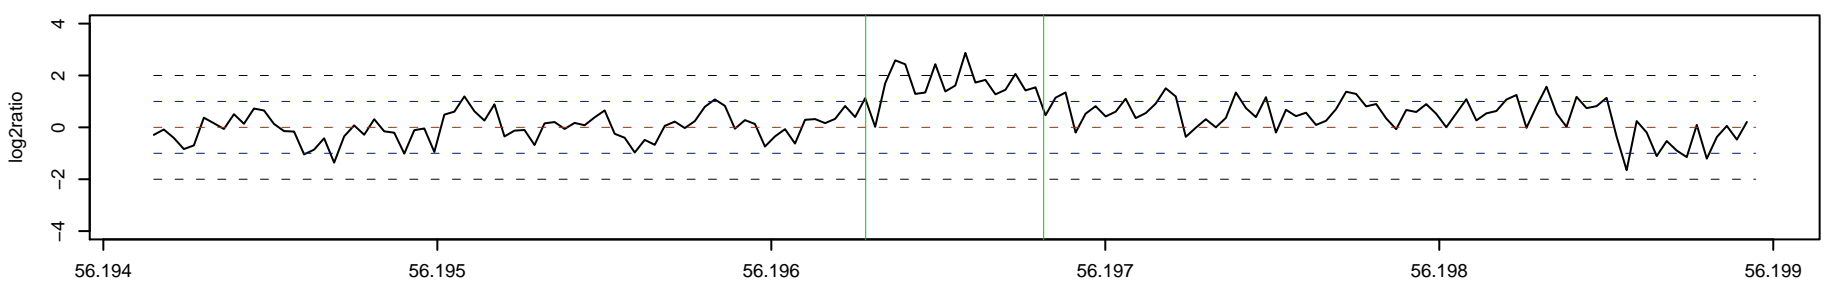

453\_AK1 Chr 11 : 56385365 – 56385999 , 635 bp (aCGH relative log2ratio= -0.84 )

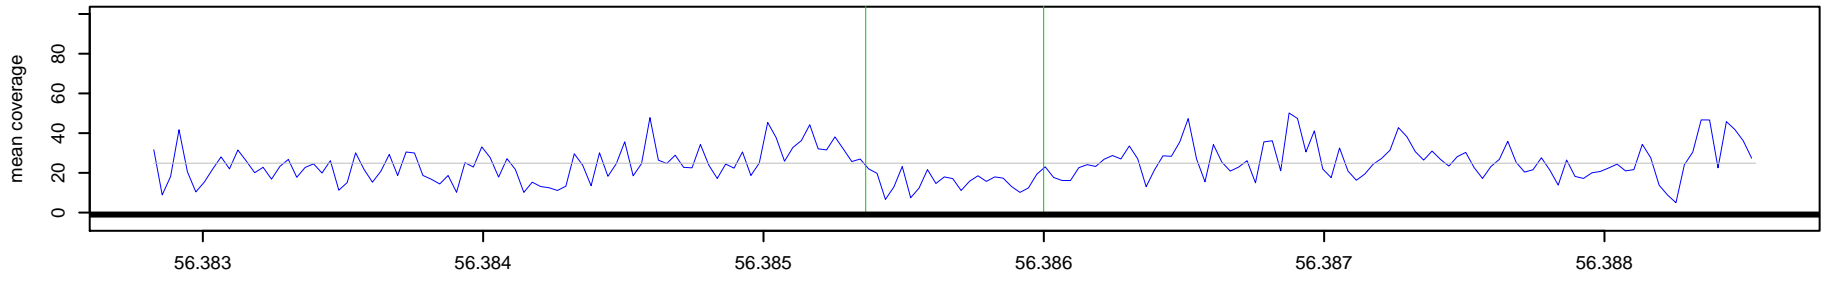

453\_NA10851 Chr 11 : 56385365 – 56385999 , 635 bp (aCGH relative log2ratio= -0.84 )

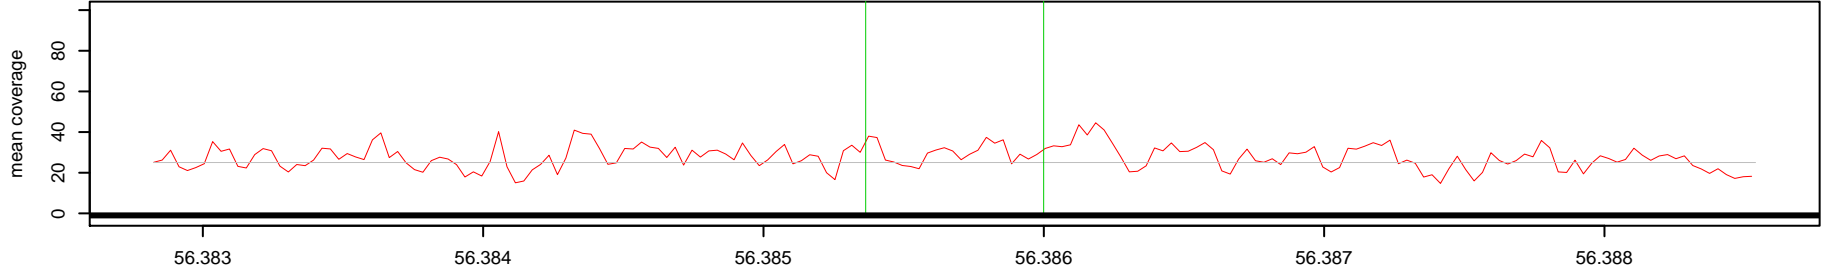

Log2( AK1 read depth / NA10851 read depth)

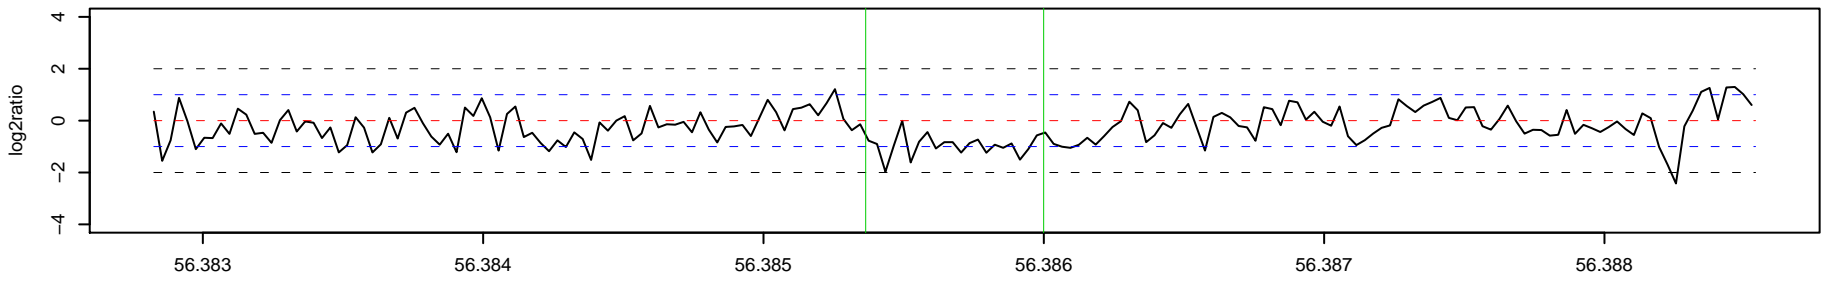

454\_AK1 Chr 11 : 58389008 – 58392346 , 3339 bp (aCGH relative log2ratio= -0.74 )

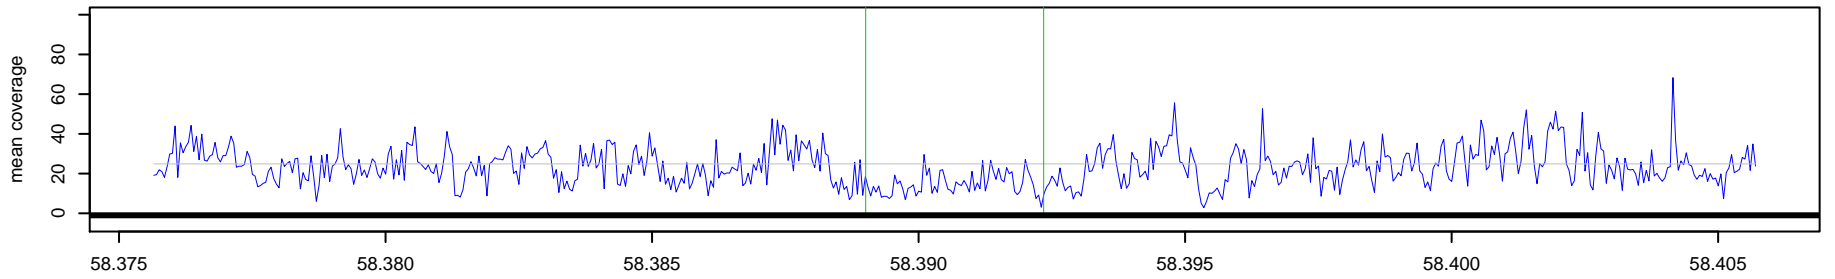

454\_NA10851 Chr 11 : 58389008 – 58392346 , 3339 bp (aCGH relative log2ratio= -0.74 )

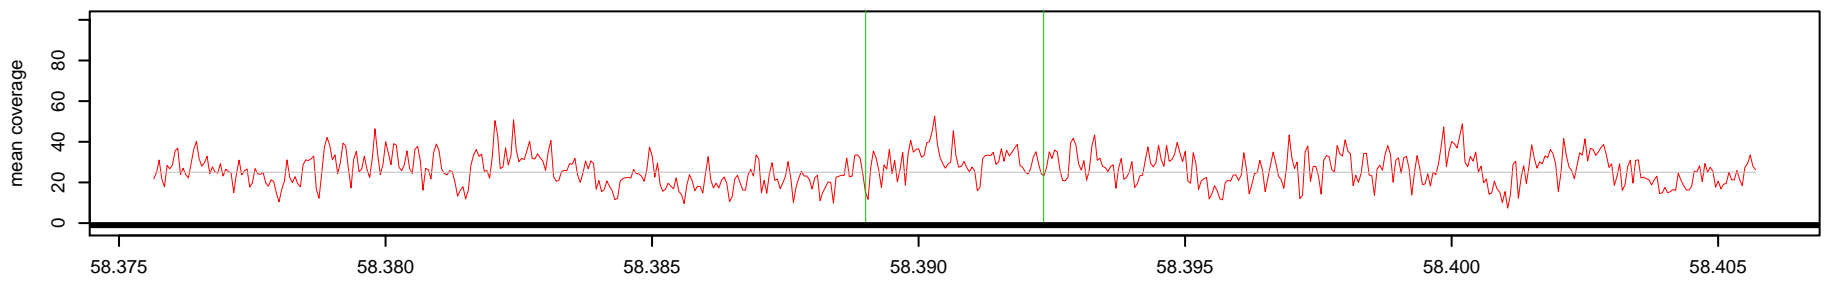

Log2( AK1 read depth / NA10851 read depth)

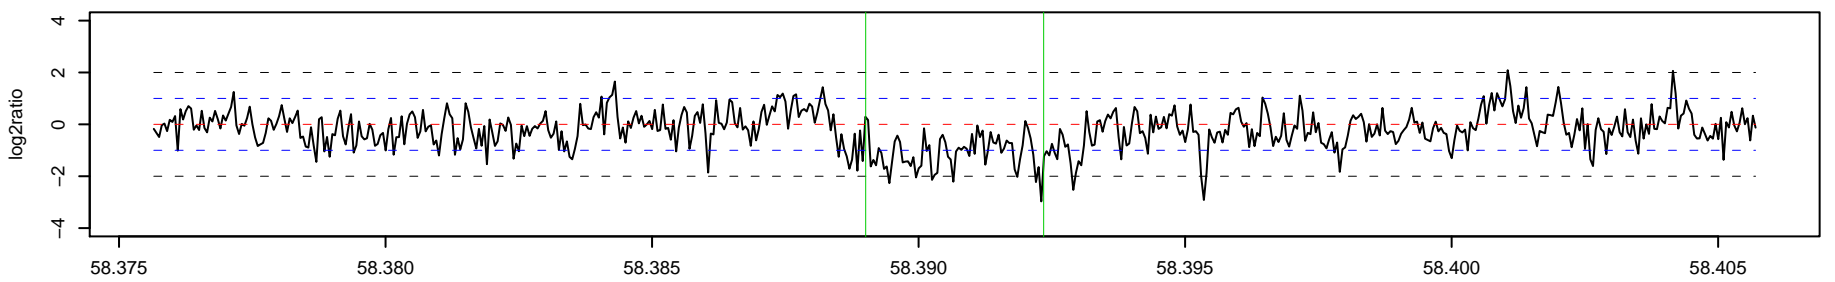

455\_AK1 Chr 11 : 65549031 - 65559318 , 10288 bp (aCGH relative log2ratio= -0.35 )

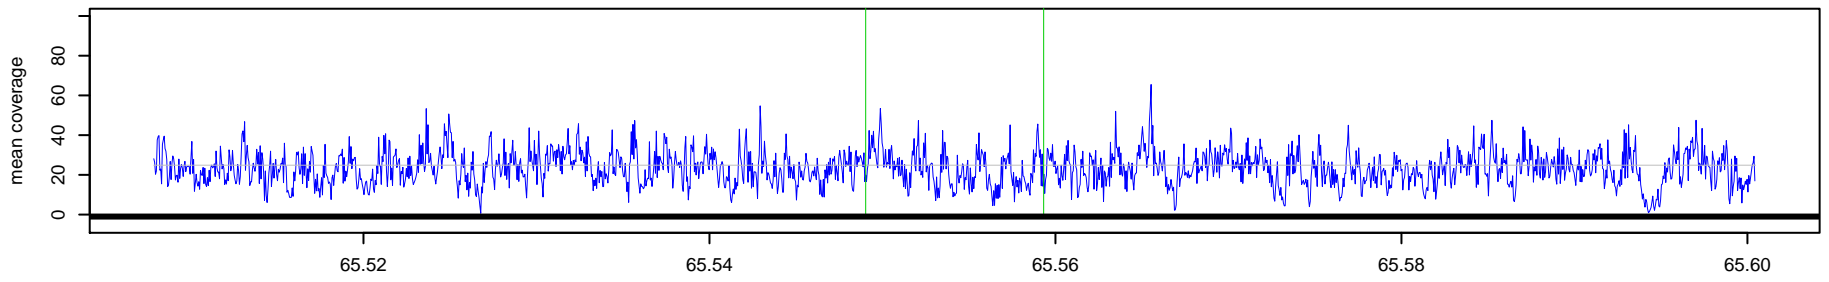

455\_NA10851 Chr 11 : 65549031 - 65559318 , 10288 bp (aCGH relative log2ratio= -0.35 )

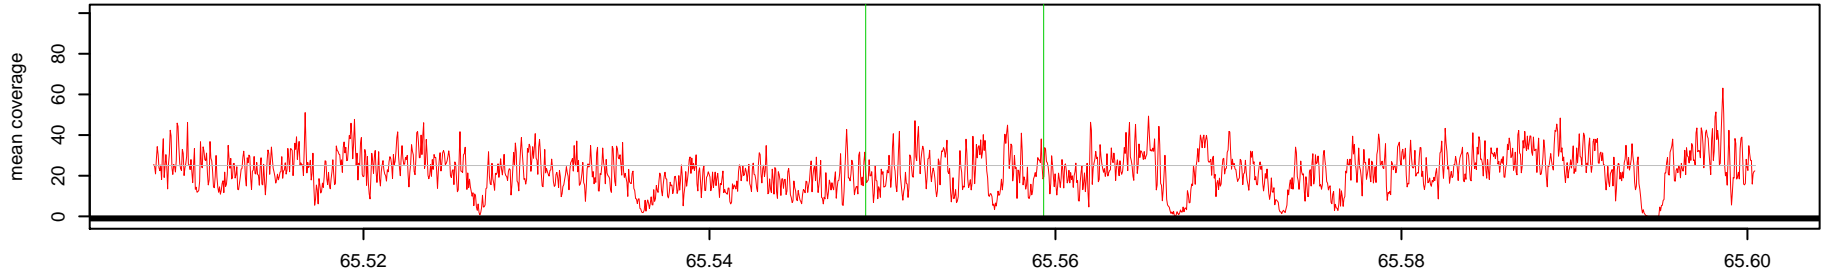

Log2( AK1 read depth / NA10851 read depth)

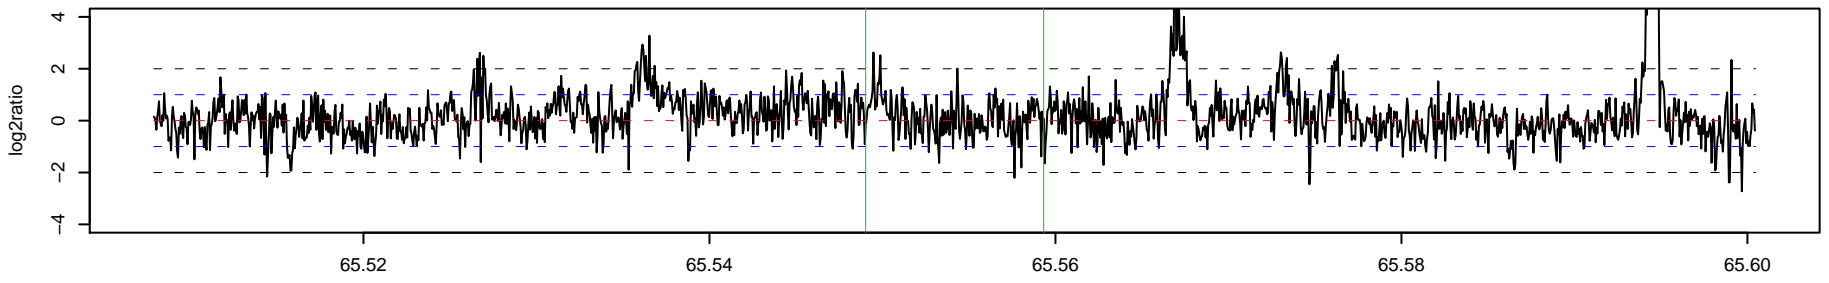

456\_AK1 Chr 11 : 66468525 - 66469992 , 1468 bp (aCGH relative log2ratio= 2.03 )

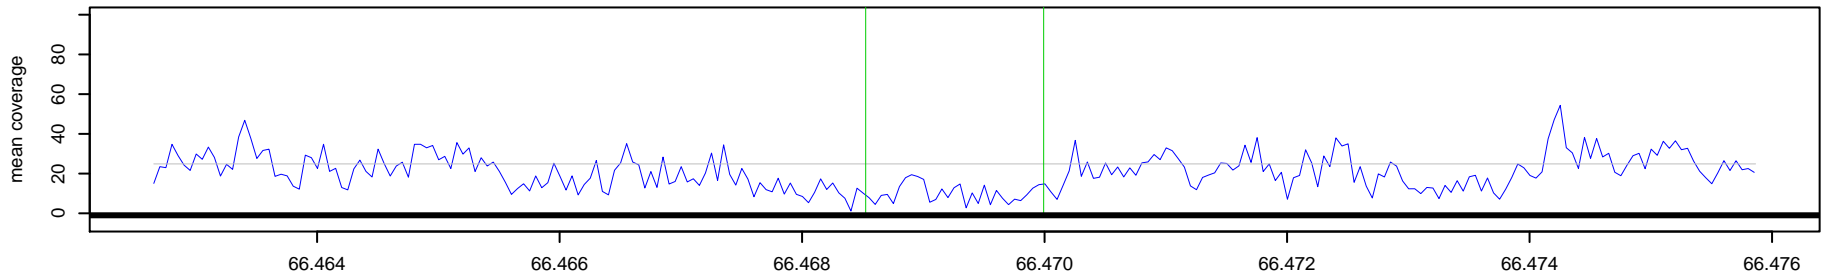

456\_NA10851 Chr 11 : 66468525 - 66469992 , 1468 bp (aCGH relative log2ratio= 2.03 )

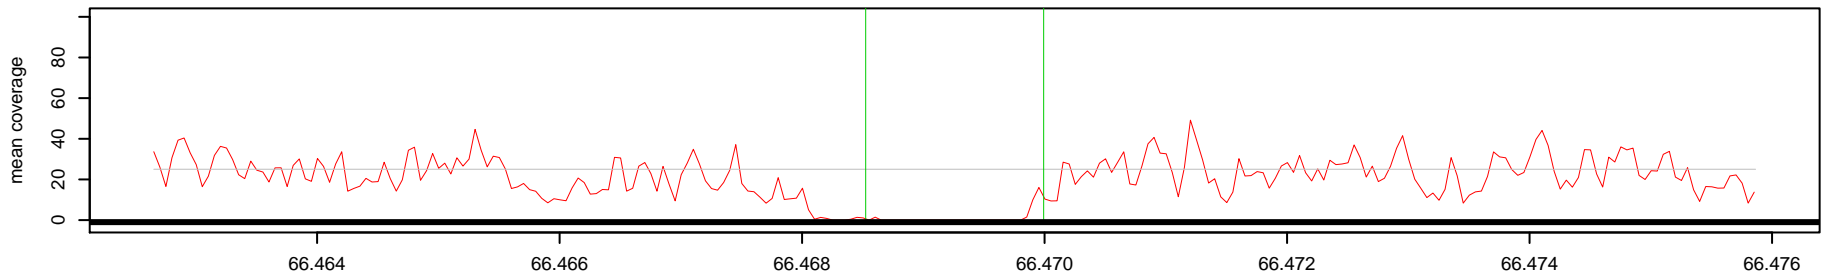

Log2( AK1 read depth / NA10851 read depth)

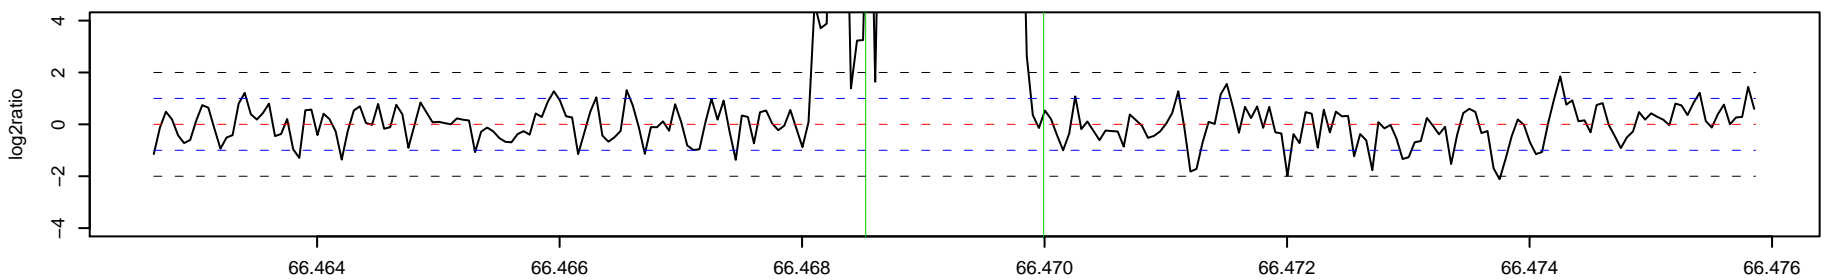



457\_AK1 Chr 11 : 69993181 – 69993702 , 522 bp (aCGH relative log2ratio= 0.22 )

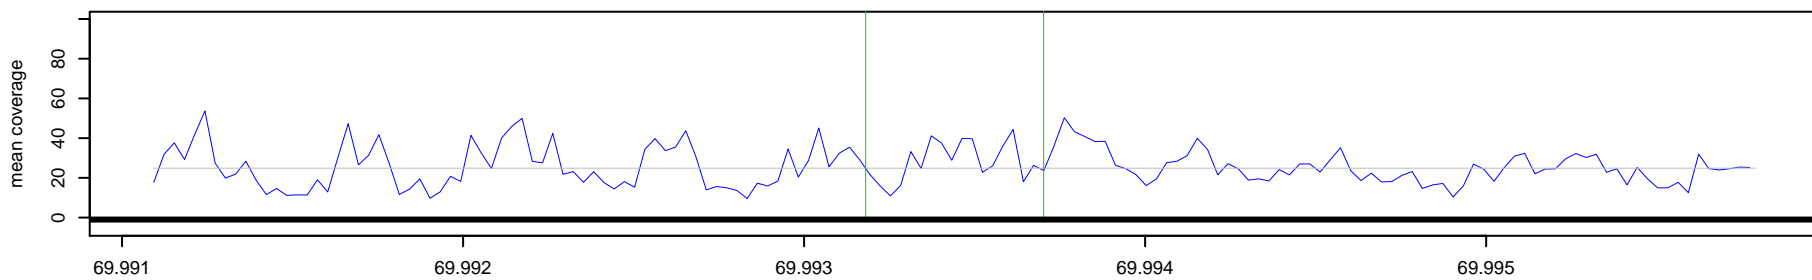

457\_NA10851 Chr 11 : 69993181 – 69993702 , 522 bp (aCGH relative log2ratio= 0.22 )

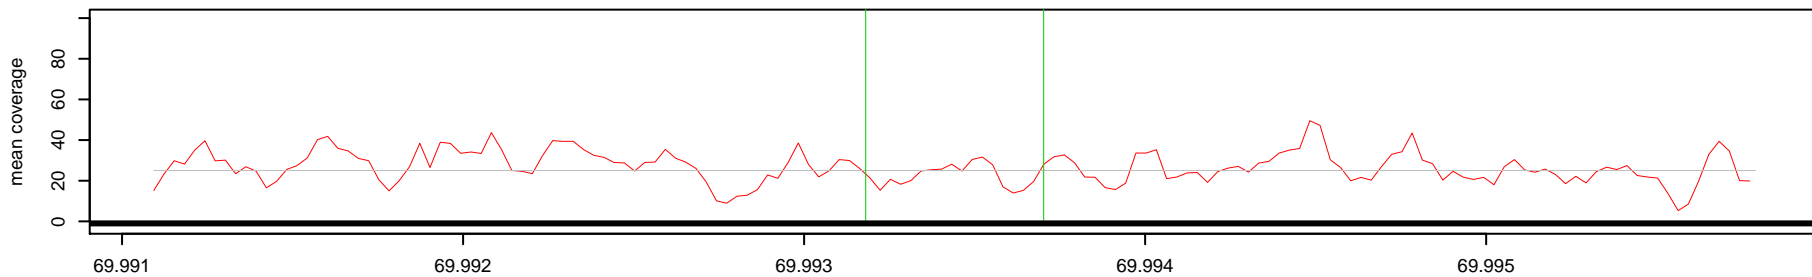

Log2( AK1 read depth / NA10851 read depth)

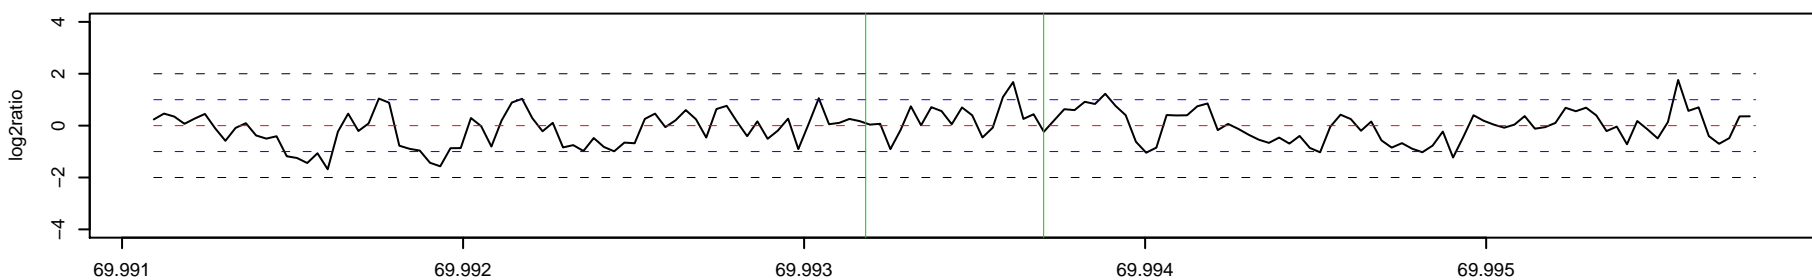

458\_AK1 Chr 11 : 70852737 – 70854347 , 1611 bp (aCGH relative log2ratio= -0.55 )

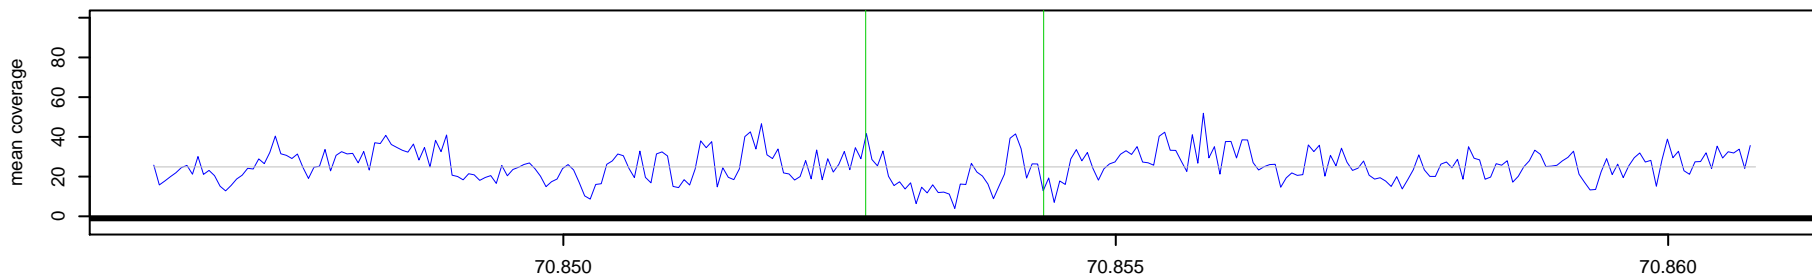

458\_NA10851 Chr 11 : 70852737 – 70854347 , 1611 bp (aCGH relative log2ratio= -0.55 )

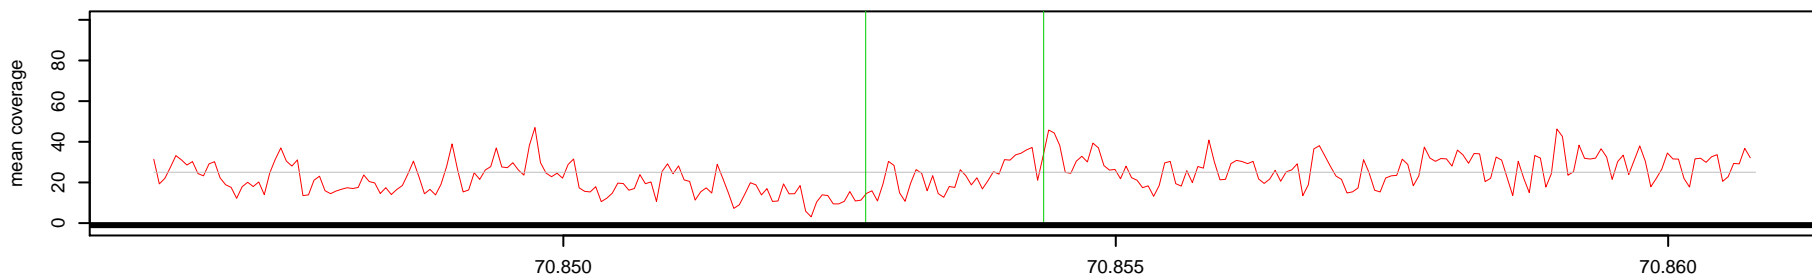

Log2( AK1 read depth / NA10851 read depth)

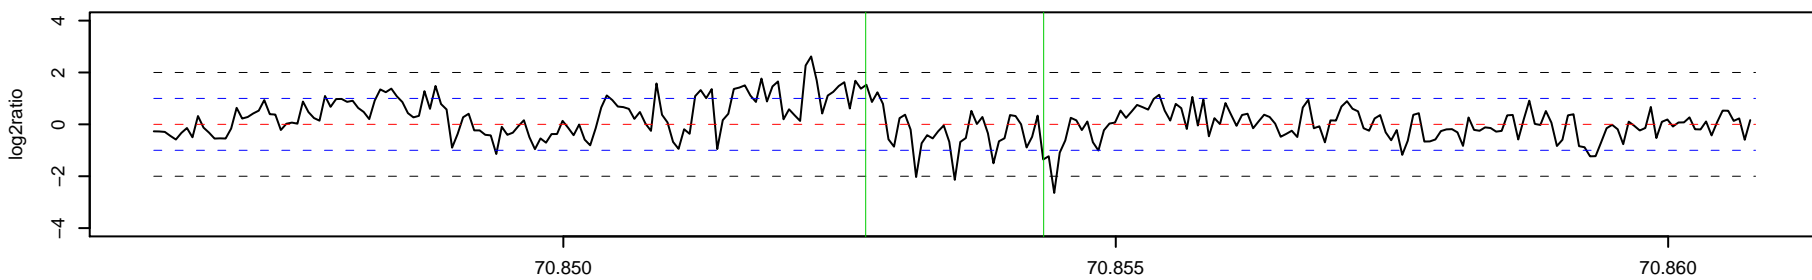

459\_AK1 Chr 11 : 73812759 – 73818386 , 5628 bp (aCGH relative log2ratio= -0.63 )

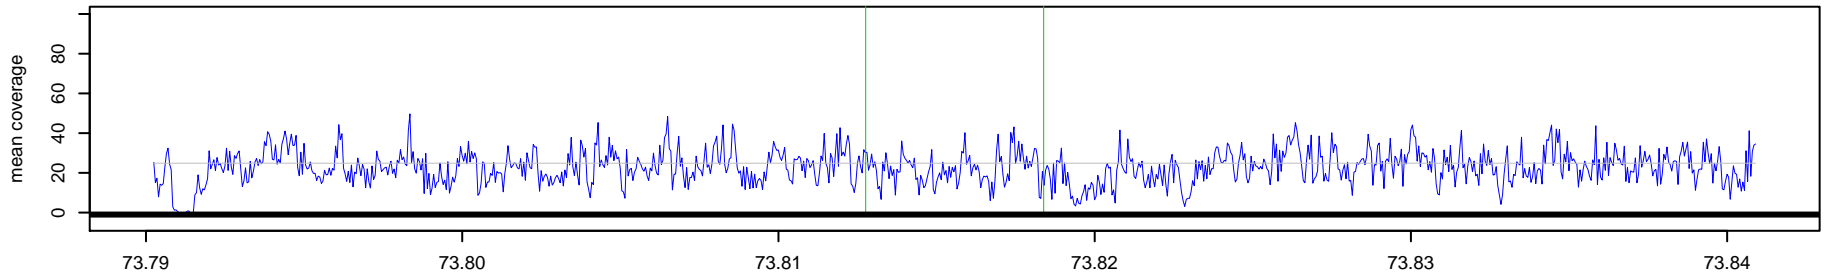

459\_NA10851 Chr 11 : 73812759 – 73818386 , 5628 bp (aCGH relative log2ratio= -0.63 )

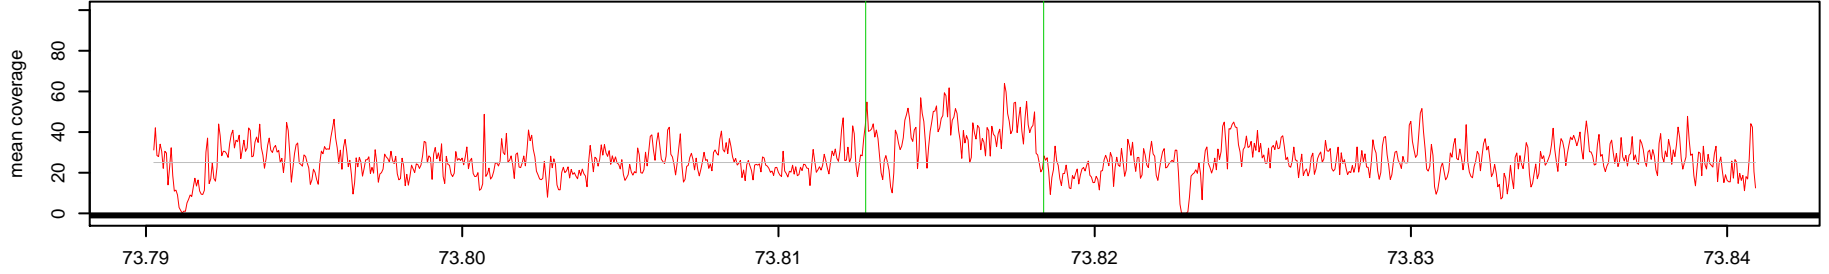

Log2( AK1 read depth / NA10851 read depth)

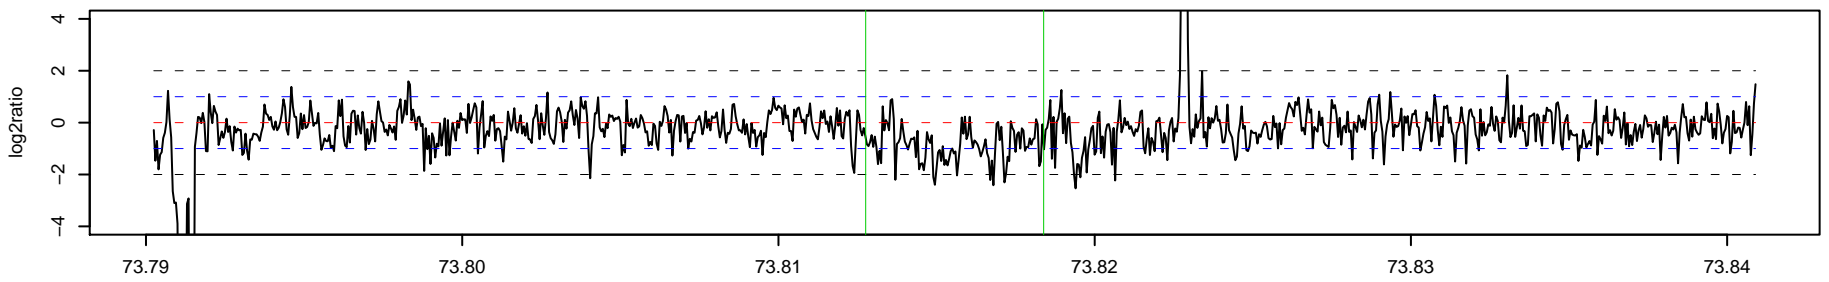

460\_AK1 Chr 11 : 85981841 – 85983987 , 2147 bp (aCGH relative log2ratio= -0.92 )

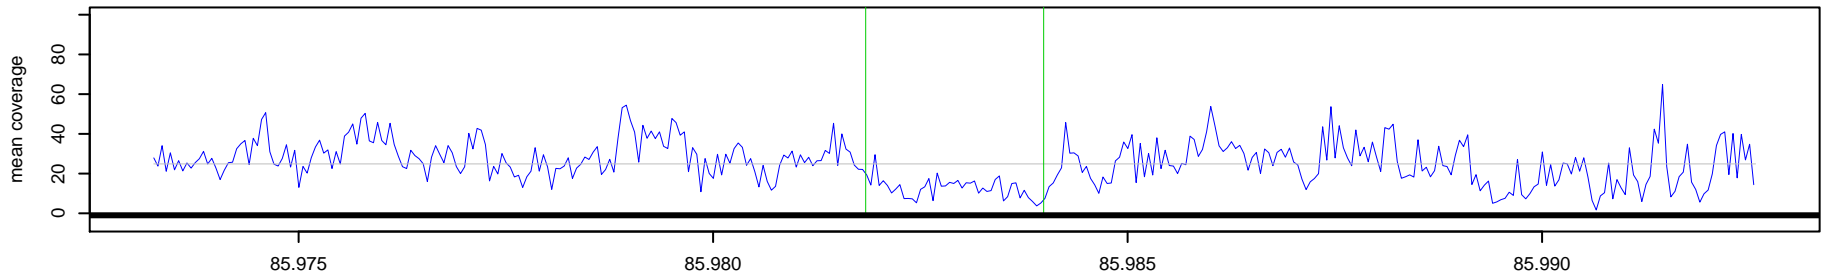

460\_NA10851 Chr 11 : 85981841 – 85983987 , 2147 bp (aCGH relative log2ratio= -0.92 )

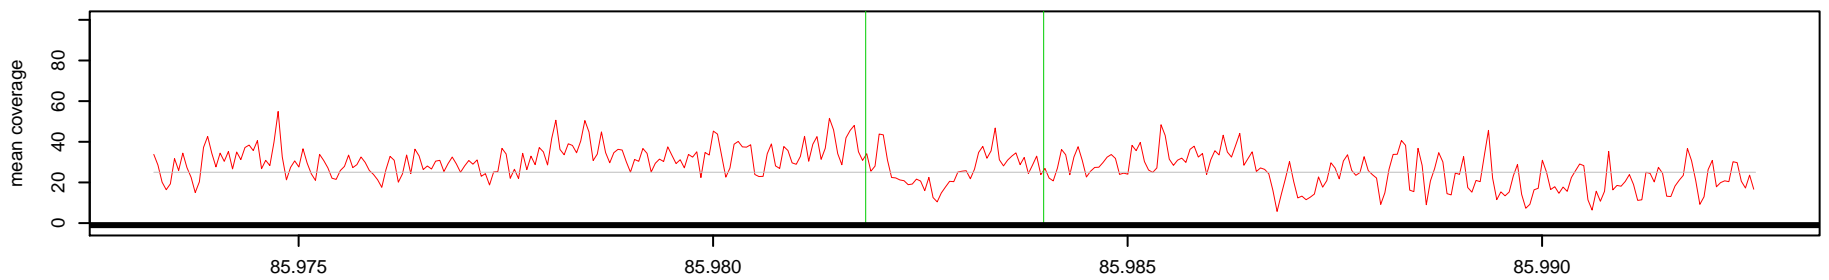

Log2( AK1 read depth / NA10851 read depth)

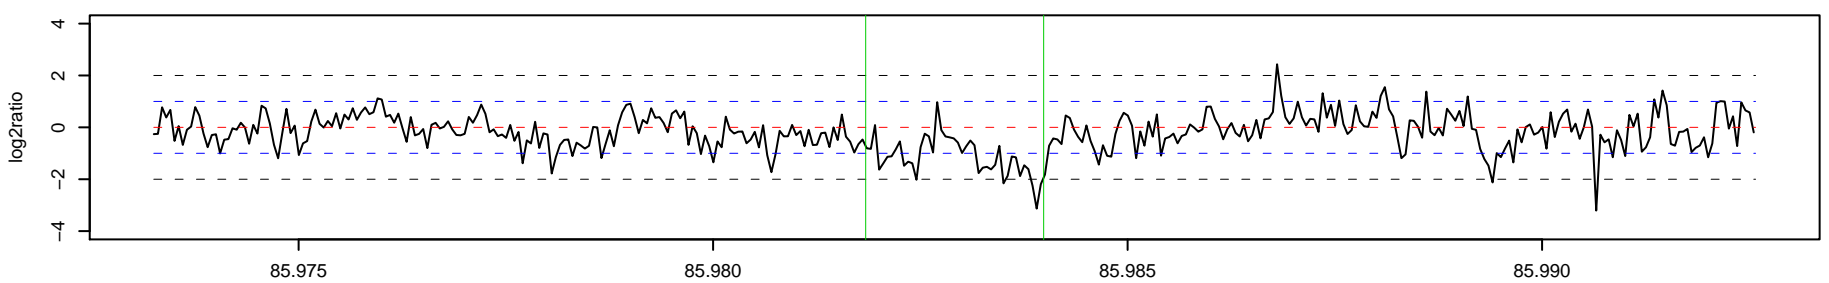

461 \_ AK1 Chr 11 : 89184916 – 89189437 , 4522 bp (aCGH relative log2ratio= 0.80 )

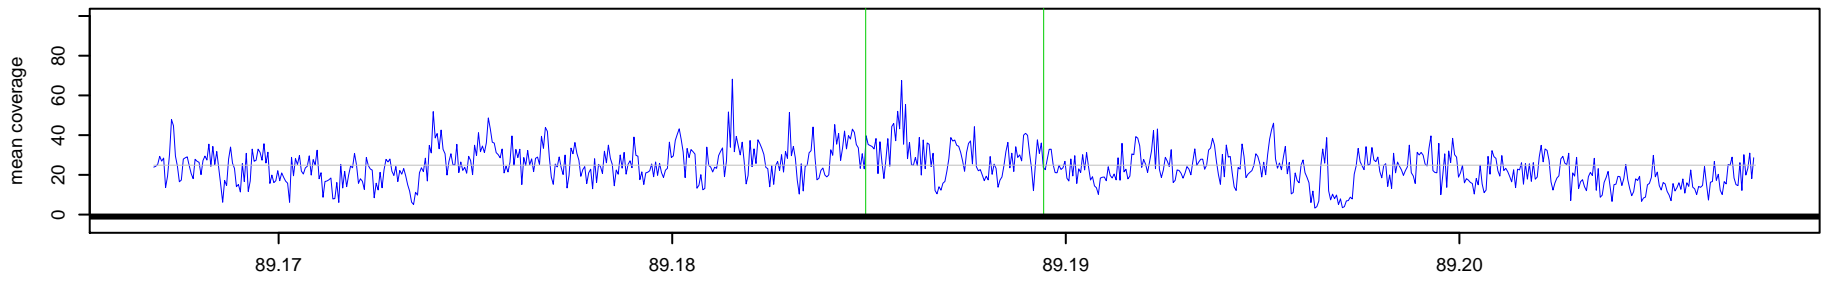

461 \_ NA10851 Chr 11 : 89184916 – 89189437 , 4522 bp (aCGH relative log2ratio= 0.80 )

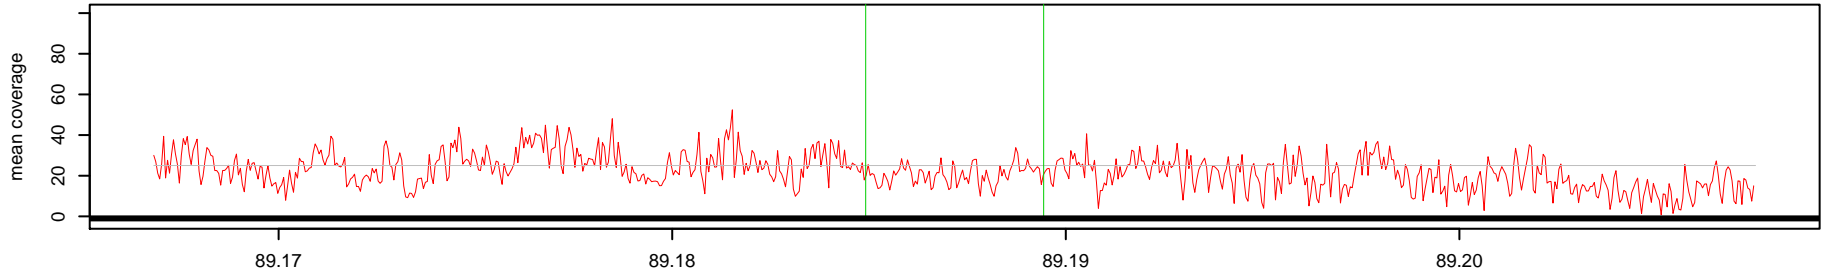

Log2( AK1 read depth / NA10851 read depth)

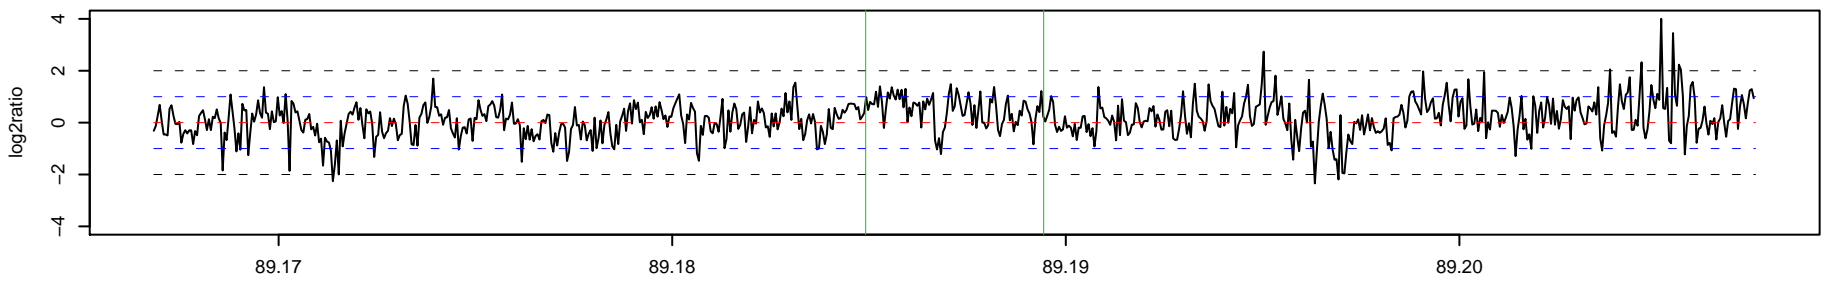

462 \_ AK1 Chr 11 : 89294139 – 89296760 , 2622 bp (aCGH relative log2ratio= -0.77 )

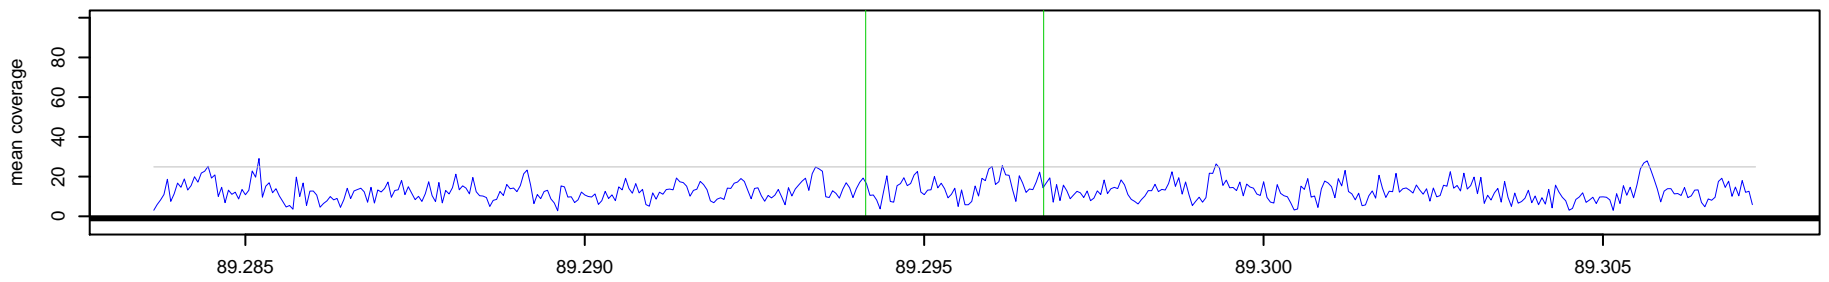

462 \_ NA10851 Chr 11 : 89294139 – 89296760 , 2622 bp (aCGH relative log2ratio= -0.77 )

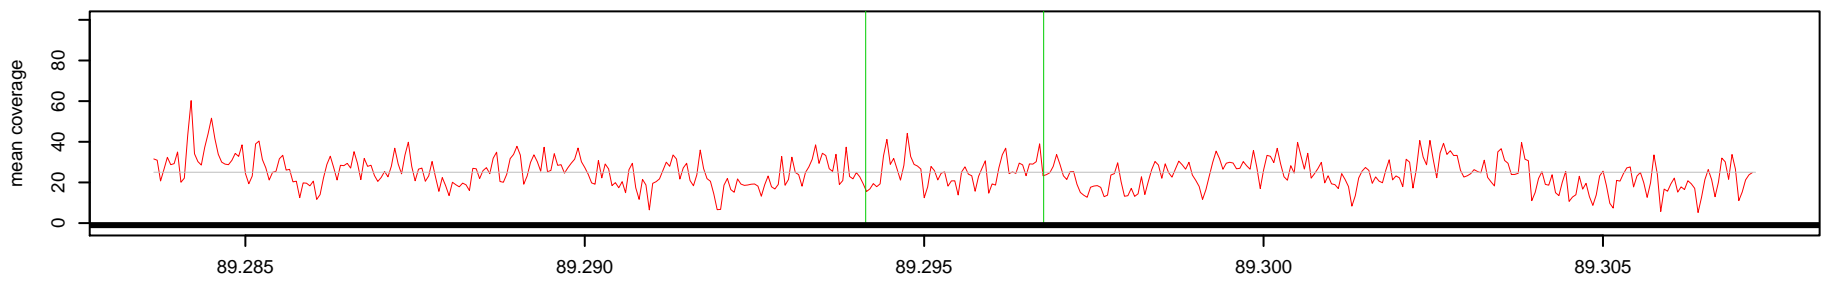

Log2( AK1 read depth / NA10851 read depth)

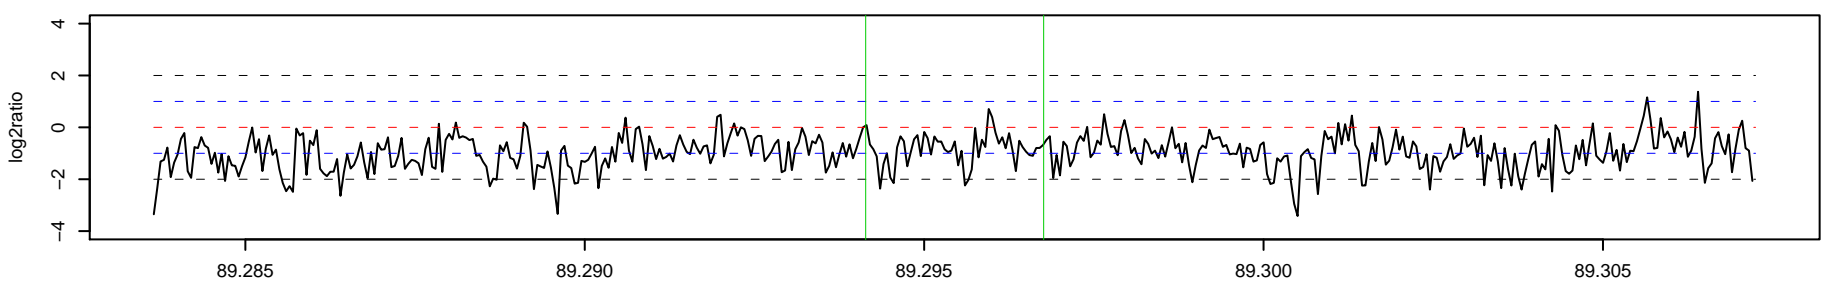

463\_AK1 Chr 11 : 97483630 - 97484130 , 501 bp (aCGH relative log2ratio= 0.66 )

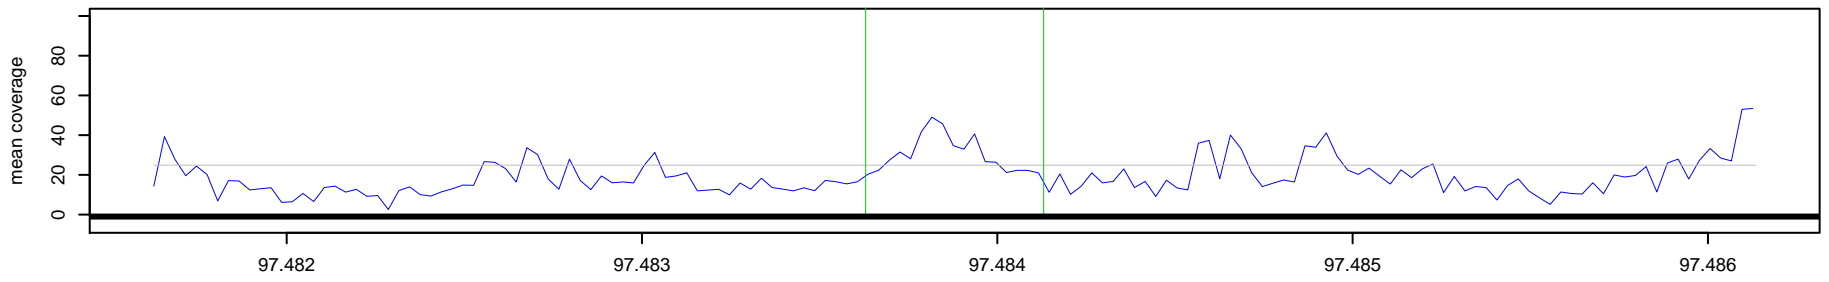

463\_NA10851 Chr 11 : 97483630 - 97484130 , 501 bp (aCGH relative log2ratio= 0.66 )

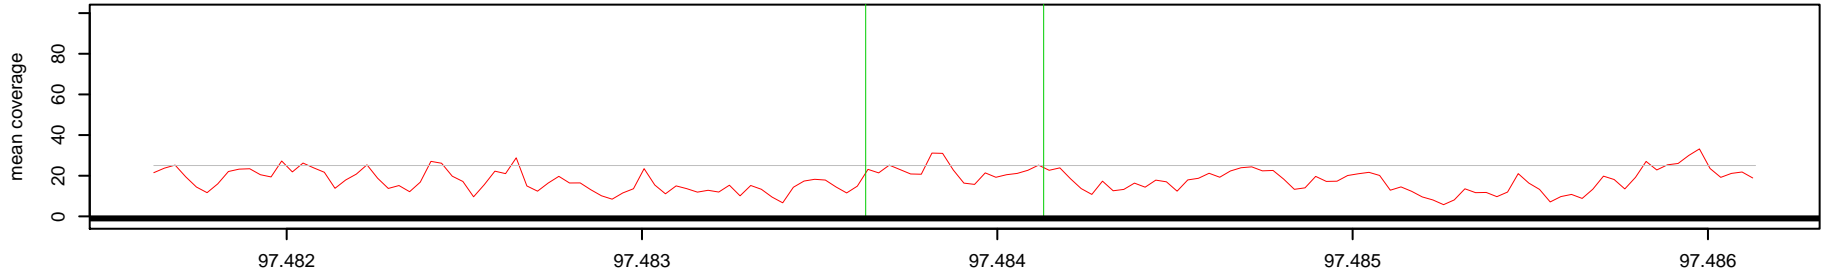

Log2( AK1 read depth / NA10851 read depth)

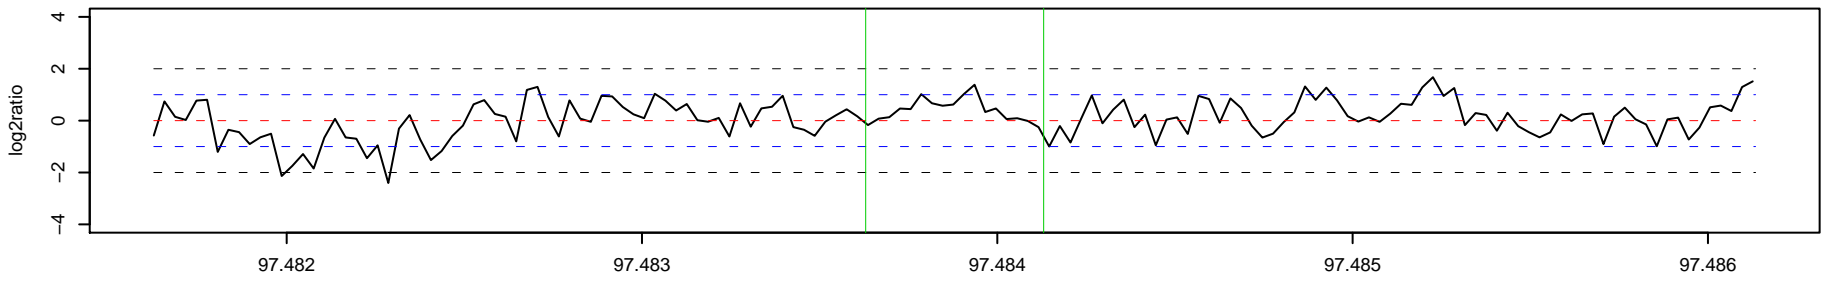

464\_AK1 Chr 11 : 97753358 - 97753847 , 490 bp (aCGH relative log2ratio= 4.32 )

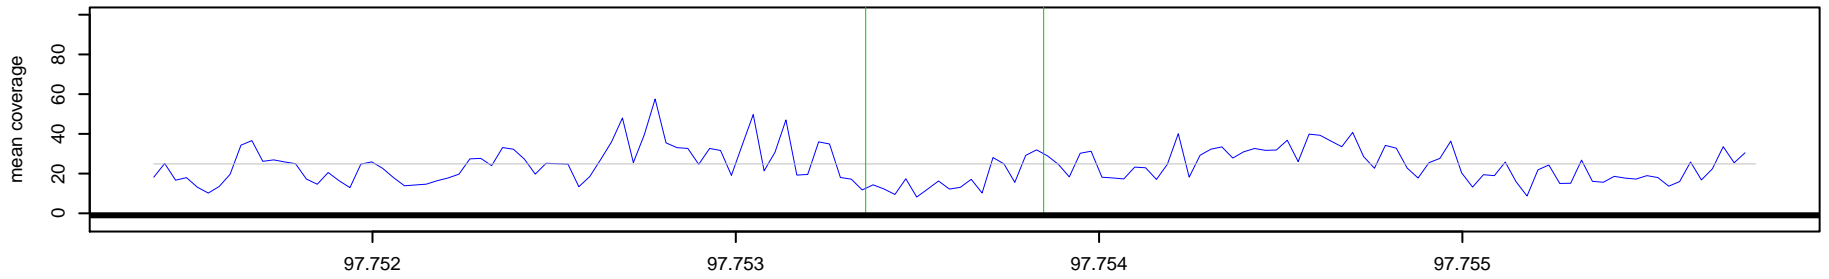

464\_NA10851 Chr 11 : 97753358 - 97753847 , 490 bp (aCGH relative log2ratio= 4.32 )

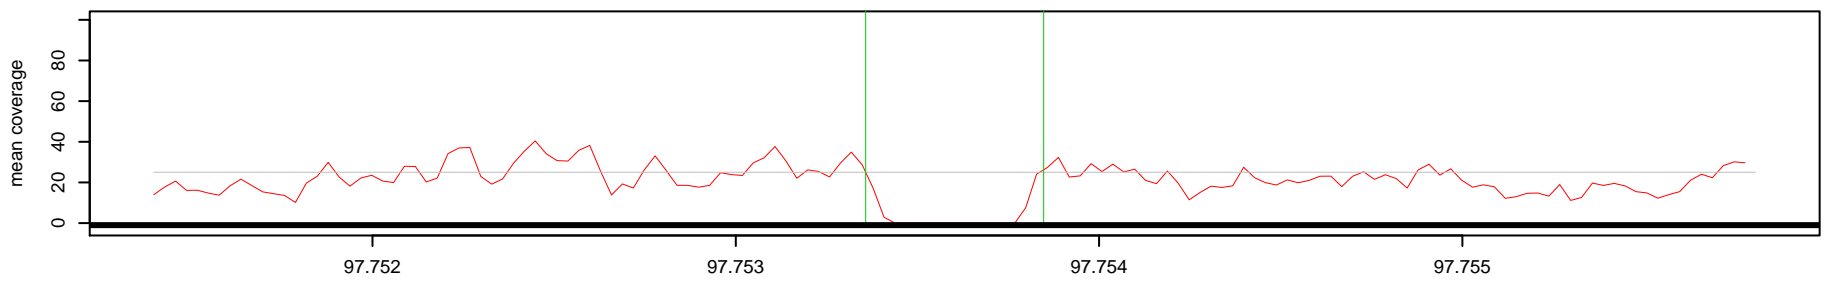

Log2( AK1 read depth / NA10851 read depth)

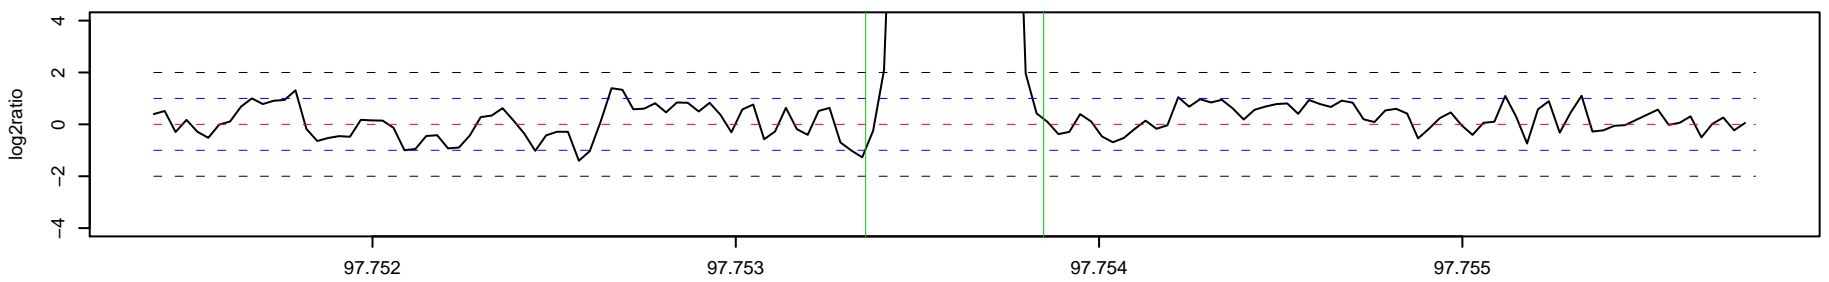

465 \_ AK1 Chr 11 : 102256275 – 102258143 , 1869 bp (aCGH relative log2ratio= 0.75 )

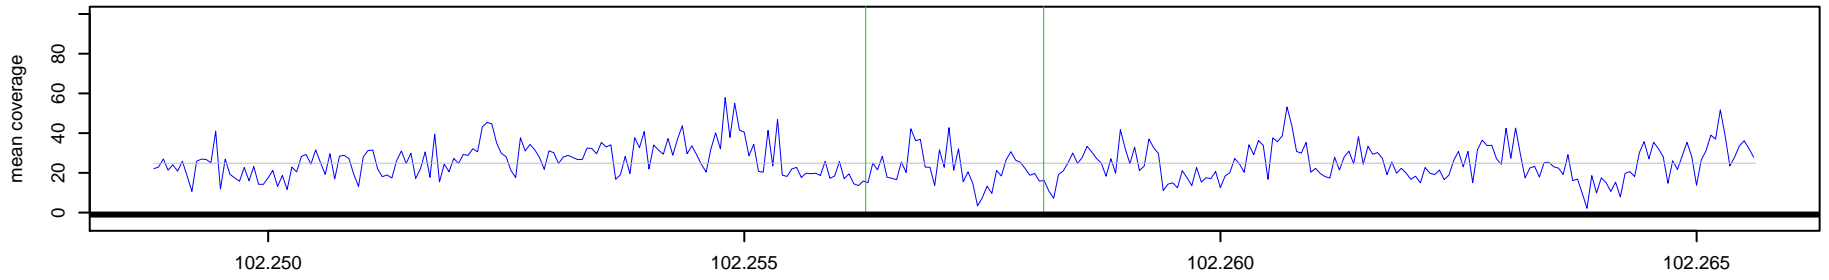

465 \_ NA10851 Chr 11 : 102256275 – 102258143 , 1869 bp (aCGH relative log2ratio= 0.75 )

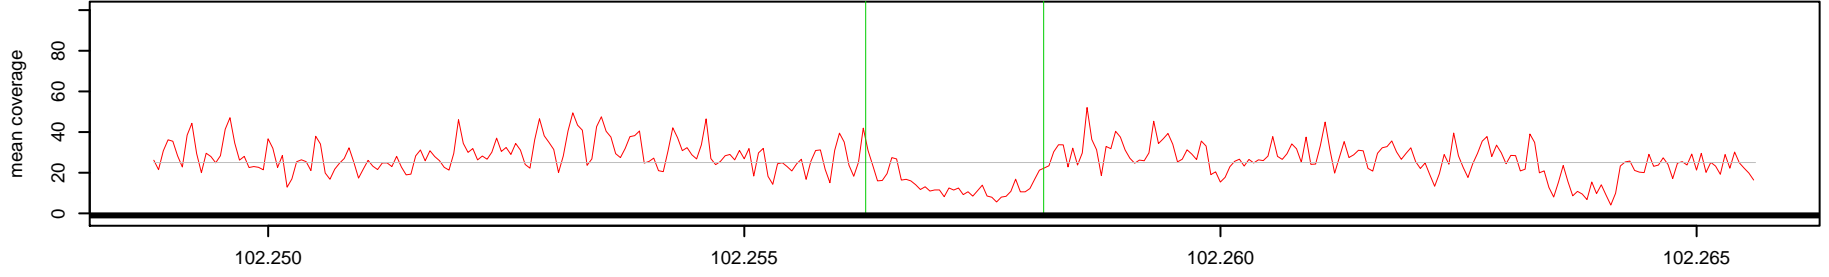

Log2( AK1 read depth / NA10851 read depth)

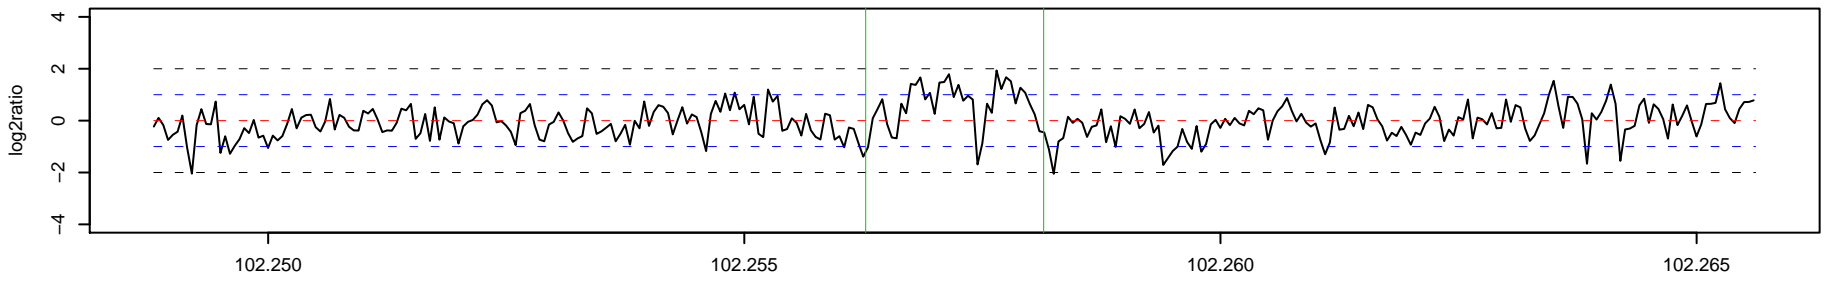

466 \_ AK1 Chr 11 : 103421590 – 103423636 , 2047 bp (aCGH relative log2ratio= -0.95 )

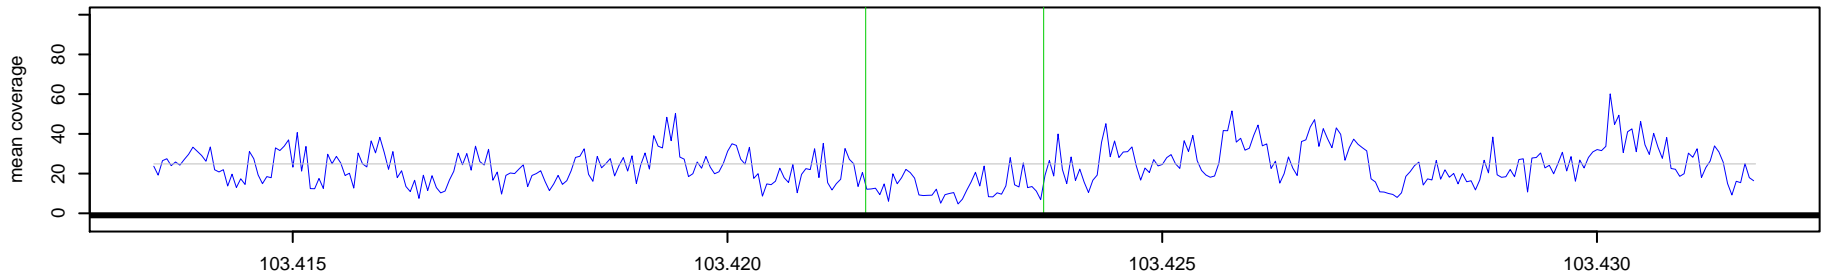

466 \_ NA10851 Chr 11 : 103421590 – 103423636 , 2047 bp (aCGH relative log2ratio= -0.95 )

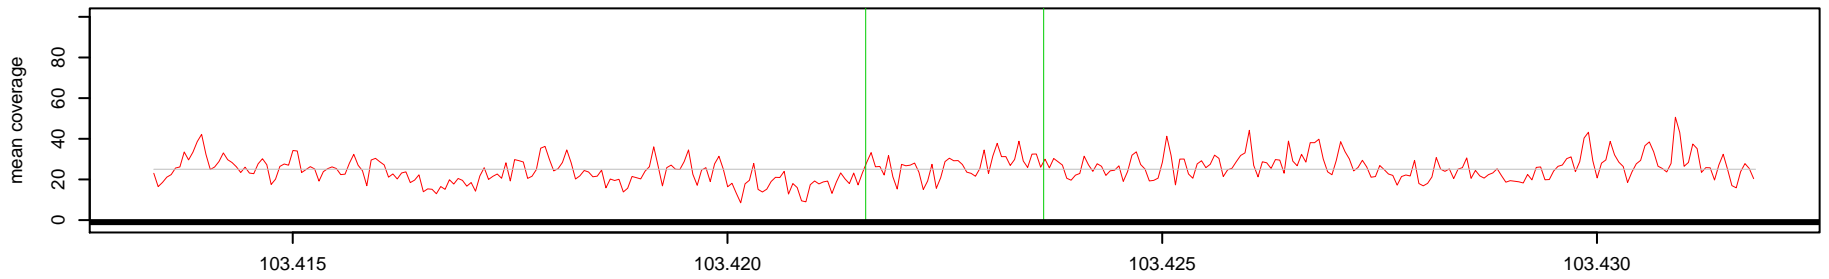

Log2( AK1 read depth / NA10851 read depth)

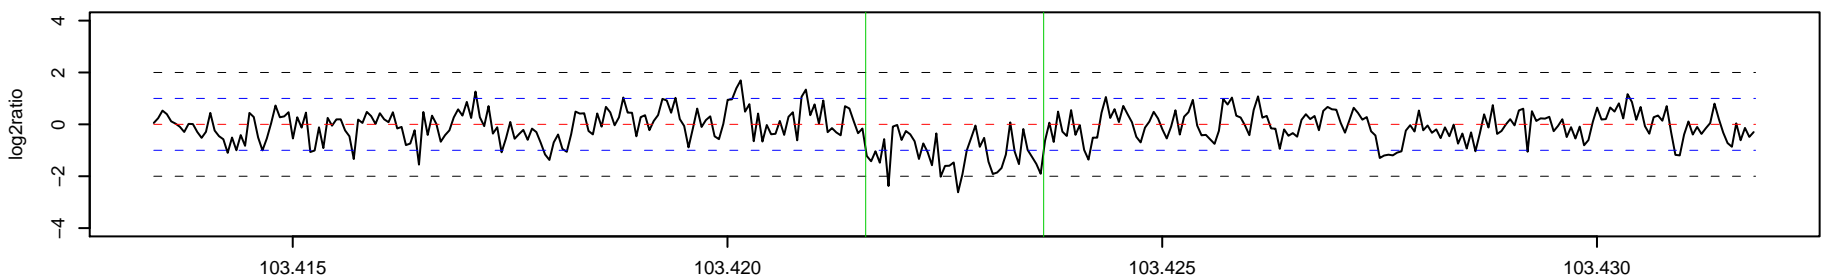

467 \_ AK1 Chr 11 : 103772966 – 103778468 , 5503 bp (aCGH relative log2ratio= -2.62 )

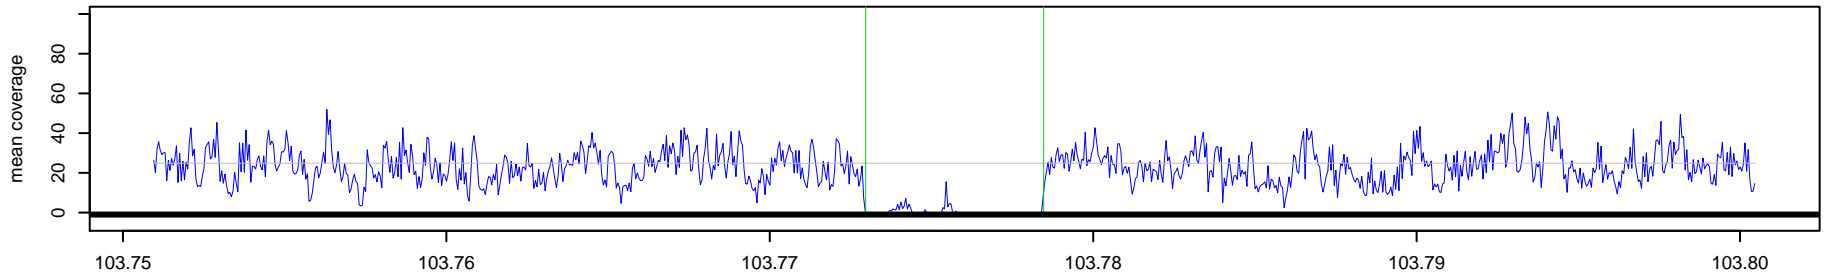

467 \_ NA10851 Chr 11 : 103772966 – 103778468 , 5503 bp (aCGH relative log2ratio= -2.62 )

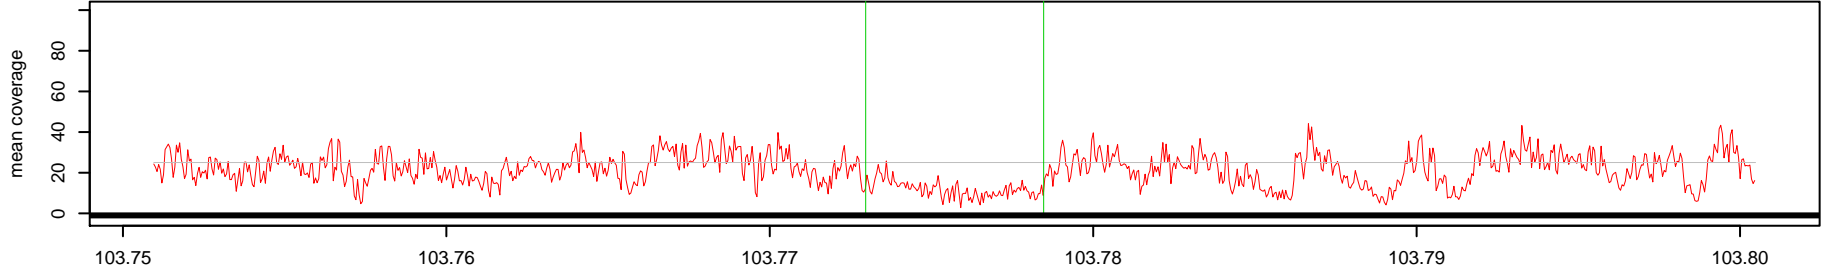

Log2( AK1 read depth / NA10851 read depth)

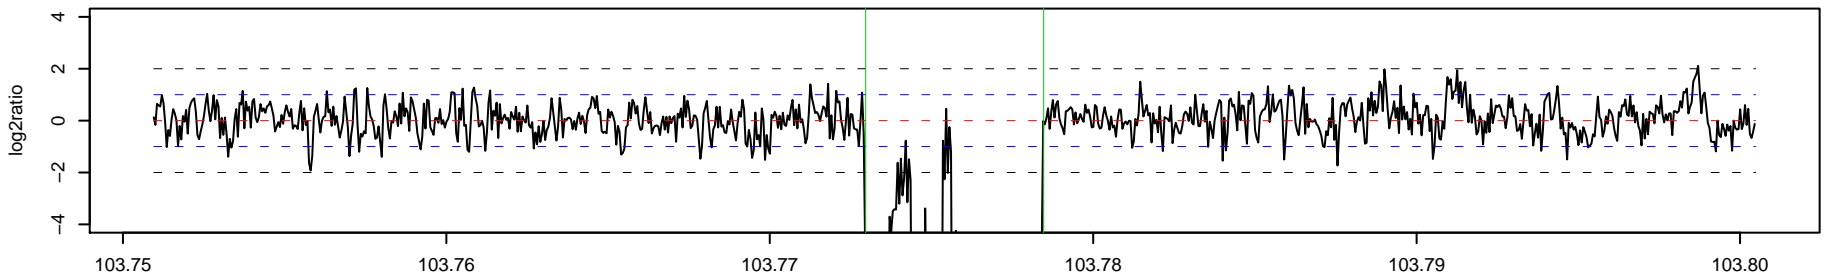

o

468 \_ AK1 Chr 11 : 107289679 – 107293565 , 3887 bp (aCGH relative log2ratio= -1.02 )

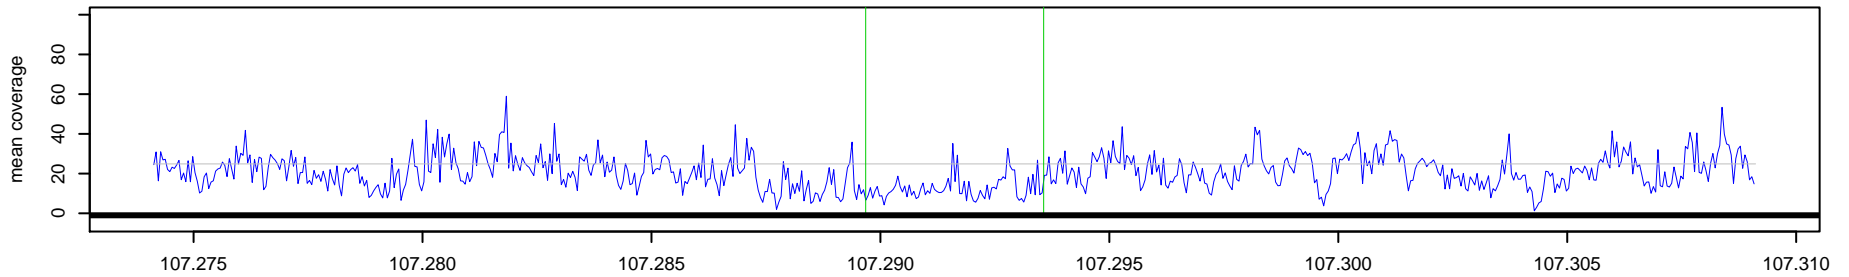

468 \_ NA10851 Chr 11 : 107289679 – 107293565 , 3887 bp (aCGH relative log2ratio= -1.02 )

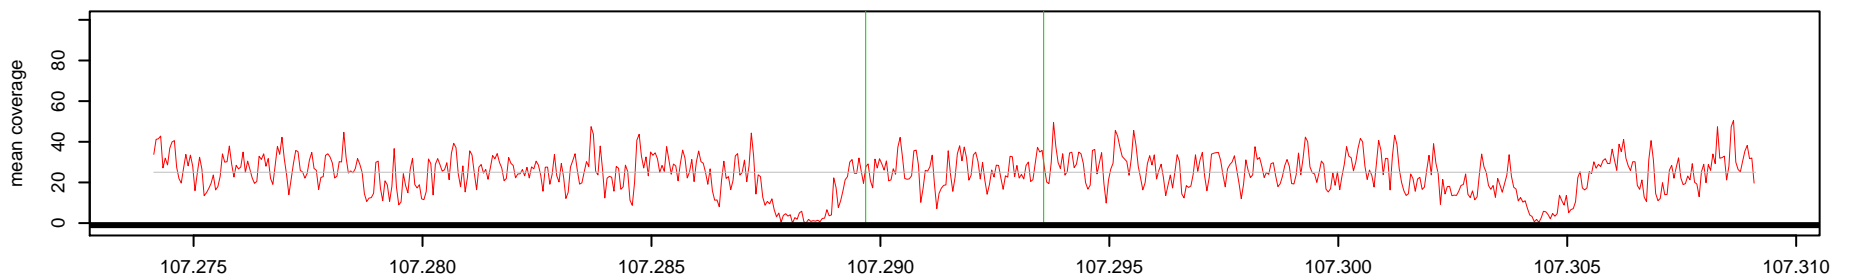

Log2( AK1 read depth / NA10851 read depth)

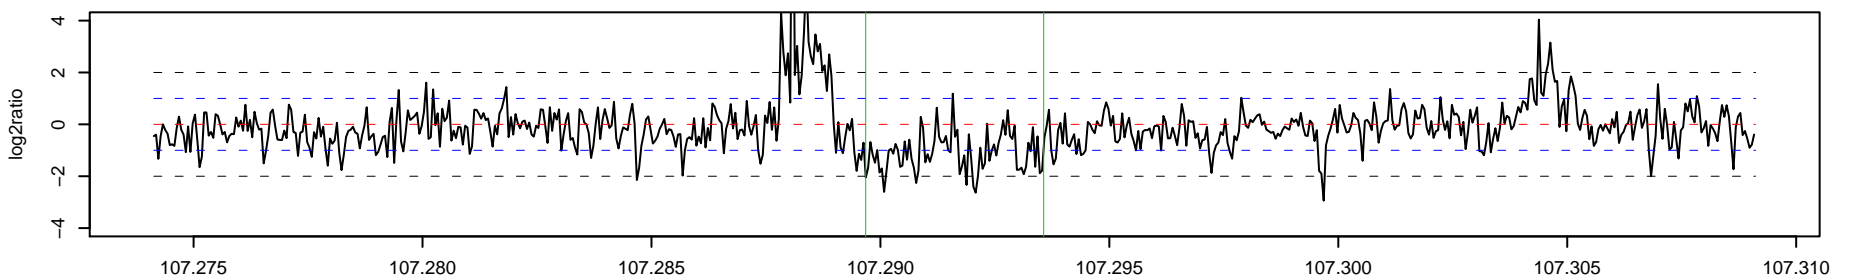

o

469\_AK1 Chr 11 : 113173562 – 113174539 , 978 bp (aCGH relative log2ratio= 0.27 )

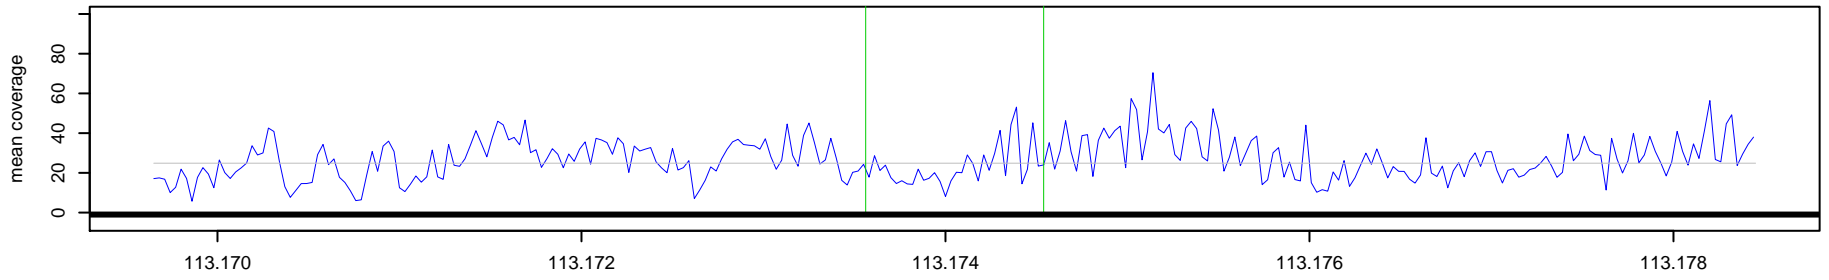

469\_NA10851 Chr 11 : 113173562 – 113174539 , 978 bp (aCGH relative log2ratio= 0.27 )

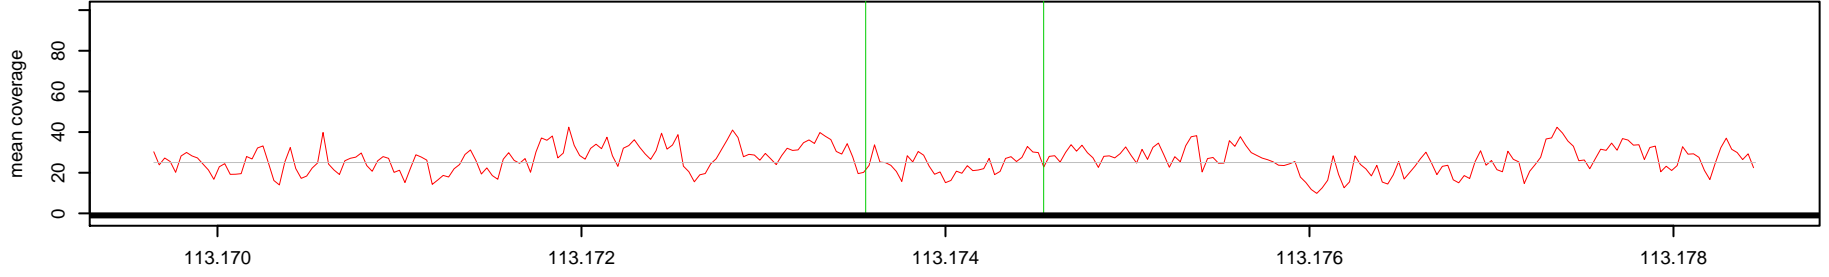

Log2( AK1 read depth / NA10851 read depth)

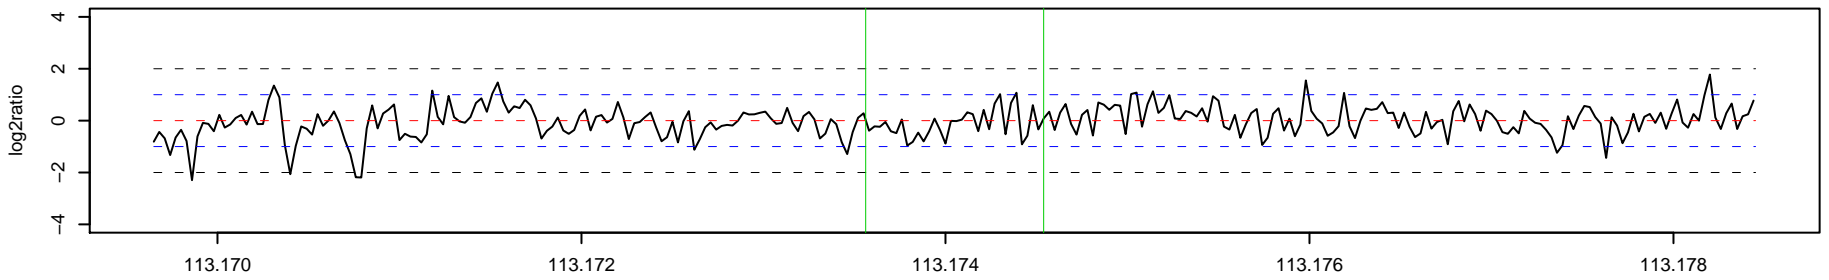

470\_AK1 Chr 11 : 121808806 – 121809279 , 474 bp (aCGH relative log2ratio= 0.63 )

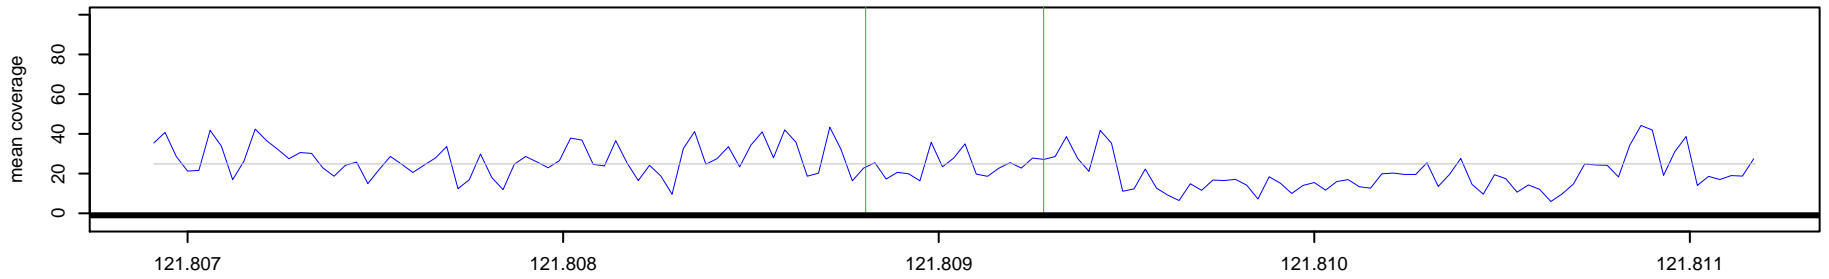

470\_NA10851 Chr 11 : 121808806 – 121809279 , 474 bp (aCGH relative log2ratio= 0.63 )

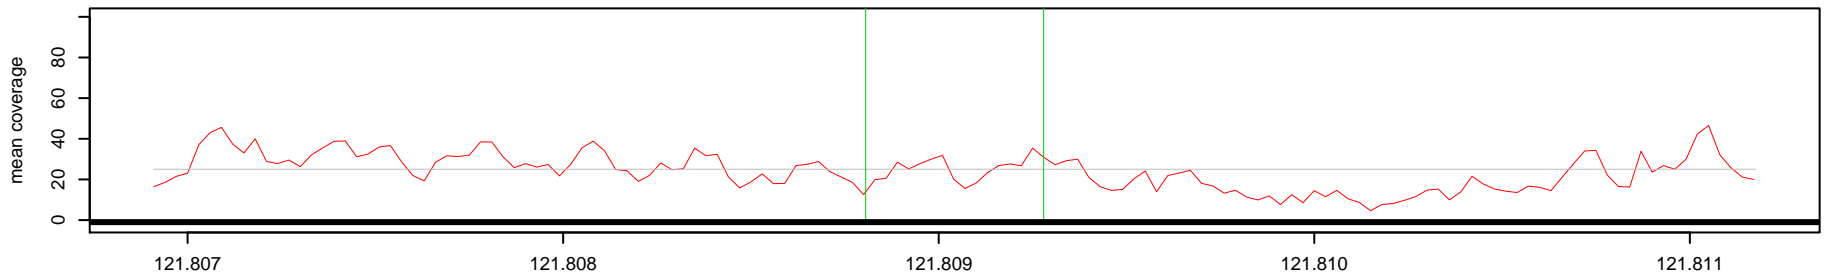

Log2( AK1 read depth / NA10851 read depth)

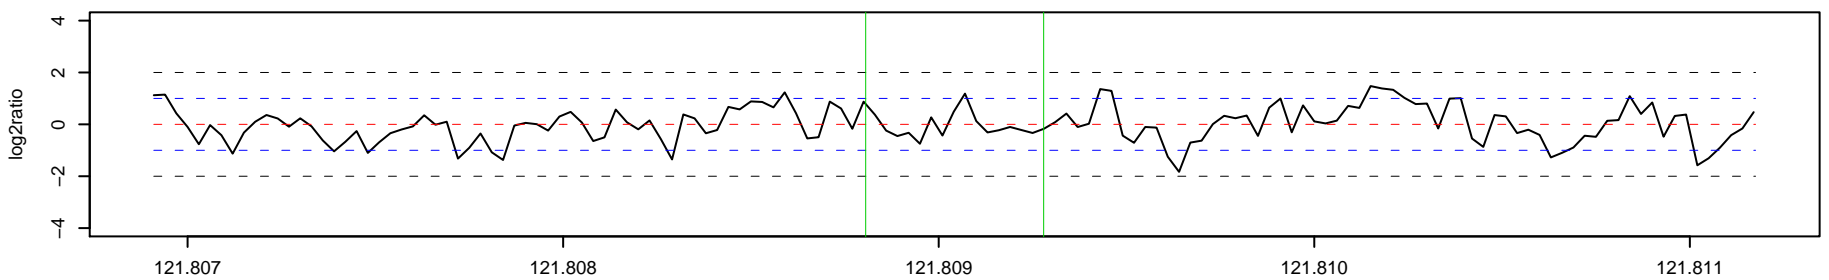

471\_AK1 Chr 11 : 127255754 – 127256494 , 741 bp (aCGH relative log2ratio= 1.02)

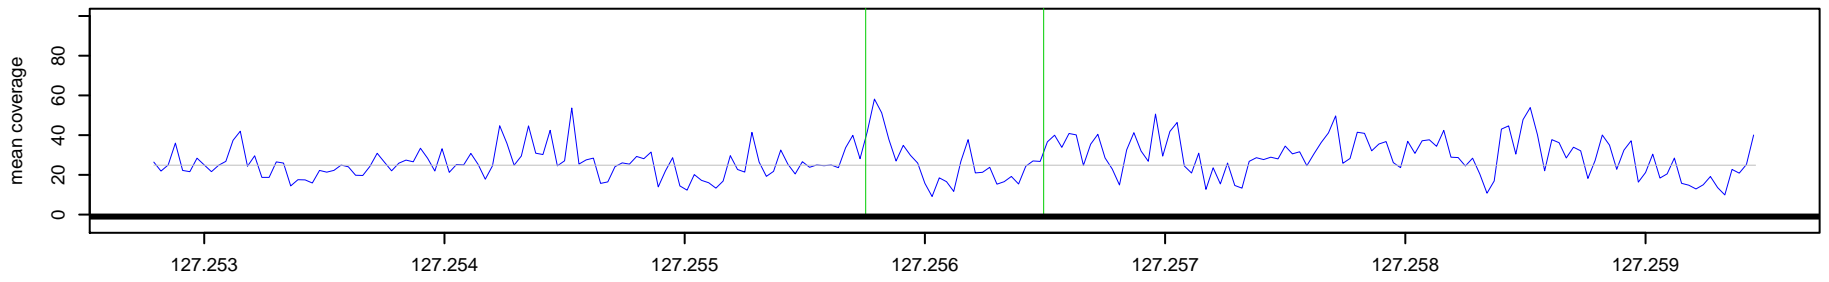

471\_NA10851 Chr 11 : 127255754 – 127256494 , 741 bp (aCGH relative log2ratio= 1.02)

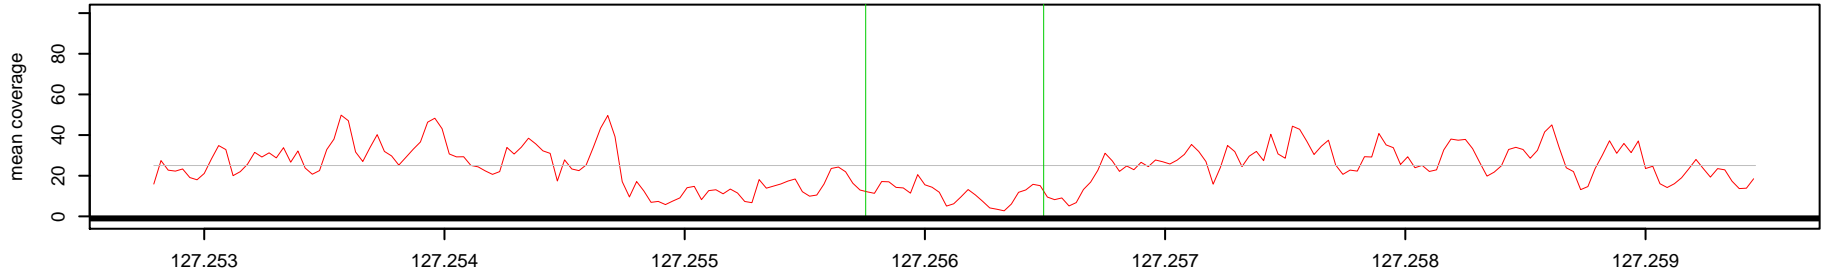

Log2( AK1 read depth / NA10851 read depth)

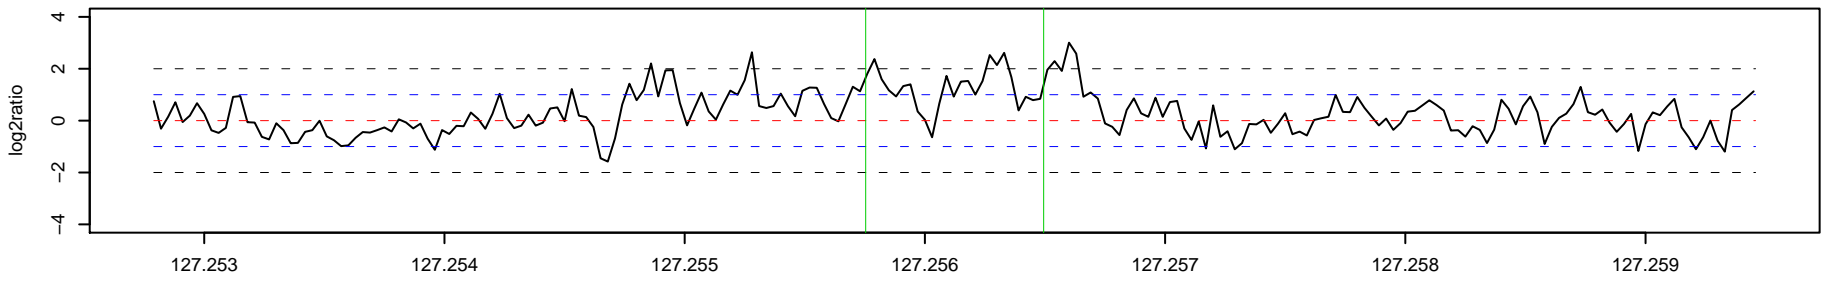

472\_AK1 Chr 11 : 128187915 – 128188594 , 680 bp (aCGH relative log2ratio= 2.83)

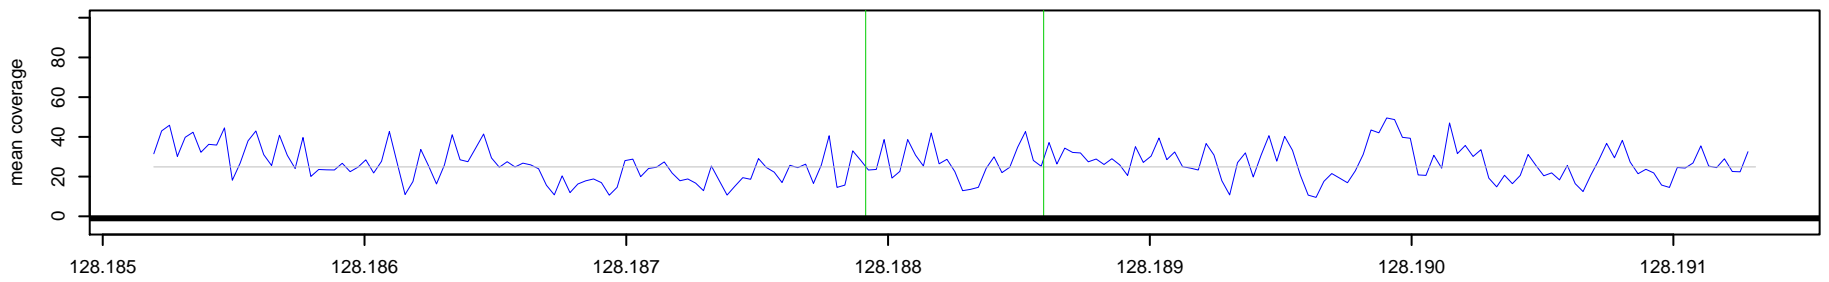

472\_NA10851 Chr 11 : 128187915 – 128188594 , 680 bp (aCGH relative log2ratio= 2.83)

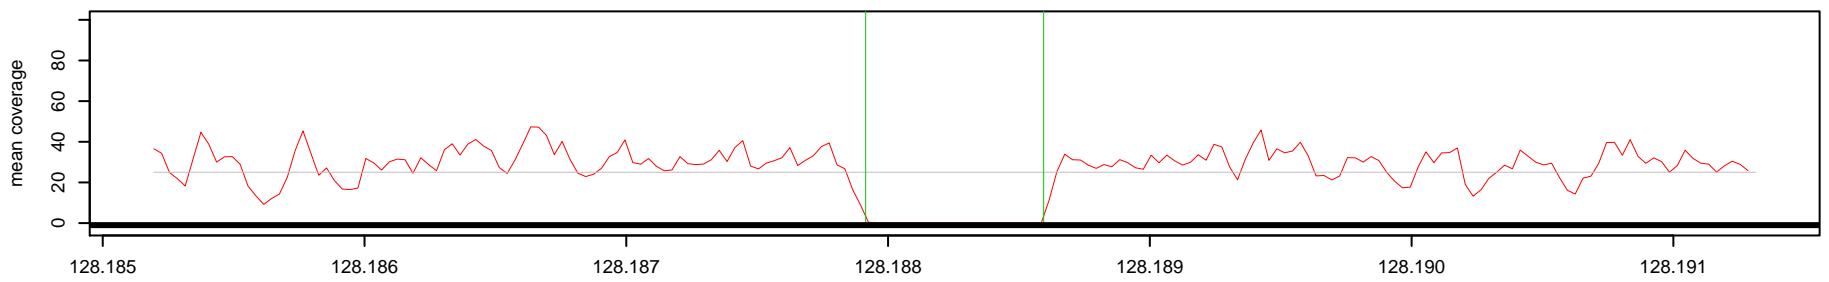

Log2( AK1 read depth / NA10851 read depth)

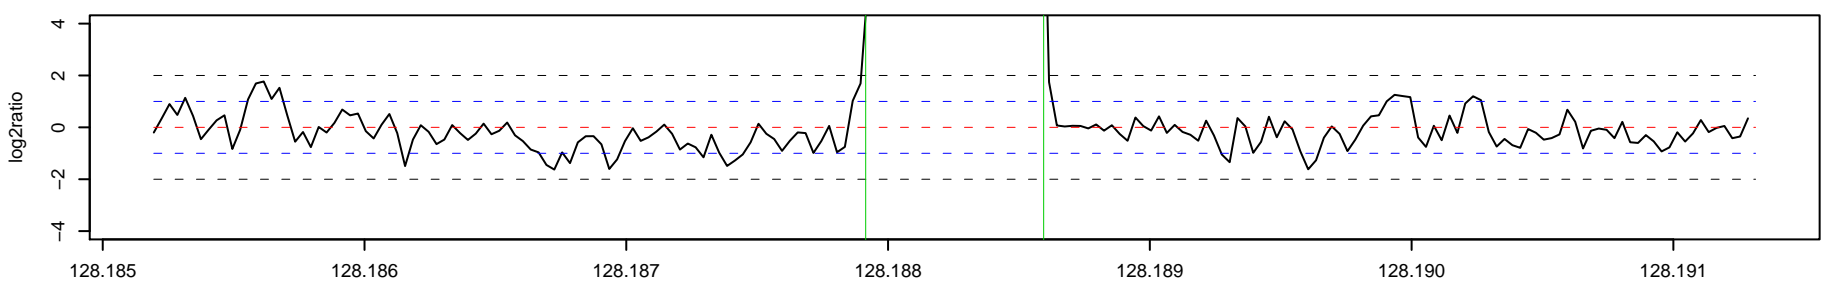



473\_AK1 Chr 11 : 134108580 – 134110210 , 1631 bp (aCGH relative log2ratio= 0.70 )

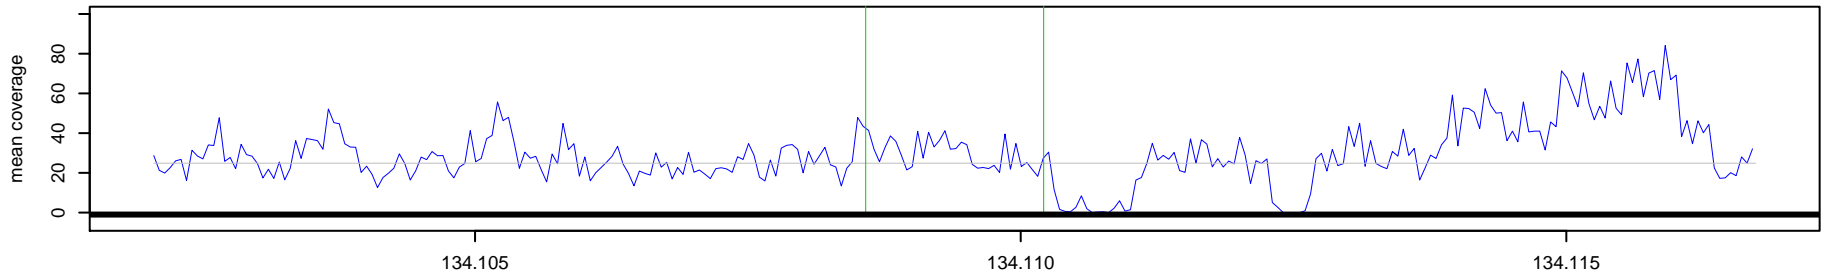

473\_NA10851 Chr 11 : 134108580 – 134110210 , 1631 bp (aCGH relative log2ratio= 0.70 )

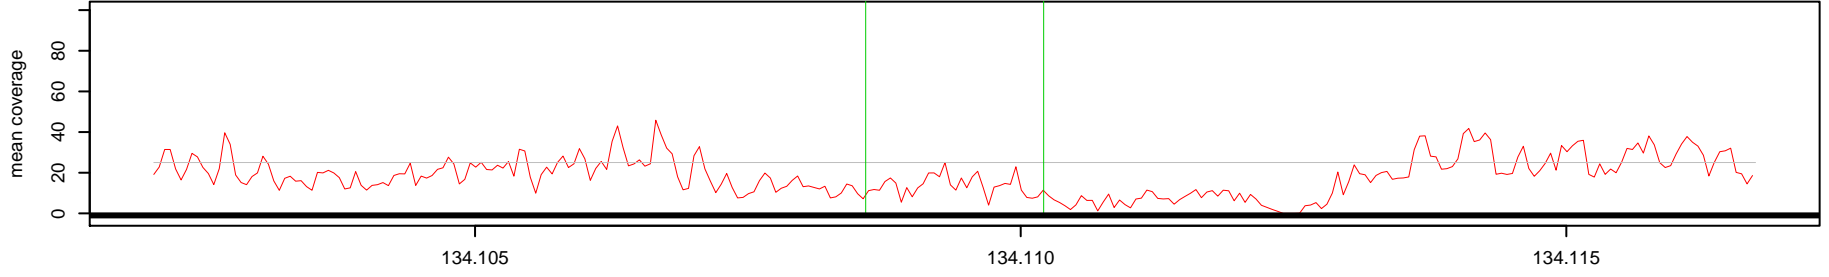

Log2( AK1 read depth / NA10851 read depth)

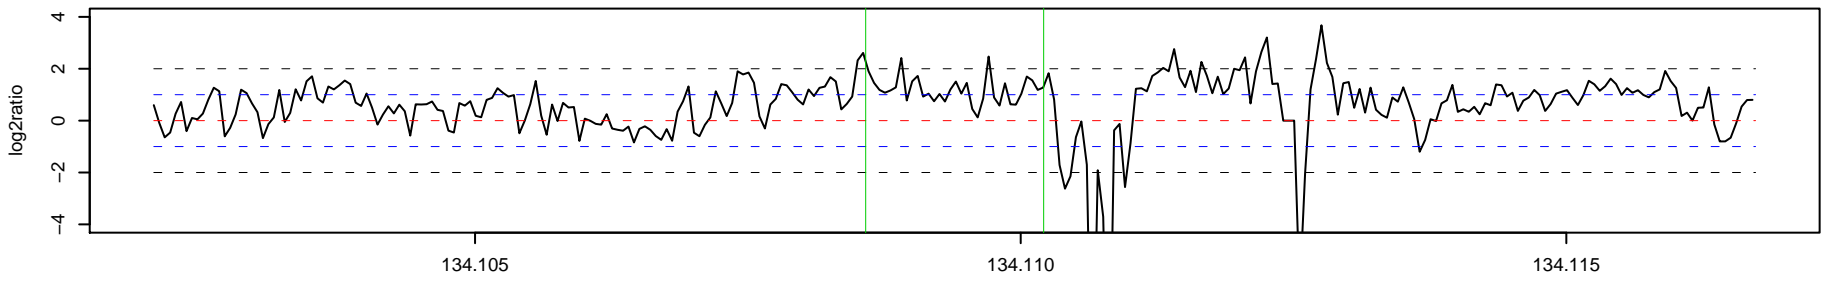

474\_AK1 Chr 12 : 737027 – 744383 , 7357 bp (aCGH relative log2ratio= 0.81 )

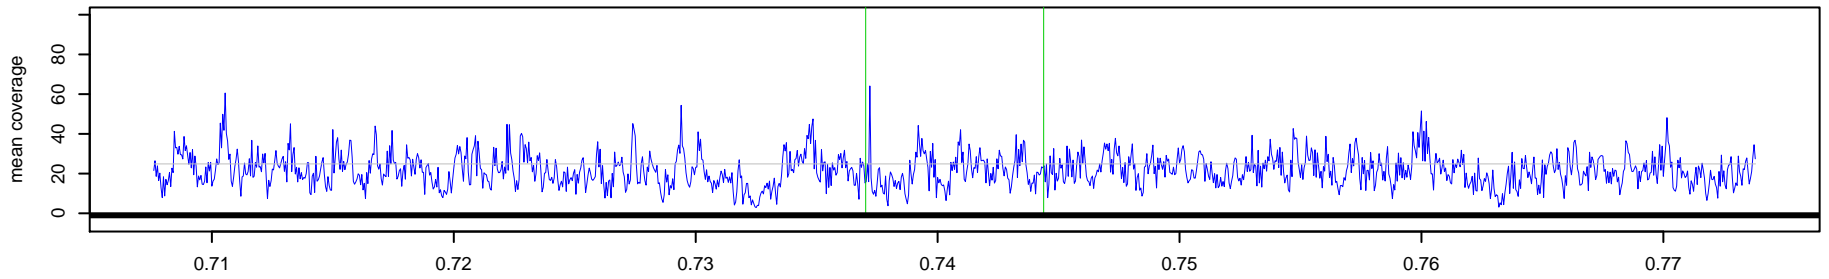

474\_NA10851 Chr 12 : 737027 – 744383 , 7357 bp (aCGH relative log2ratio= 0.81 )

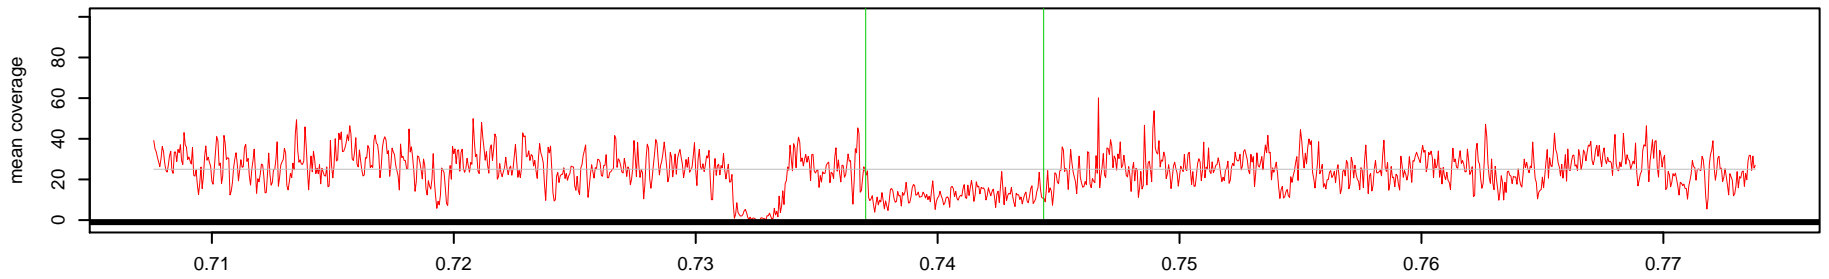

Log2( AK1 read depth / NA10851 read depth)

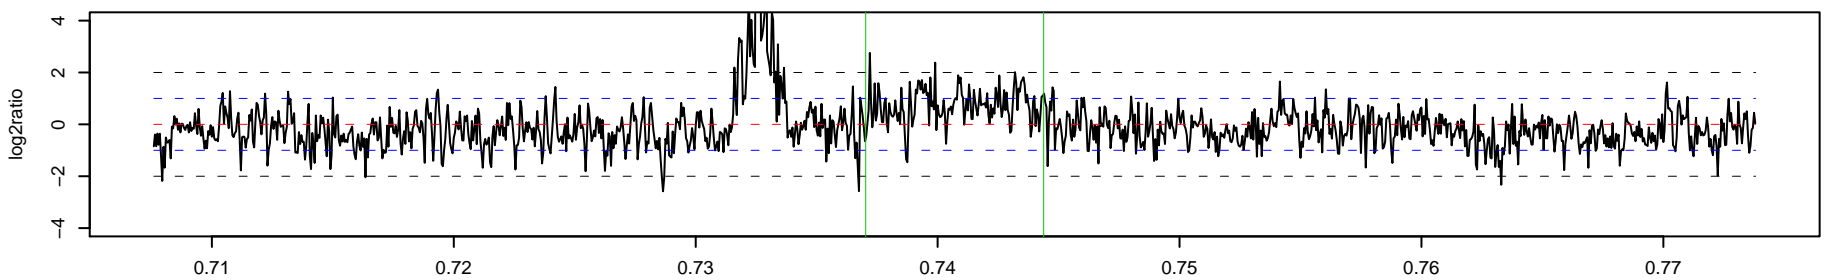

475\_AK1 Chr 12 : 1235818 - 1236472 , 655 bp (aCGH relative log2ratio= 0.88 )

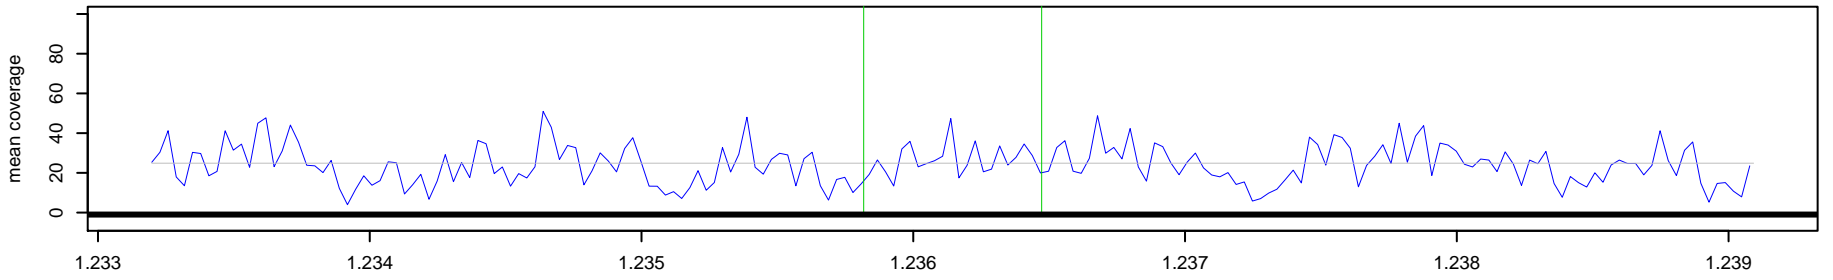

475\_NA10851 Chr 12 : 1235818 - 1236472 , 655 bp (aCGH relative log2ratio= 0.88 )

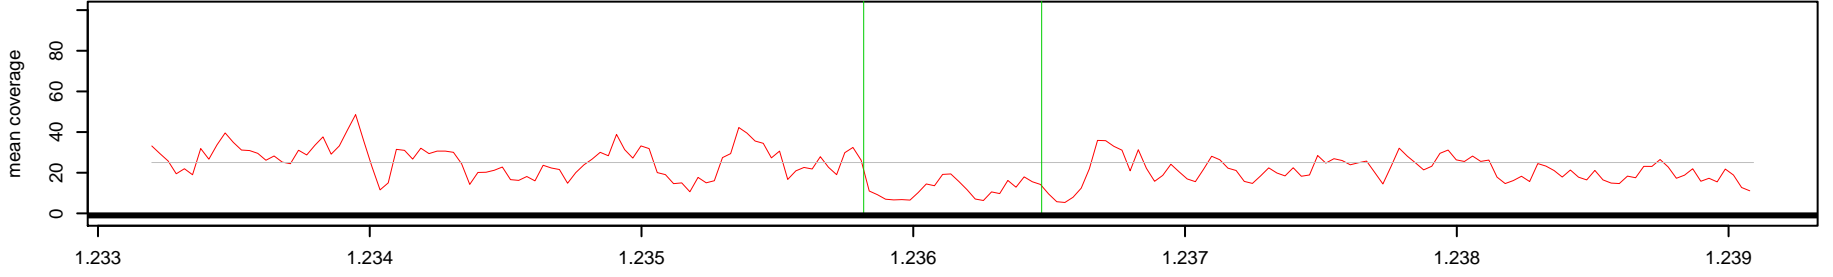

Log2( AK1 read depth / NA10851 read depth)

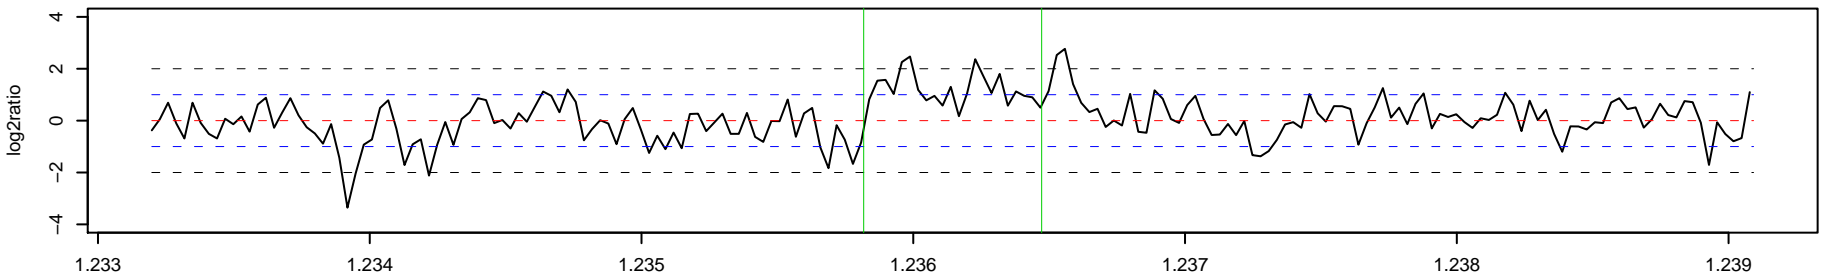

o

476\_AK1 Chr 12 : 1308210 - 1308917 , 708 bp (aCGH relative log2ratio= 1.90 )

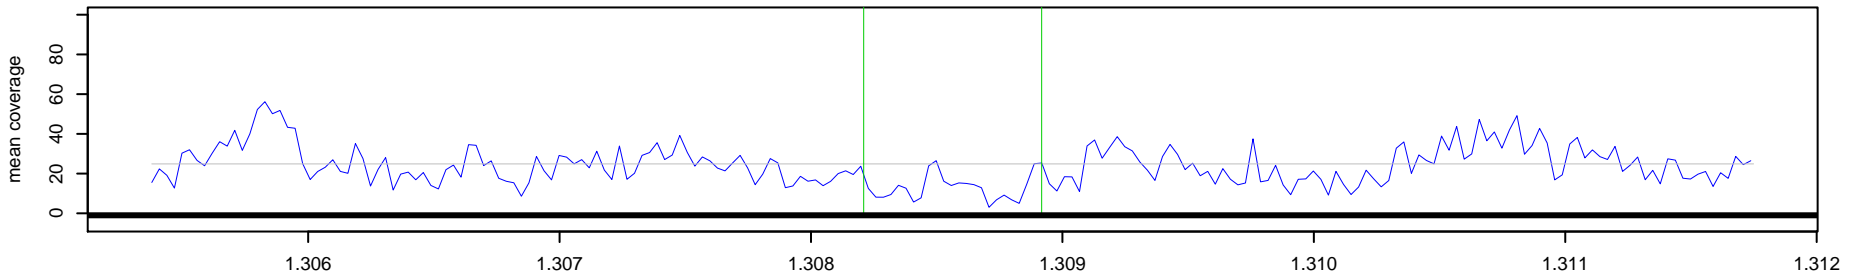

476\_NA10851 Chr 12 : 1308210 - 1308917 , 708 bp (aCGH relative log2ratio= 1.90 )

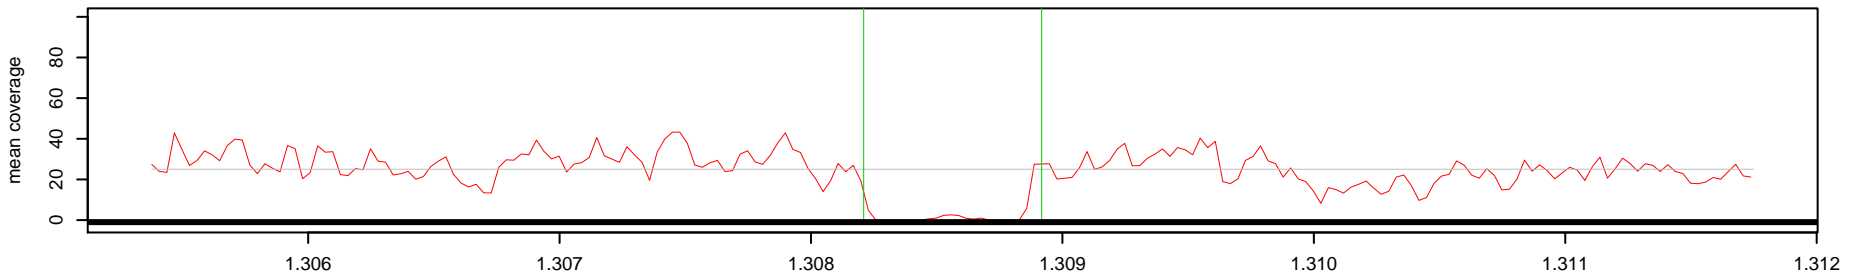

Log2( AK1 read depth / NA10851 read depth)

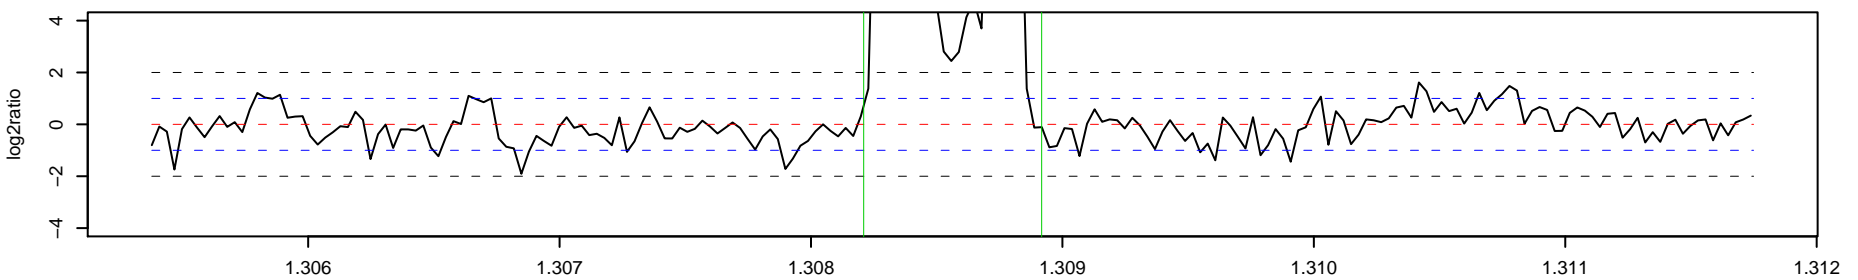

o

477\_AK1 Chr 12 : 2116530 – 2128079 , 11550 bp (aCGH relative log2ratio= 0.52 )

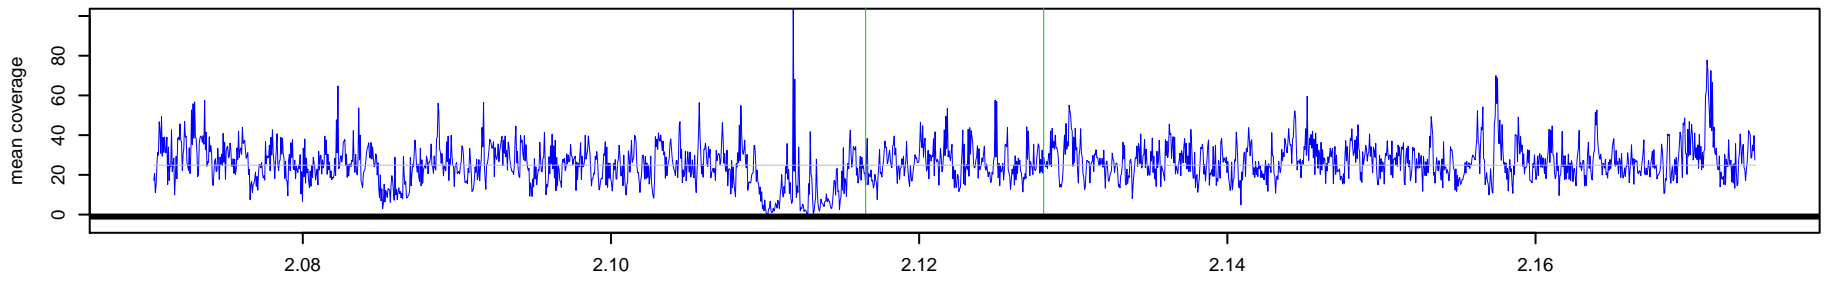

477\_NA10851 Chr 12 : 2116530 – 2128079 , 11550 bp (aCGH relative log2ratio= 0.52 )

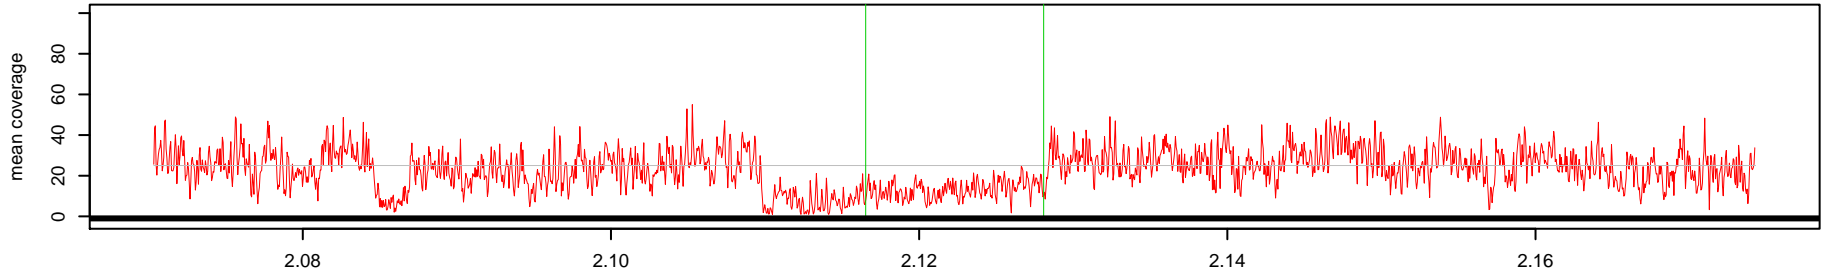

Log2( AK1 read depth / NA10851 read depth)

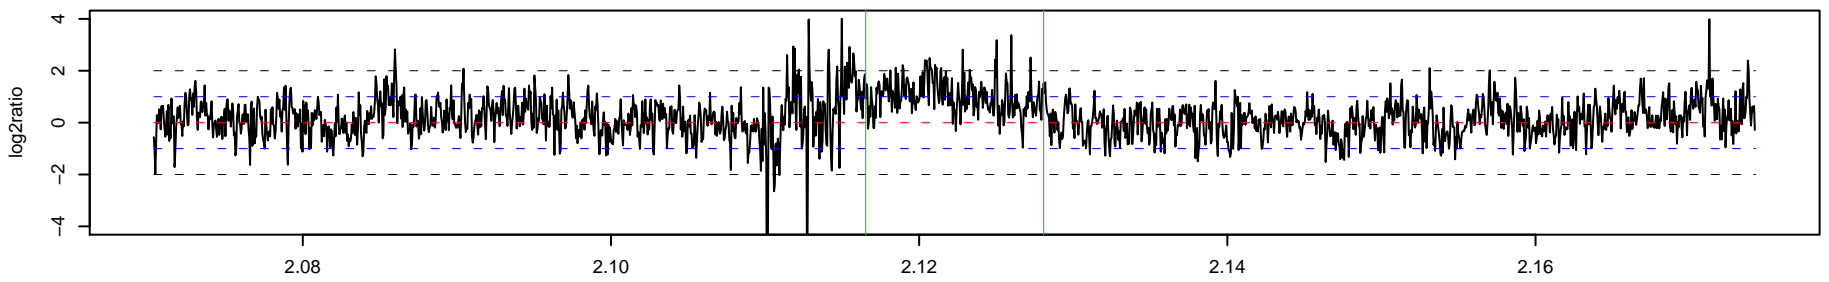

478\_AK1 Chr 12 : 5092118 – 5093801 , 1684 bp (aCGH relative log2ratio= 0.41 )

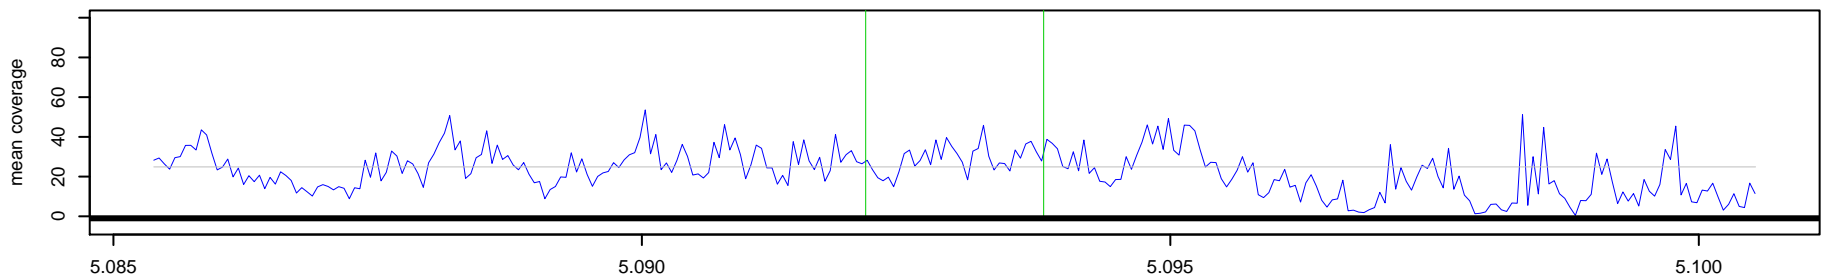

478\_NA10851 Chr 12 : 5092118 – 5093801 , 1684 bp (aCGH relative log2ratio= 0.41 )

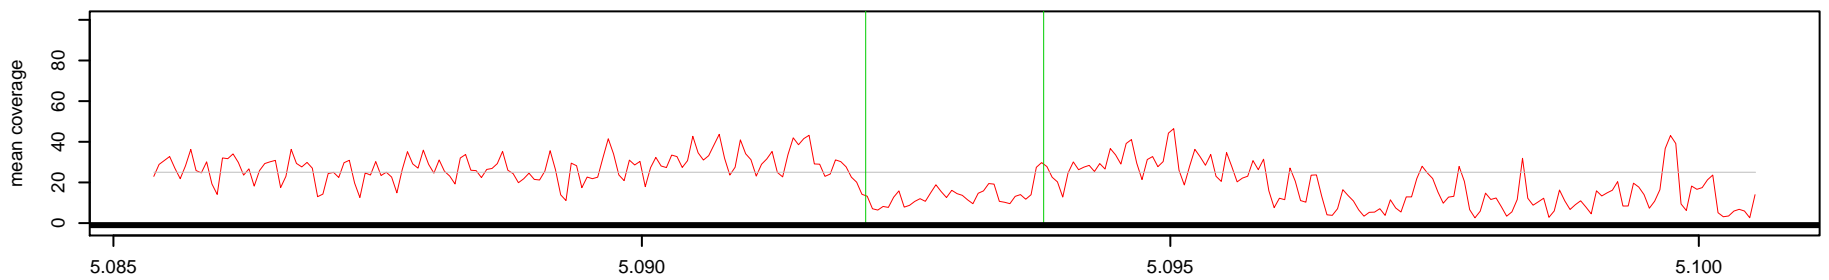

Log2( AK1 read depth / NA10851 read depth)

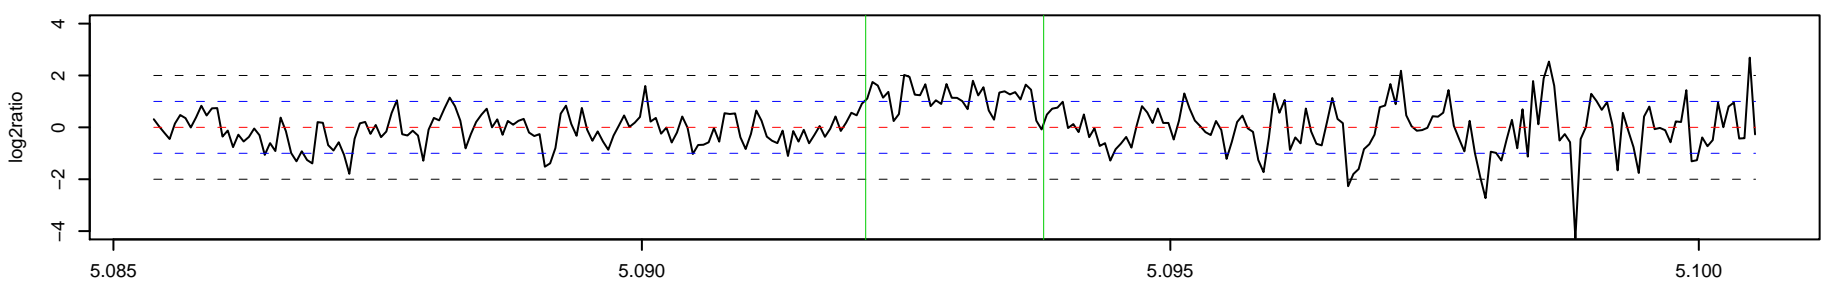

479\_AK1 Chr 12 : 6108046 – 6116165 , 8120 bp (aCGH relative log2ratio= 0.30 )

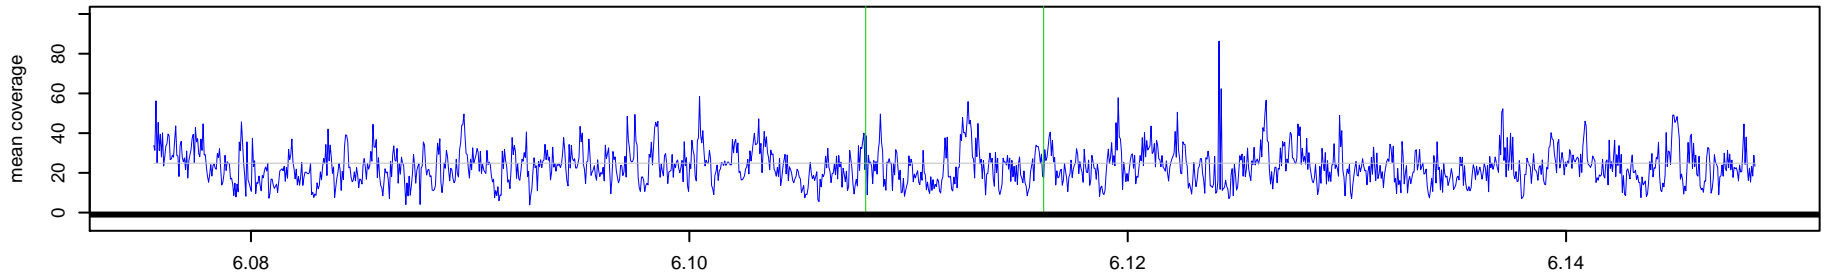

479\_NA10851 Chr 12 : 6108046 – 6116165 , 8120 bp (aCGH relative log2ratio= 0.30 )

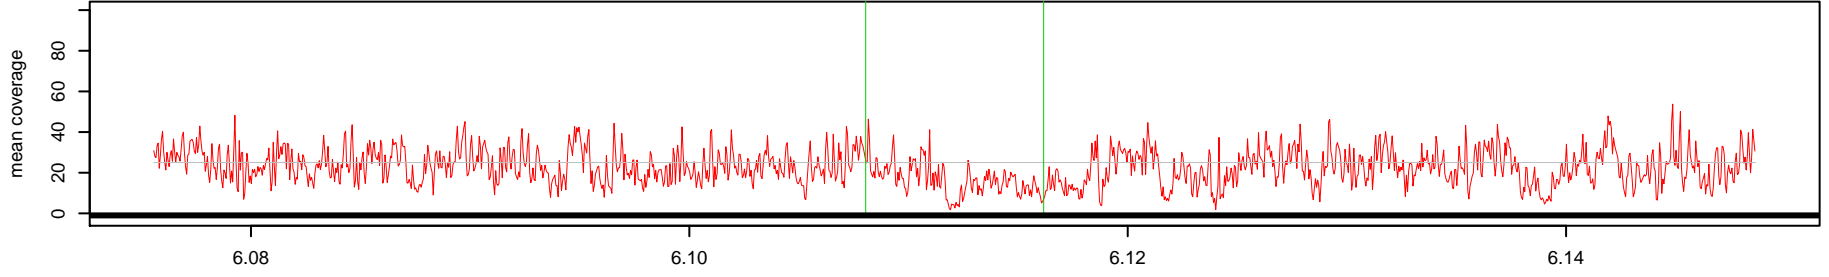

Log2( AK1 read depth / NA10851 read depth)

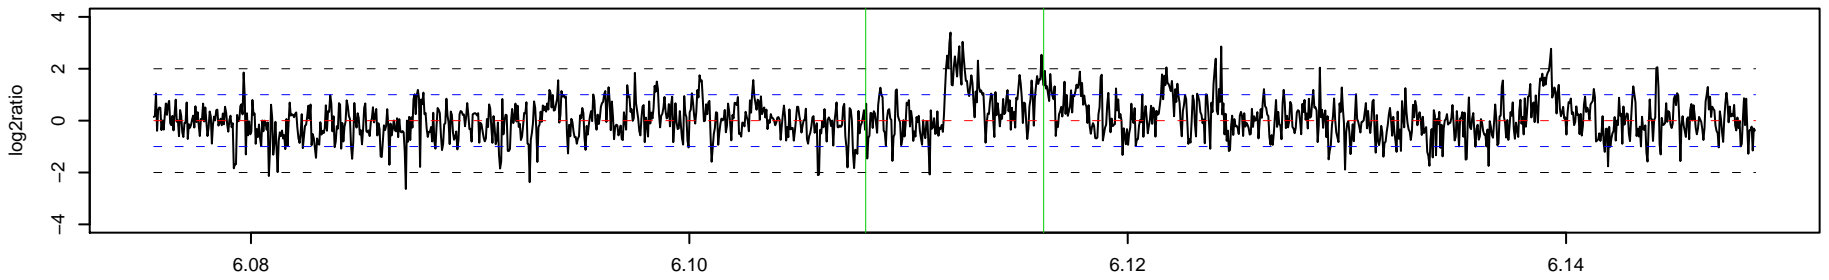

o

o

480\_AK1 Chr 12 : 7530059 – 7532230 , 2172 bp (aCGH relative log2ratio= -0.22 )

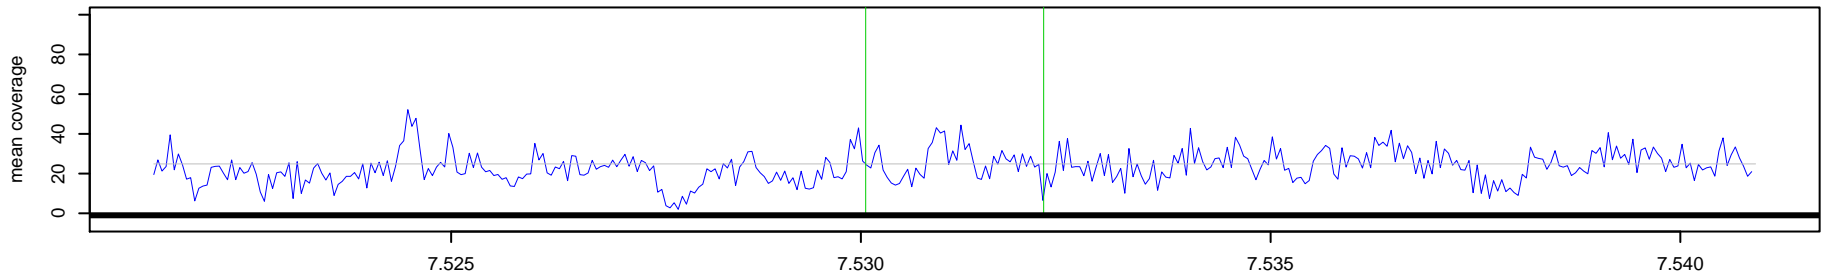

480\_NA10851 Chr 12 : 7530059 – 7532230 , 2172 bp (aCGH relative log2ratio= -0.22 )

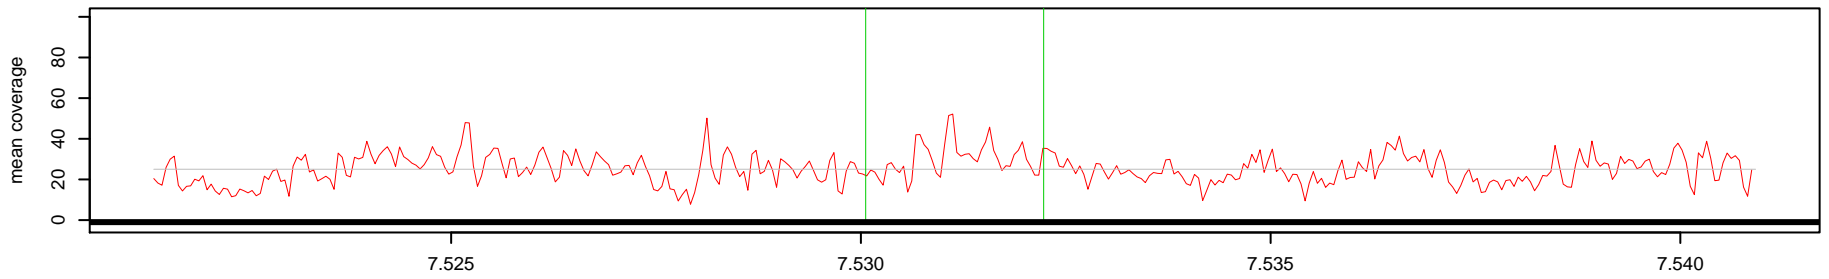

Log2( AK1 read depth / NA10851 read depth)

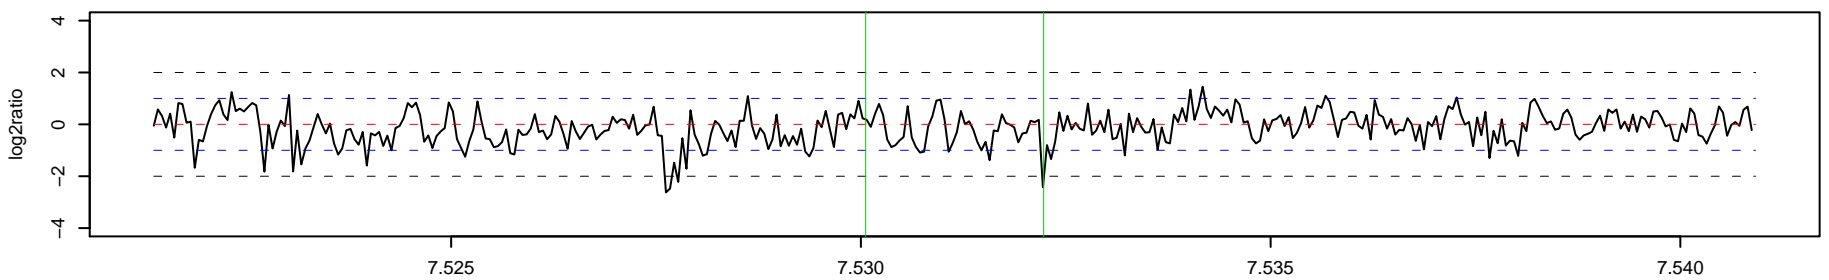

481\_AK1 Chr 12 : 9523980 - 9610254 , 86275 bp (aCGH relative log2ratio= 1.19 )

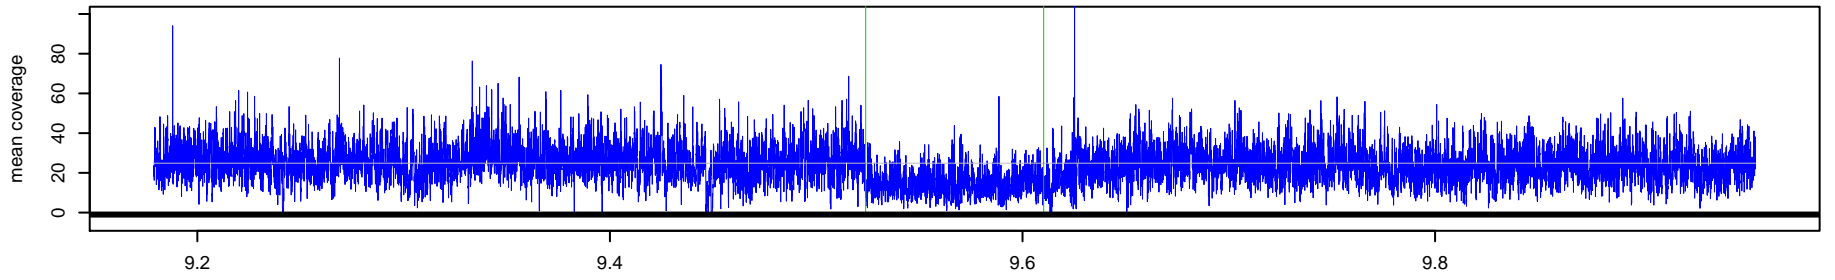

481\_NA10851 Chr 12 : 9523980 - 9610254 , 86275 bp (aCGH relative log2ratio= 1.19 )

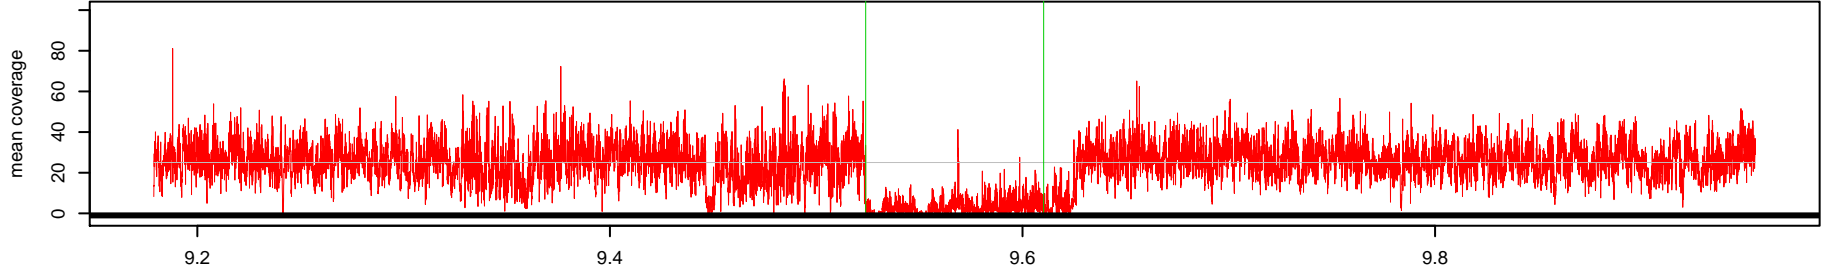

Log2( AK1 read depth / NA10851 read depth)

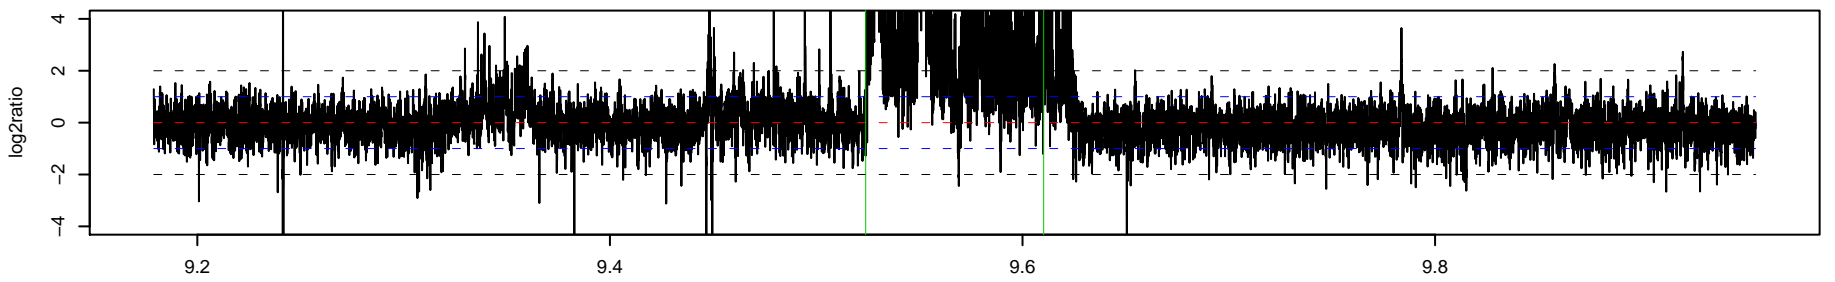

482\_AK1 Chr 12 : 11917696 - 11918190 , 495 bp (aCGH relative log2ratio= -2.28 )

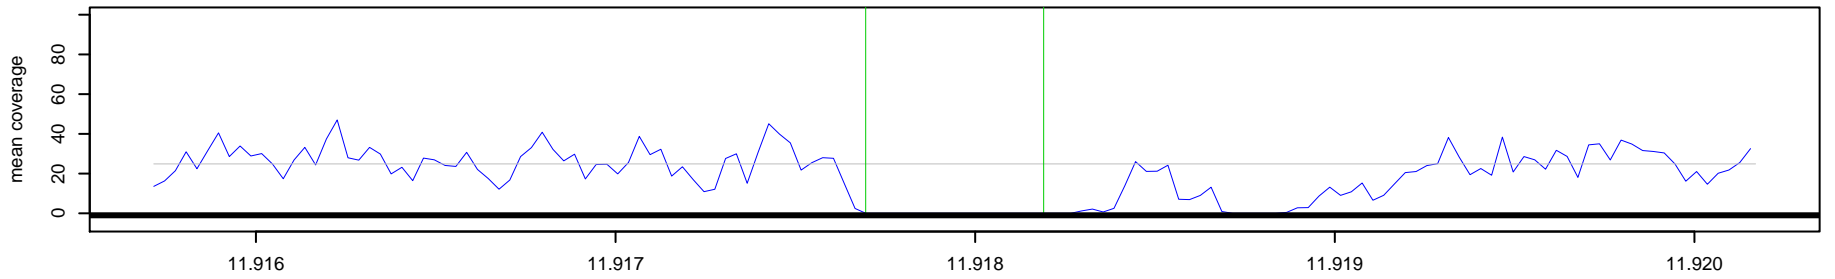

482\_NA10851 Chr 12 : 11917696 - 11918190 , 495 bp (aCGH relative log2ratio= -2.28 )

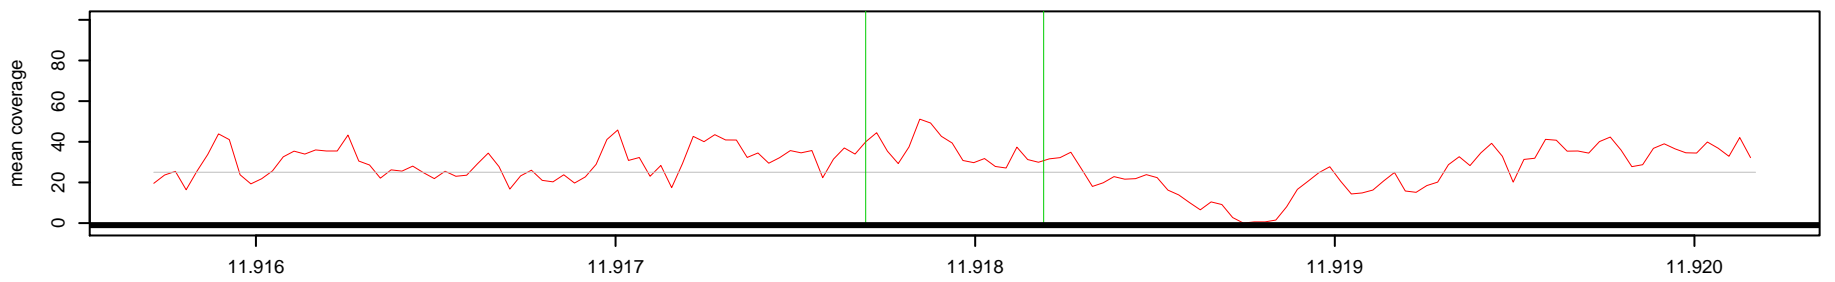

Log2( AK1 read depth / NA10851 read depth)

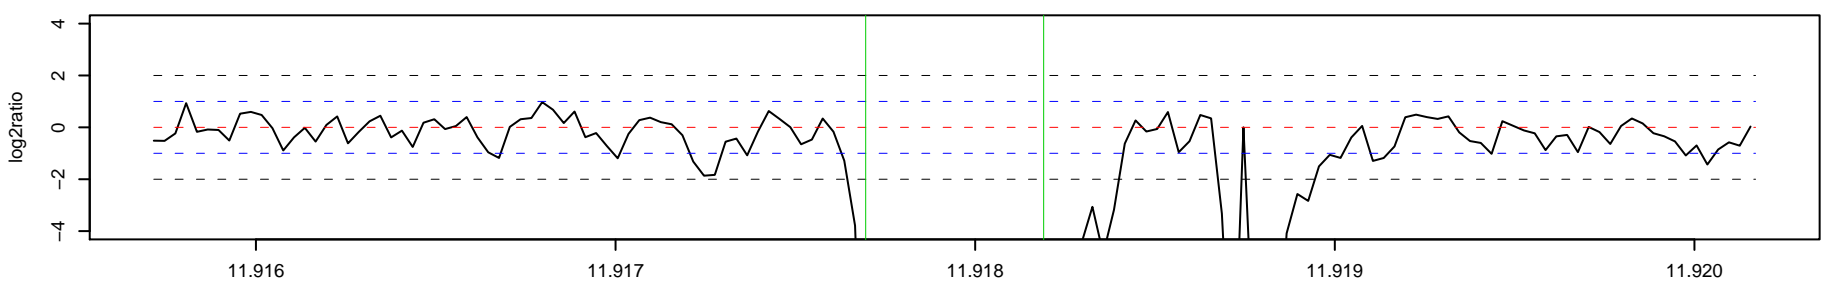

483\_AK1 Chr 12 : 17335963 – 17337229 , 1267 bp (aCGH relative log2ratio= 0.90 )

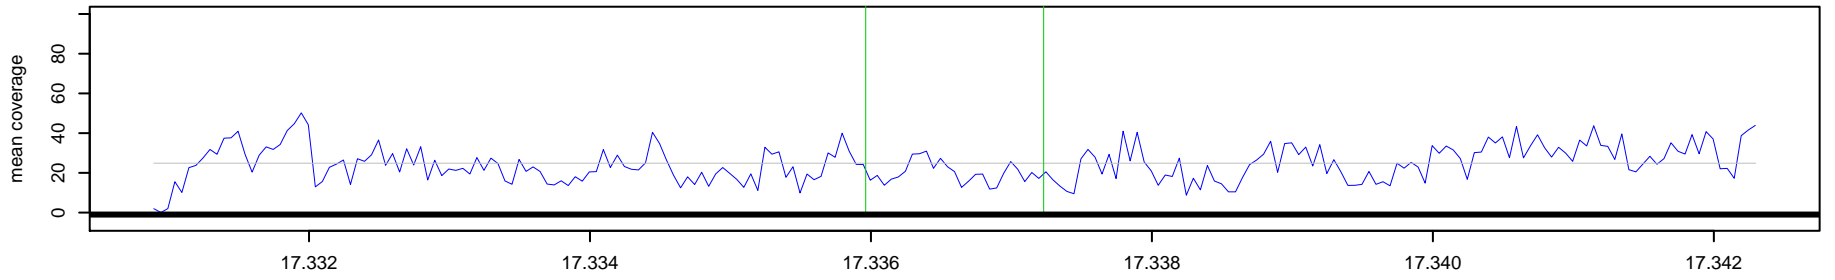

483\_NA10851 Chr 12 : 17335963 – 17337229 , 1267 bp (aCGH relative log2ratio= 0.90 )

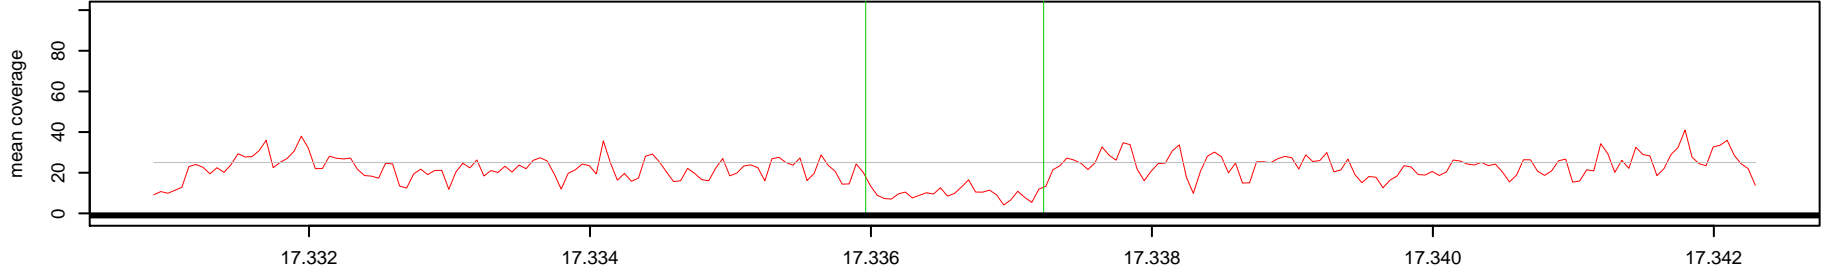

Log2( AK1 read depth / NA10851 read depth)

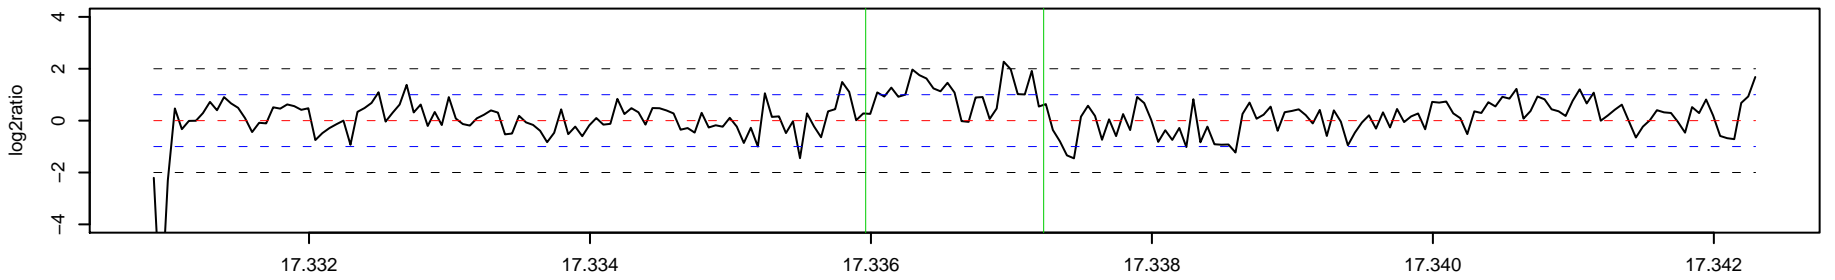

484\_AK1 Chr 12 : 17769723 – 17776956 , 7234 bp (aCGH relative log2ratio= 0.47 )

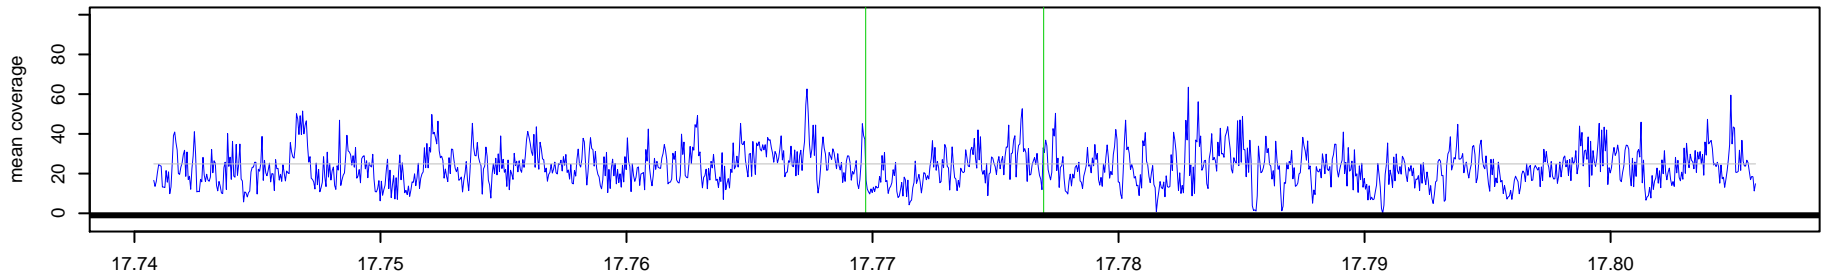

484\_NA10851 Chr 12 : 17769723 – 17776956 , 7234 bp (aCGH relative log2ratio= 0.47 )

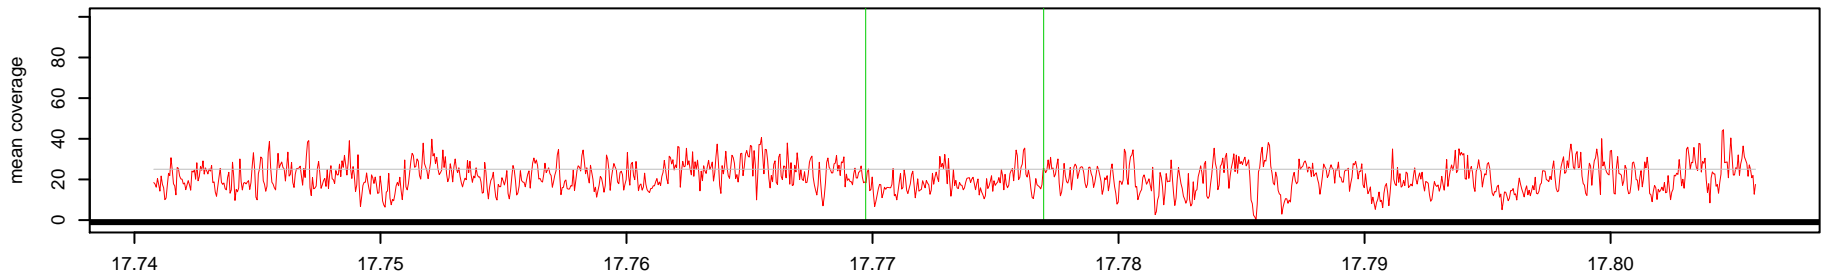

Log2( AK1 read depth / NA10851 read depth)

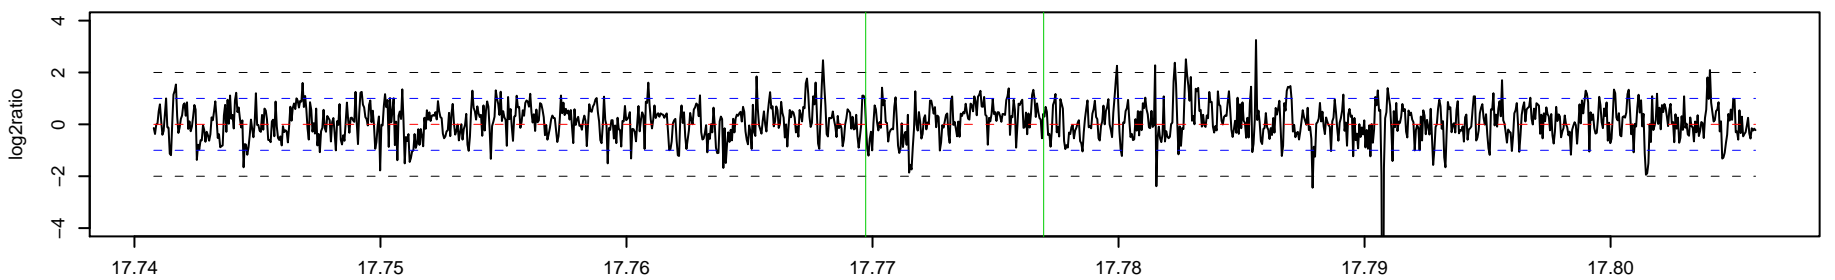

485\_AK1 Chr 12 : 30369597 – 30370203 , 607 bp (aCGH relative log2ratio= 3.58 )

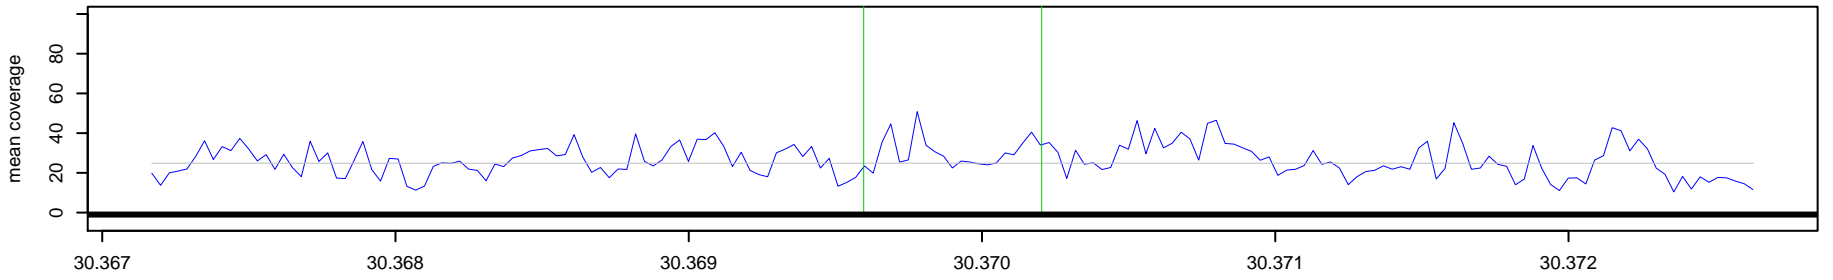

485\_NA10851 Chr 12 : 30369597 – 30370203 , 607 bp (aCGH relative log2ratio= 3.58 )

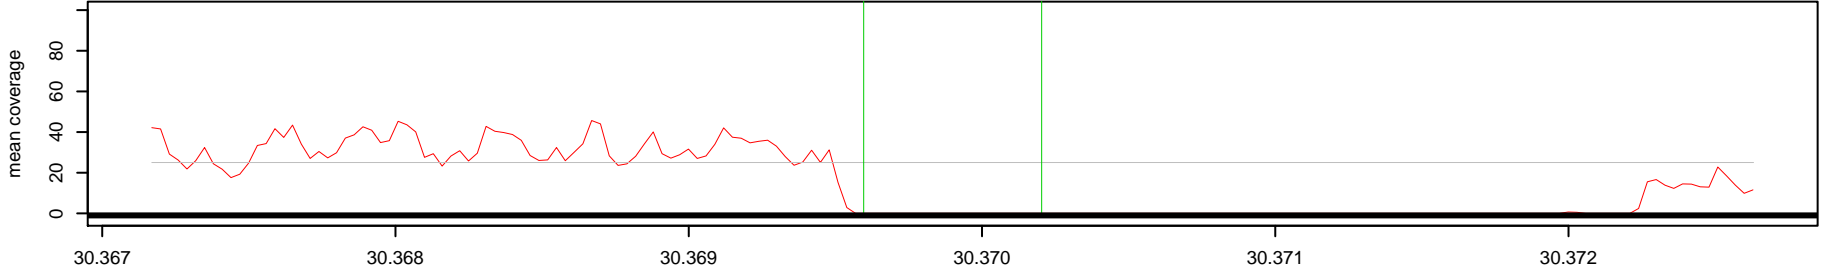

Log2( AK1 read depth / NA10851 read depth)

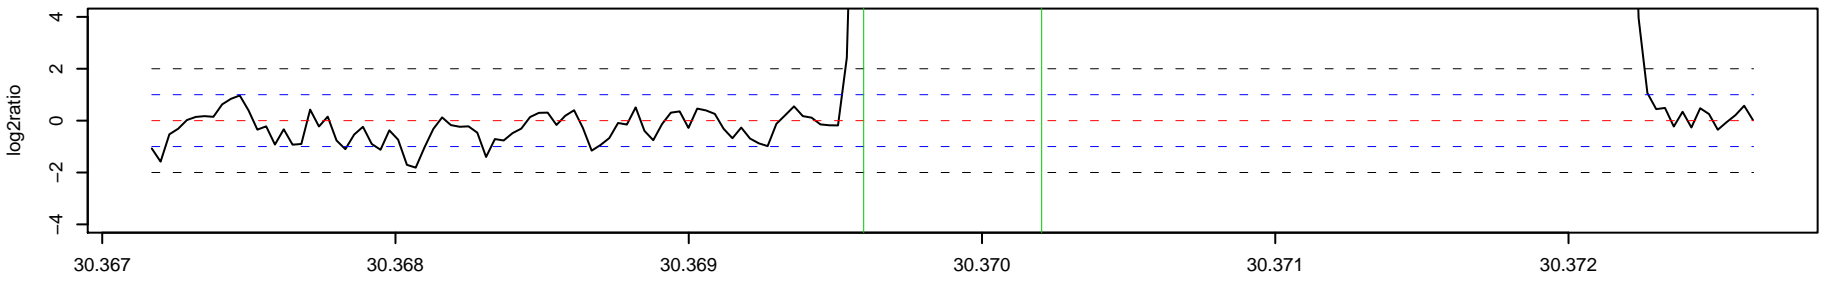

486\_AK1 Chr 12 : 30809402 – 30810048 , 647 bp (aCGH relative log2ratio= 0.62 )

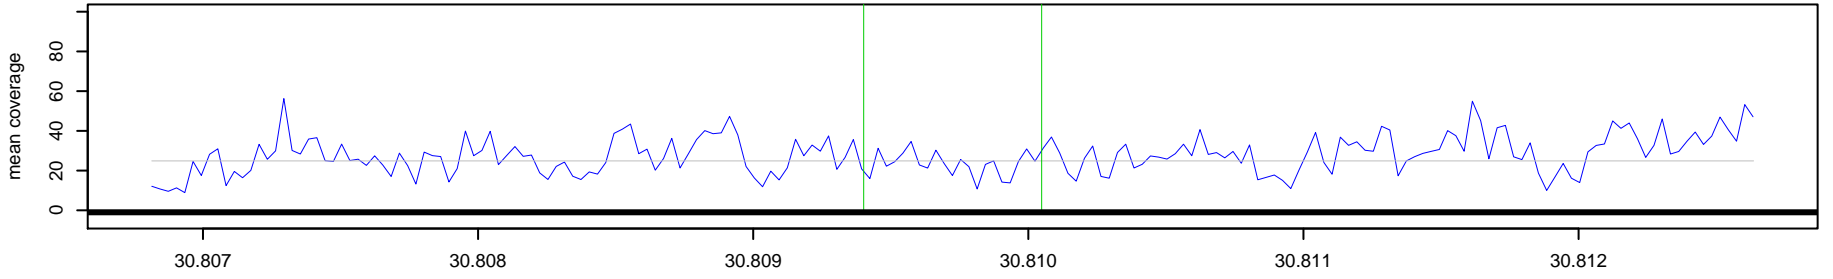

486\_NA10851 Chr 12 : 30809402 – 30810048 , 647 bp (aCGH relative log2ratio= 0.62 )

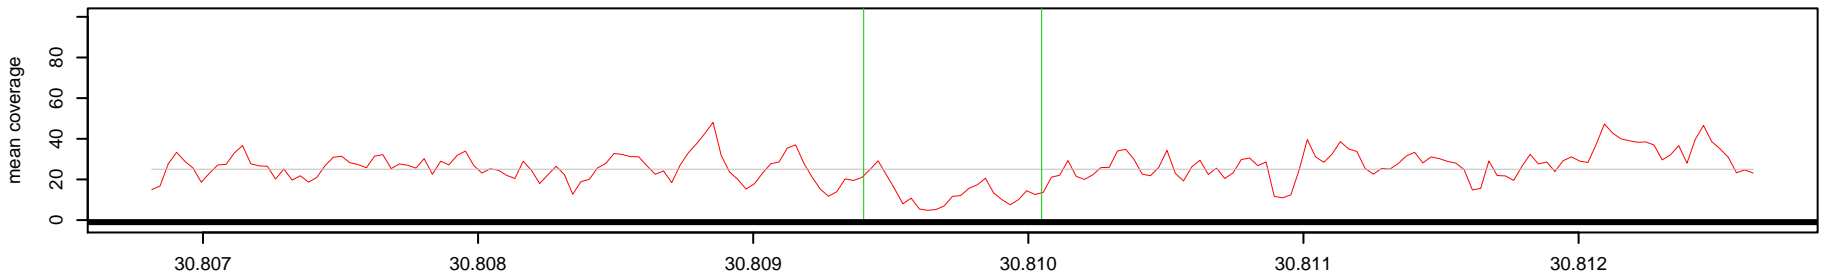

Log2( AK1 read depth / NA10851 read depth)

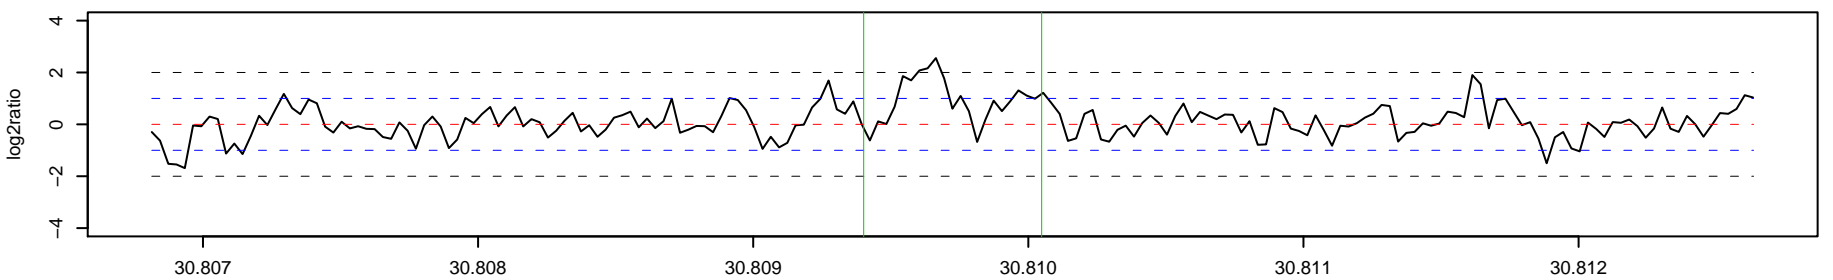

487\_AK1 Chr 12 : 31154193 – 31242521 , 88329 bp (aCGH relative log2ratio= 0.40)

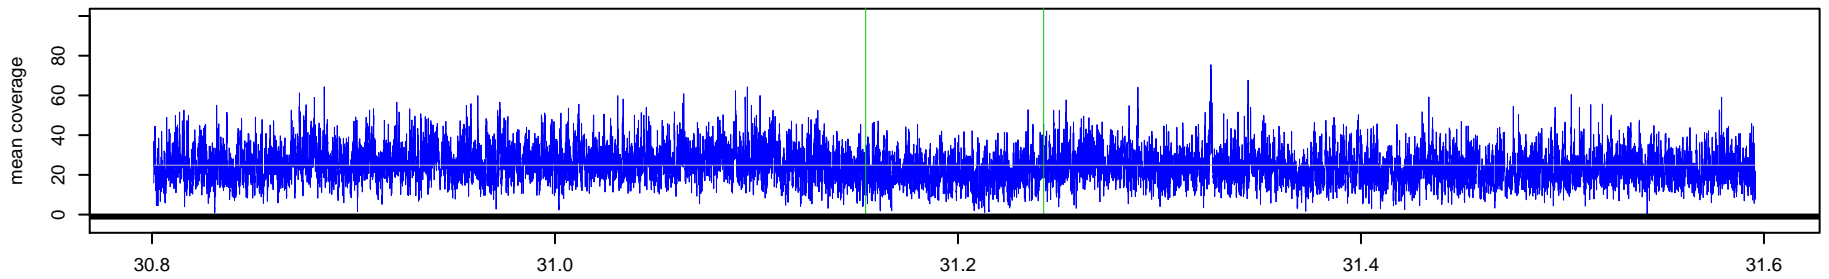

487\_NA10851 Chr 12 : 31154193 – 31242521 , 88329 bp (aCGH relative log2ratio= 0.40)

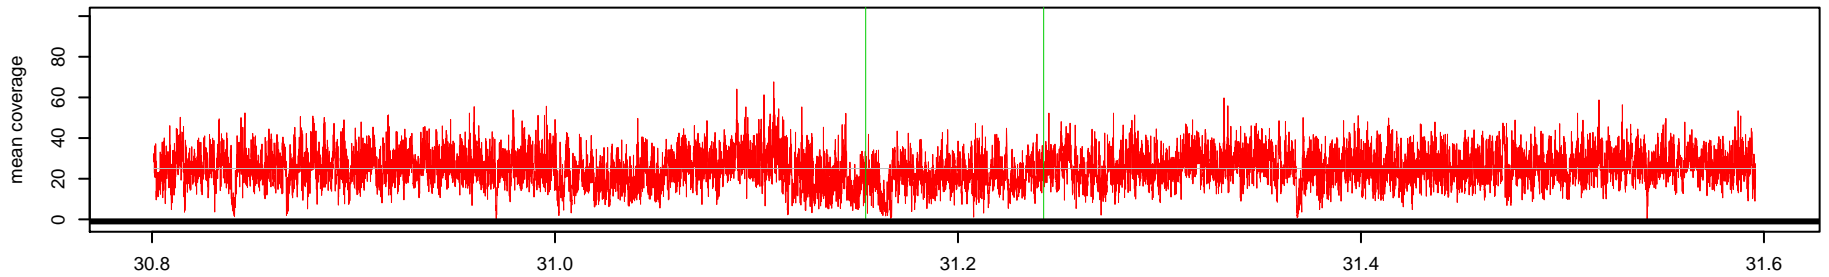

Log2( AK1 read depth / NA10851 read depth)

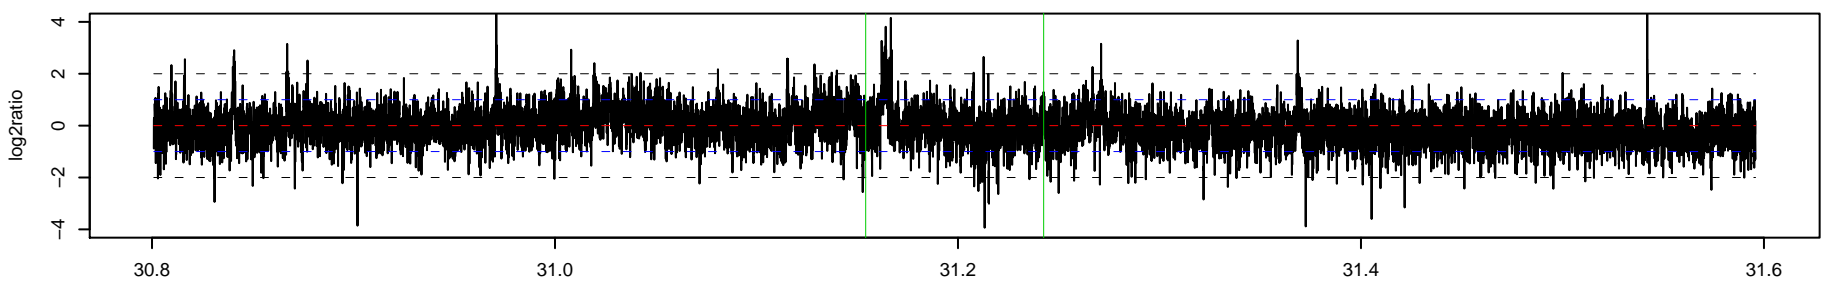

488\_AK1 Chr 12 : 31800014 – 31801189 , 1176 bp (aCGH relative log2ratio= 0.96)

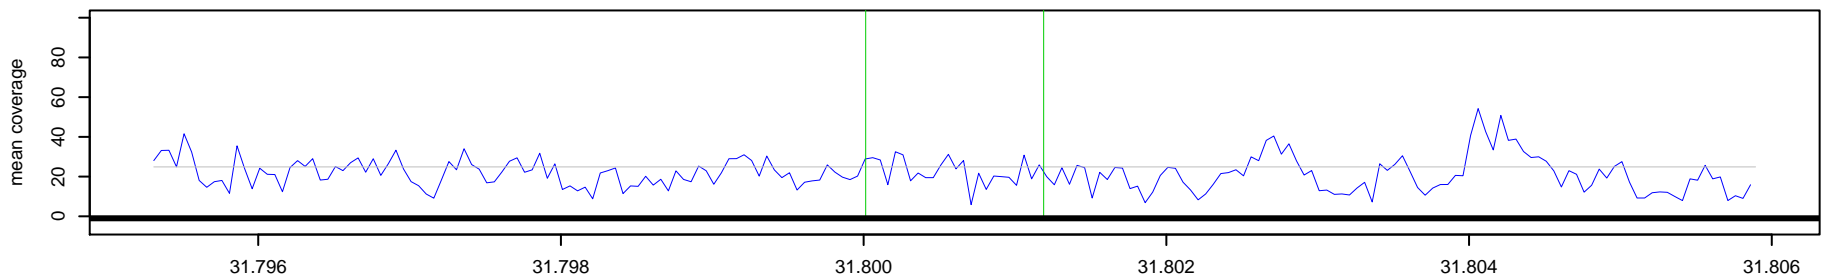

488\_NA10851 Chr 12 : 31800014 – 31801189 , 1176 bp (aCGH relative log2ratio= 0.96)

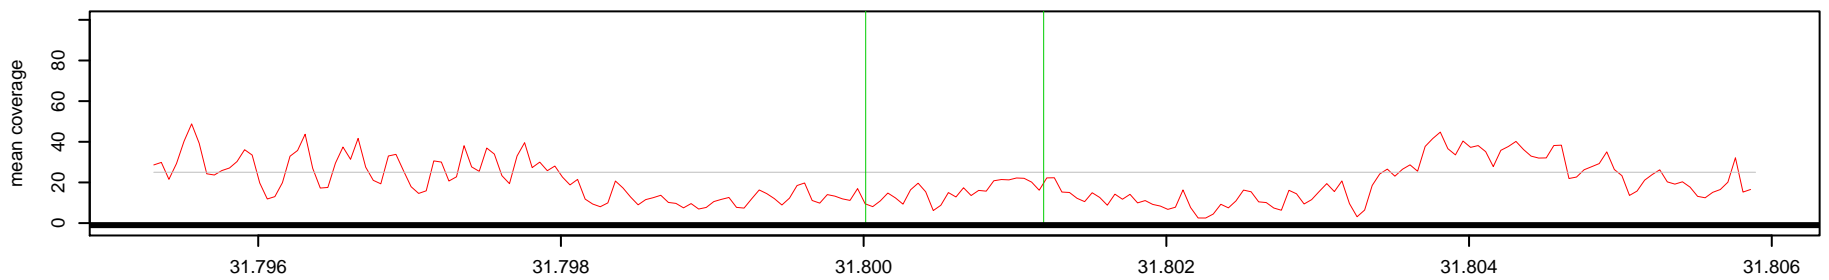

Log2( AK1 read depth / NA10851 read depth)

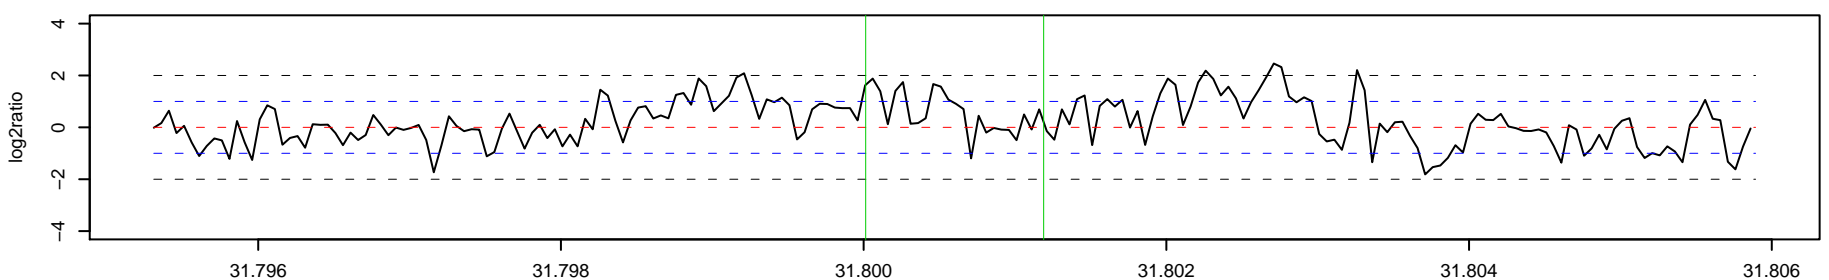



489\_AK1 Chr 12 : 41306400 – 41313702 , 7303 bp (aCGH relative log2ratio= -2.68 )

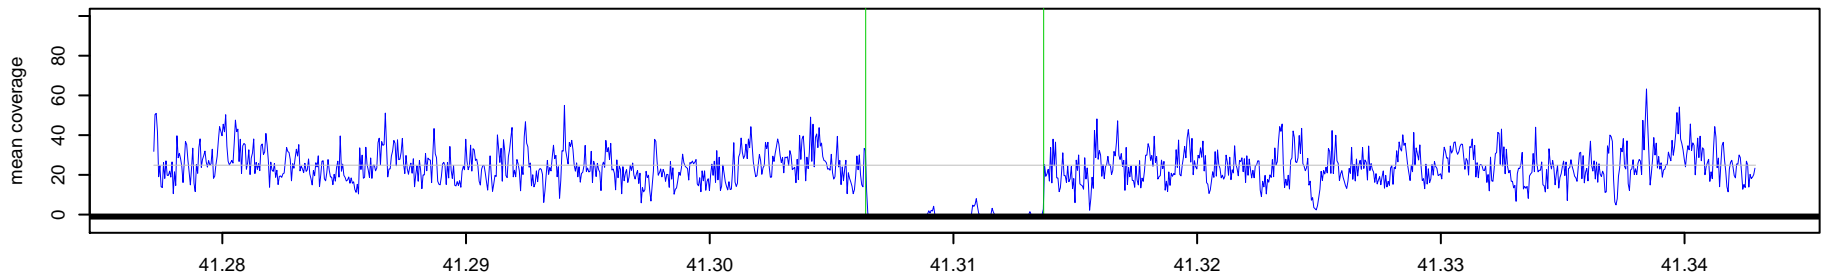

489\_NA10851 Chr 12 : 41306400 – 41313702 , 7303 bp (aCGH relative log2ratio= -2.68 )

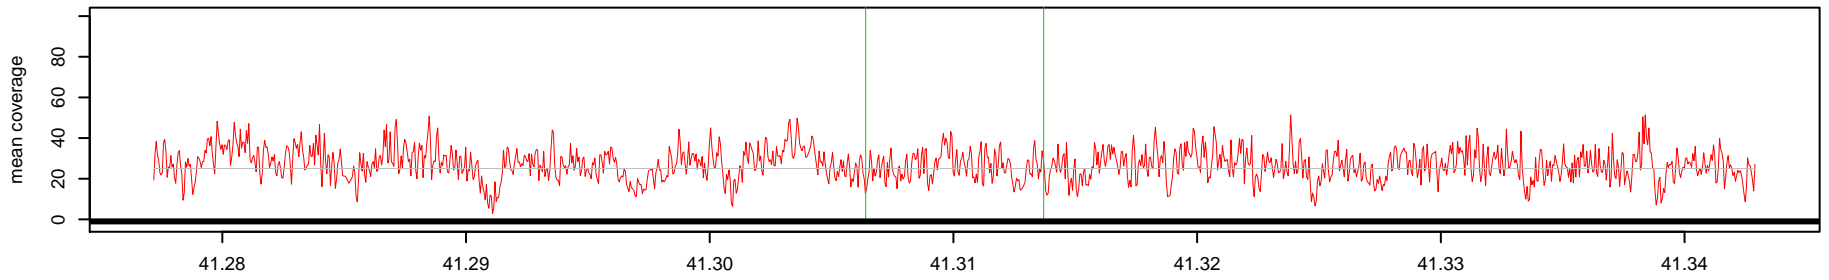

Log2( AK1 read depth / NA10851 read depth)

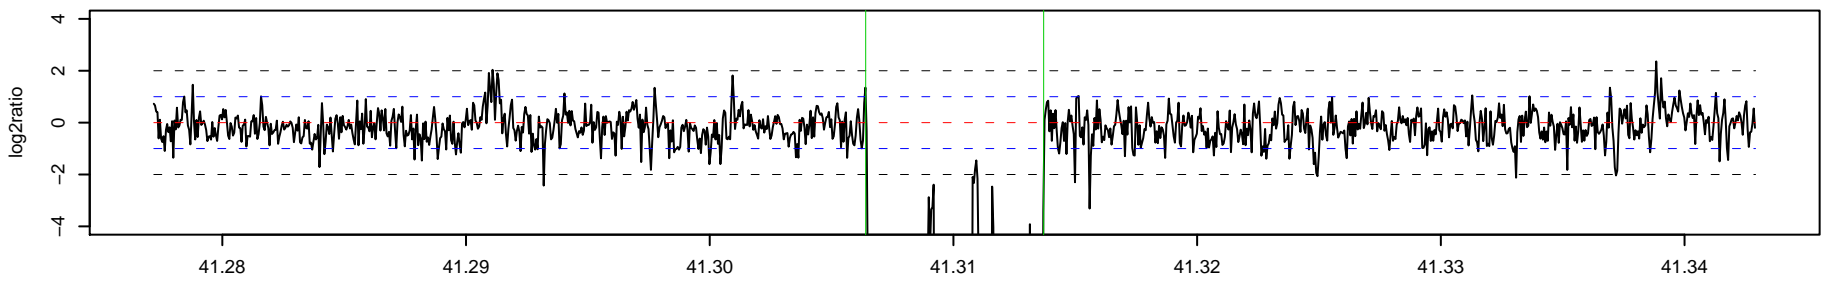

490\_AK1 Chr 12 : 43066768 – 43067606 , 839 bp (aCGH relative log2ratio= 0.53 )

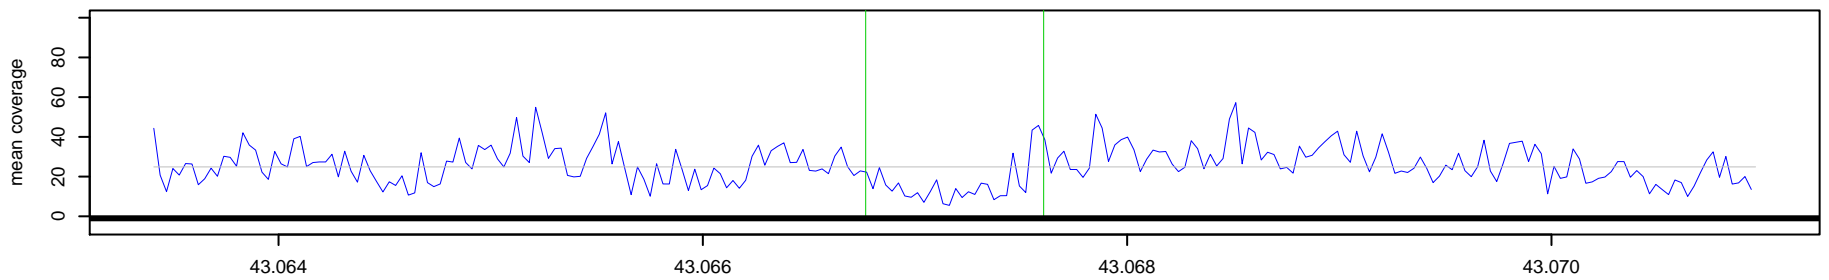

490\_NA10851 Chr 12 : 43066768 – 43067606 , 839 bp (aCGH relative log2ratio= 0.53 )

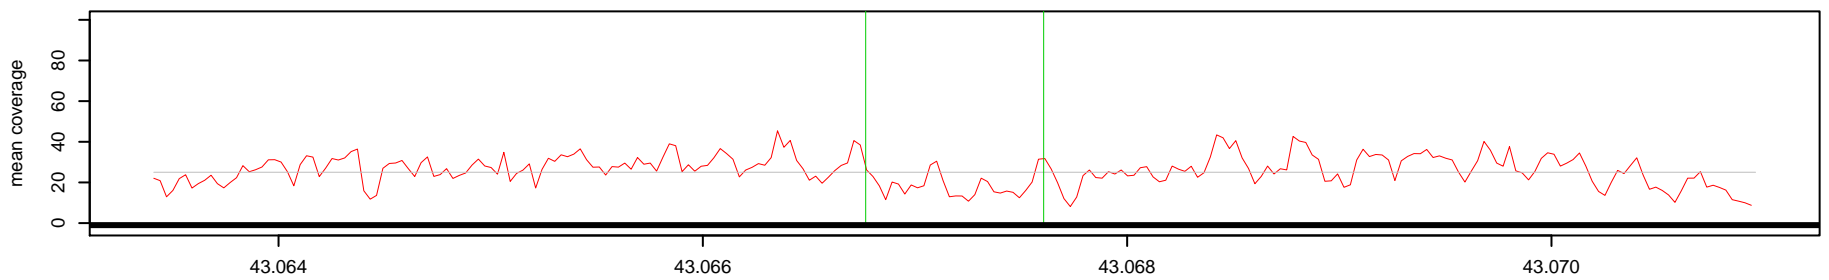

Log2( AK1 read depth / NA10851 read depth)

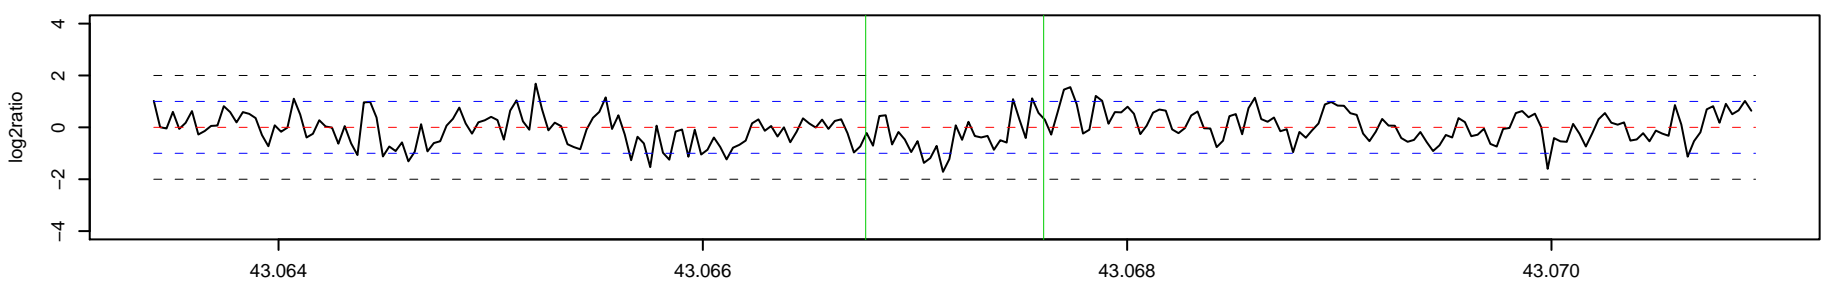

491 \_ AK1 Chr 12 : 44193769 – 44195350 , 1582 bp (aCGH relative log2ratio= 0.75 )

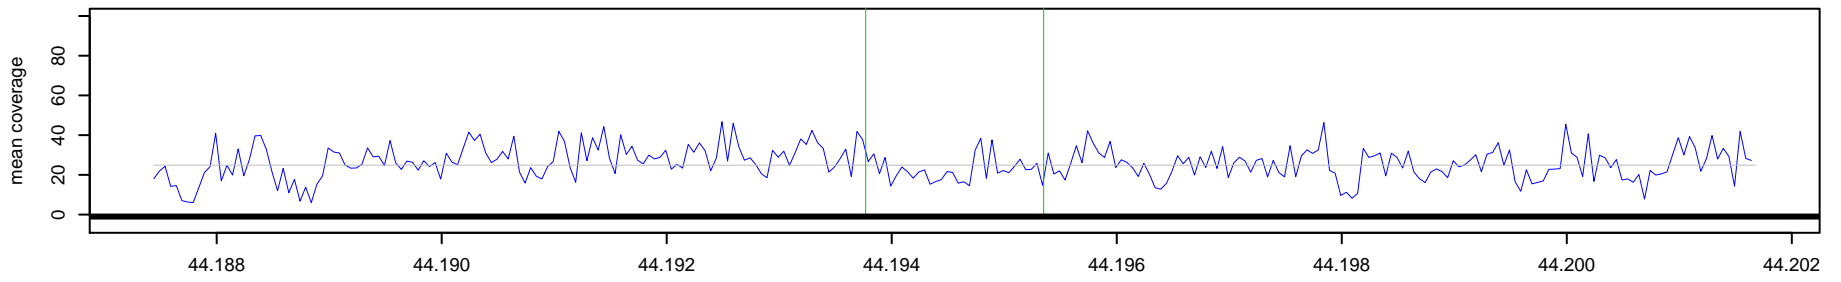

491 \_ NA10851 Chr 12 : 44193769 – 44195350 , 1582 bp (aCGH relative log2ratio= 0.75 )

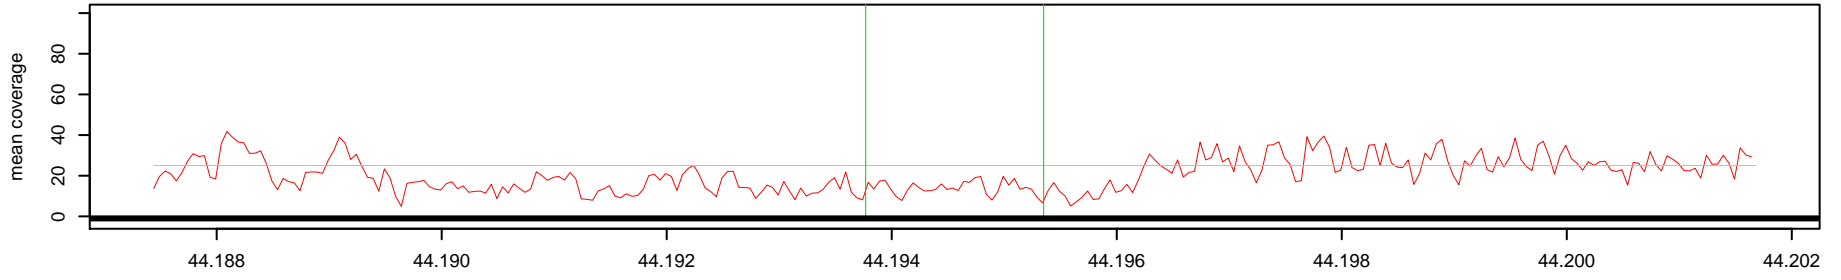

Log2( AK1 read depth / NA10851 read depth)

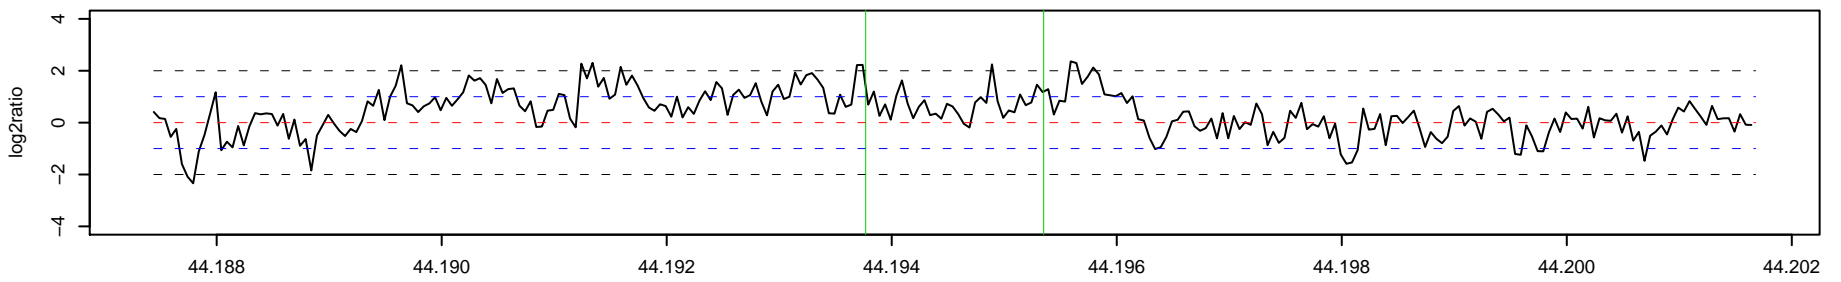

492 \_ AK1 Chr 12 : 57238293 – 57238794 , 502 bp (aCGH relative log2ratio= 0.74 )

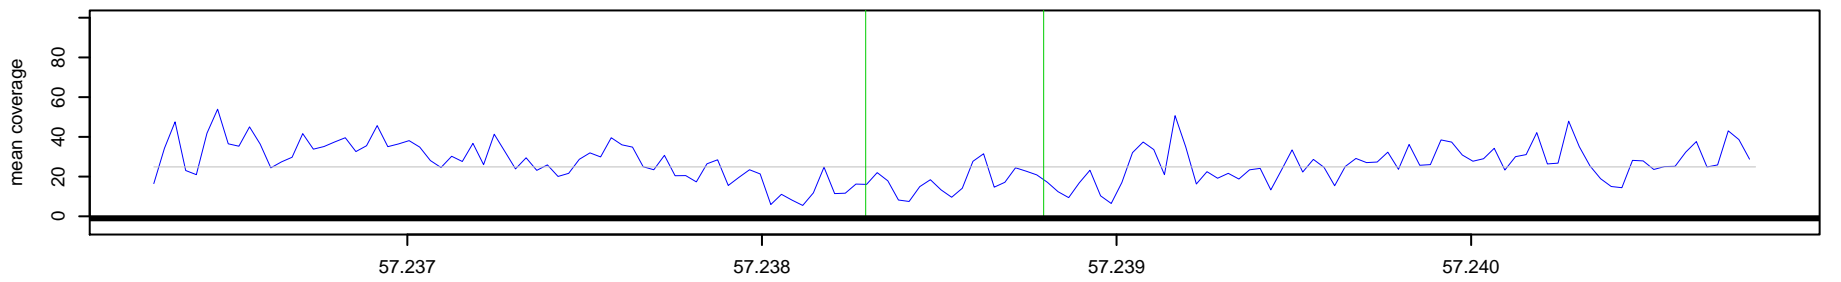

492 \_ NA10851 Chr 12 : 57238293 – 57238794 , 502 bp (aCGH relative log2ratio= 0.74 )

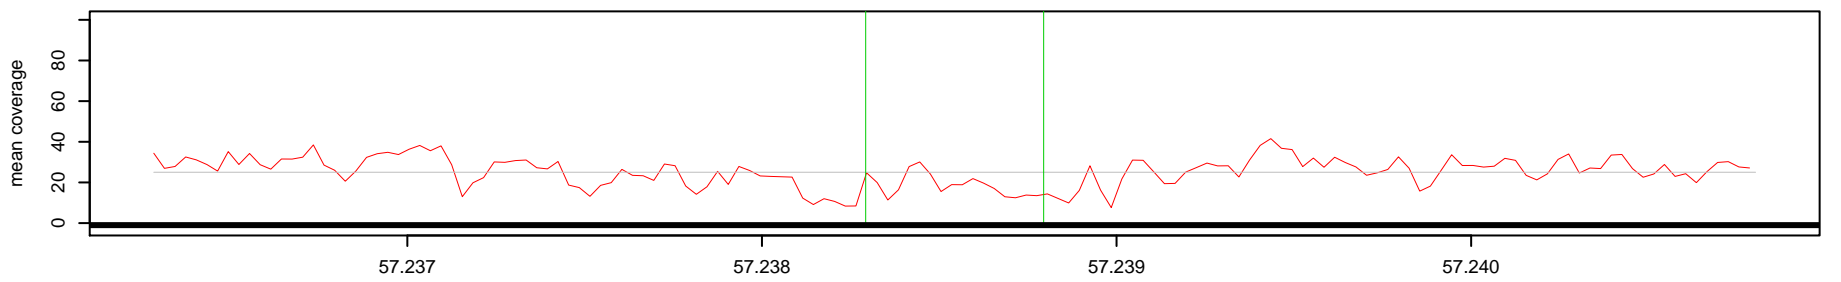

Log2( AK1 read depth / NA10851 read depth)

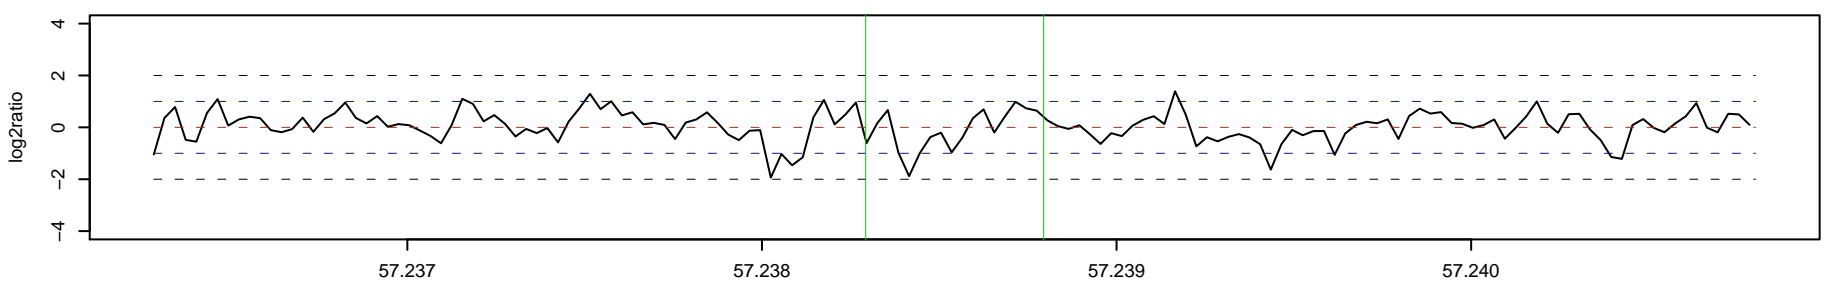

493\_AK1 Chr 12 : 57660064 – 57660567 , 504 bp (aCGH relative log2ratio= -0.87 )

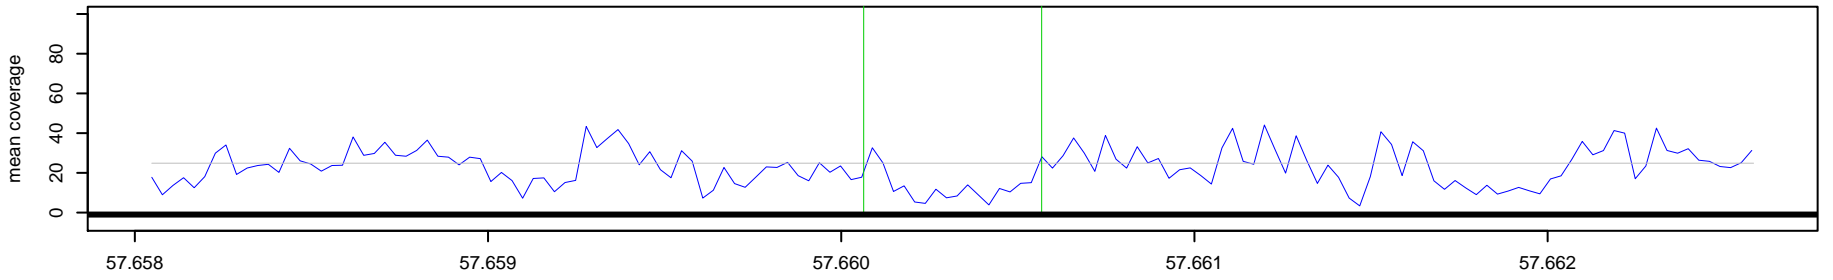

493\_NA10851 Chr 12 : 57660064 – 57660567 , 504 bp (aCGH relative log2ratio= -0.87 )

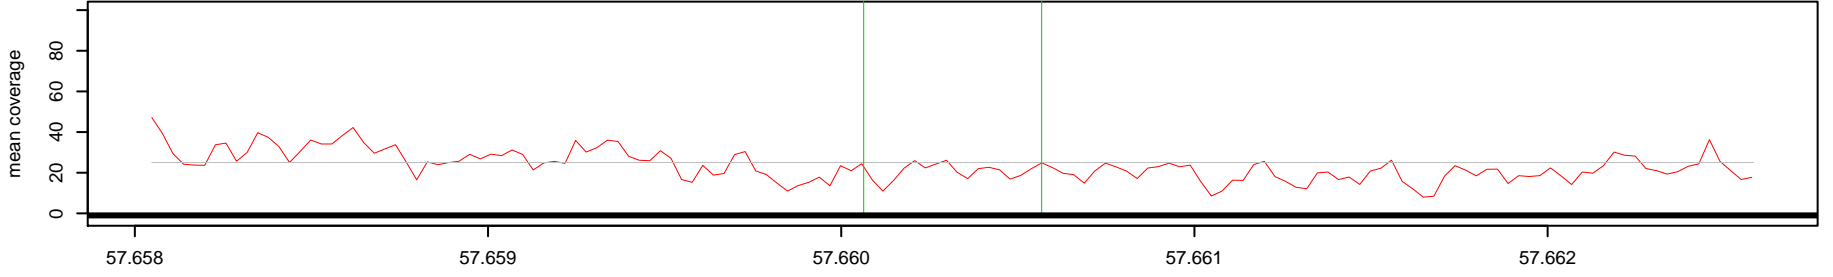

Log2( AK1 read depth / NA10851 read depth)

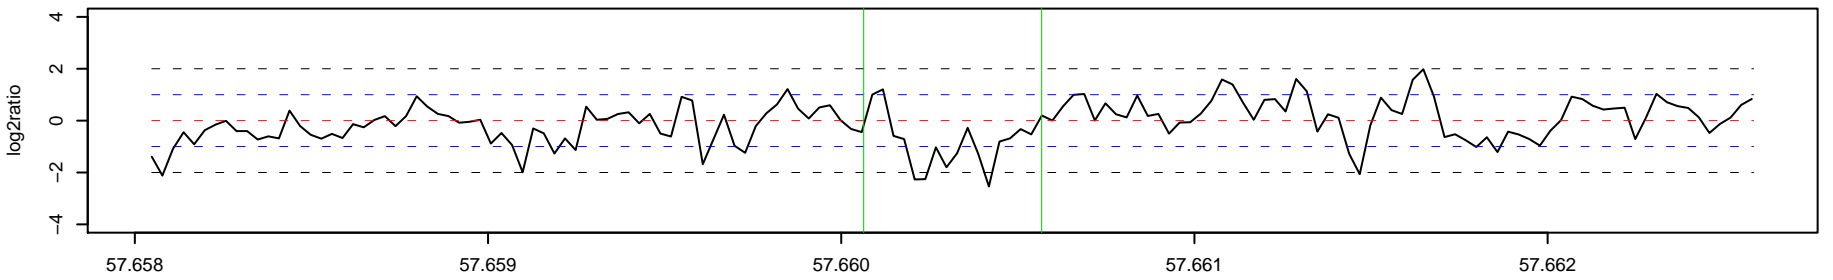

494\_AK1 Chr 12 : 58808091 – 58811294 , 3204 bp (aCGH relative log2ratio= 2.21 )

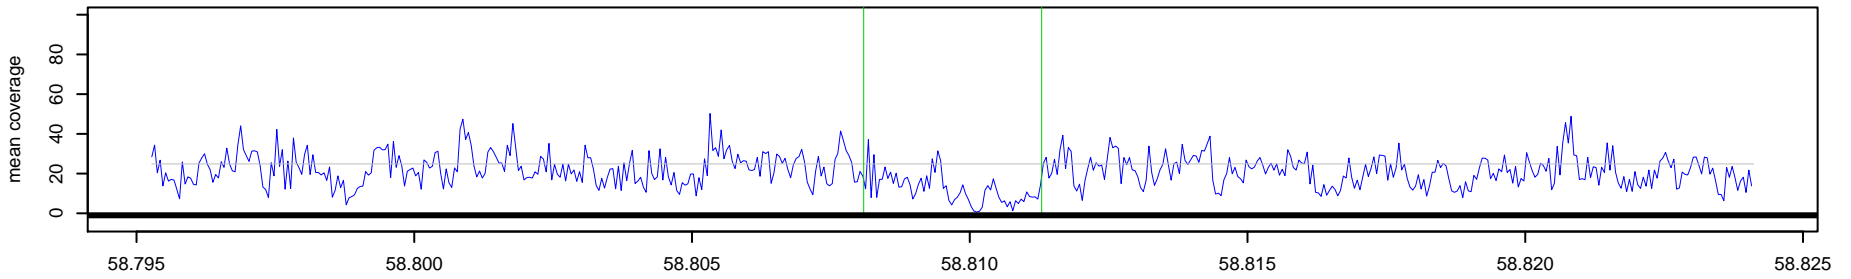

494\_NA10851 Chr 12 : 58808091 – 58811294 , 3204 bp (aCGH relative log2ratio= 2.21 )

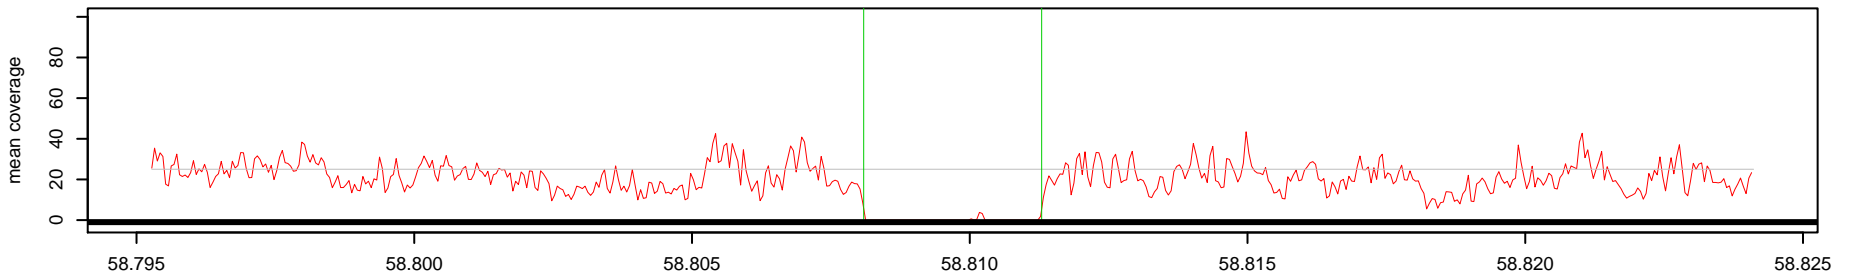

Log2( AK1 read depth / NA10851 read depth)

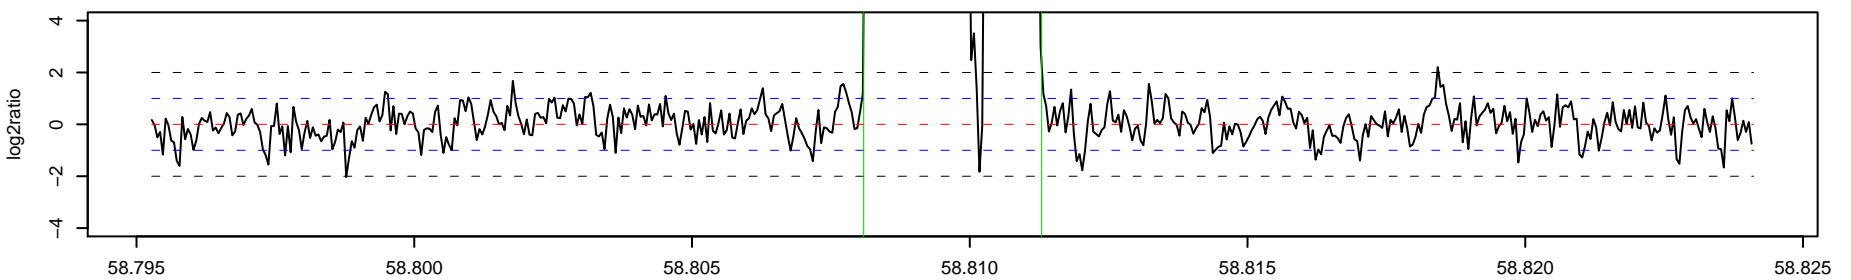

495\_AK1 Chr 12 : 67541823 – 67542775 , 953 bp (aCGH relative log2ratio= 0.71 )

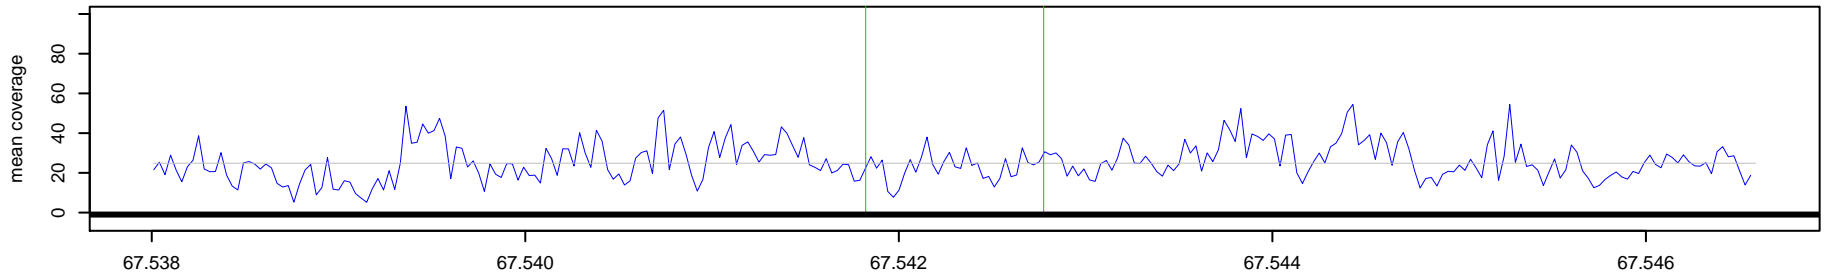

495\_NA10851 Chr 12 : 67541823 – 67542775 , 953 bp (aCGH relative log2ratio= 0.71 )

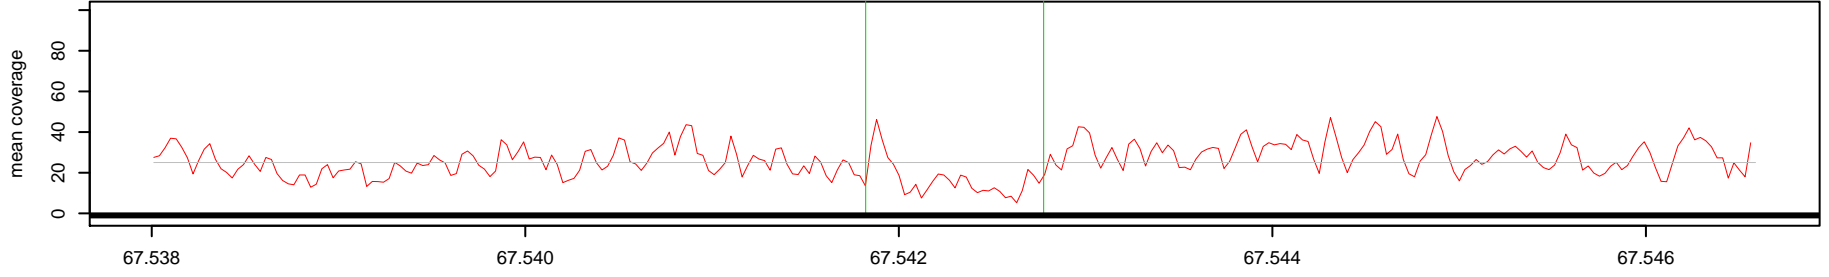

Log2( AK1 read depth / NA10851 read depth)

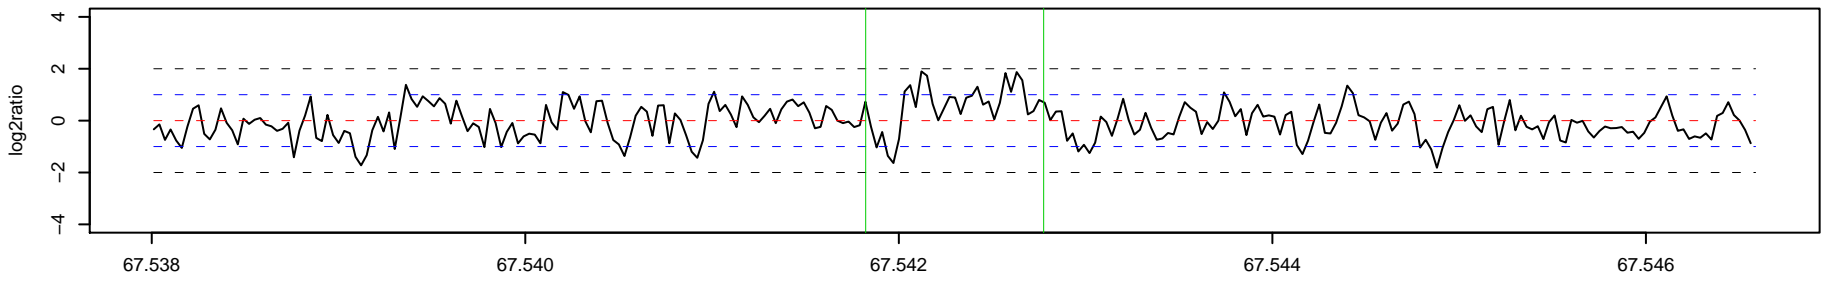

496\_AK1 Chr 12 : 69160184 – 69164568 , 4385 bp (aCGH relative log2ratio= 0.66 )

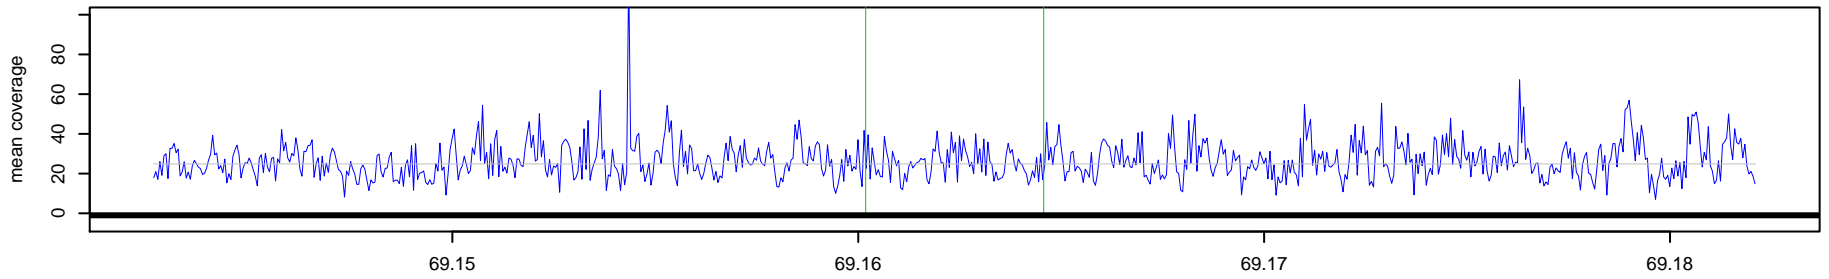

496\_NA10851 Chr 12 : 69160184 – 69164568 , 4385 bp (aCGH relative log2ratio= 0.66 )

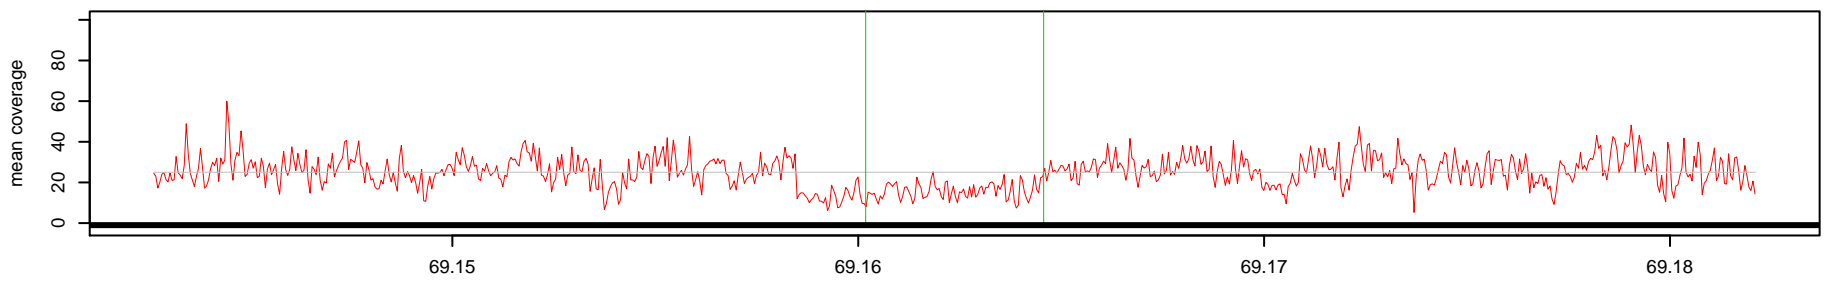

Log2( AK1 read depth / NA10851 read depth)

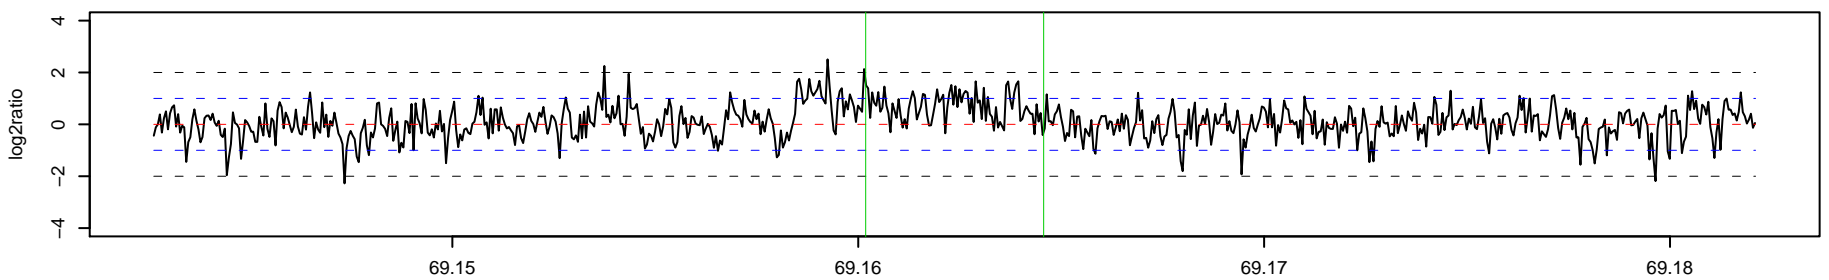

497 \_ AK1 Chr 12 : 70475380 – 70476853 , 1474 bp (aCGH relative log2ratio= -3.47 )

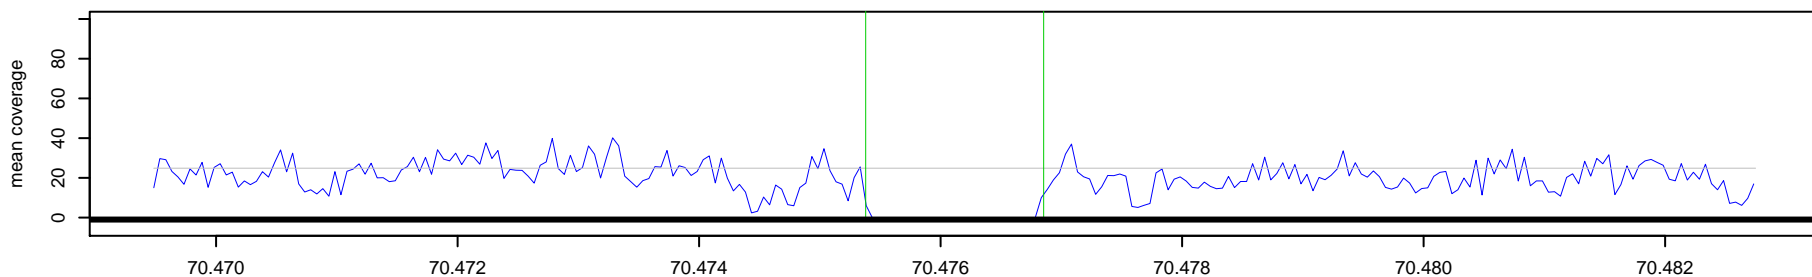

497 \_ NA10851 Chr 12 : 70475380 – 70476853 , 1474 bp (aCGH relative log2ratio= -3.47 )

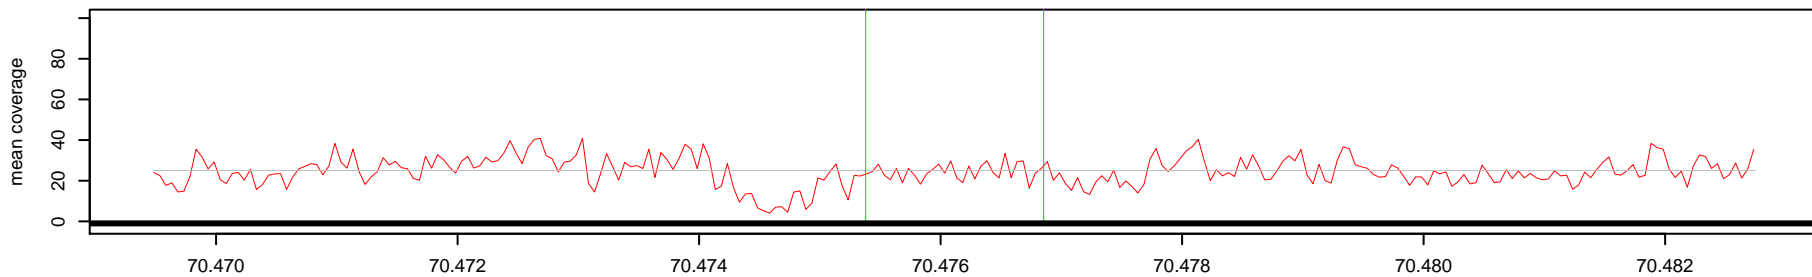

Log2( AK1 read depth / NA10851 read depth)

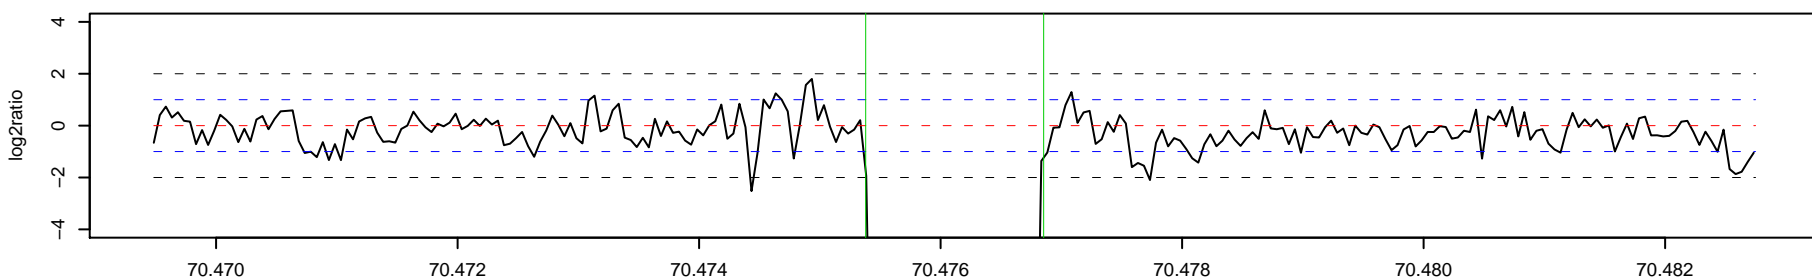

o

o

498 \_ AK1 Chr 12 : 70642975 – 70643965 , 991 bp (aCGH relative log2ratio= -2.67 )

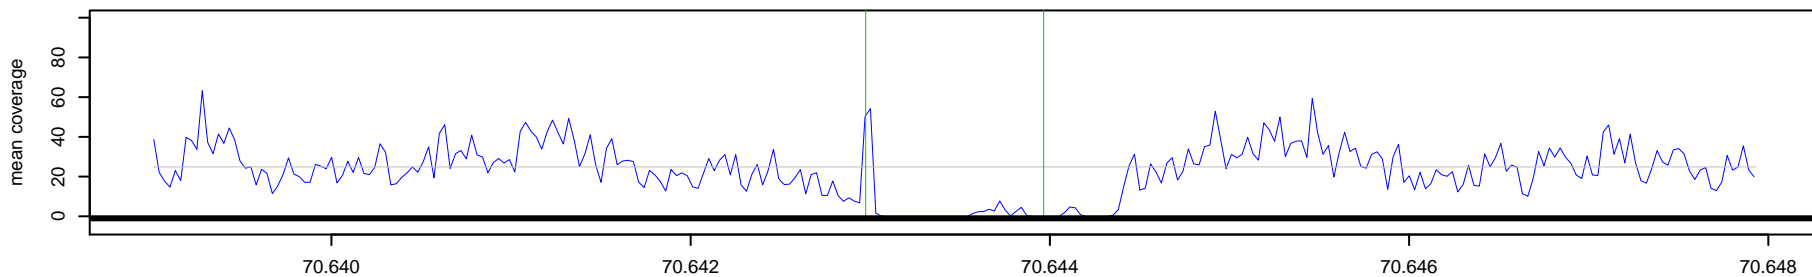

498 \_ NA10851 Chr 12 : 70642975 – 70643965 , 991 bp (aCGH relative log2ratio= -2.67 )

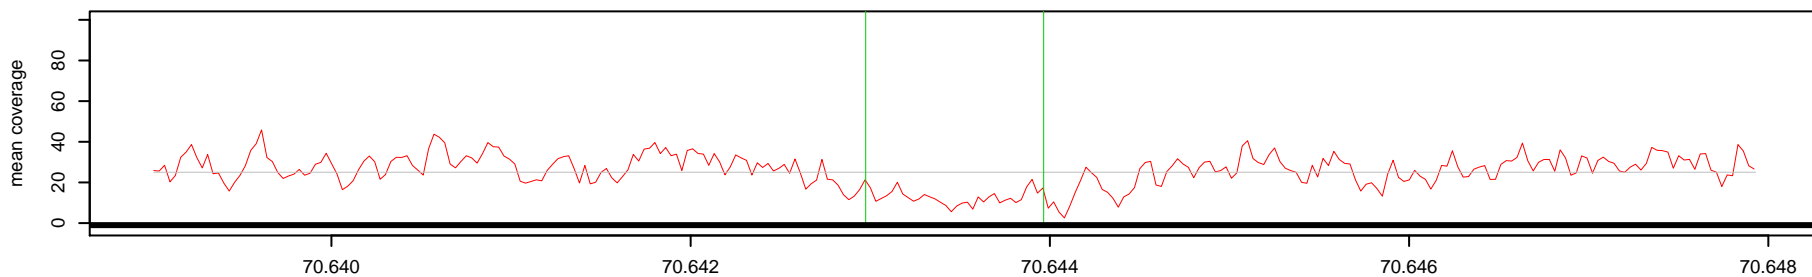

Log2( AK1 read depth / NA10851 read depth)

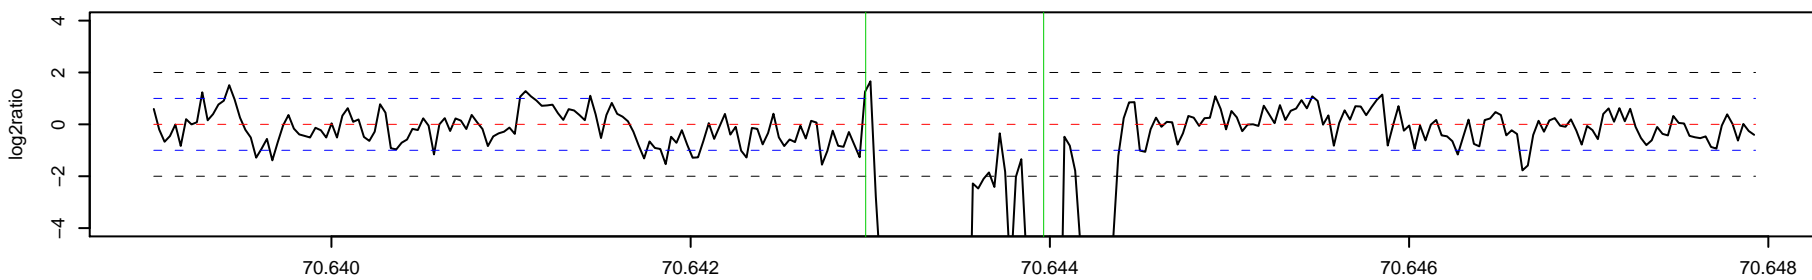

o

499\_AK1 Chr 12 : 78678933 – 78686210 , 7278 bp (aCGH relative log2ratio= -0.47 )

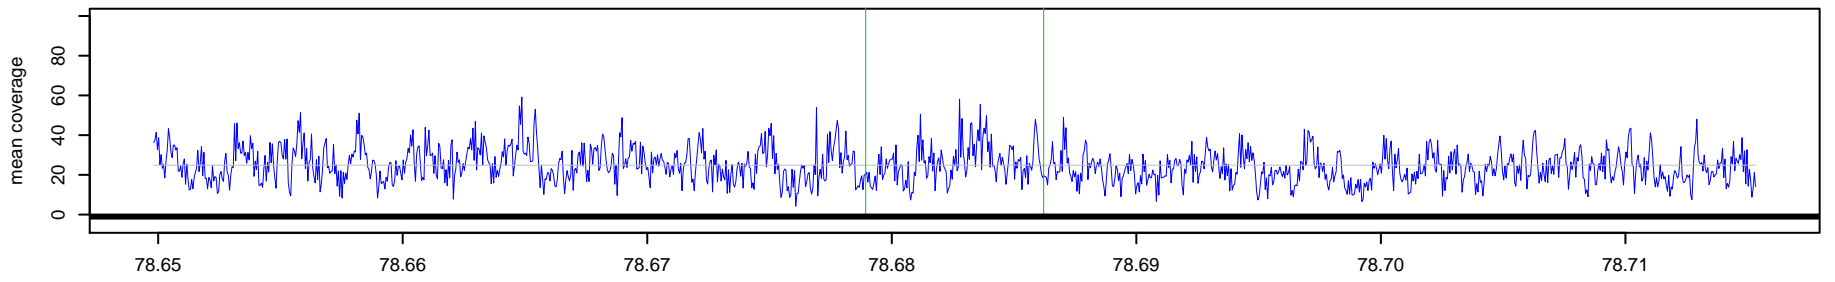

499\_NA10851 Chr 12 : 78678933 – 78686210 , 7278 bp (aCGH relative log2ratio= -0.47 )

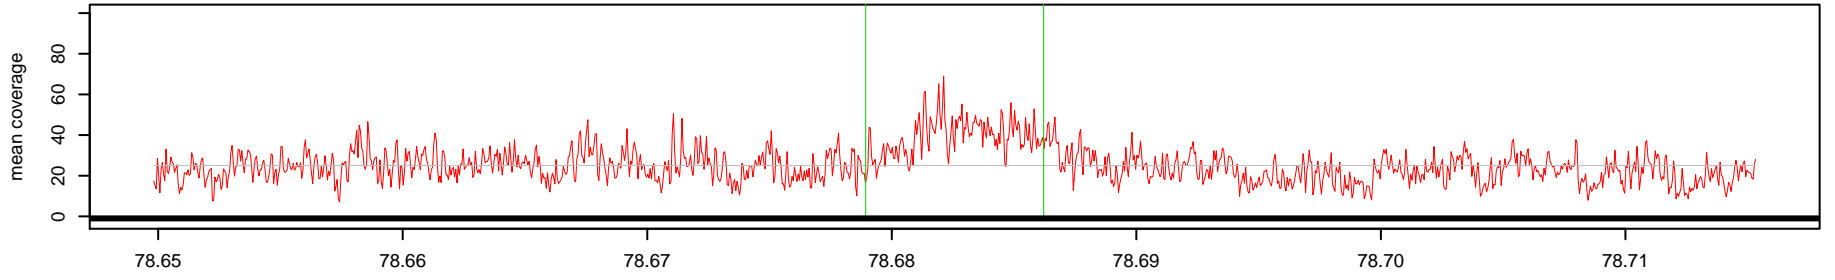

Log2( AK1 read depth / NA10851 read depth)

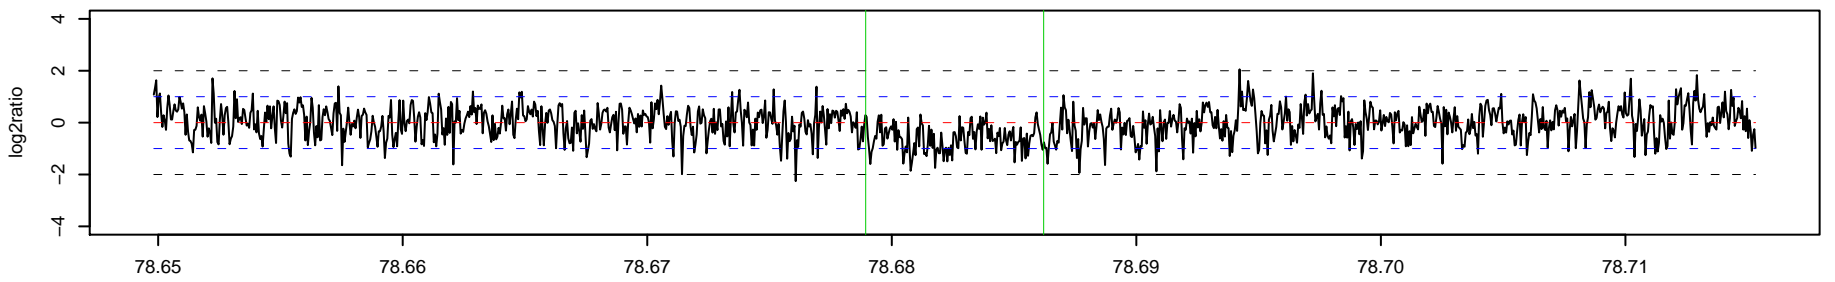

500\_AK1 Chr 12 : 85219790 – 85227302 , 7513 bp (aCGH relative log2ratio= -0.87 )

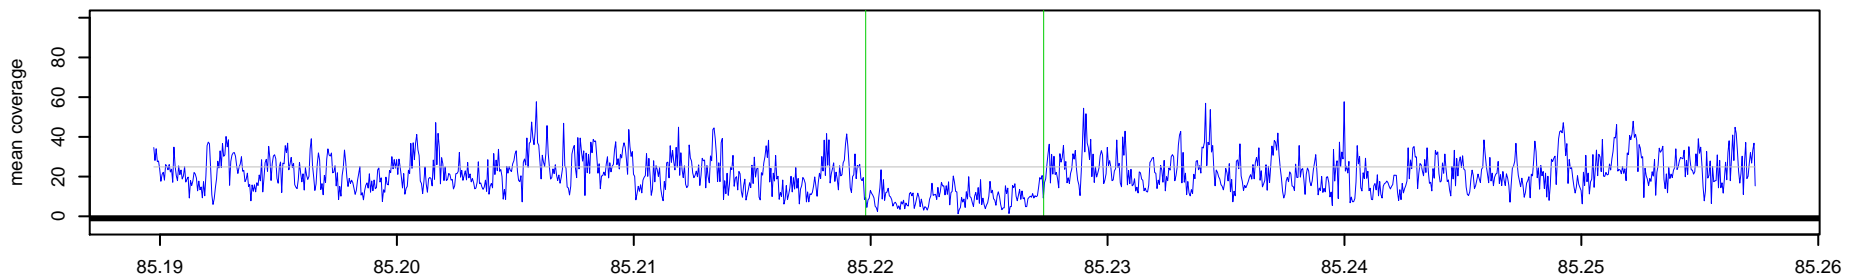

500\_NA10851 Chr 12 : 85219790 – 85227302 , 7513 bp (aCGH relative log2ratio= -0.87 )

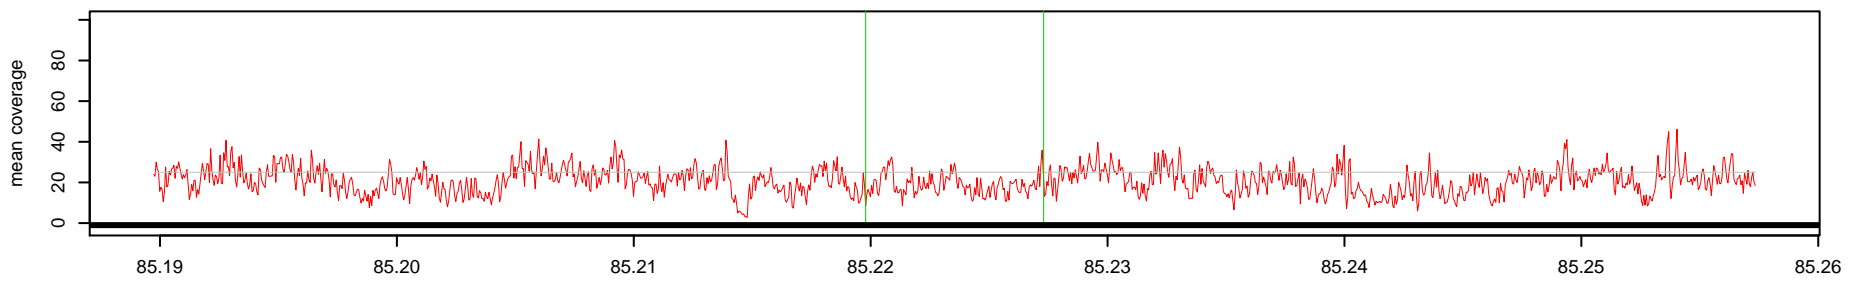

Log2( AK1 read depth / NA10851 read depth)

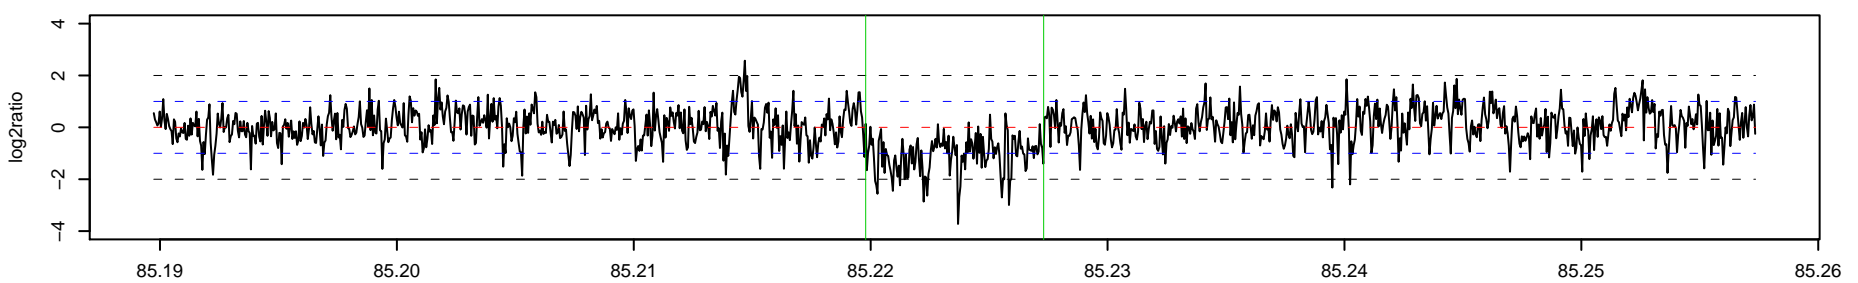

501 \_ AK1 Chr 12 : 89011981 – 89015811 , 3831 bp (aCGH relative log2ratio= -1.11 )

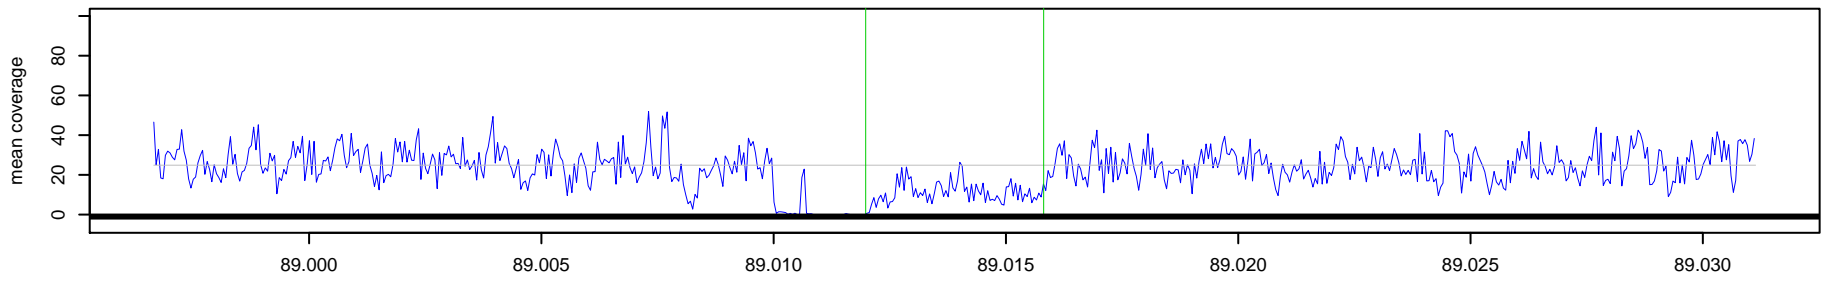

501 \_ NA10851 Chr 12 : 89011981 – 89015811 , 3831 bp (aCGH relative log2ratio= -1.11 )

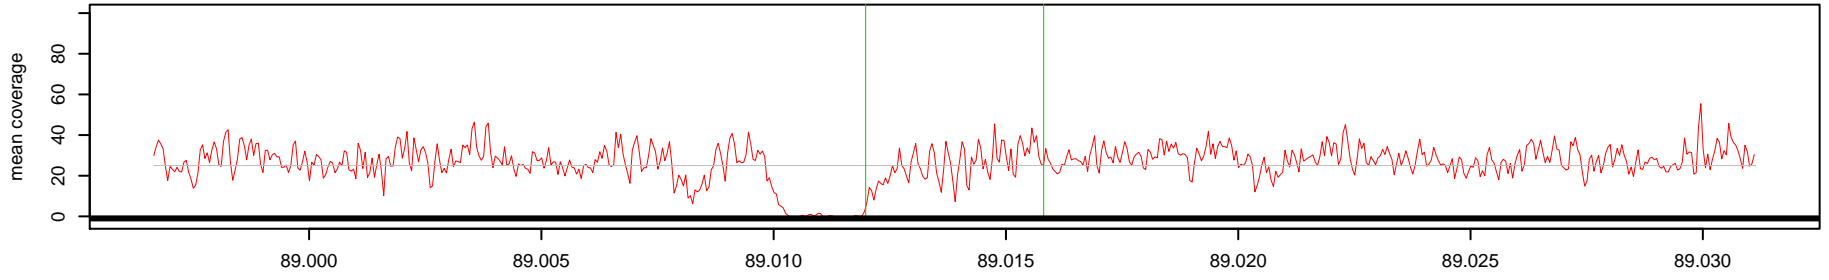

Log2( AK1 read depth / NA10851 read depth)

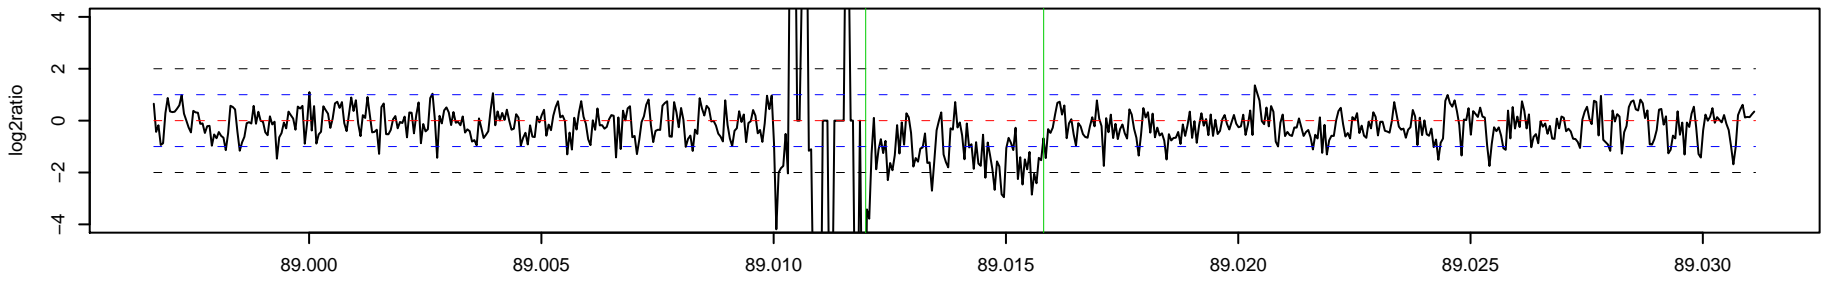

502 \_ AK1 Chr 12 : 94534595 – 94536429 , 1835 bp (aCGH relative log2ratio= 0.79 )

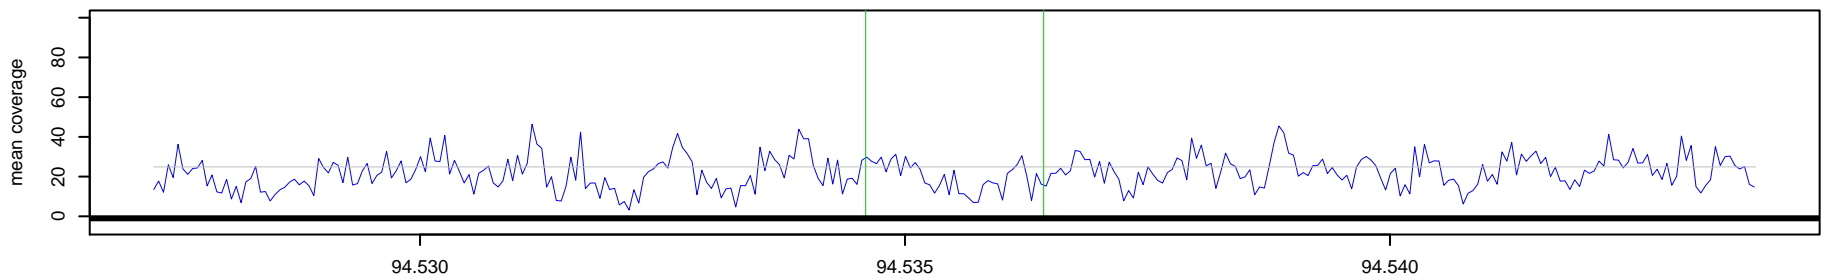

502 \_ NA10851 Chr 12 : 94534595 – 94536429 , 1835 bp (aCGH relative log2ratio= 0.79 )

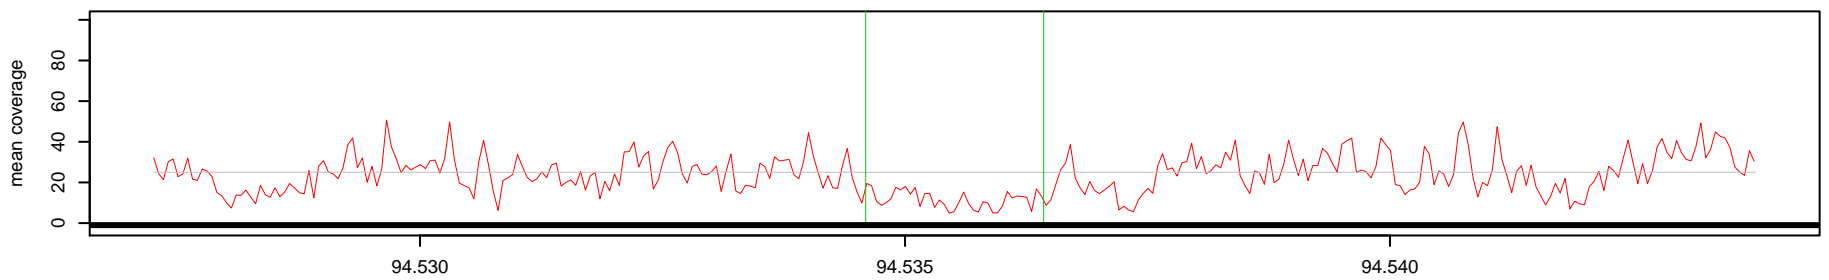

Log2( AK1 read depth / NA10851 read depth)

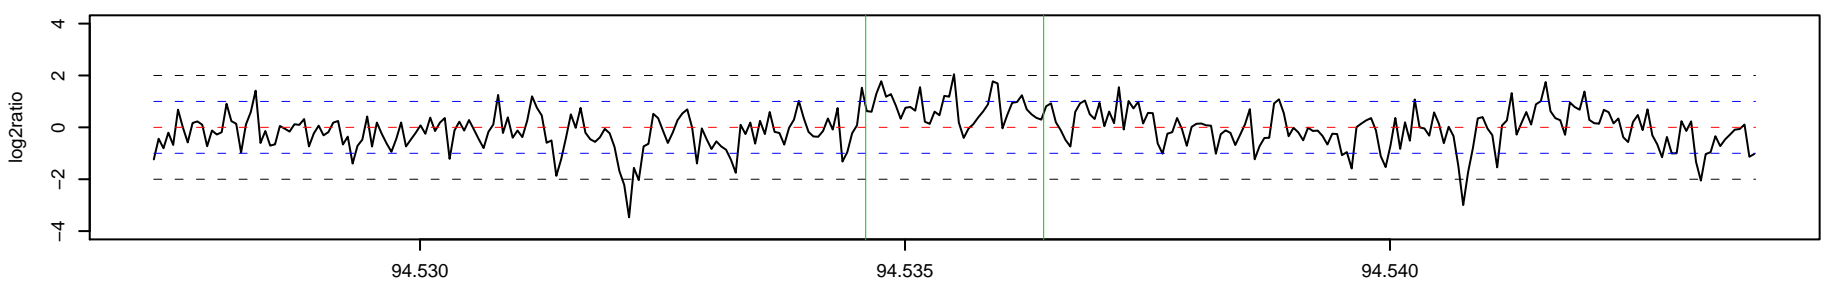

503\_AK1 Chr 12 : 116064243 – 116064688 , 446 bp (aCGH relative log2ratio= 0.55 )

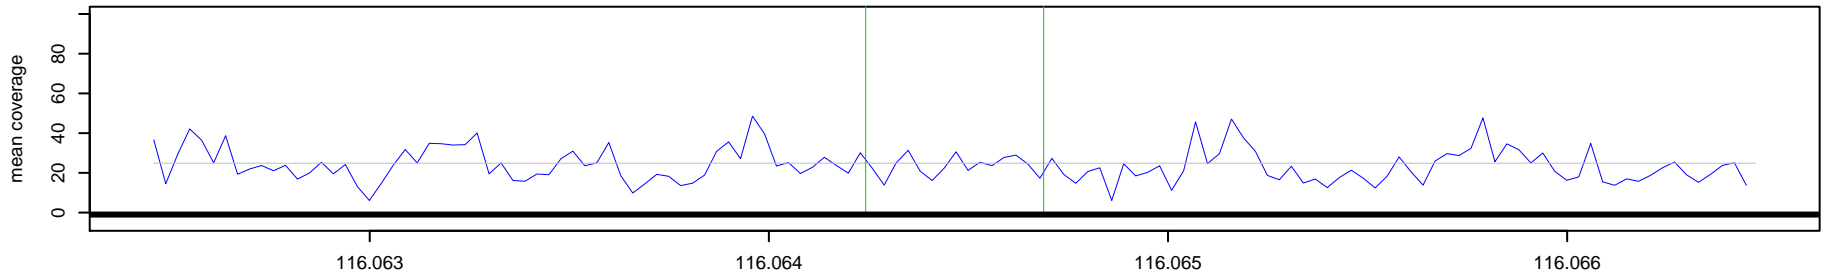

503\_NA10851 Chr 12 : 116064243 – 116064688 , 446 bp (aCGH relative log2ratio= 0.55 )

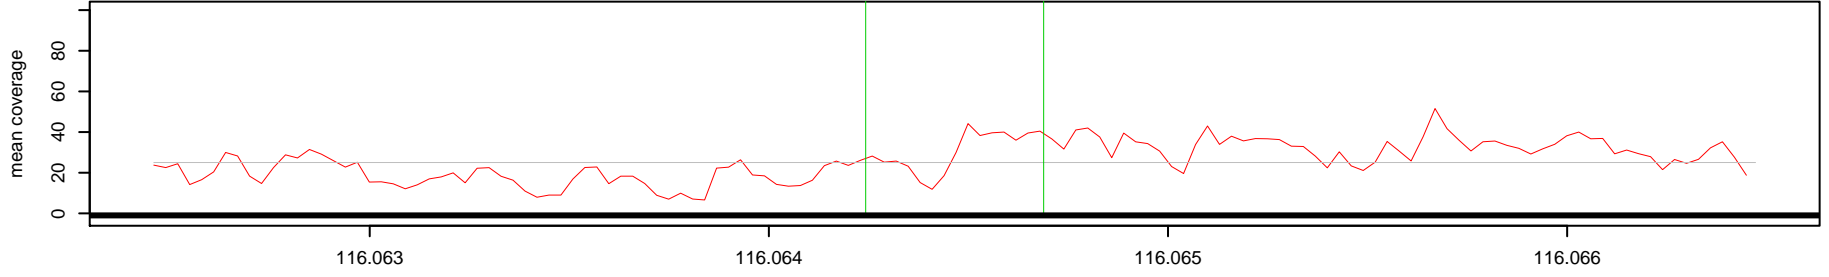

Log2( AK1 read depth / NA10851 read depth)

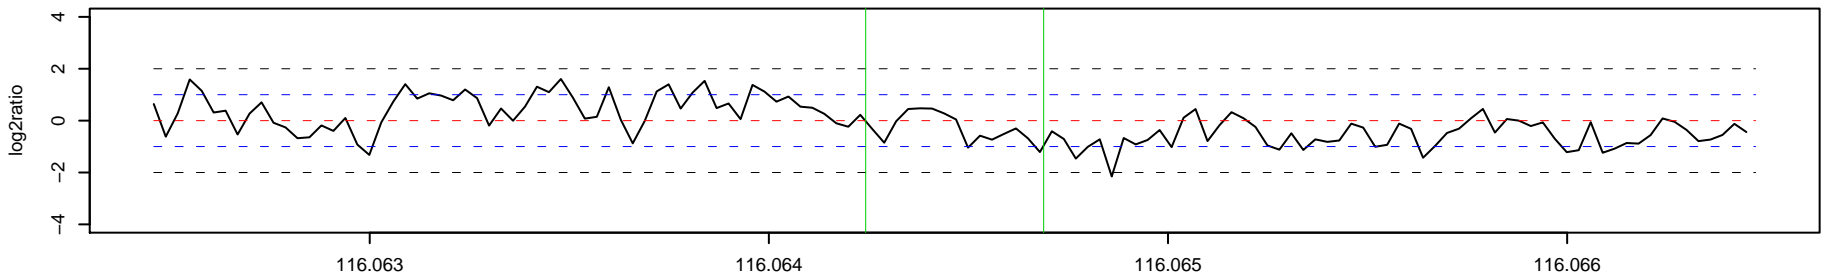

504\_AK1 Chr 12 : 121707136 – 121708997 , 1862 bp (aCGH relative log2ratio= -0.72 )

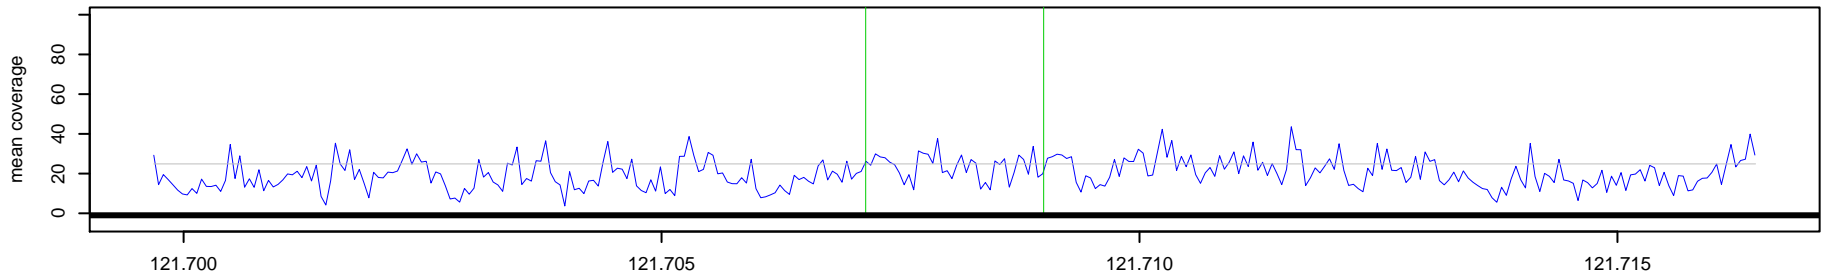

504\_NA10851 Chr 12 : 121707136 – 121708997 , 1862 bp (aCGH relative log2ratio= -0.72 )

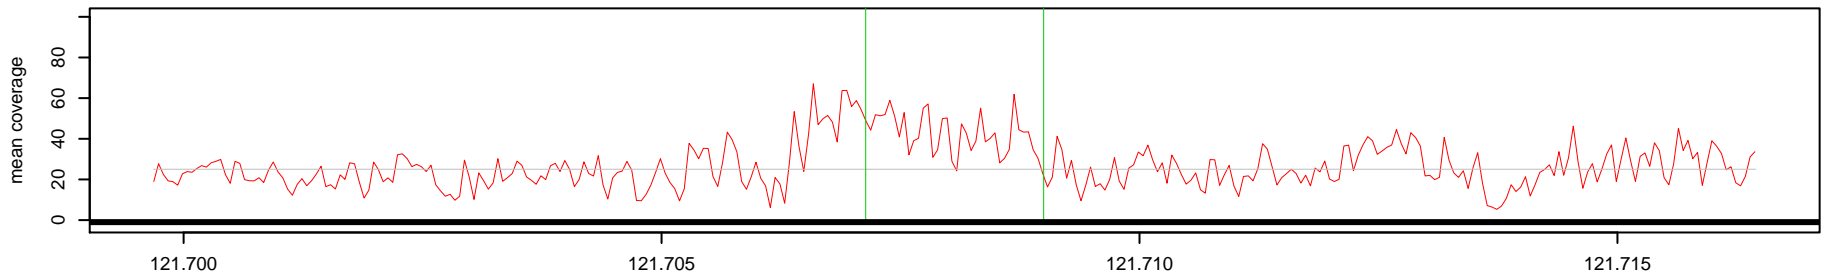

Log2( AK1 read depth / NA10851 read depth)

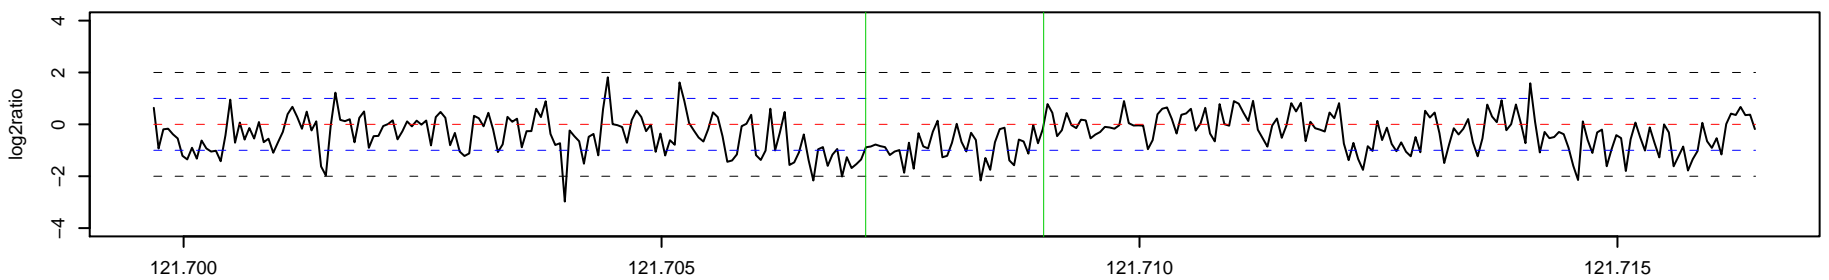



505 \_ AK1 Chr 12 : 123062030 – 123065886 , 3857 bp (aCGH relative log2ratio= -0.51 )

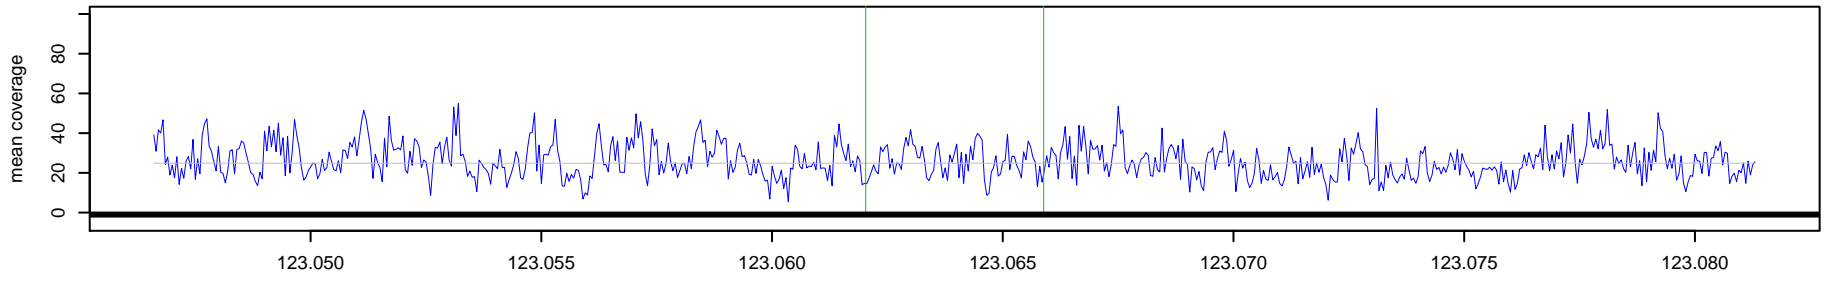

505 \_ NA10851 Chr 12 : 123062030 – 123065886 , 3857 bp (aCGH relative log2ratio= -0.51 )

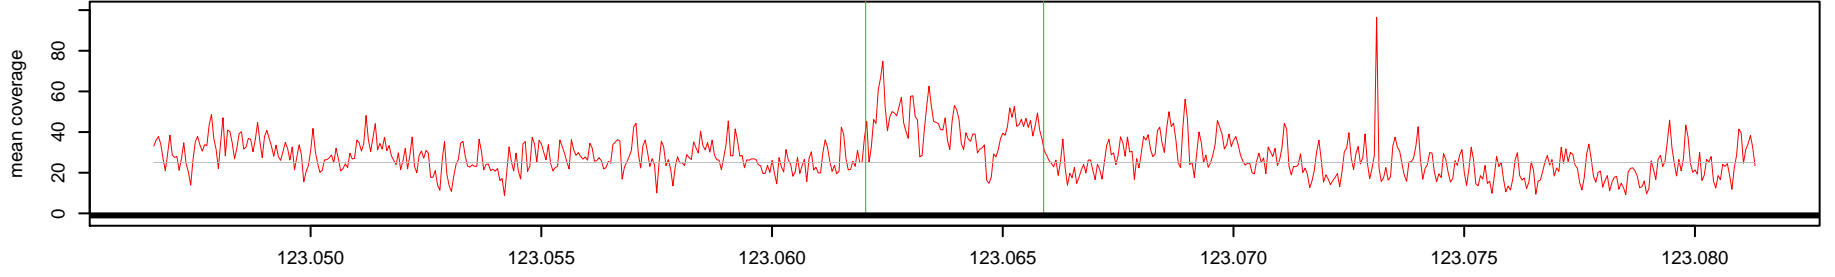

Log2( AK1 read depth / NA10851 read depth)

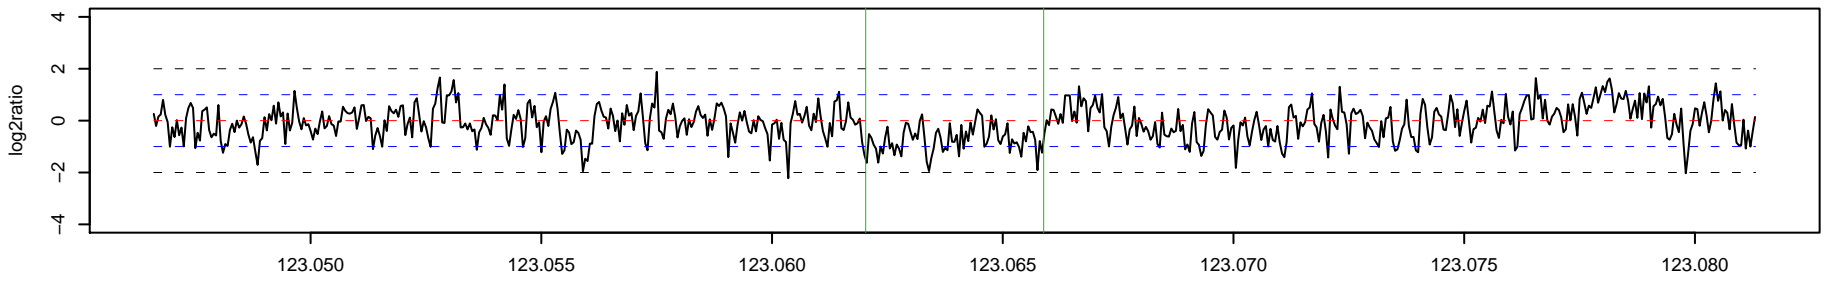

506 \_ AK1 Chr 12 : 126150931 – 126151517 , 587 bp (aCGH relative log2ratio= -1.02 )

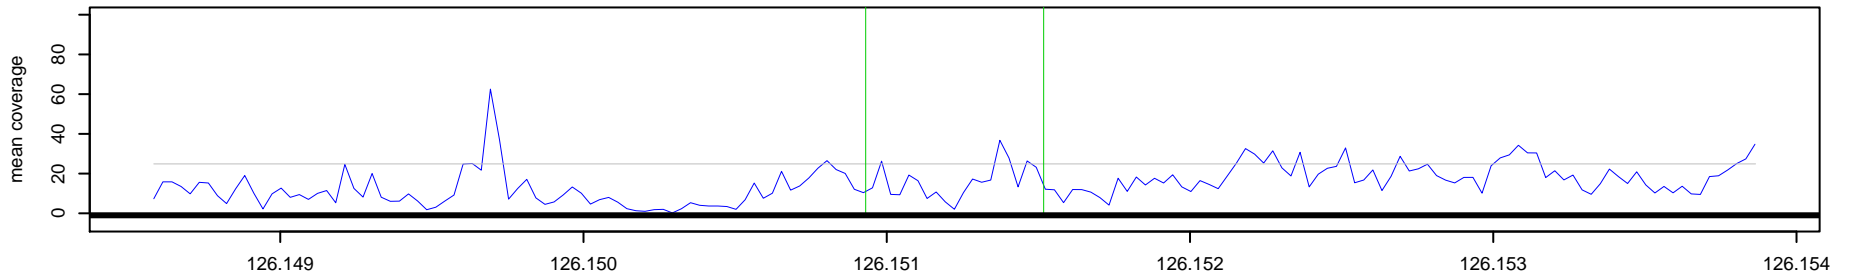

506 \_ NA10851 Chr 12 : 126150931 – 126151517 , 587 bp (aCGH relative log2ratio= -1.02 )

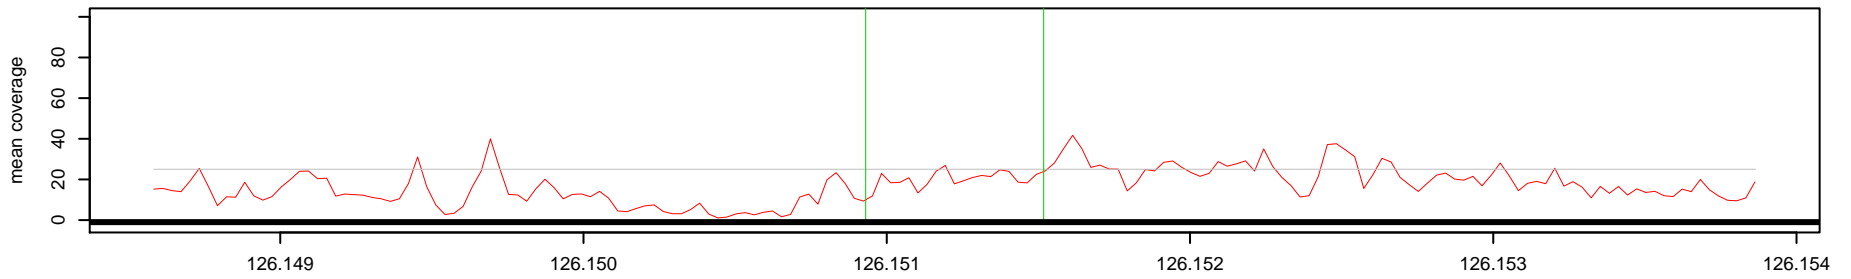

Log2( AK1 read depth / NA10851 read depth)

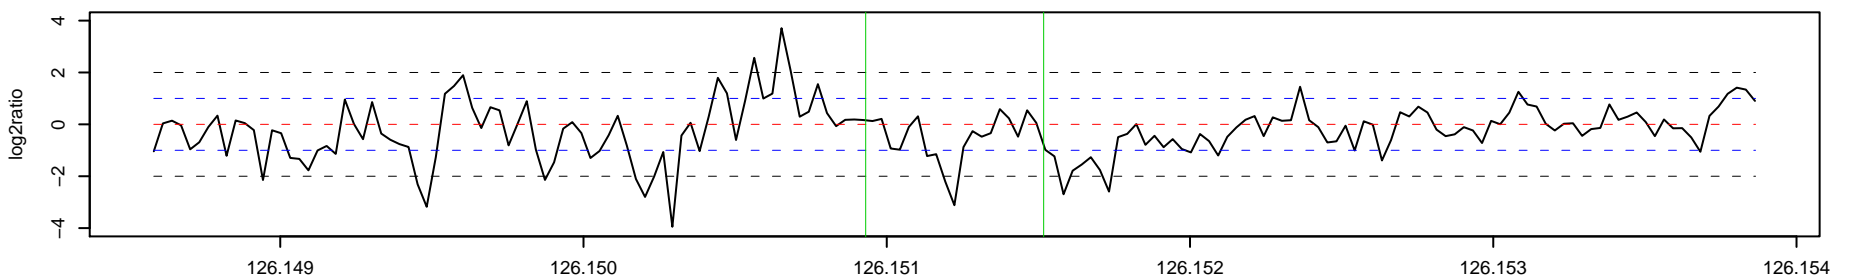

507\_AK1 Chr 12 : 126606373 – 126607018 , 646 bp (aCGH relative log2ratio= 0.50 )

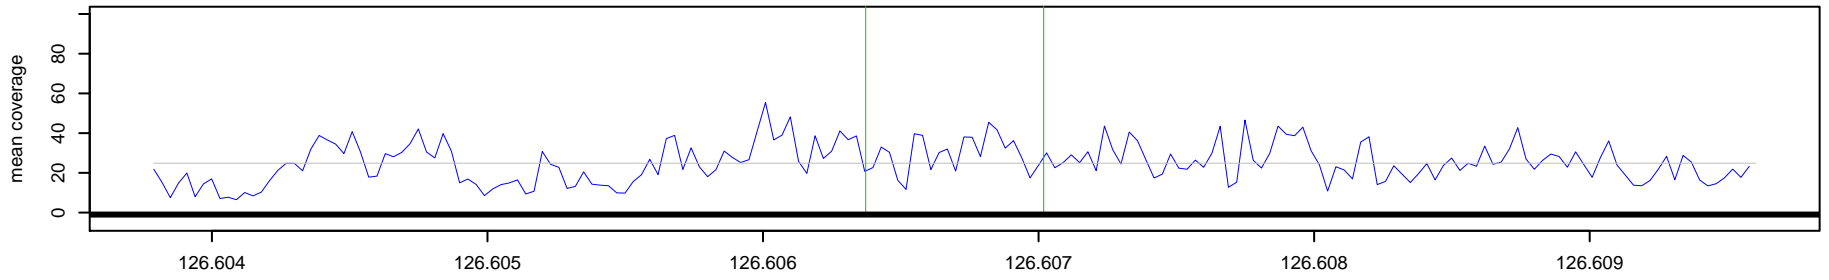

507\_NA10851 Chr 12 : 126606373 – 126607018 , 646 bp (aCGH relative log2ratio= 0.50 )

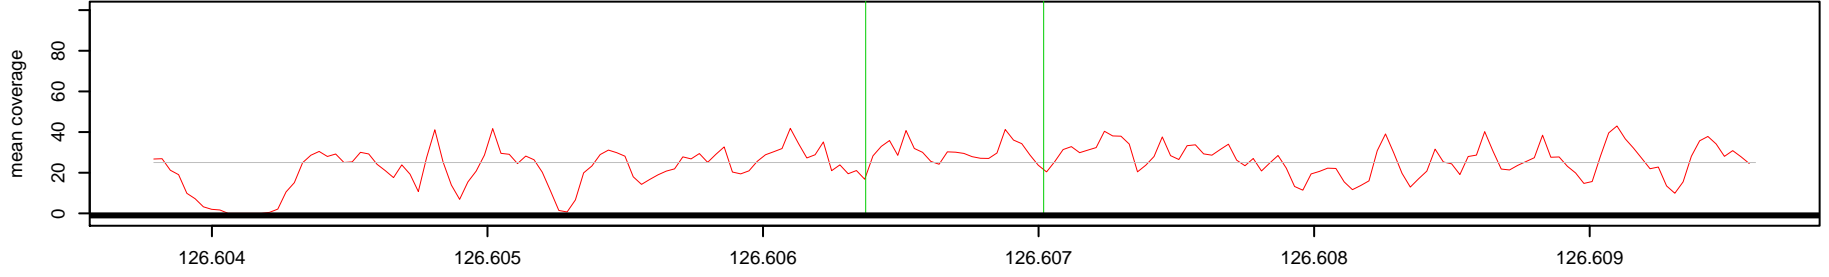

Log2( AK1 read depth / NA10851 read depth)

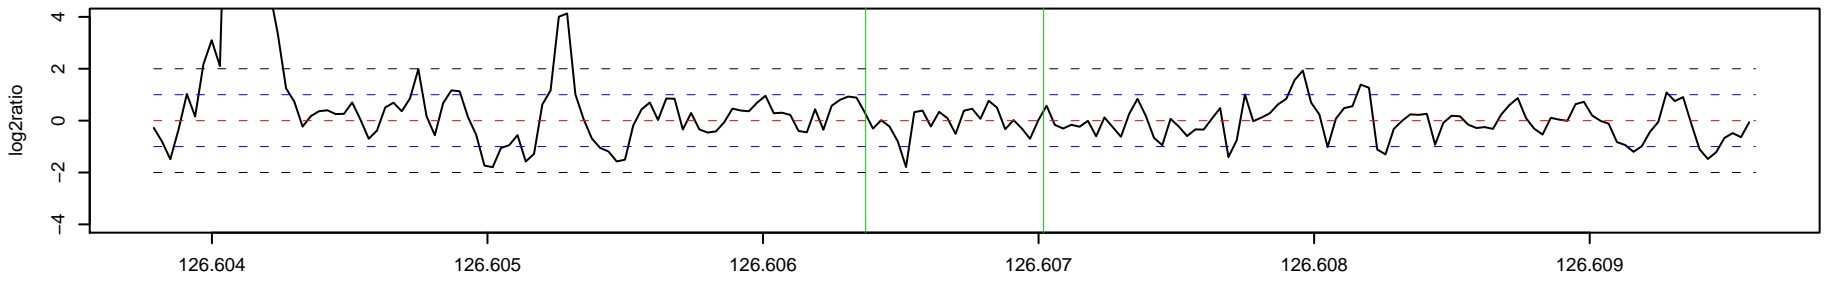

508\_AK1 Chr 13 : 25947932 – 25949808 , 1877 bp (aCGH relative log2ratio= 1.18 )

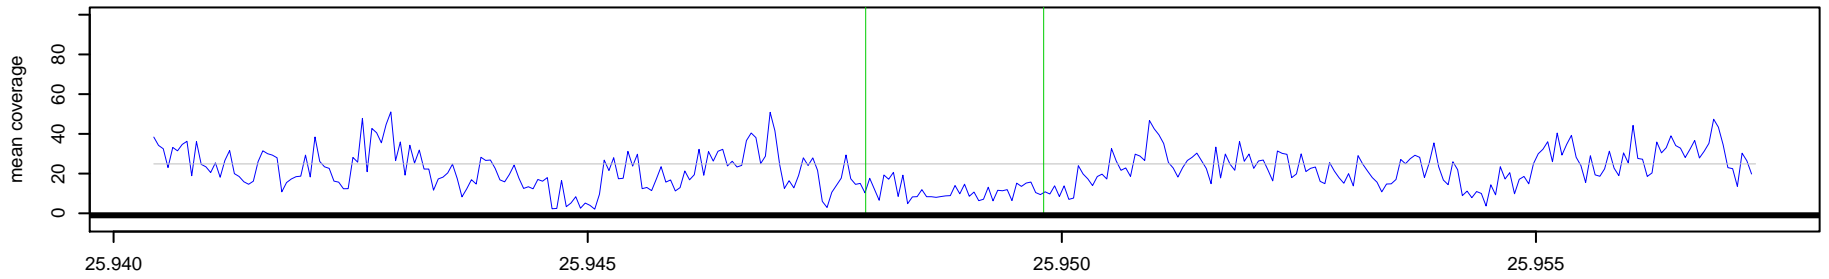

508\_NA10851 Chr 13 : 25947932 – 25949808 , 1877 bp (aCGH relative log2ratio= 1.18 )

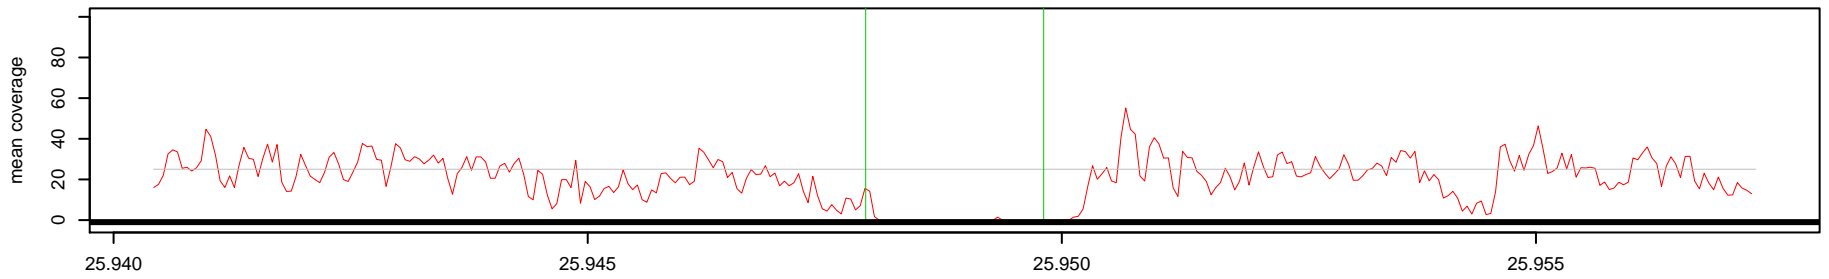

Log2( AK1 read depth / NA10851 read depth)

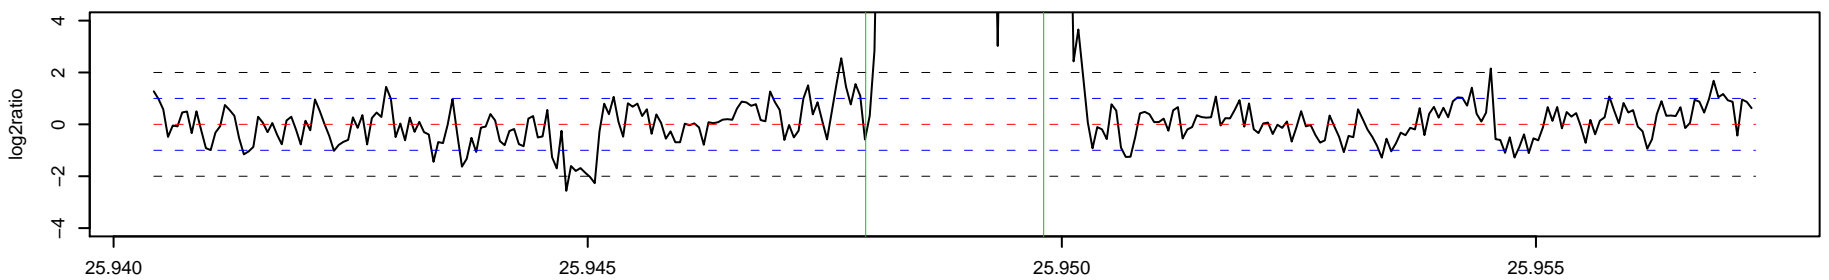

509\_AK1 Chr 13 : 37955309 – 37957872 , 2564 bp (aCGH relative log2ratio= 3.30 )

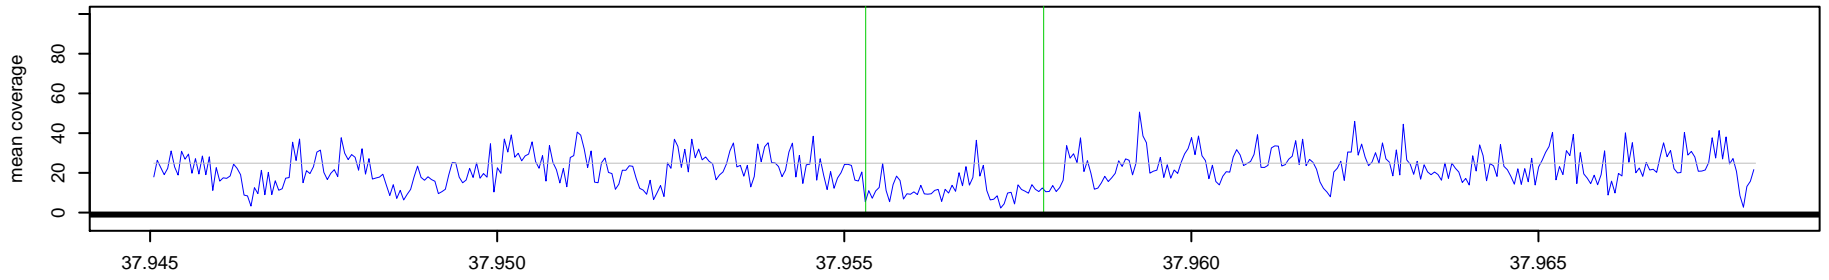

509\_NA10851 Chr 13 : 37955309 – 37957872 , 2564 bp (aCGH relative log2ratio= 3.30 )

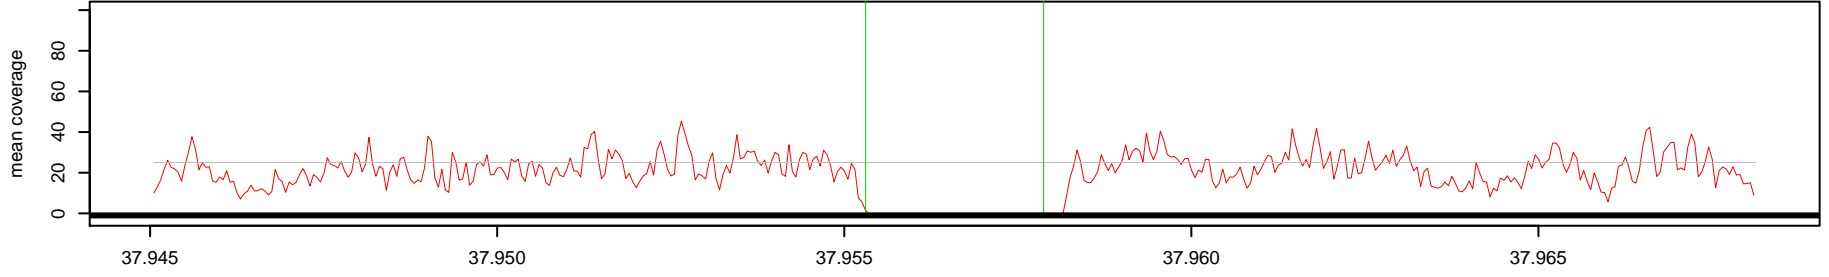

Log2( AK1 read depth / NA10851 read depth)

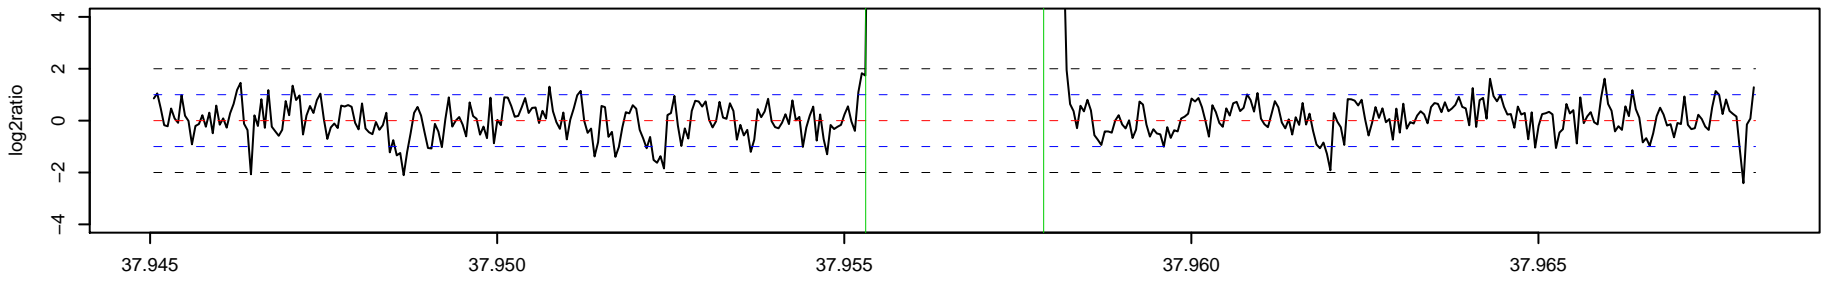

510\_AK1 Chr 13 : 38277297 – 38278543 , 1247 bp (aCGH relative log2ratio= -0.86 )

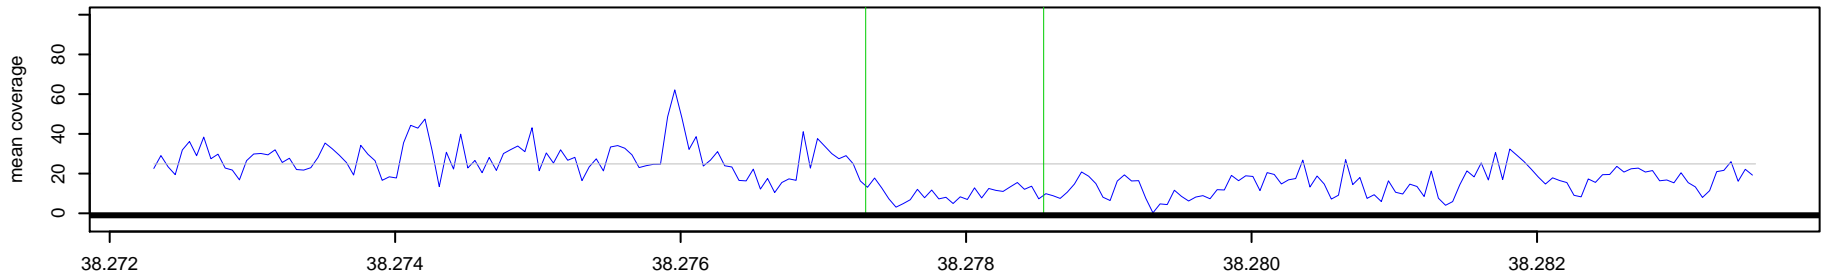

510\_NA10851 Chr 13 : 38277297 – 38278543 , 1247 bp (aCGH relative log2ratio= -0.86 )

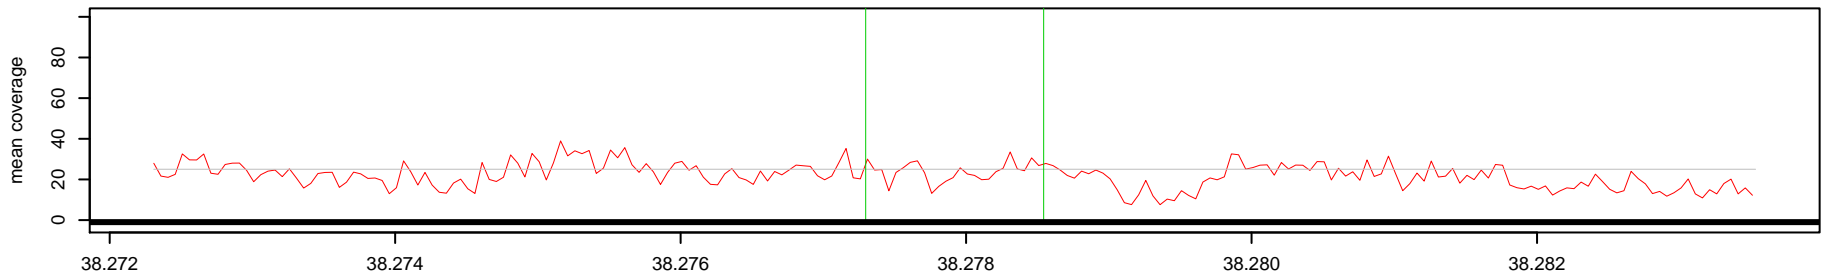

Log2( AK1 read depth / NA10851 read depth)

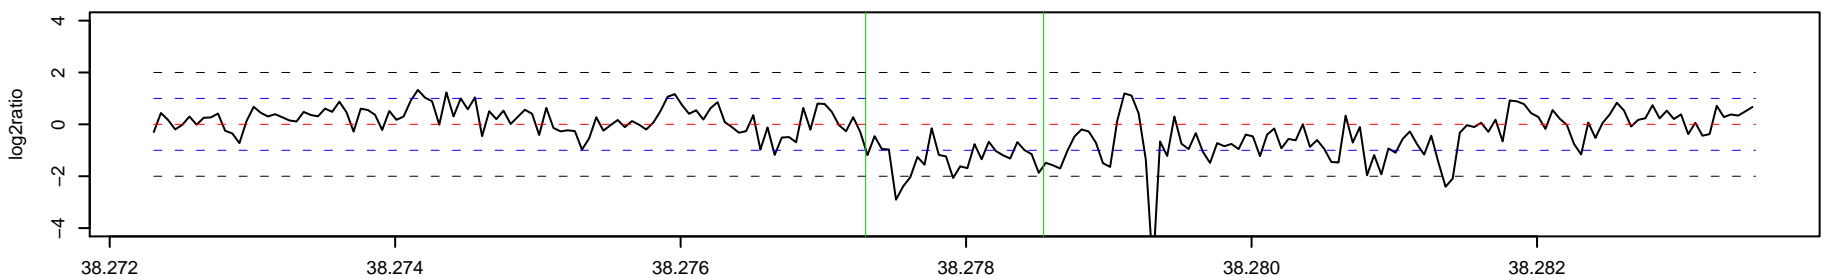

511\_AK1 Chr 13 : 38832389 - 38833533 , 1145 bp (aCGH relative log2ratio= -2.36 )

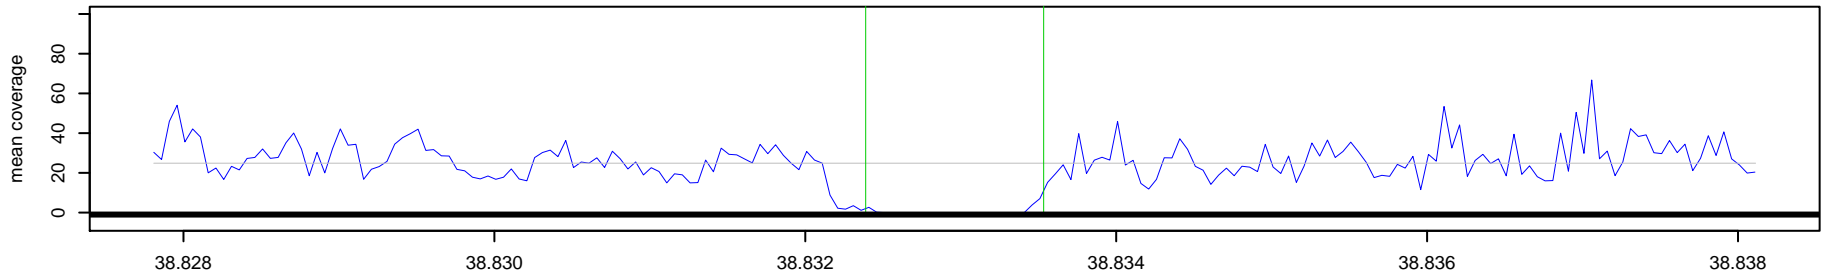

511\_NA10851 Chr 13 : 38832389 - 38833533 , 1145 bp (aCGH relative log2ratio= -2.36 )

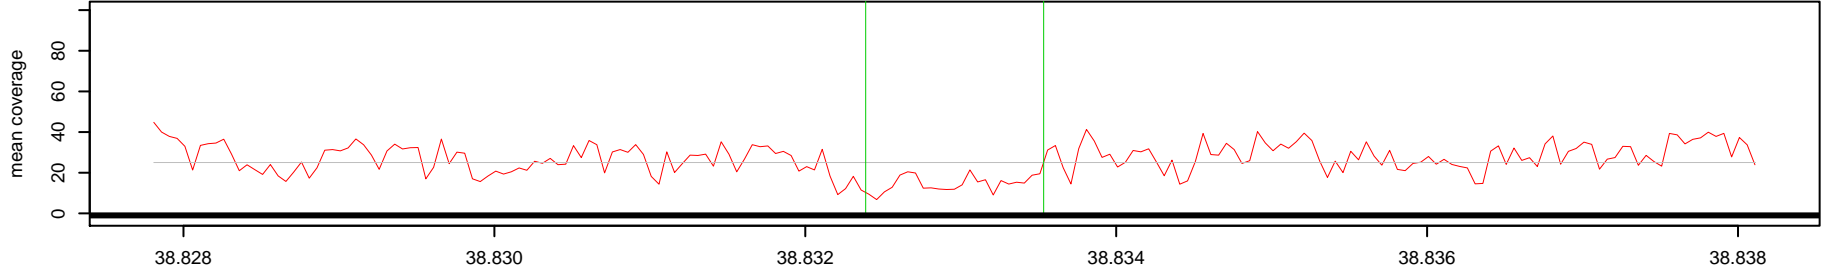

Log2( AK1 read depth / NA10851 read depth)

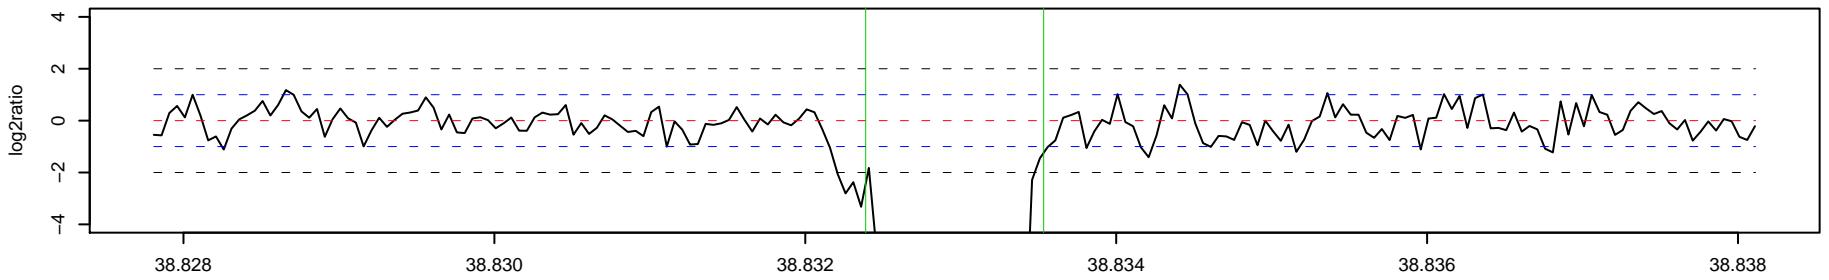

512\_AK1 Chr 13 : 42497091 - 42504785 , 7695 bp (aCGH relative log2ratio= 0.52 )

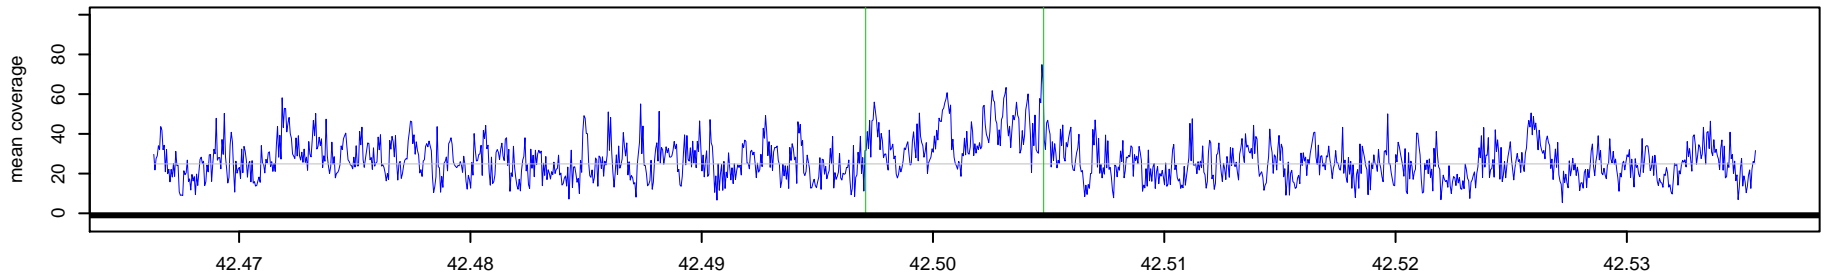

512\_NA10851 Chr 13 : 42497091 - 42504785 , 7695 bp (aCGH relative log2ratio= 0.52 )

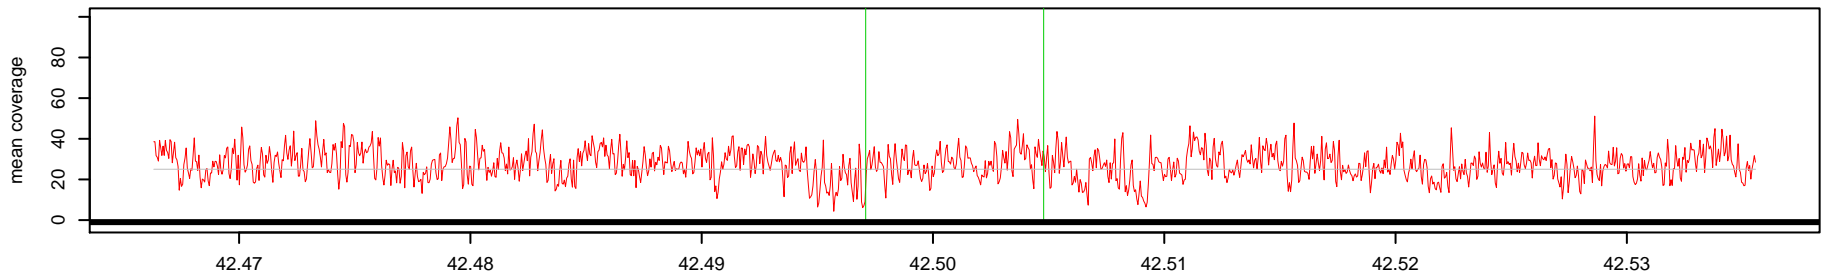

Log2( AK1 read depth / NA10851 read depth)

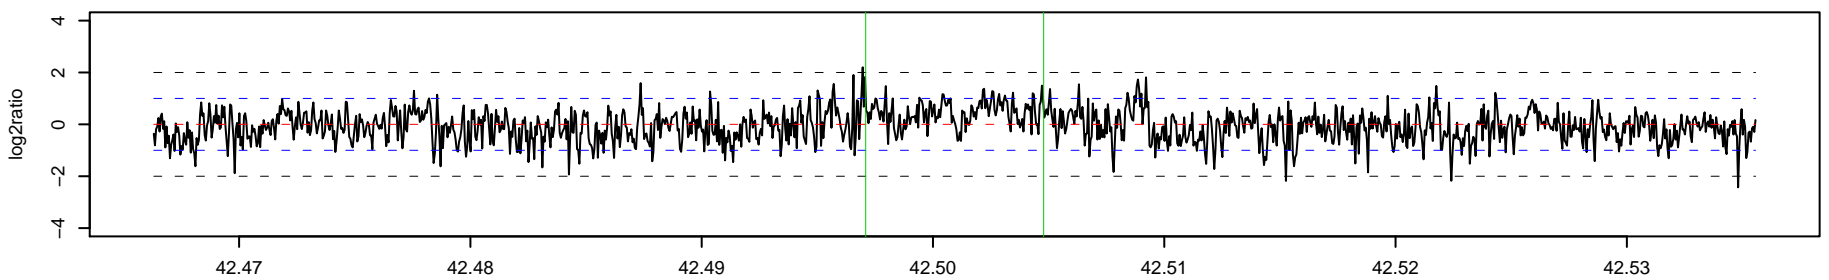

513\_AK1 Chr 13 : 49003102 – 49004134 , 1033 bp (aCGH relative log2ratio= -0.64 )

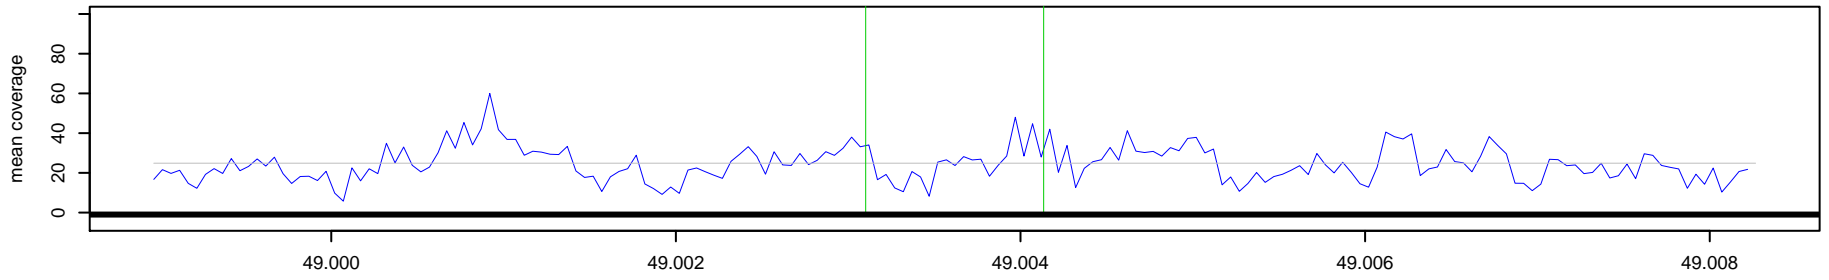

513\_NA10851 Chr 13 : 49003102 – 49004134 , 1033 bp (aCGH relative log2ratio= -0.64 )

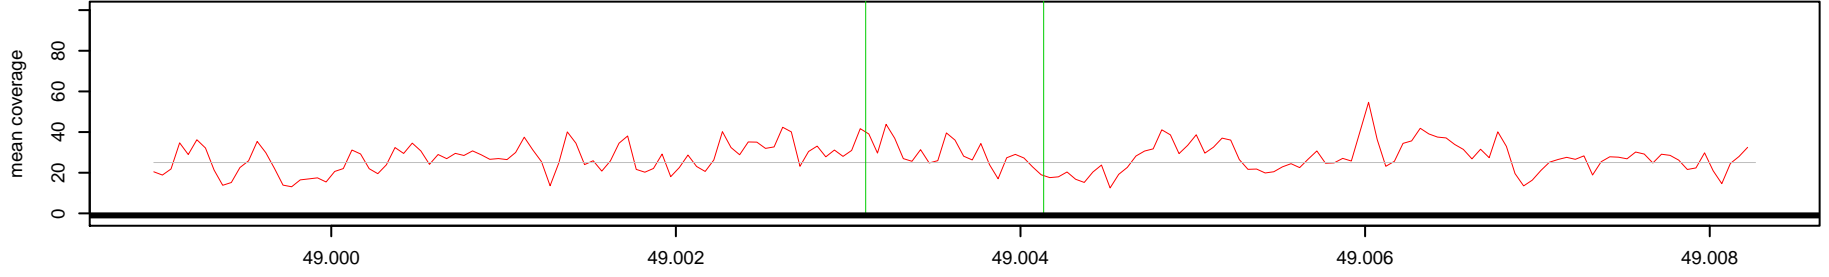

Log2( AK1 read depth / NA10851 read depth)

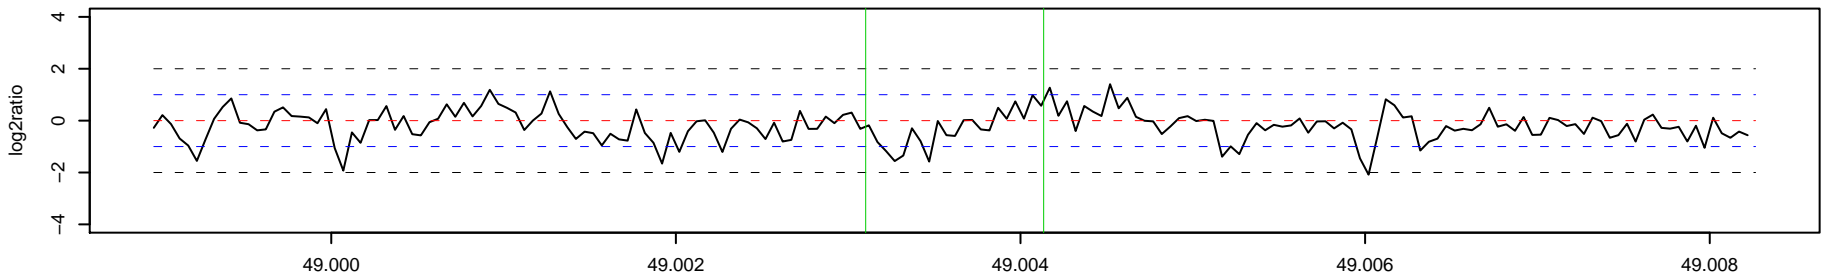

514\_AK1 Chr 13 : 49411048 – 49412922 , 1875 bp (aCGH relative log2ratio= 0.87 )

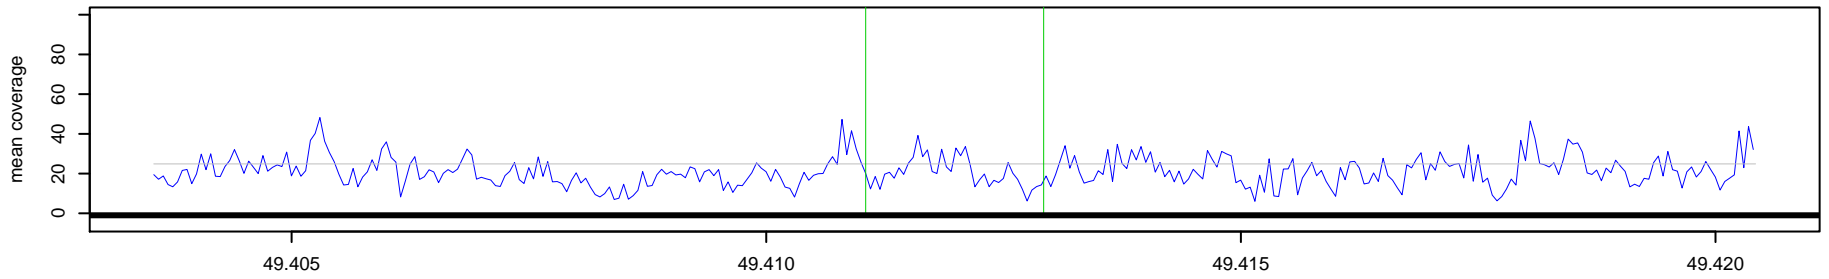

514\_NA10851 Chr 13 : 49411048 – 49412922 , 1875 bp (aCGH relative log2ratio= 0.87 )

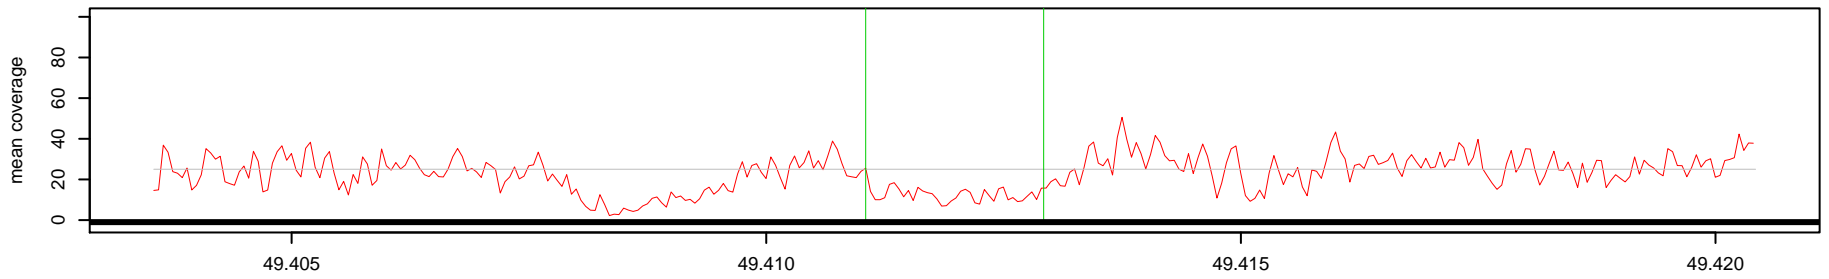

Log2( AK1 read depth / NA10851 read depth)

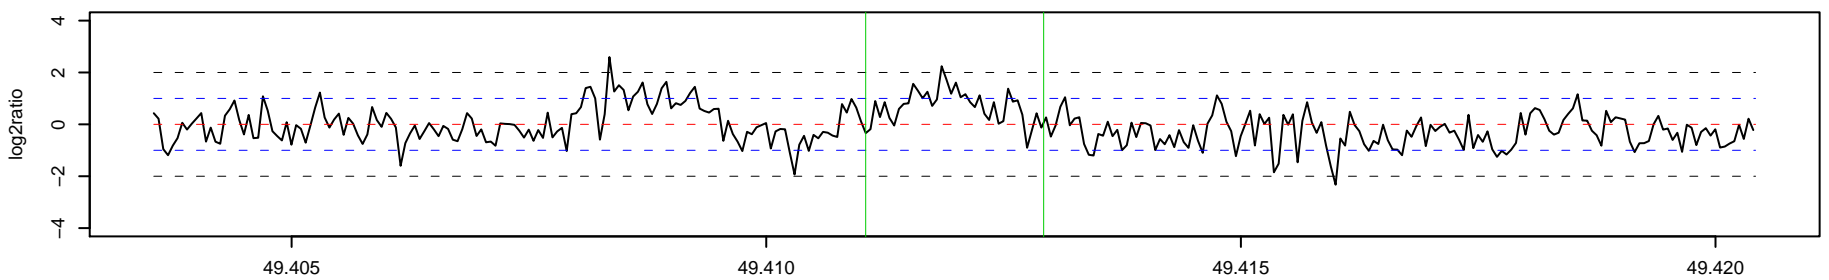

515\_AK1 Chr 13 : 51755315 – 51824869 , 69555 bp (aCGH relative log2ratio= 0.48 )

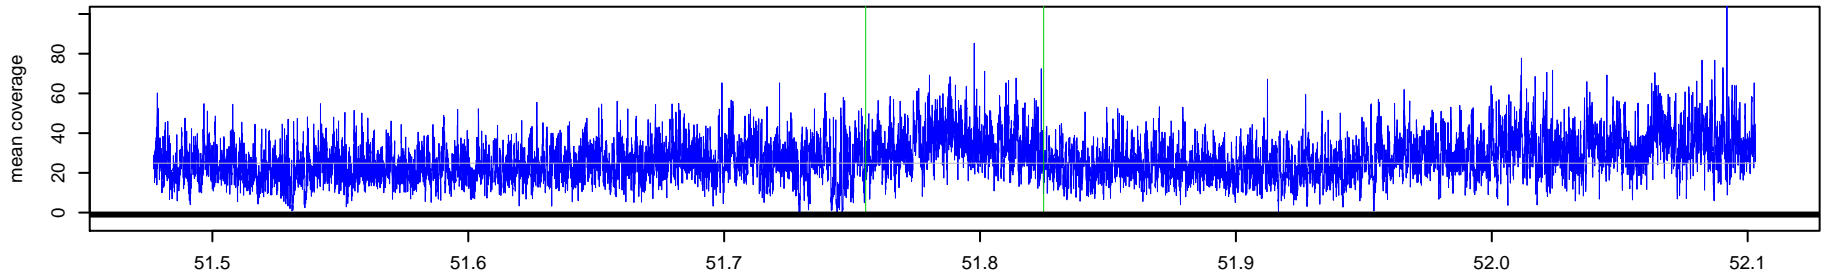

515\_NA10851 Chr 13 : 51755315 – 51824869 , 69555 bp (aCGH relative log2ratio= 0.48 )

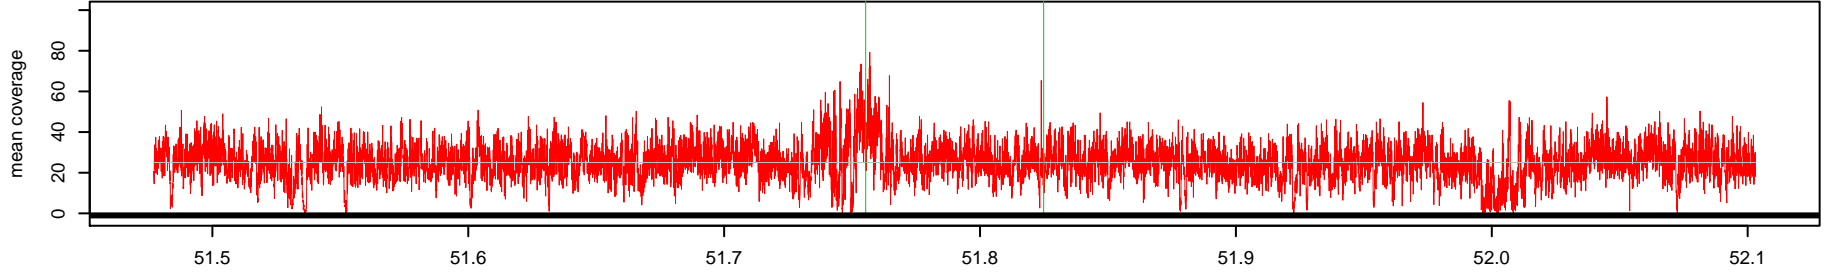

Log2( AK1 read depth / NA10851 read depth)

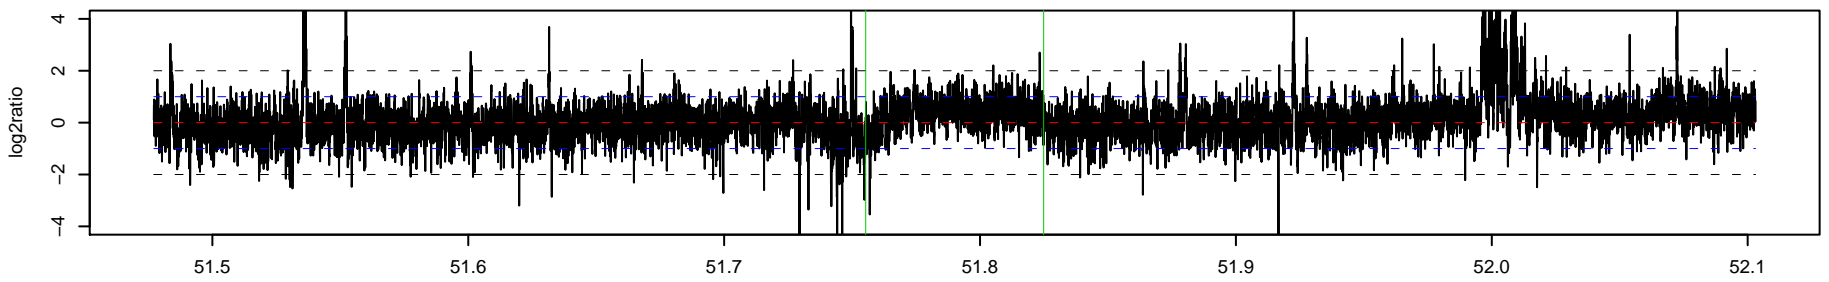

516\_AK1 Chr 13 : 51951549 – 52138552 , 187004 bp (aCGH relative log2ratio= 0.51 )

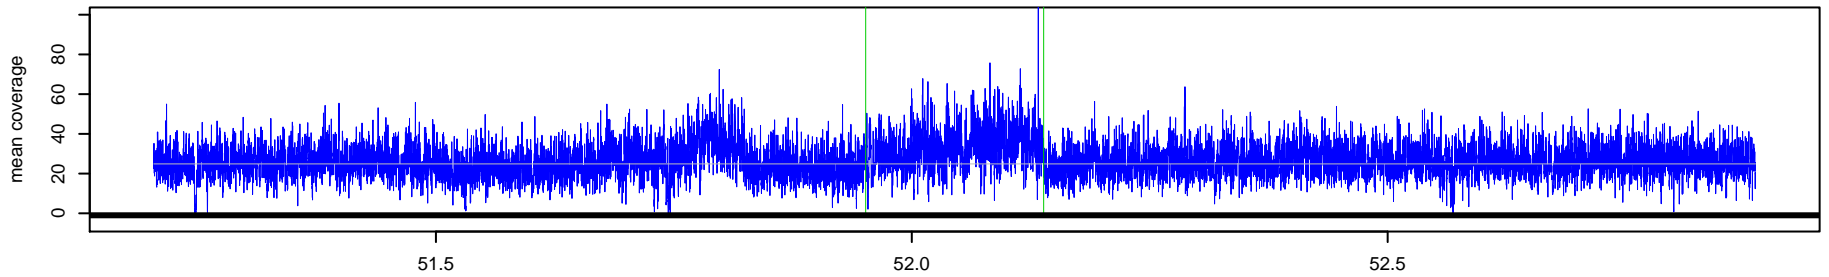

516\_NA10851 Chr 13 : 51951549 – 52138552 , 187004 bp (aCGH relative log2ratio= 0.51 )

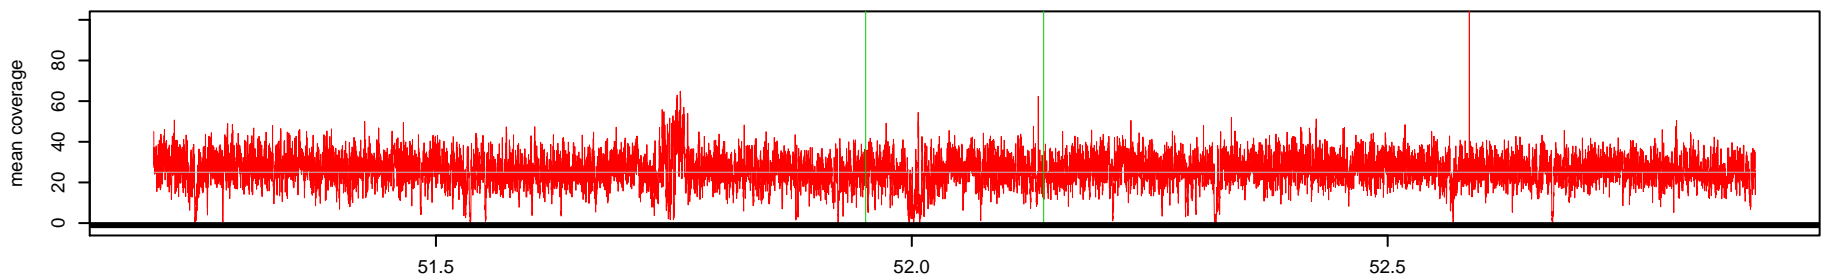

Log2( AK1 read depth / NA10851 read depth)

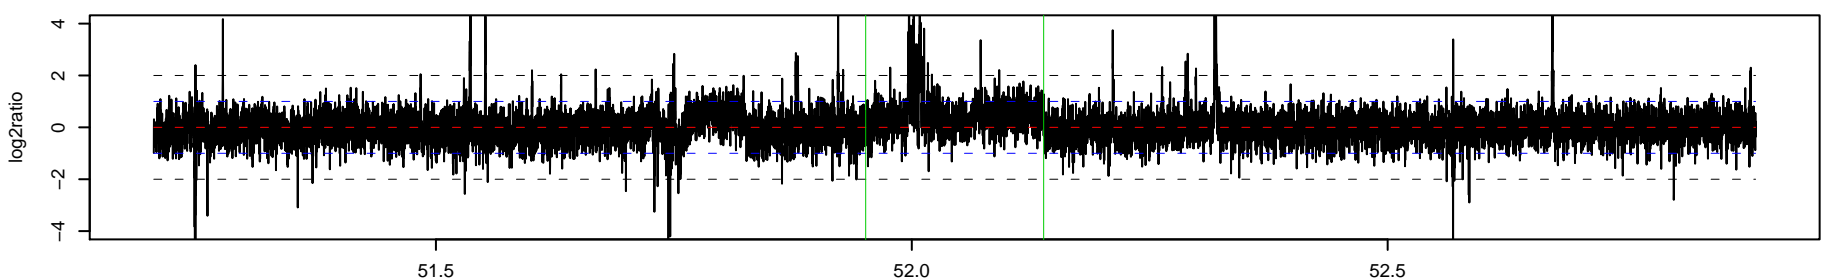

517\_AK1 Chr 13 : 61552804 – 6155487 , 2684 bp (aCGH relative log2ratio= 0.96 )

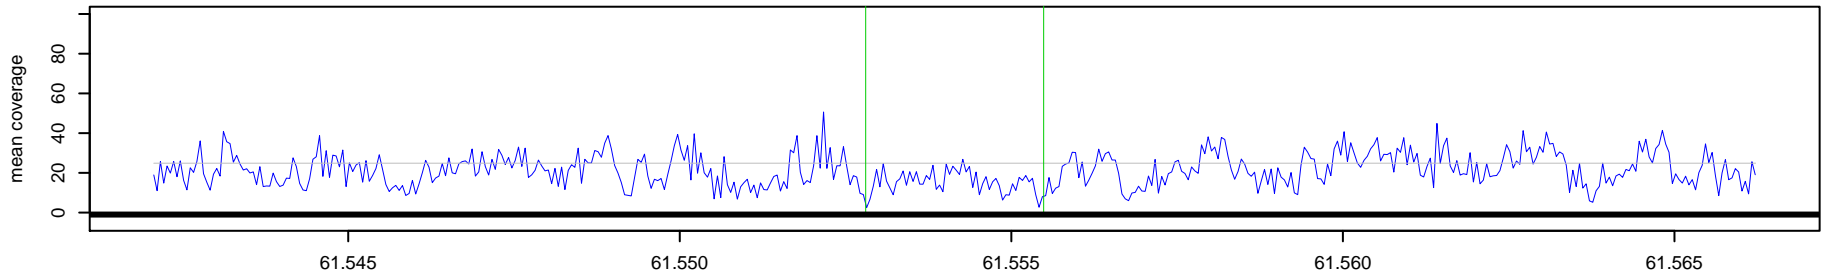

517\_NA10851 Chr 13 : 61552804 – 6155487 , 2684 bp (aCGH relative log2ratio= 0.96 )

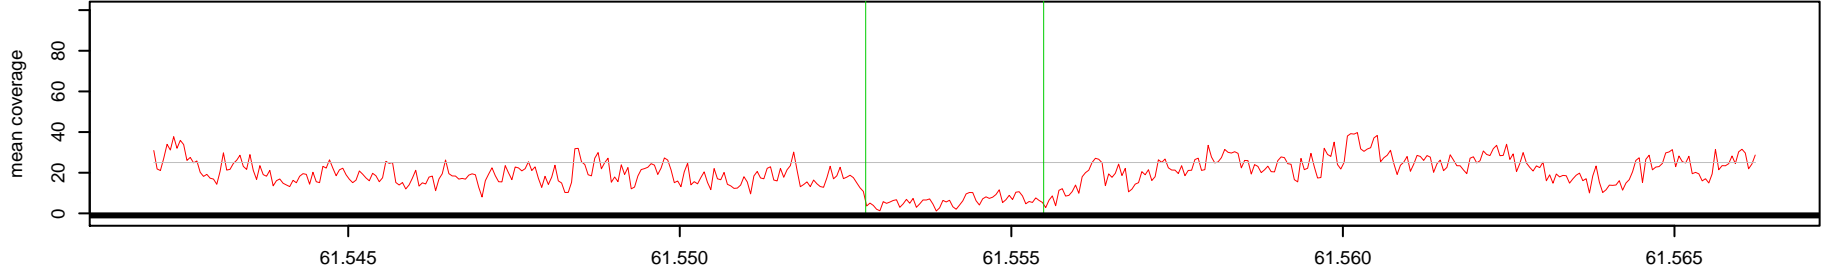

Log2( AK1 read depth / NA10851 read depth)

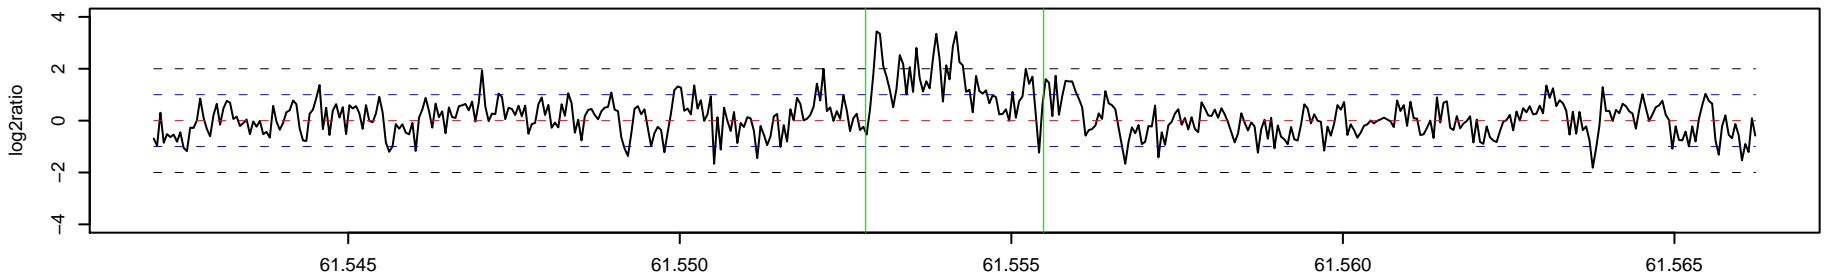

518\_AK1 Chr 13 : 62501132 – 62547070 , 45939 bp (aCGH relative log2ratio= 0.47 )

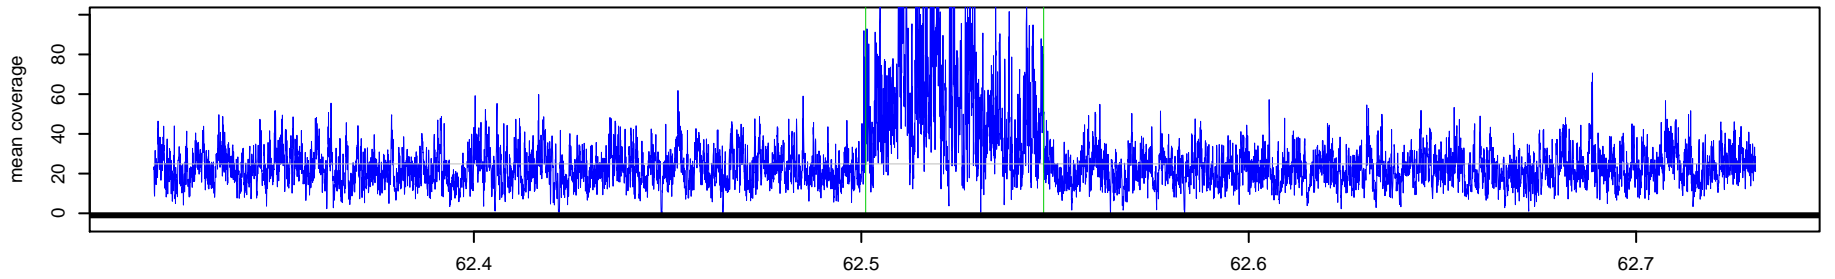

518\_NA10851 Chr 13 : 62501132 – 62547070 , 45939 bp (aCGH relative log2ratio= 0.47 )

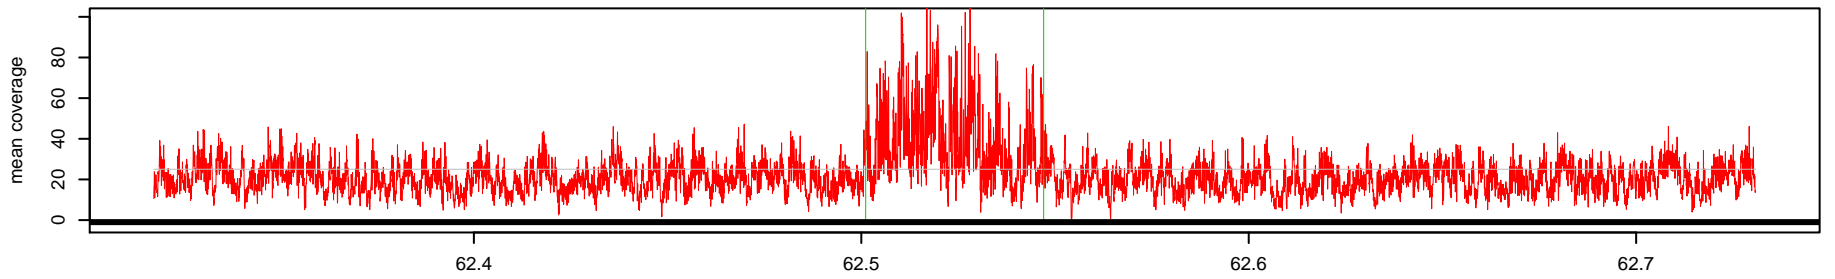

Log2( AK1 read depth / NA10851 read depth)

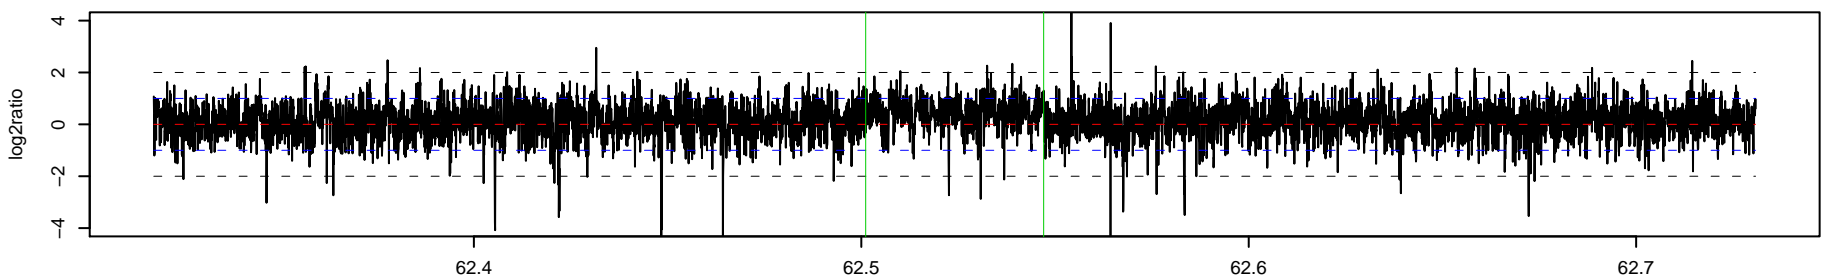

519\_AK1 Chr 13 : 69634151 – 69673460 , 39310 bp (aCGH relative log2ratio= 0.97 )

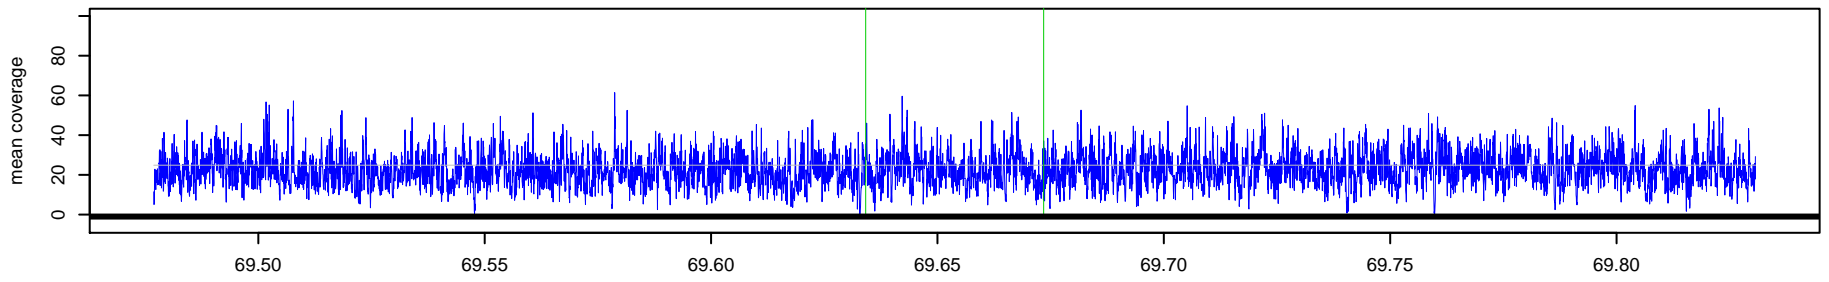

519\_NA10851 Chr 13 : 69634151 – 69673460 , 39310 bp (aCGH relative log2ratio= 0.97 )

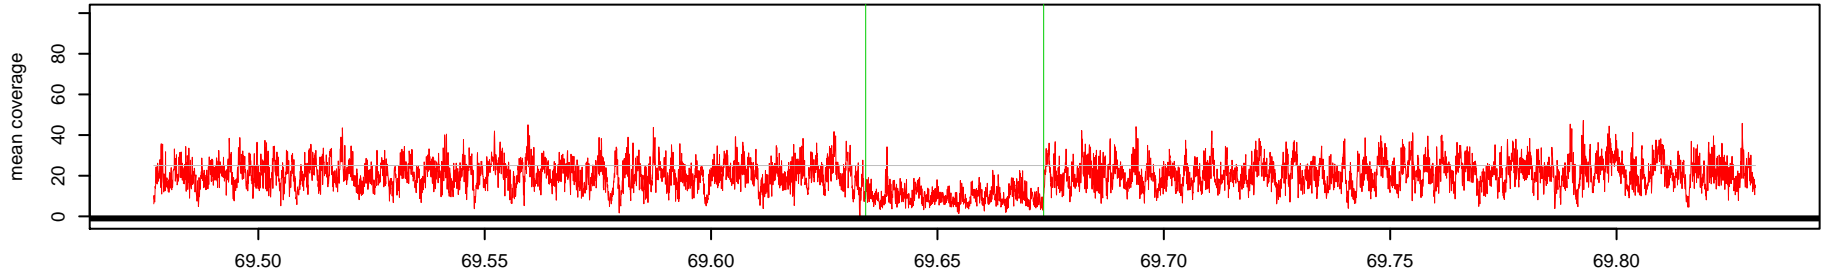

Log2( AK1 read depth / NA10851 read depth)

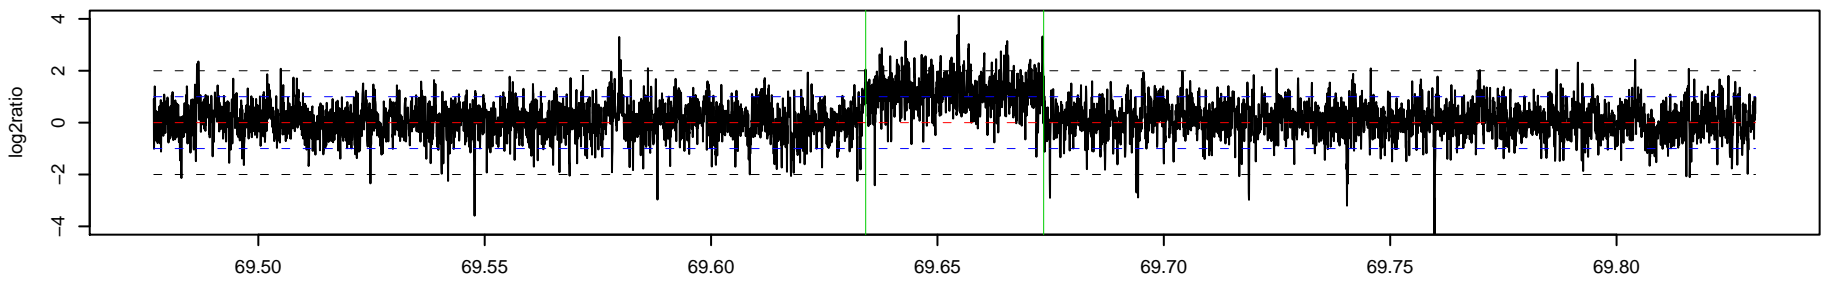

520\_AK1 Chr 13 : 70096000 – 70097971 , 1972 bp (aCGH relative log2ratio= -0.80 )

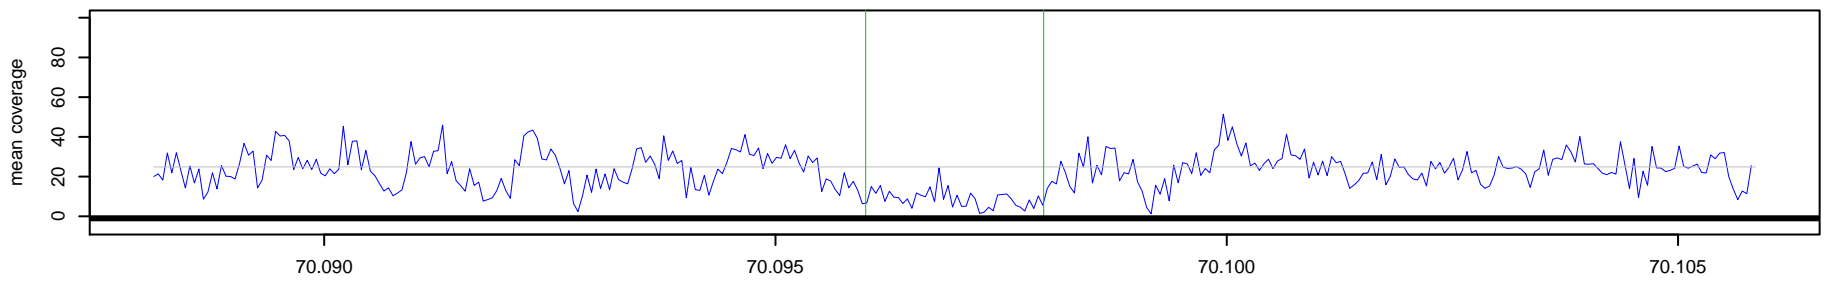

520\_NA10851 Chr 13 : 70096000 – 70097971 , 1972 bp (aCGH relative log2ratio= -0.80 )

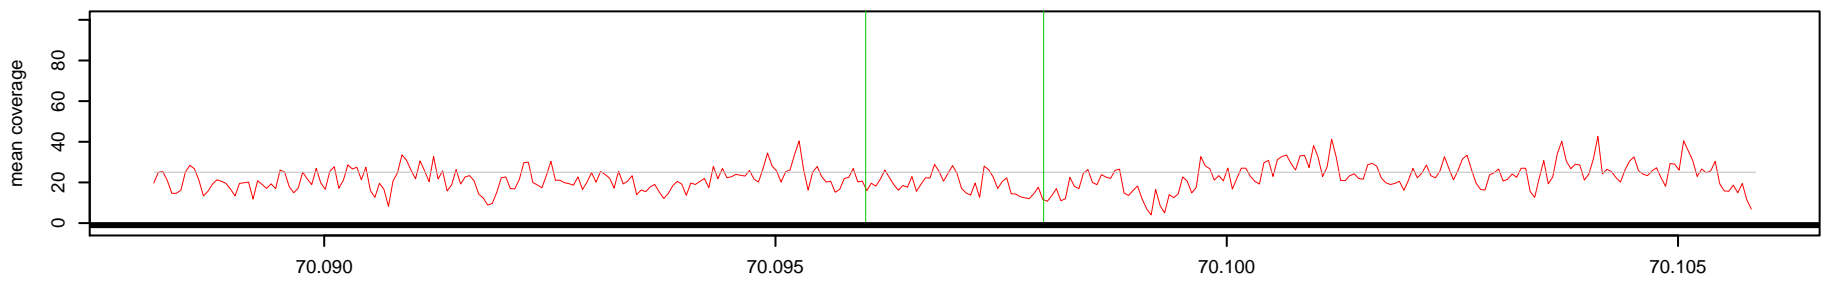

Log2( AK1 read depth / NA10851 read depth)

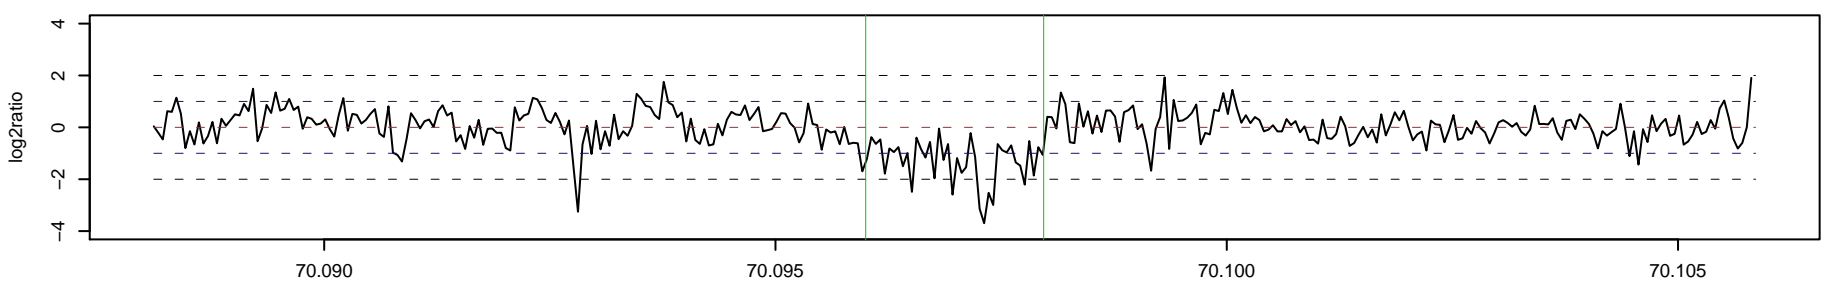



521 \_ AK1 Chr 13 : 71743585 – 71744901 , 1317 bp (aCGH relative log2ratio= 3.14 )

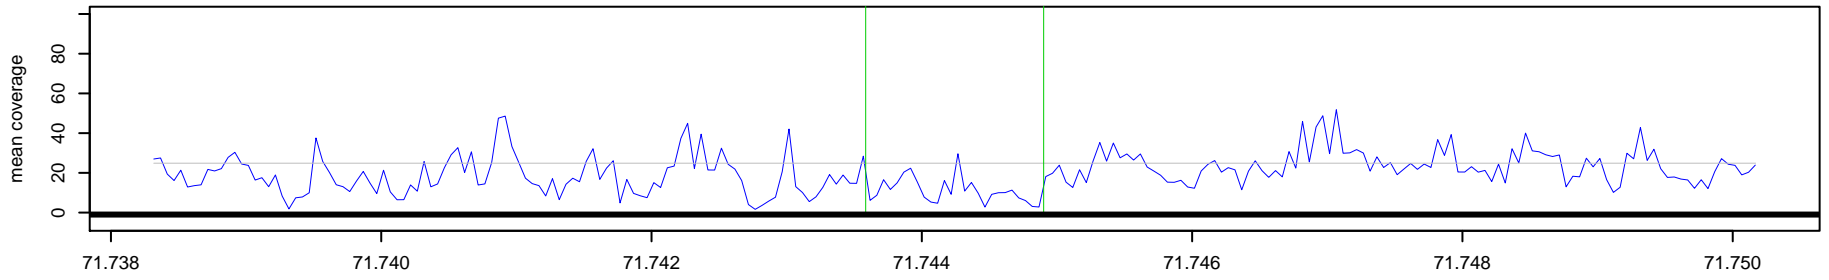

521 \_ NA10851 Chr 13 : 71743585 – 71744901 , 1317 bp (aCGH relative log2ratio= 3.14 )

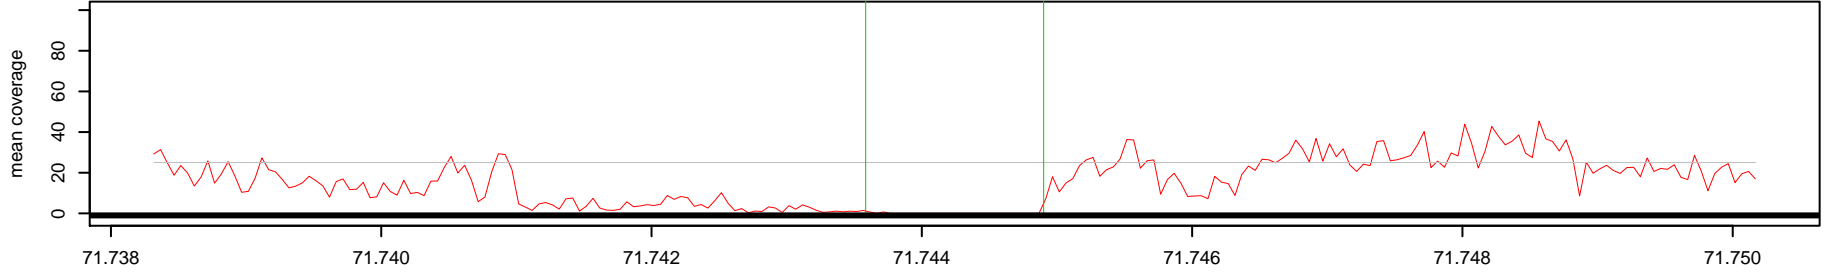

Log2( AK1 read depth / NA10851 read depth)

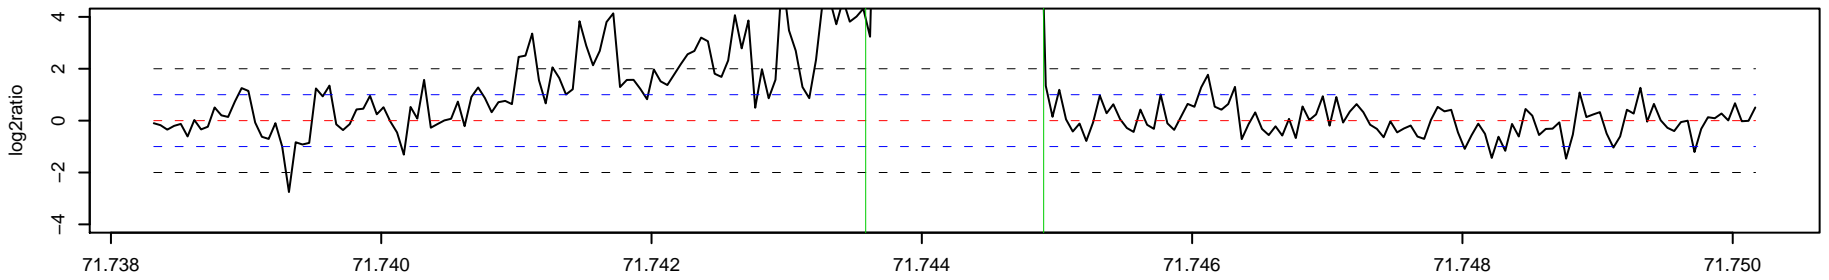

522 \_ AK1 Chr 13 : 83881098 – 83883323 , 2226 bp (aCGH relative log2ratio= 0.56 )

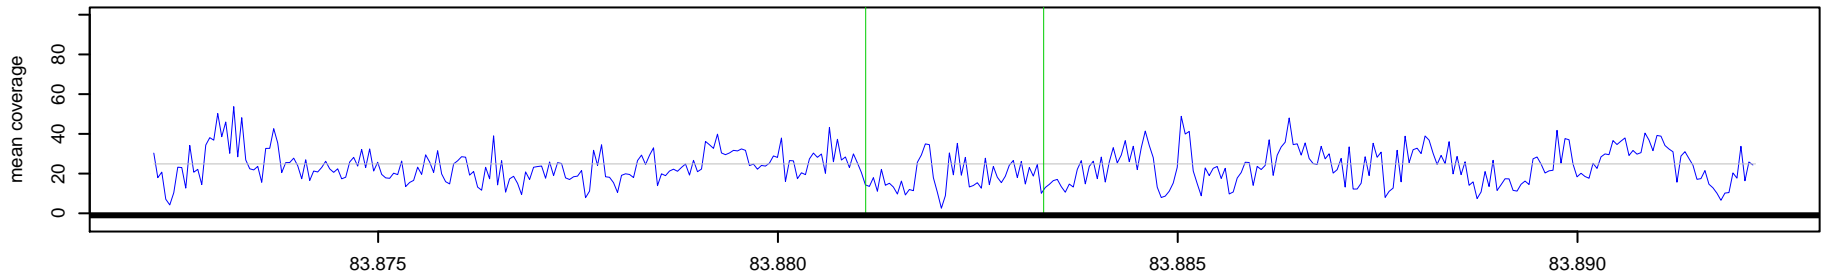

522 \_ NA10851 Chr 13 : 83881098 – 83883323 , 2226 bp (aCGH relative log2ratio= 0.56 )

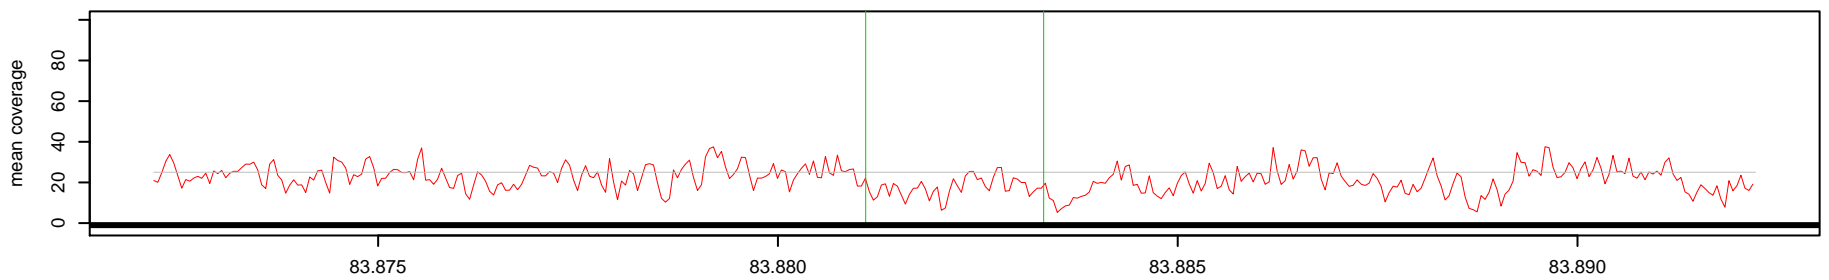

Log2( AK1 read depth / NA10851 read depth)

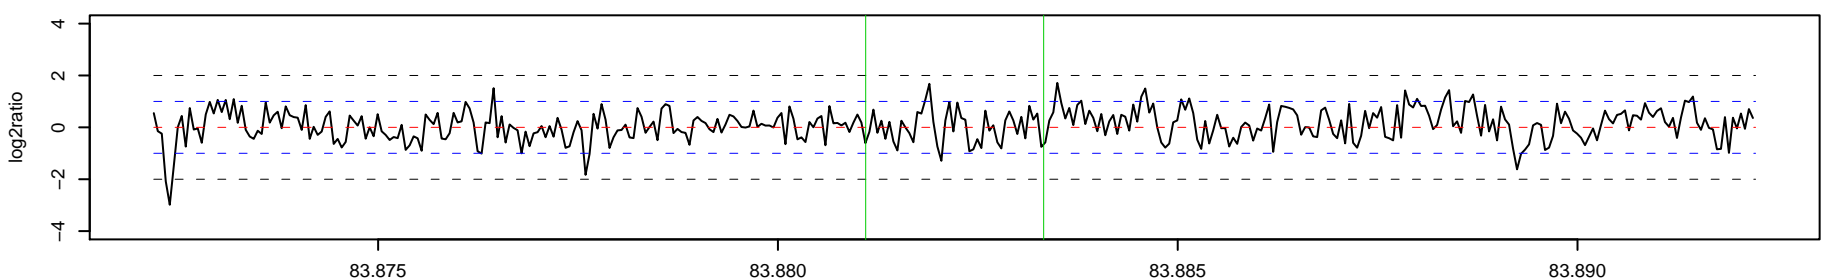

523\_AK1 Chr 13 : 86265530 – 86267615 , 2086 bp (aCGH relative log2ratio= 0.51 )

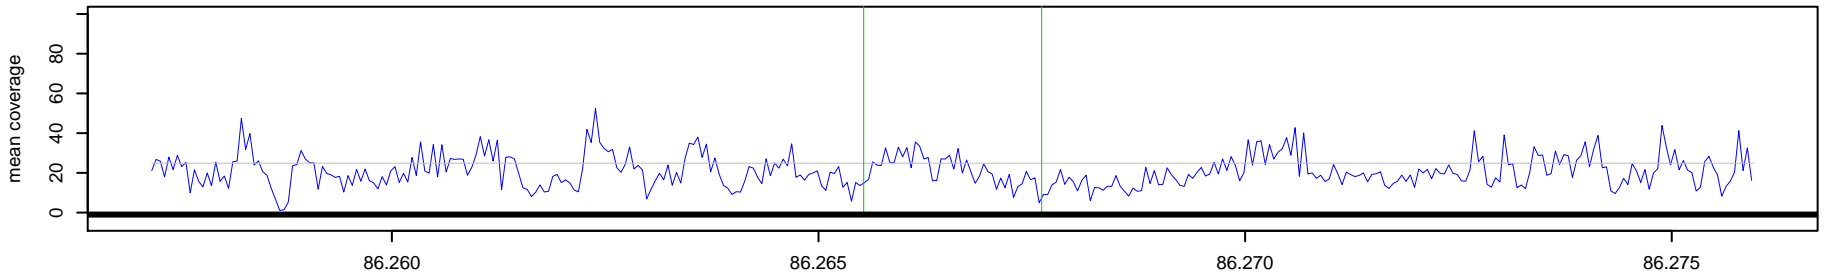

523\_NA10851 Chr 13 : 86265530 – 86267615 , 2086 bp (aCGH relative log2ratio= 0.51 )

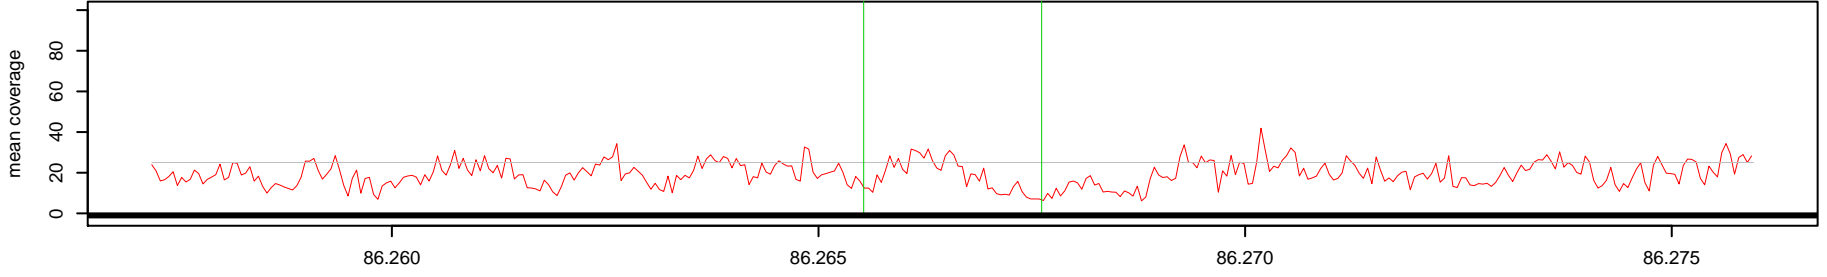

Log2( AK1 read depth / NA10851 read depth)

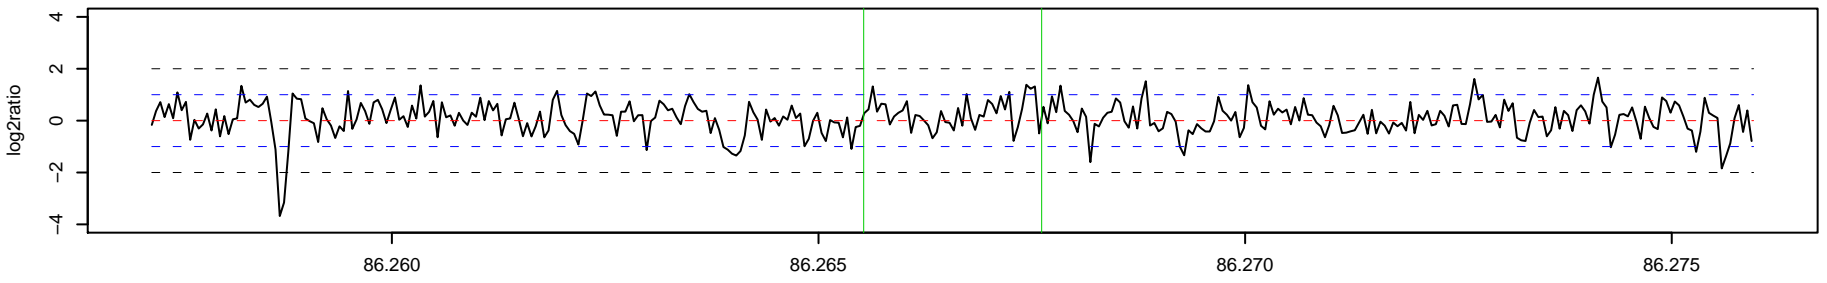

524\_AK1 Chr 13 : 88219917 – 88220947 , 1031 bp (aCGH relative log2ratio= 1.08 )

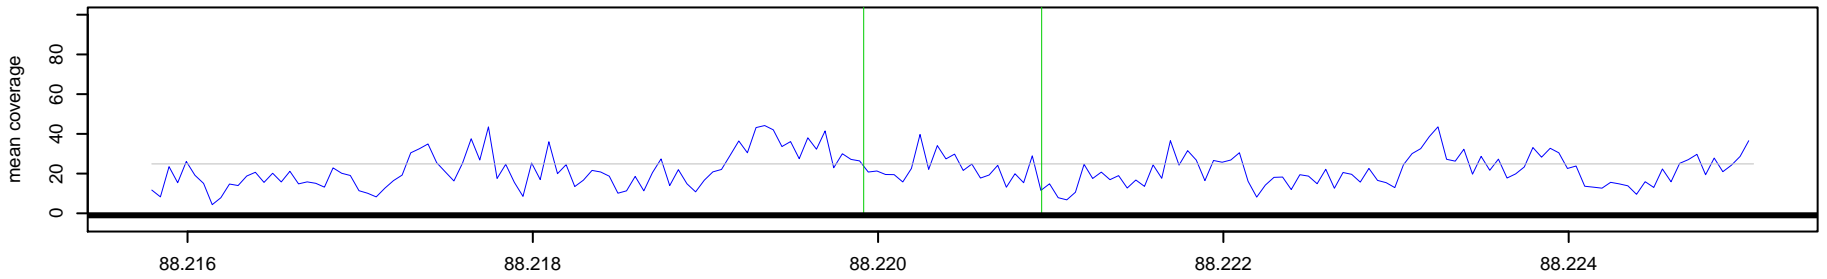

524\_NA10851 Chr 13 : 88219917 – 88220947 , 1031 bp (aCGH relative log2ratio= 1.08 )

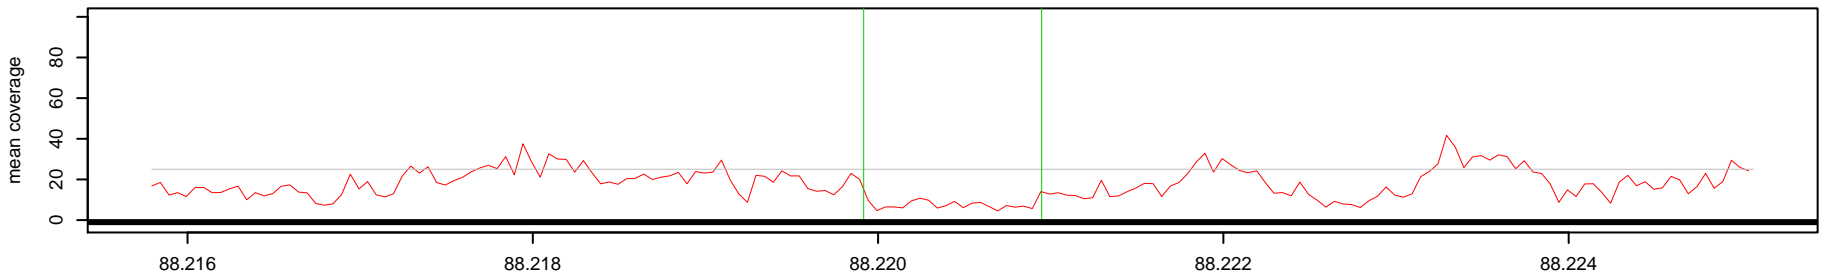

Log2( AK1 read depth / NA10851 read depth)

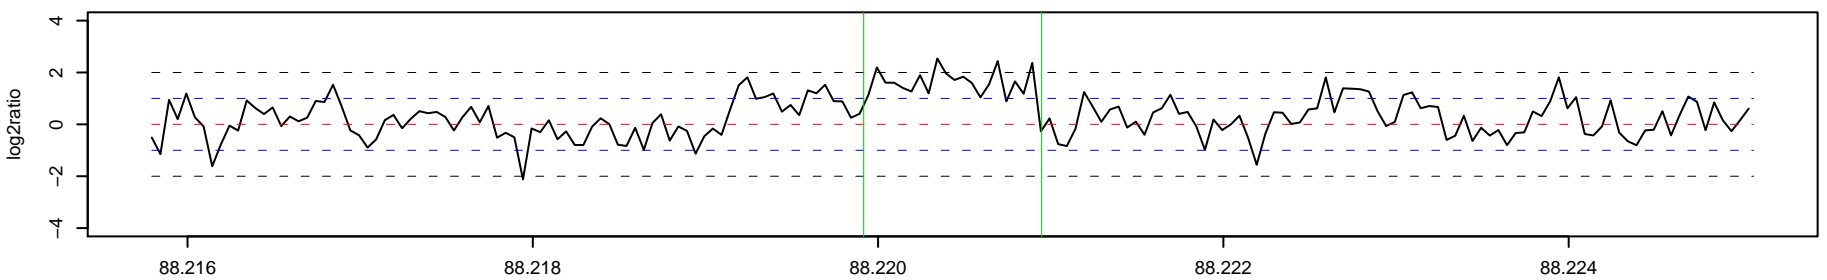

525\_AK1 Chr 13 : 94158554 - 94160724 , 2171 bp (aCGH relative log2ratio= 0.22 )

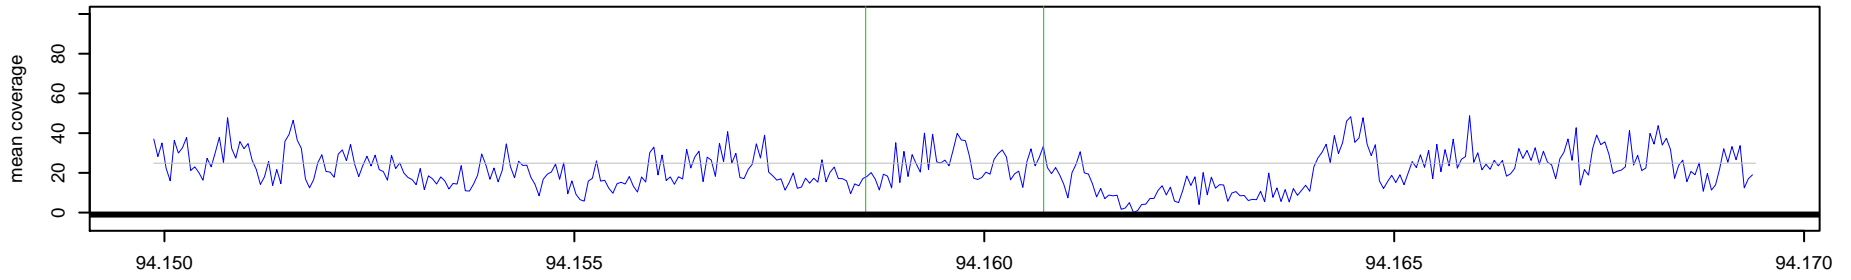

525\_NA10851 Chr 13 : 94158554 - 94160724 , 2171 bp (aCGH relative log2ratio= 0.22 )

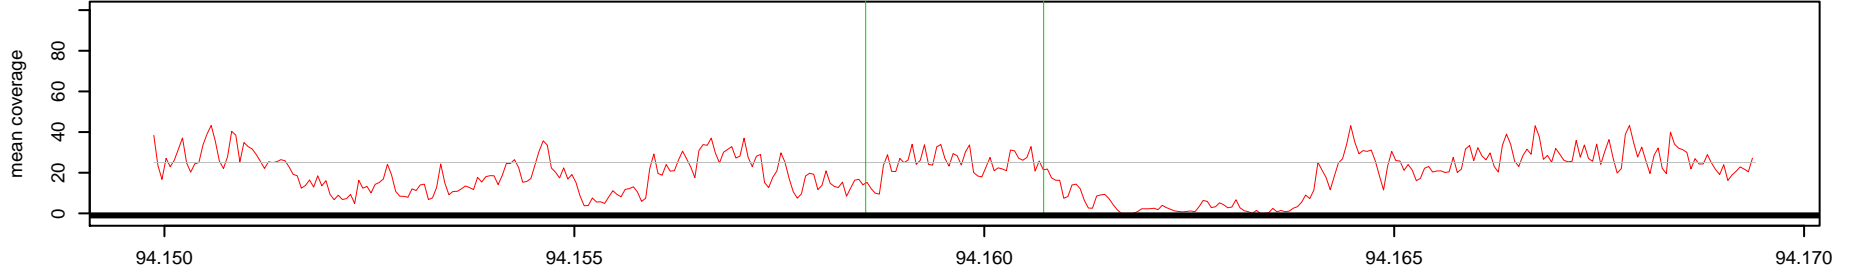

Log2( AK1 read depth / NA10851 read depth)

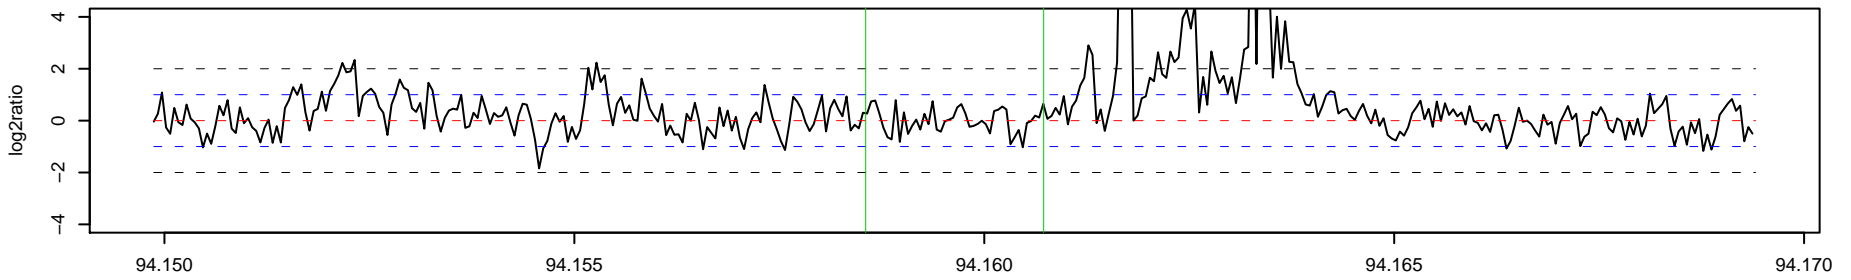

526\_AK1 Chr 13 : 102889781 - 102890229 , 449 bp (aCGH relative log2ratio= -2.04 )

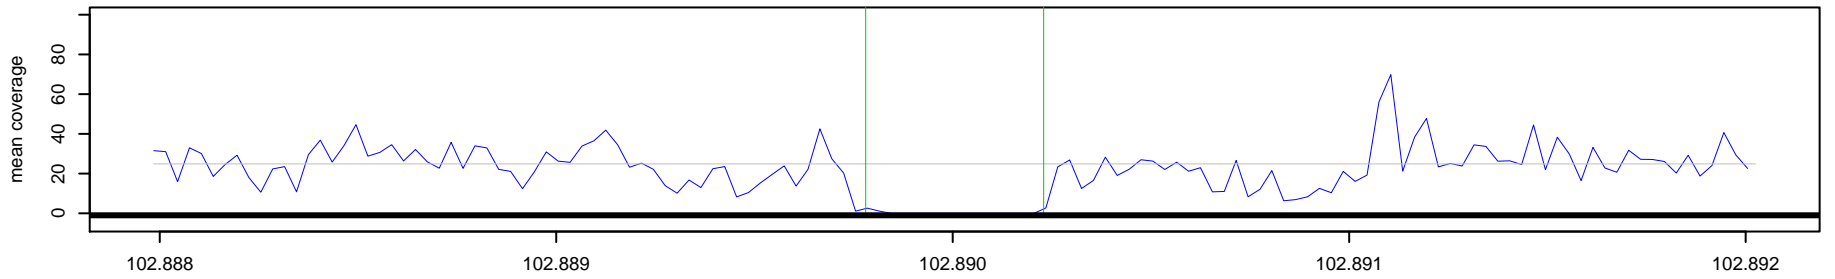

526\_NA10851 Chr 13 : 102889781 - 102890229 , 449 bp (aCGH relative log2ratio= -2.04 )

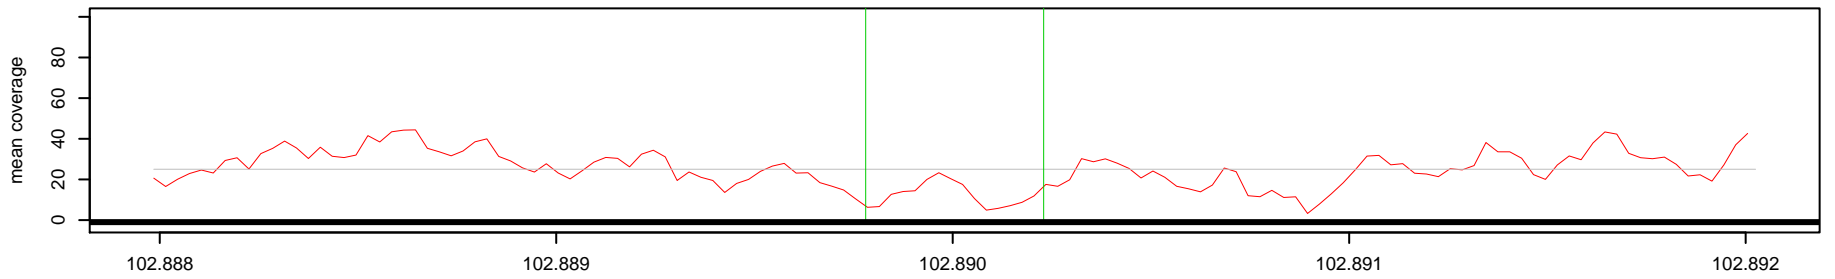

Log2( AK1 read depth / NA10851 read depth)

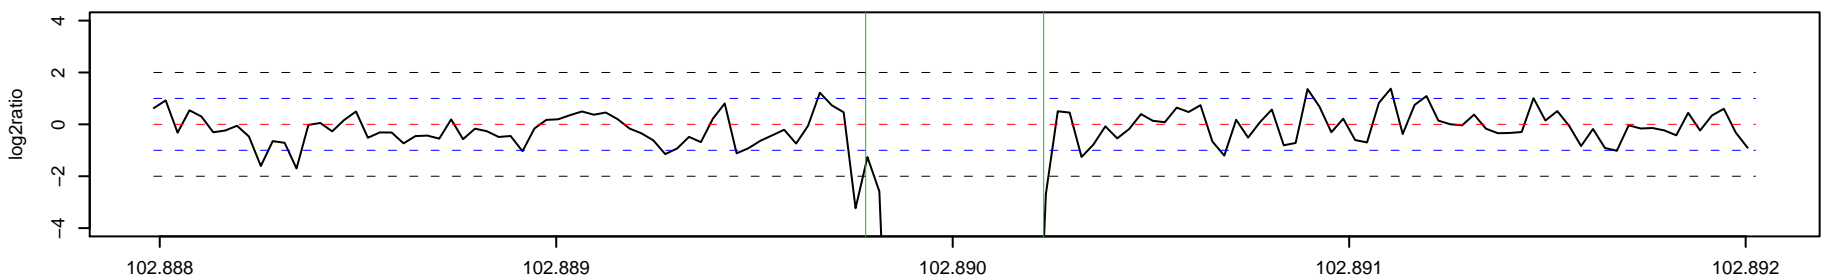

527 \_ AK1 Chr 13 : 113080360 – 113082798 , 2439 bp (aCGH relative log2ratio= 0.49 )

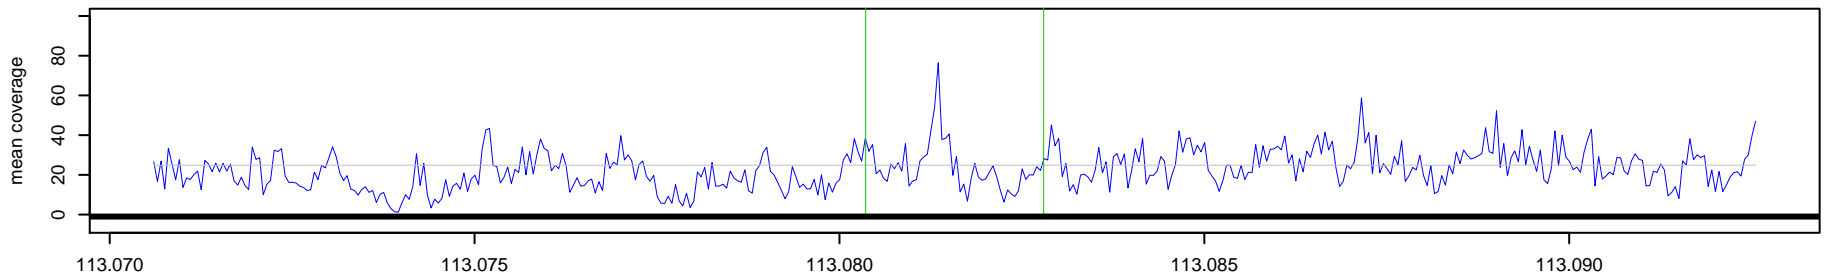

527 \_ NA10851 Chr 13 : 113080360 – 113082798 , 2439 bp (aCGH relative log2ratio= 0.49 )

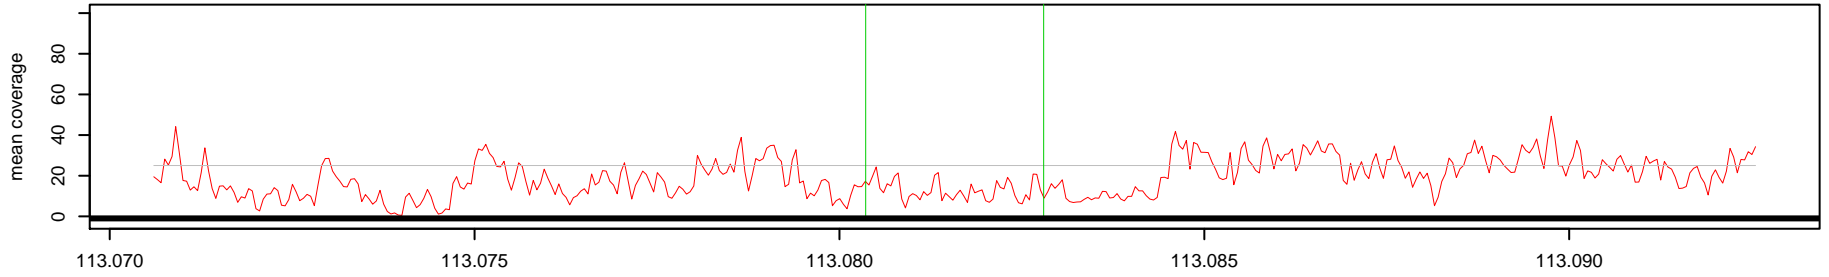

Log2( AK1 read depth / NA10851 read depth)

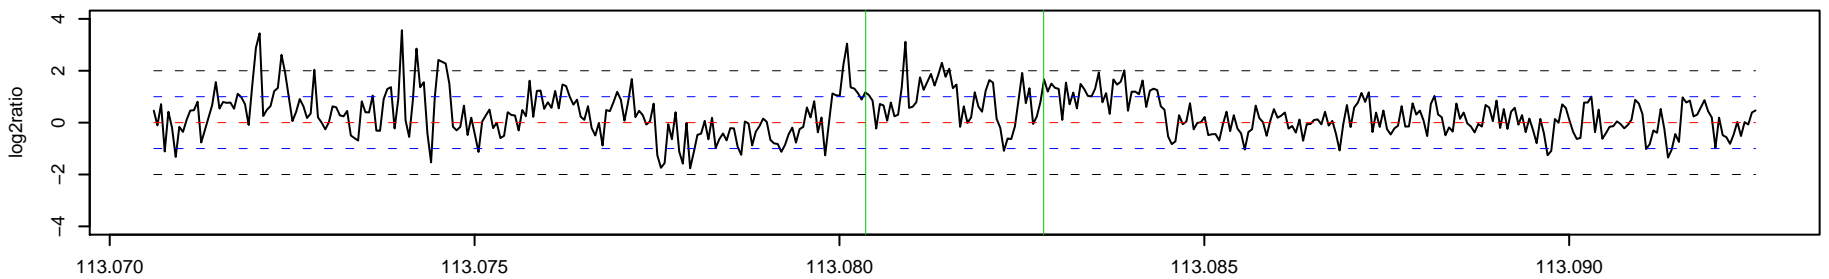

528 \_ AK1 Chr 13 : 114059980 – 114063300 , 3321 bp (aCGH relative log2ratio= -0.90 )

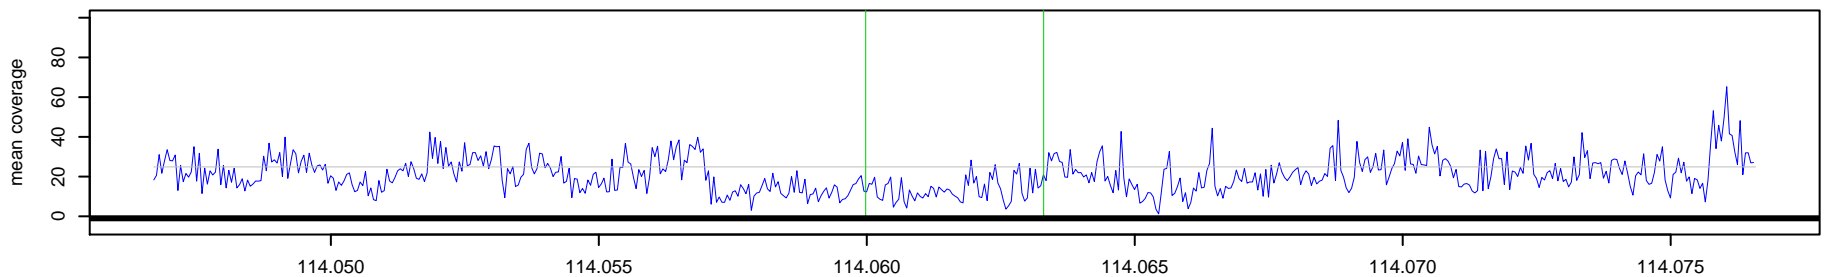

528 \_ NA10851 Chr 13 : 114059980 – 114063300 , 3321 bp (aCGH relative log2ratio= -0.90 )

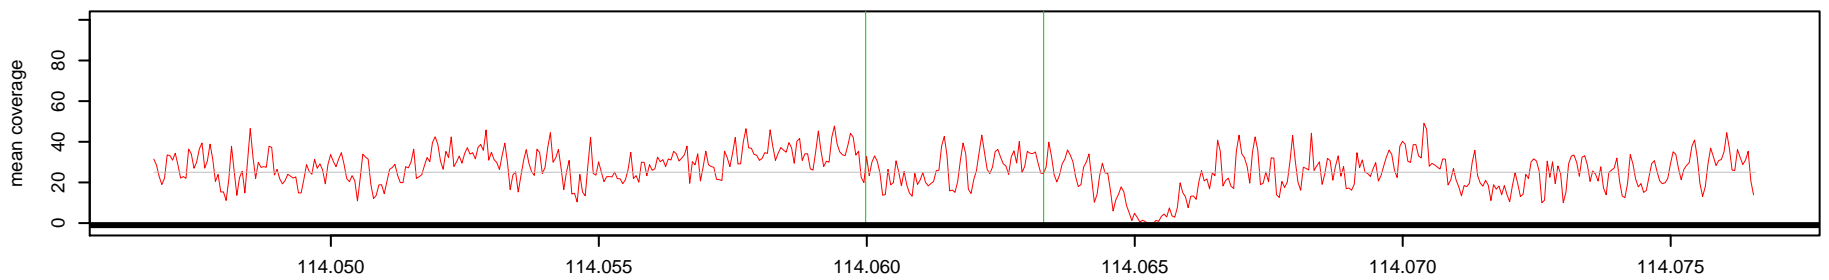

Log2( AK1 read depth / NA10851 read depth)

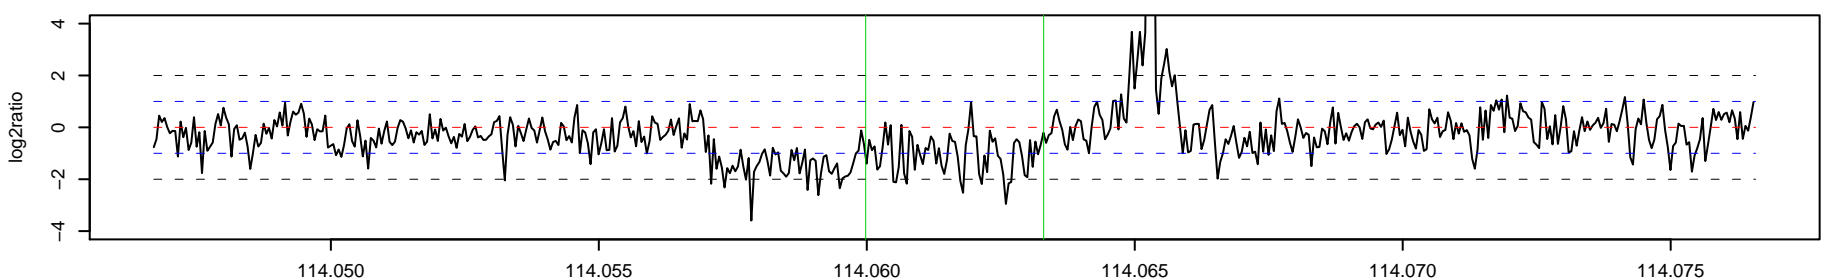

529\_AK1 Chr 14 : 18500439 – 18624583 , 124145 bp (aCGH relative log2ratio= -0.61 )

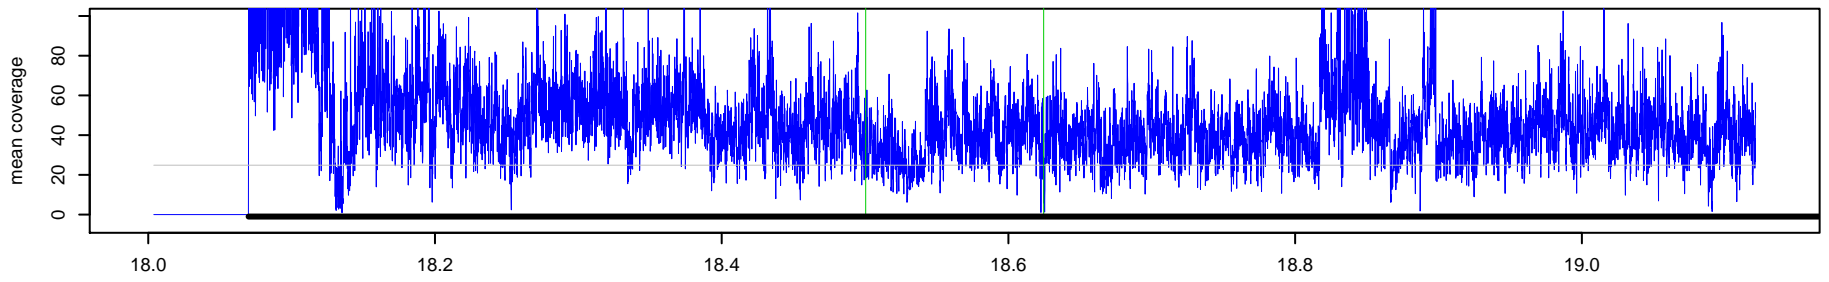

529\_NA10851 Chr 14 : 18500439 – 18624583 , 124145 bp (aCGH relative log2ratio= -0.61 )

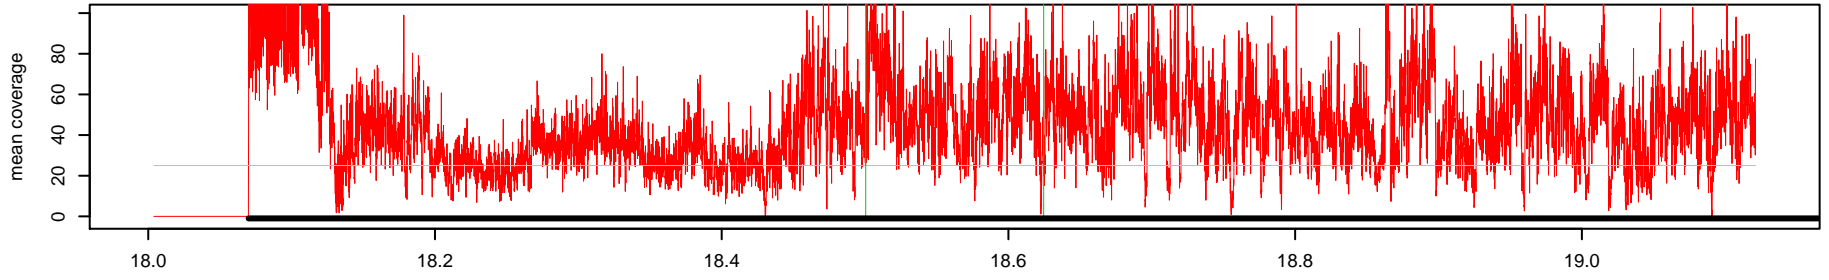

Log2( AK1 read depth / NA10851 read depth)

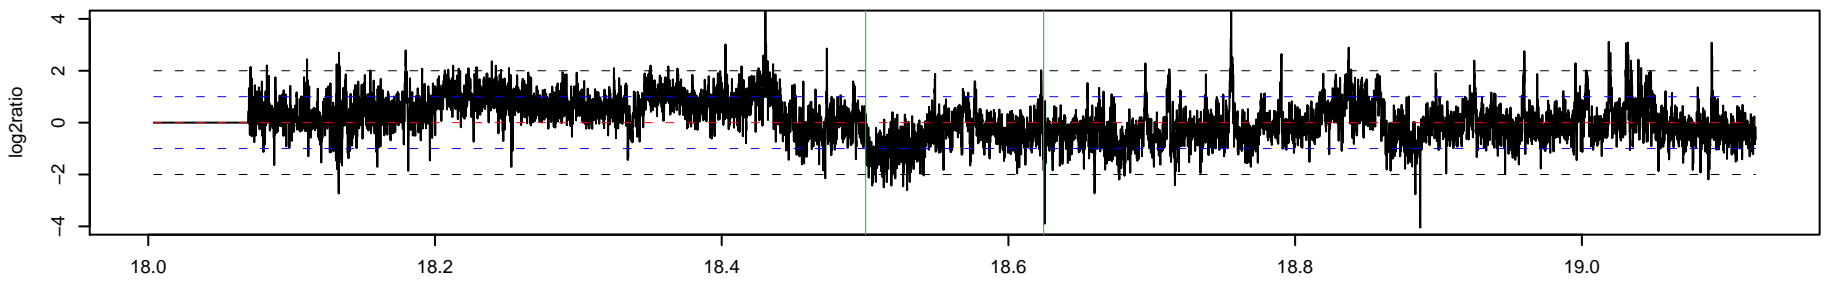

530\_AK1 Chr 14 : 19394583 – 19494430 , 99848 bp (aCGH relative log2ratio= -0.47 )

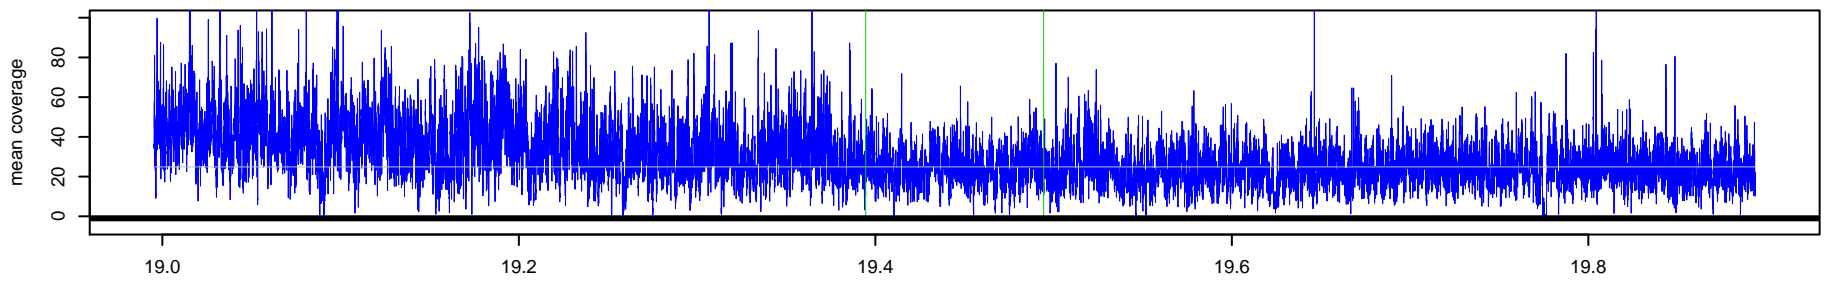

530\_NA10851 Chr 14 : 19394583 – 19494430 , 99848 bp (aCGH relative log2ratio= -0.47 )

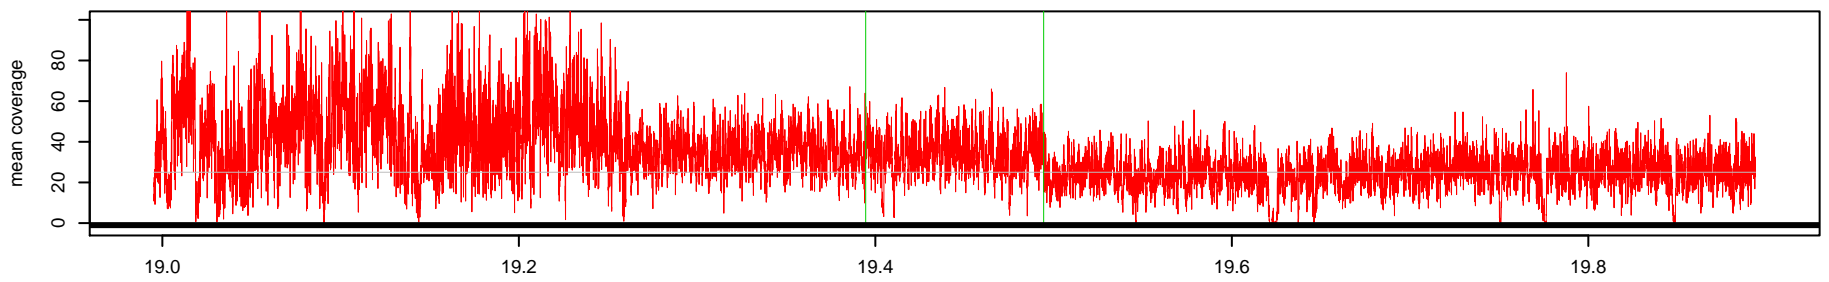

Log2( AK1 read depth / NA10851 read depth)

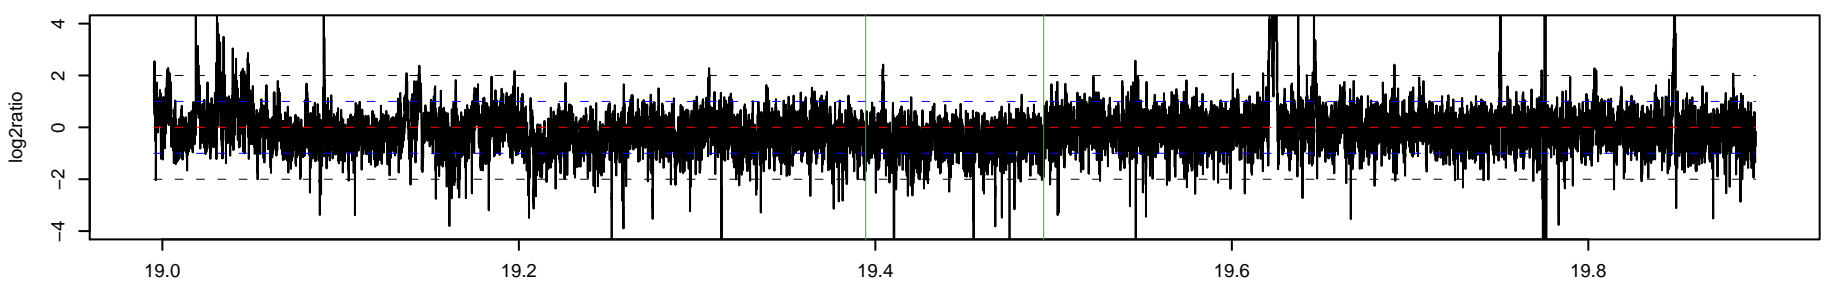

531\_AK1 Chr 14 : 19623793 – 19625073 , 1281 bp (aCGH relative log2ratio= 3.43 )

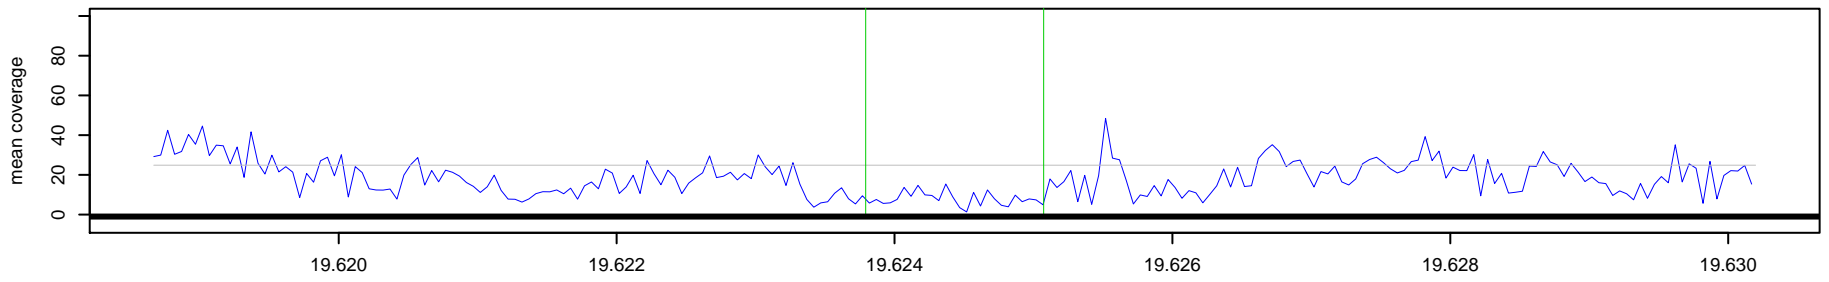

531\_NA10851 Chr 14 : 19623793 – 19625073 , 1281 bp (aCGH relative log2ratio= 3.43 )

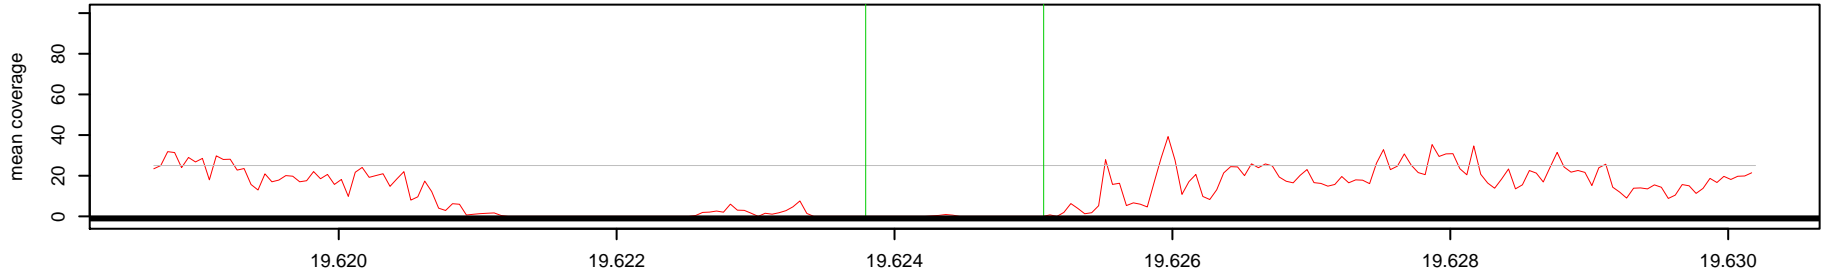

Log2( AK1 read depth / NA10851 read depth)

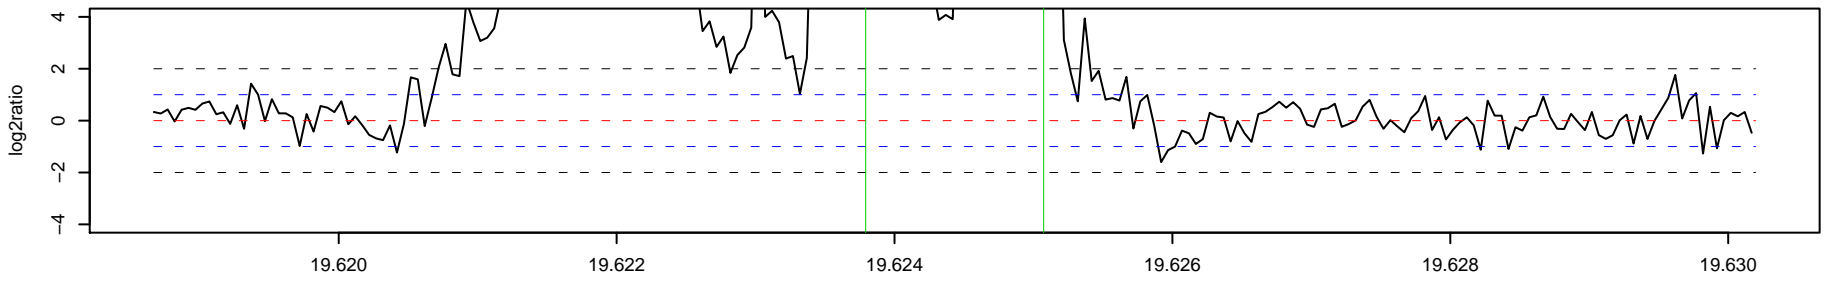

532\_AK1 Chr 14 : 21622075 – 22058505 , 436431 bp (aCGH relative log2ratio= -0.36 )

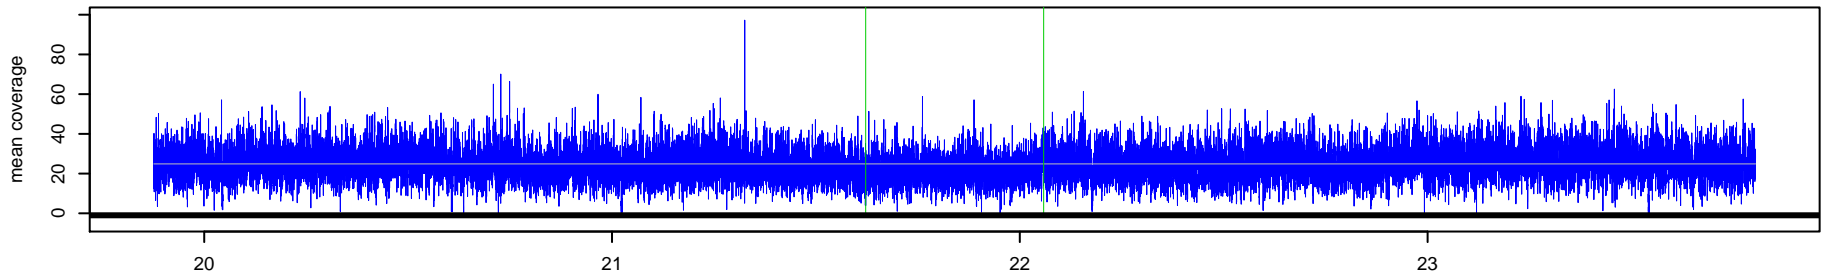

532\_NA10851 Chr 14 : 21622075 – 22058505 , 436431 bp (aCGH relative log2ratio= -0.36 )

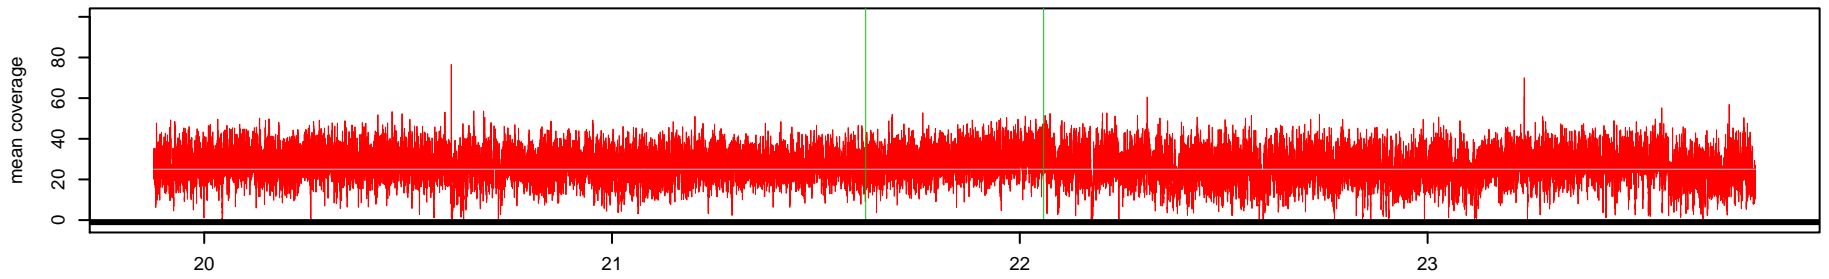

Log2( AK1 read depth / NA10851 read depth)

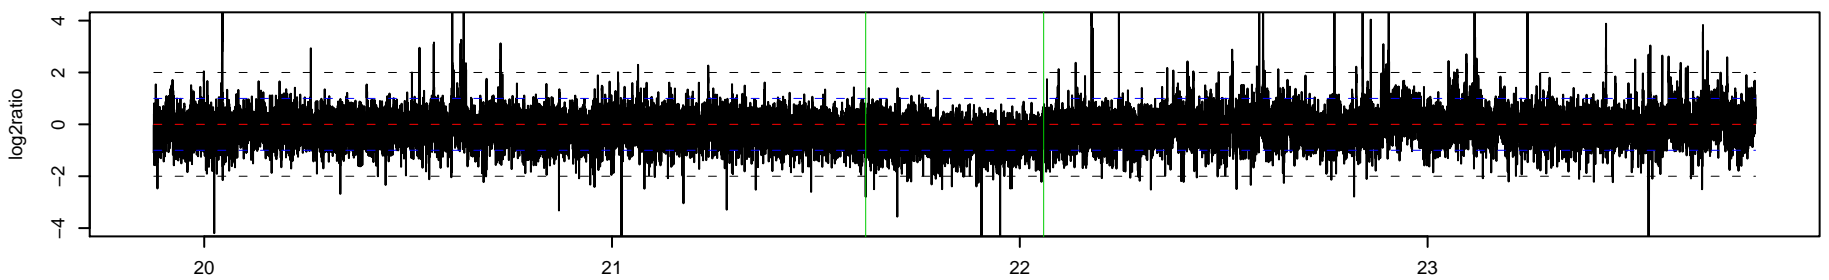

533\_AK1 Chr 14 : 21951605 - 21952148 , 544 bp (aCGH relative log2ratio= -3.63 )

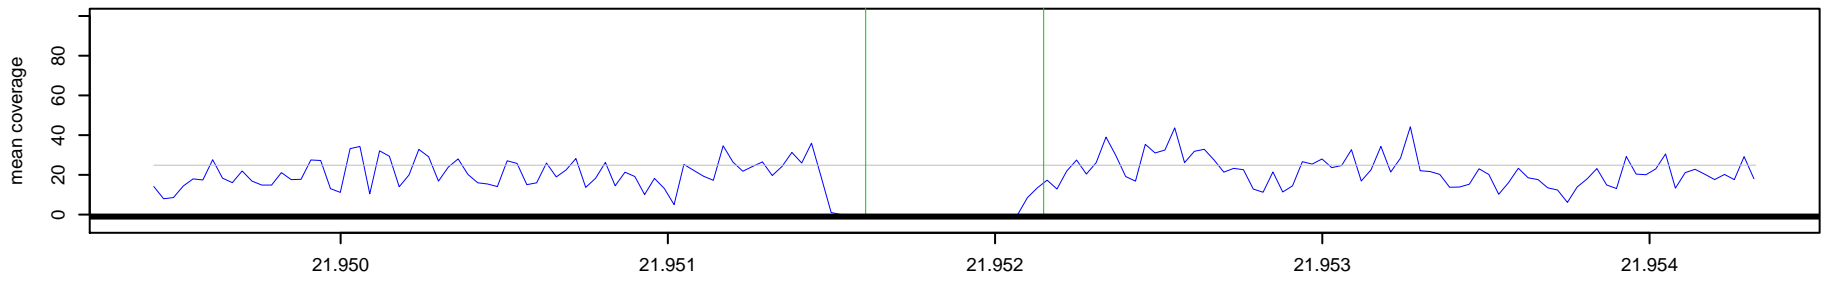

533\_NA10851 Chr 14 : 21951605 - 21952148 , 544 bp (aCGH relative log2ratio= -3.63 )

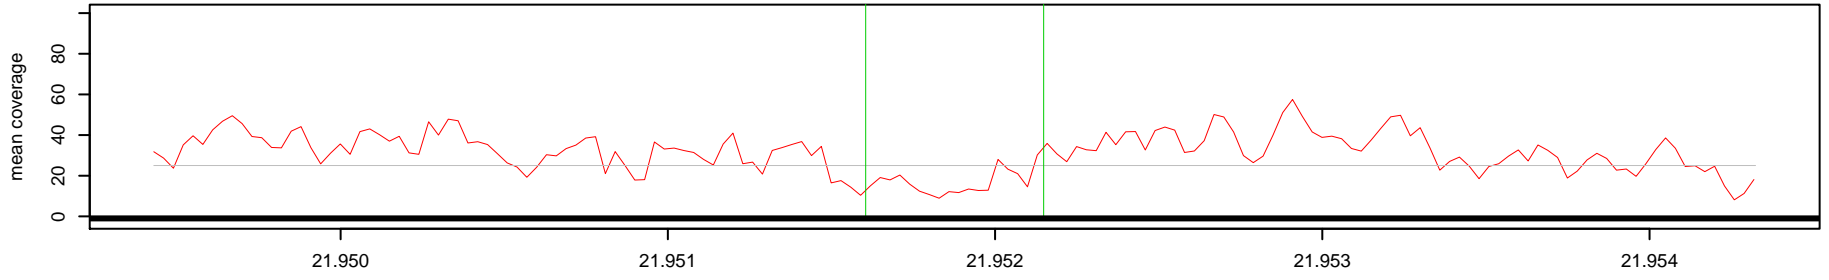

Log2( AK1 read depth / NA10851 read depth)

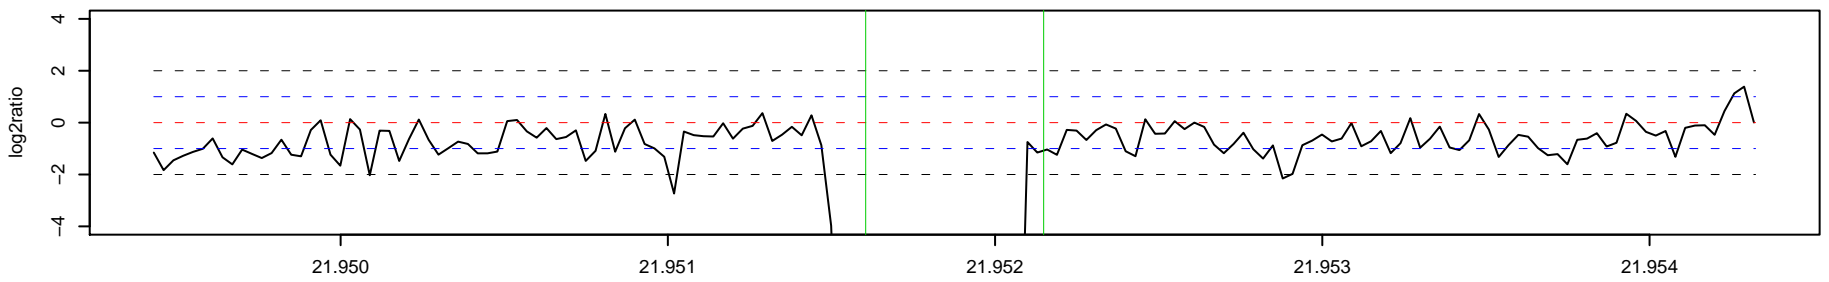

534\_AK1 Chr 14 : 24332119 - 24333038 , 920 bp (aCGH relative log2ratio= -0.90 )

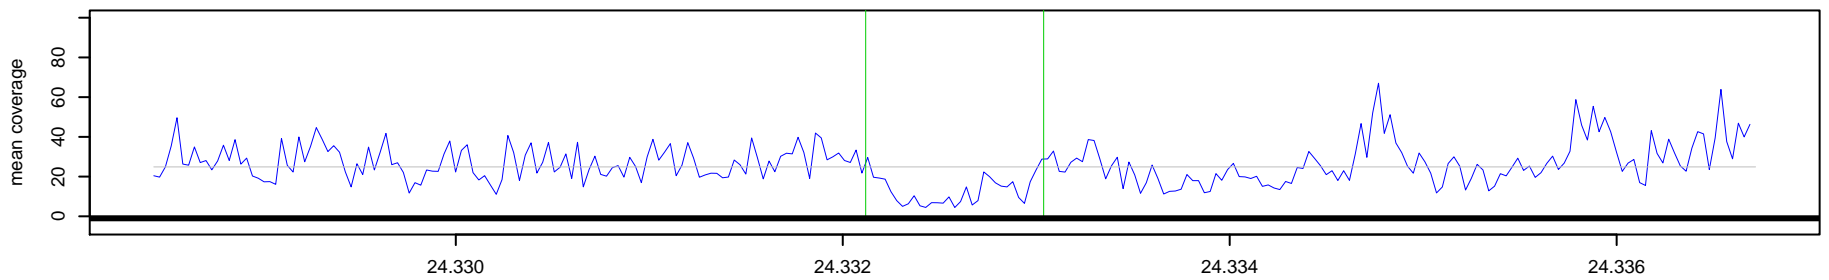

534\_NA10851 Chr 14 : 24332119 - 24333038 , 920 bp (aCGH relative log2ratio= -0.90 )

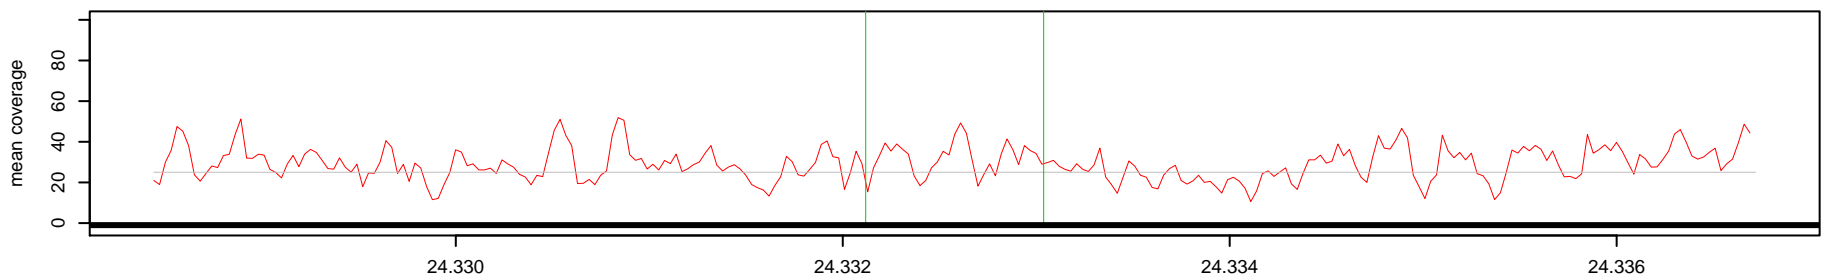

Log2( AK1 read depth / NA10851 read depth)

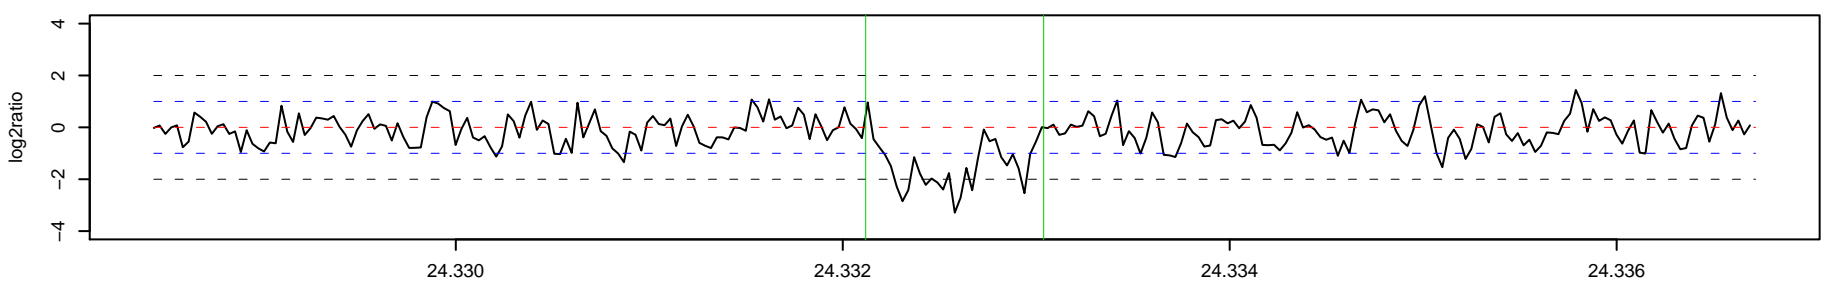

535\_AK1 Chr 14 : 34675560 - 34684010 , 8451 bp (aCGH relative log2ratio= -0.90 )

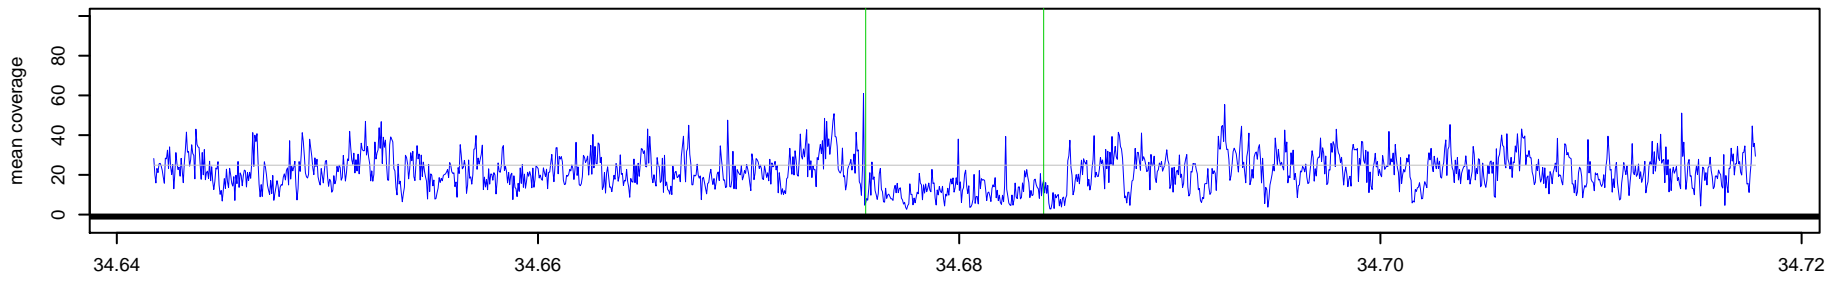

535\_NA10851 Chr 14 : 34675560 - 34684010 , 8451 bp (aCGH relative log2ratio= -0.90 )

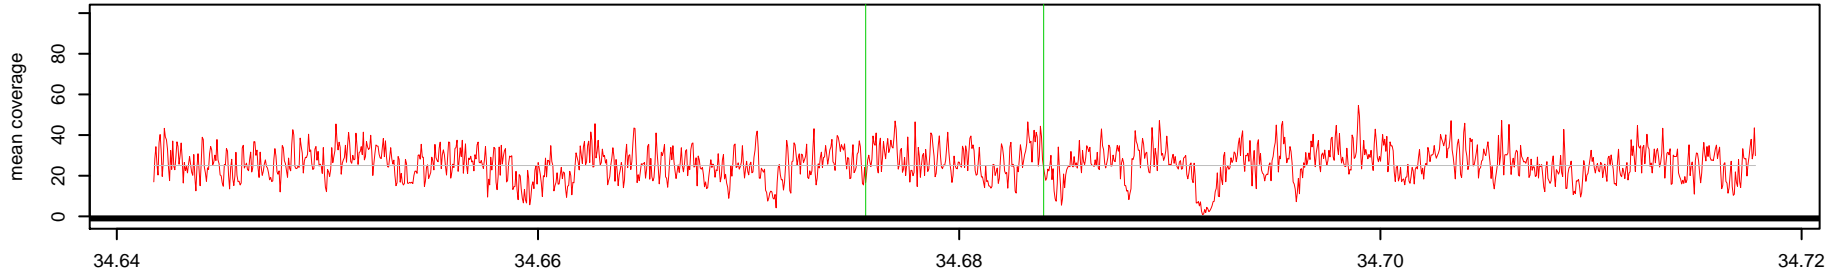

Log2( AK1 read depth / NA10851 read depth)

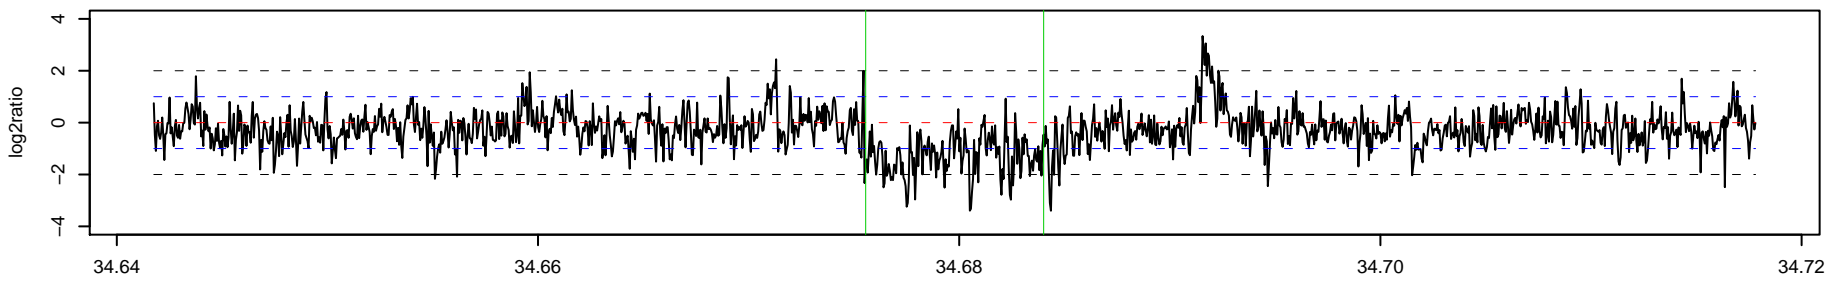

536\_AK1 Chr 14 : 38074258 - 38074766 , 509 bp (aCGH relative log2ratio= 0.69 )

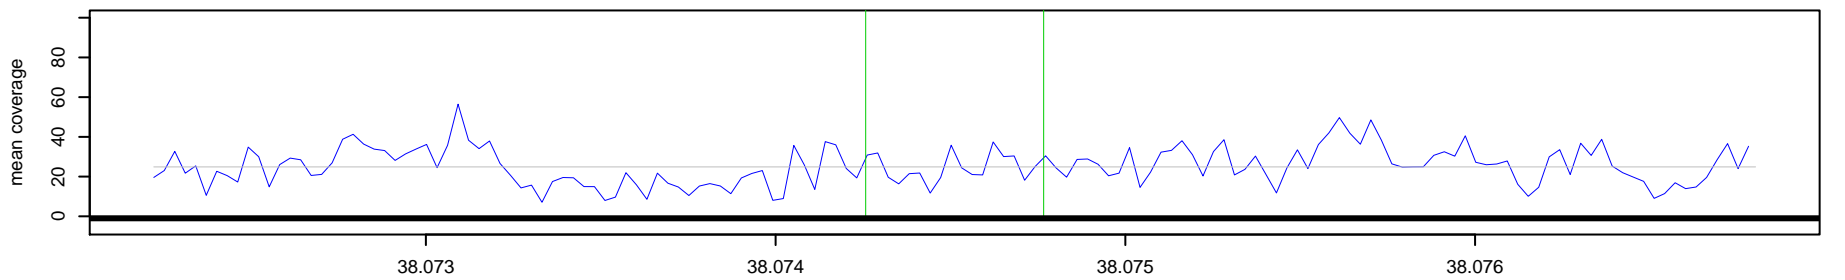

536\_NA10851 Chr 14 : 38074258 - 38074766 , 509 bp (aCGH relative log2ratio= 0.69 )

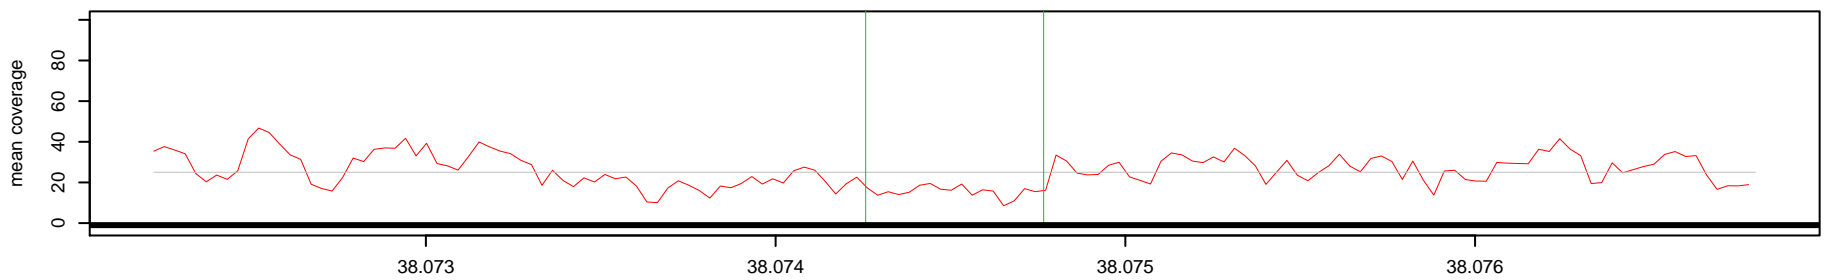

Log2( AK1 read depth / NA10851 read depth)

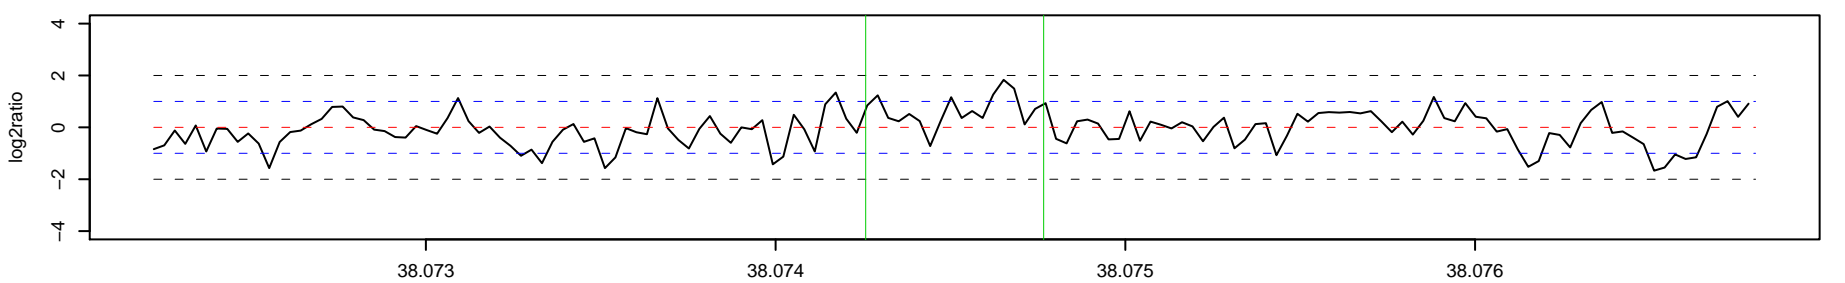



537 \_ AK1 Chr 14 : 38579867 – 38580627 , 761 bp (aCGH relative log2ratio= 0.58 )

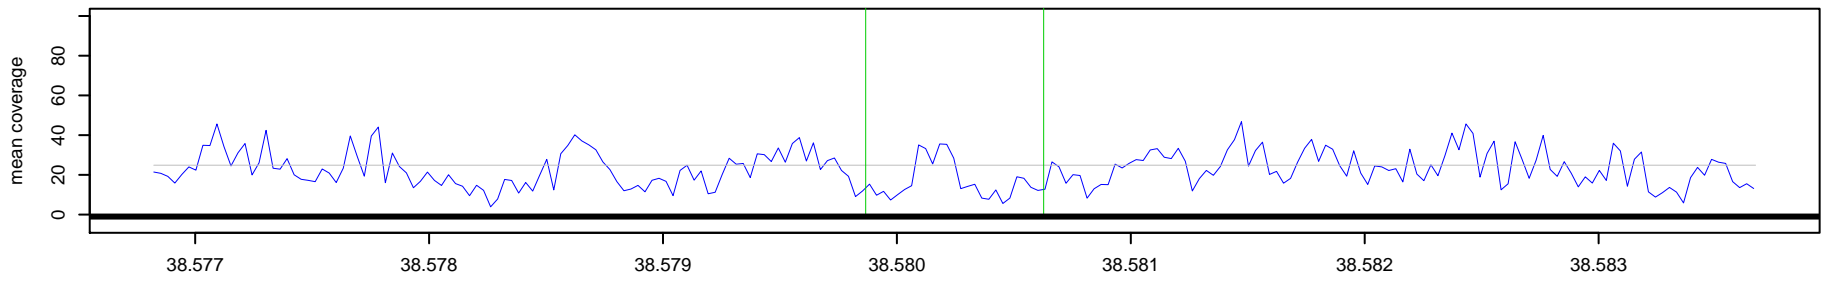

537 \_ NA10851 Chr 14 : 38579867 – 38580627 , 761 bp (aCGH relative log2ratio= 0.58 )

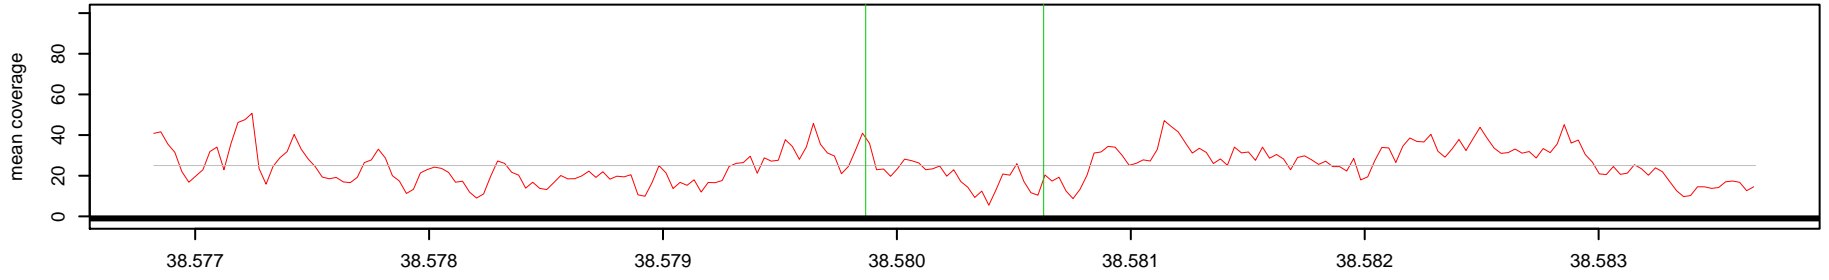

Log2( AK1 read depth / NA10851 read depth)

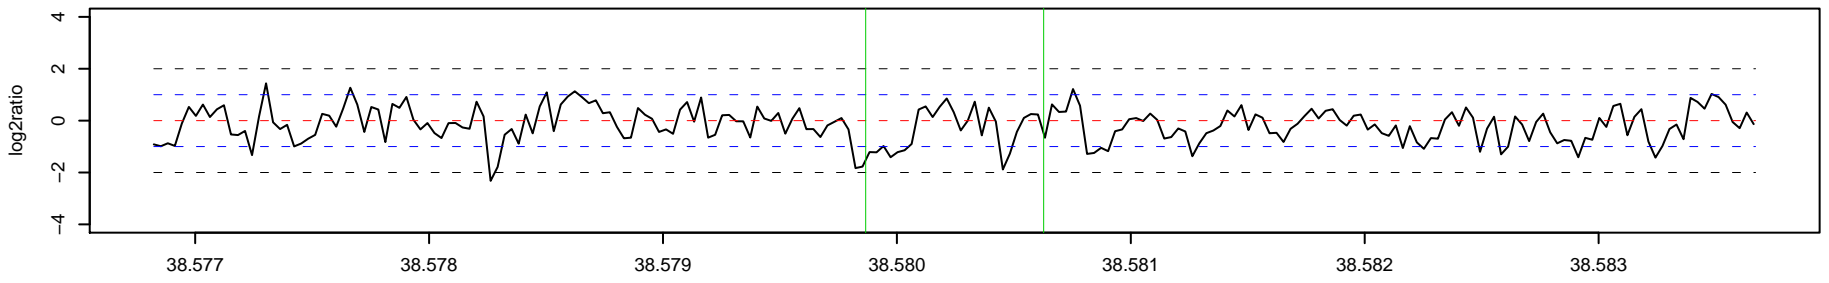

538 \_ AK1 Chr 14 : 39679631 – 39687447 , 7817 bp (aCGH relative log2ratio= -2.13 )

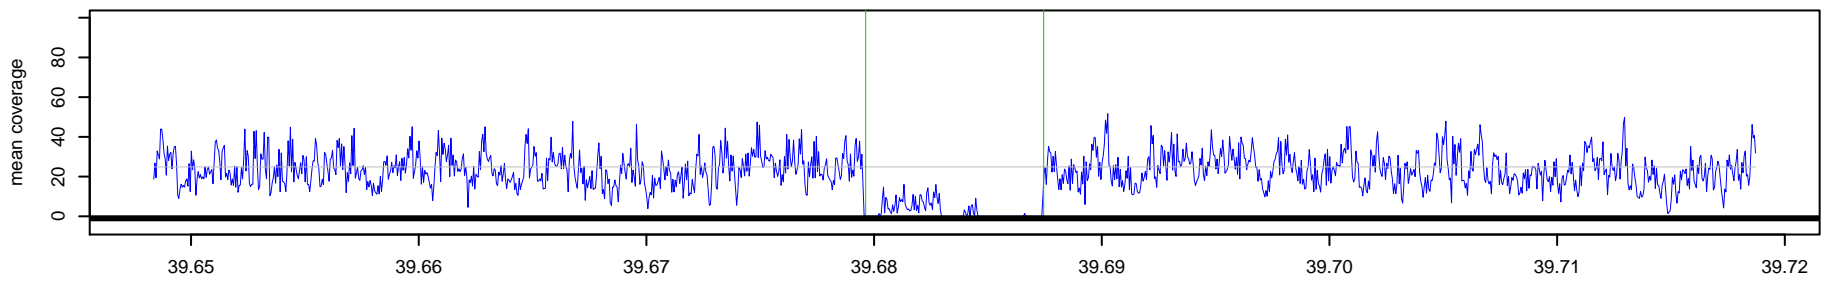

538 \_ NA10851 Chr 14 : 39679631 – 39687447 , 7817 bp (aCGH relative log2ratio= -2.13 )

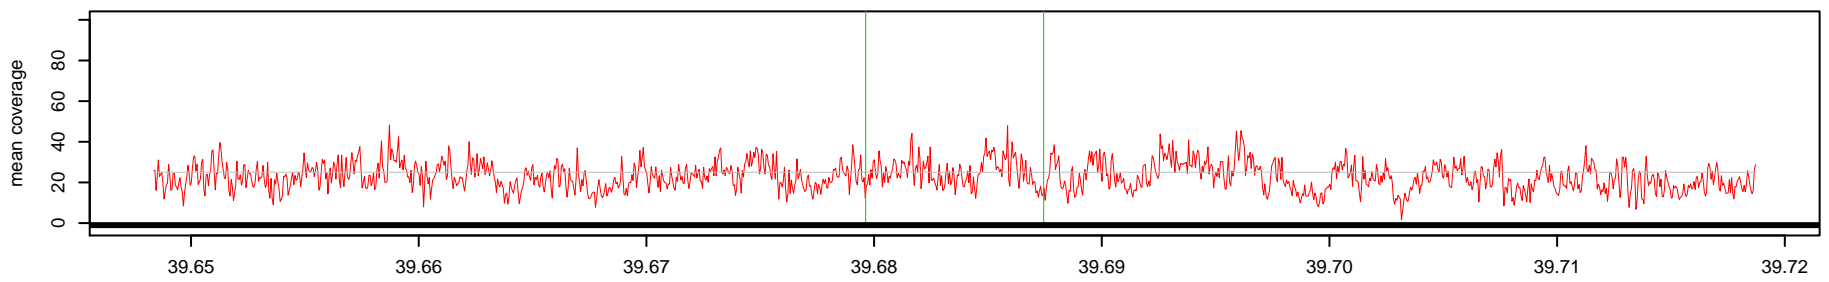

Log2( AK1 read depth / NA10851 read depth)

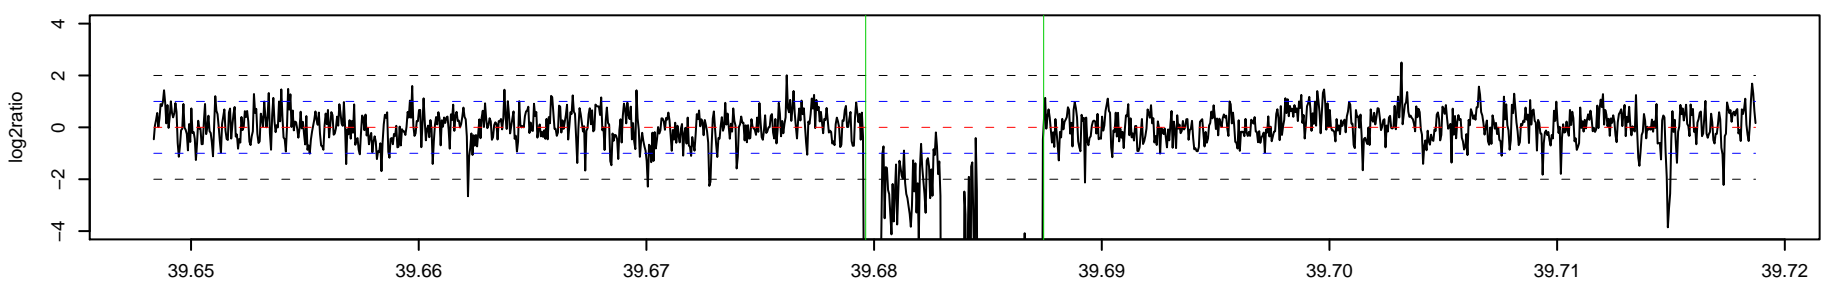

539\_AK1 Chr 14 : 40679711 – 40739461 , 59751 bp (aCGH relative log2ratio= -0.77 )

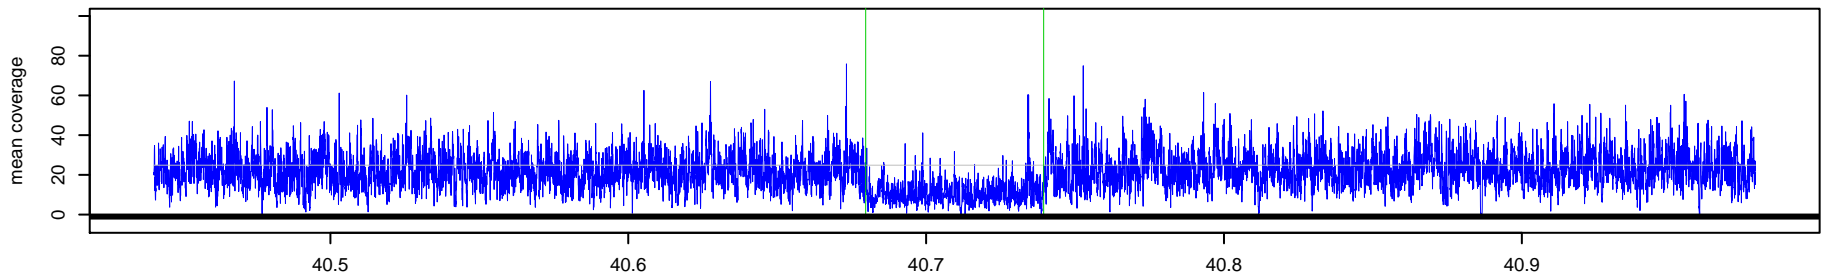

539\_NA10851 Chr 14 : 40679711 – 40739461 , 59751 bp (aCGH relative log2ratio= -0.77 )

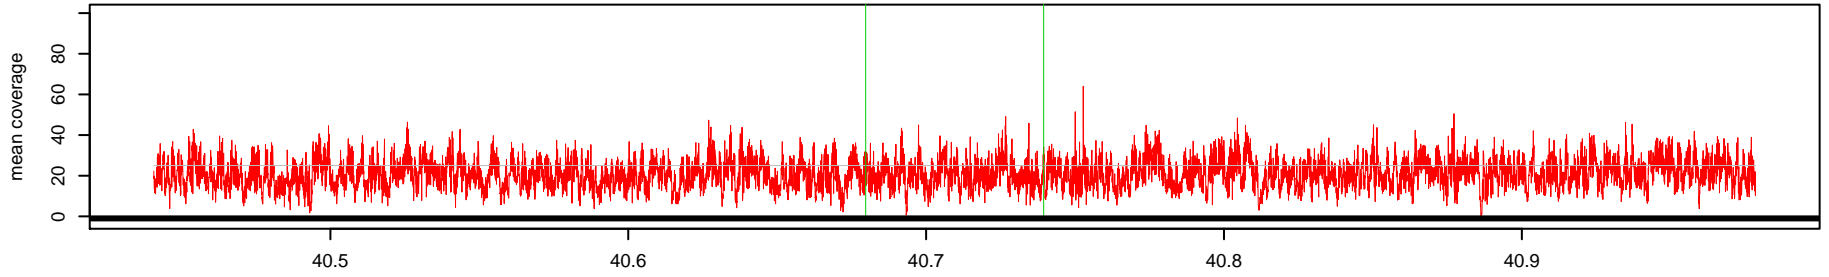

Log2( AK1 read depth / NA10851 read depth)

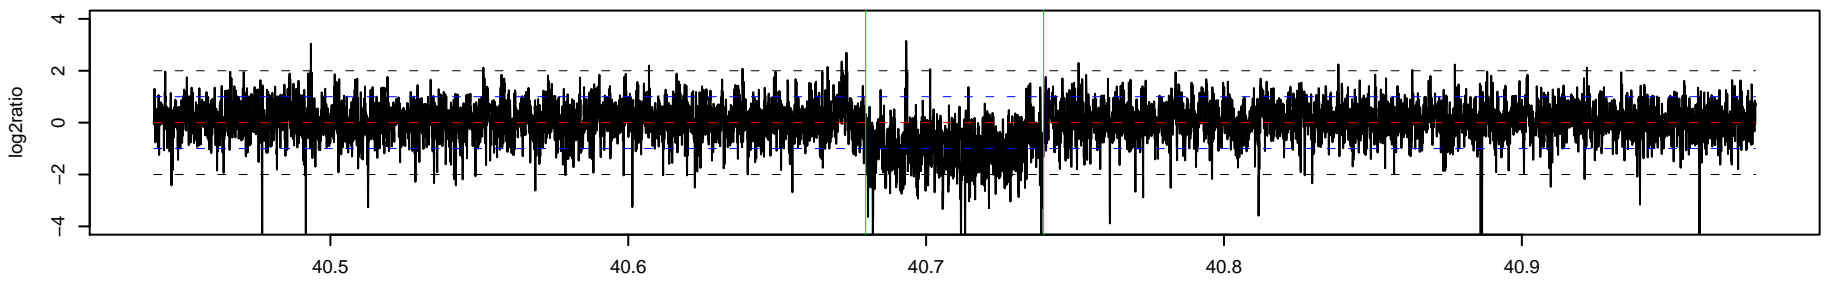

540\_AK1 Chr 14 : 42061604 – 42062671 , 1068 bp (aCGH relative log2ratio= 0.88 )

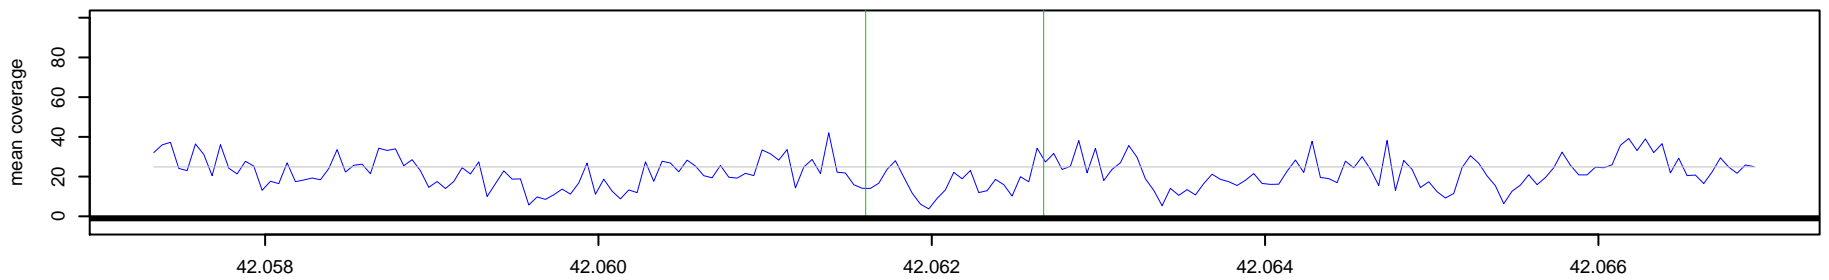

540\_NA10851 Chr 14 : 42061604 – 42062671 , 1068 bp (aCGH relative log2ratio= 0.88 )

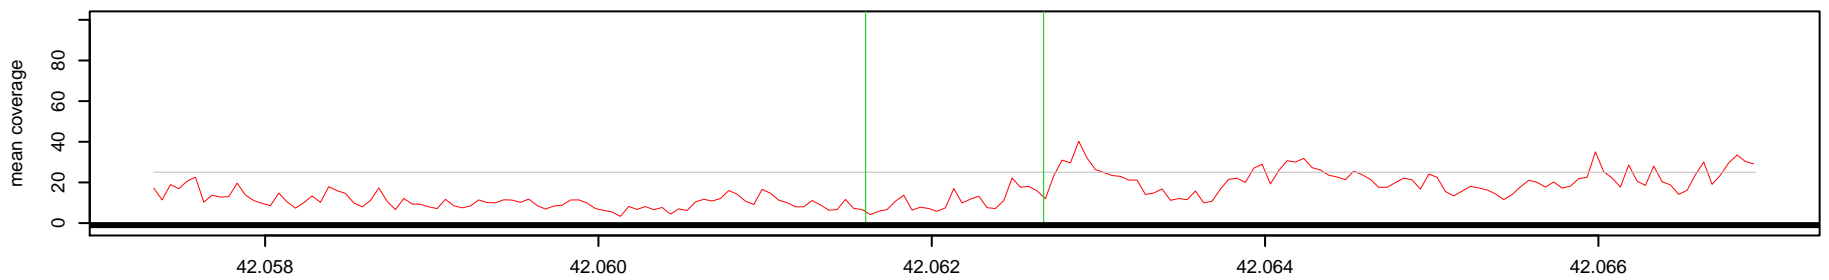

Log2( AK1 read depth / NA10851 read depth)

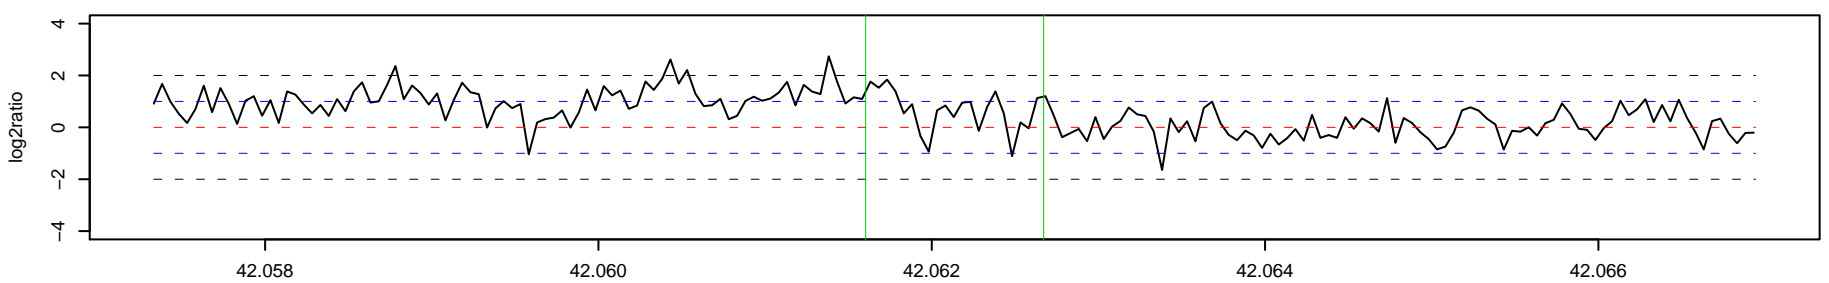

541 \_ AK1 Chr 14 : 47826898 – 47827687 , 790 bp (aCGH relative log2ratio= 0.74 )

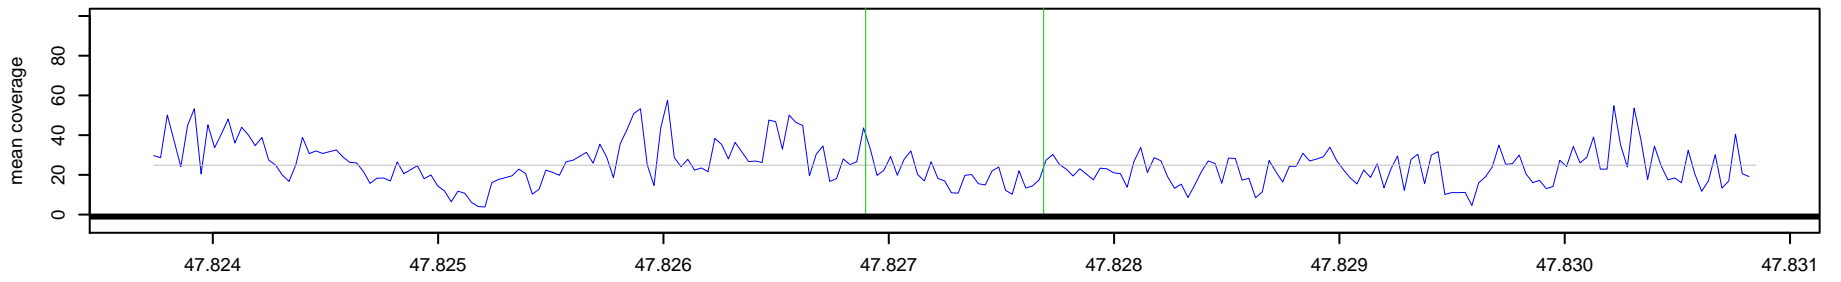

541 \_ NA10851 Chr 14 : 47826898 – 47827687 , 790 bp (aCGH relative log2ratio= 0.74 )

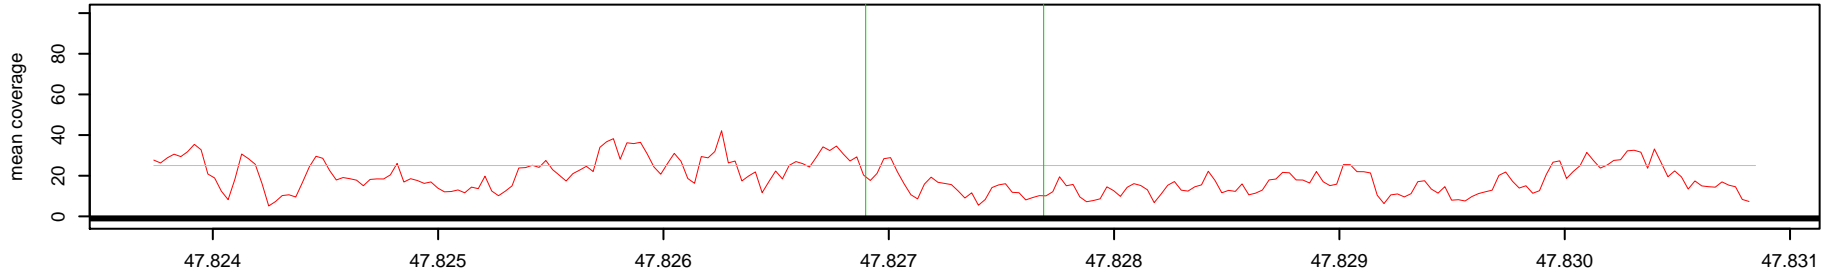

Log2( AK1 read depth / NA10851 read depth)

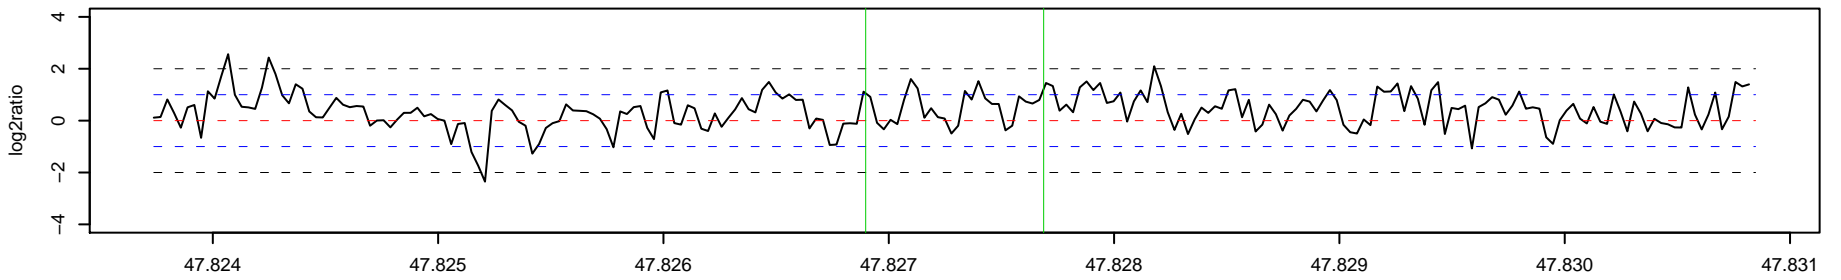

542 \_ AK1 Chr 14 : 49894824 – 49896779 , 1956 bp (aCGH relative log2ratio= 0.61 )

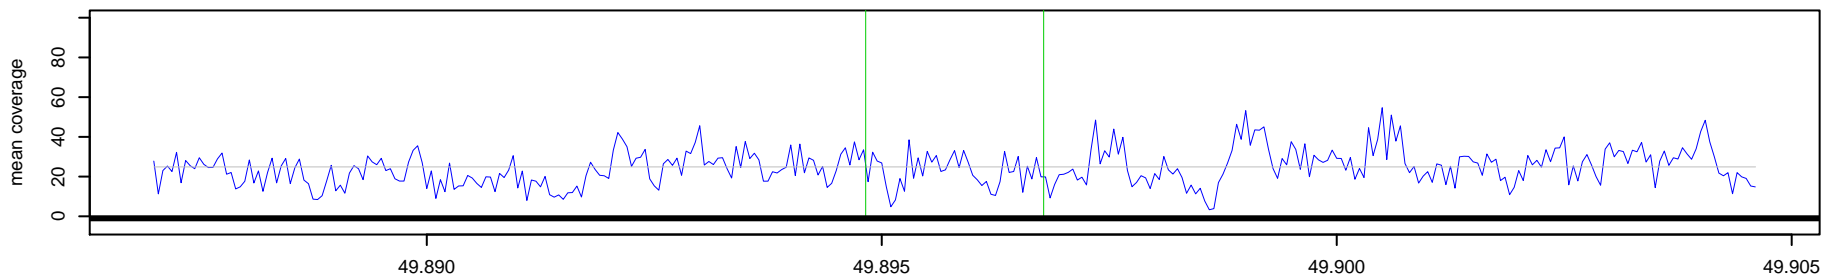

542 \_ NA10851 Chr 14 : 49894824 – 49896779 , 1956 bp (aCGH relative log2ratio= 0.61 )

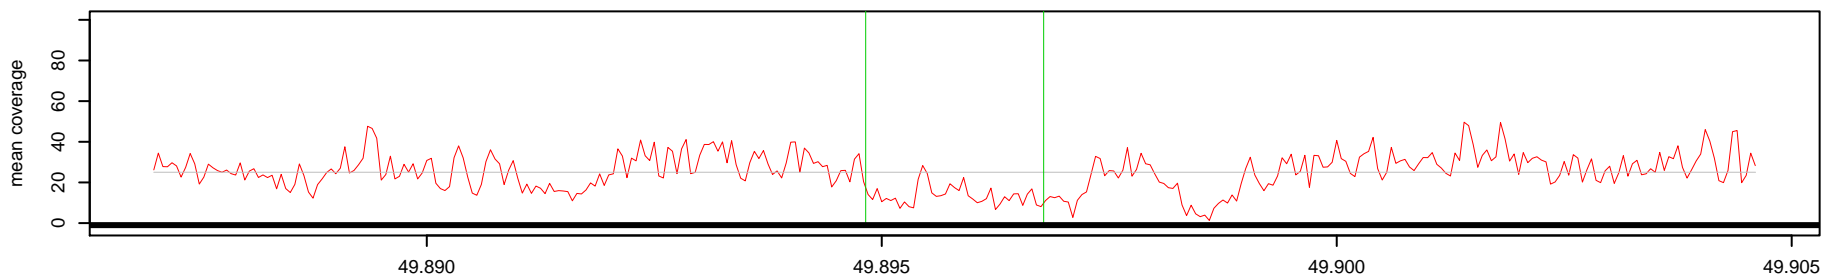

Log2( AK1 read depth / NA10851 read depth)

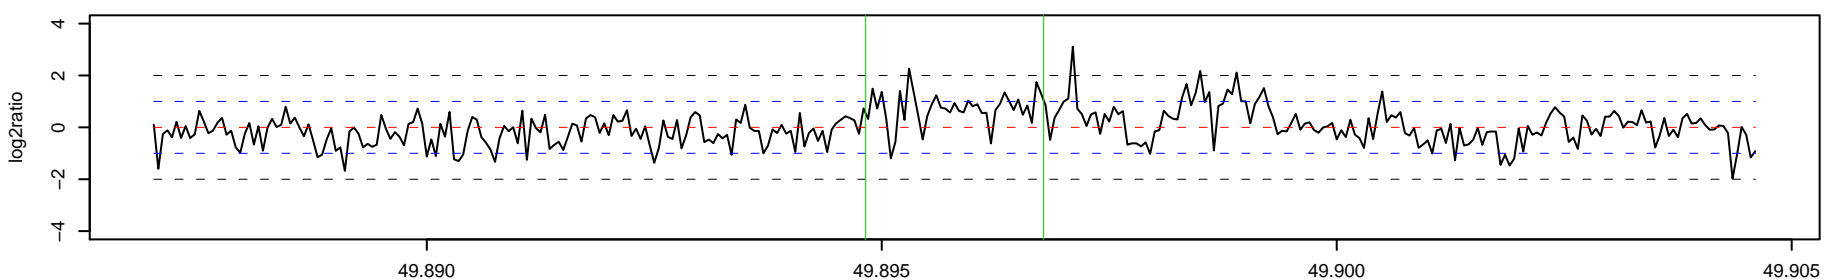

543\_AK1 Chr 14 : 52322327 - 52324712 , 2386 bp (aCGH relative log2ratio= -0.91 )

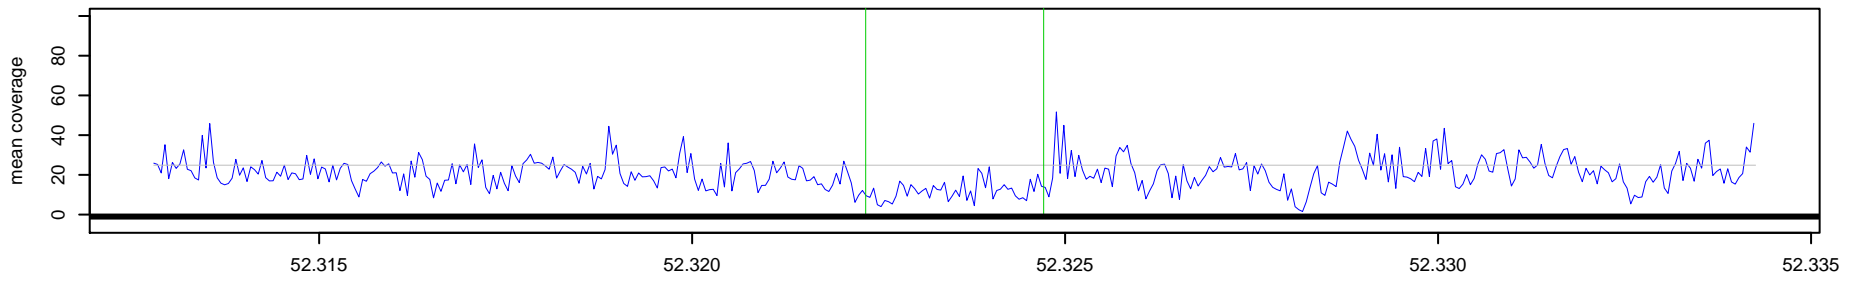

543\_NA10851 Chr 14 : 52322327 - 52324712 , 2386 bp (aCGH relative log2ratio= -0.91 )

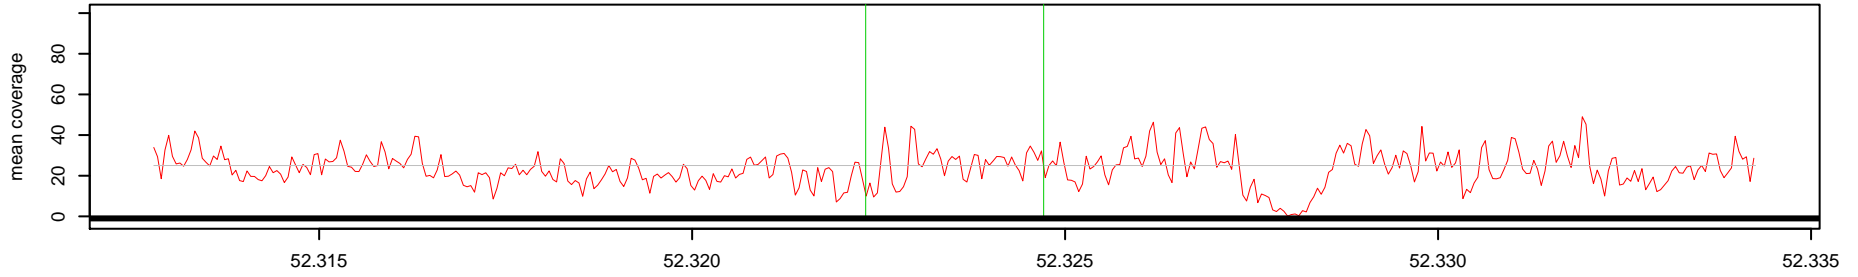

Log2( AK1 read depth / NA10851 read depth)

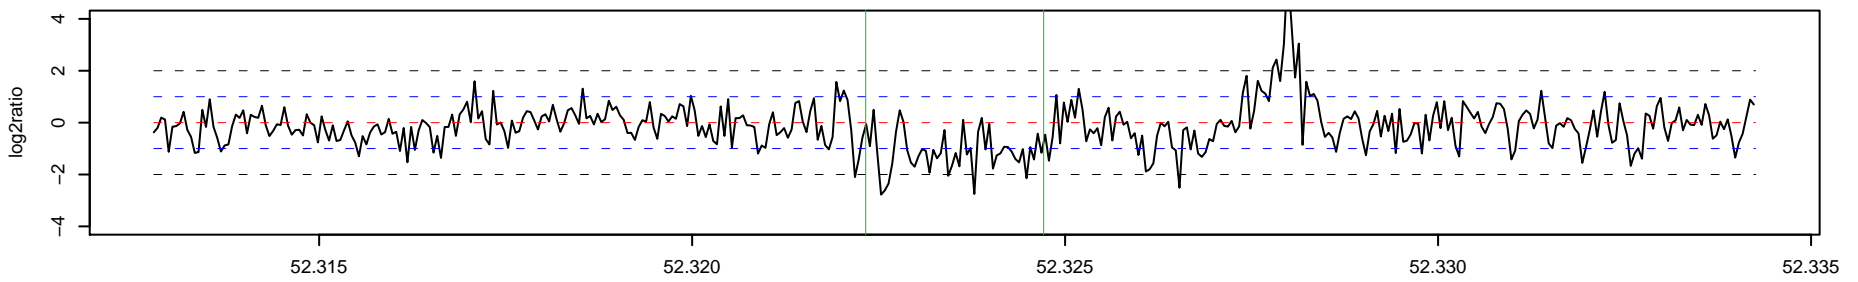

544\_AK1 Chr 14 : 53780435 - 53783400 , 2966 bp (aCGH relative log2ratio= -0.94 )

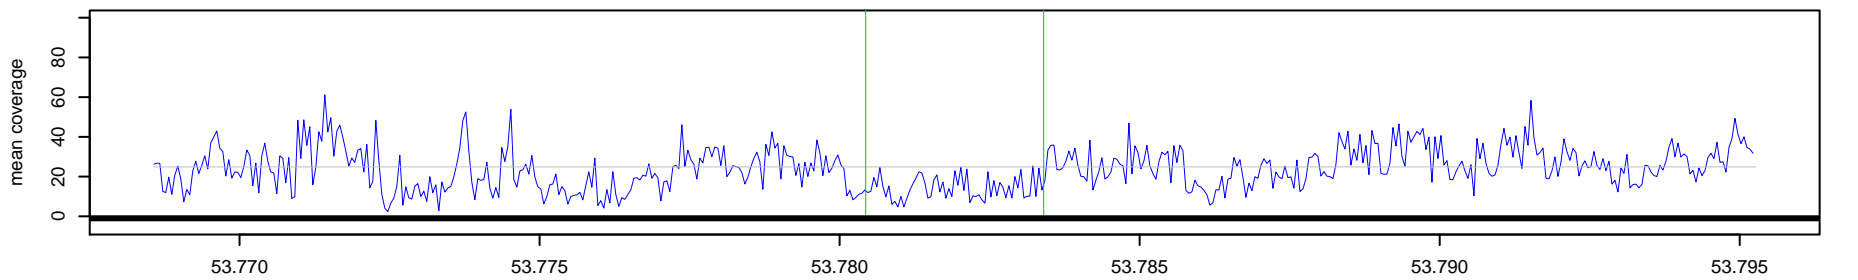

544\_NA10851 Chr 14 : 53780435 - 53783400 , 2966 bp (aCGH relative log2ratio= -0.94 )

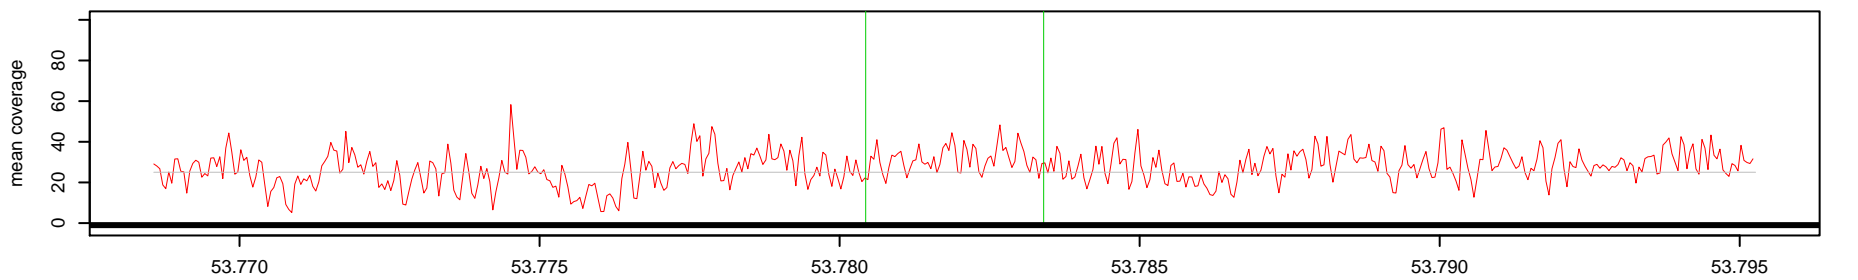

Log2( AK1 read depth / NA10851 read depth)

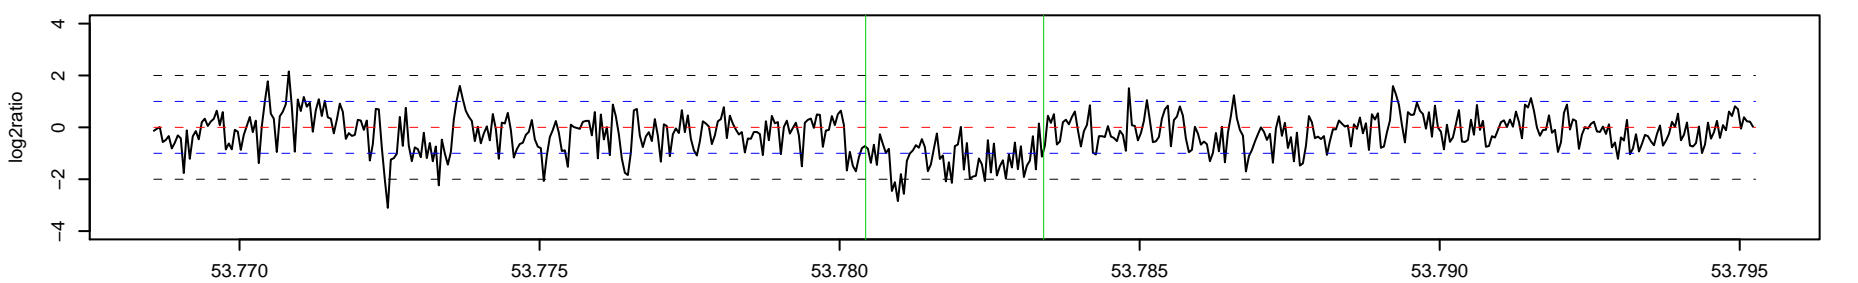

545\_AK1 Chr 14 : 54389615 – 54395774 , 6160 bp (aCGH relative log2ratio= -0.93 )

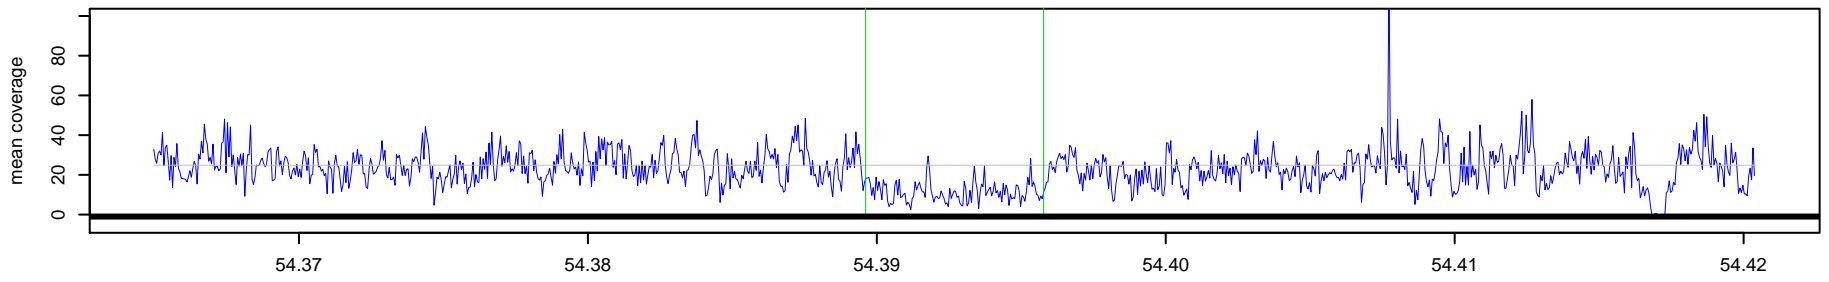

545\_NA10851 Chr 14 : 54389615 – 54395774 , 6160 bp (aCGH relative log2ratio= -0.93 )

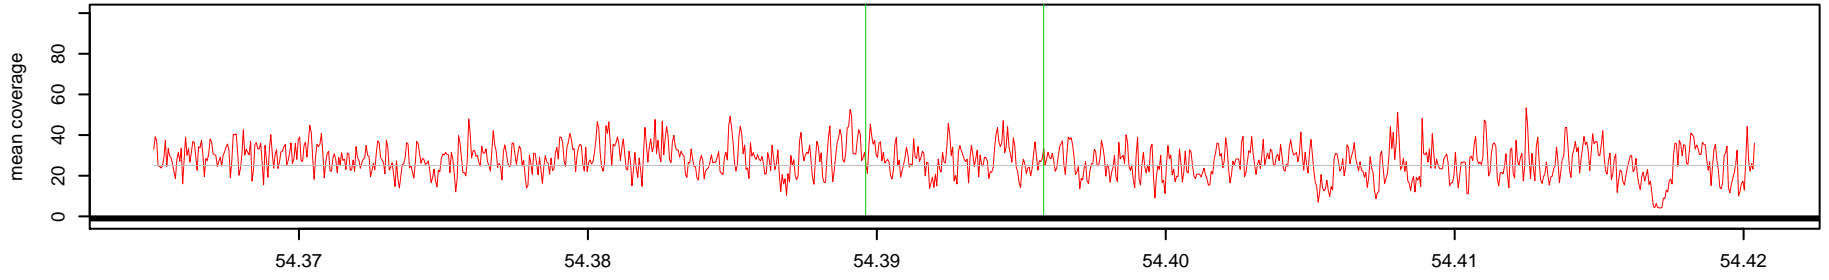

Log2( AK1 read depth / NA10851 read depth)

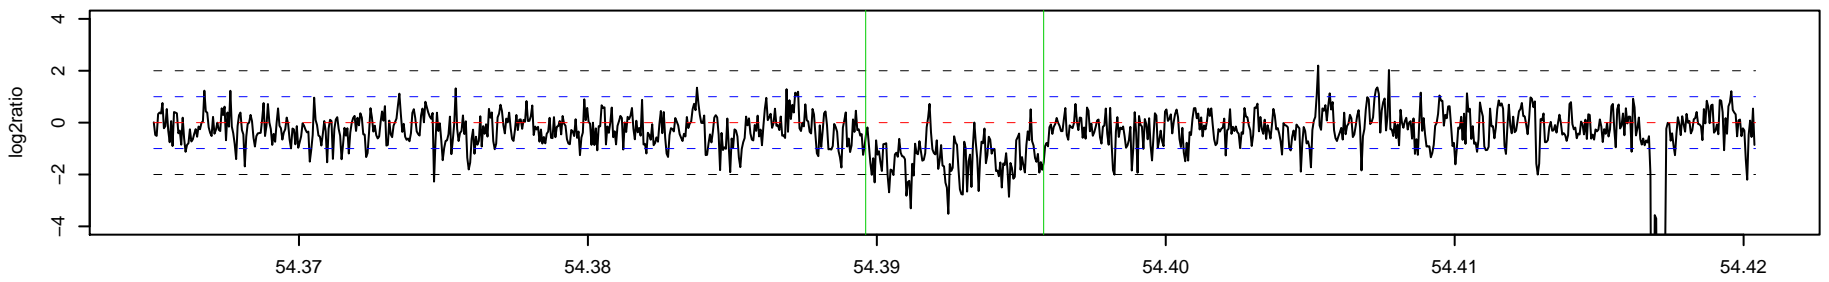

o

o

546\_AK1 Chr 14 : 62793666 – 62794550 , 885 bp (aCGH relative log2ratio= -0.68 )

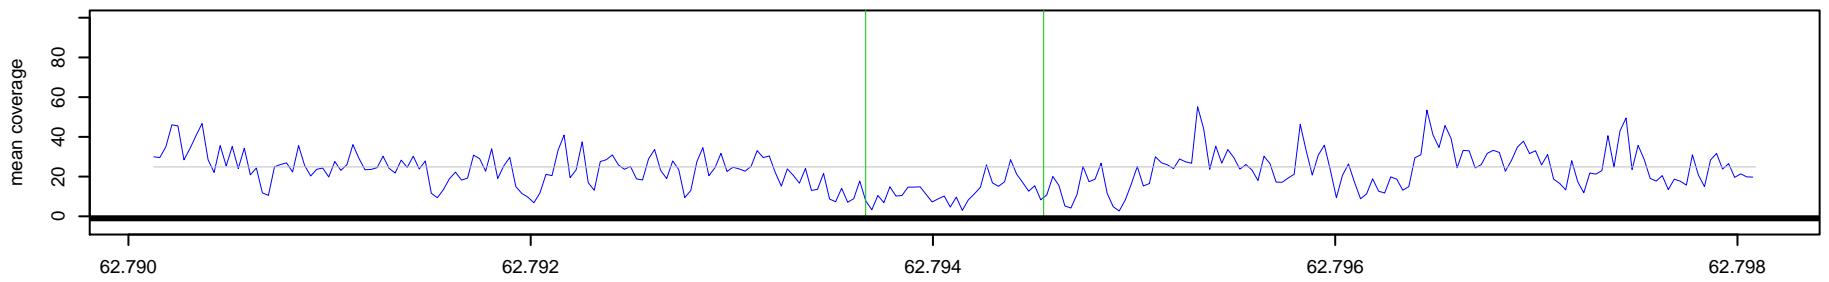

546\_NA10851 Chr 14 : 62793666 – 62794550 , 885 bp (aCGH relative log2ratio= -0.68 )

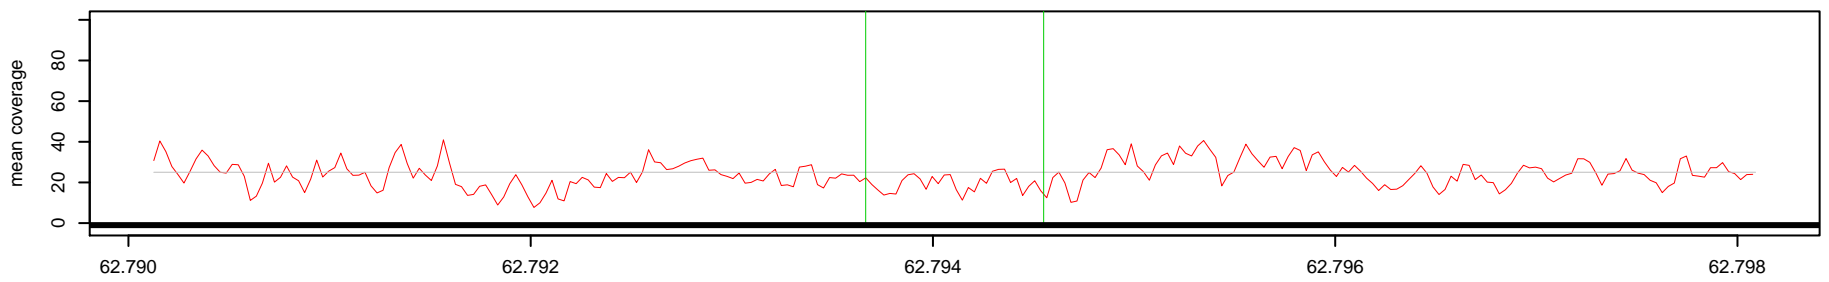

Log2( AK1 read depth / NA10851 read depth)

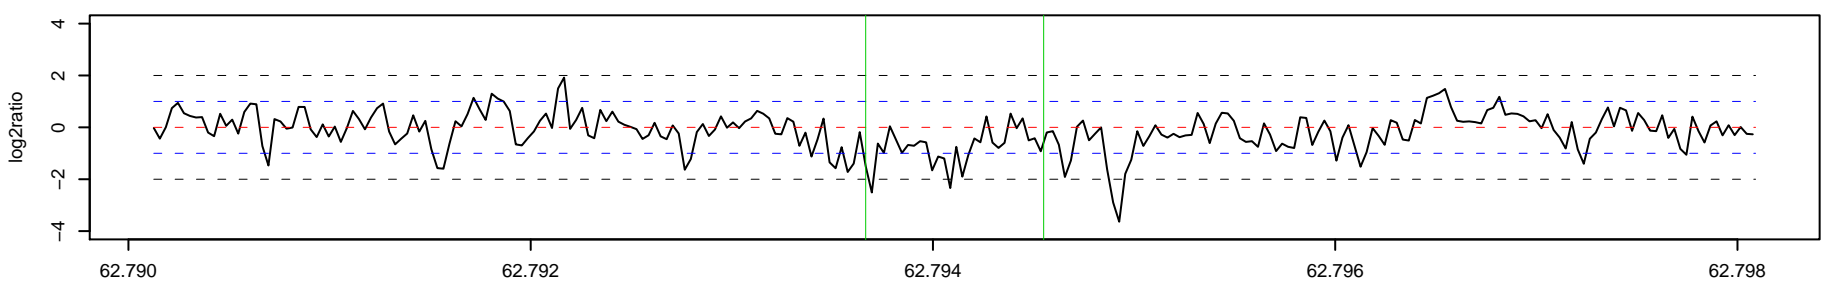

547\_AK1 Chr 14 : 71875796 – 71880675 , 4880 bp (aCGH relative log2ratio= -0.87 )

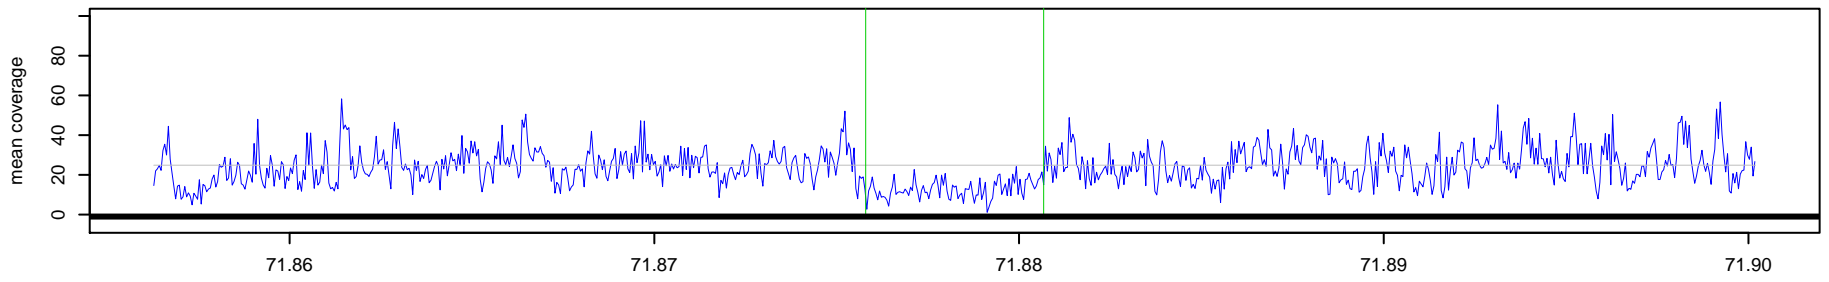

547\_NA10851 Chr 14 : 71875796 – 71880675 , 4880 bp (aCGH relative log2ratio= -0.87 )

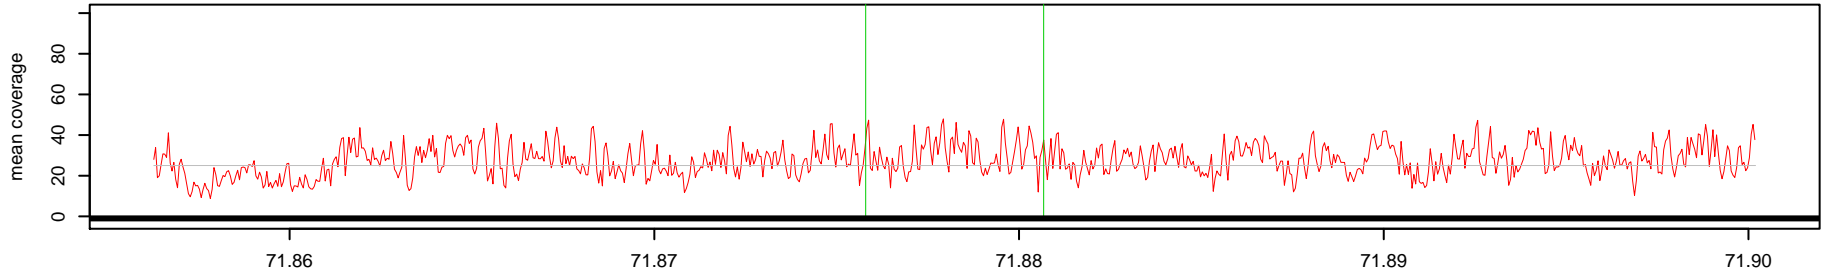

Log2( AK1 read depth / NA10851 read depth)

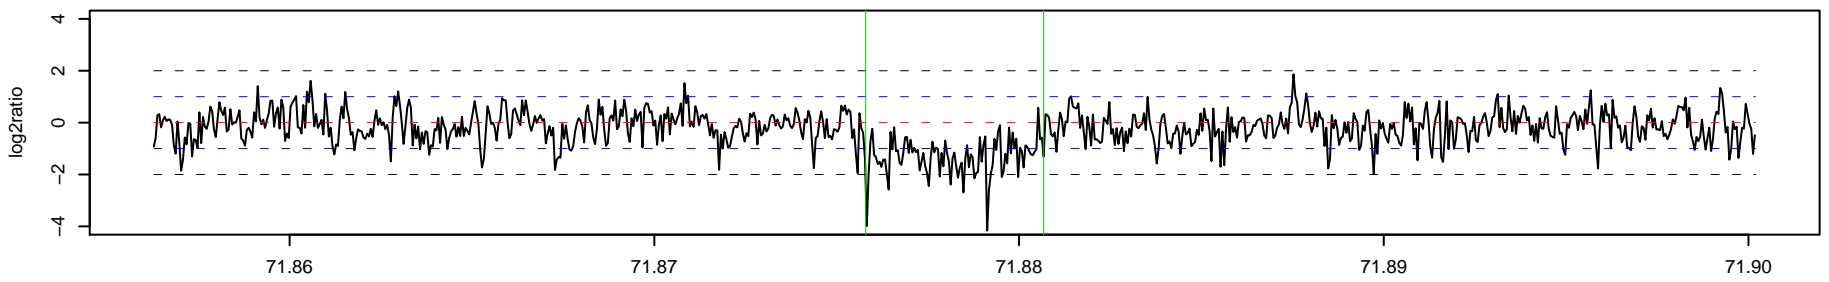

548\_AK1 Chr 14 : 73071204 – 73083170 , 11967 bp (aCGH relative log2ratio= -0.92 )

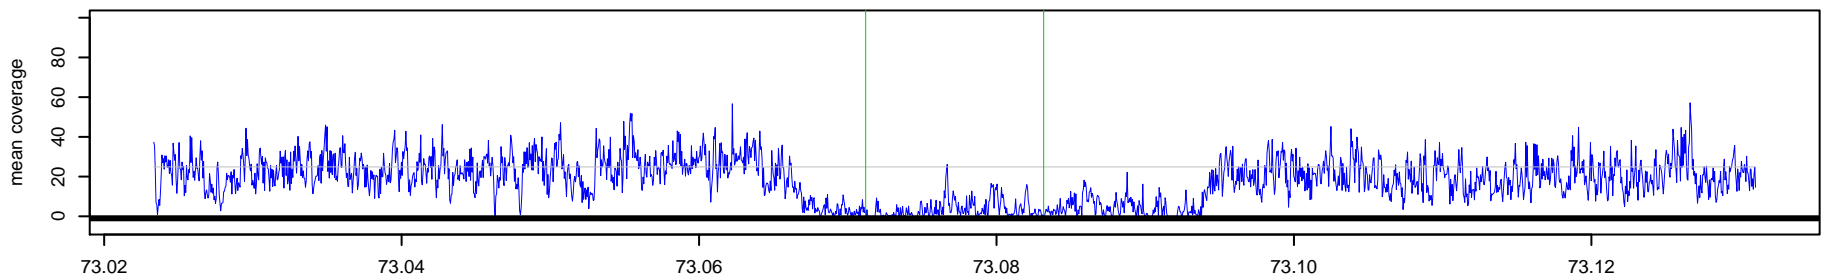

548\_NA10851 Chr 14 : 73071204 – 73083170 , 11967 bp (aCGH relative log2ratio= -0.92 )

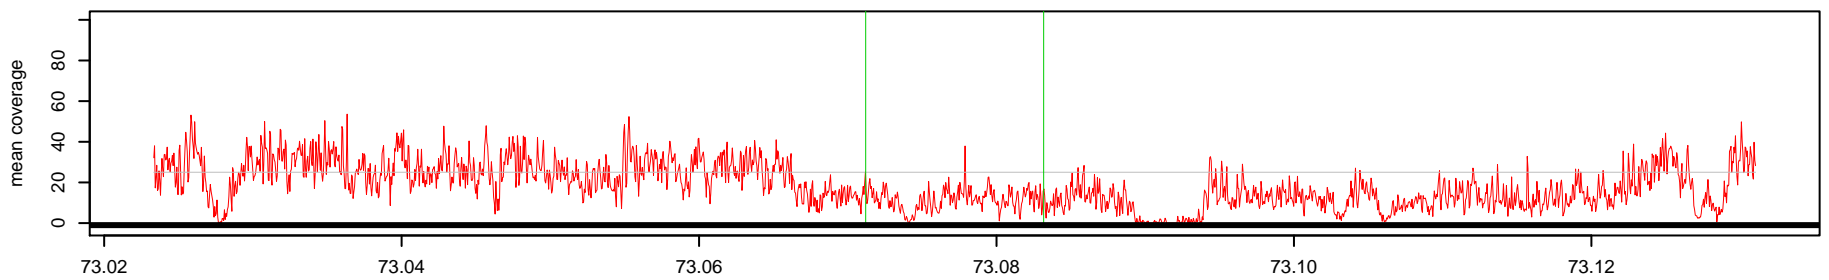

Log2( AK1 read depth / NA10851 read depth)

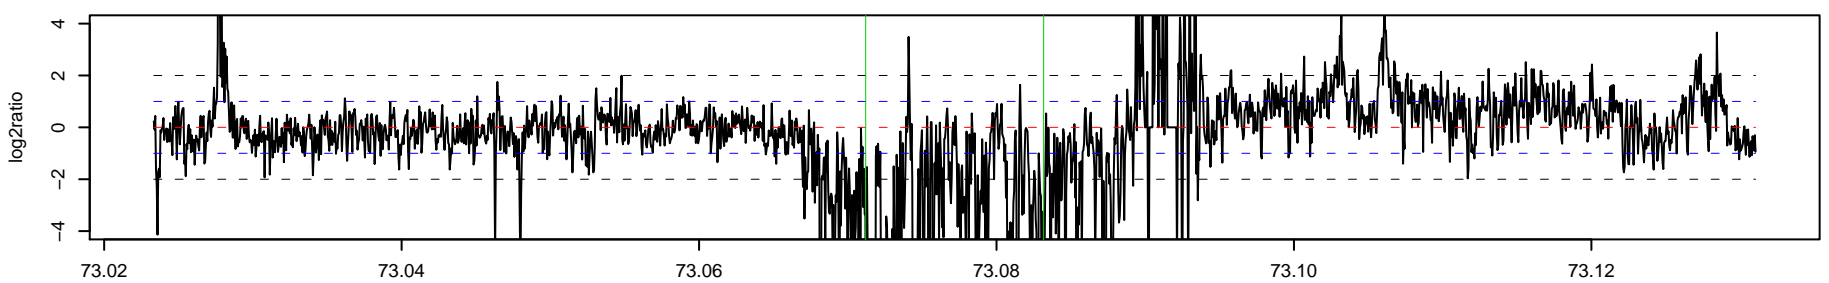

549\_AK1 Chr 14 : 73092065 – 73107399 , 15335 bp (aCGH relative log2ratio= 0.67 )

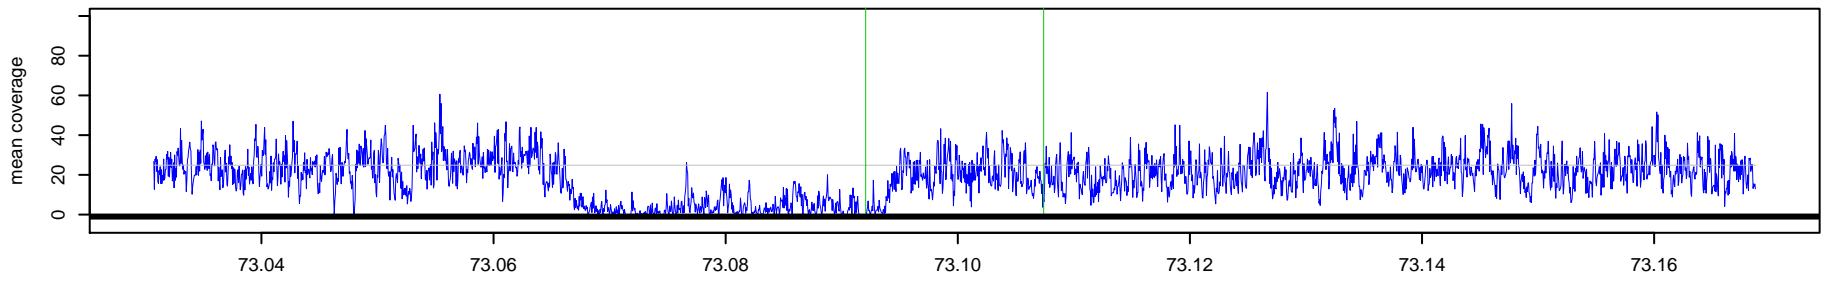

549\_NA10851 Chr 14 : 73092065 – 73107399 , 15335 bp (aCGH relative log2ratio= 0.67 )

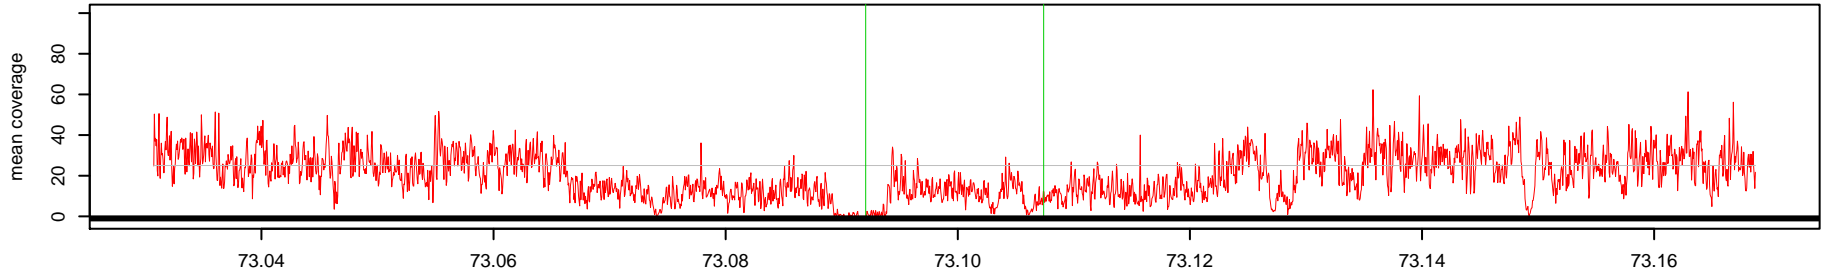

Log2( AK1 read depth / NA10851 read depth)

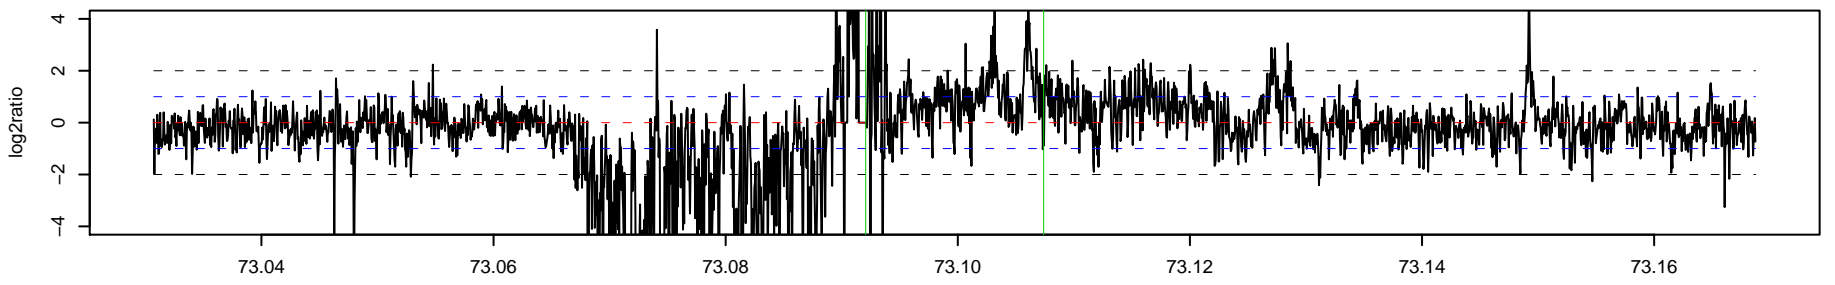

550\_AK1 Chr 14 : 77365670 – 77366883 , 1214 bp (aCGH relative log2ratio= -1.00 )

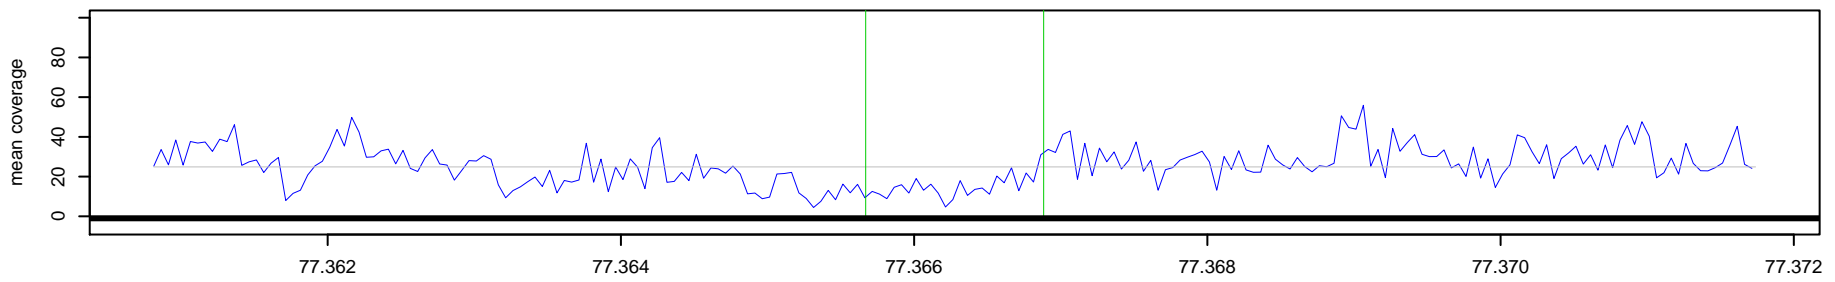

550\_NA10851 Chr 14 : 77365670 – 77366883 , 1214 bp (aCGH relative log2ratio= -1.00 )

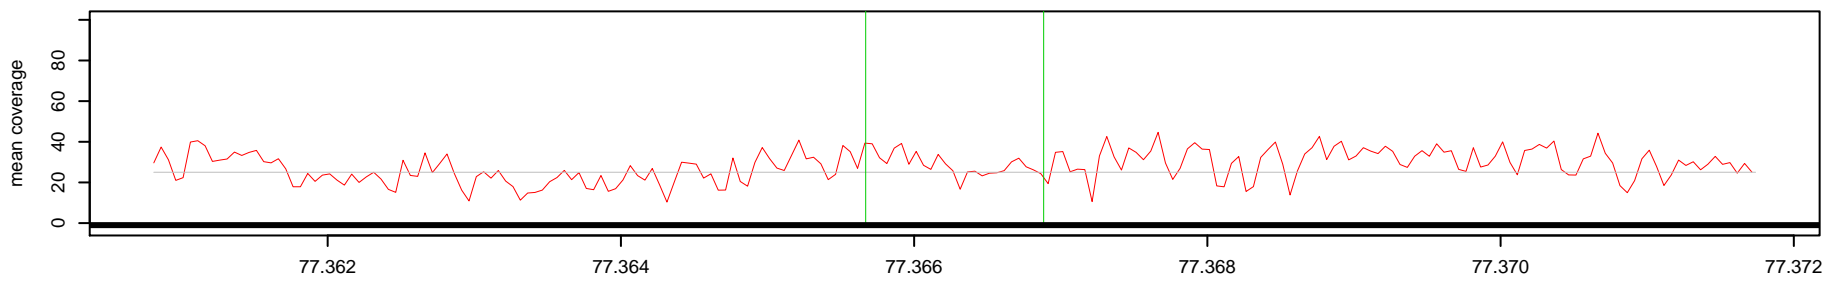

Log2( AK1 read depth / NA10851 read depth)

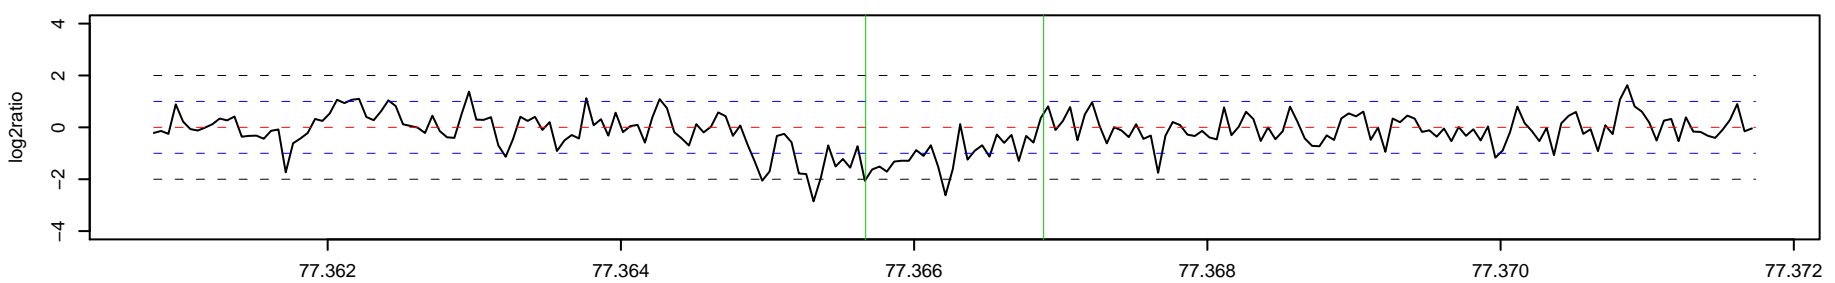

551 \_ AK1 Chr 14 : 79176019 – 79184422 , 8404 bp (aCGH relative log2ratio= 0.77 )

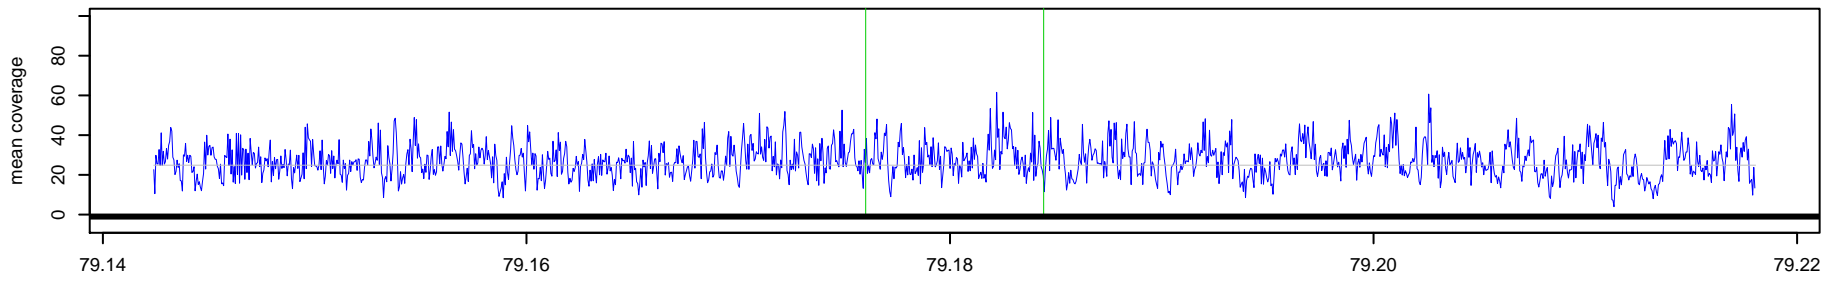

551 \_ NA10851 Chr 14 : 79176019 – 79184422 , 8404 bp (aCGH relative log2ratio= 0.77 )

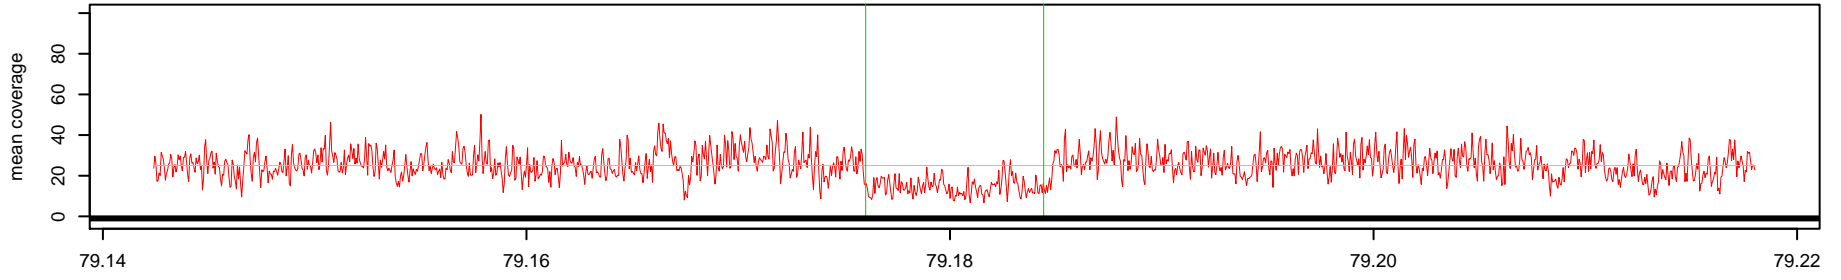

Log2( AK1 read depth / NA10851 read depth)

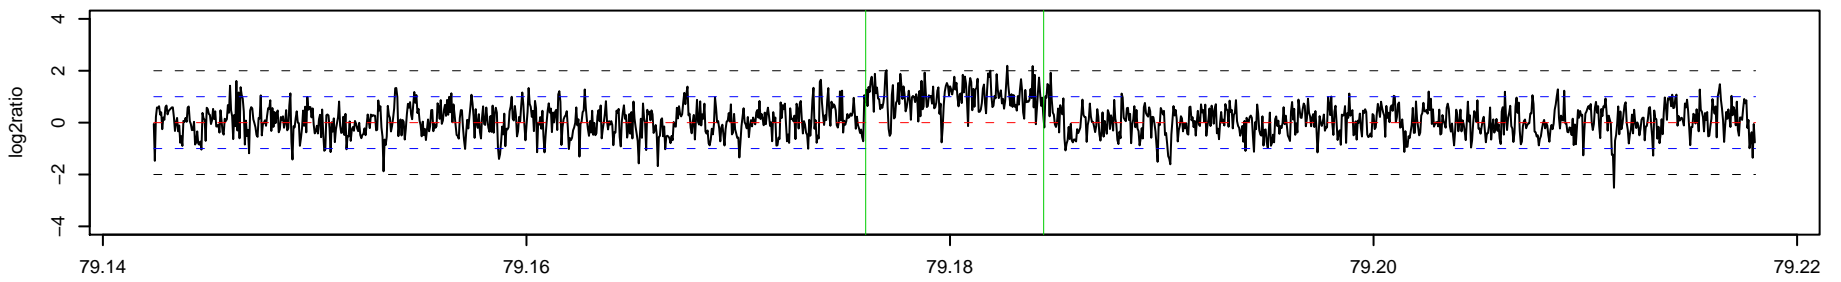

552 \_ AK1 Chr 14 : 79399375 – 79399828 , 454 bp (aCGH relative log2ratio= 0.49 )

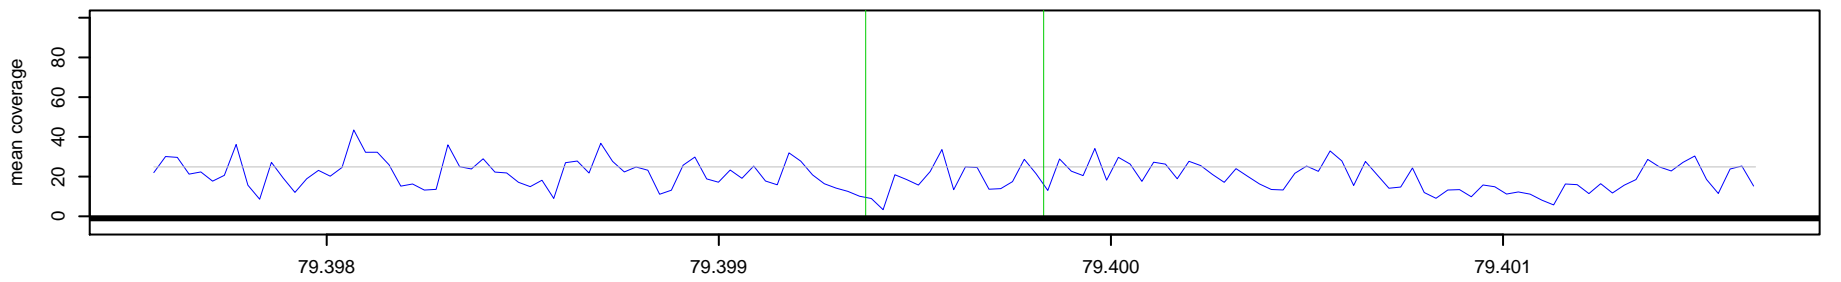

552 \_ NA10851 Chr 14 : 79399375 – 79399828 , 454 bp (aCGH relative log2ratio= 0.49 )

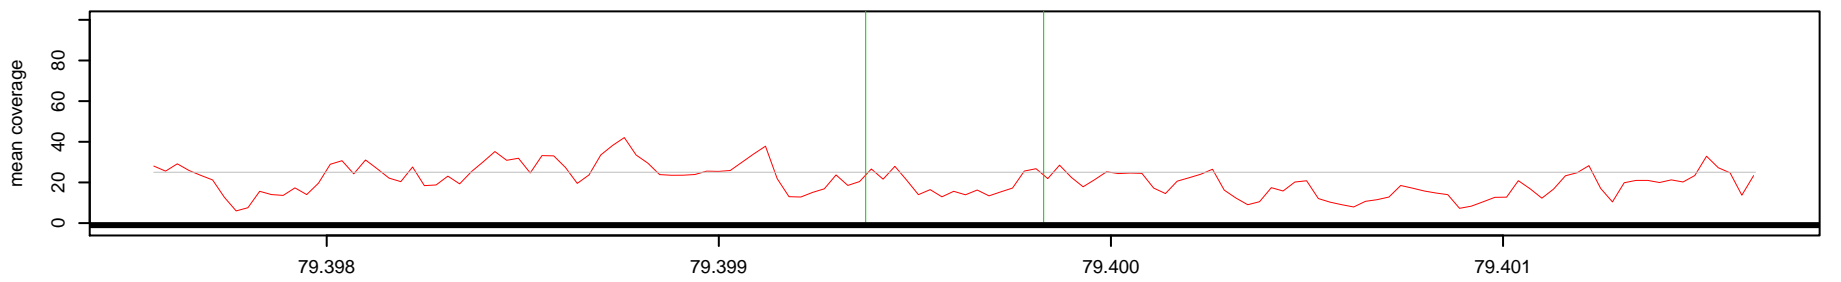

Log2( AK1 read depth / NA10851 read depth)

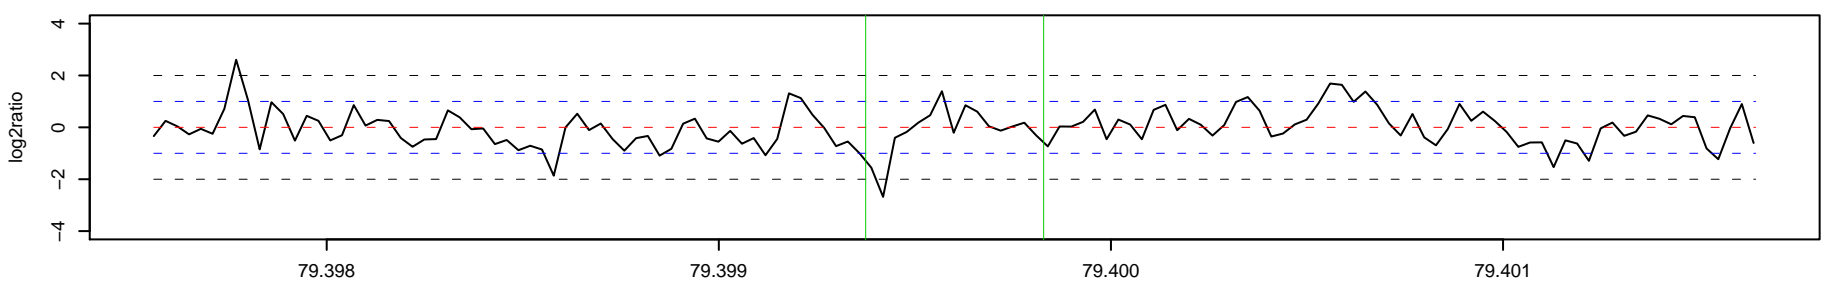



553\_AK1 Chr 14 : 82025856 - 82026418 , 563 bp (aCGH relative log2ratio= 0.62 )

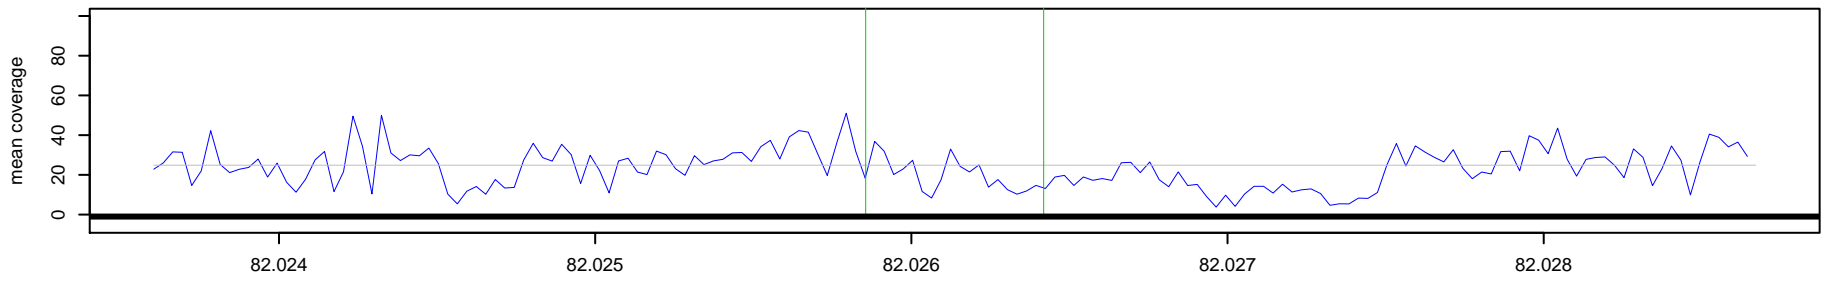

553\_NA10851 Chr 14 : 82025856 - 82026418 , 563 bp (aCGH relative log2ratio= 0.62 )

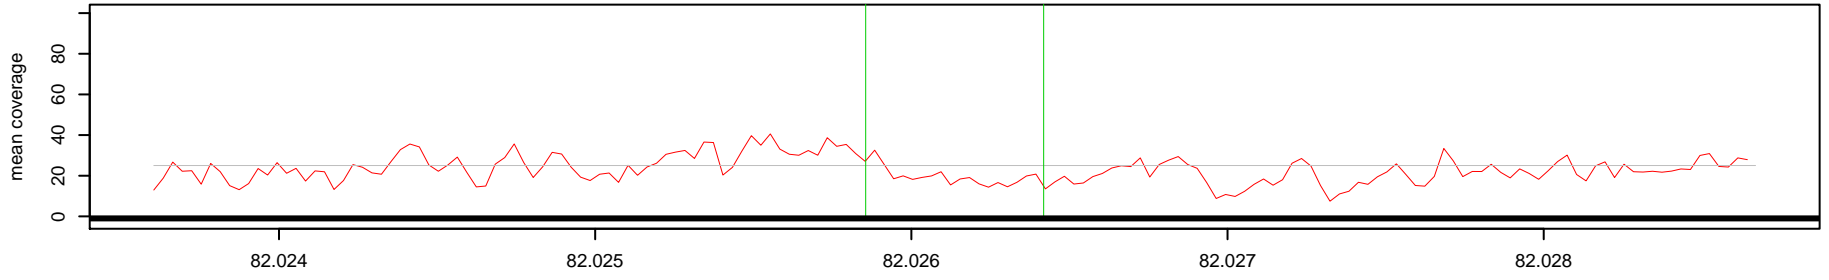

Log2( AK1 read depth / NA10851 read depth)

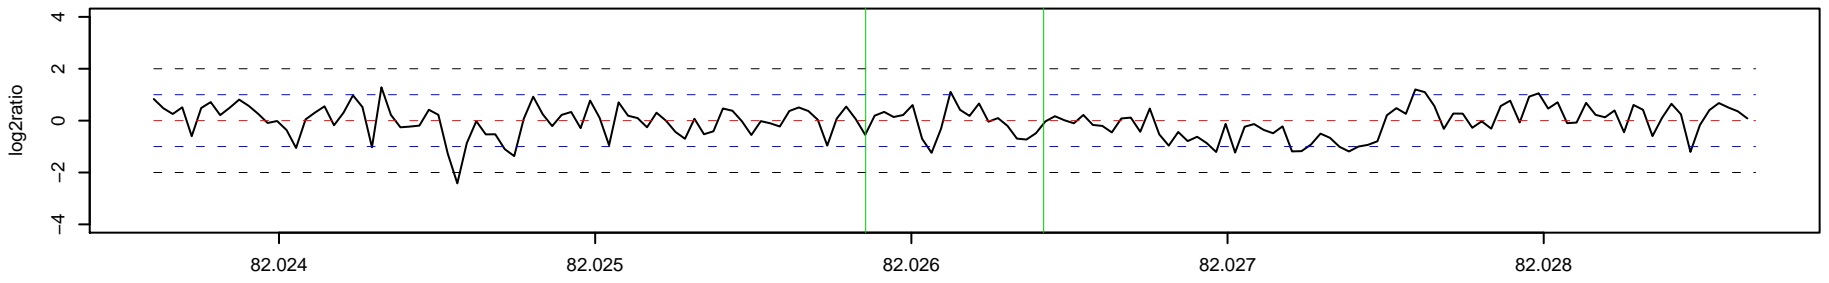

554\_AK1 Chr 14 : 84208902 - 84209432 , 531 bp (aCGH relative log2ratio= 0.88 )

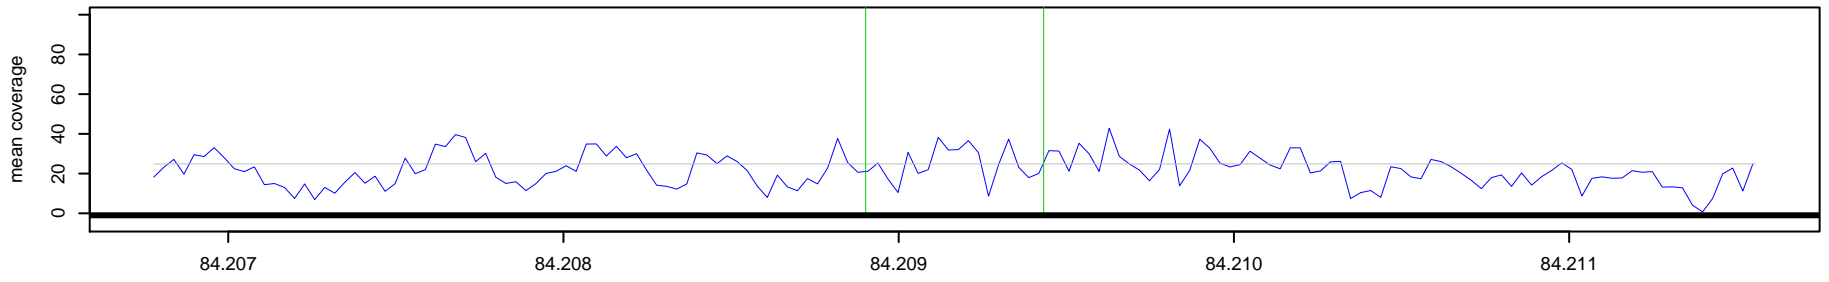

554\_NA10851 Chr 14 : 84208902 - 84209432 , 531 bp (aCGH relative log2ratio= 0.88 )

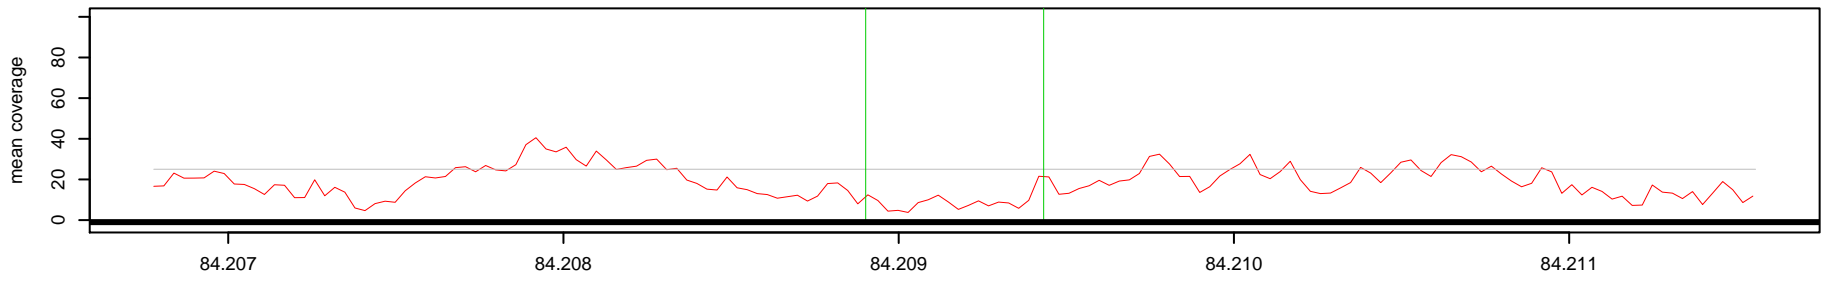

Log2( AK1 read depth / NA10851 read depth)

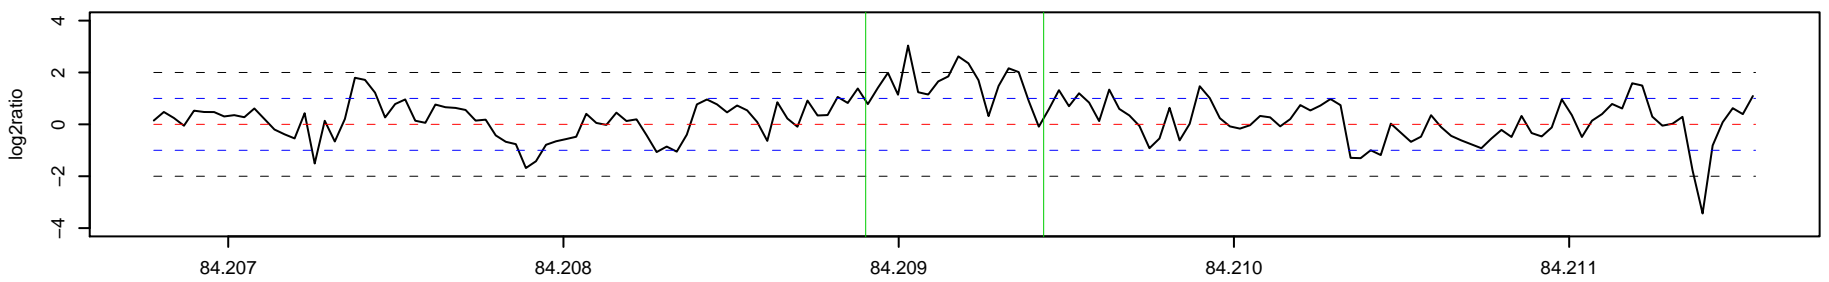

555 \_ AK1 Chr 14 : 84366810 – 84371845 , 5036 bp (aCGH relative log2ratio= 0.96 )

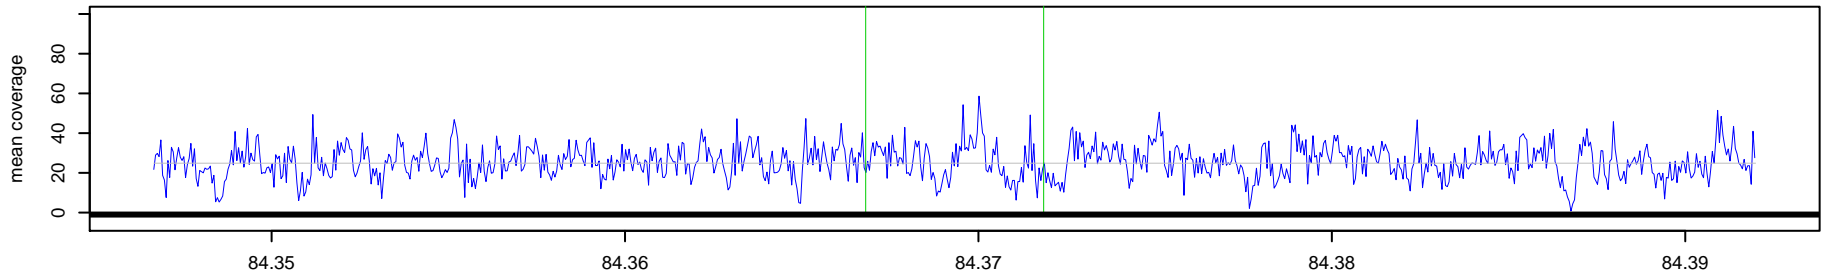

555 \_ NA10851 Chr 14 : 84366810 – 84371845 , 5036 bp (aCGH relative log2ratio= 0.96 )

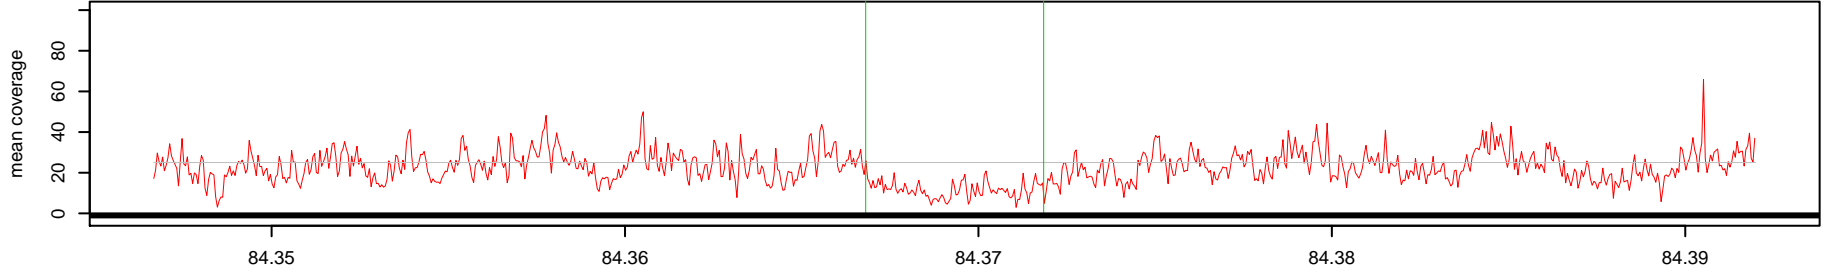

Log2( AK1 read depth / NA10851 read depth)

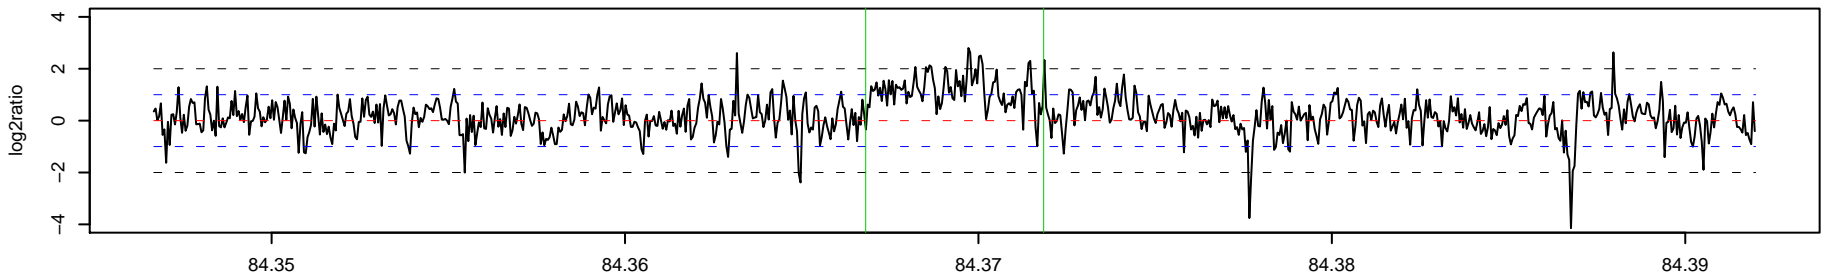

556 \_ AK1 Chr 14 : 87929850 – 87953125 , 23276 bp (aCGH relative log2ratio= 0.27 )

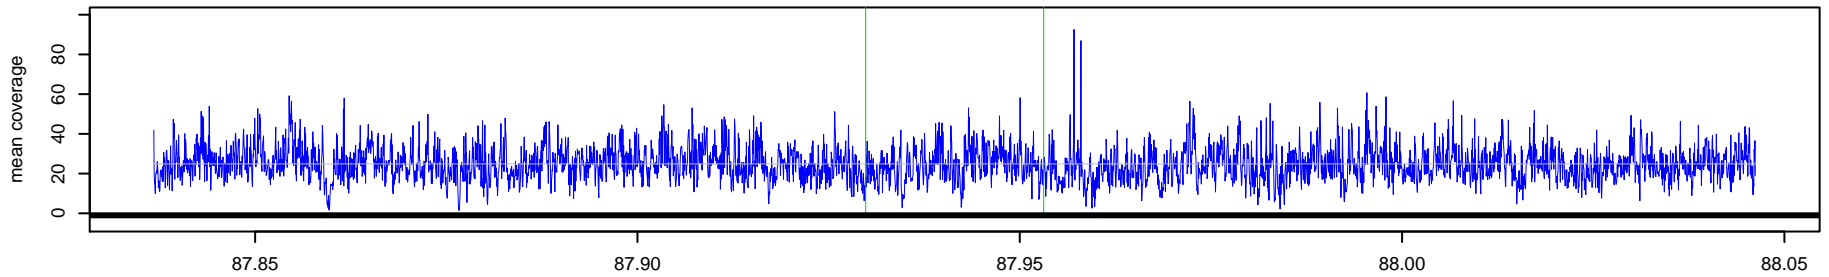

556 \_ NA10851 Chr 14 : 87929850 – 87953125 , 23276 bp (aCGH relative log2ratio= 0.27 )

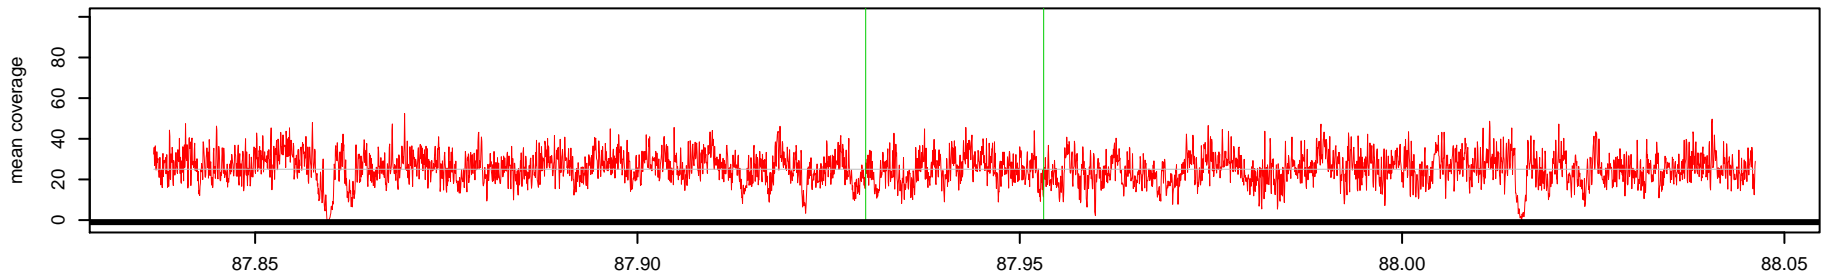

Log2( AK1 read depth / NA10851 read depth)

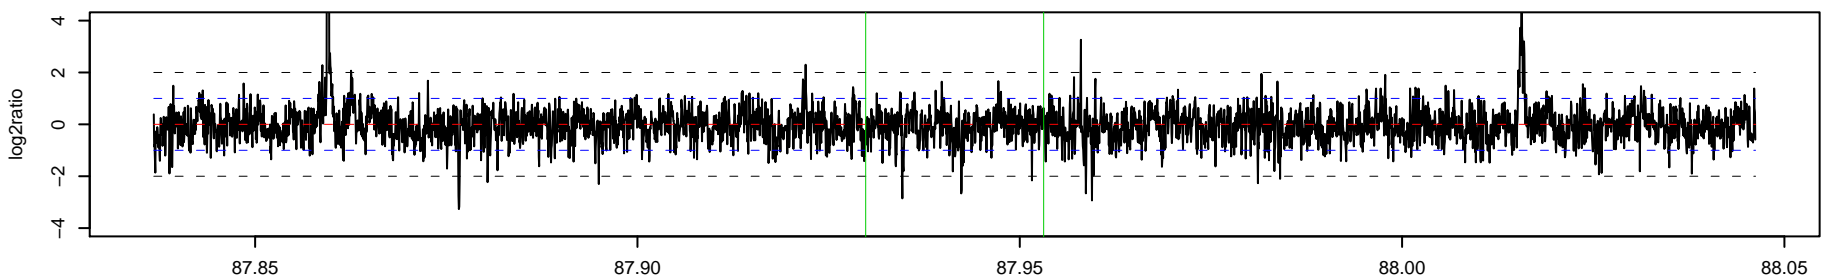

557\_AK1 Chr 14 : 92782228 - 92782899 , 672 bp (aCGH relative log2ratio= -0.84 )

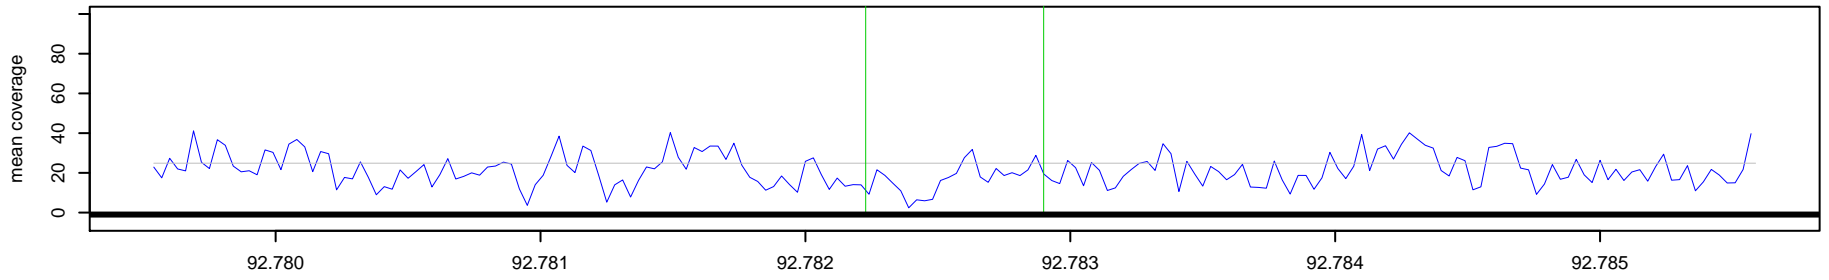

557\_NA10851 Chr 14 : 92782228 - 92782899 , 672 bp (aCGH relative log2ratio= -0.84 )

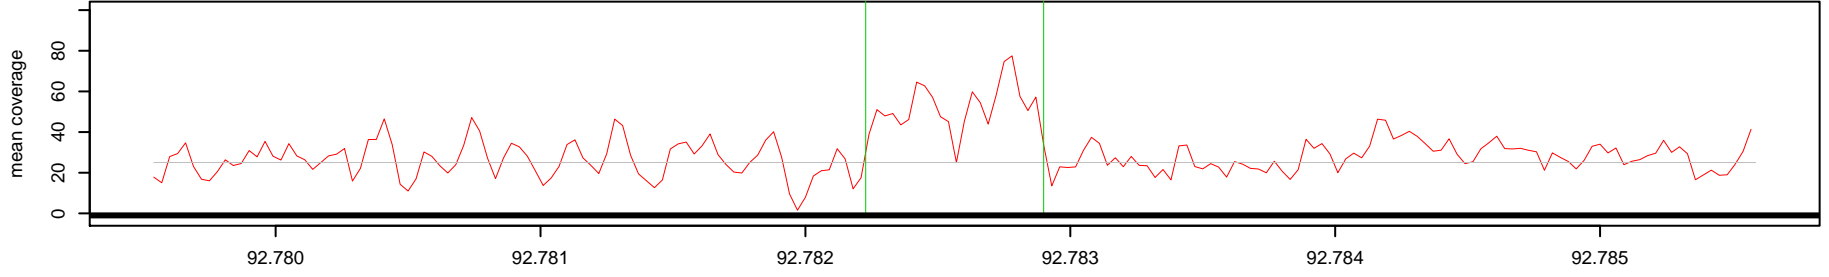

Log2( AK1 read depth / NA10851 read depth)

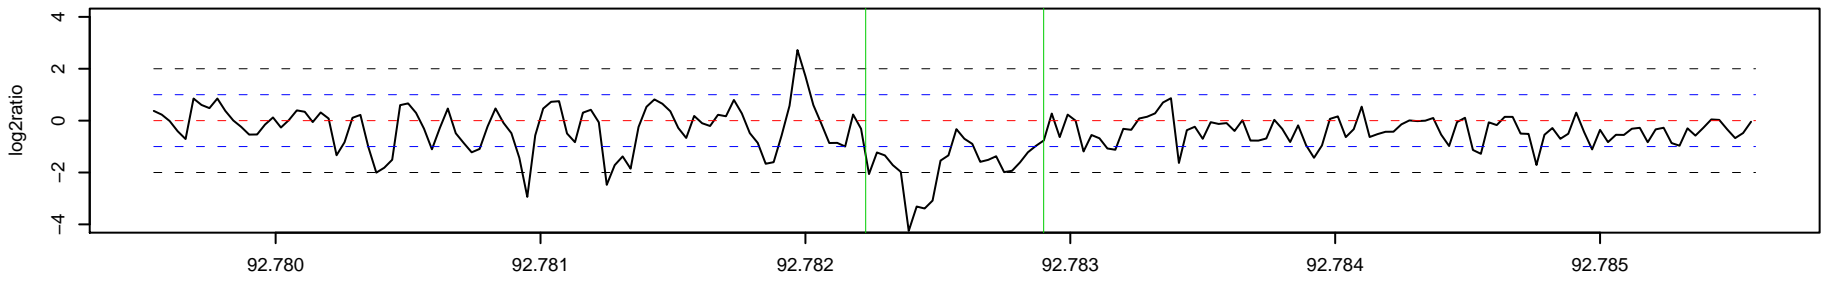

558\_AK1 Chr 14 : 105314054 - 105851462 , 537409 bp (aCGH relative log2ratio= 0.38 )

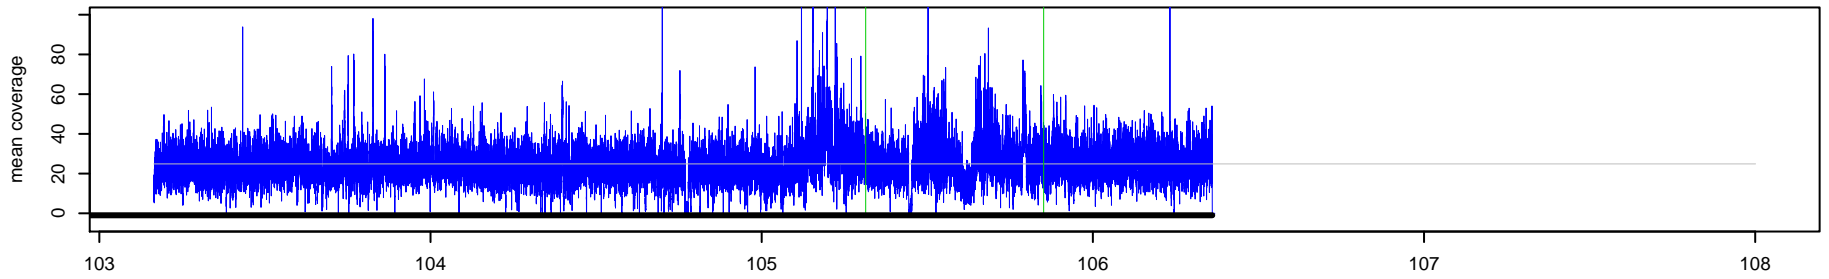

558\_NA10851 Chr 14 : 105314054 - 105851462 , 537409 bp (aCGH relative log2ratio= 0.38 )

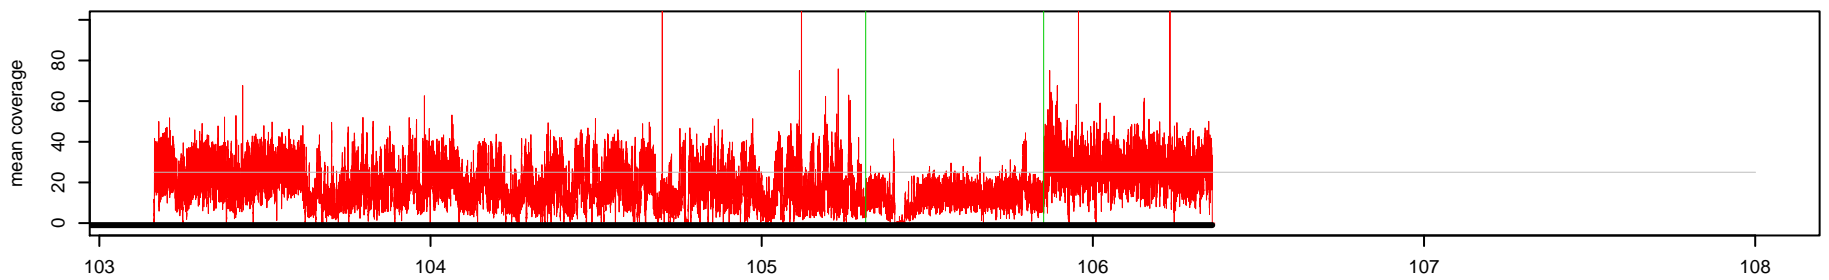

Log2( AK1 read depth / NA10851 read depth)

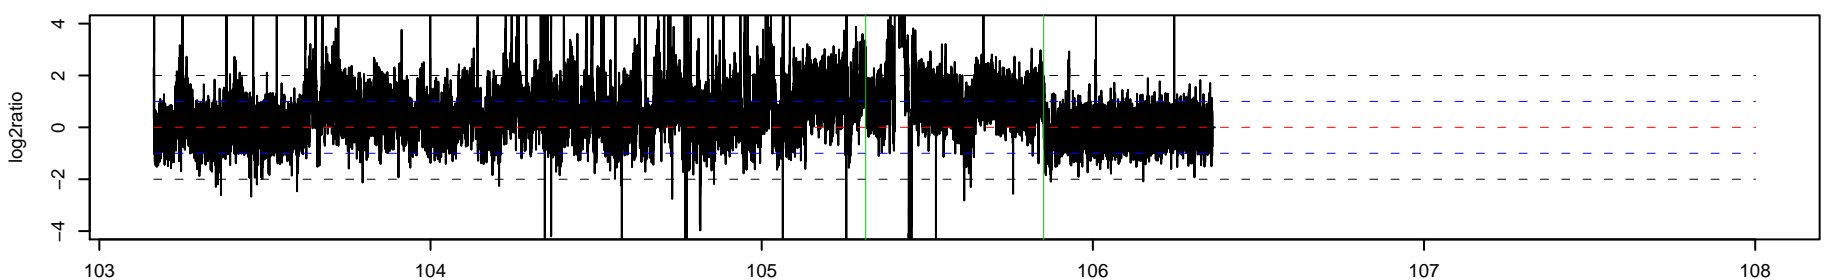

559\_AK1 Chr 14 : 105405180 – 105414992 , 9813 bp (aCGH relative log2ratio= 2.35 )

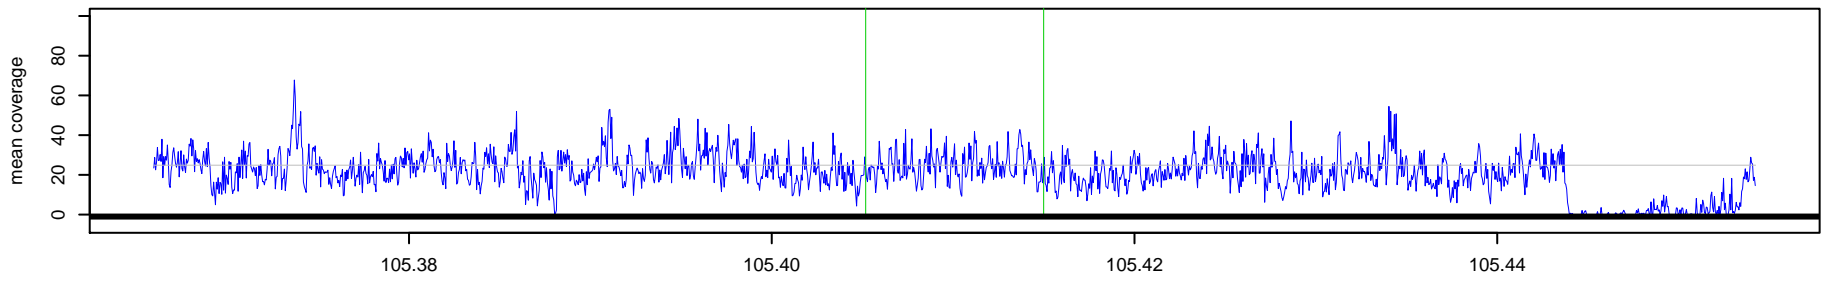

559\_NA10851 Chr 14 : 105405180 – 105414992 , 9813 bp (aCGH relative log2ratio= 2.35 )

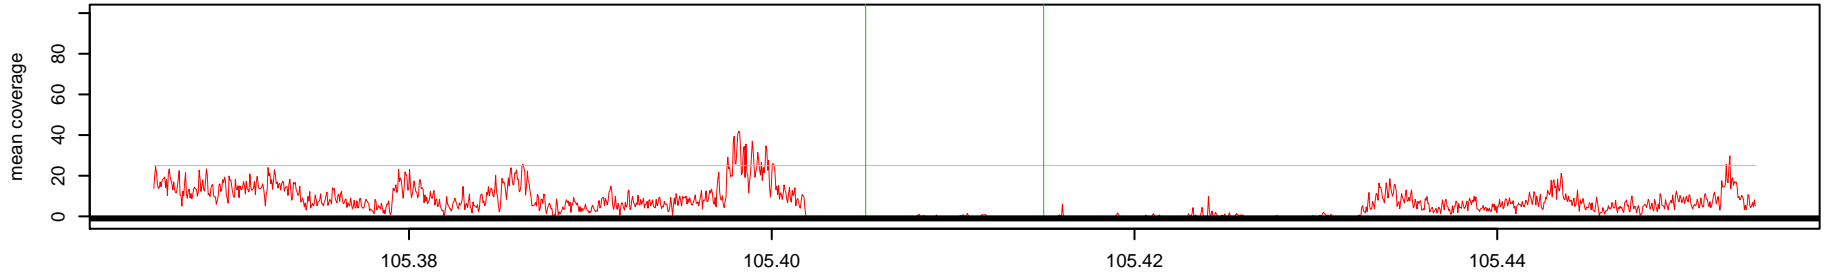

Log2( AK1 read depth / NA10851 read depth)

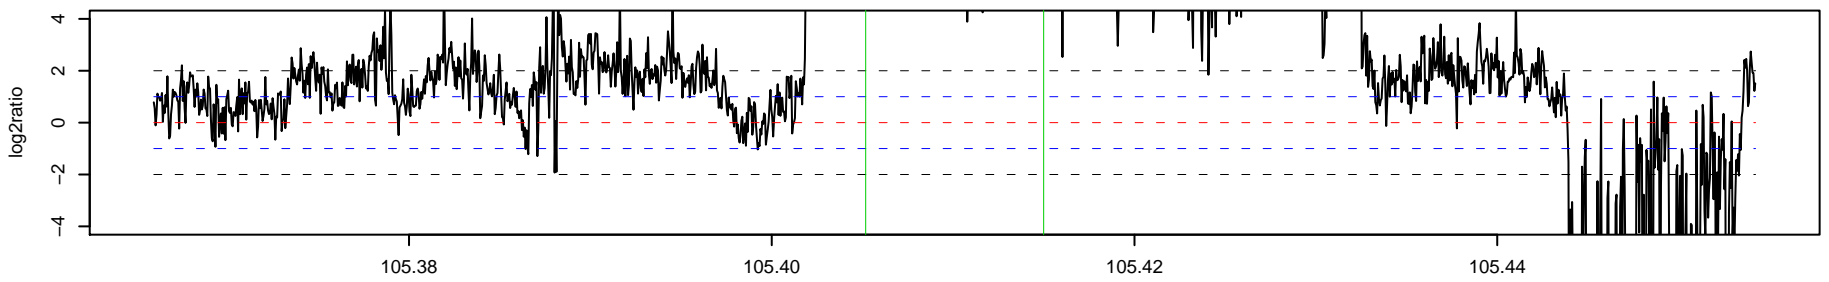

560\_AK1 Chr 14 : 105443852 – 105449809 , 5958 bp (aCGH relative log2ratio= -0.45 )

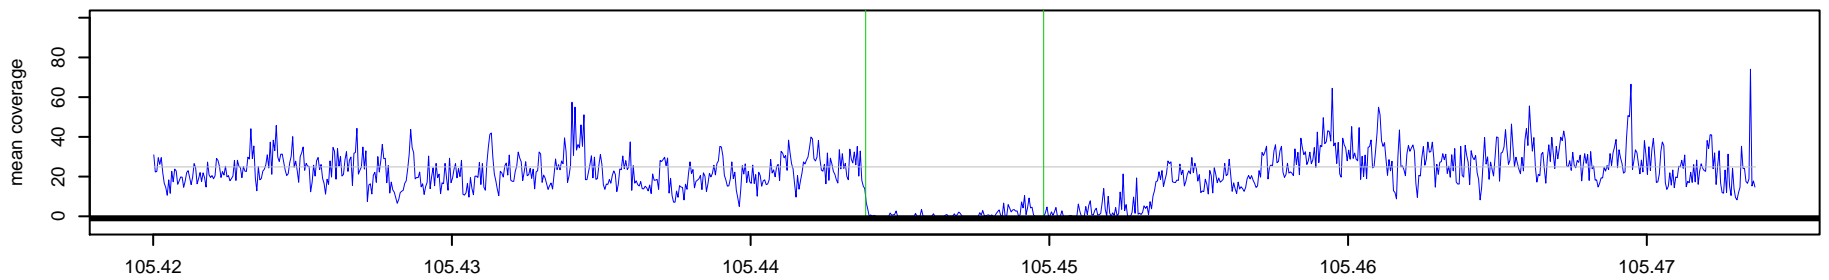

560\_NA10851 Chr 14 : 105443852 – 105449809 , 5958 bp (aCGH relative log2ratio= -0.45 )

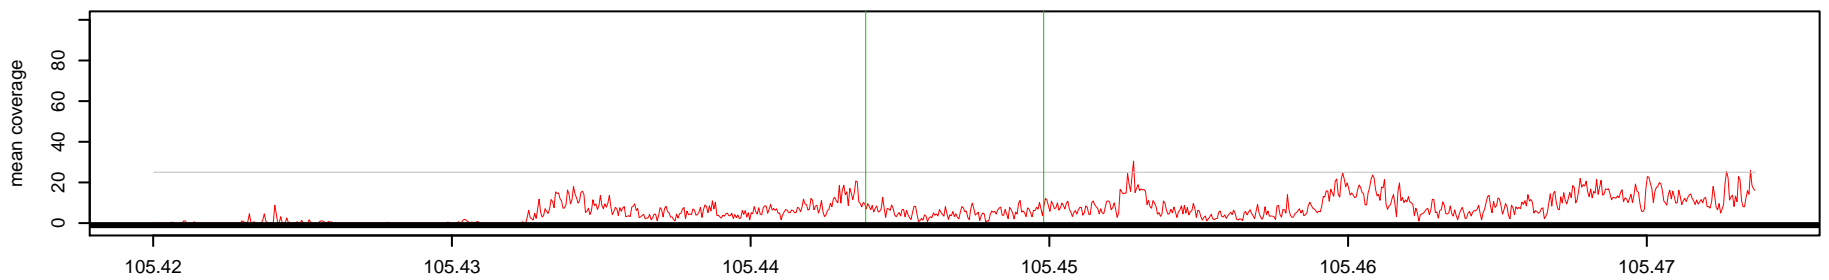

Log2( AK1 read depth / NA10851 read depth)

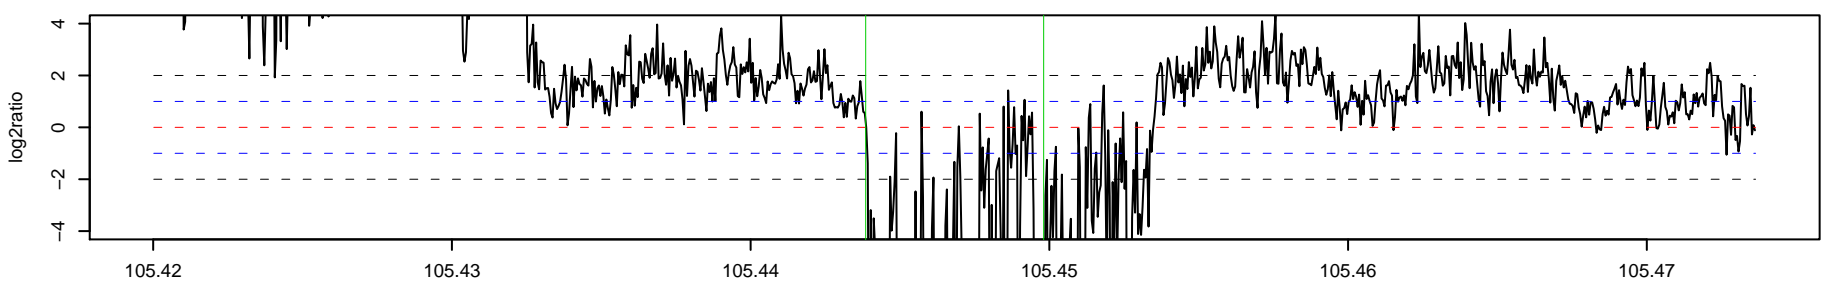

561 \_ AK1 Chr 14 : 105862867 – 105875937 , 13071 bp (aCGH relative log2ratio= -0.55 )

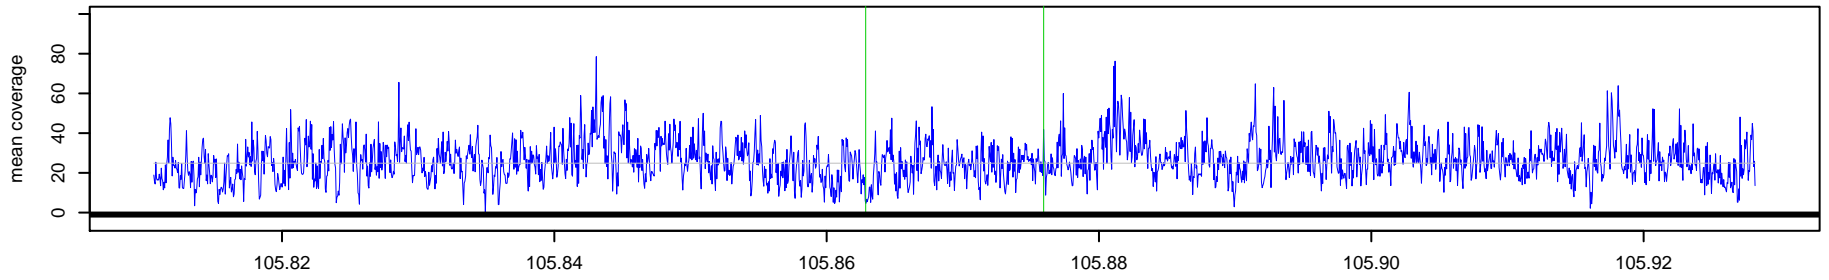

561 \_ NA10851 Chr 14 : 105862867 – 105875937 , 13071 bp (aCGH relative log2ratio= -0.55 )

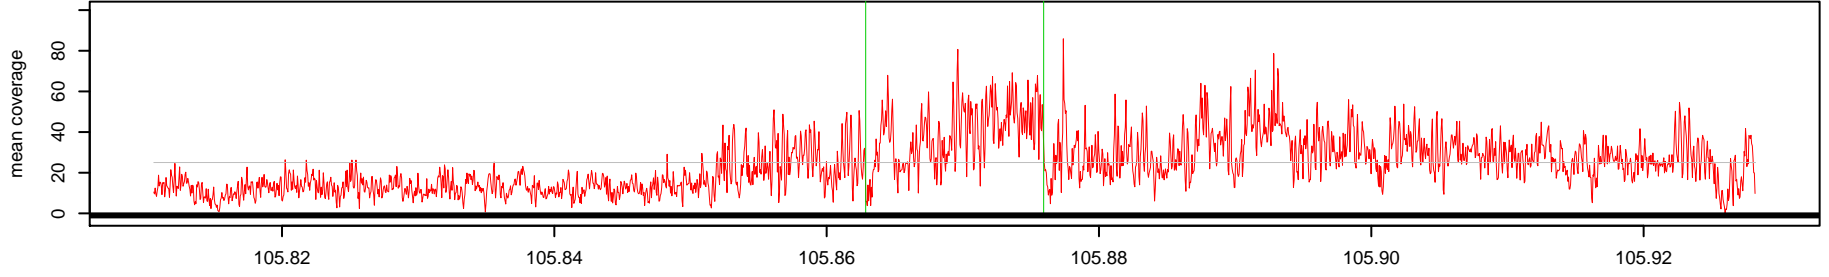

Log2( AK1 read depth / NA10851 read depth)

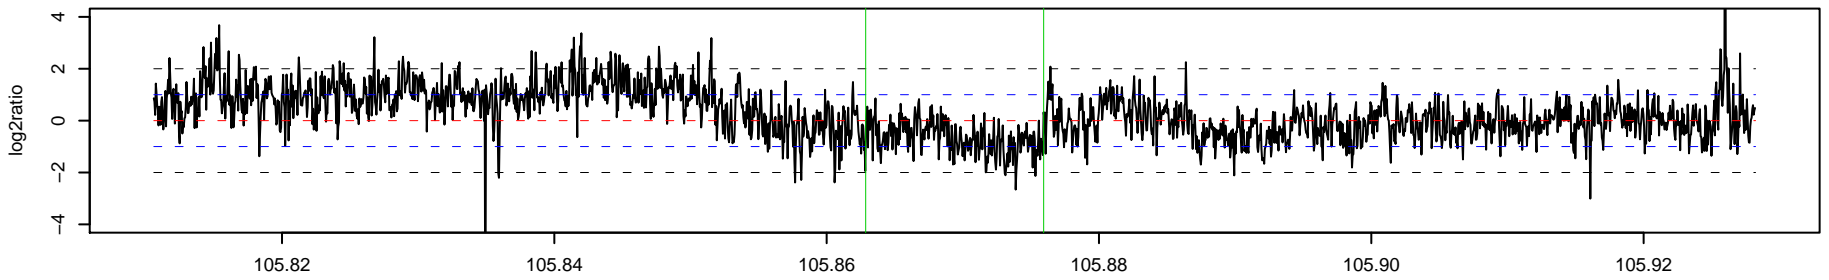

562 \_ AK1 Chr 15 : 18809804 – 20091316 , 128153 bp (aCGH relative log2ratio= 0.61 )

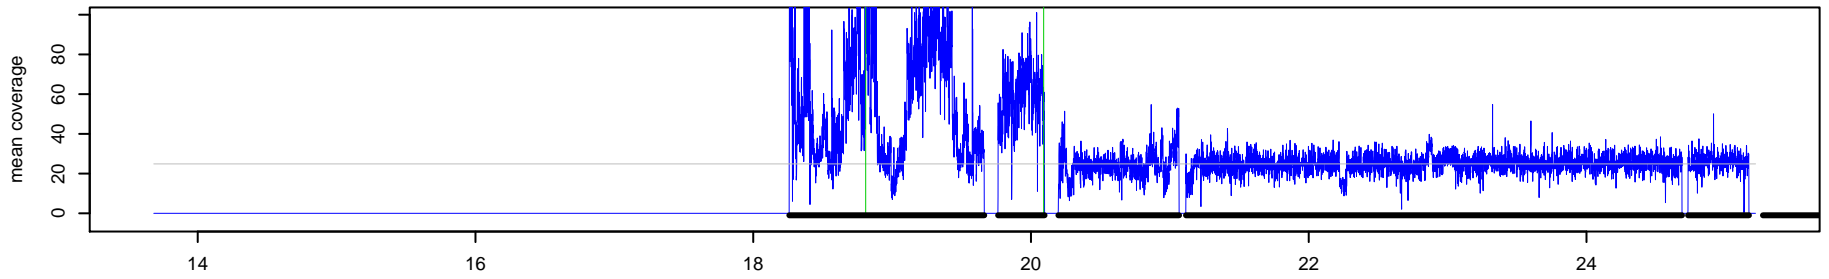

562 \_ NA10851 Chr 15 : 18809804 – 20091316 , 128153 bp (aCGH relative log2ratio= 0.61 )

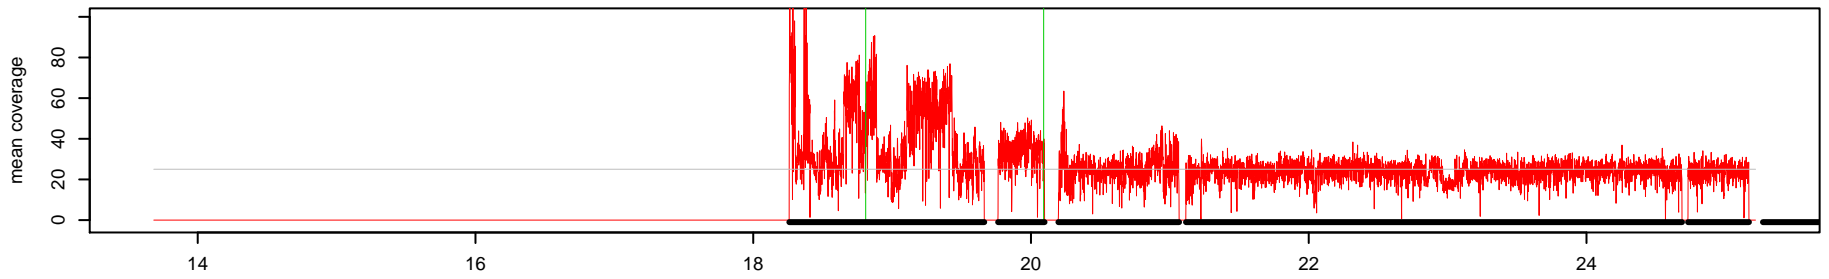

Log2( AK1 read depth / NA10851 read depth)

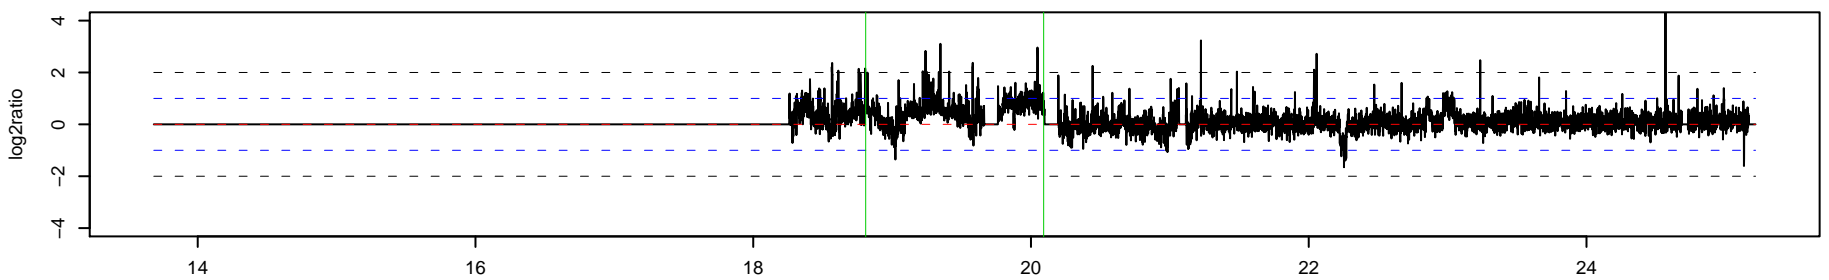

563\_AK1 Chr 15 : 21606450 – 21612807 , 6358 bp (aCGH relative log2ratio= 0.72 )

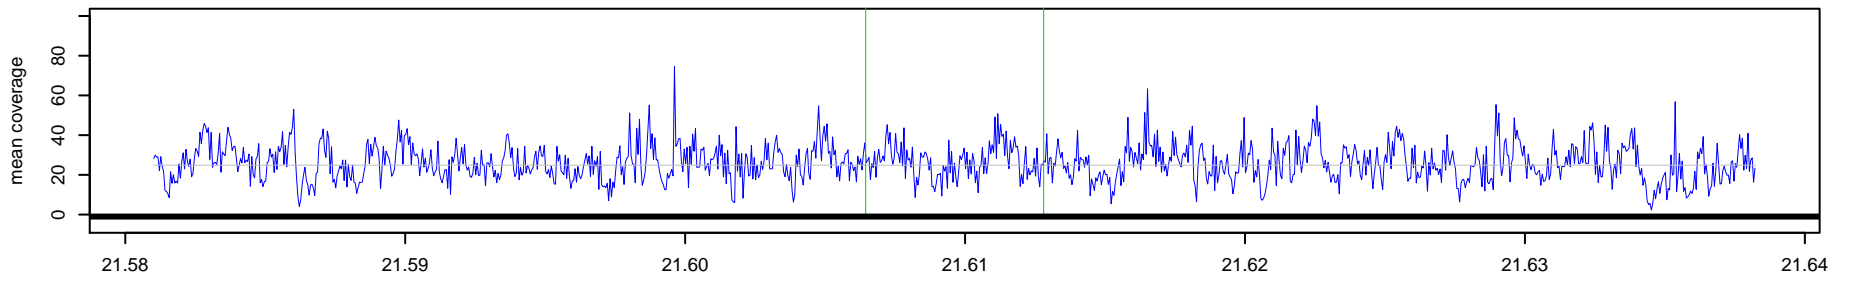

563\_NA10851 Chr 15 : 21606450 – 21612807 , 6358 bp (aCGH relative log2ratio= 0.72 )

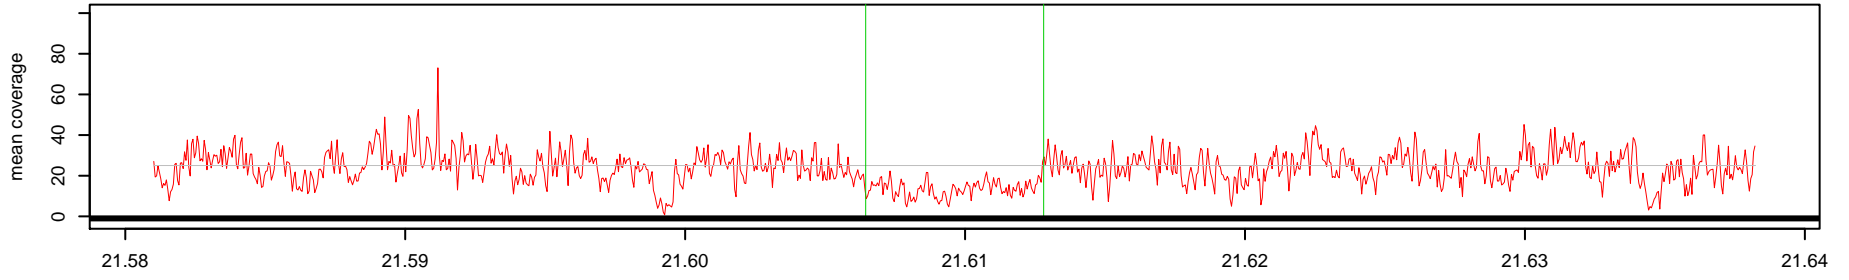

Log2( AK1 read depth / NA10851 read depth)

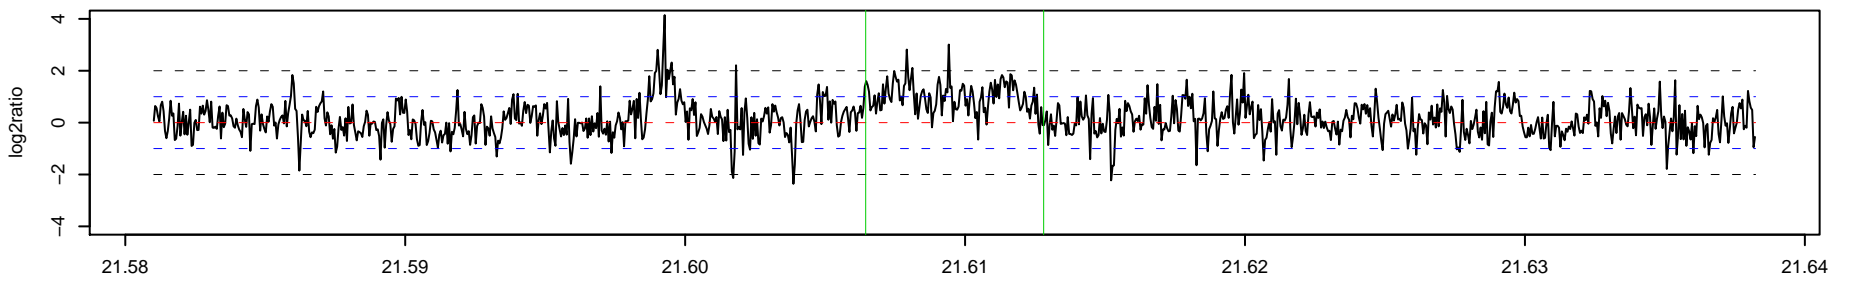

564\_AK1 Chr 15 : 22232258 – 22251317 , 19060 bp (aCGH relative log2ratio= -0.51 )

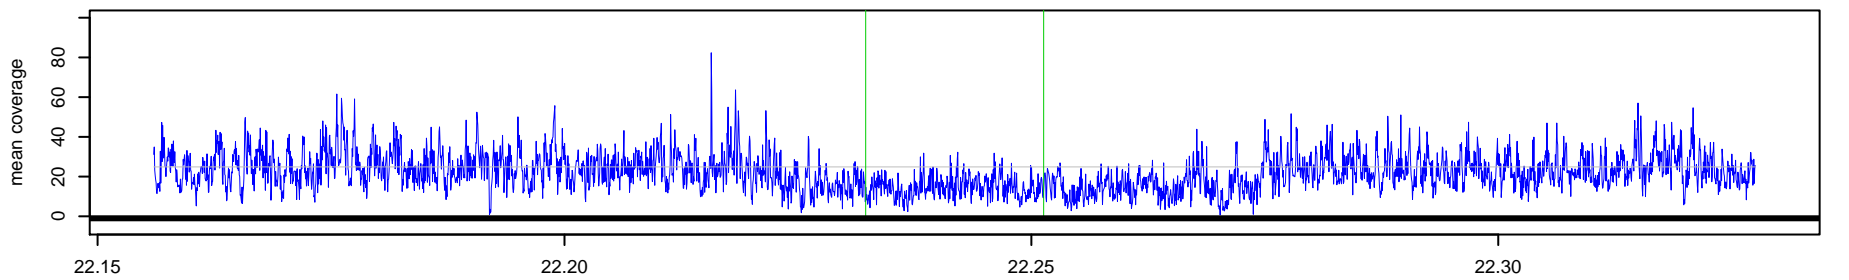

564\_NA10851 Chr 15 : 22232258 – 22251317 , 19060 bp (aCGH relative log2ratio= -0.51 )

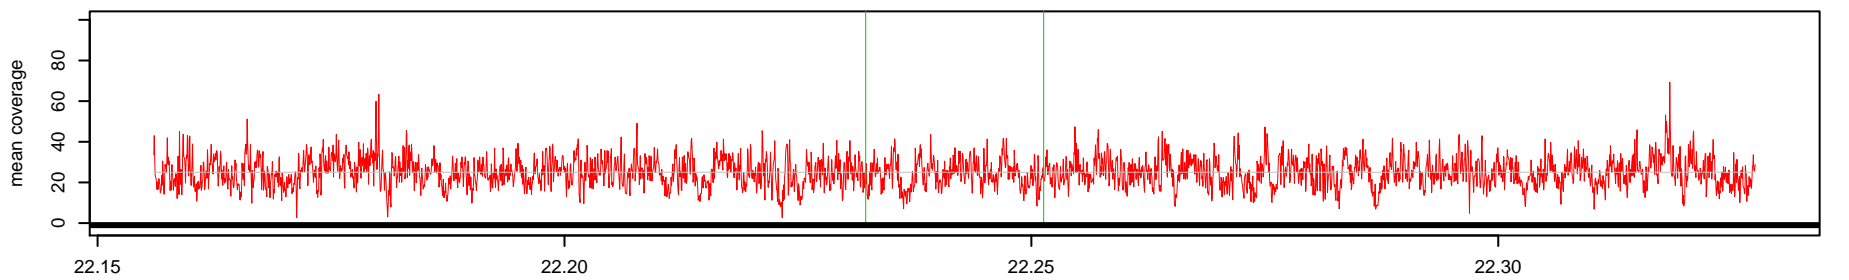

Log2( AK1 read depth / NA10851 read depth)

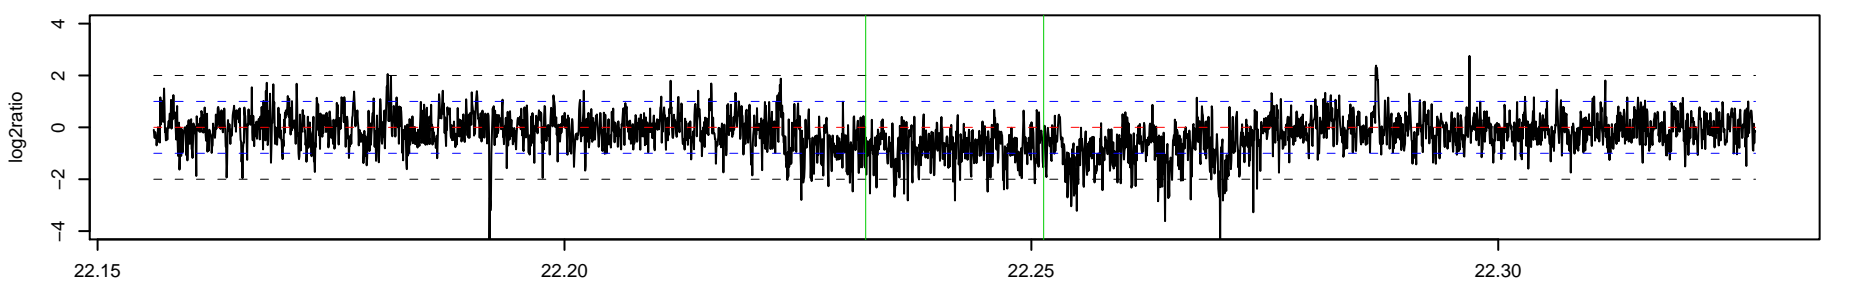

565 \_ AK1 Chr 15 : 22658078 - 22660235 , 2158 bp (aCGH relative log2ratio= -0.78 )

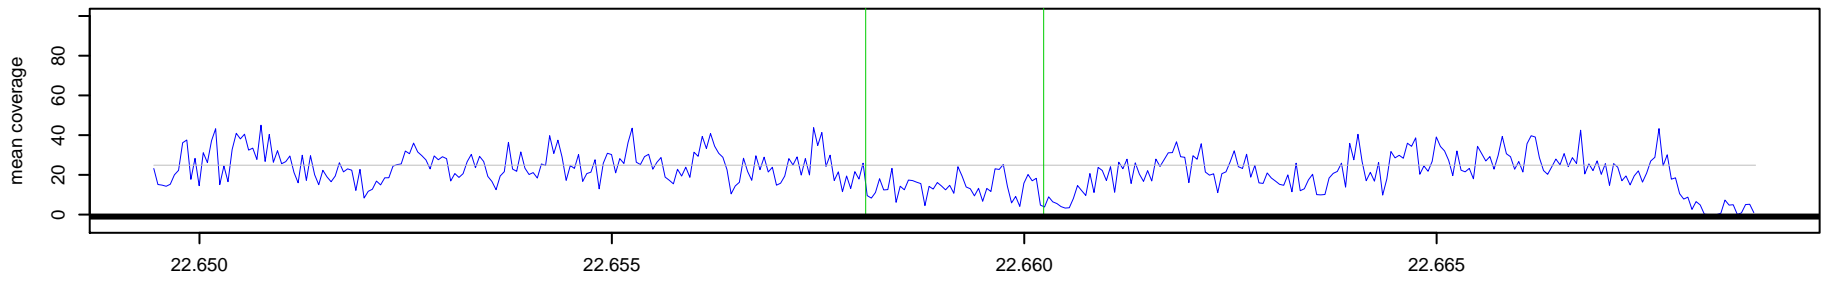

565 \_ NA10851 Chr 15 : 22658078 - 22660235 , 2158 bp (aCGH relative log2ratio= -0.78 )

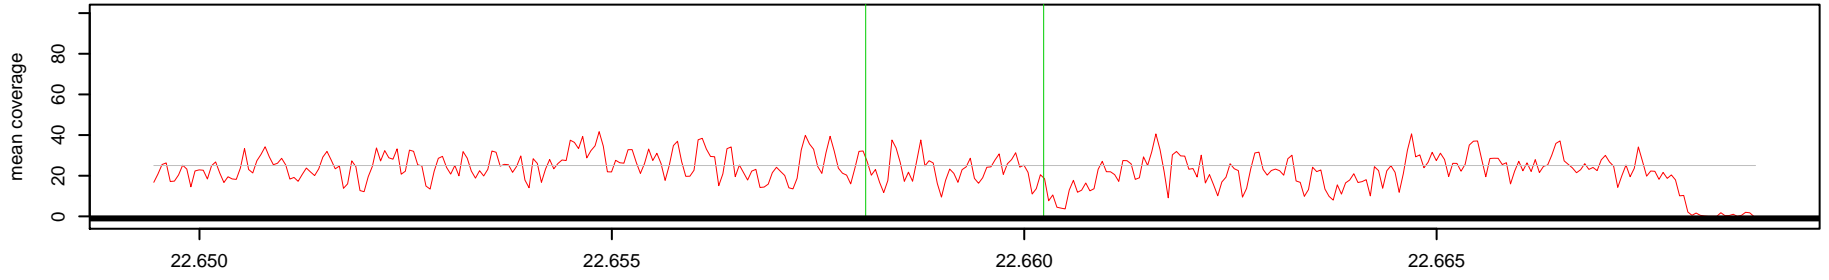

Log2( AK1 read depth / NA10851 read depth)

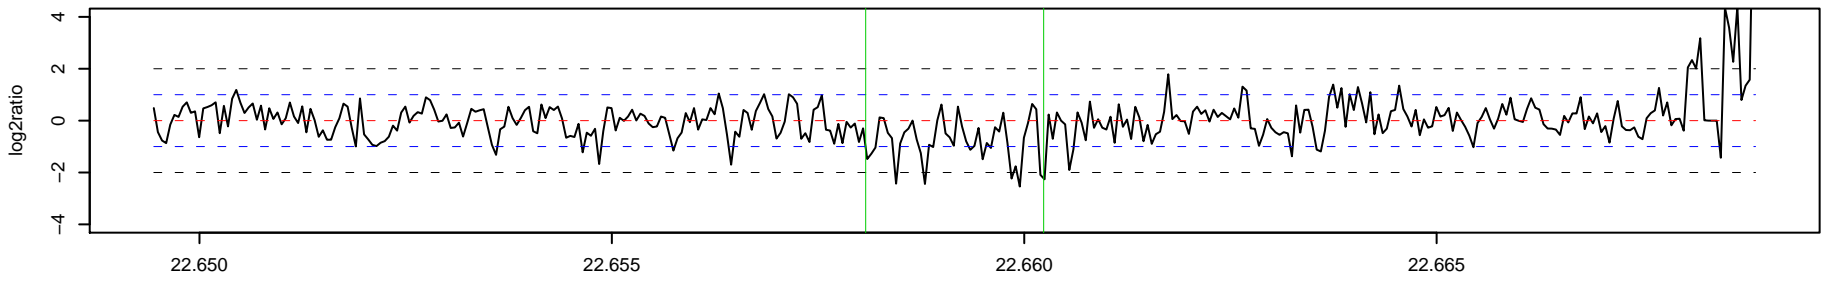

566 \_ AK1 Chr 15 : 24985922 - 24991919 , 5998 bp (aCGH relative log2ratio= 0.90 )

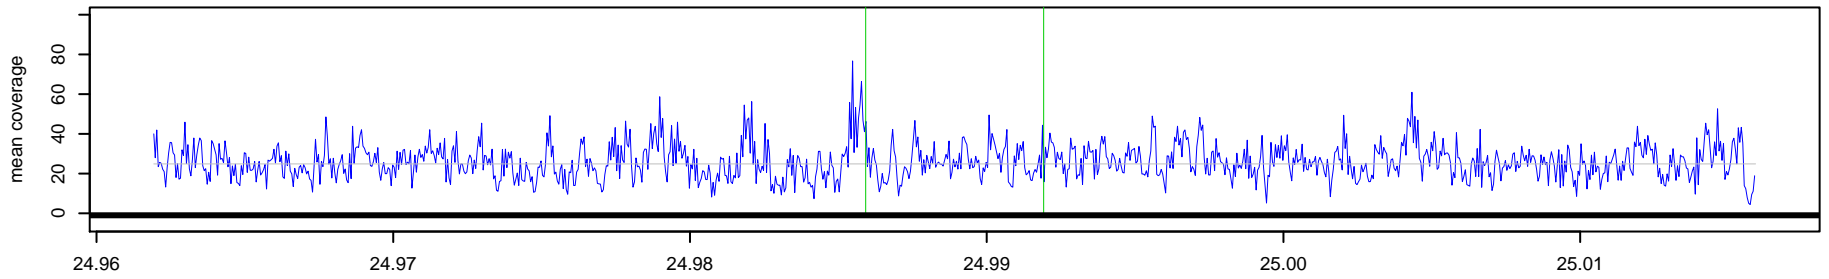

566 \_ NA10851 Chr 15 : 24985922 - 24991919 , 5998 bp (aCGH relative log2ratio= 0.90 )

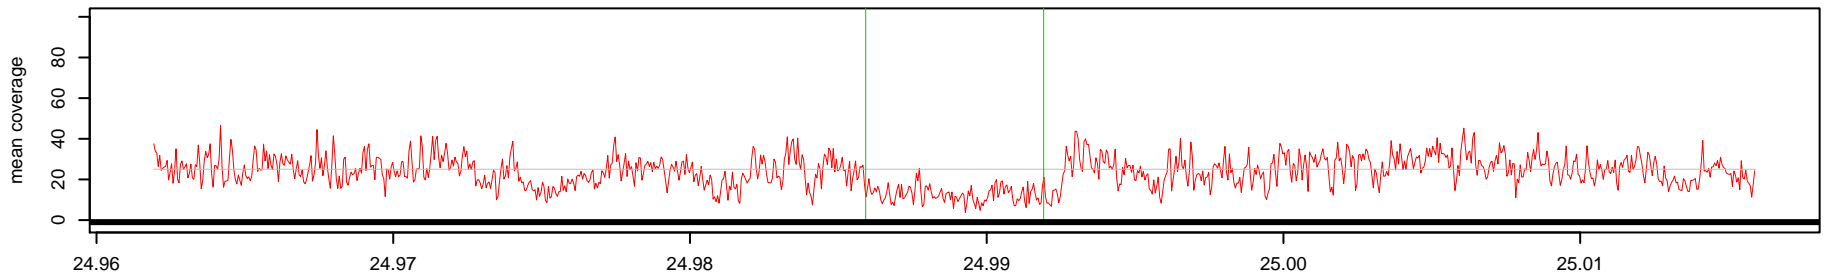

Log2( AK1 read depth / NA10851 read depth)

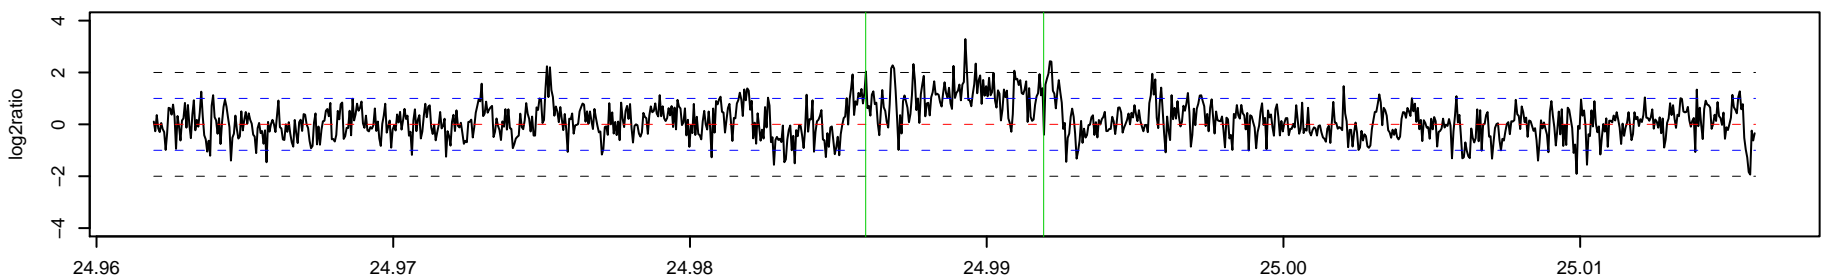

567 \_ AK1 Chr 15 : 25506938 – 25507504 , 567 bp (aCGH relative log2ratio= 0.58 )

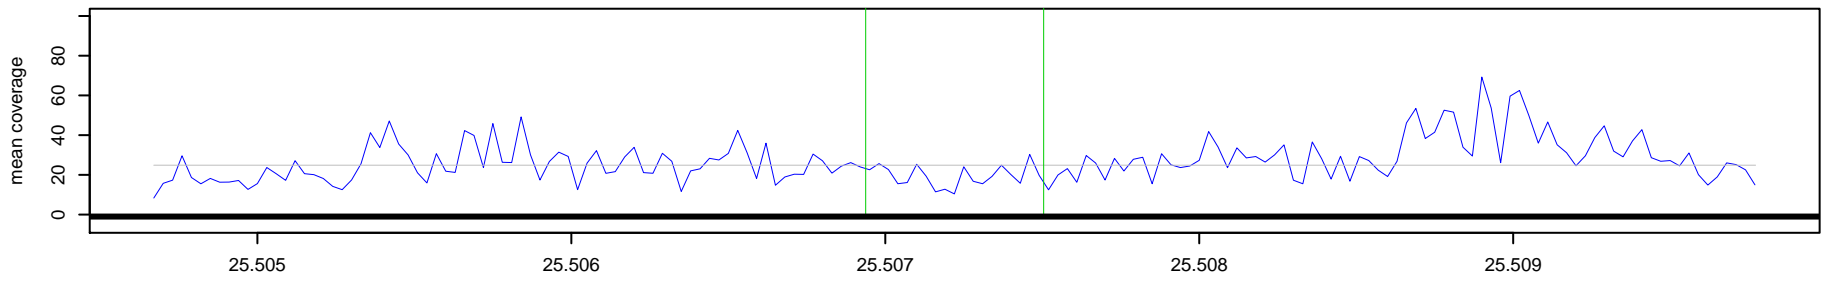

567 \_ NA10851 Chr 15 : 25506938 – 25507504 , 567 bp (aCGH relative log2ratio= 0.58 )

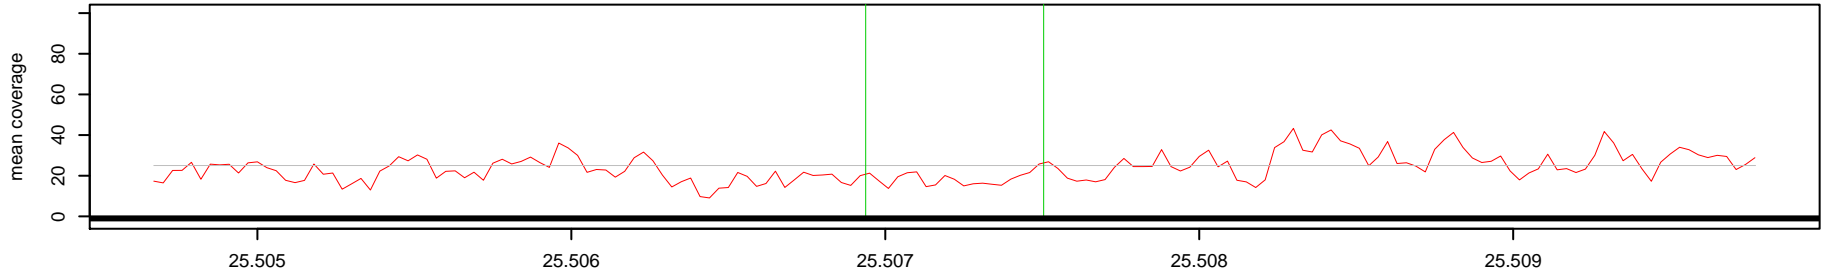

Log2( AK1 read depth / NA10851 read depth)

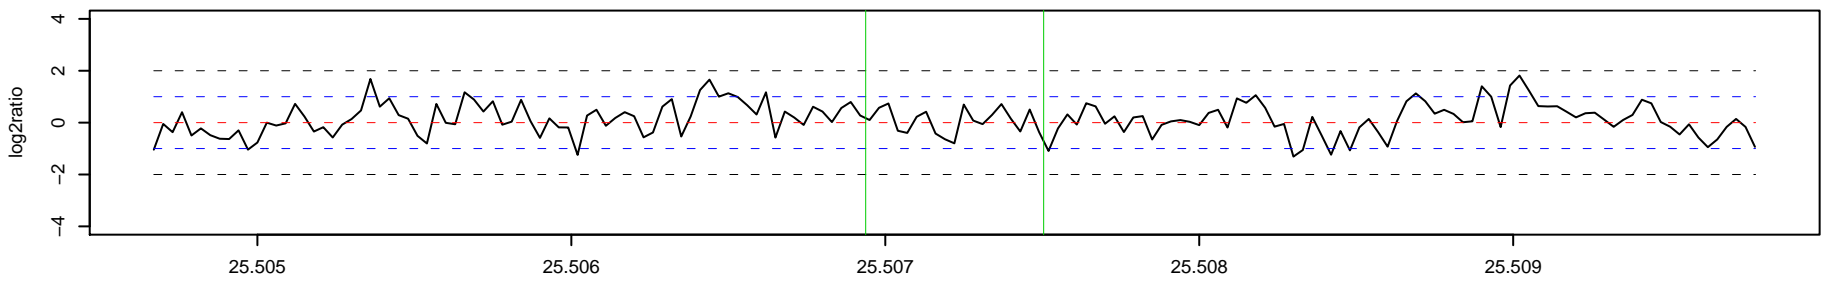

568 \_ AK1 Chr 15 : 32458666 – 32654761 , 196096 bp (aCGH relative log2ratio= 0.59 )

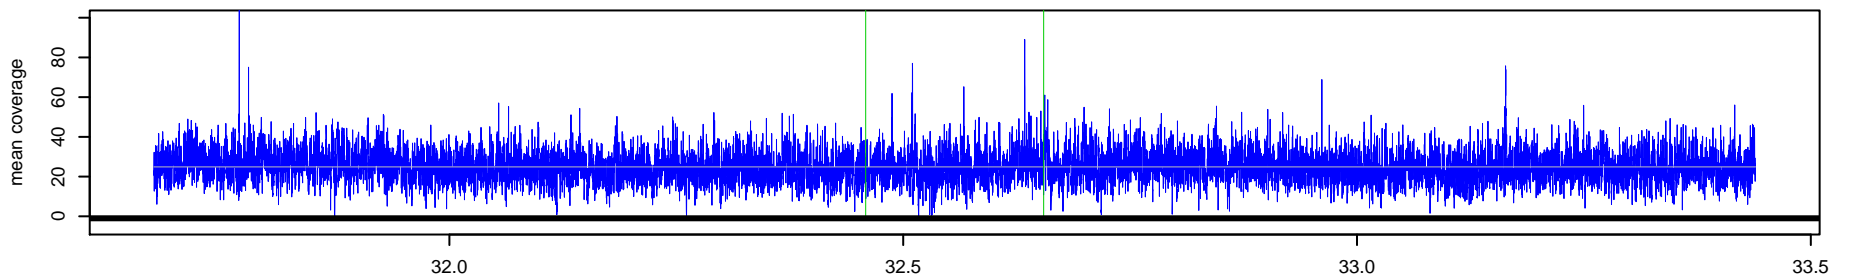

568 \_ NA10851 Chr 15 : 32458666 – 32654761 , 196096 bp (aCGH relative log2ratio= 0.59 )

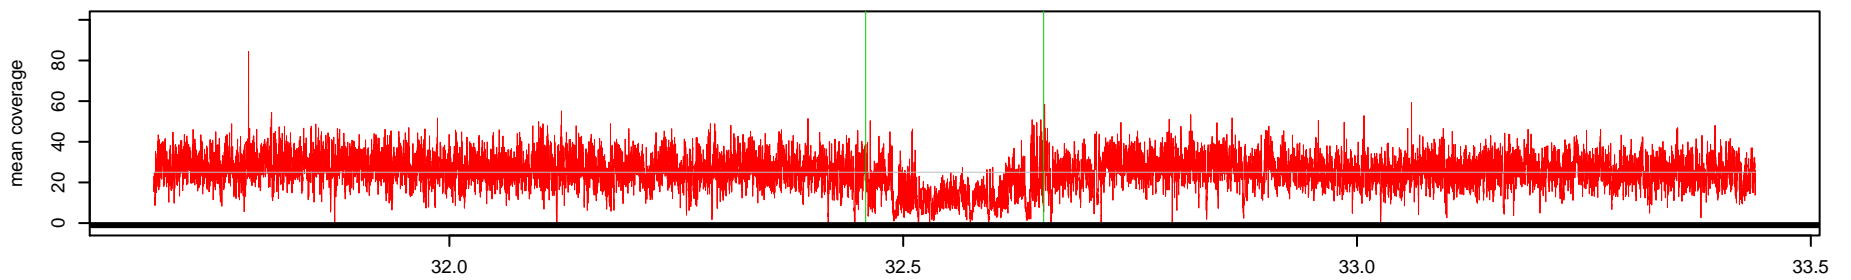

Log2( AK1 read depth / NA10851 read depth)

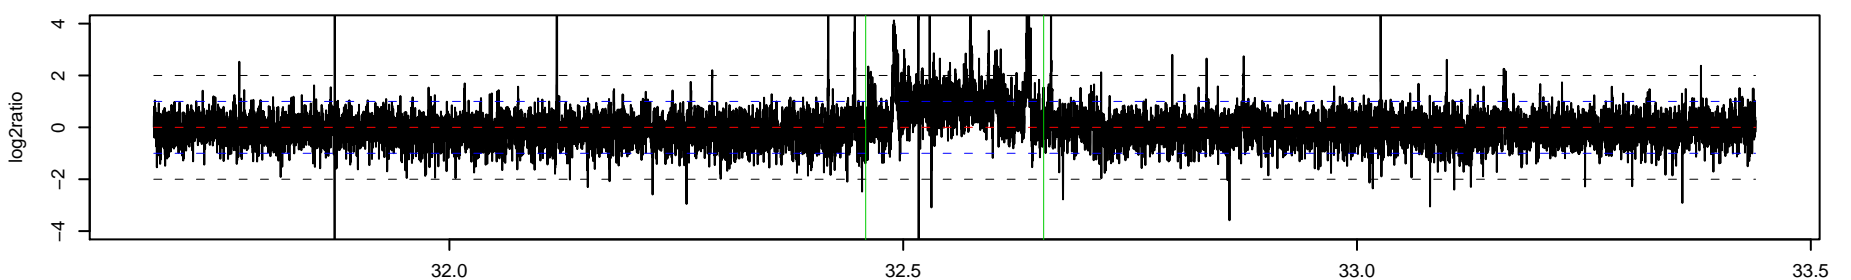



569\_AK1 Chr 15 : 37531658 - 37532162 , 505 bp (aCGH relative log2ratio= -0.99 )

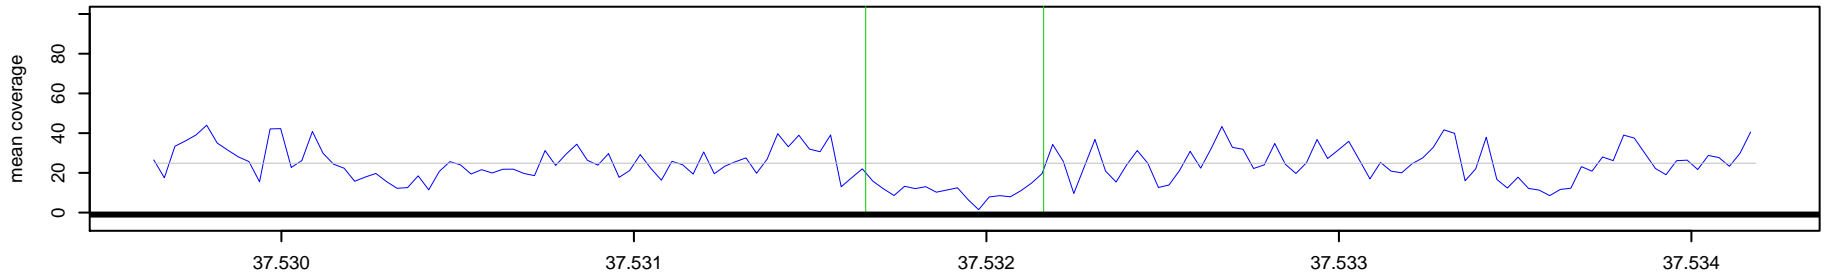

569\_NA10851 Chr 15 : 37531658 - 37532162 , 505 bp (aCGH relative log2ratio= -0.99 )

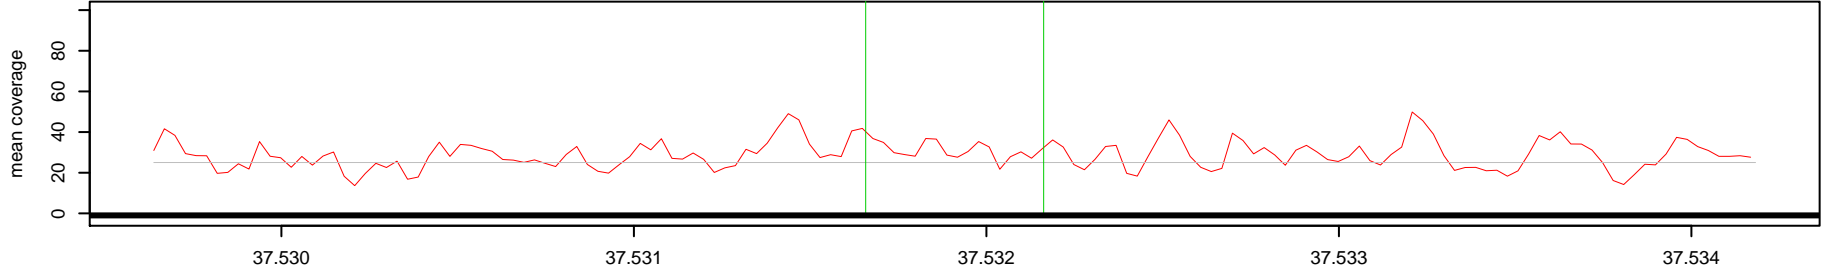

Log2( AK1 read depth / NA10851 read depth)

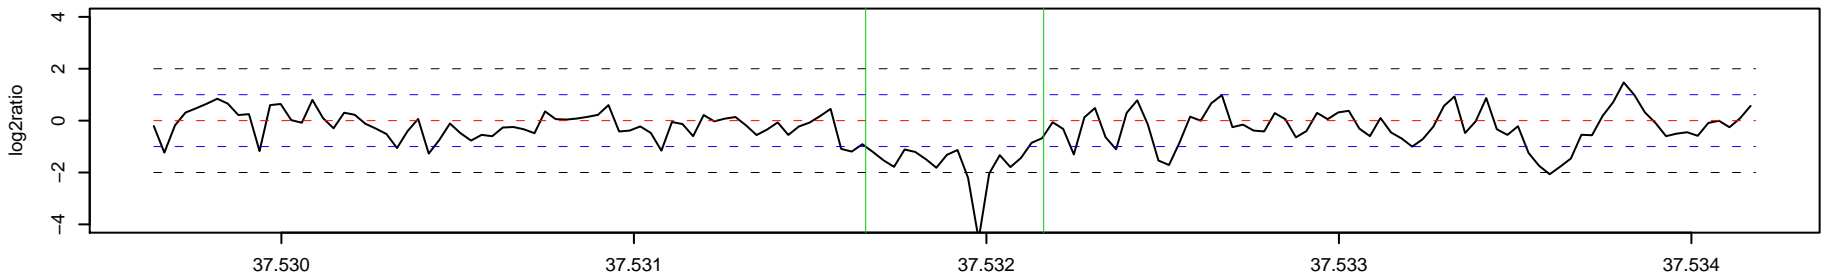

o

570\_AK1 Chr 15 : 41264606 - 41265515 , 910 bp (aCGH relative log2ratio= -0.53 )

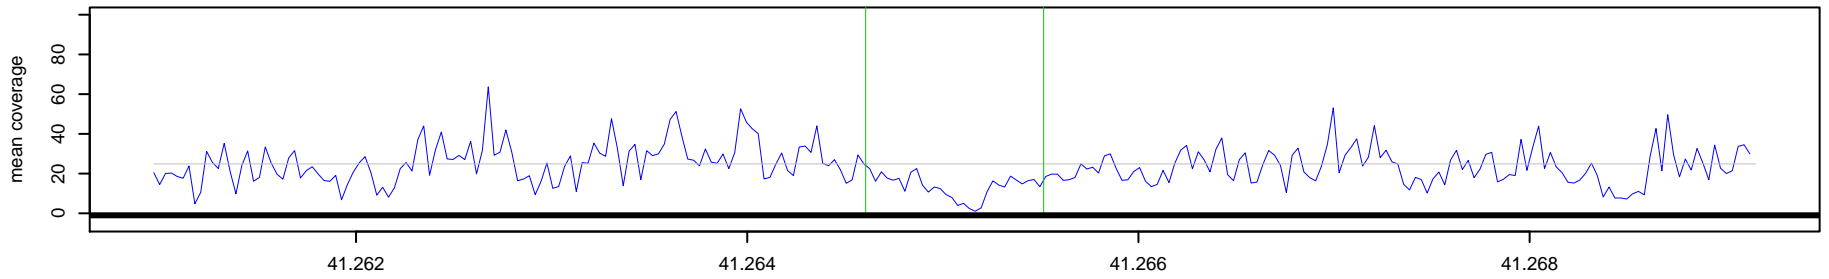

570\_NA10851 Chr 15 : 41264606 - 41265515 , 910 bp (aCGH relative log2ratio= -0.53 )

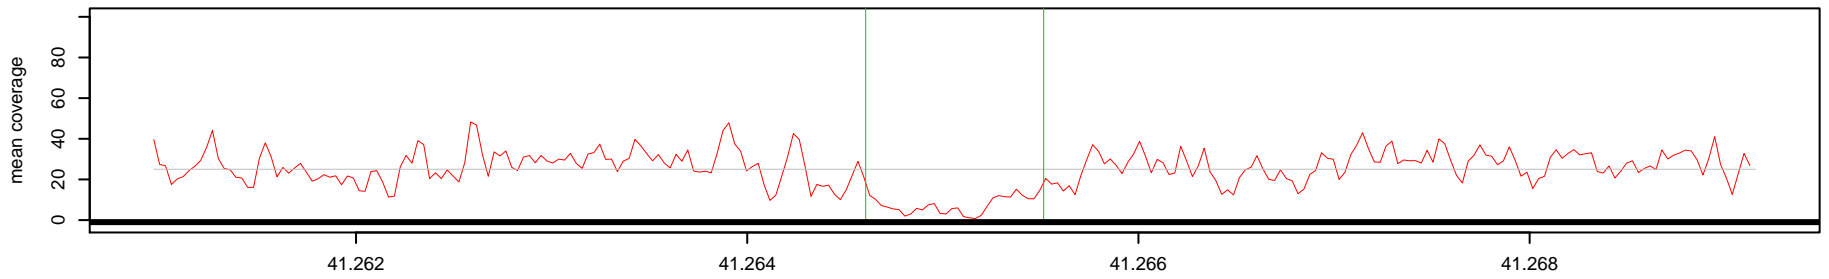

Log2( AK1 read depth / NA10851 read depth)

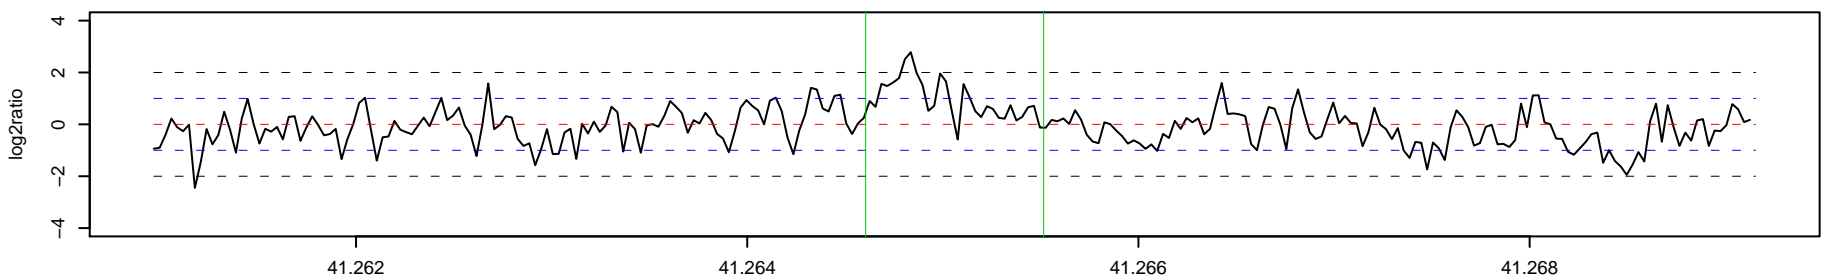

o

571\_AK1 Chr 15 : 41924979 – 41926137 , 1159 bp (aCGH relative log2ratio= 0.68 )

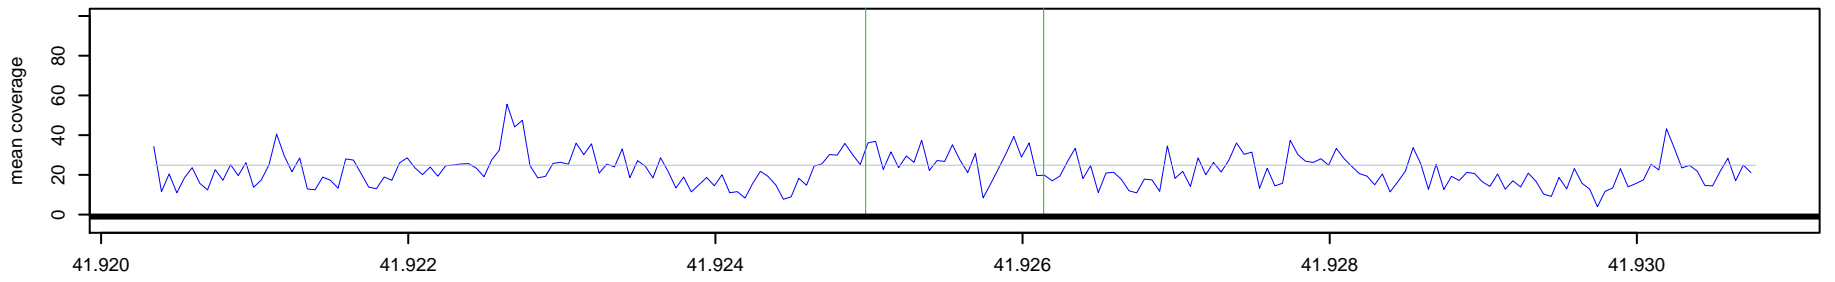

571\_NA10851 Chr 15 : 41924979 – 41926137 , 1159 bp (aCGH relative log2ratio= 0.68 )

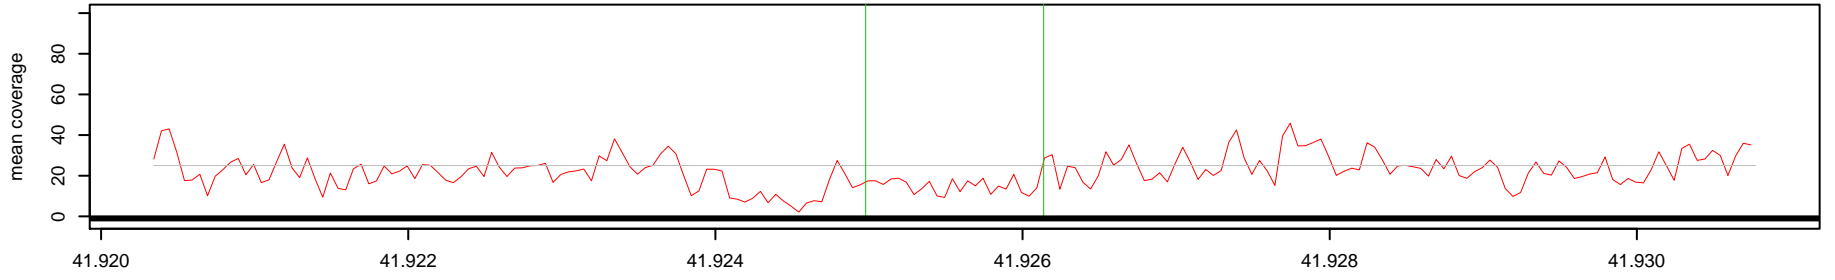

Log2( AK1 read depth / NA10851 read depth)

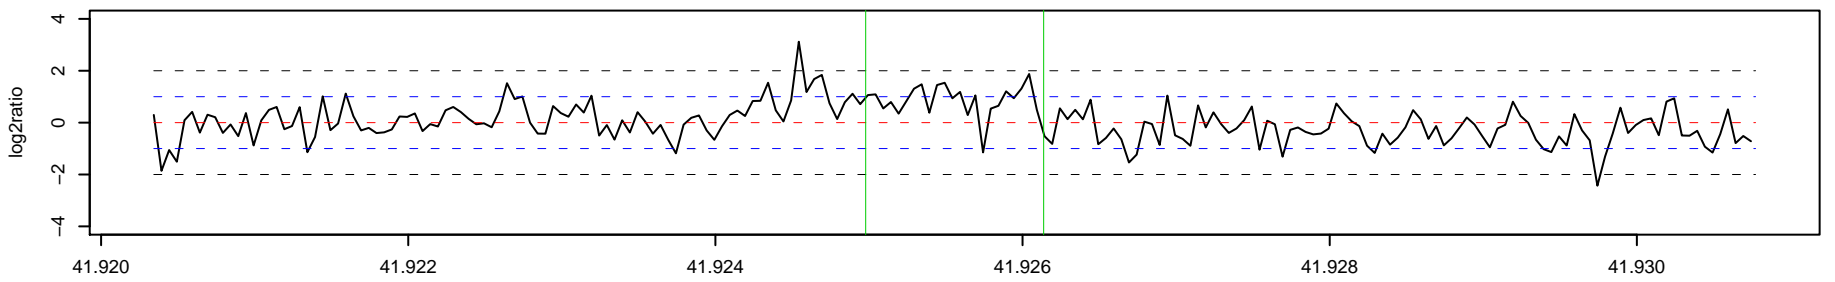

572\_AK1 Chr 15 : 43106124 – 43111243 , 5120 bp (aCGH relative log2ratio= 0.36 )

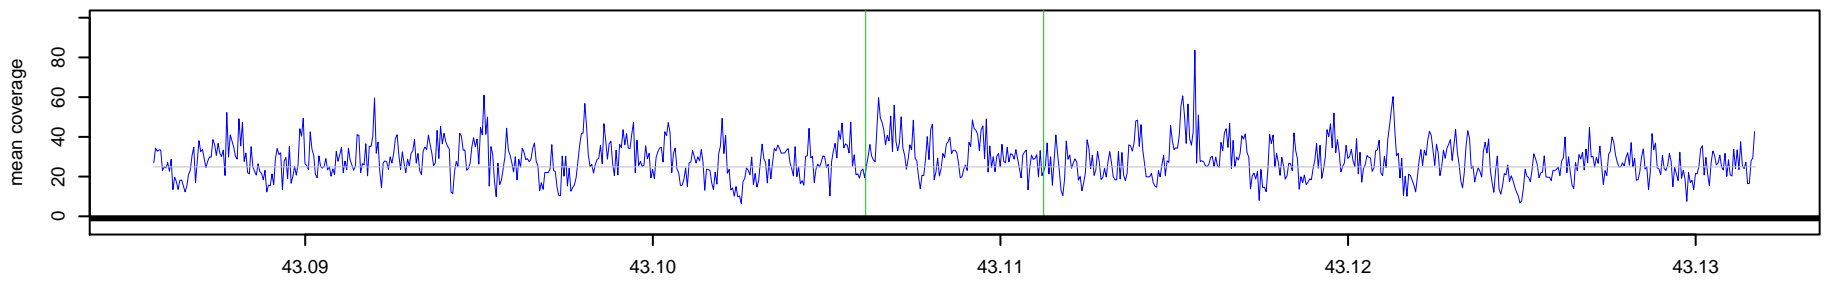

572\_NA10851 Chr 15 : 43106124 – 43111243 , 5120 bp (aCGH relative log2ratio= 0.36 )

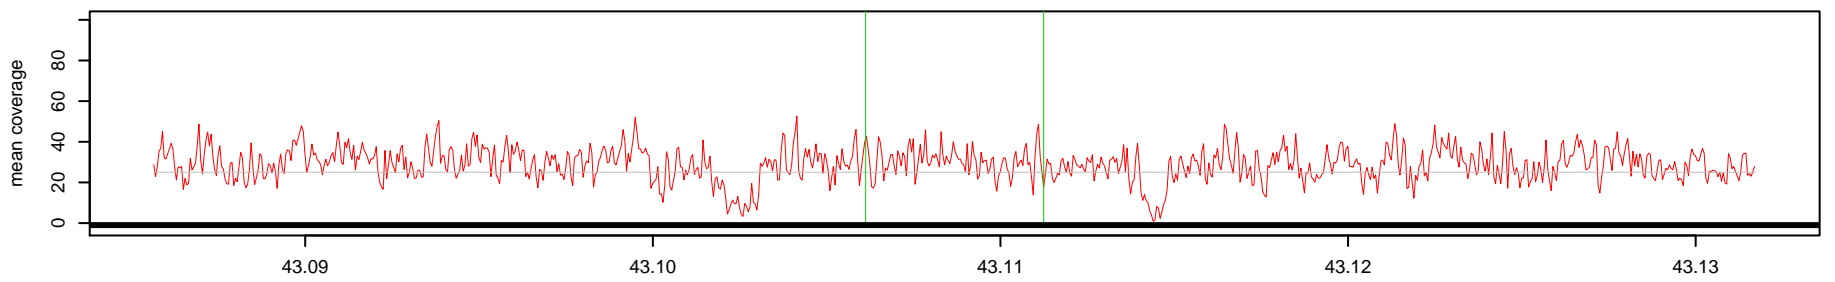

Log2( AK1 read depth / NA10851 read depth)

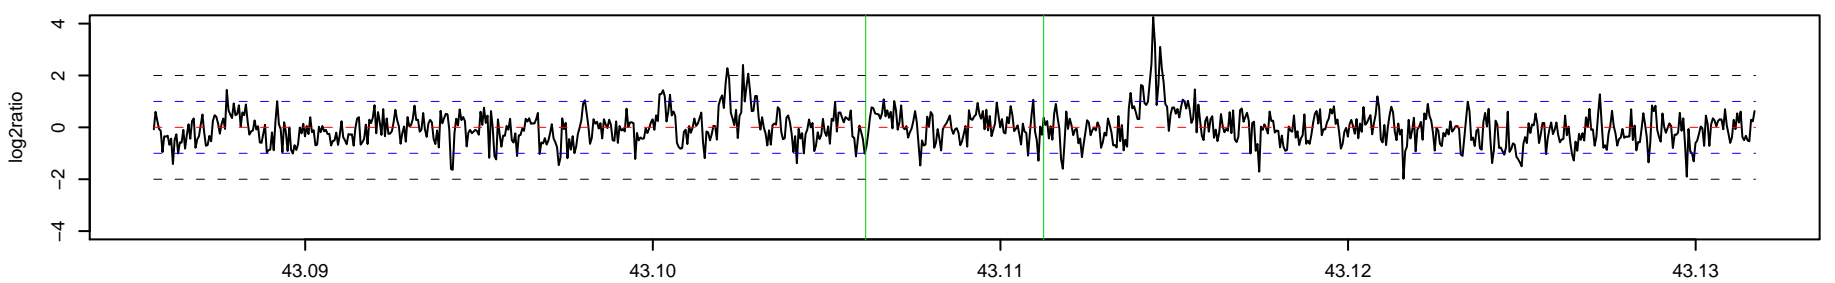

573\_AK1 Chr 15 : 43440793 – 43441234 , 442 bp (aCGH relative log2ratio= 0.37 )

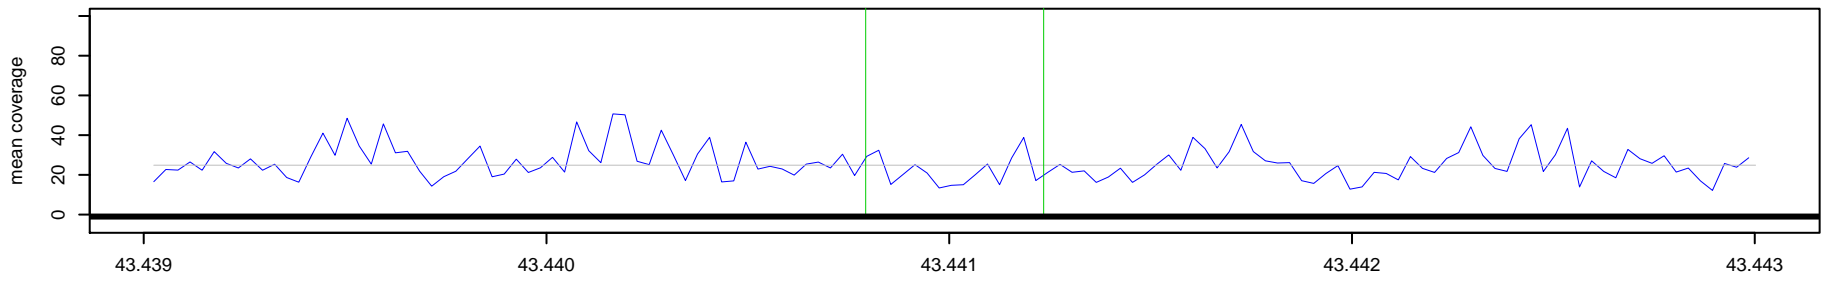

573\_NA10851 Chr 15 : 43440793 – 43441234 , 442 bp (aCGH relative log2ratio= 0.37 )

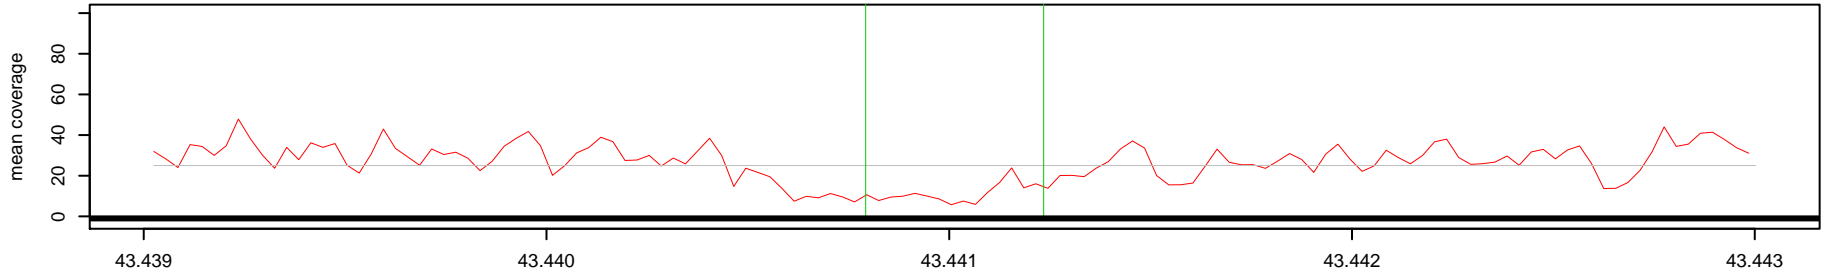

Log2( AK1 read depth / NA10851 read depth)

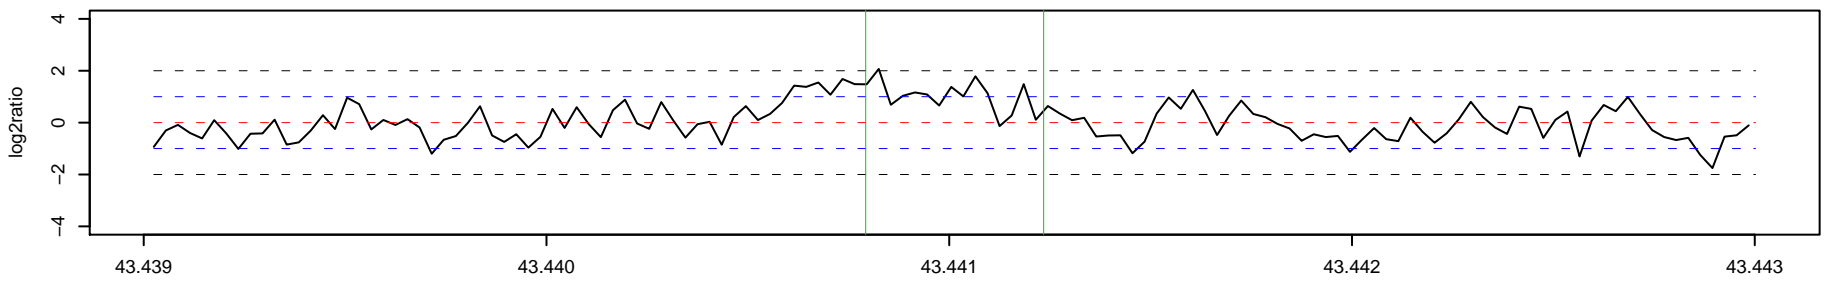

574\_AK1 Chr 15 : 44647821 – 44648397 , 577 bp (aCGH relative log2ratio= 0.81 )

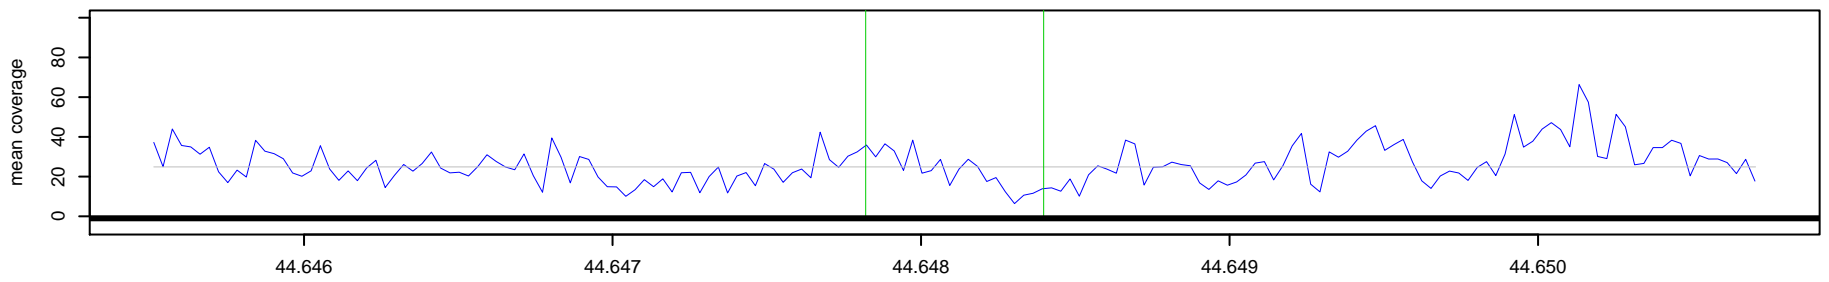

574\_NA10851 Chr 15 : 44647821 – 44648397 , 577 bp (aCGH relative log2ratio= 0.81 )

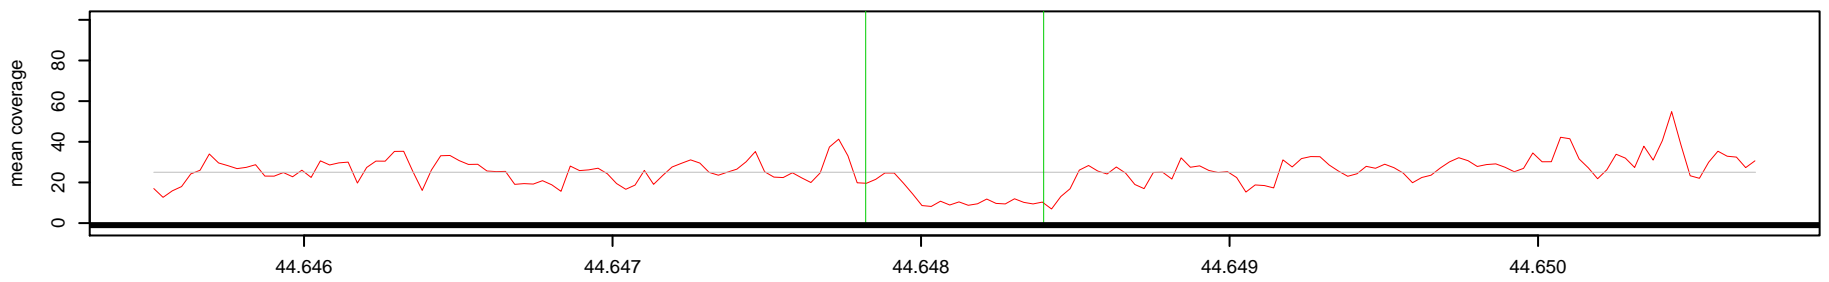

Log2( AK1 read depth / NA10851 read depth)

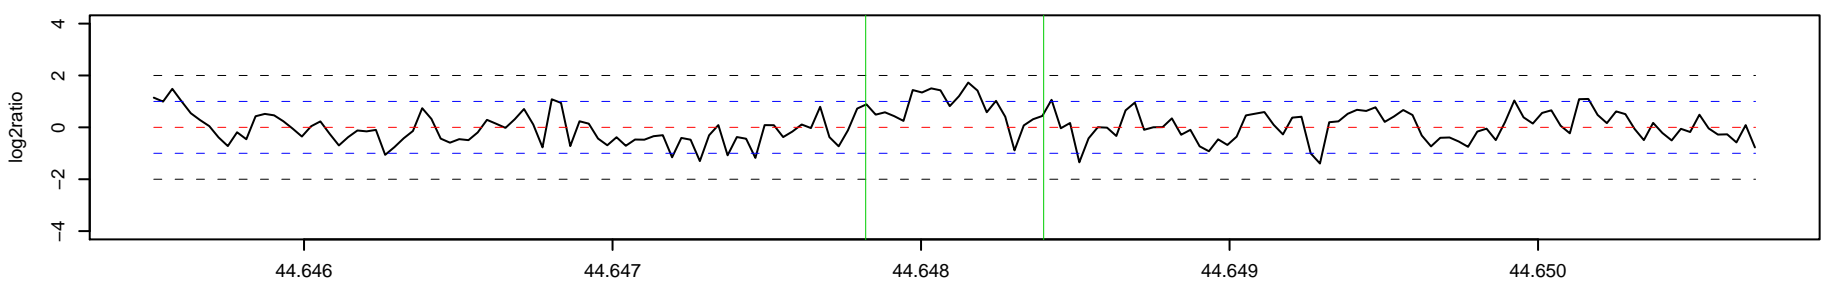

575\_AK1 Chr 15 : 60493358 – 60494512 , 1155 bp (aCGH relative log2ratio= 2.79 )

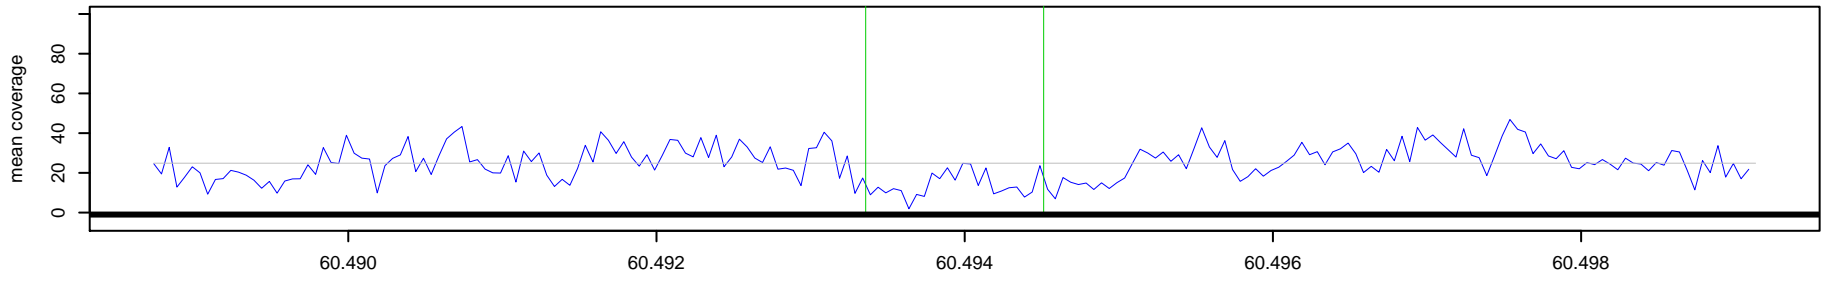

575\_NA10851 Chr 15 : 60493358 – 60494512 , 1155 bp (aCGH relative log2ratio= 2.79 )

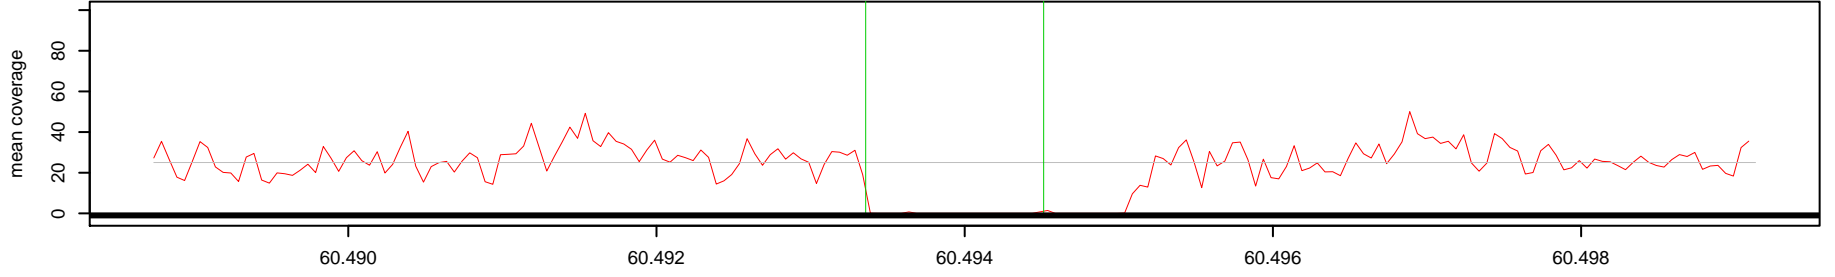

Log2( AK1 read depth / NA10851 read depth)

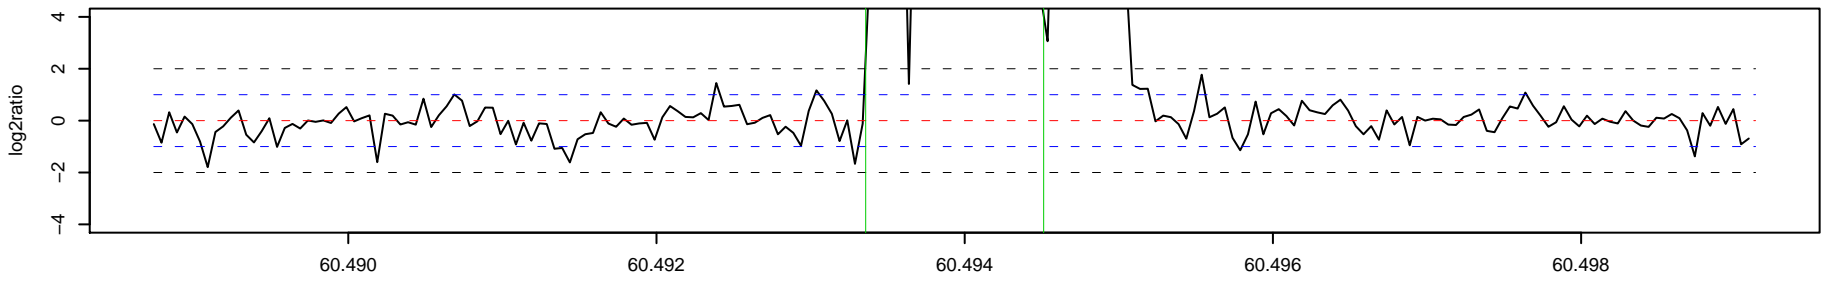

o

o

576\_AK1 Chr 15 : 64664679 – 64665469 , 791 bp (aCGH relative log2ratio= 0.99 )

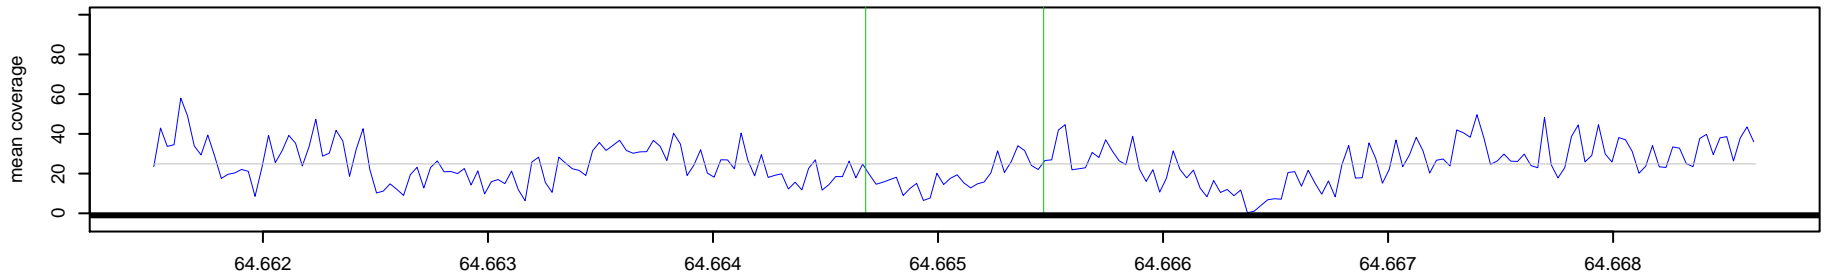

576\_NA10851 Chr 15 : 64664679 – 64665469 , 791 bp (aCGH relative log2ratio= 0.99 )

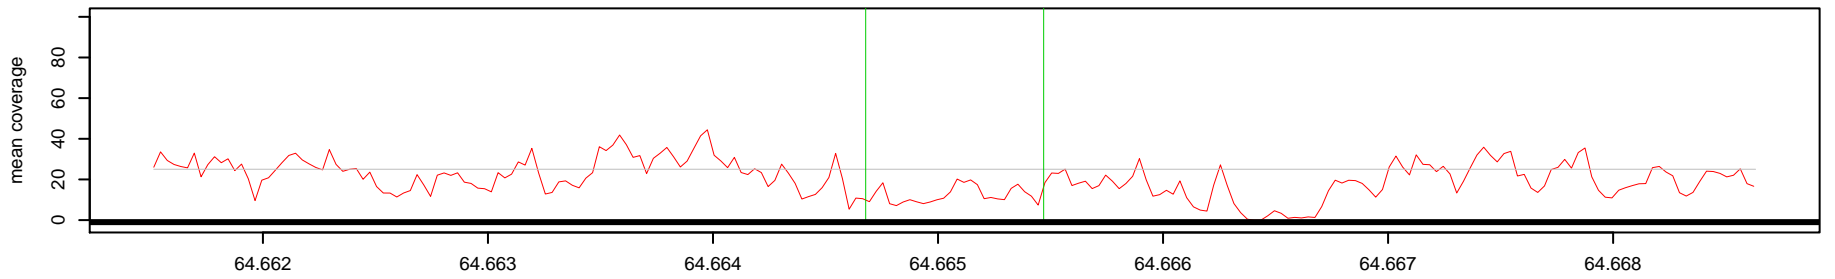

Log2( AK1 read depth / NA10851 read depth)

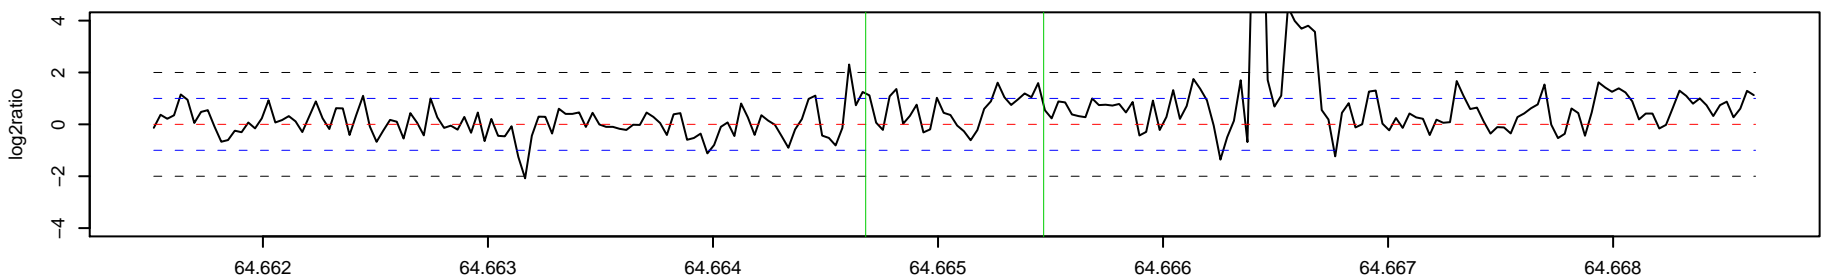

577\_AK1 Chr 15 : 74671426 - 74680690 , 9265 bp (aCGH relative log2ratio= 0.94 )

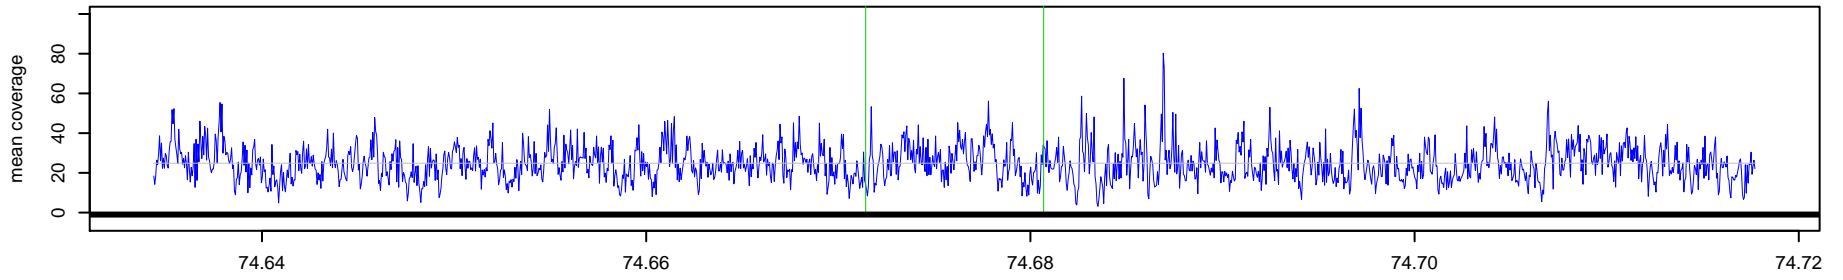

577\_NA10851 Chr 15 : 74671426 - 74680690 , 9265 bp (aCGH relative log2ratio= 0.94 )

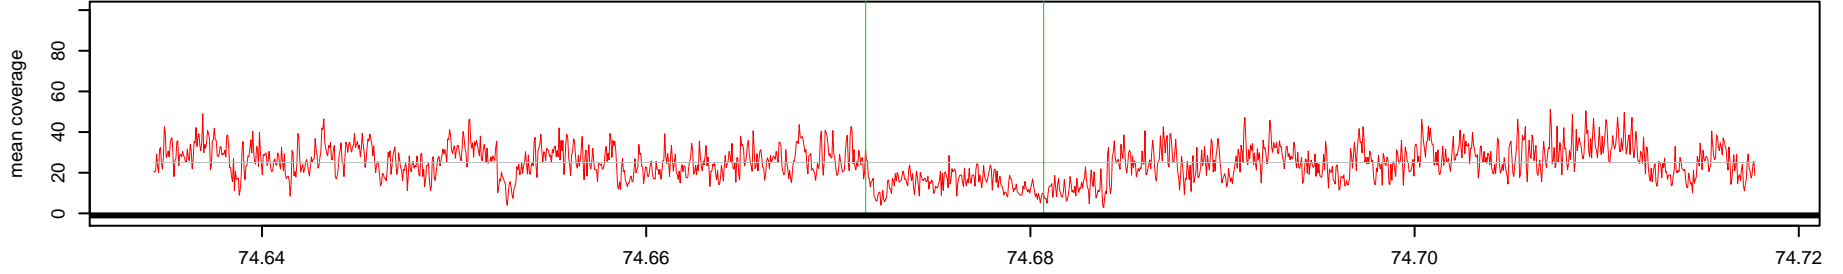

Log2( AK1 read depth / NA10851 read depth)

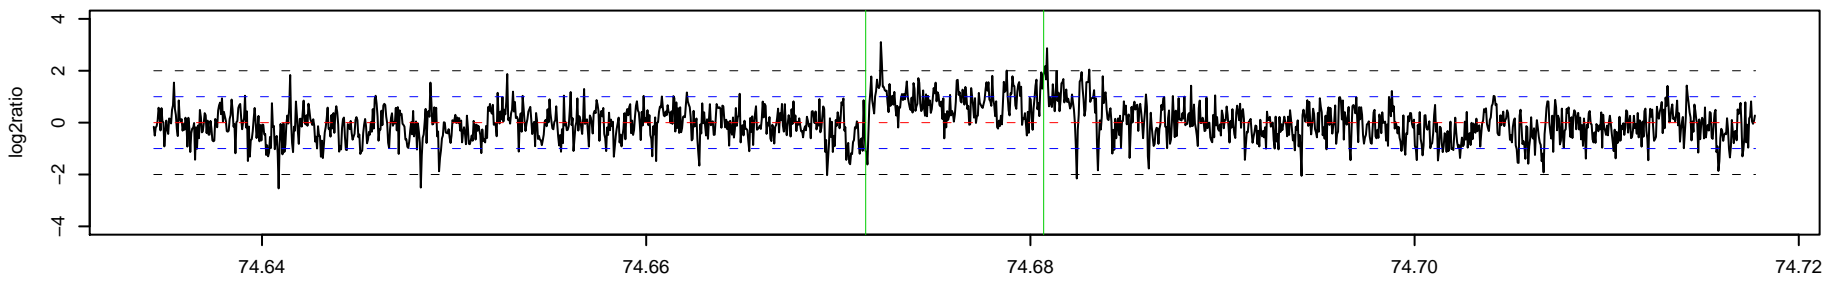

578\_AK1 Chr 15 : 75117682 - 75119910 , 2229 bp (aCGH relative log2ratio= 0.43 )

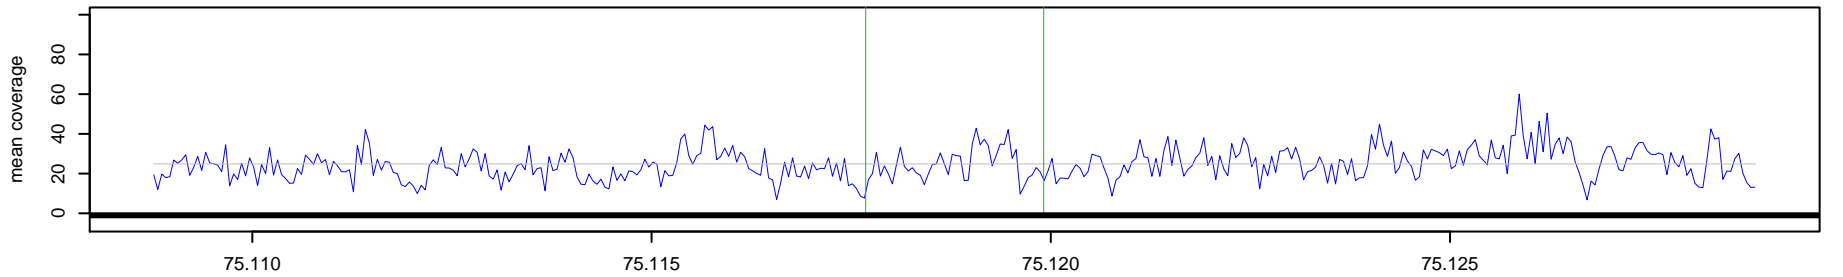

578\_NA10851 Chr 15 : 75117682 - 75119910 , 2229 bp (aCGH relative log2ratio= 0.43 )

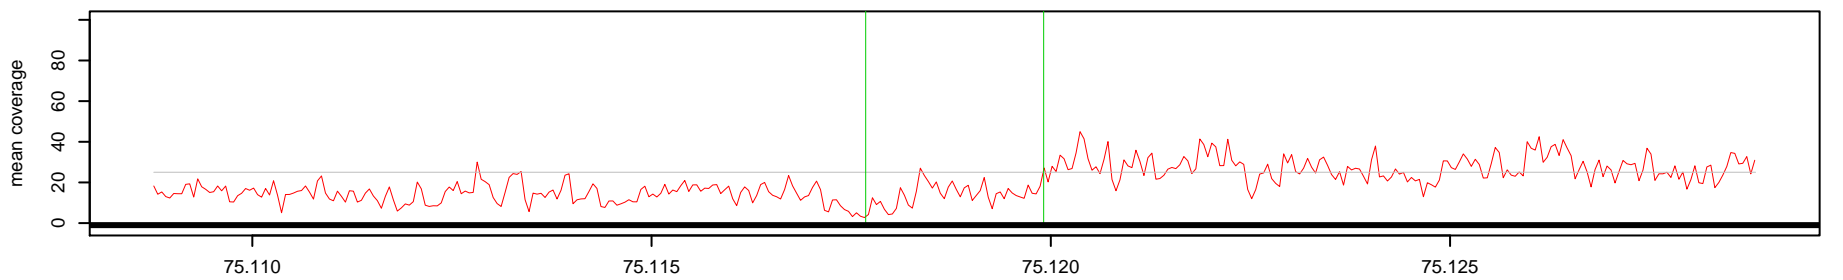

Log2( AK1 read depth / NA10851 read depth)

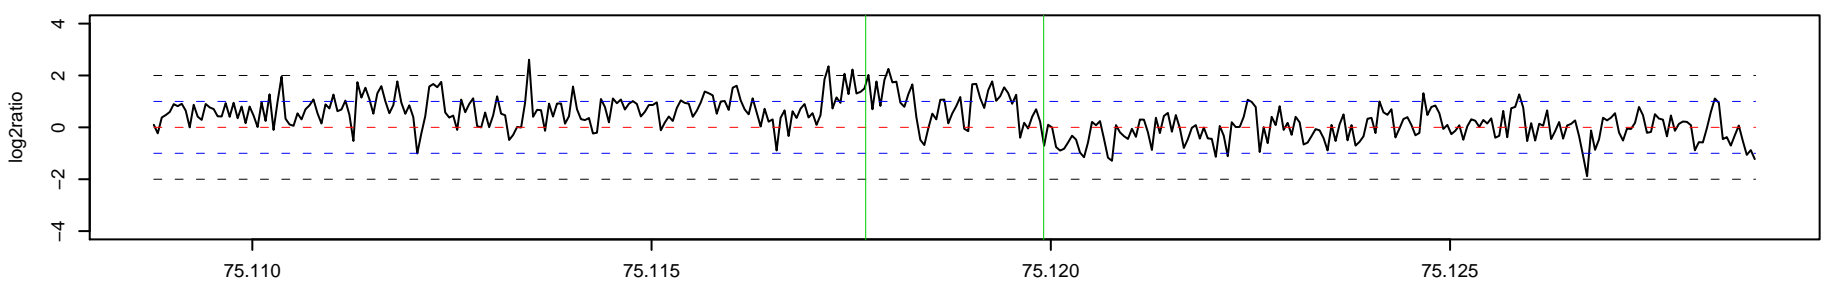

579\_AK1 Chr 15 : 75795773 – 75799379 , 3607 bp (aCGH relative log2ratio= -0.68 )

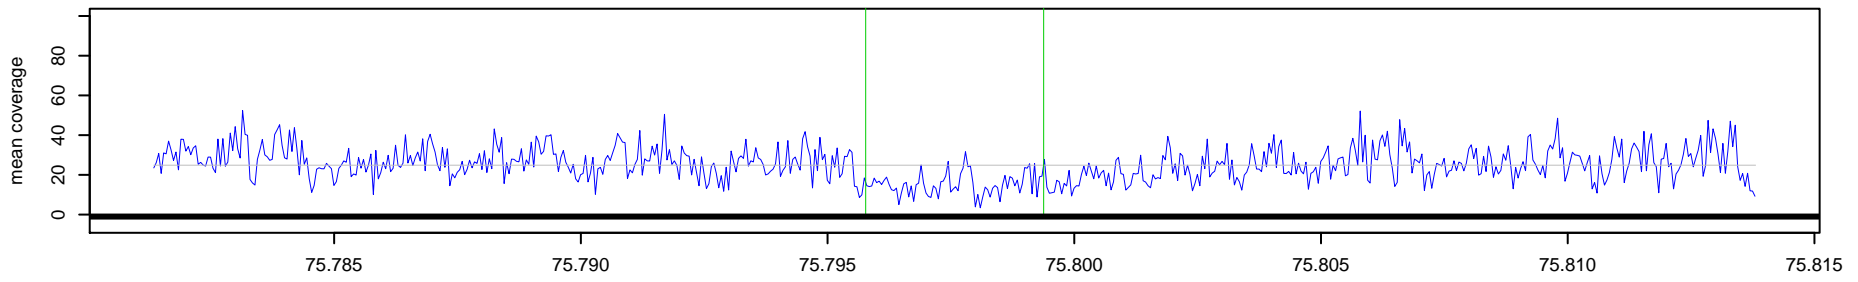

579\_NA10851 Chr 15 : 75795773 – 75799379 , 3607 bp (aCGH relative log2ratio= -0.68 )

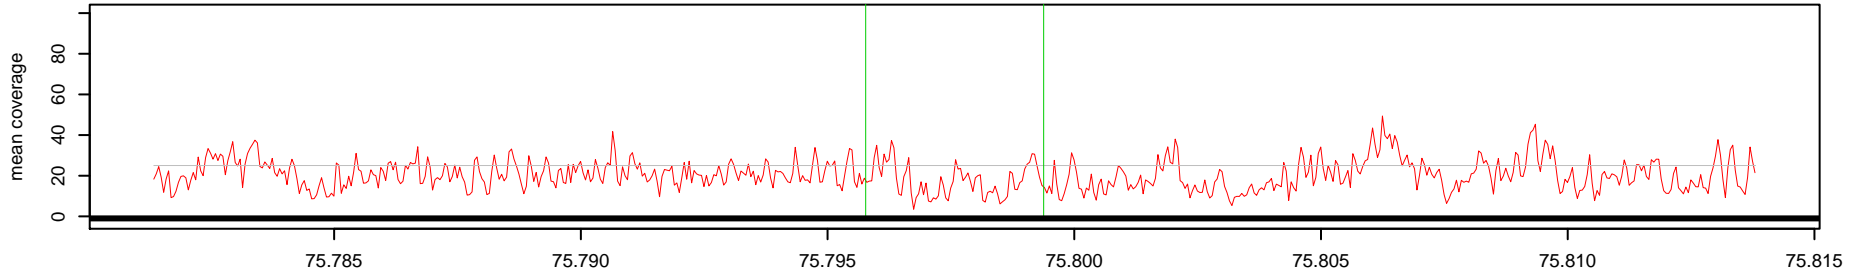

Log2( AK1 read depth / NA10851 read depth)

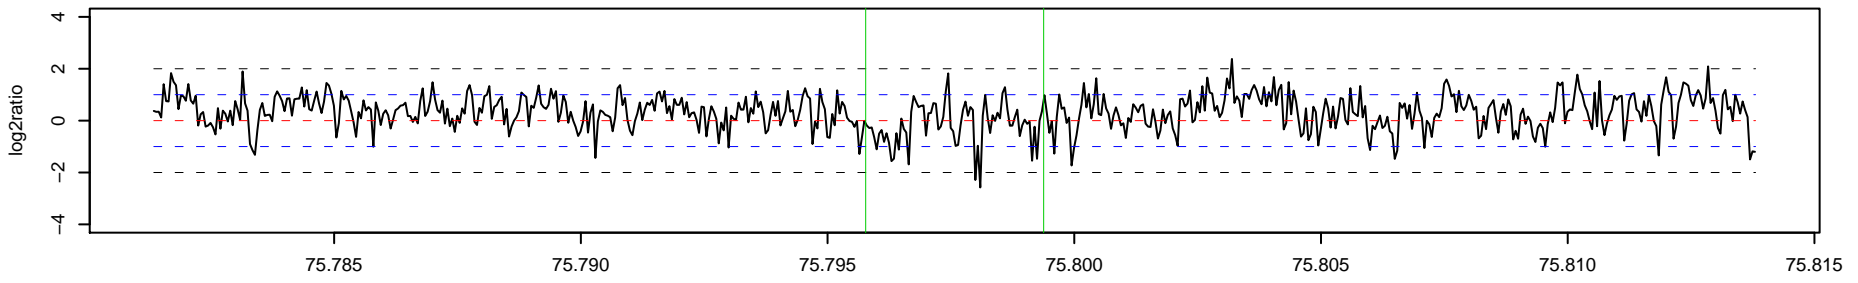

580\_AK1 Chr 15 : 77591649 – 77592638 , 990 bp (aCGH relative log2ratio= -0.76 )

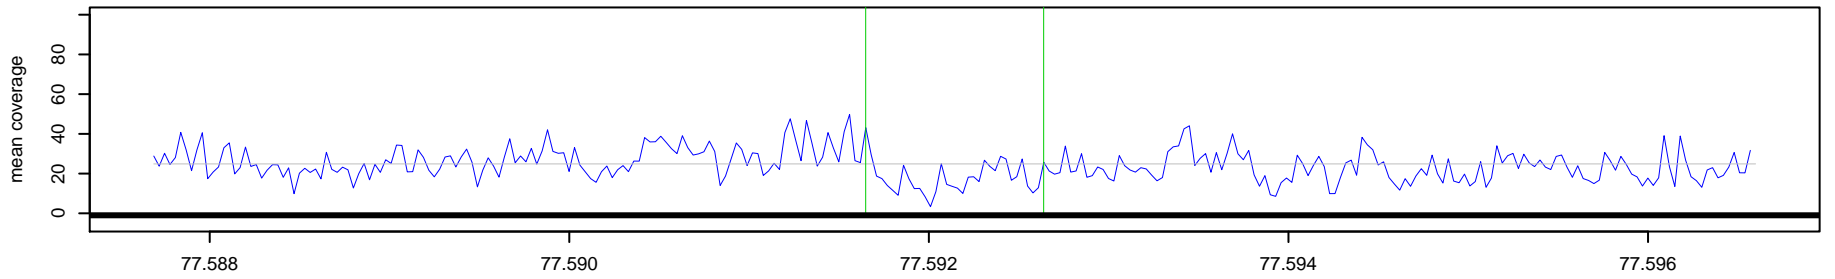

580\_NA10851 Chr 15 : 77591649 – 77592638 , 990 bp (aCGH relative log2ratio= -0.76 )

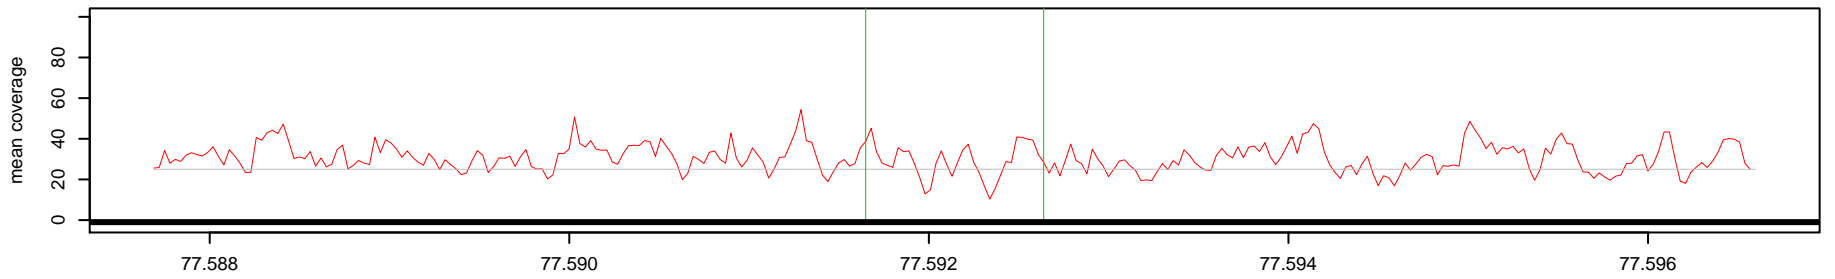

Log2( AK1 read depth / NA10851 read depth)

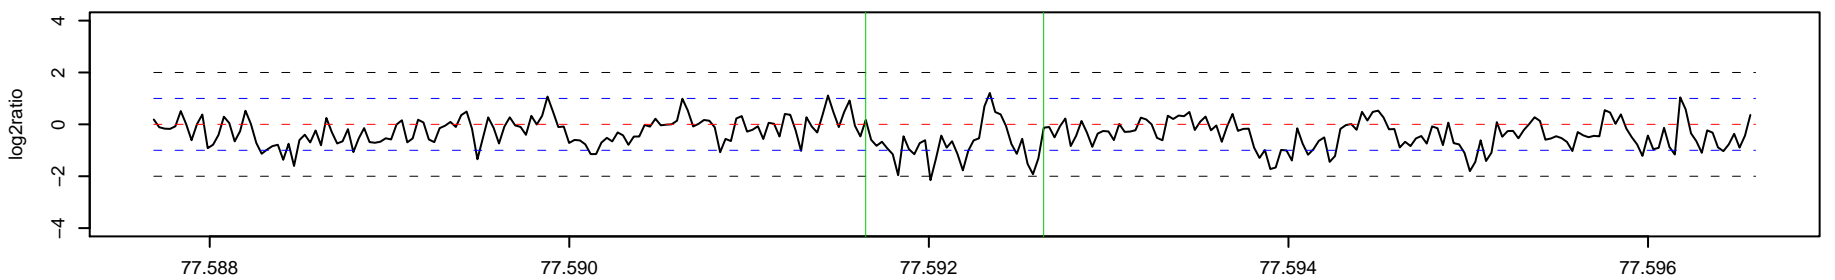

581\_AK1 Chr 15 : 89125380 - 89127080 , 1701 bp (aCGH relative log2ratio= -0.50 )

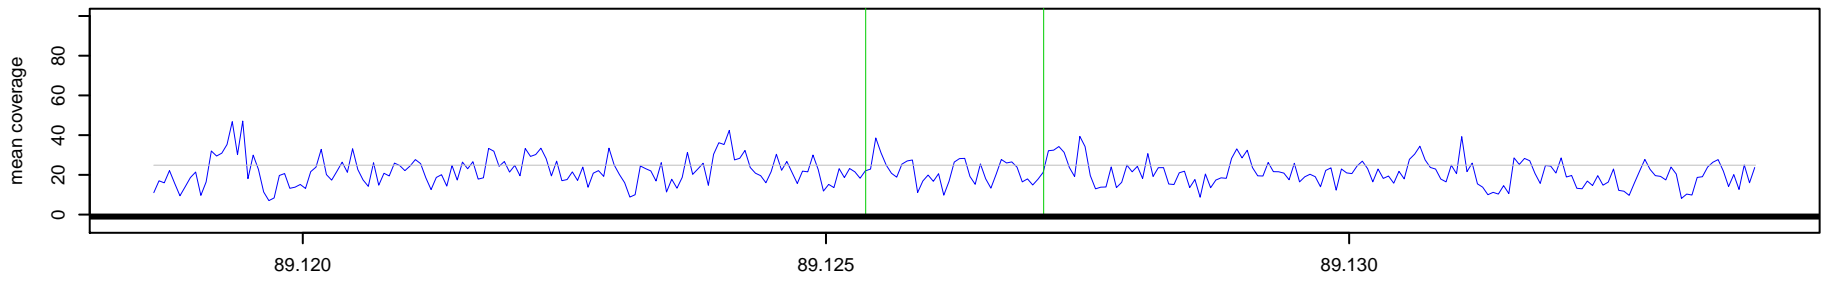

581\_NA10851 Chr 15 : 89125380 - 89127080 , 1701 bp (aCGH relative log2ratio= -0.50 )

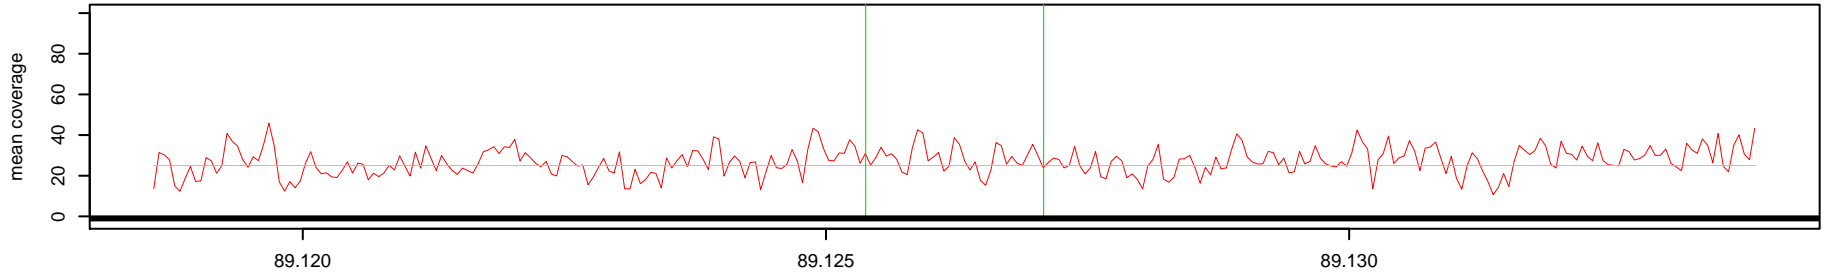

Log2( AK1 read depth / NA10851 read depth)

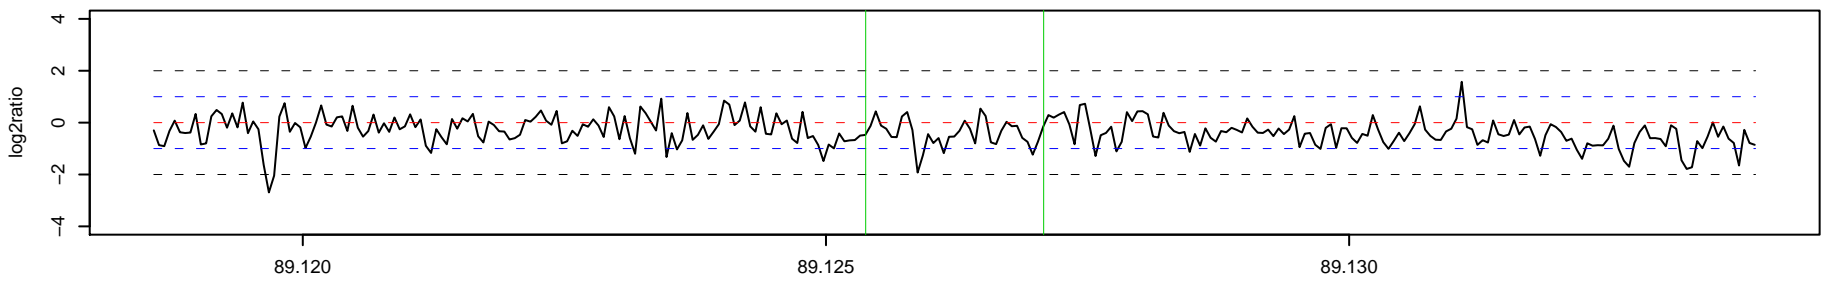

582\_AK1 Chr 15 : 89782571 - 89783192 , 622 bp (aCGH relative log2ratio= 1.32 )

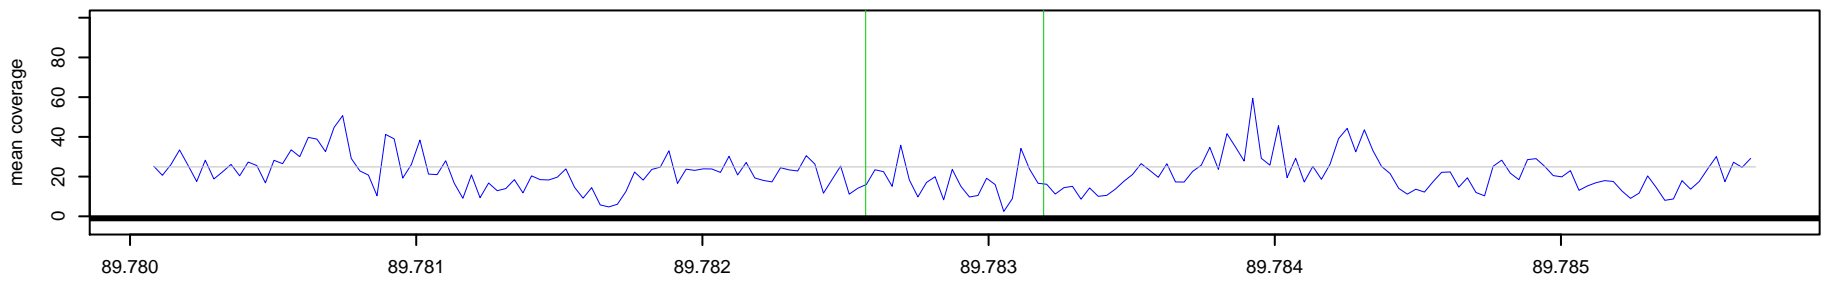

582\_NA10851 Chr 15 : 89782571 - 89783192 , 622 bp (aCGH relative log2ratio= 1.32 )

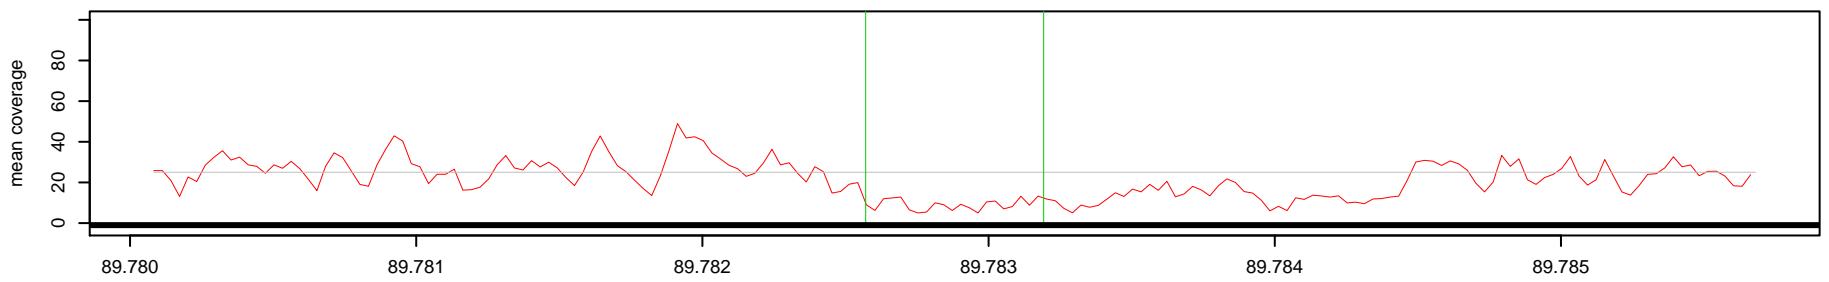

Log2( AK1 read depth / NA10851 read depth)

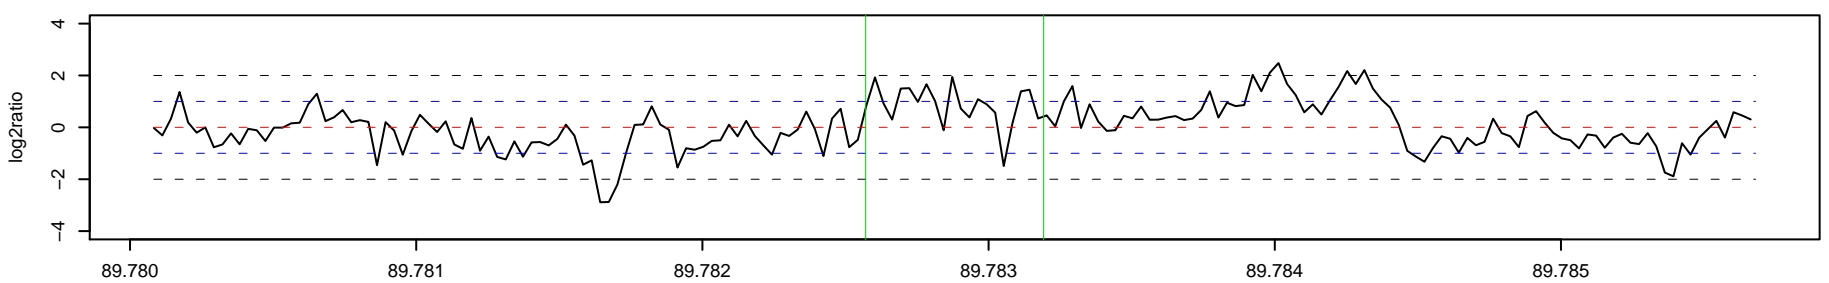

583\_AK1 Chr 15 : 90476373 - 90477778 , 1406 bp (aCGH relative log2ratio= 0.92 )

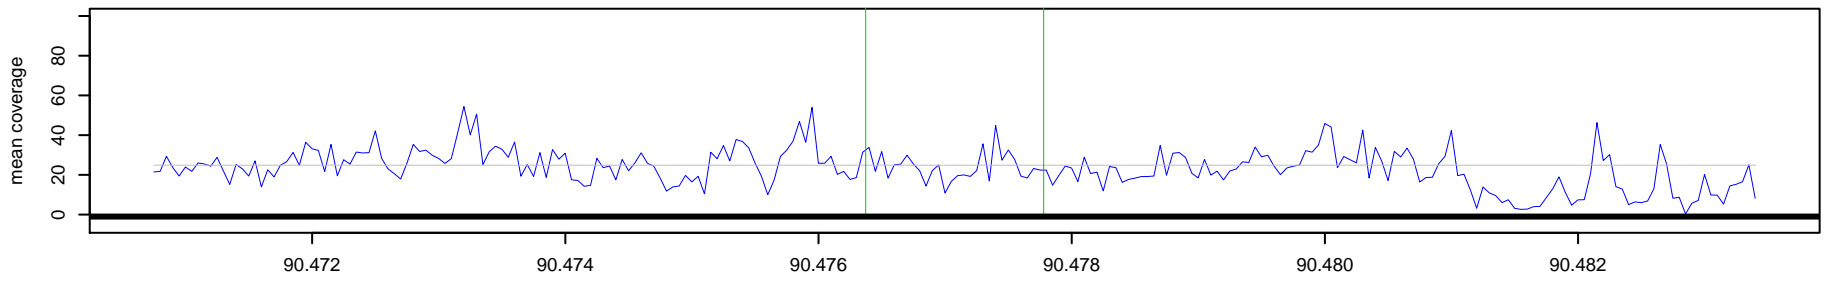

583\_NA10851 Chr 15 : 90476373 - 90477778 , 1406 bp (aCGH relative log2ratio= 0.92 )

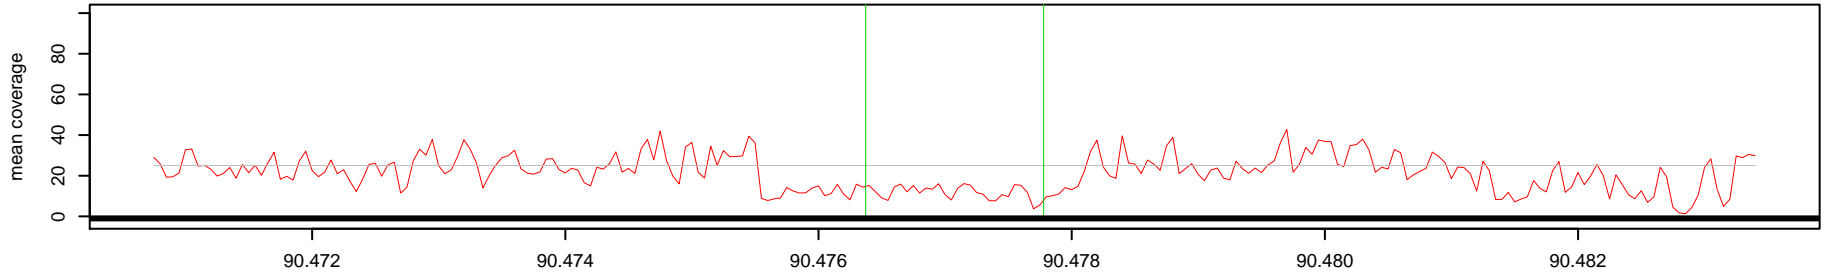

Log2( AK1 read depth / NA10851 read depth)

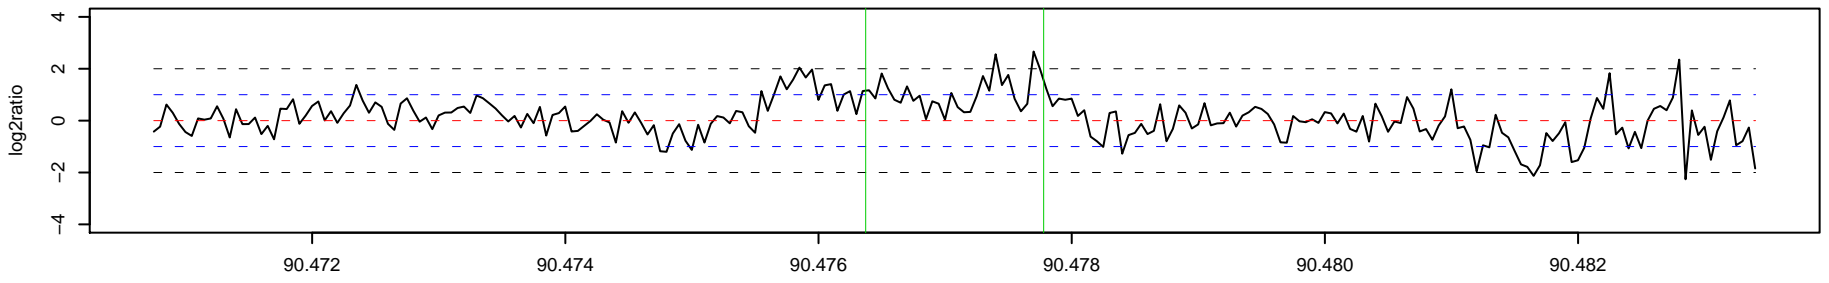

o

o

584\_AK1 Chr 15 : 94681850 - 94682472 , 623 bp (aCGH relative log2ratio= 0.35 )

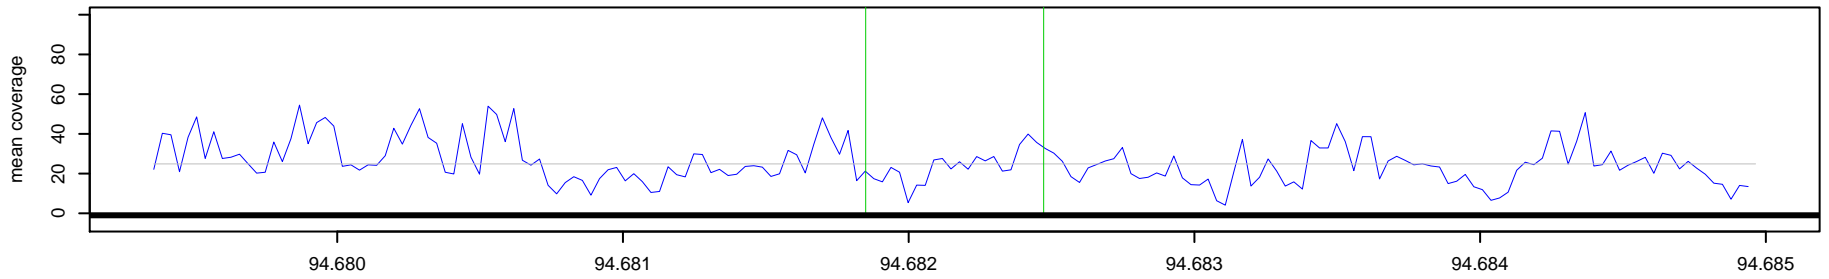

584\_NA10851 Chr 15 : 94681850 - 94682472 , 623 bp (aCGH relative log2ratio= 0.35 )

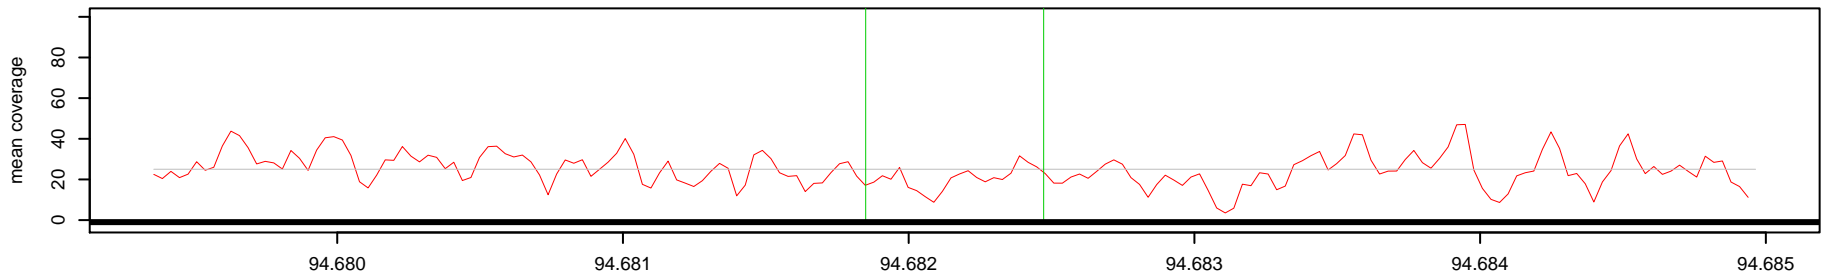

Log2( AK1 read depth / NA10851 read depth)

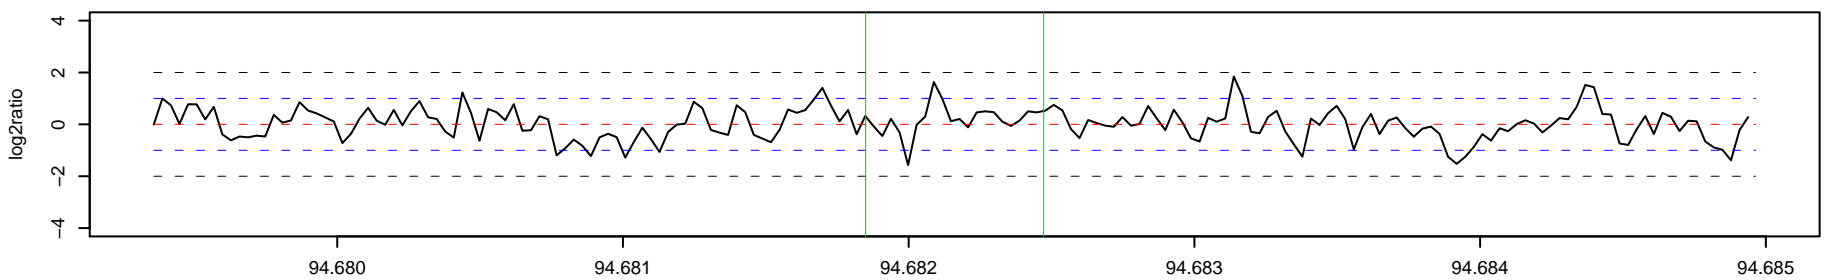



585\_AK1 Chr 15 : 97392091 – 97393150 , 1060 bp (aCGH relative log2ratio= 1.56 )

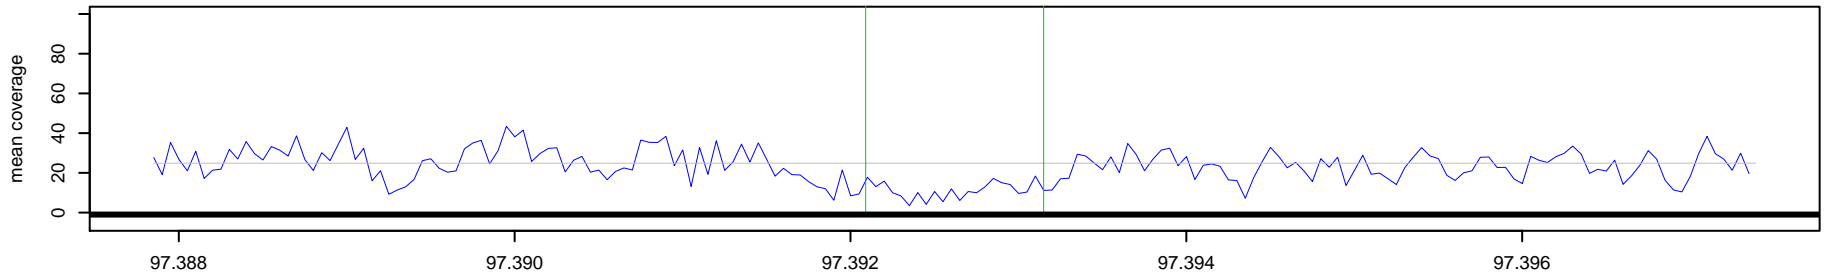

585\_NA10851 Chr 15 : 97392091 – 97393150 , 1060 bp (aCGH relative log2ratio= 1.56 )

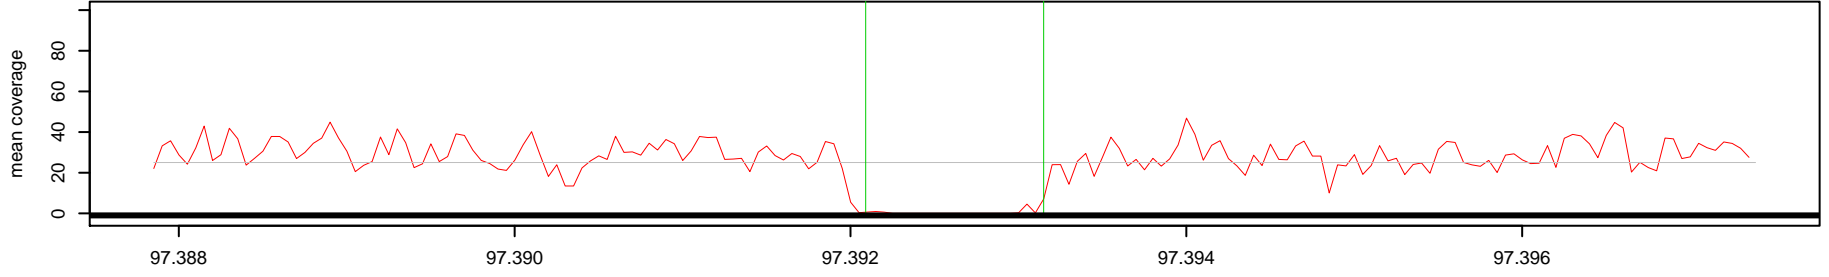

Log2( AK1 read depth / NA10851 read depth)

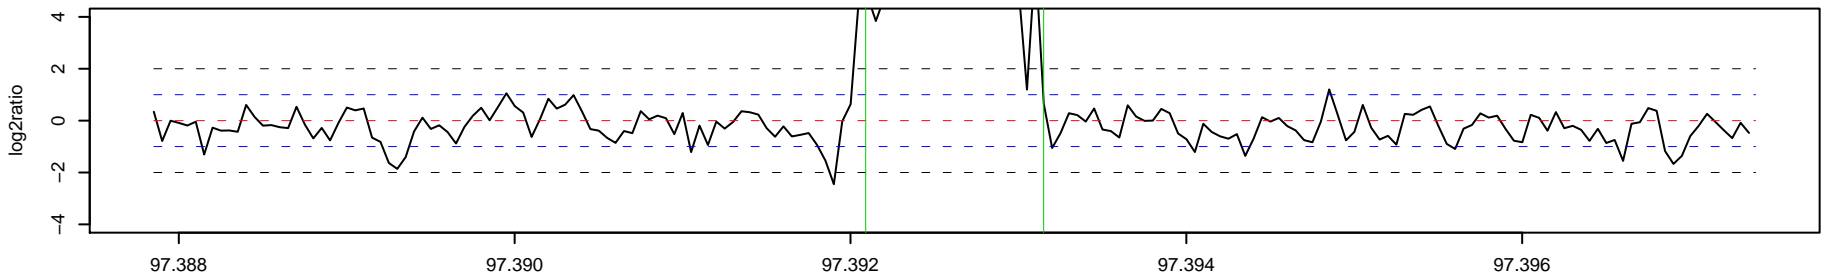

586\_AK1 Chr 15 : 98234148 – 98239654 , 5507 bp (aCGH relative log2ratio= -1.74 )

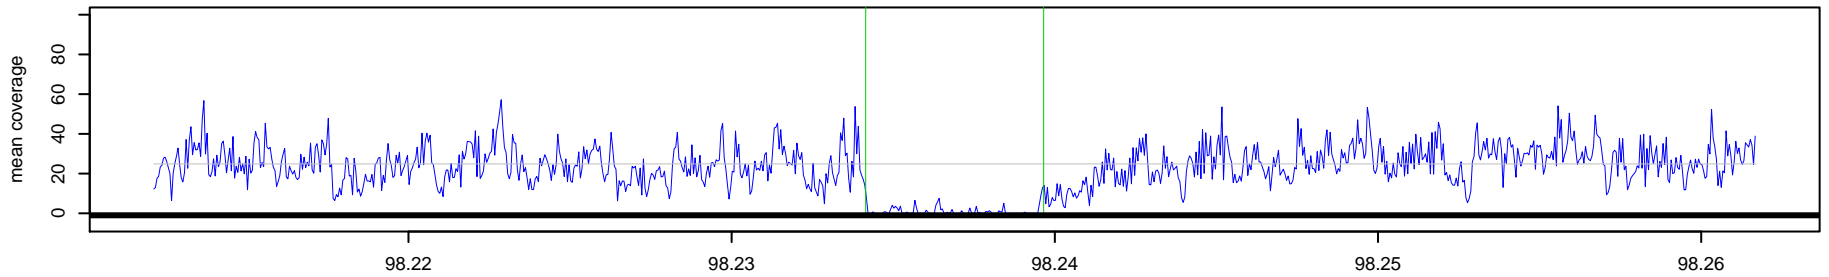

586\_NA10851 Chr 15 : 98234148 – 98239654 , 5507 bp (aCGH relative log2ratio= -1.74 )

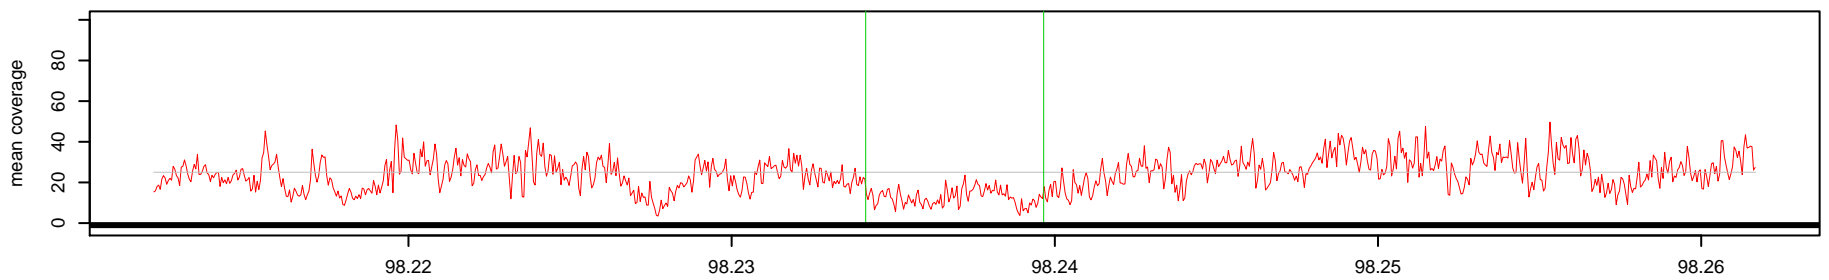

Log2( AK1 read depth / NA10851 read depth)

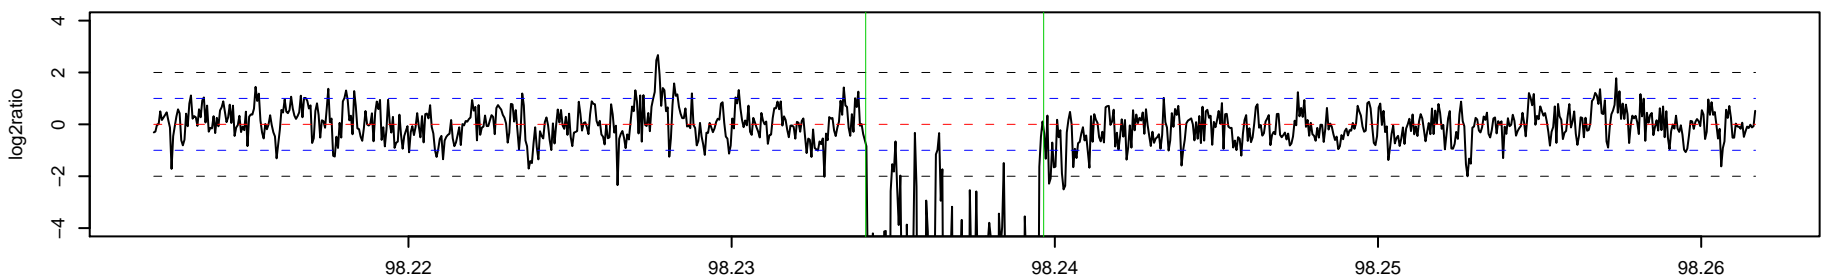

587\_AK1 Chr 15 : 99159208 – 99159863 , 656 bp (aCGH relative log2ratio= -3.57 )

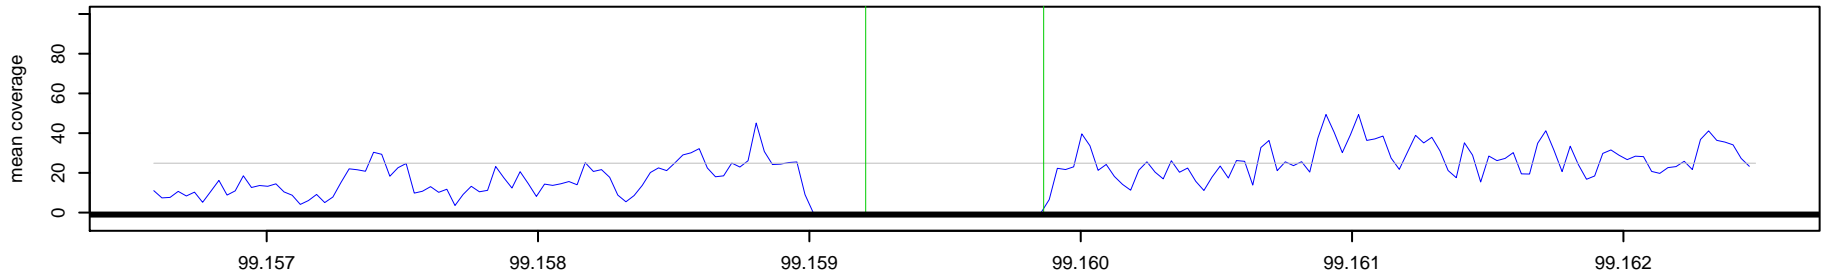

587\_NA10851 Chr 15 : 99159208 – 99159863 , 656 bp (aCGH relative log2ratio= -3.57 )

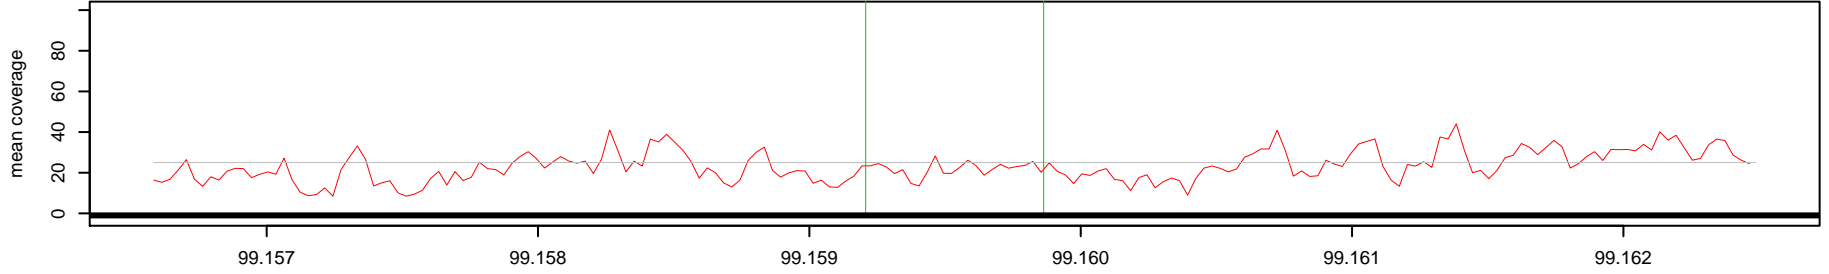

Log2( AK1 read depth / NA10851 read depth)

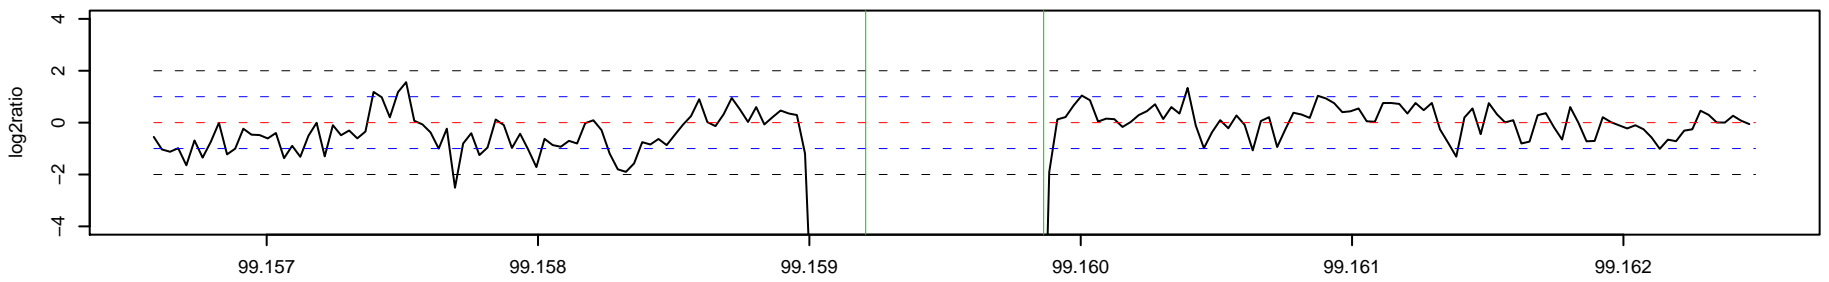

588\_AK1 Chr 16 : 2638330 – 2639998 , 1669 bp (aCGH relative log2ratio= -0.90 )

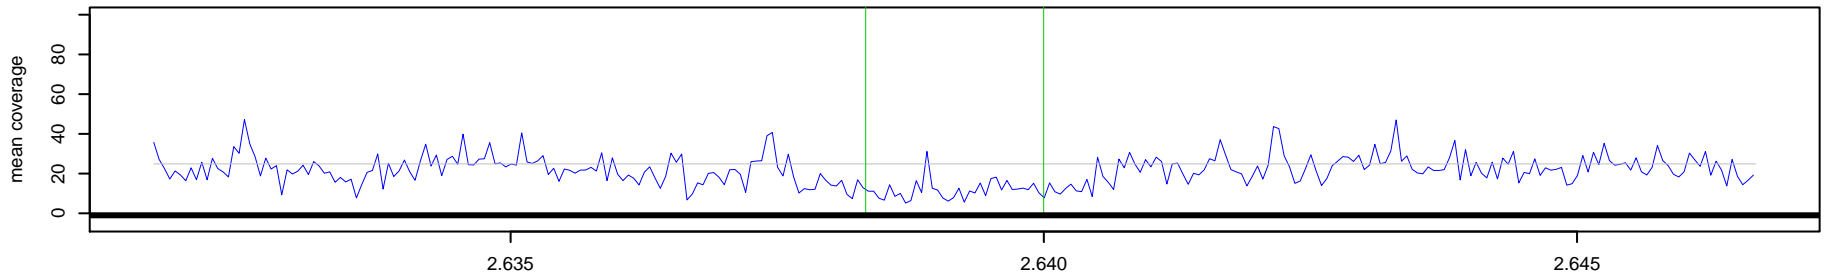

588\_NA10851 Chr 16 : 2638330 – 2639998 , 1669 bp (aCGH relative log2ratio= -0.90 )

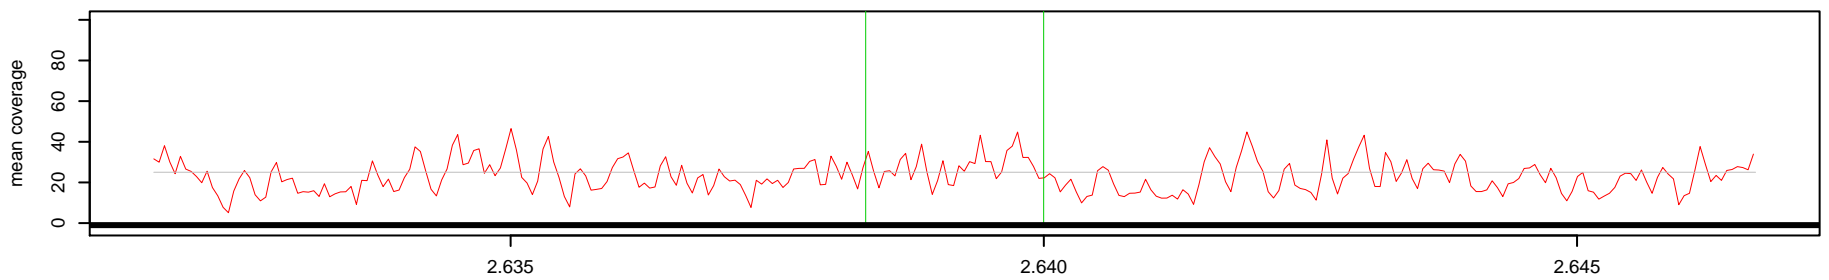

Log2( AK1 read depth / NA10851 read depth)

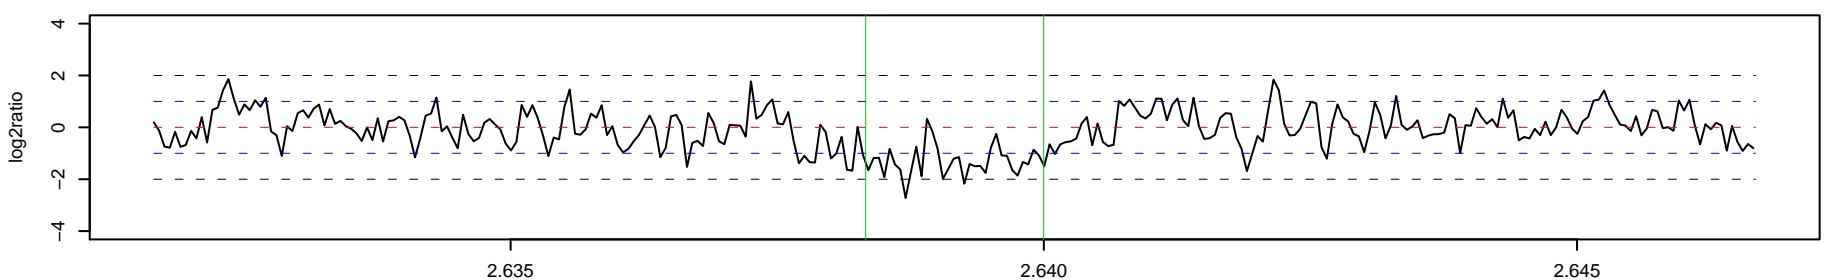

589\_AK1 Chr 16 : 13201941 – 13204475 , 2535 bp (aCGH relative log2ratio= 0.57 )

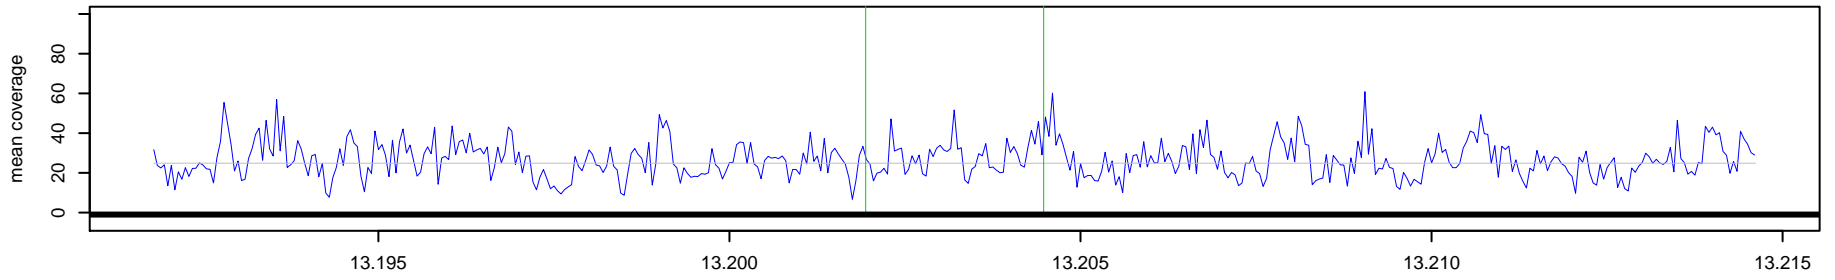

589\_NA10851 Chr 16 : 13201941 – 13204475 , 2535 bp (aCGH relative log2ratio= 0.57 )

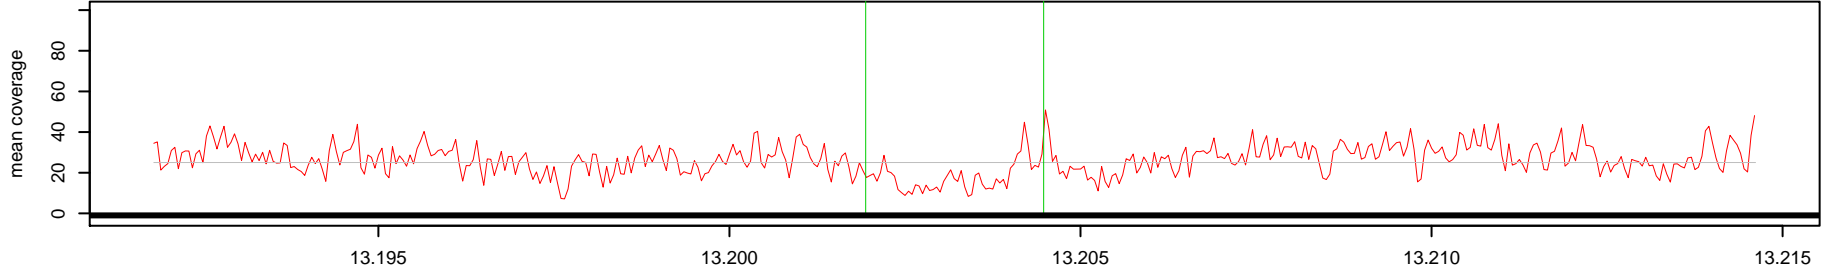

Log2( AK1 read depth / NA10851 read depth)

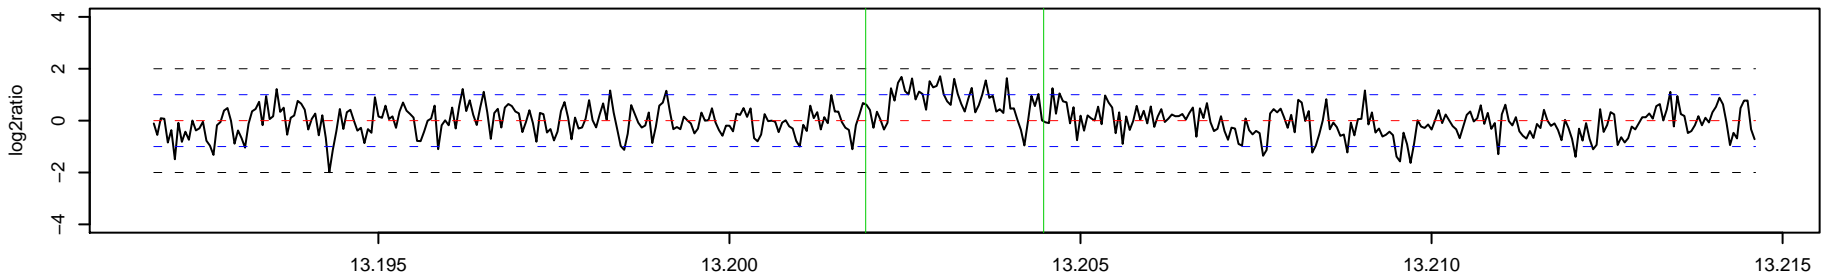

590\_AK1 Chr 16 : 14955977 – 15030356 , 74380 bp (aCGH relative log2ratio= -0.77 )

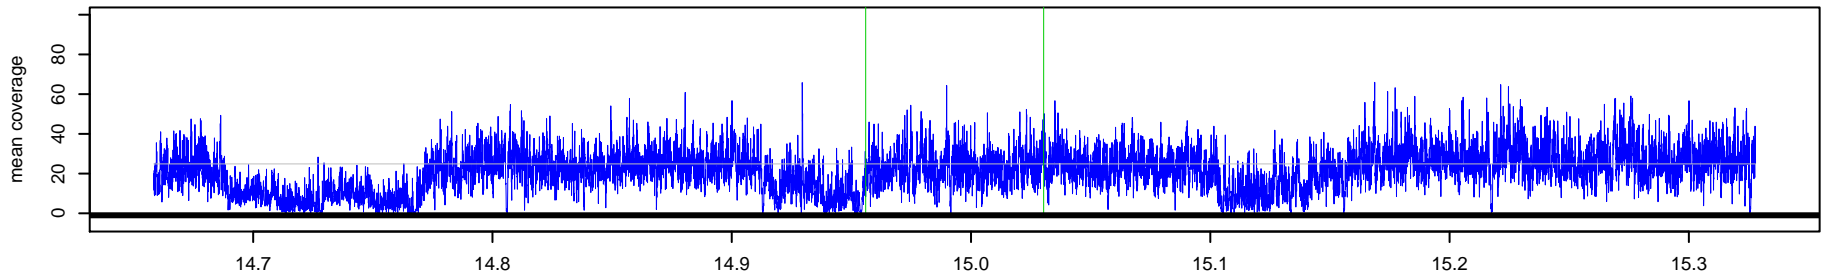

590\_NA10851 Chr 16 : 14955977 – 15030356 , 74380 bp (aCGH relative log2ratio= -0.77 )

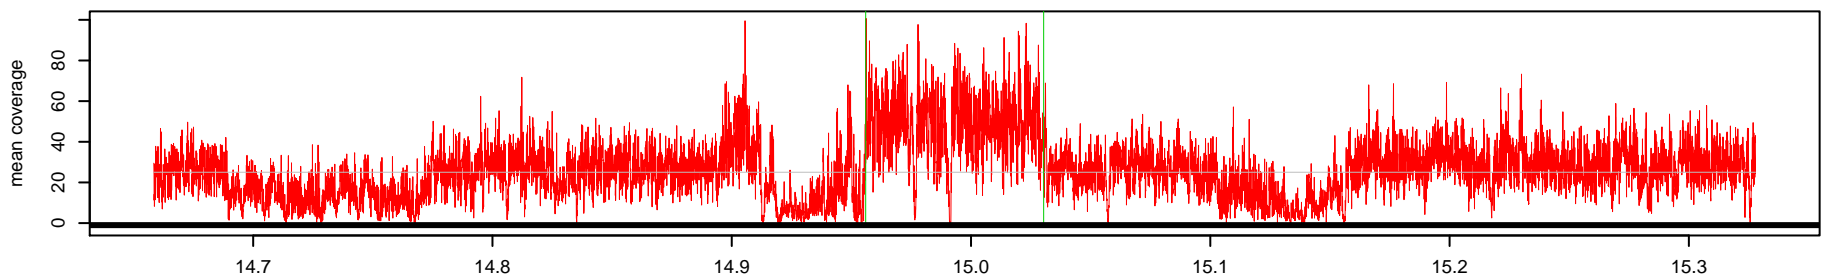

Log2( AK1 read depth / NA10851 read depth)

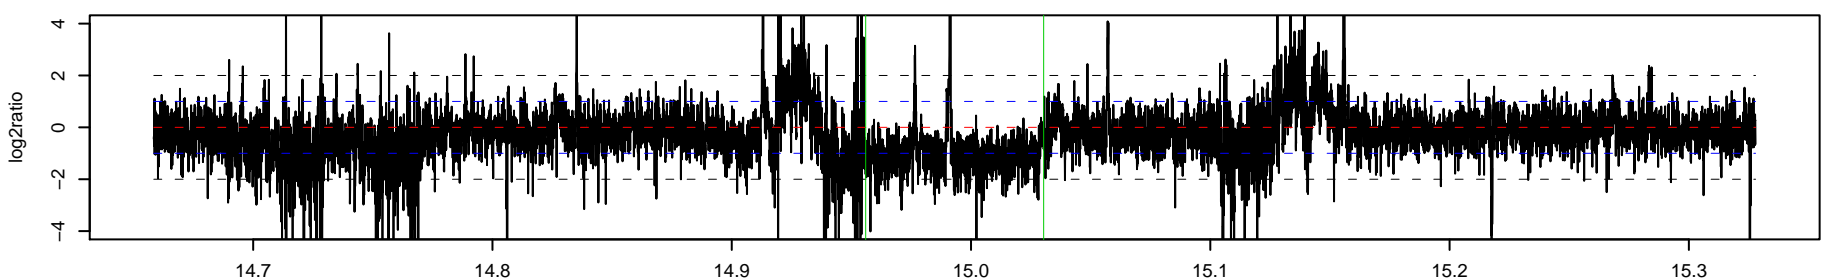

591 \_ AK1 Chr 16 : 16634051 - 16638558 , 4508 bp (aCGH relative log2ratio= 1.10 )

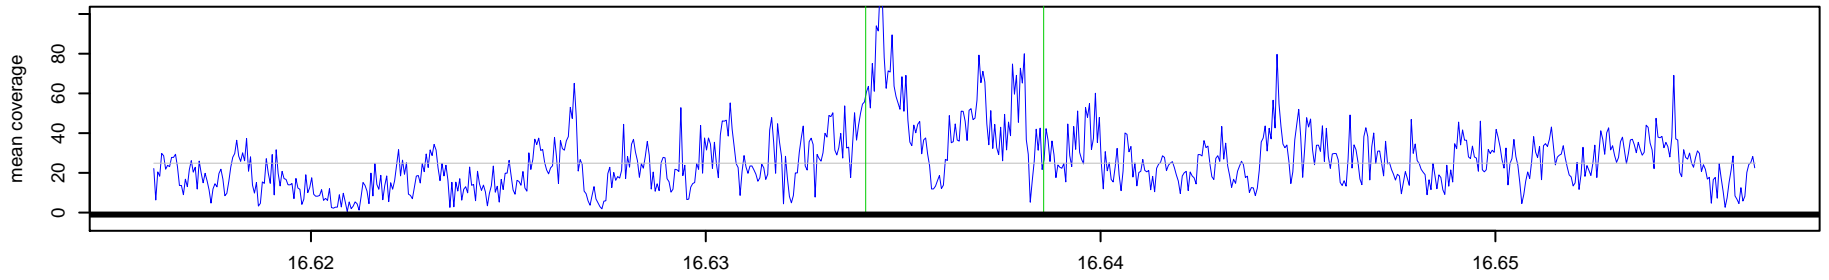

591 \_ NA10851 Chr 16 : 16634051 - 16638558 , 4508 bp (aCGH relative log2ratio= 1.10 )

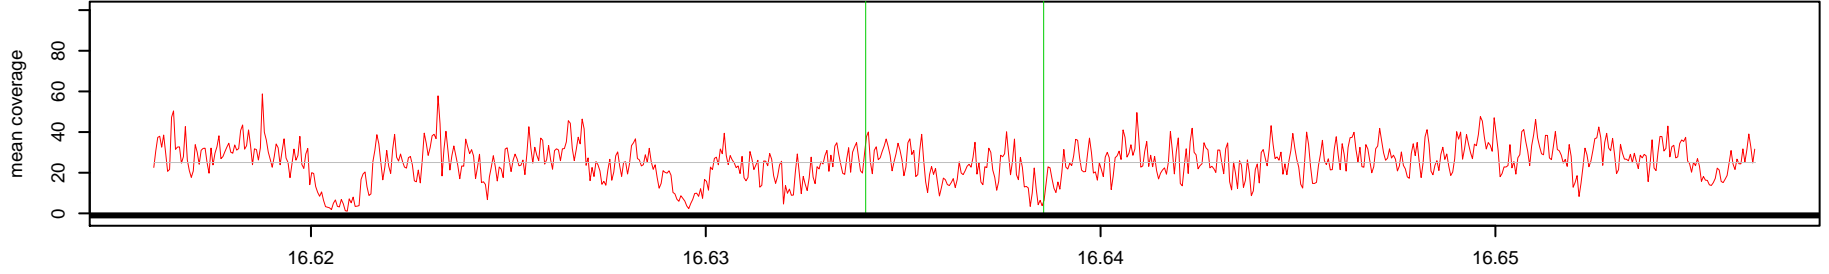

Log2( AK1 read depth / NA10851 read depth)

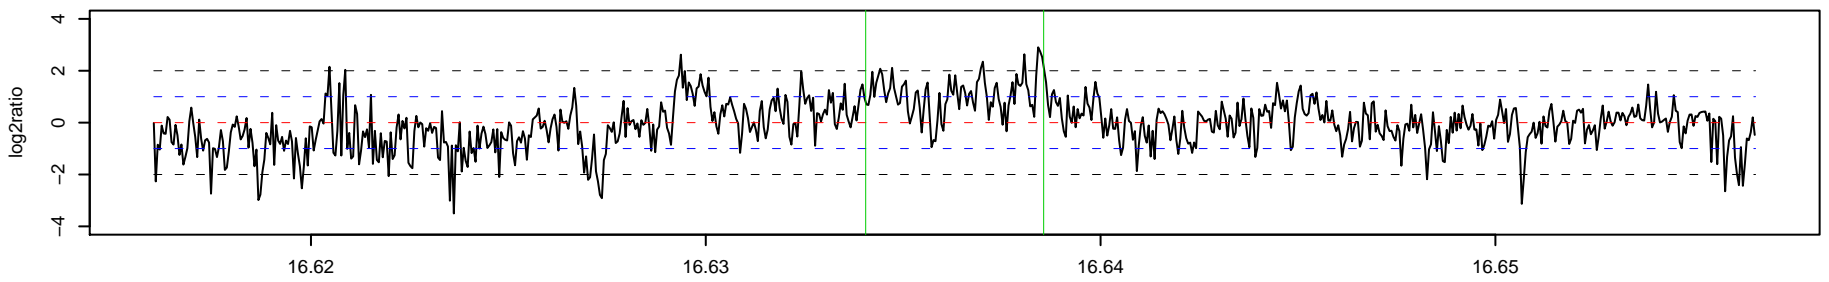

592 \_ AK1 Chr 16 : 21446418 - 21501273 , 54856 bp (aCGH relative log2ratio= 0.41 )

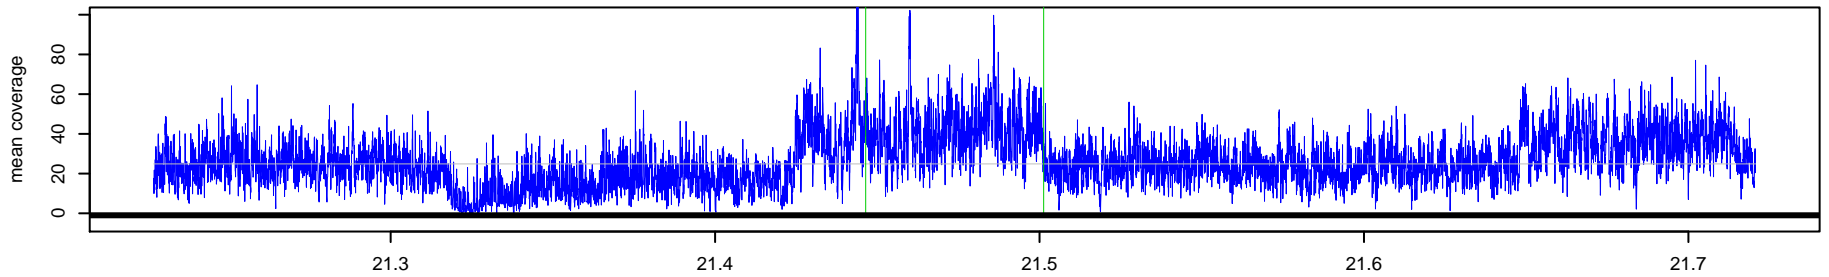

592 \_ NA10851 Chr 16 : 21446418 - 21501273 , 54856 bp (aCGH relative log2ratio= 0.41 )

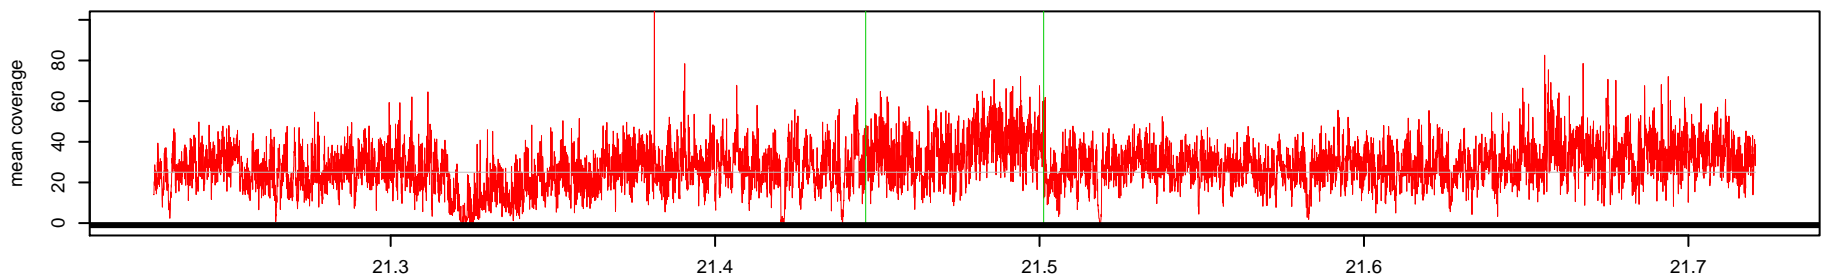

Log2( AK1 read depth / NA10851 read depth)

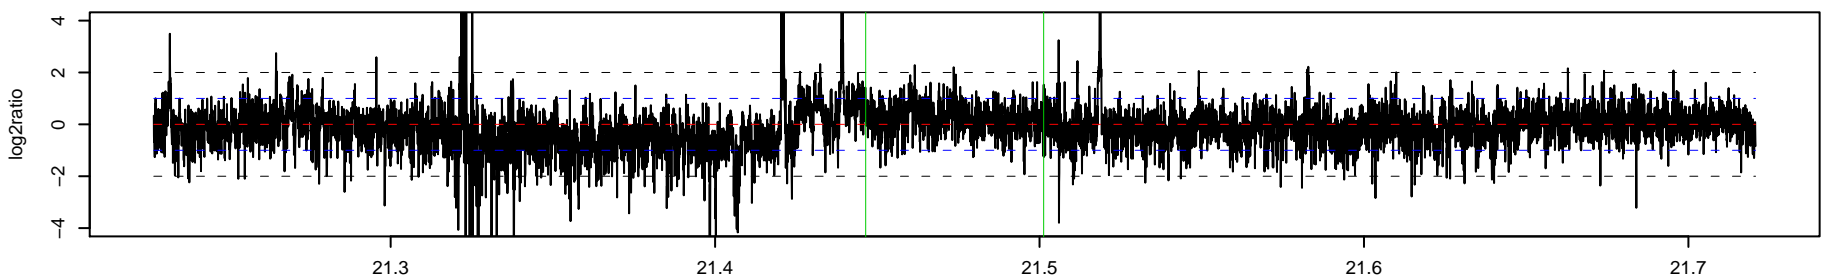

593 \_ AK1 Chr 16 : 22343773 – 22618091 , 274319 bp (aCGH relative log2ratio= 0.39 )

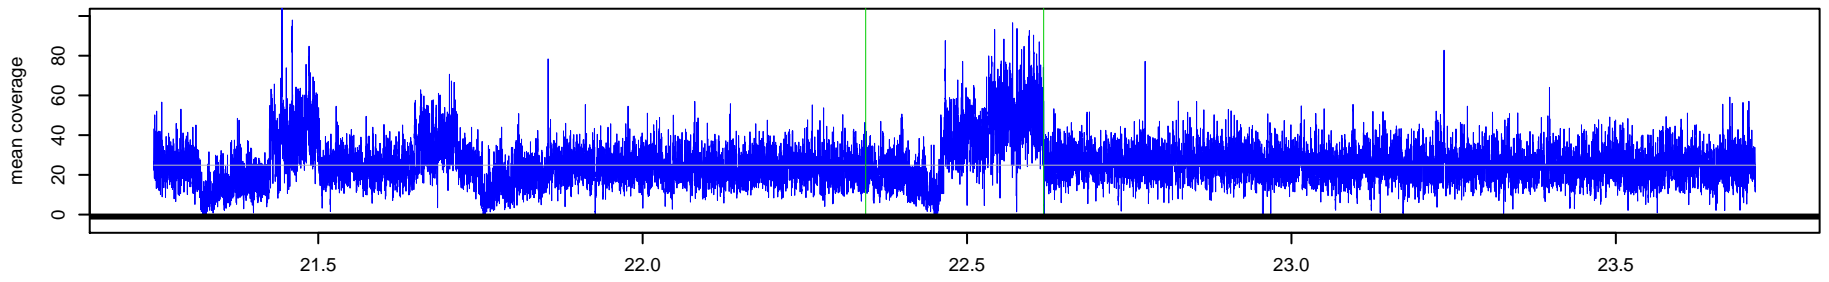

593 \_ NA10851 Chr 16 : 22343773 – 22618091 , 274319 bp (aCGH relative log2ratio= 0.39 )

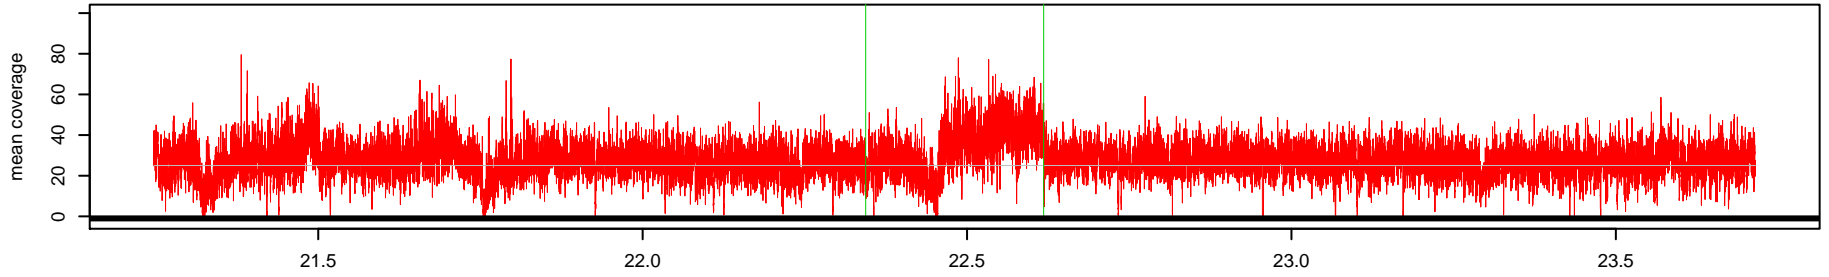

Log2( AK1 read depth / NA10851 read depth)

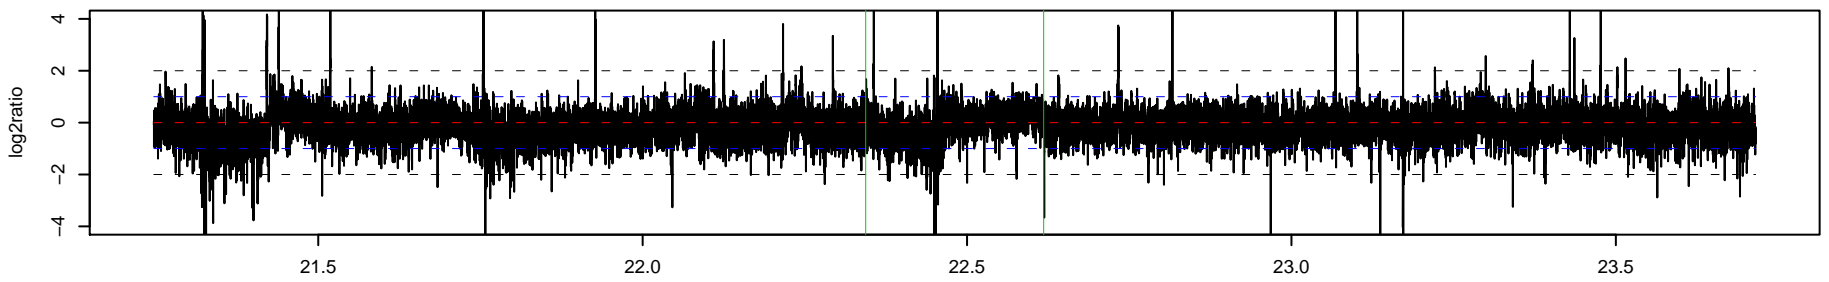

594 \_ AK1 Chr 16 : 23562129 – 23563079 , 951 bp (aCGH relative log2ratio= -0.91 )

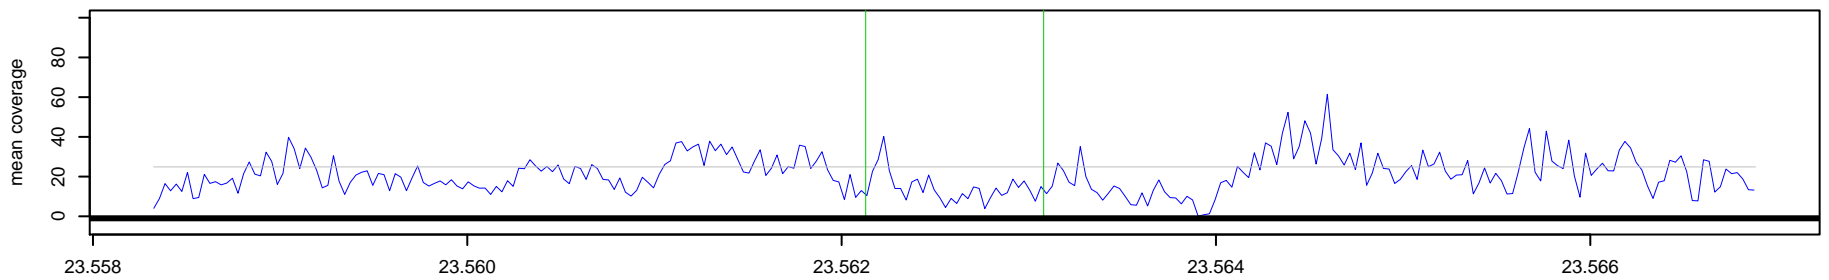

594 \_ NA10851 Chr 16 : 23562129 – 23563079 , 951 bp (aCGH relative log2ratio= -0.91 )

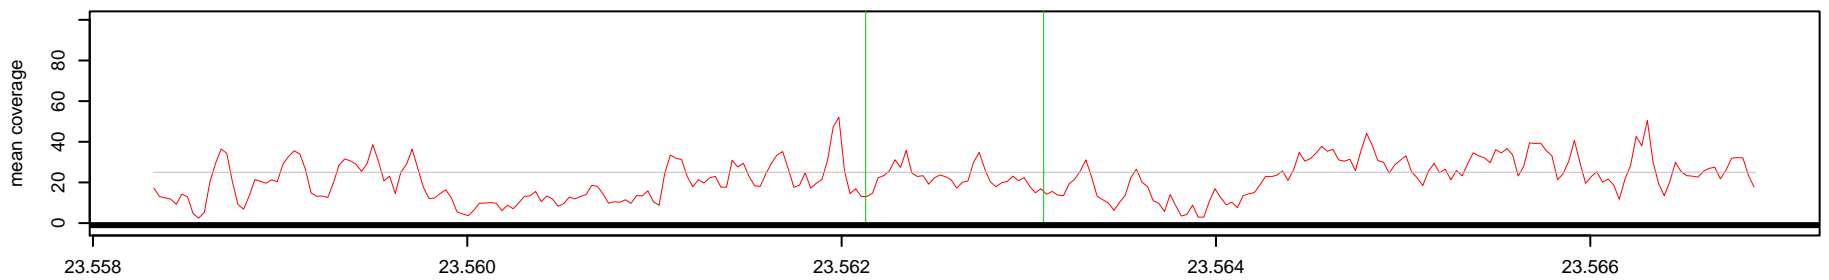

Log2( AK1 read depth / NA10851 read depth)

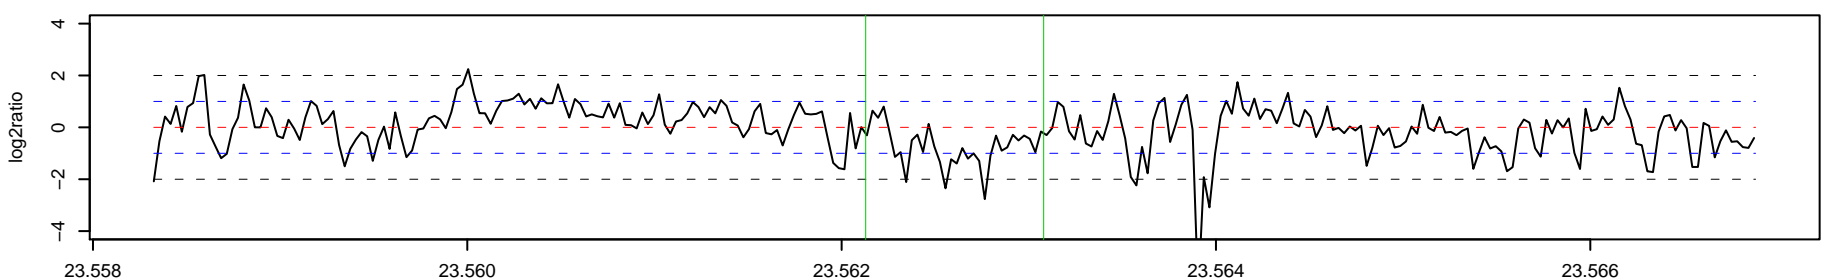

595 \_ AK1 Chr 16 : 26731629 – 26733168 , 1540 bp (aCGH relative log2ratio= -0.55 )

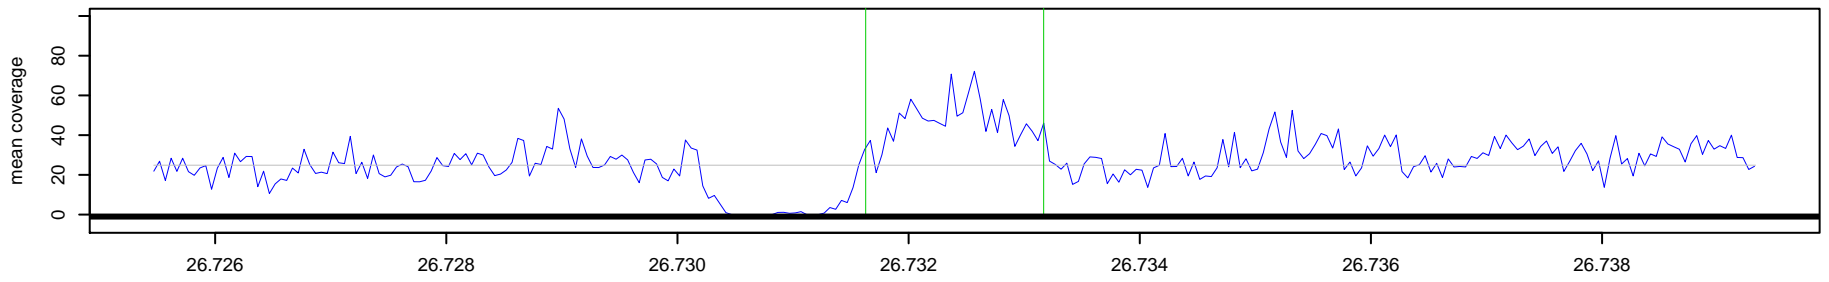

595 \_ NA10851 Chr 16 : 26731629 – 26733168 , 1540 bp (aCGH relative log2ratio= -0.55 )

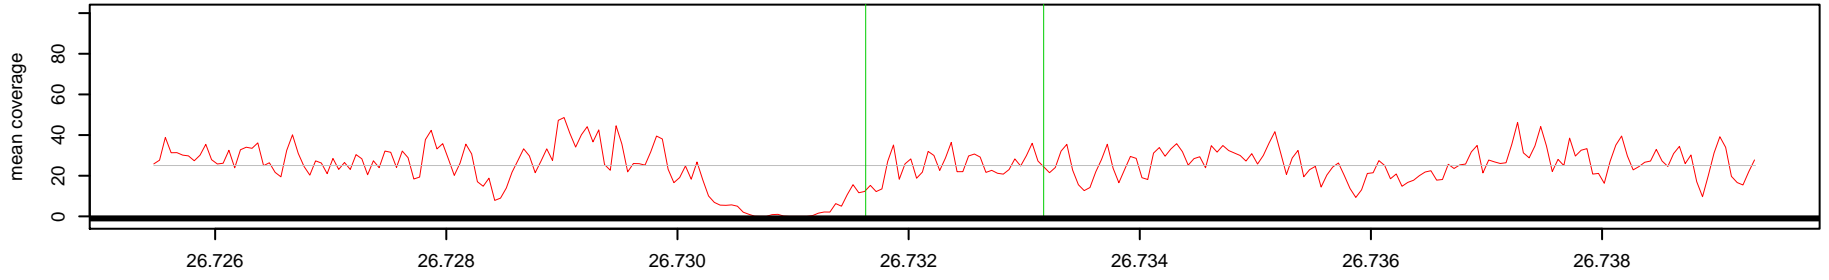

Log2( AK1 read depth / NA10851 read depth)

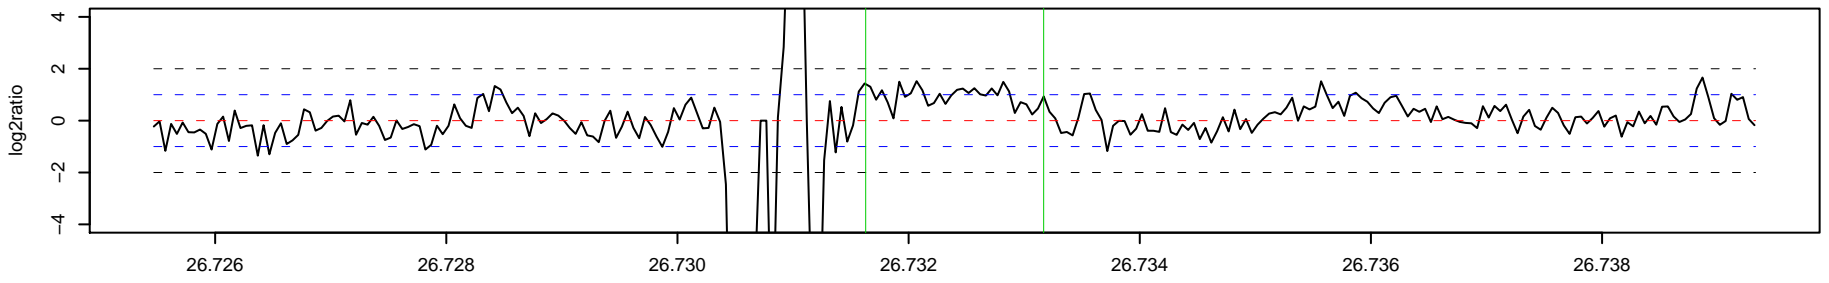

596 \_ AK1 Chr 16 : 54354443 – 54380039 , 25597 bp (aCGH relative log2ratio= -0.50 )

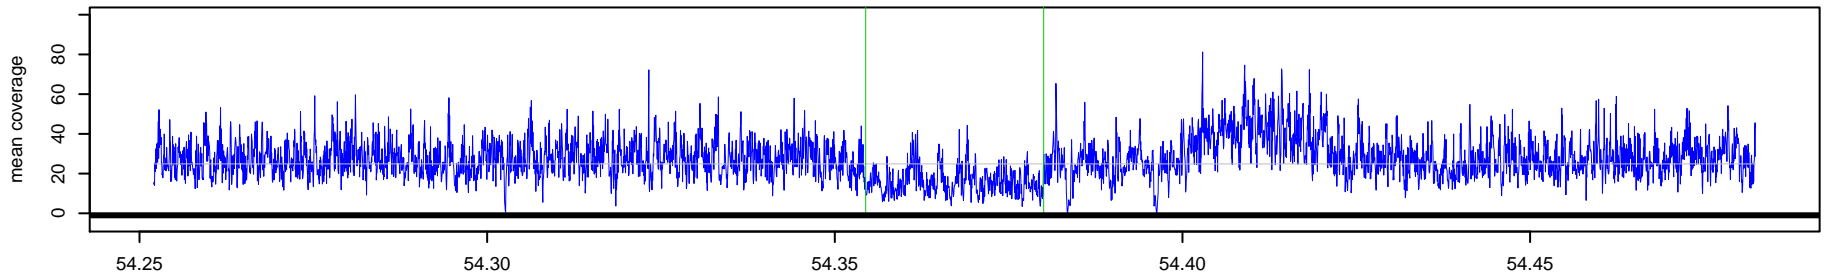

596 \_ NA10851 Chr 16 : 54354443 – 54380039 , 25597 bp (aCGH relative log2ratio= -0.50 )

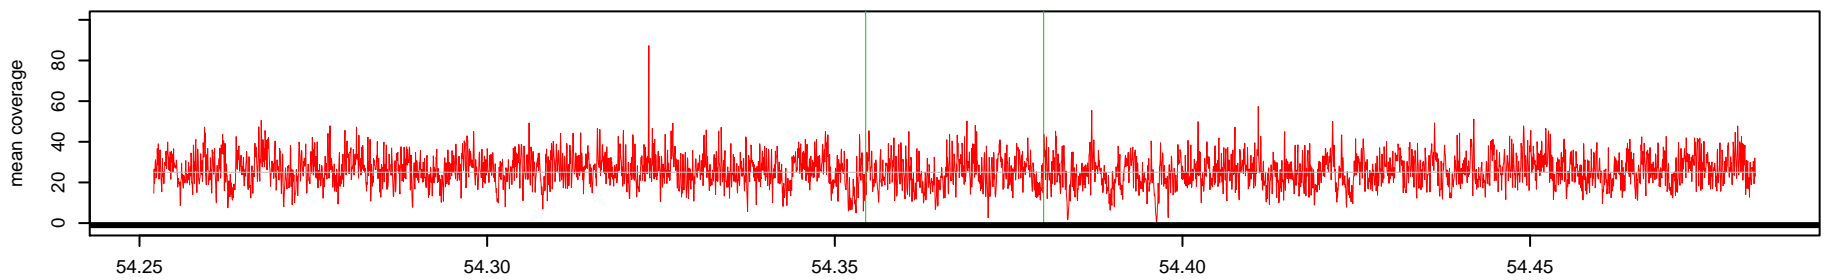

Log2( AK1 read depth / NA10851 read depth)

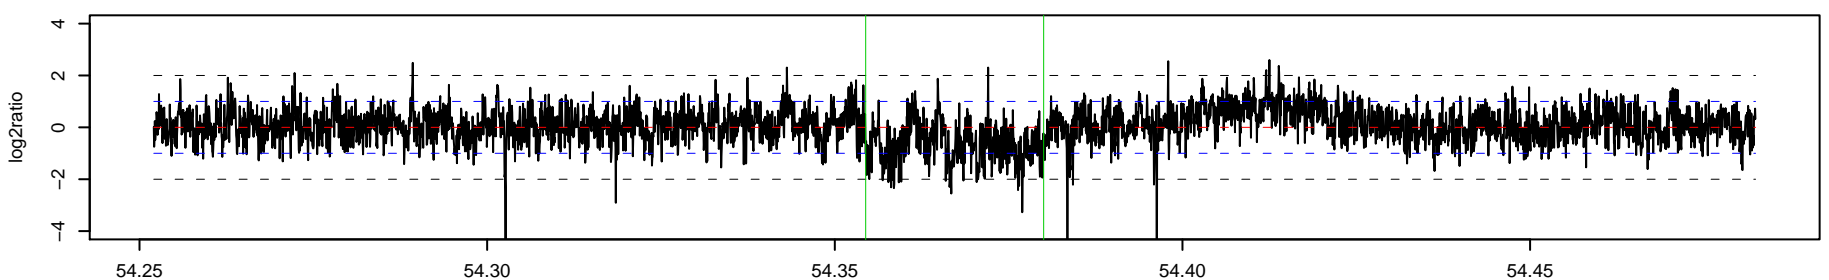

597 \_ AK1 Chr 16 : 57204600 – 57207297 , 2698 bp (aCGH relative log2ratio= 2.06 )

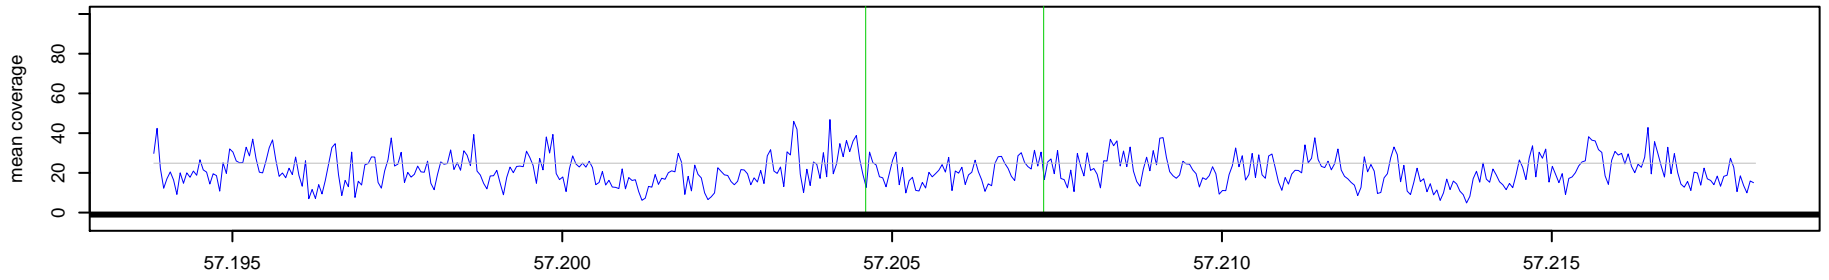

597 \_ NA10851 Chr 16 : 57204600 – 57207297 , 2698 bp (aCGH relative log2ratio= 2.06 )

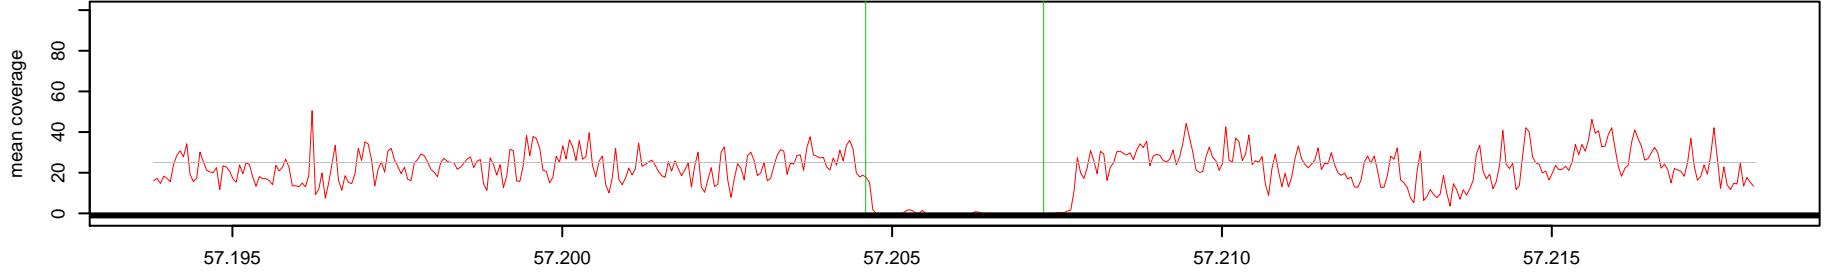

Log2( AK1 read depth / NA10851 read depth)

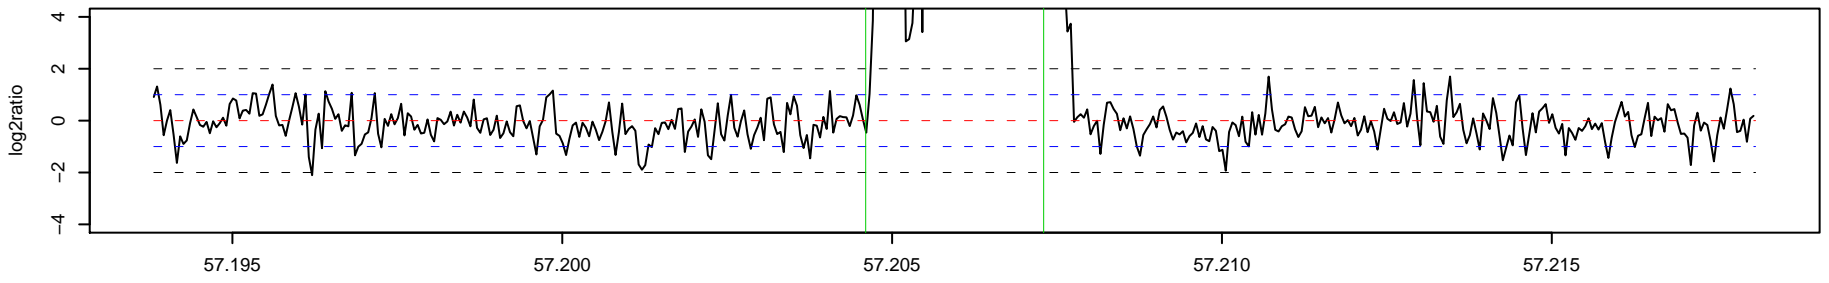

598 \_ AK1 Chr 16 : 58638615 – 58655619 , 17005 bp (aCGH relative log2ratio= -0.74 )

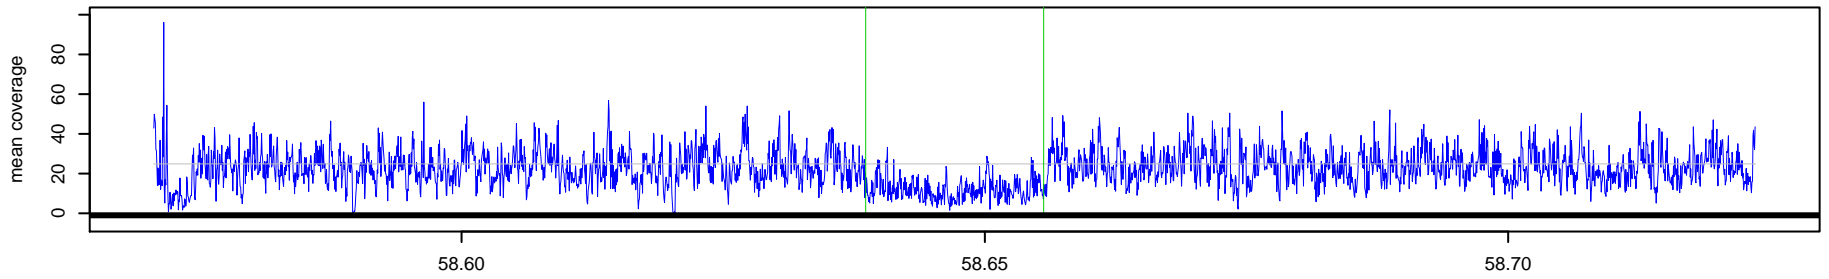

598 \_ NA10851 Chr 16 : 58638615 – 58655619 , 17005 bp (aCGH relative log2ratio= -0.74 )

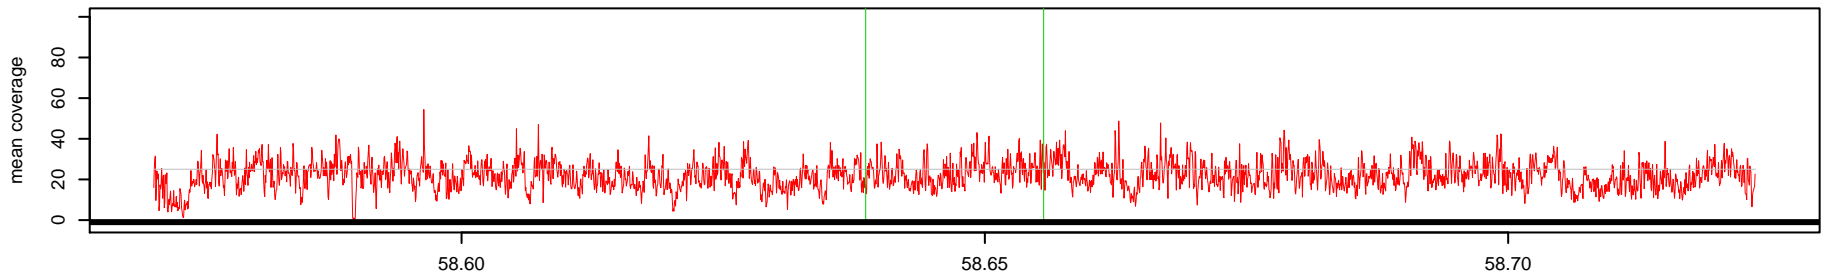

Log2( AK1 read depth / NA10851 read depth)

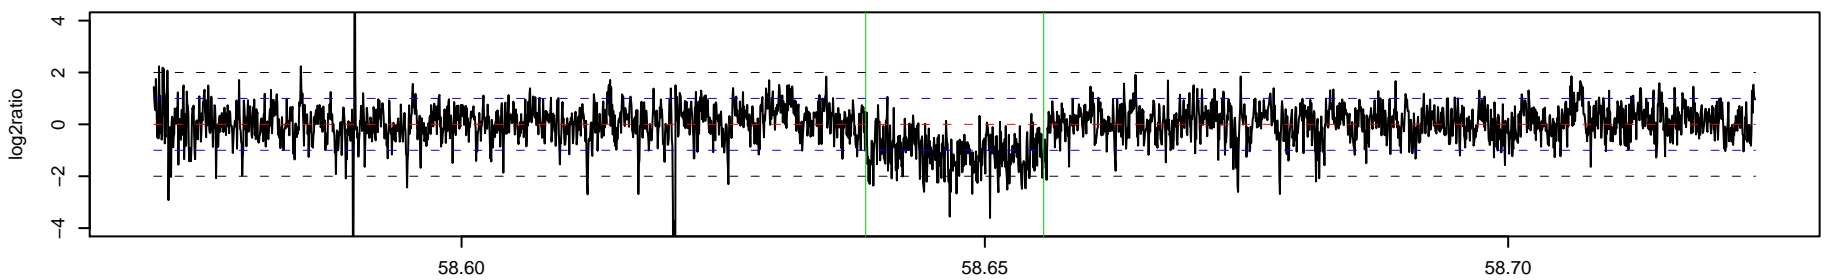

599 \_ AK1 Chr 16 : 68706040 – 68755442 , 49403 bp (aCGH relative log2ratio= -0.79 )

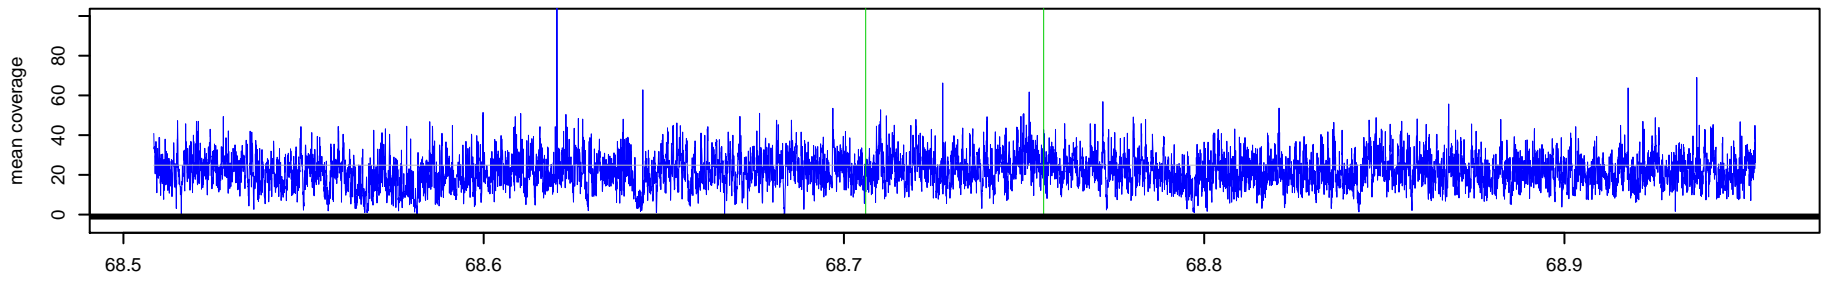

599 \_ NA10851 Chr 16 : 68706040 – 68755442 , 49403 bp (aCGH relative log2ratio= -0.79 )

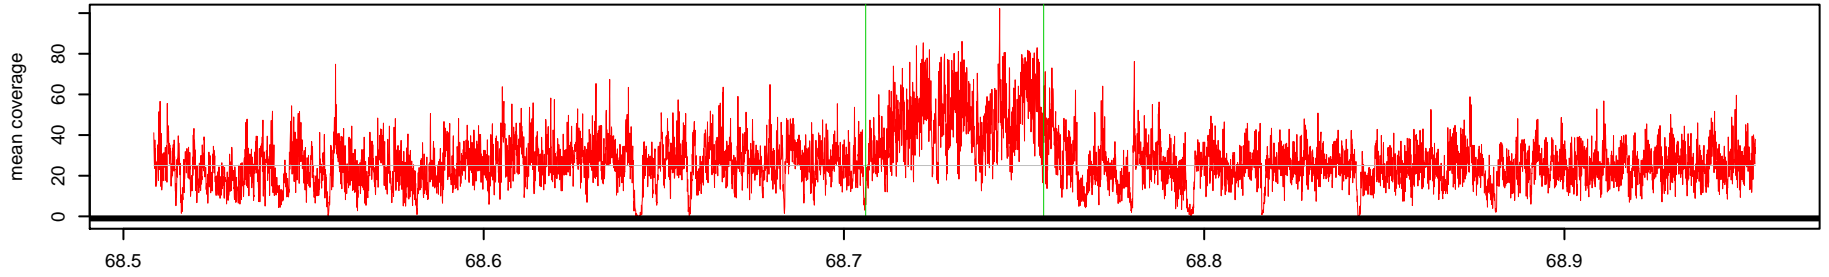

Log2( AK1 read depth / NA10851 read depth)

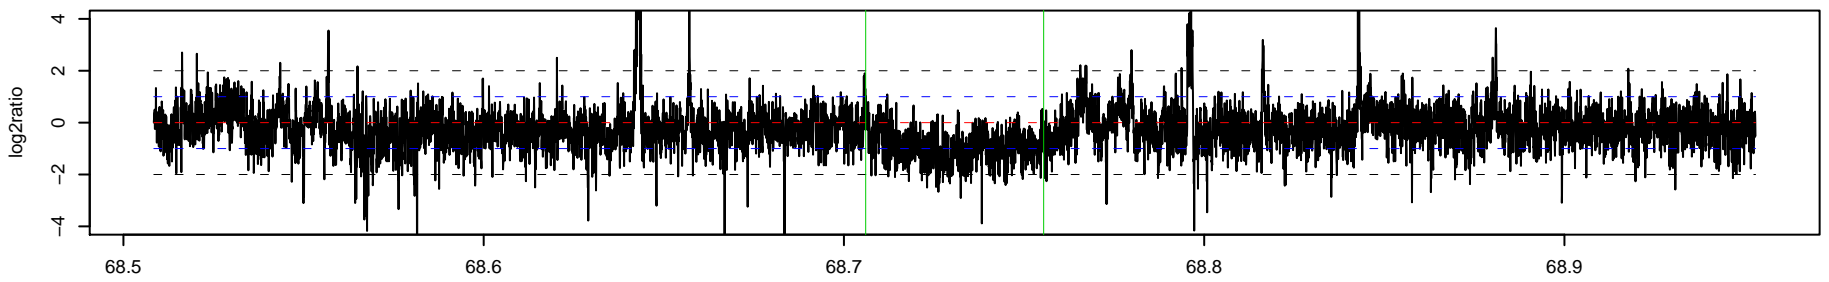

600 \_ AK1 Chr 16 : 72931307 – 72965320 , 34014 bp (aCGH relative log2ratio= -0.64 )

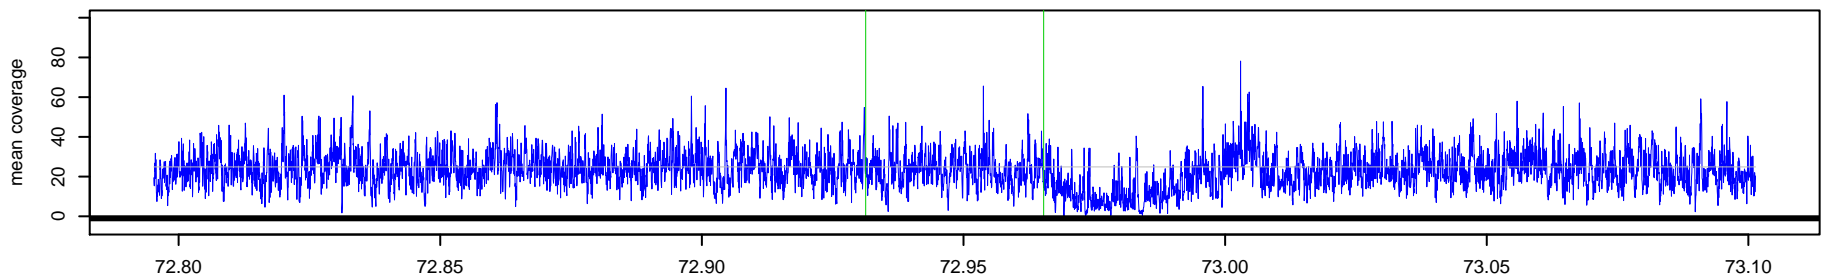

600 \_ NA10851 Chr 16 : 72931307 – 72965320 , 34014 bp (aCGH relative log2ratio= -0.64 )

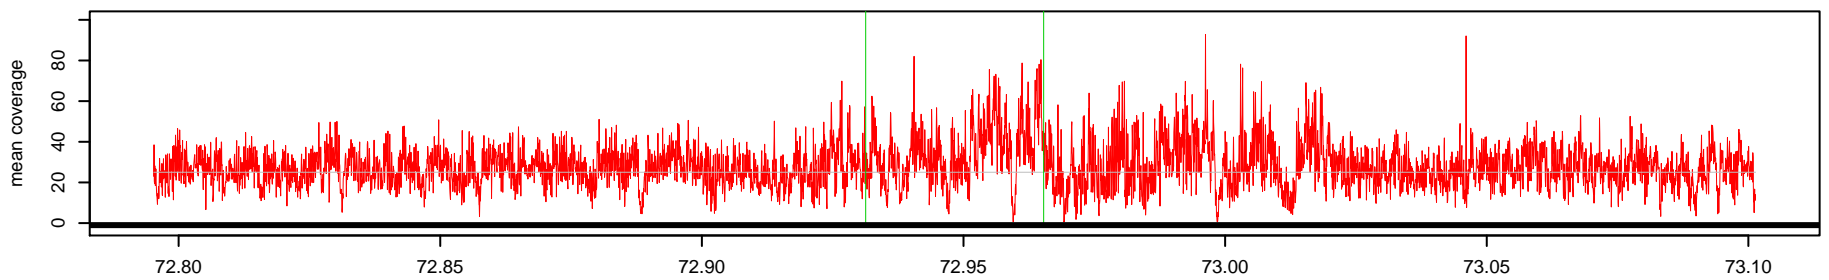

Log2( AK1 read depth / NA10851 read depth)

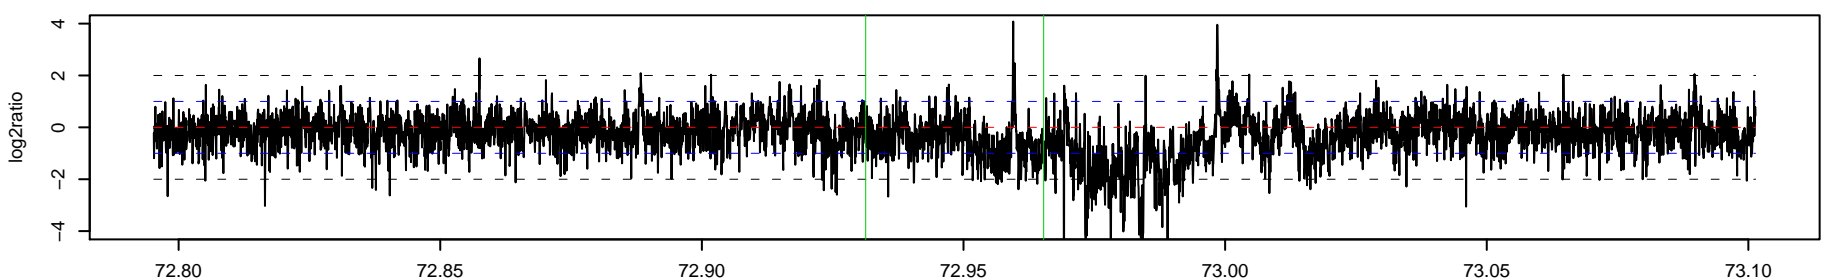



601\_AK1 Chr 16 : 75096826 – 75101065 , 4240 bp (aCGH relative log2ratio= -1.94 )

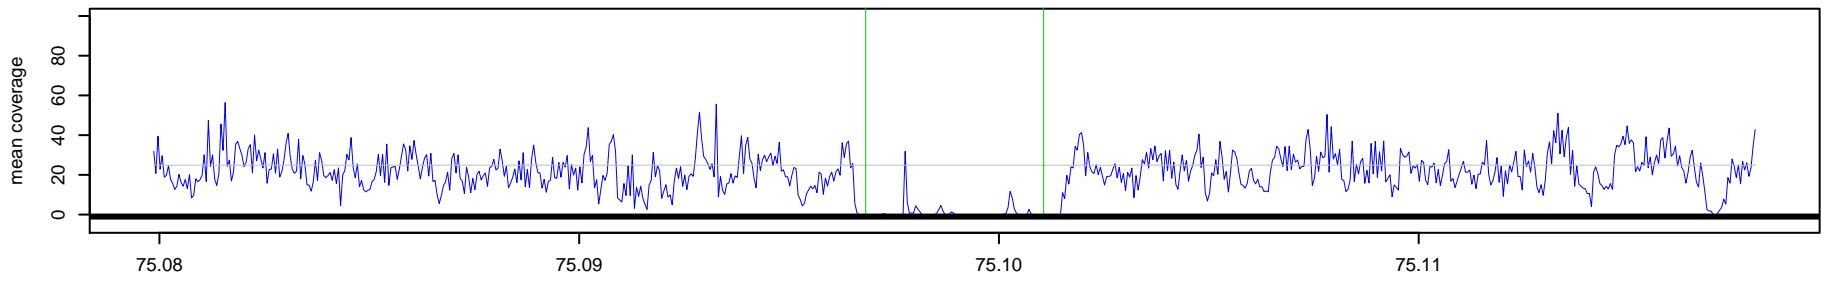

601\_NA10851 Chr 16 : 75096826 – 75101065 , 4240 bp (aCGH relative log2ratio= -1.94 )

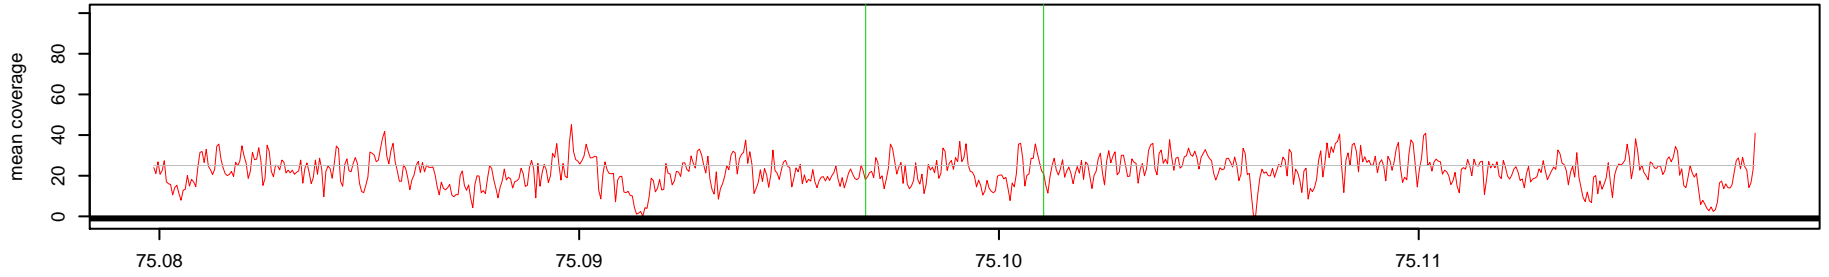

Log2( AK1 read depth / NA10851 read depth)

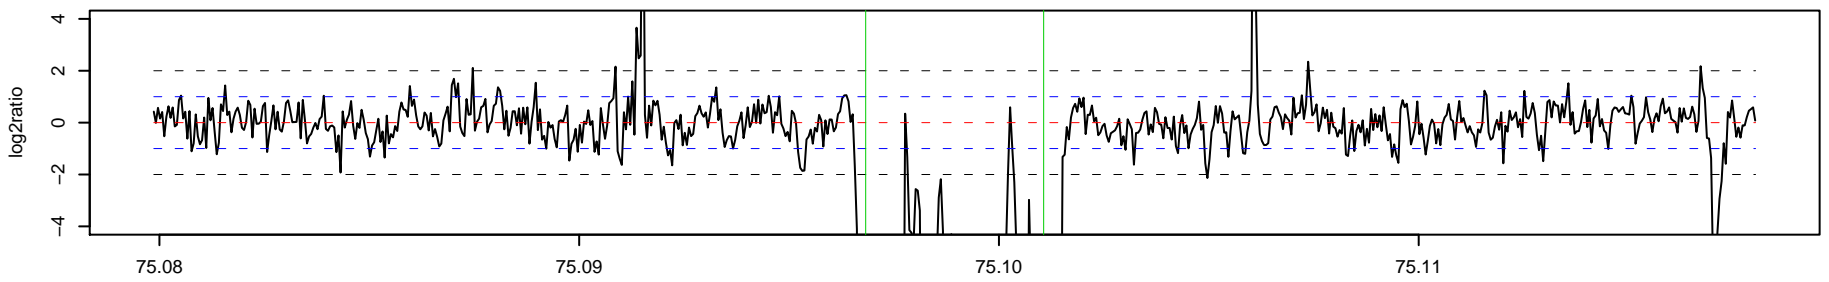

602\_AK1 Chr 16 : 76929139 – 76941790 , 12652 bp (aCGH relative log2ratio= 0.57 )

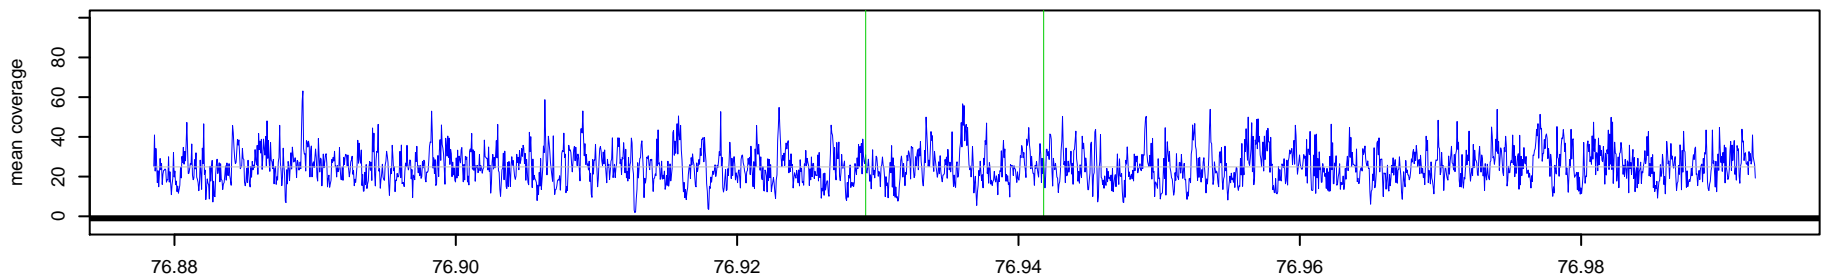

602\_NA10851 Chr 16 : 76929139 – 76941790 , 12652 bp (aCGH relative log2ratio= 0.57 )

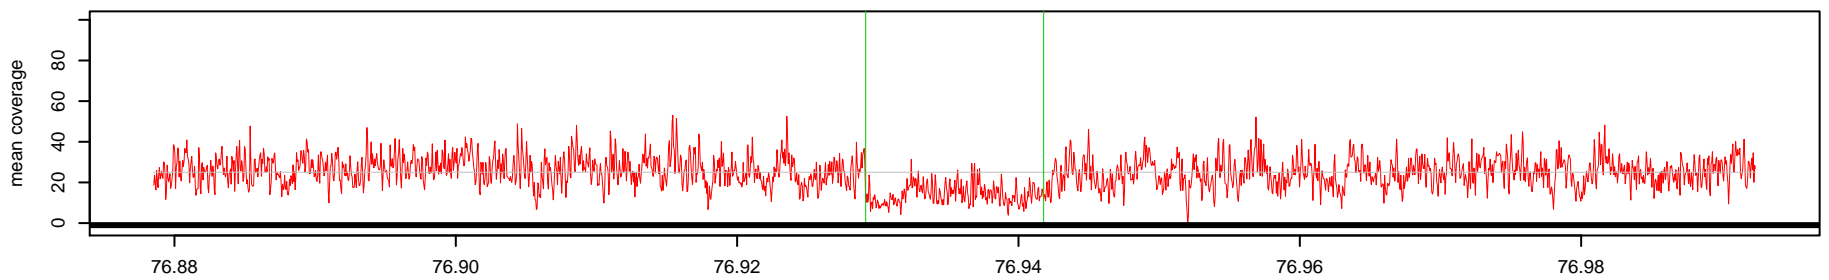

Log2( AK1 read depth / NA10851 read depth)

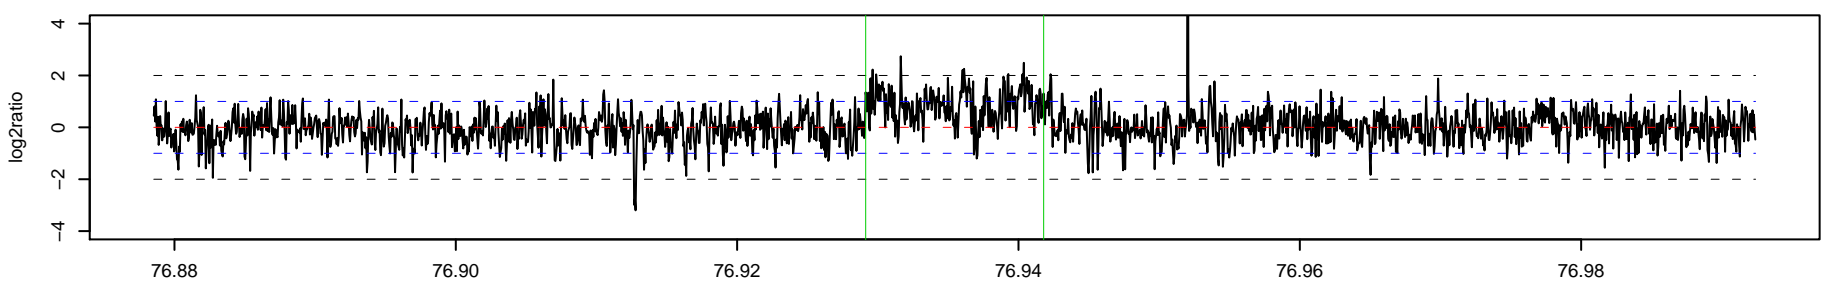

603\_AK1 Chr 16 : 86670192 – 86671389 , 1198 bp (aCGH relative log2ratio= -0.86 )

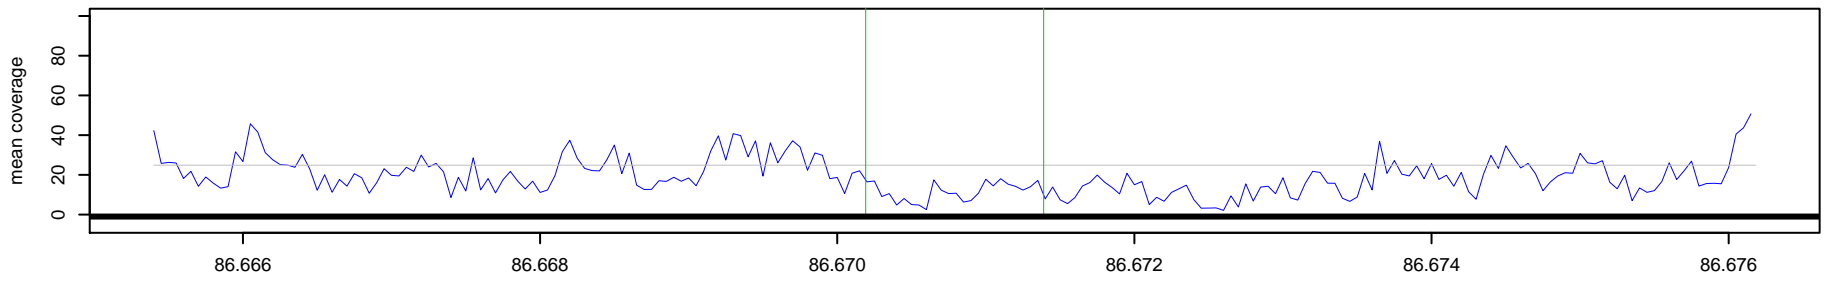

603\_NA10851 Chr 16 : 86670192 – 86671389 , 1198 bp (aCGH relative log2ratio= -0.86 )

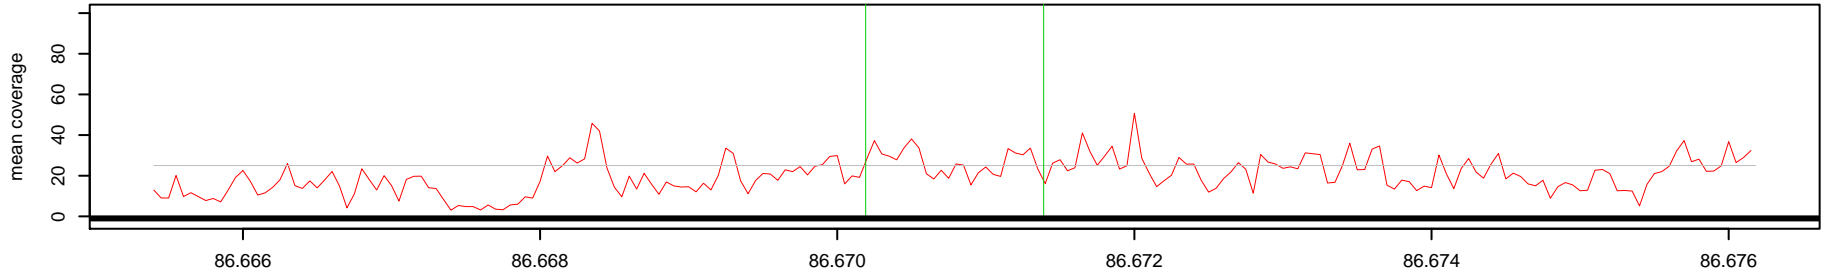

Log2( AK1 read depth / NA10851 read depth)

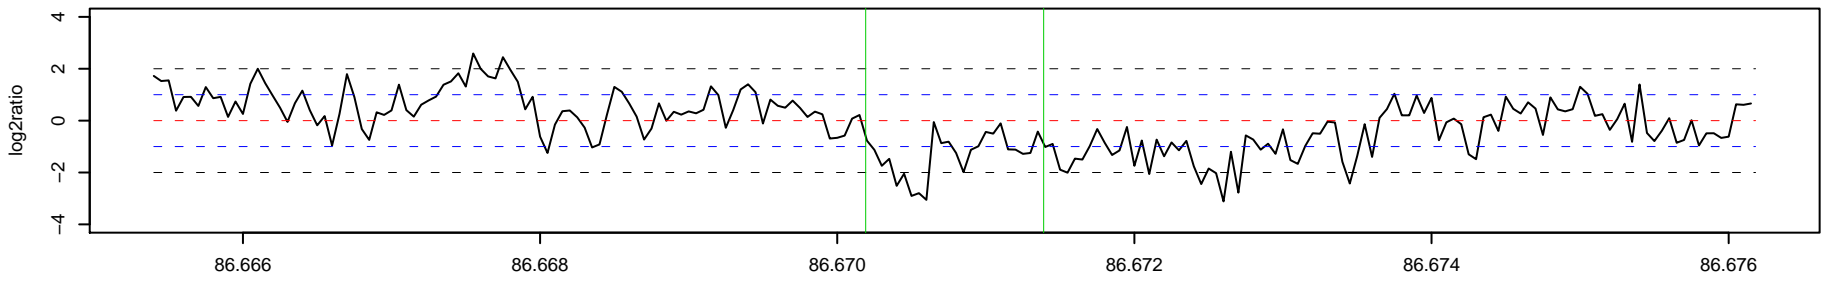

604\_AK1 Chr 17 : 10831181 – 10836433 , 5253 bp (aCGH relative log2ratio= -0.64 )

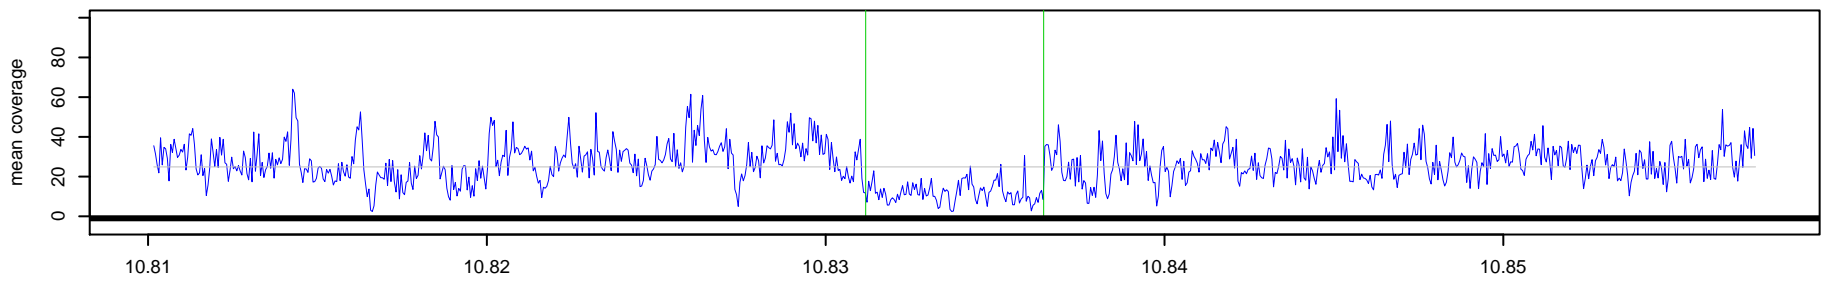

604\_NA10851 Chr 17 : 10831181 – 10836433 , 5253 bp (aCGH relative log2ratio= -0.64 )

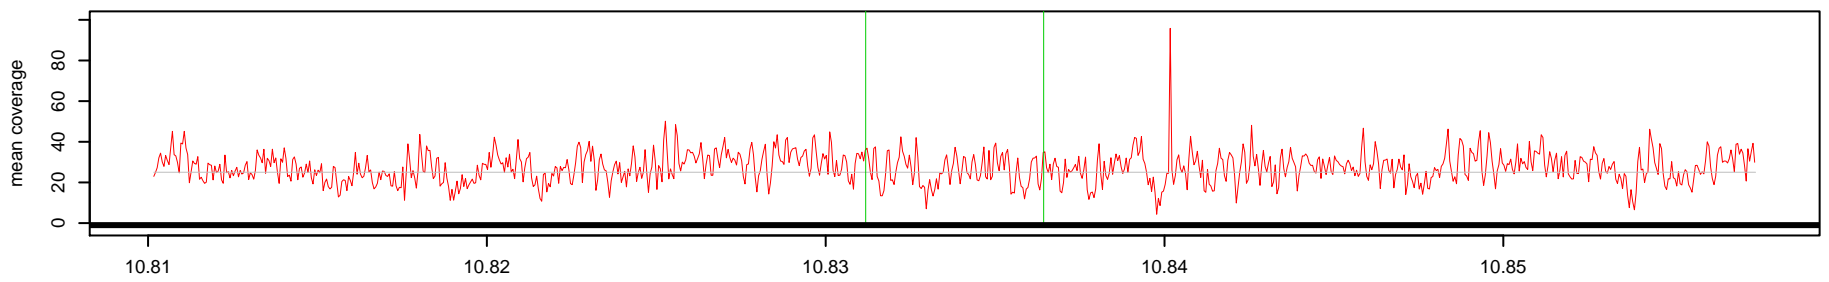

Log2( AK1 read depth / NA10851 read depth)

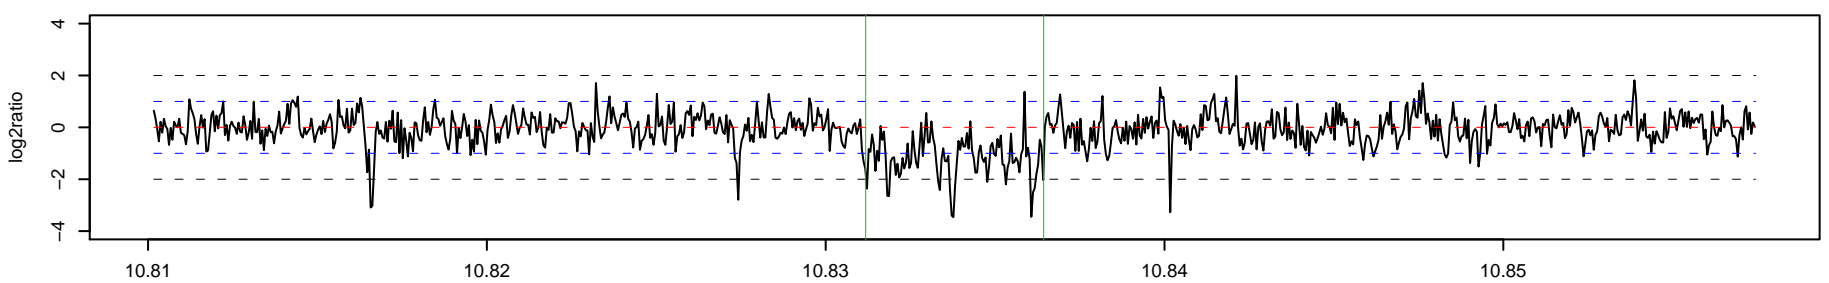

605\_AK1 Chr 17 : 22800939 – 22805201 , 4263 bp (aCGH relative log2ratio= -0.66 )

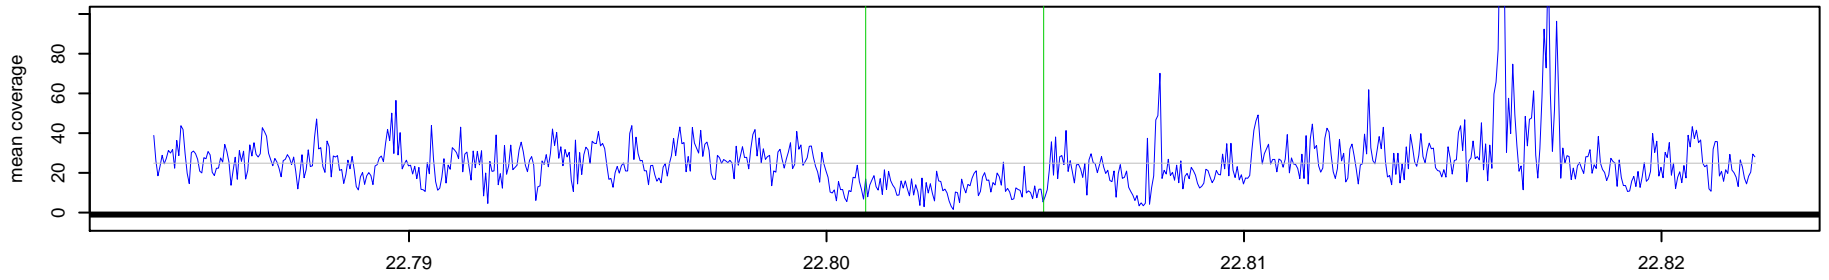

605\_NA10851 Chr 17 : 22800939 – 22805201 , 4263 bp (aCGH relative log2ratio= -0.66 )

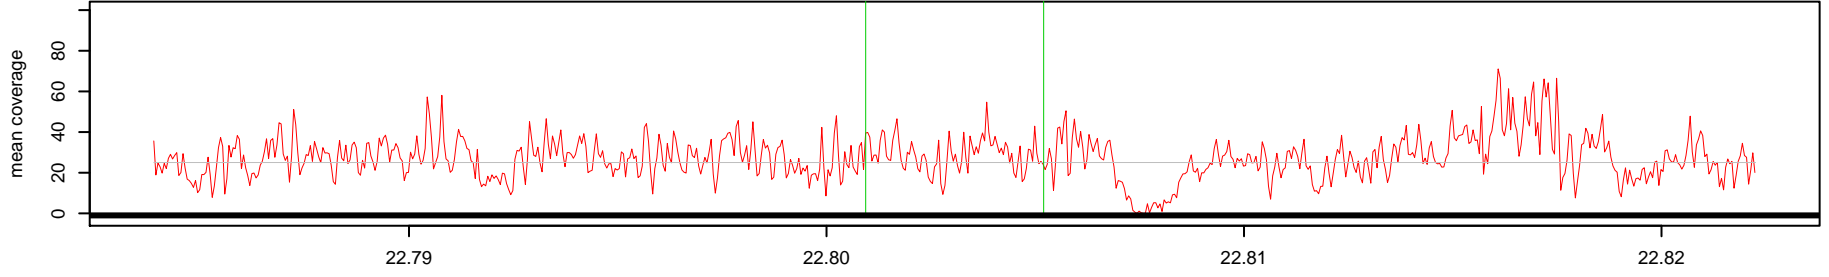

Log2( AK1 read depth / NA10851 read depth)

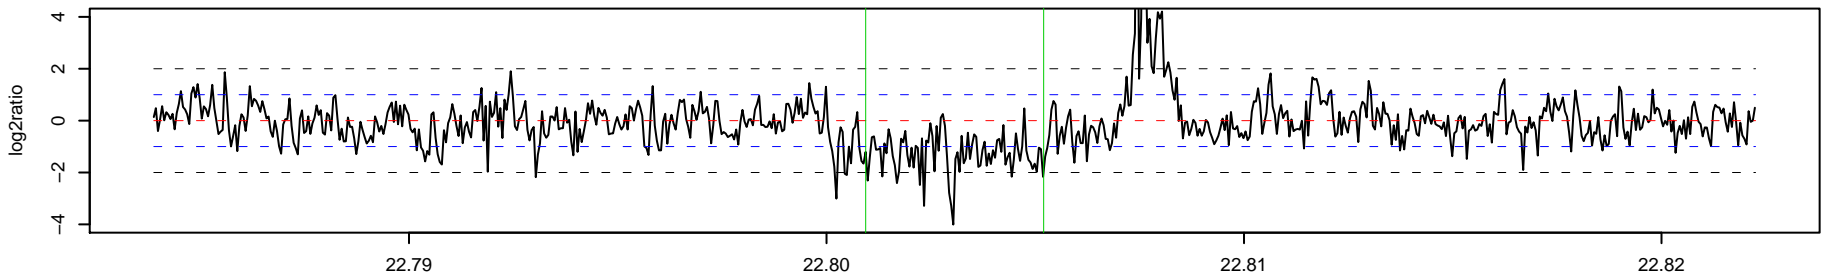

606\_AK1 Chr 17 : 32829757 – 32832905 , 3149 bp (aCGH relative log2ratio= 0.61 )

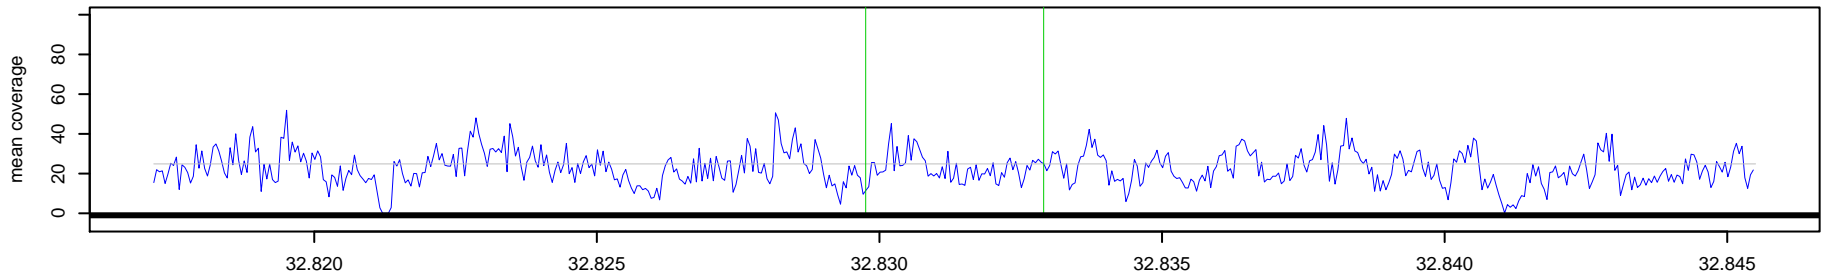

606\_NA10851 Chr 17 : 32829757 – 32832905 , 3149 bp (aCGH relative log2ratio= 0.61 )

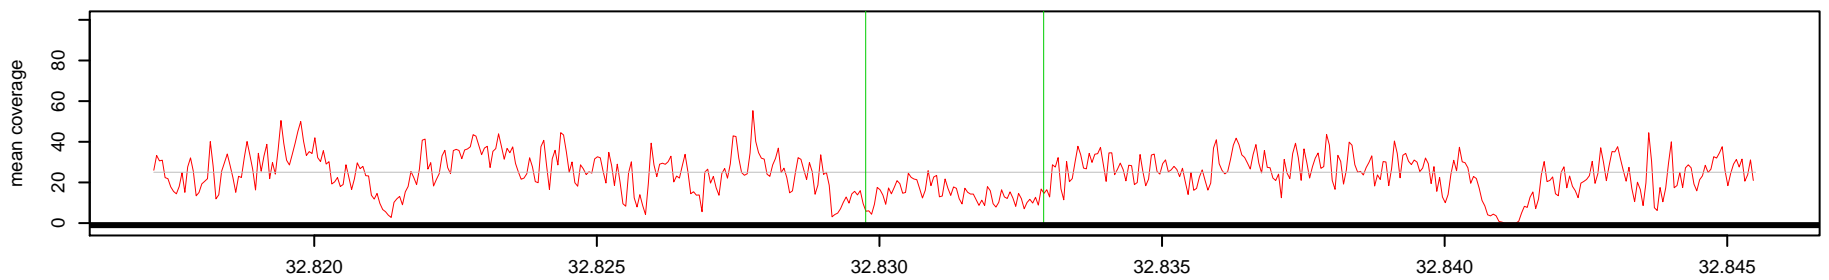

Log2( AK1 read depth / NA10851 read depth)

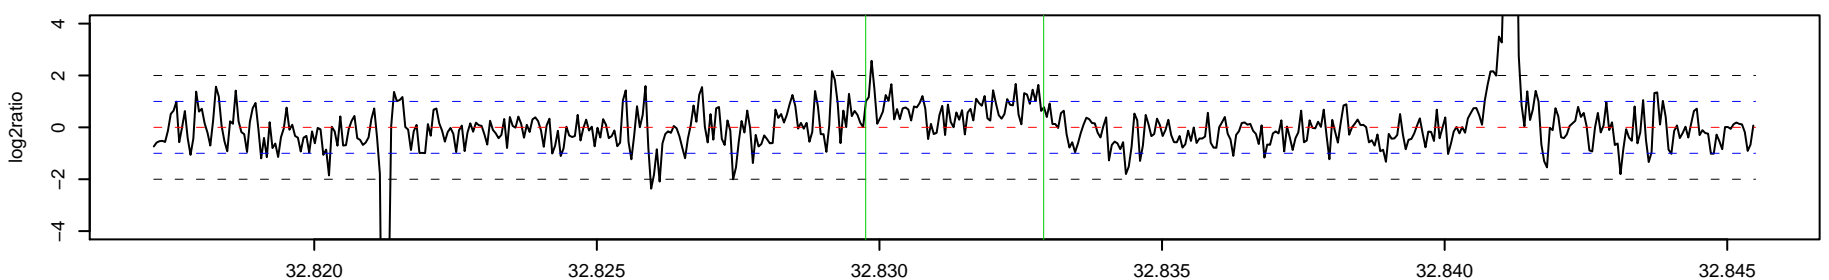

607\_AK1 Chr 17 : 36675806 – 36685412 , 9607 bp (aCGH relative log2ratio= -0.68 )

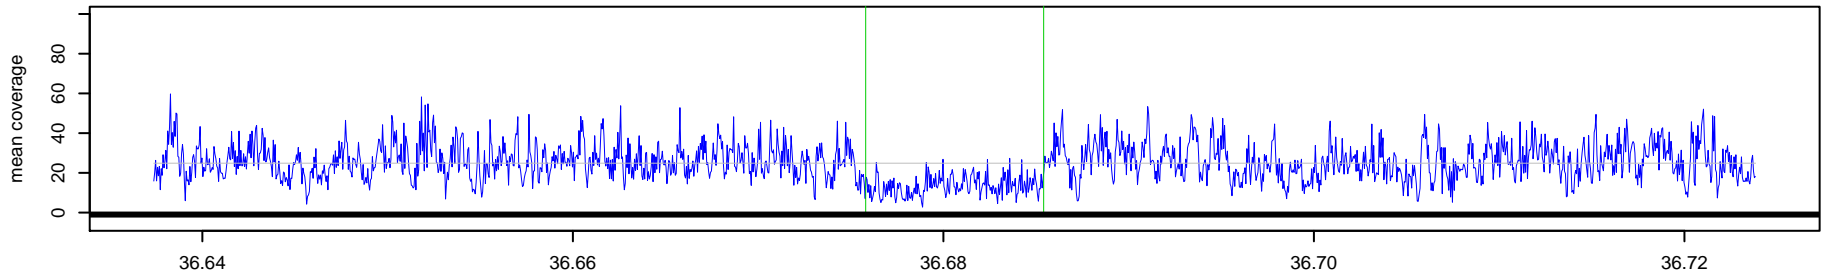

607\_NA10851 Chr 17 : 36675806 – 36685412 , 9607 bp (aCGH relative log2ratio= -0.68 )

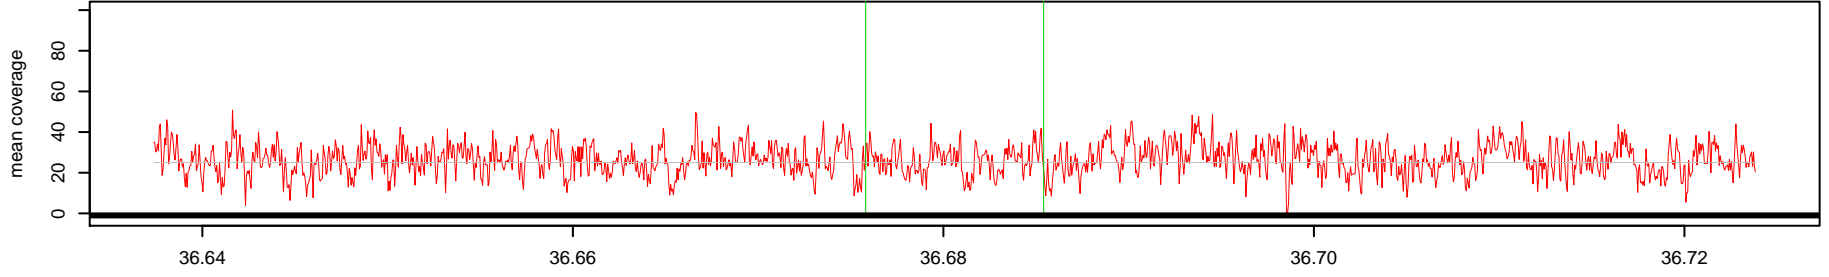

Log2( AK1 read depth / NA10851 read depth)

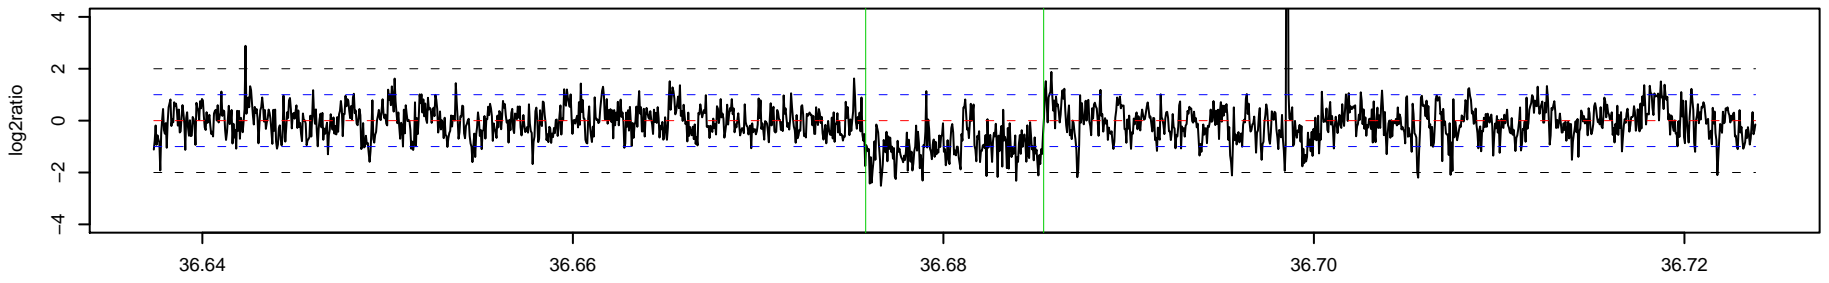

608\_AK1 Chr 17 : 38795661 – 38800014 , 4354 bp (aCGH relative log2ratio= -0.56 )

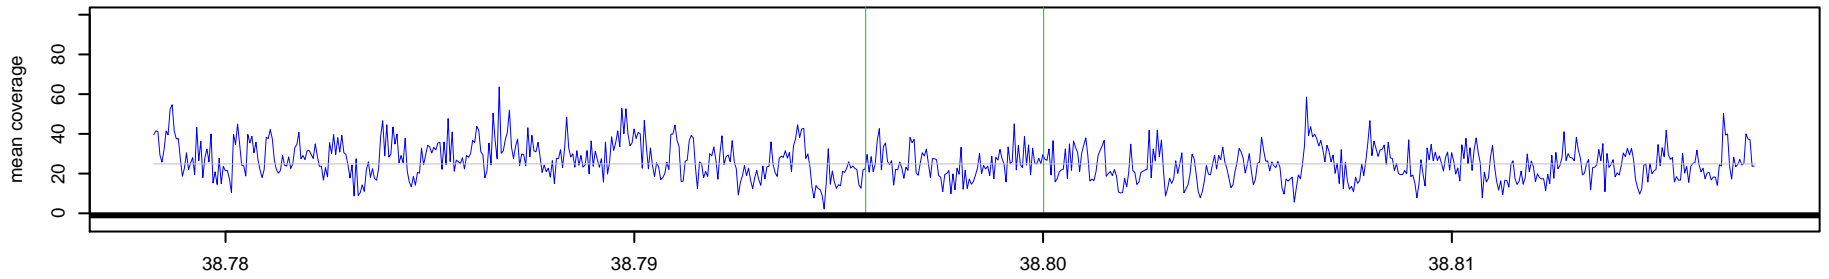

608\_NA10851 Chr 17 : 38795661 – 38800014 , 4354 bp (aCGH relative log2ratio= -0.56 )

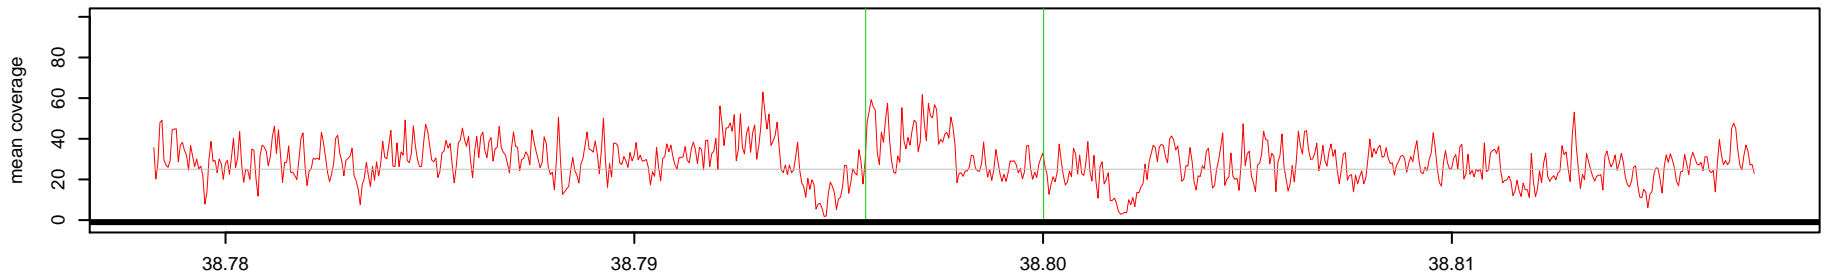

Log2( AK1 read depth / NA10851 read depth)

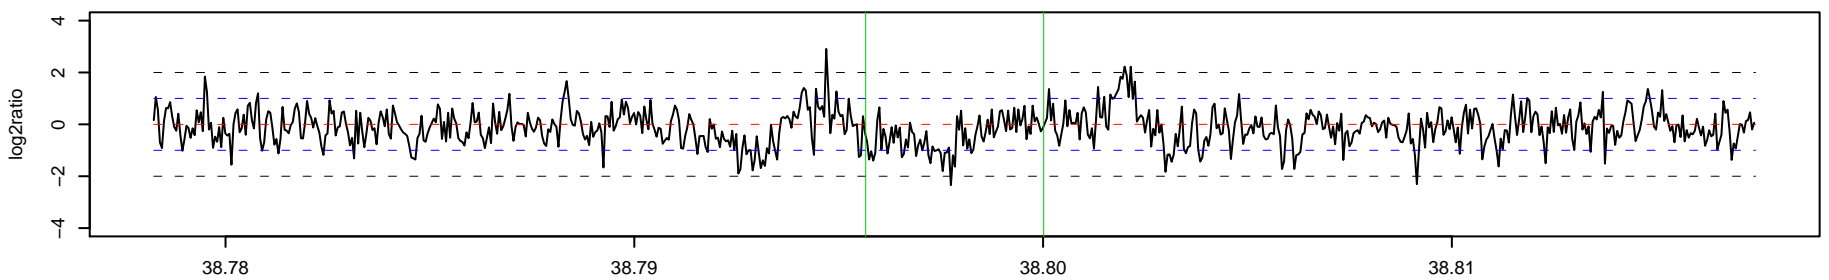

609\_AK1 Chr 17 : 45278522 – 45280166 , 1645 bp (aCGH relative log2ratio= -0.46 )

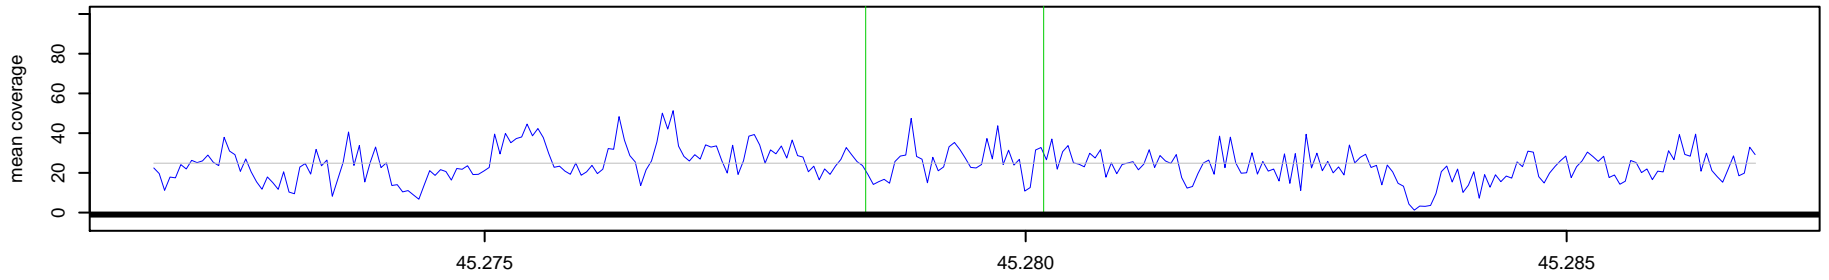

609\_NA10851 Chr 17 : 45278522 – 45280166 , 1645 bp (aCGH relative log2ratio= -0.46 )

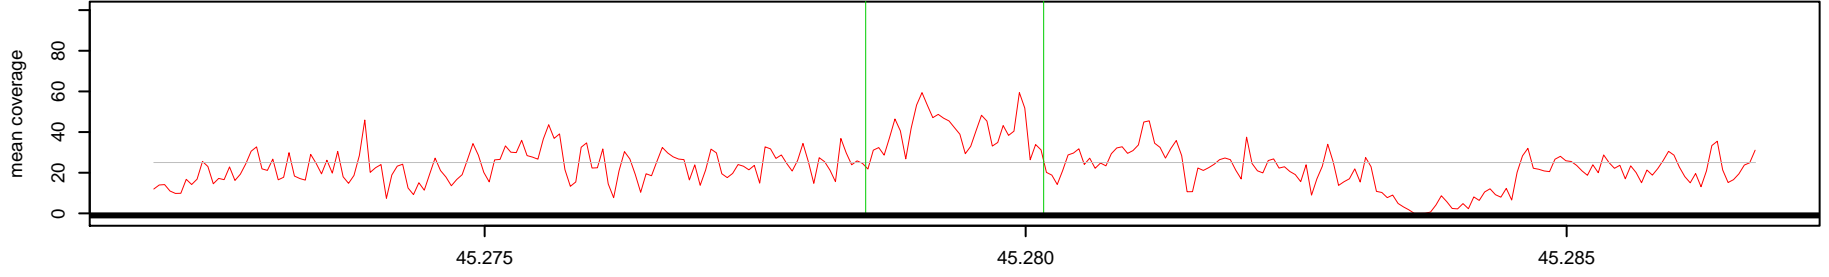

Log2( AK1 read depth / NA10851 read depth)

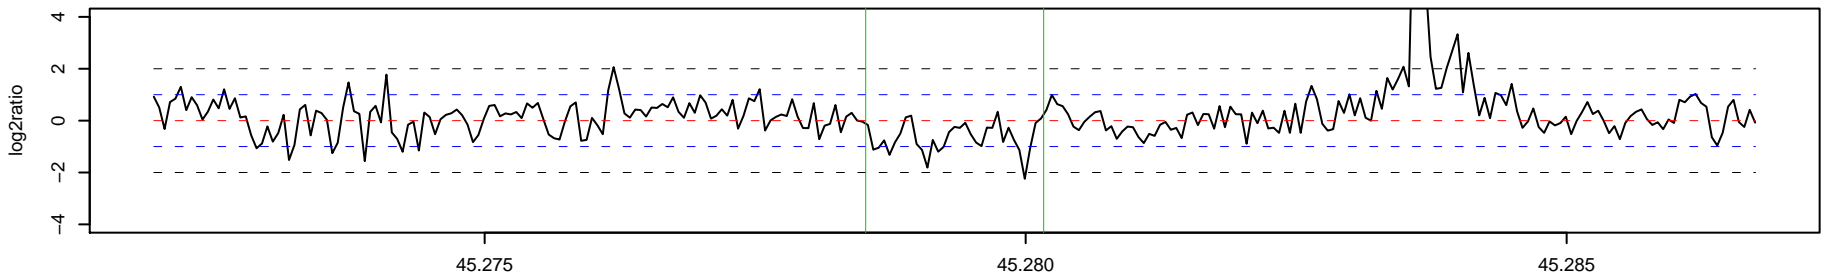

610\_AK1 Chr 17 : 49208950 – 49212150 , 3201 bp (aCGH relative log2ratio= -0.63 )

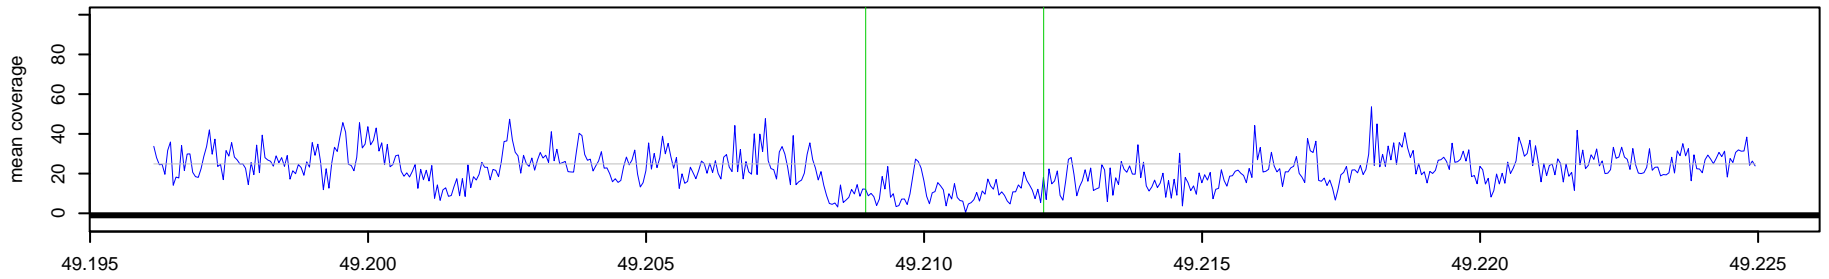

610\_NA10851 Chr 17 : 49208950 – 49212150 , 3201 bp (aCGH relative log2ratio= -0.63 )

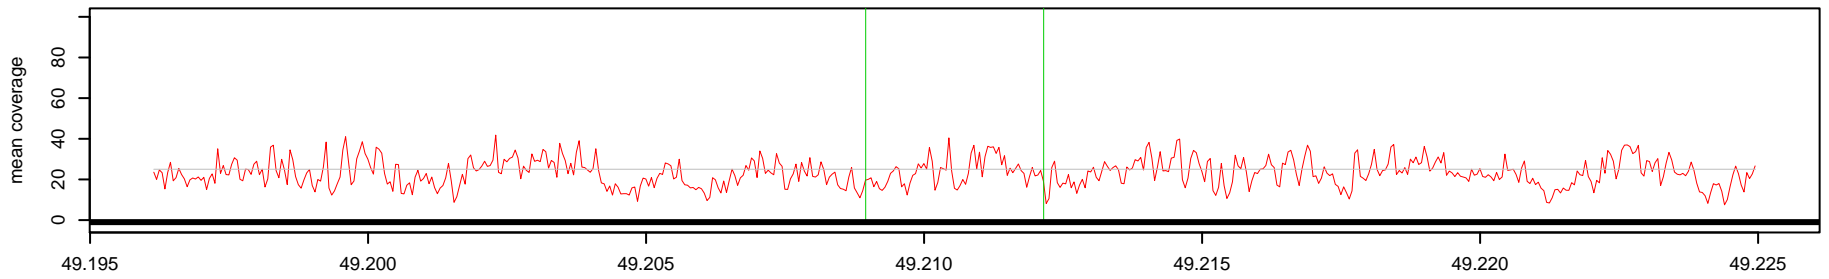

Log2( AK1 read depth / NA10851 read depth)

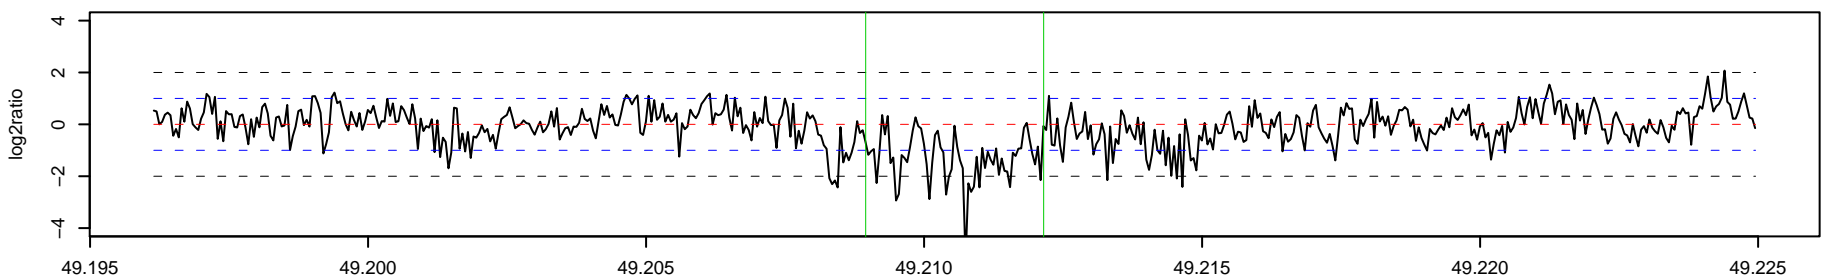

611\_AK1 Chr 17 : 52444837 - 52447264 , 2428 bp (aCGH relative log2ratio= 0.66 )

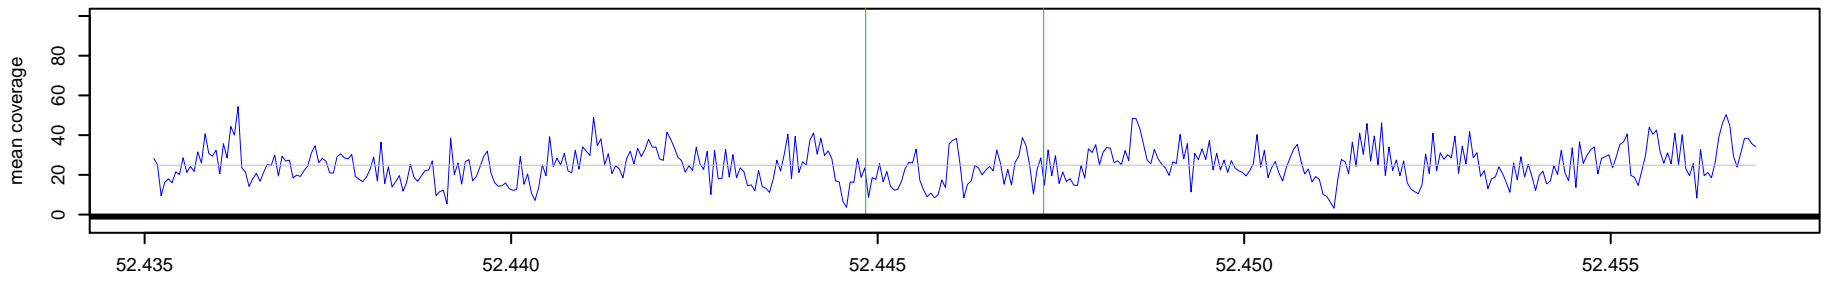

611\_NA10851 Chr 17 : 52444837 - 52447264 , 2428 bp (aCGH relative log2ratio= 0.66 )

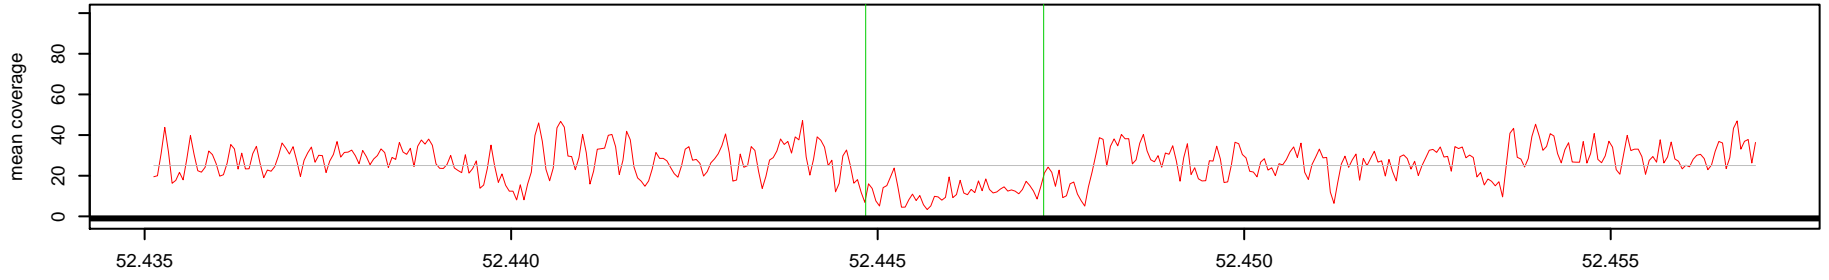

Log2( AK1 read depth / NA10851 read depth)

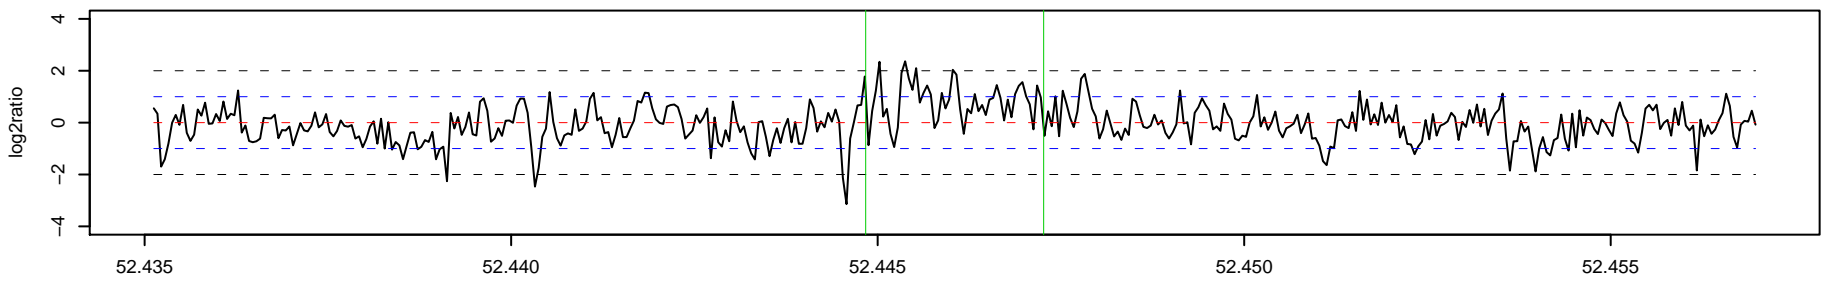

612\_AK1 Chr 17 : 53042759 - 53044835 , 2077 bp (aCGH relative log2ratio= 0.92 )

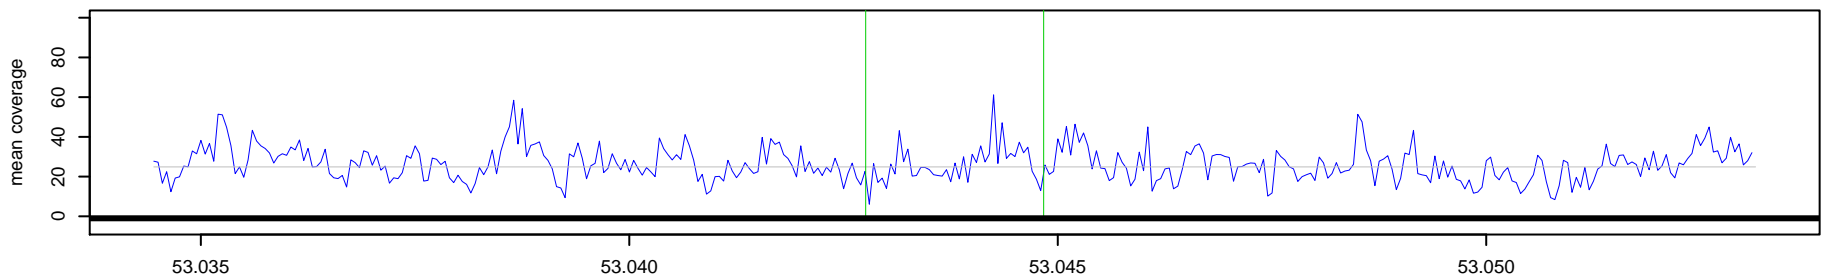

612\_NA10851 Chr 17 : 53042759 - 53044835 , 2077 bp (aCGH relative log2ratio= 0.92 )

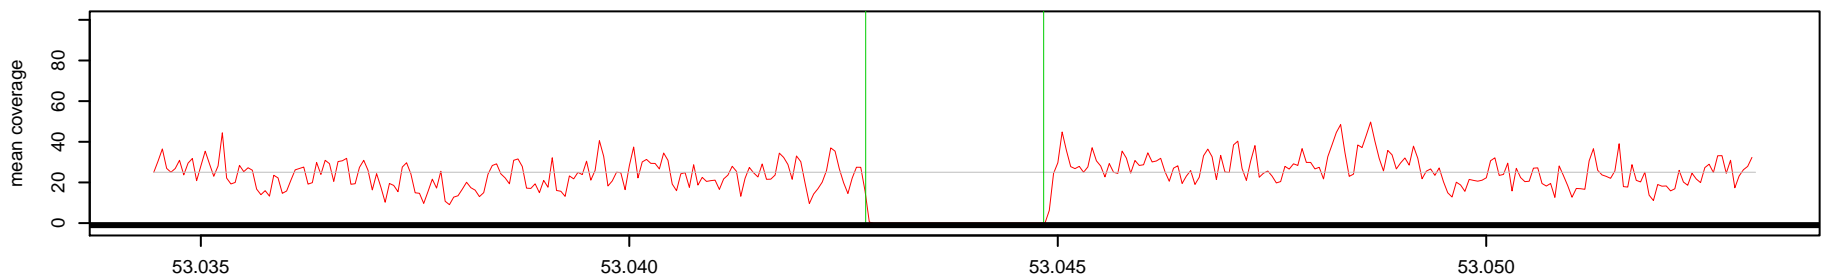

Log2( AK1 read depth / NA10851 read depth)

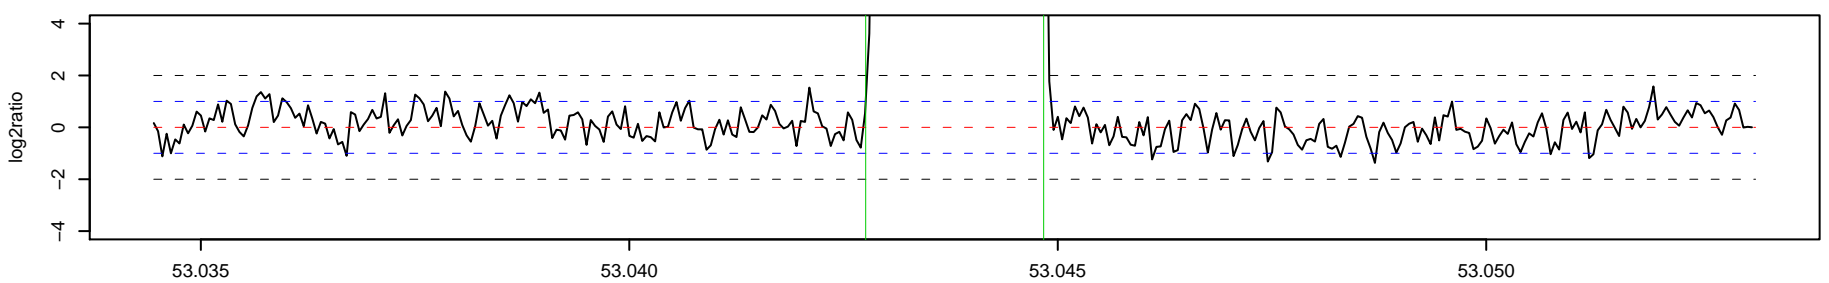

613\_AK1 Chr 17 : 76449250 – 76449954 , 705 bp (aCGH relative log2ratio= -0.72 )

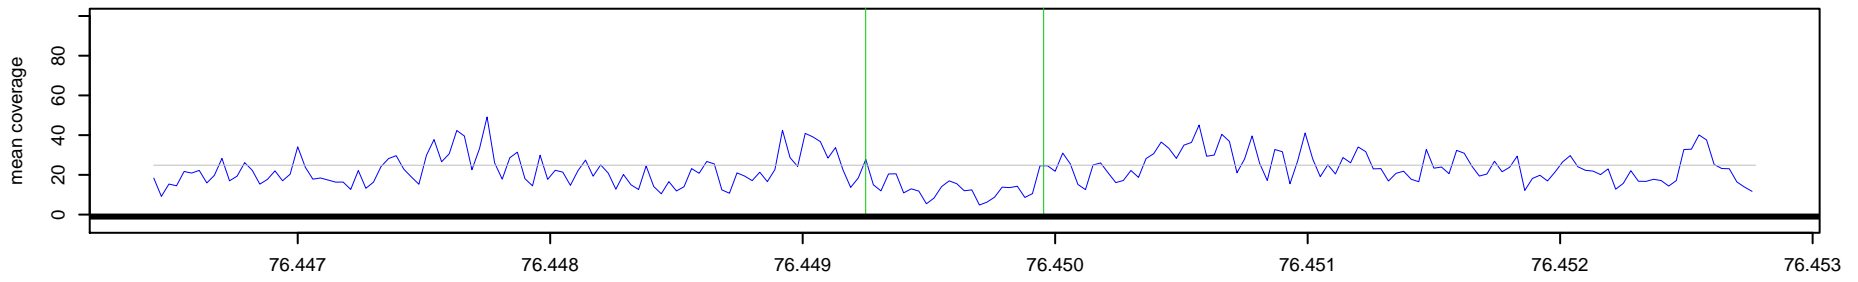

613\_NA10851 Chr 17 : 76449250 – 76449954 , 705 bp (aCGH relative log2ratio= -0.72 )

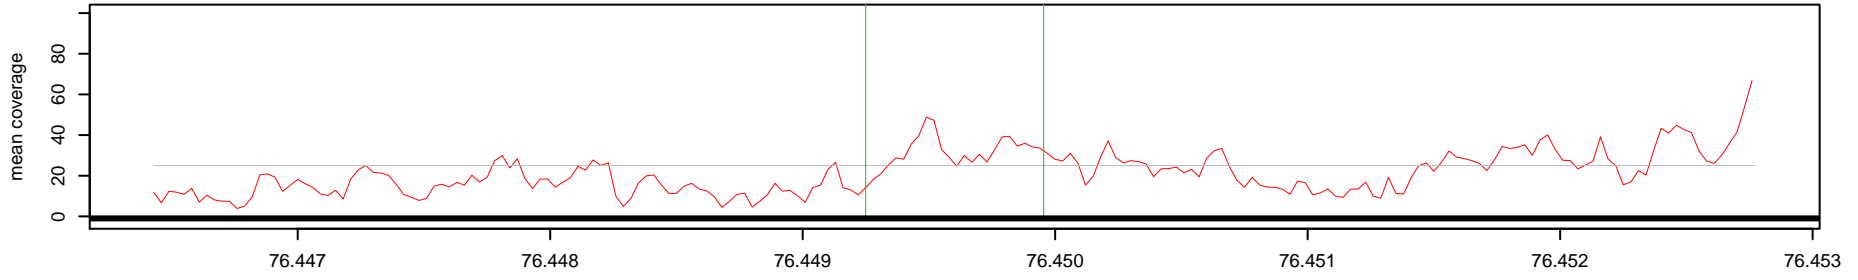

Log2( AK1 read depth / NA10851 read depth)

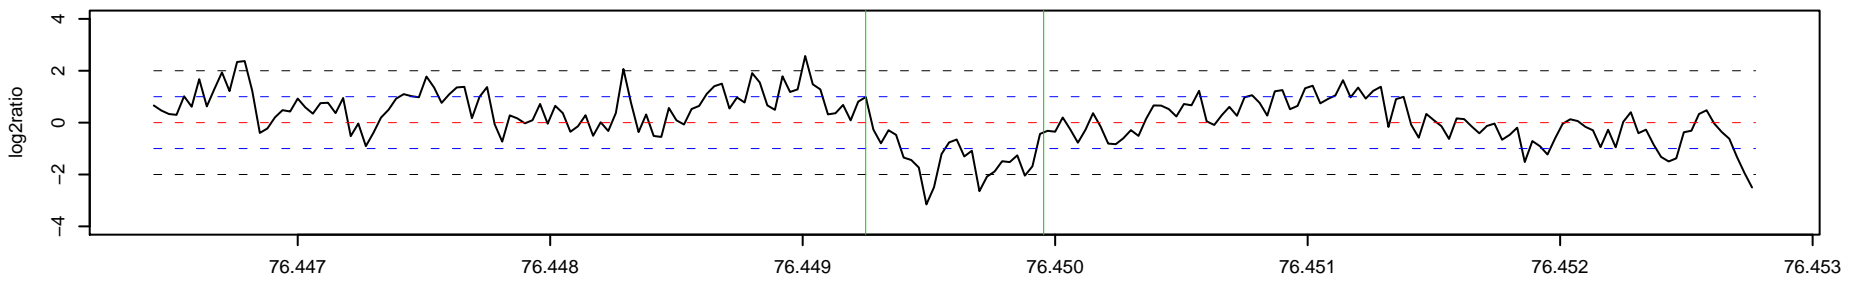

614\_AK1 Chr 18 : 5199958 – 5200676 , 719 bp (aCGH relative log2ratio= -2.26 )

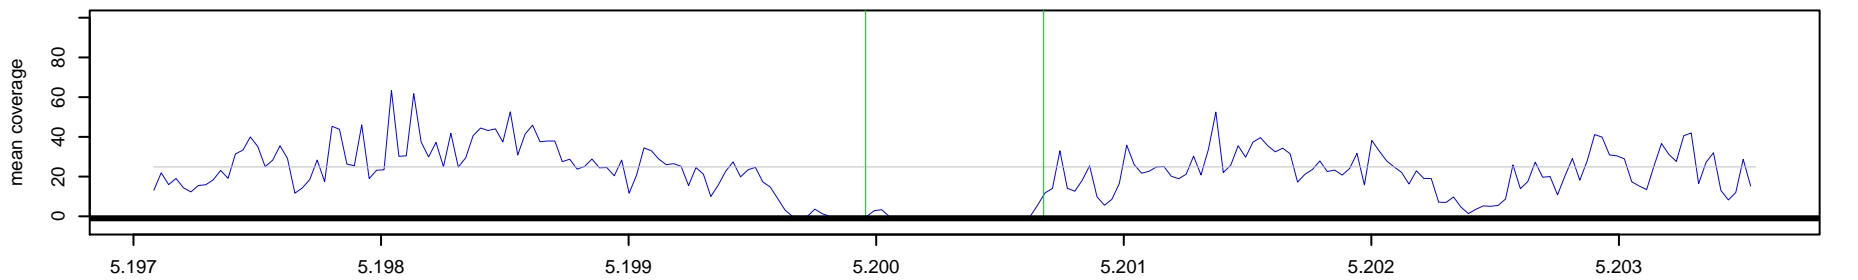

614\_NA10851 Chr 18 : 5199958 – 5200676 , 719 bp (aCGH relative log2ratio= -2.26 )

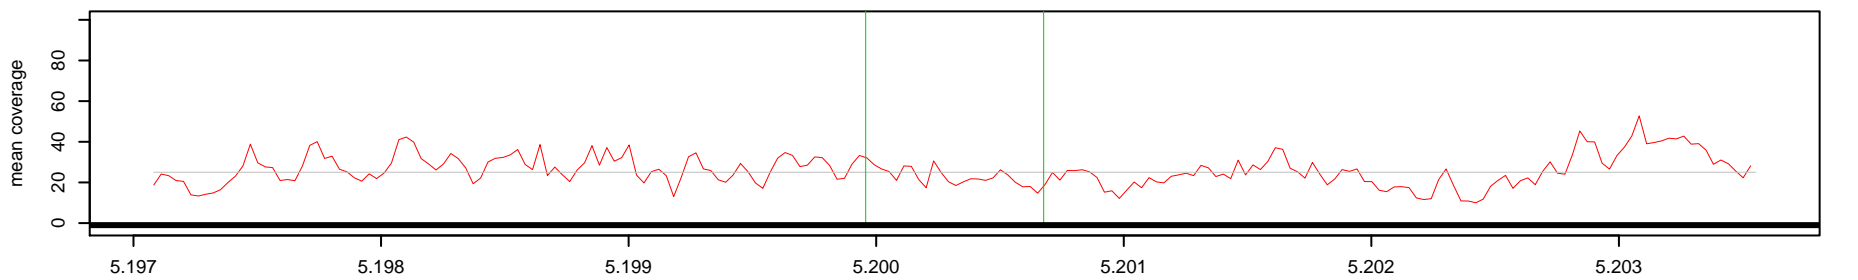

Log2( AK1 read depth / NA10851 read depth)

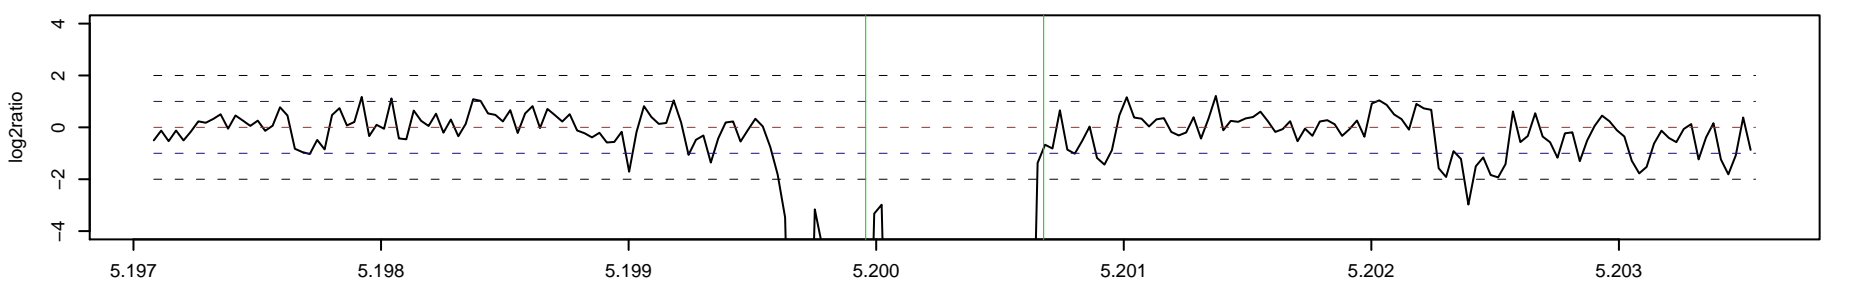

615\_AK1 Chr 18 : 7134373 – 7136632 , 2260 bp (aCGH relative log2ratio= 1.04 )

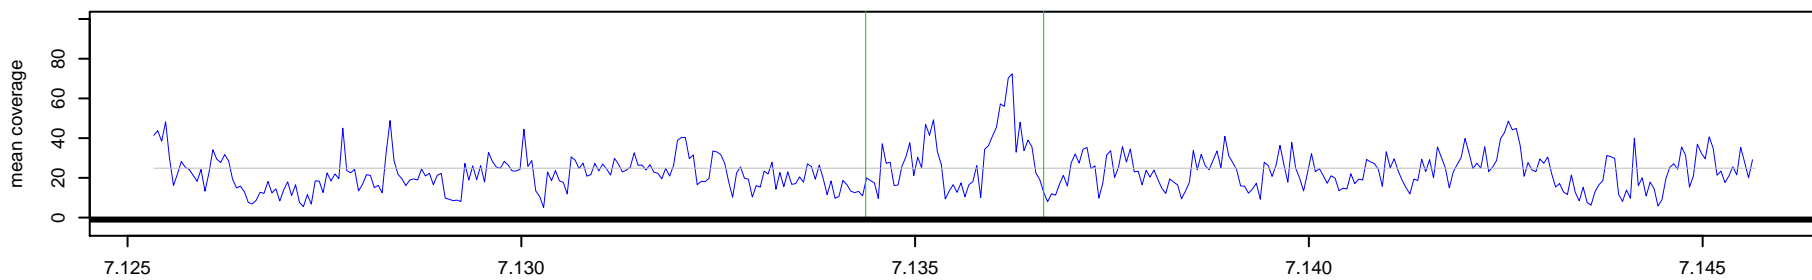

615\_NA10851 Chr 18 : 7134373 – 7136632 , 2260 bp (aCGH relative log2ratio= 1.04 )

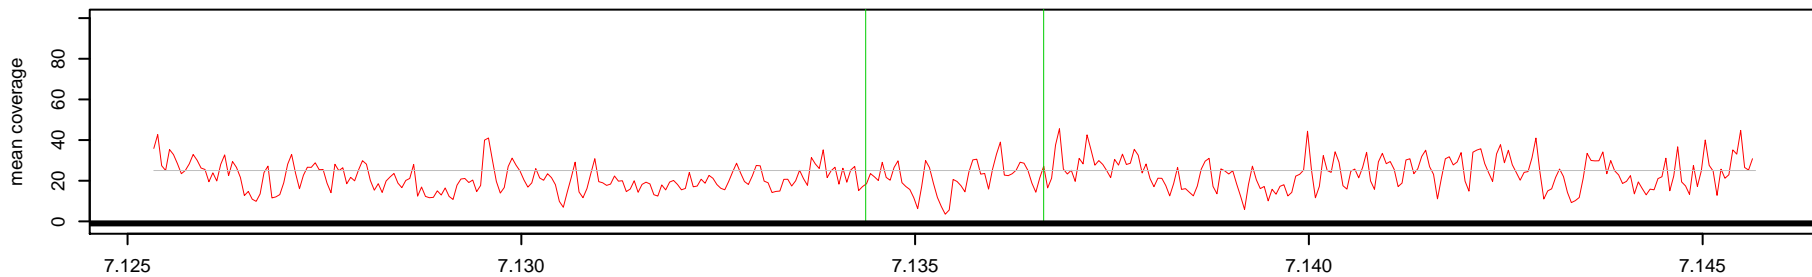

Log2( AK1 read depth / NA10851 read depth)

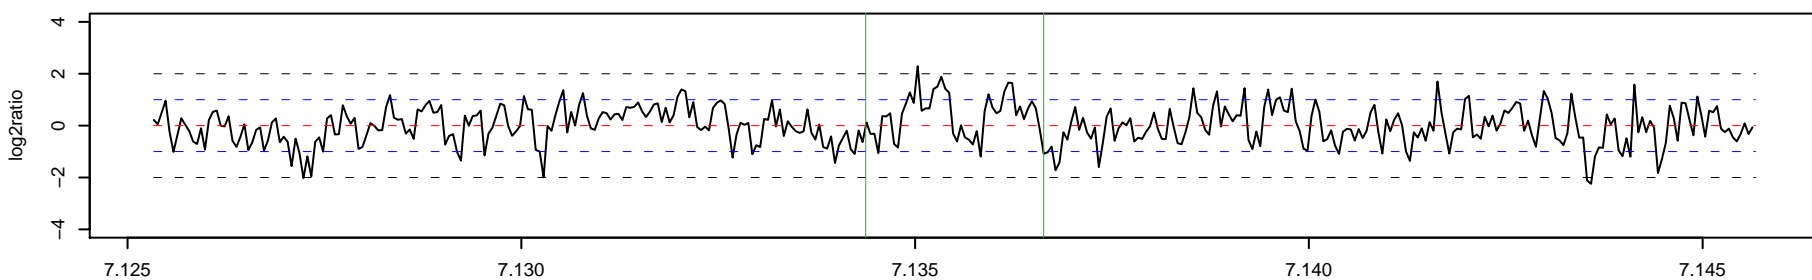

616\_AK1 Chr 18 : 28142158 – 28143441 , 1284 bp (aCGH relative log2ratio= 0.57 )

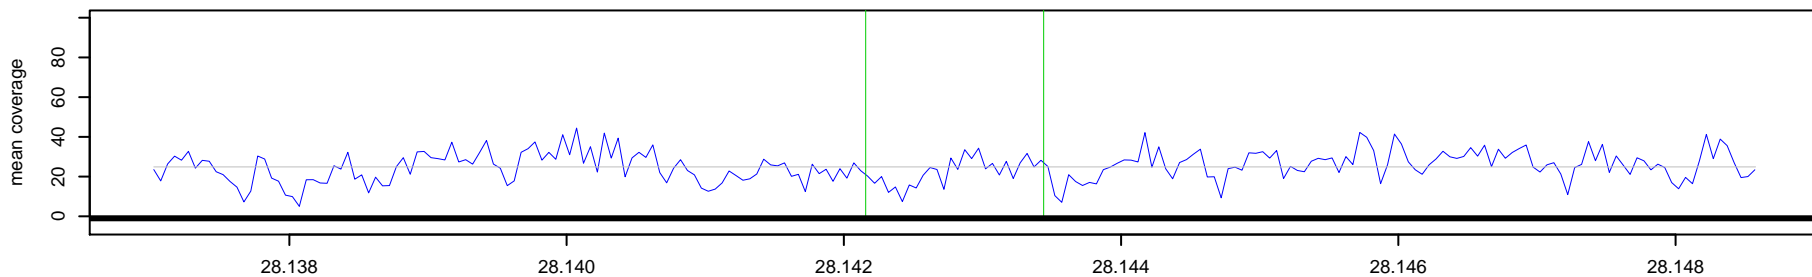

616\_NA10851 Chr 18 : 28142158 – 28143441 , 1284 bp (aCGH relative log2ratio= 0.57 )

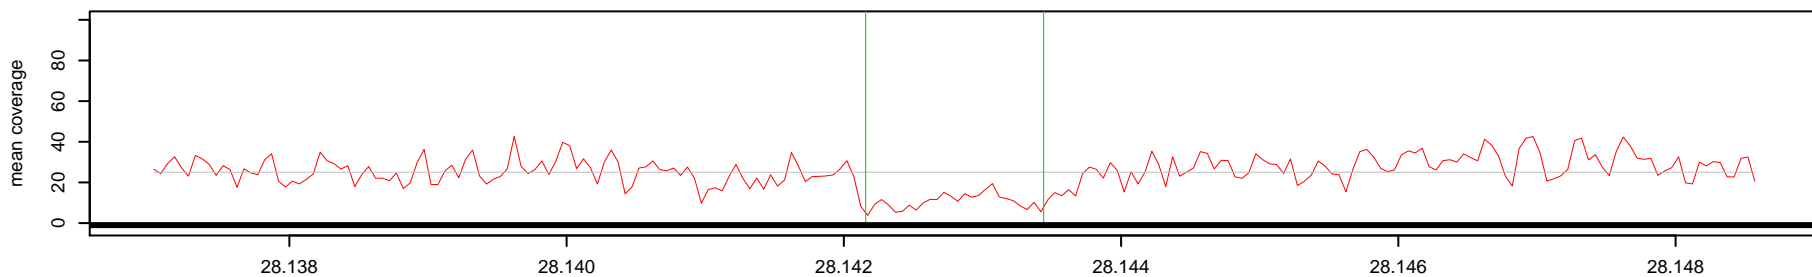

Log2( AK1 read depth / NA10851 read depth)

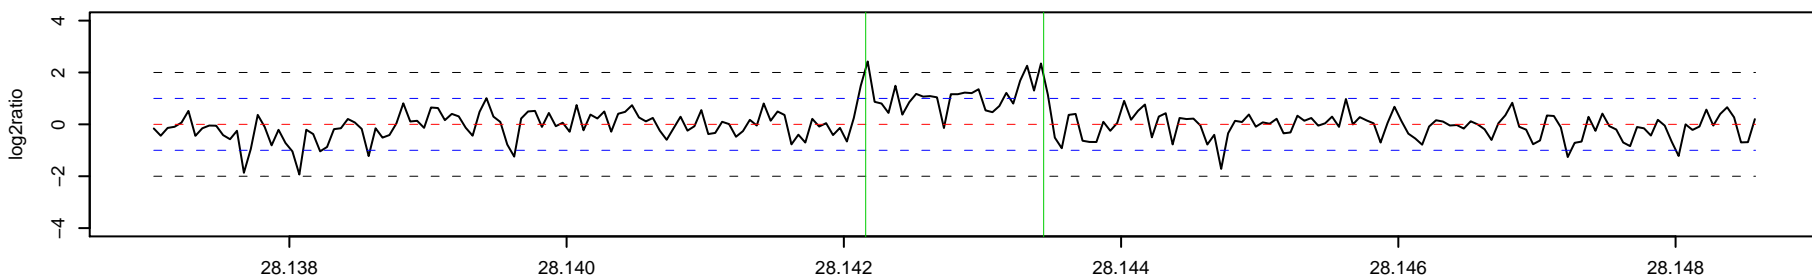



617\_AK1 Chr 18 : 33560039 - 33560600 , 562 bp (aCGH relative log2ratio= -1.22 )

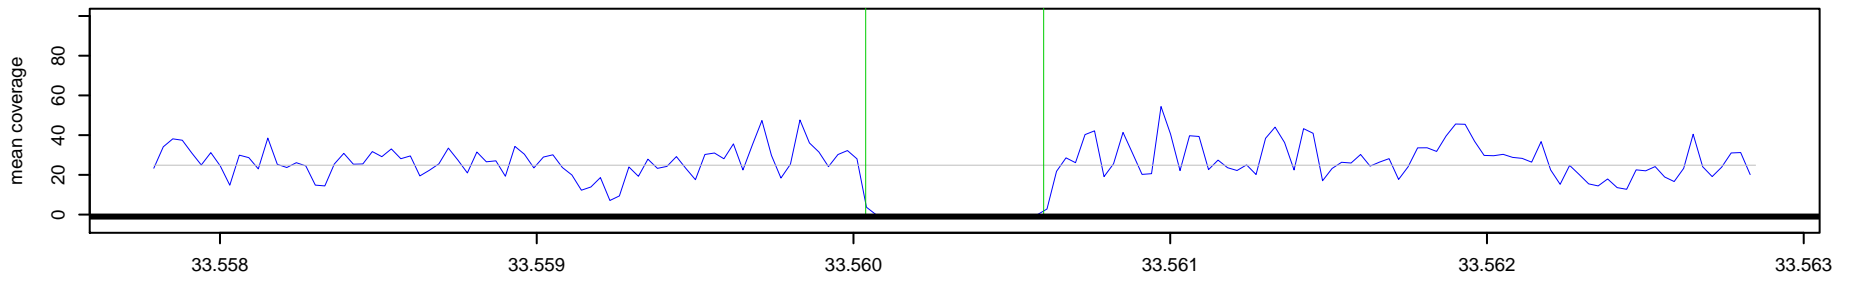

617\_NA10851 Chr 18 : 33560039 - 33560600 , 562 bp (aCGH relative log2ratio= -1.22 )

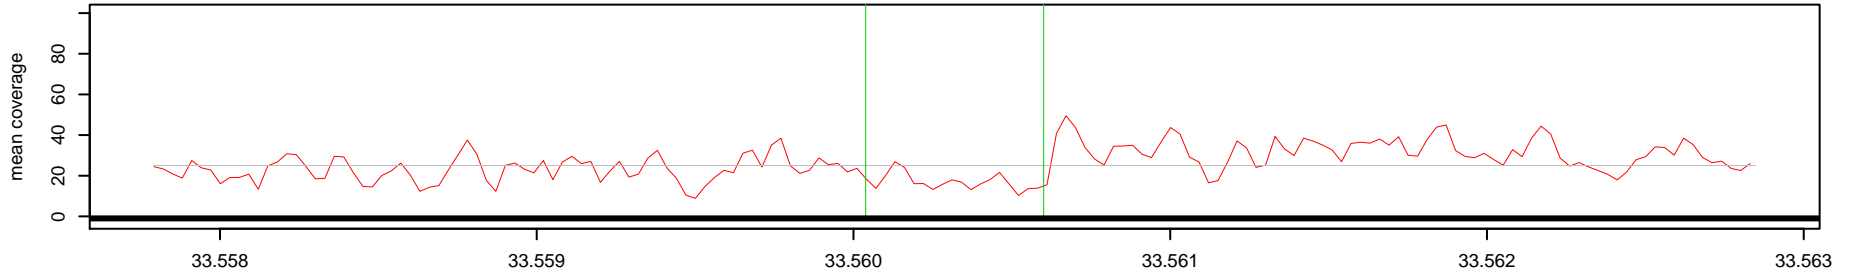

Log2( AK1 read depth / NA10851 read depth)

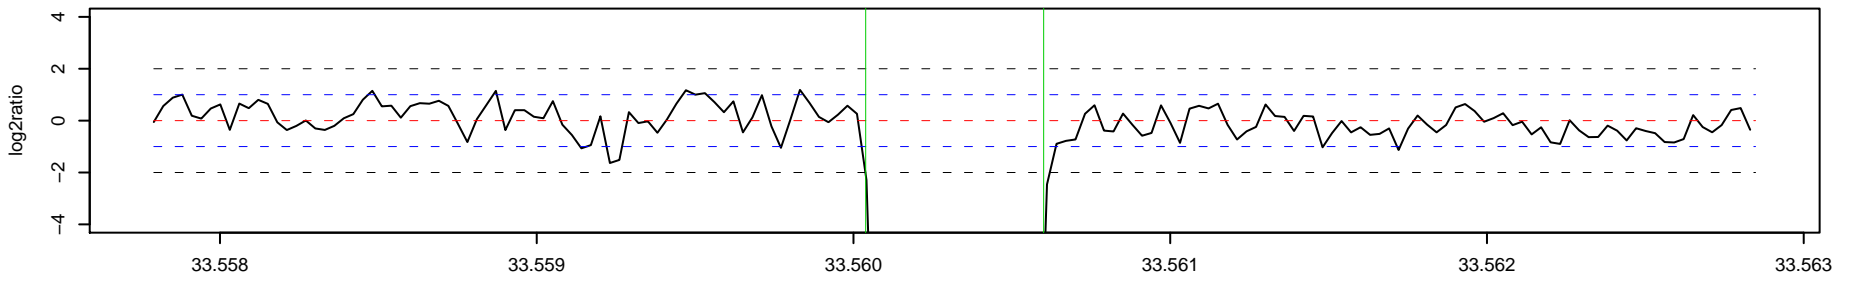

618\_AK1 Chr 18 : 36513834 - 36520654 , 6821 bp (aCGH relative log2ratio= -0.67 )

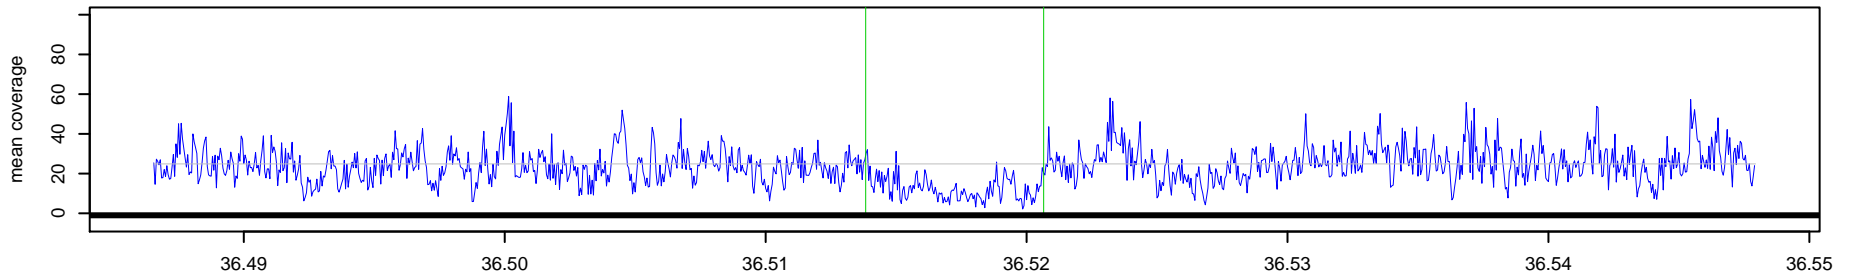

618\_NA10851 Chr 18 : 36513834 - 36520654 , 6821 bp (aCGH relative log2ratio= -0.67 )

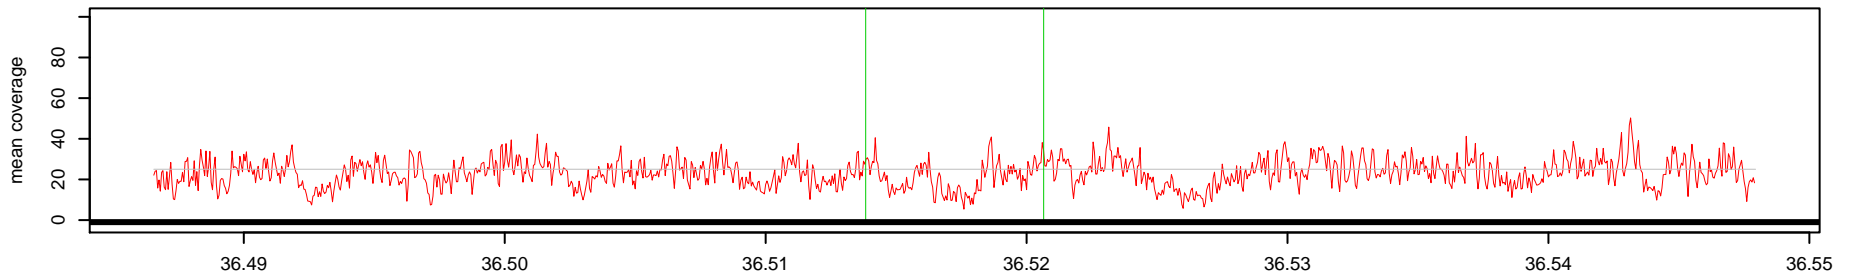

Log2( AK1 read depth / NA10851 read depth)

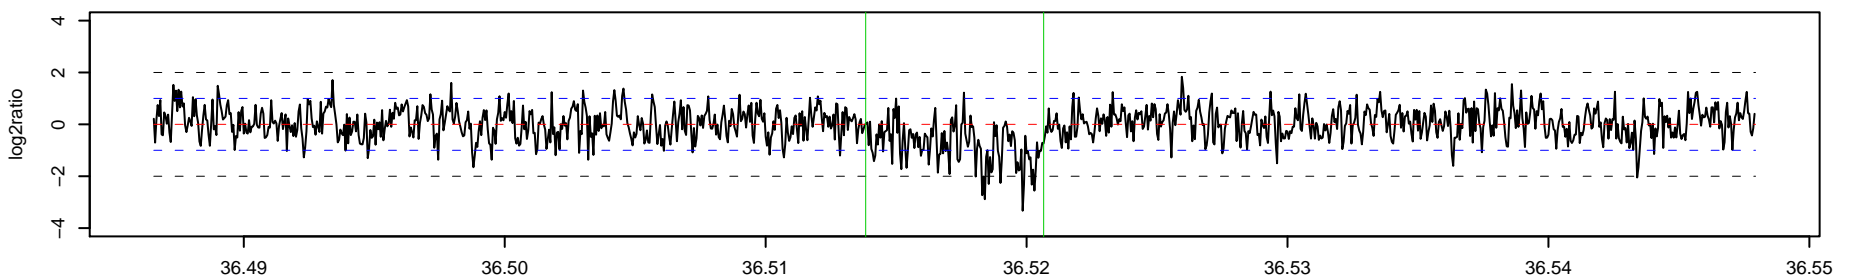

619\_AK1 Chr 18 : 45948975 – 45952515 , 3541 bp (aCGH relative log2ratio= -0.83 )

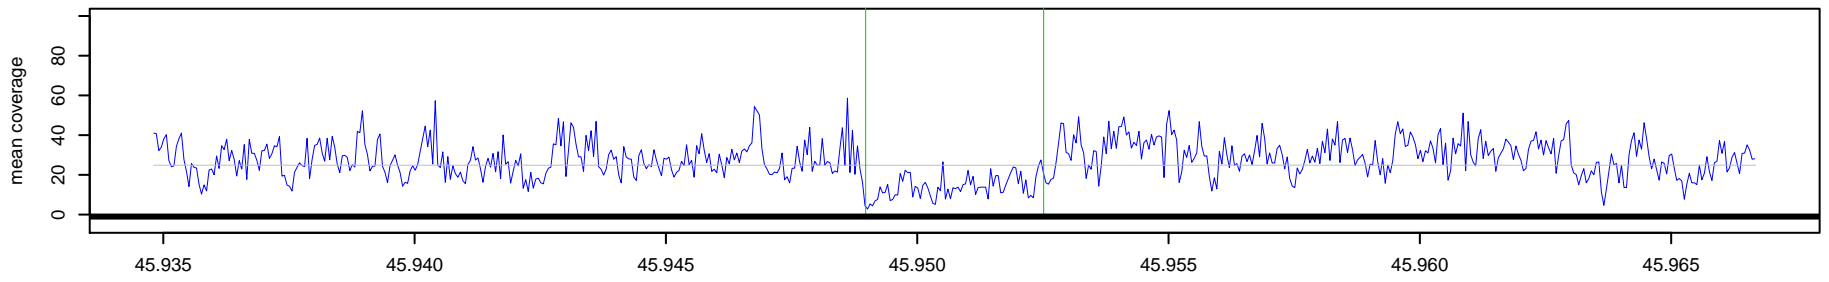

619\_NA10851 Chr 18 : 45948975 – 45952515 , 3541 bp (aCGH relative log2ratio= -0.83 )

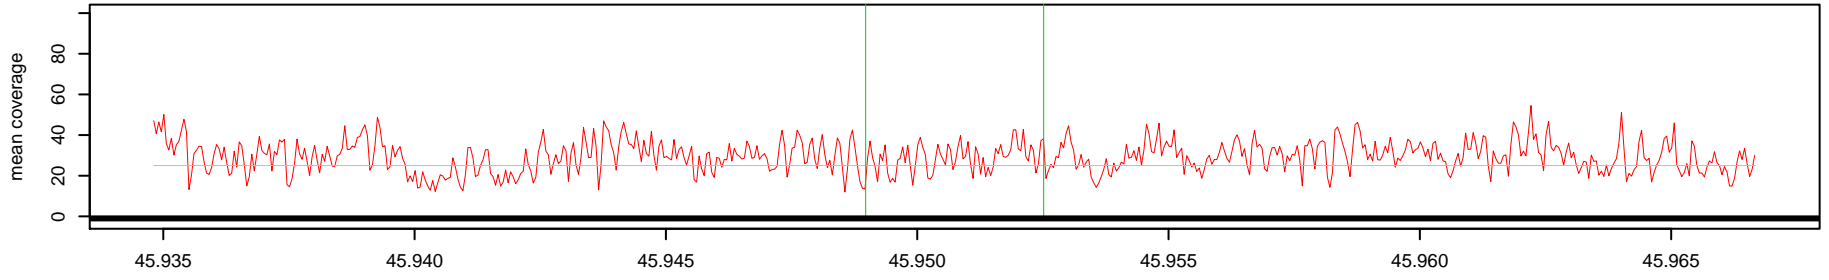

Log2( AK1 read depth / NA10851 read depth)

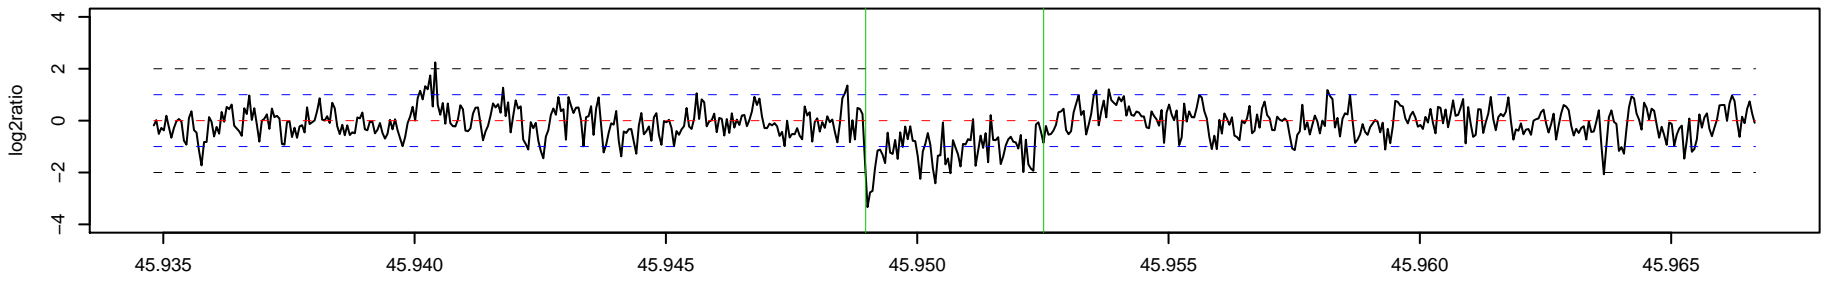

620\_AK1 Chr 18 : 47450842 – 47452251 , 1410 bp (aCGH relative log2ratio= 0.64 )

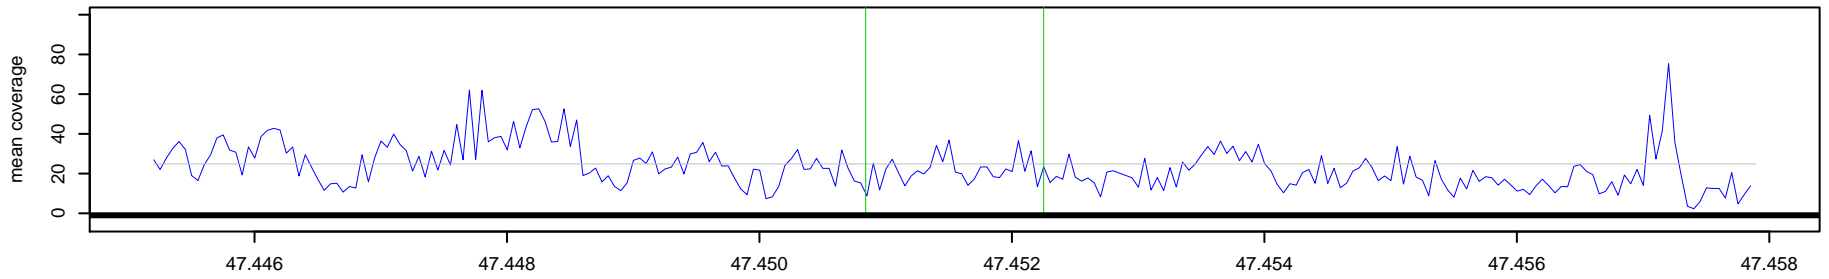

620\_NA10851 Chr 18 : 47450842 – 47452251 , 1410 bp (aCGH relative log2ratio= 0.64 )

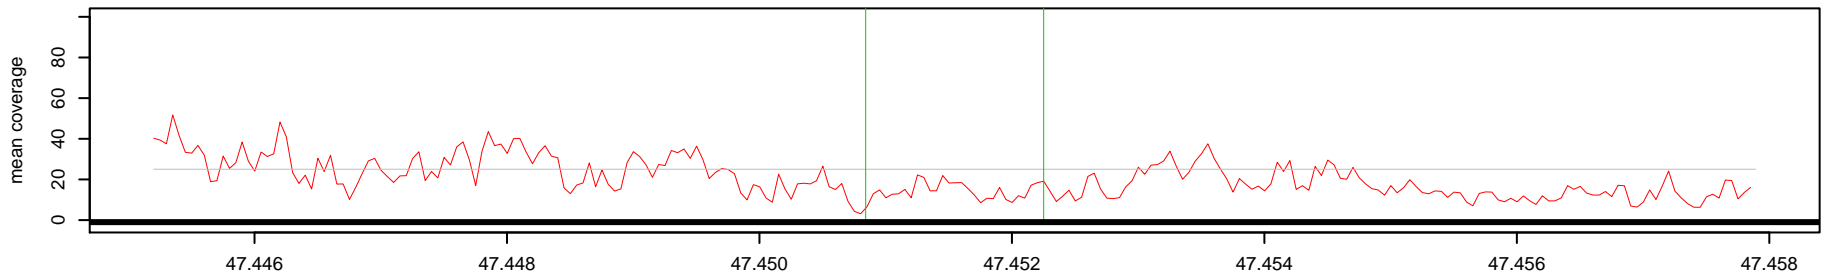

Log2( AK1 read depth / NA10851 read depth)

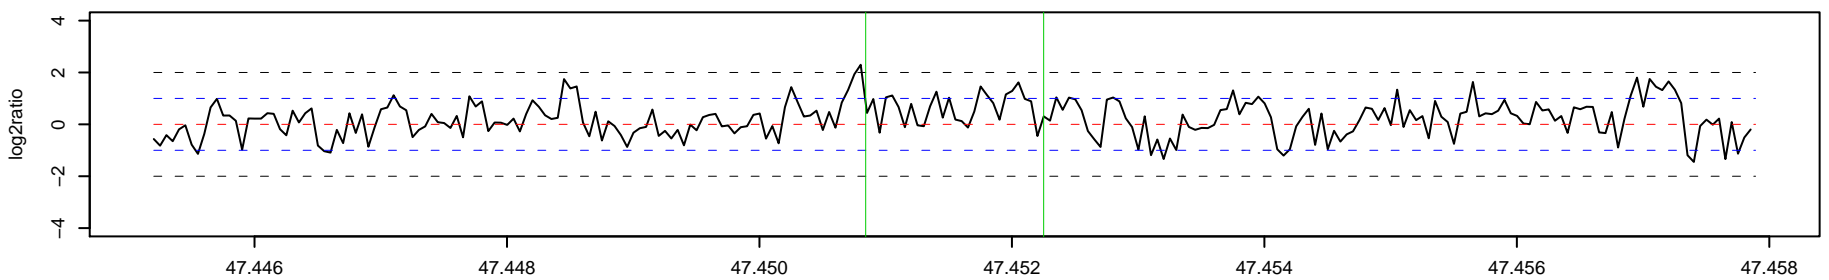

621 \_ AK1 Chr 18 : 48716529 – 48717047 , 519 bp (aCGH relative log2ratio= -2.66 )

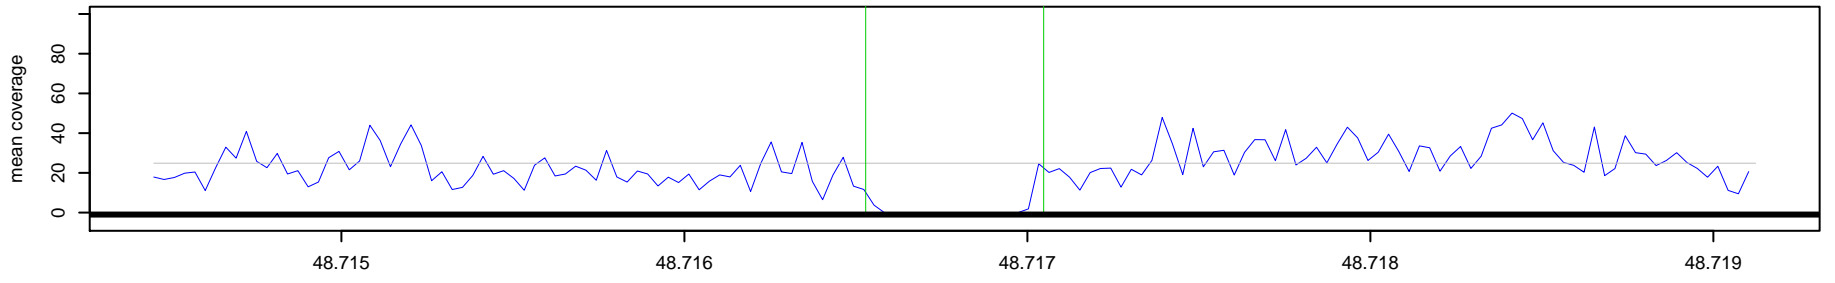

621 \_ NA10851 Chr 18 : 48716529 – 48717047 , 519 bp (aCGH relative log2ratio= -2.66 )

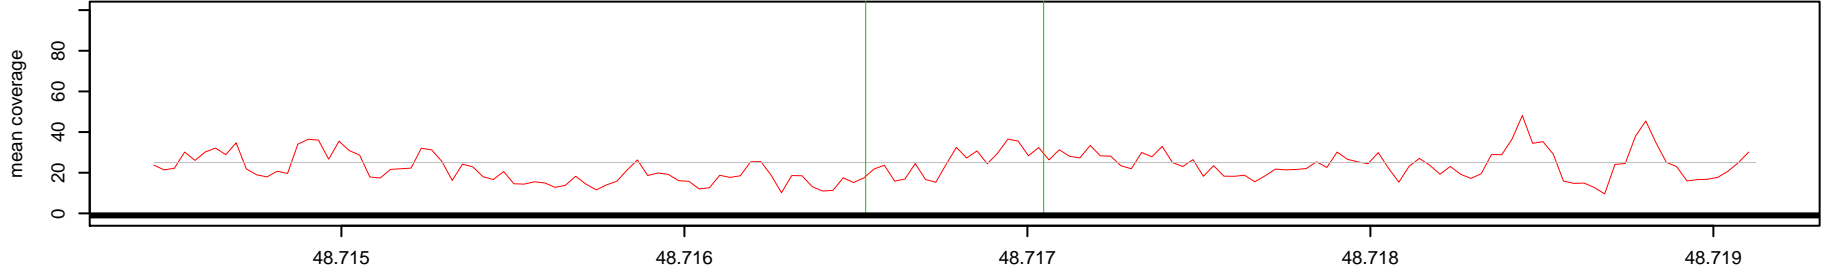

Log2( AK1 read depth / NA10851 read depth)

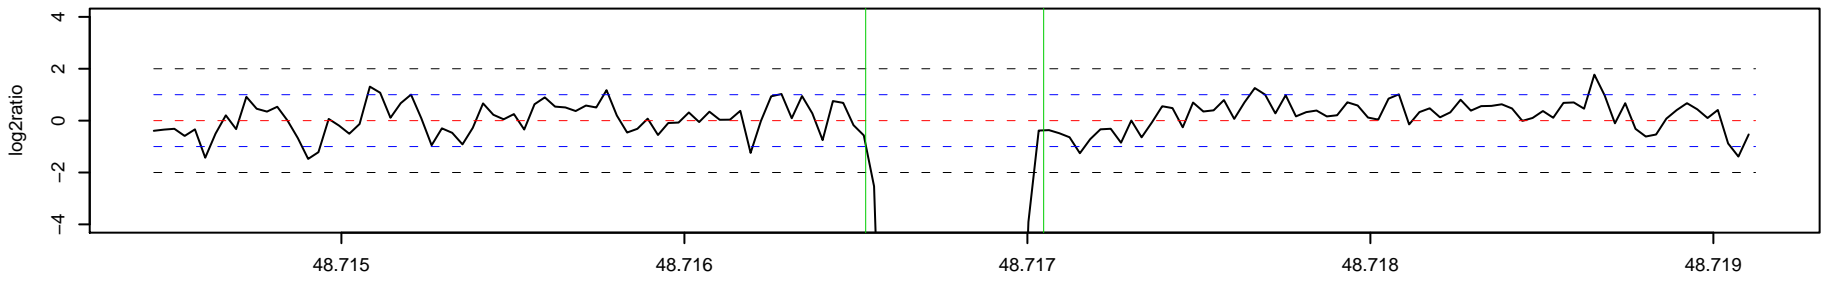

622 \_ AK1 Chr 18 : 49390426 – 49391842 , 1417 bp (aCGH relative log2ratio= 0.75 )

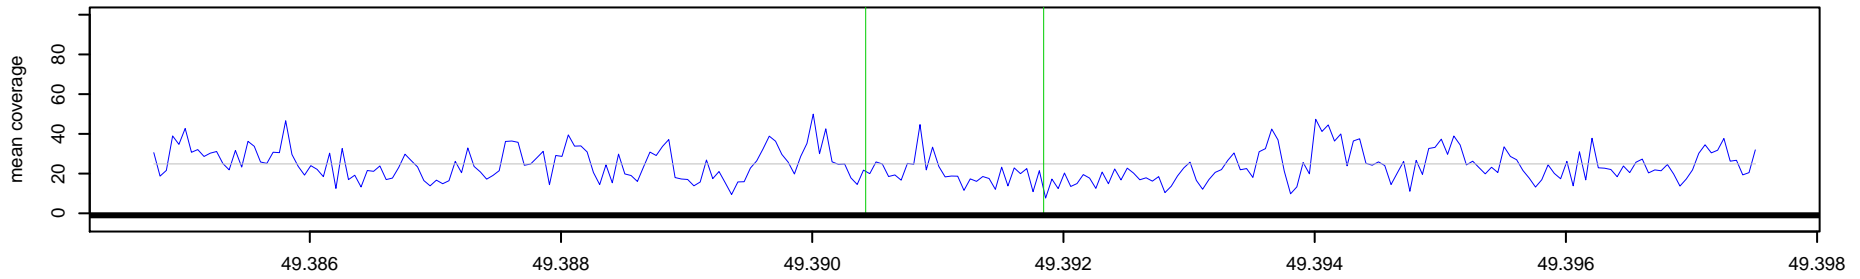

622 \_ NA10851 Chr 18 : 49390426 – 49391842 , 1417 bp (aCGH relative log2ratio= 0.75 )

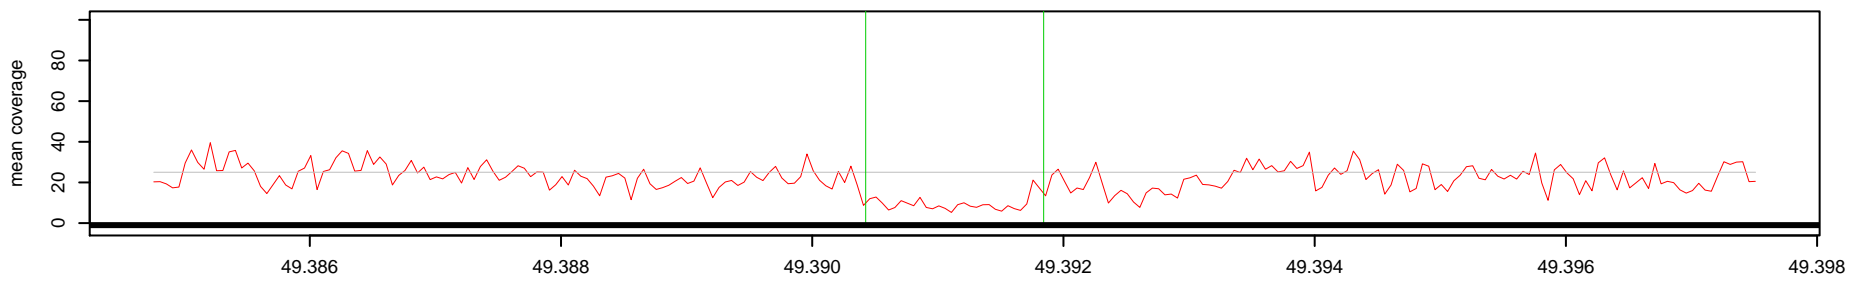

Log2( AK1 read depth / NA10851 read depth)

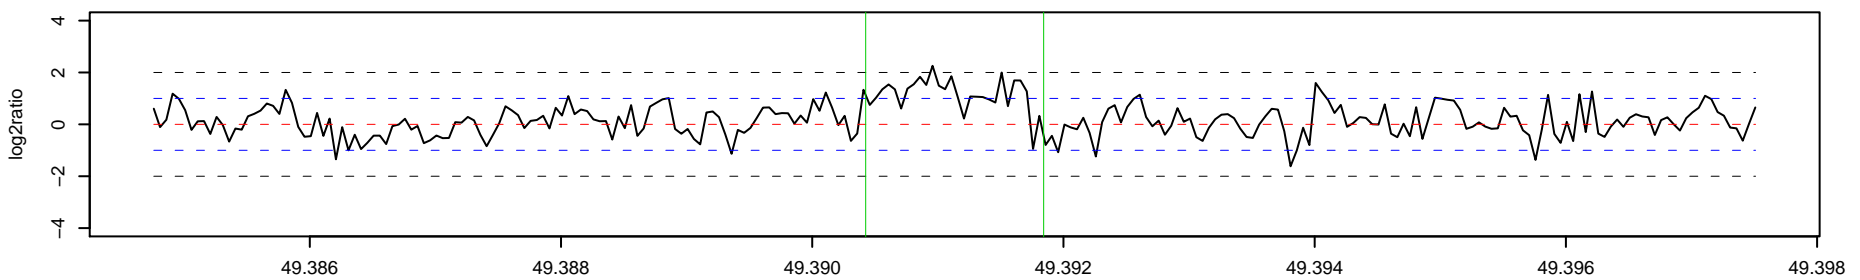

623\_AK1 Chr 18 : 49459914 – 49464554 , 4641 bp (aCGH relative log2ratio= 0.68 )

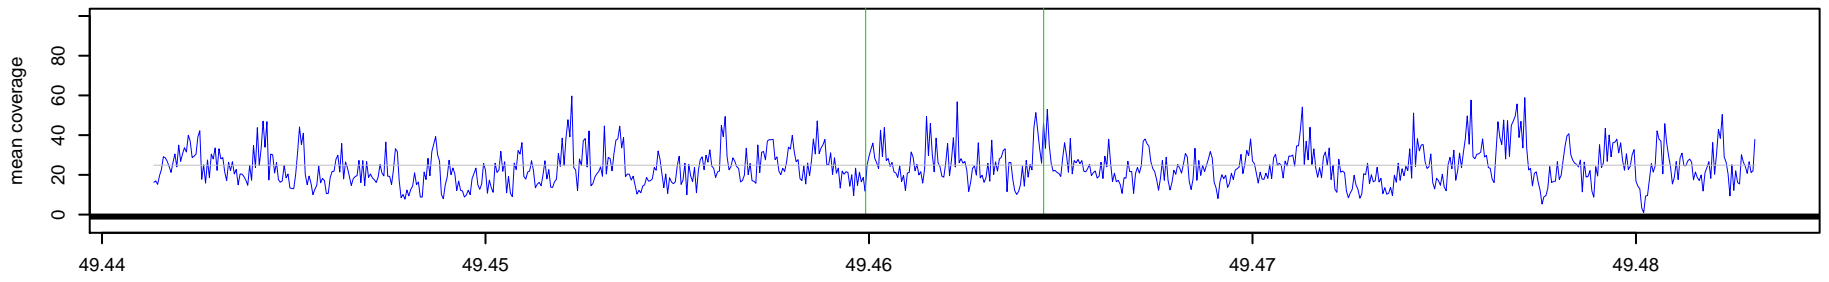

623\_NA10851 Chr 18 : 49459914 – 49464554 , 4641 bp (aCGH relative log2ratio= 0.68 )

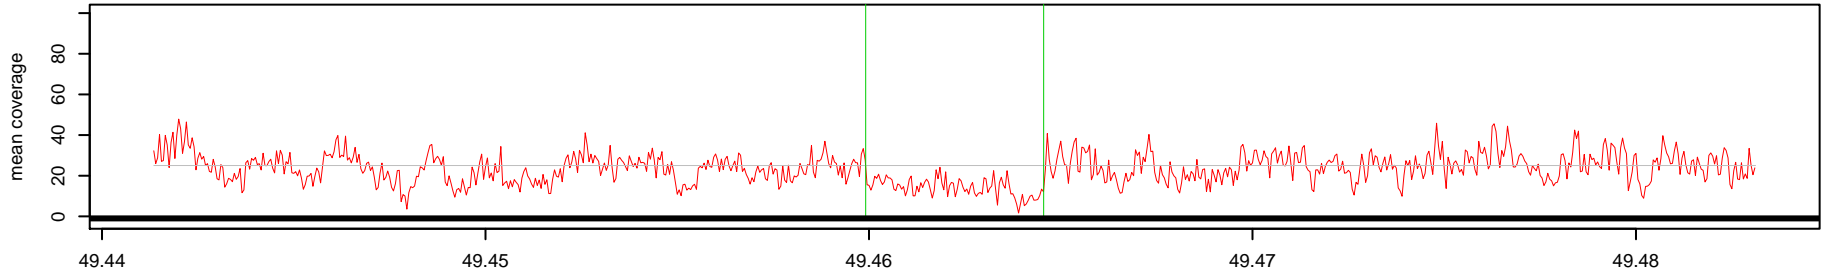

Log2( AK1 read depth / NA10851 read depth)

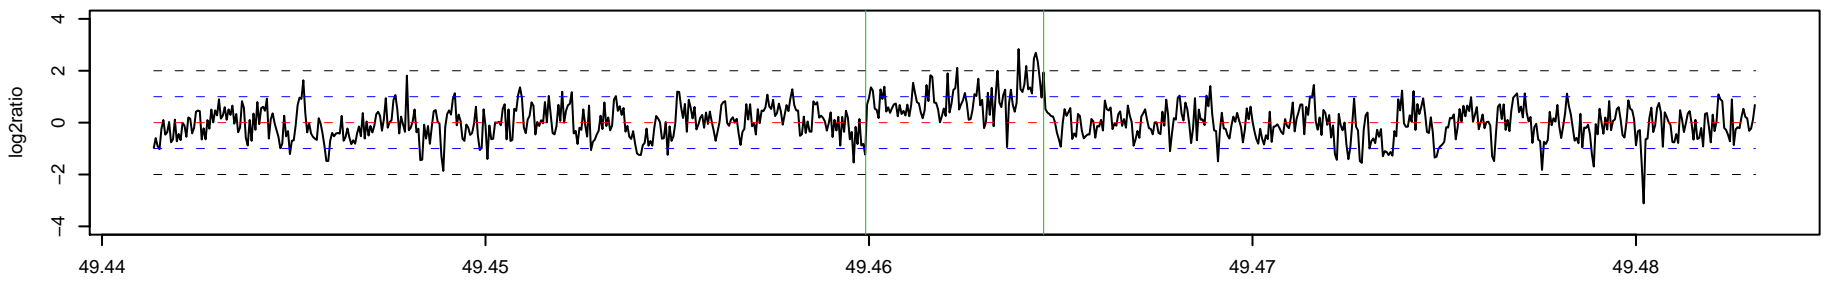

624\_AK1 Chr 18 : 53098115 – 53099769 , 1655 bp (aCGH relative log2ratio= -1.61 )

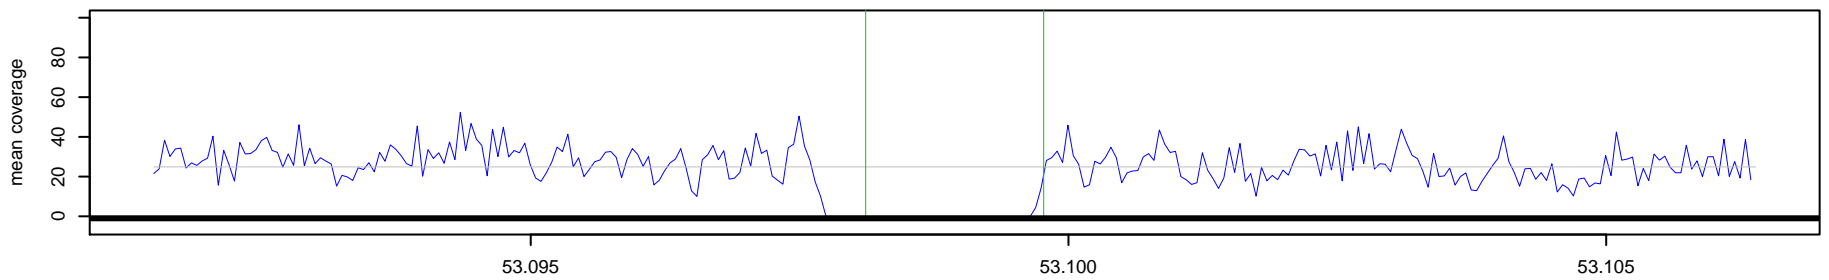

624\_NA10851 Chr 18 : 53098115 – 53099769 , 1655 bp (aCGH relative log2ratio= -1.61 )

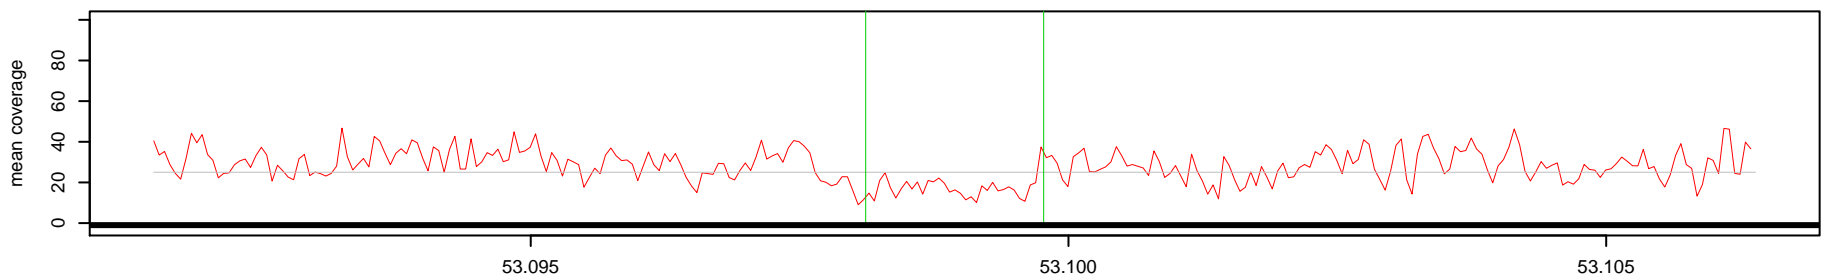

Log2( AK1 read depth / NA10851 read depth)

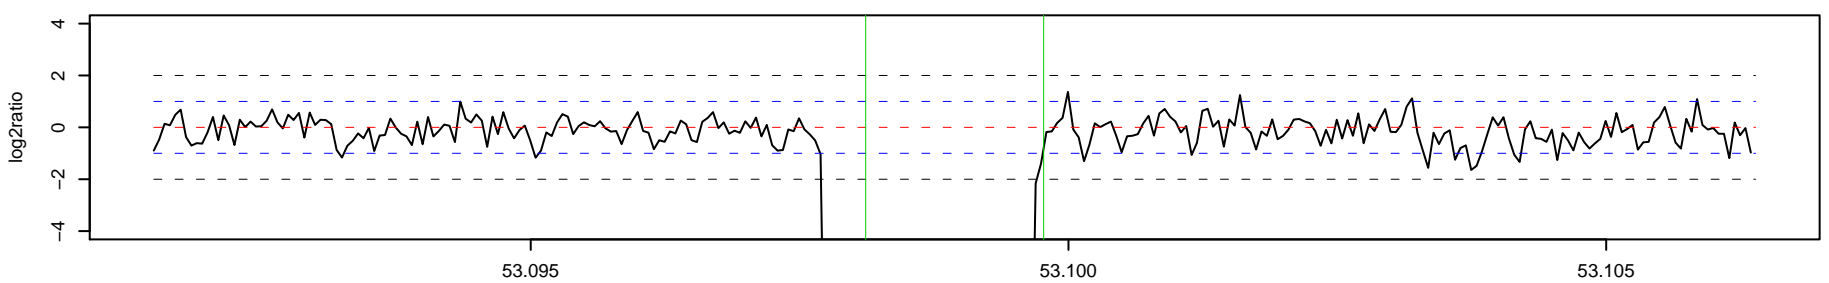

625\_AK1 Chr 18 : 61917859 – 61920141 , 2283 bp (aCGH relative log2ratio= 1.20 )

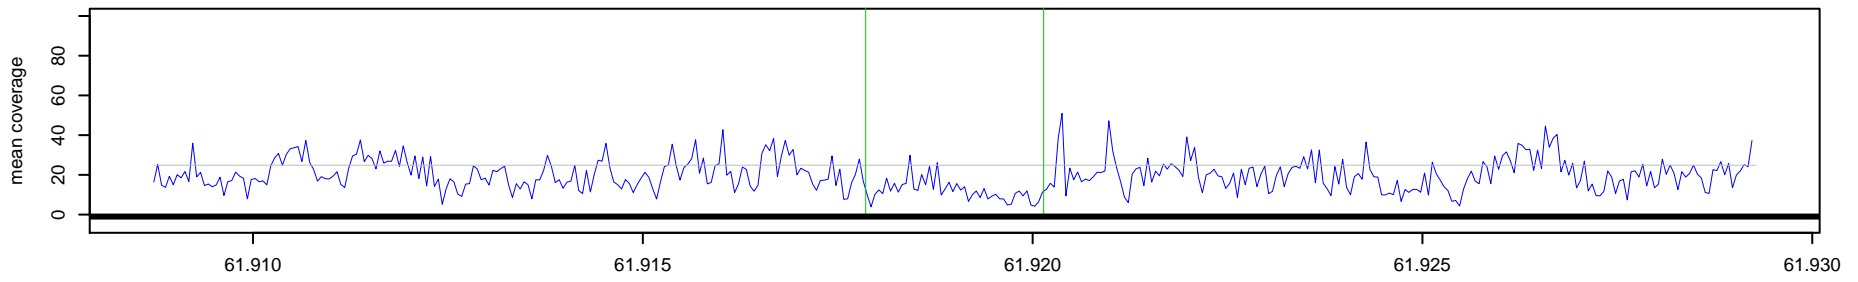

625\_NA10851 Chr 18 : 61917859 – 61920141 , 2283 bp (aCGH relative log2ratio= 1.20 )

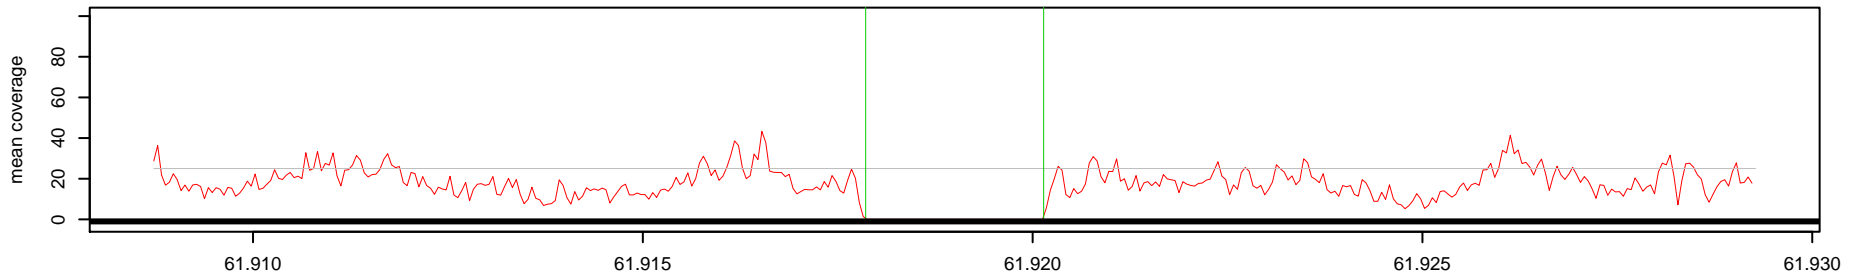

Log2( AK1 read depth / NA10851 read depth)

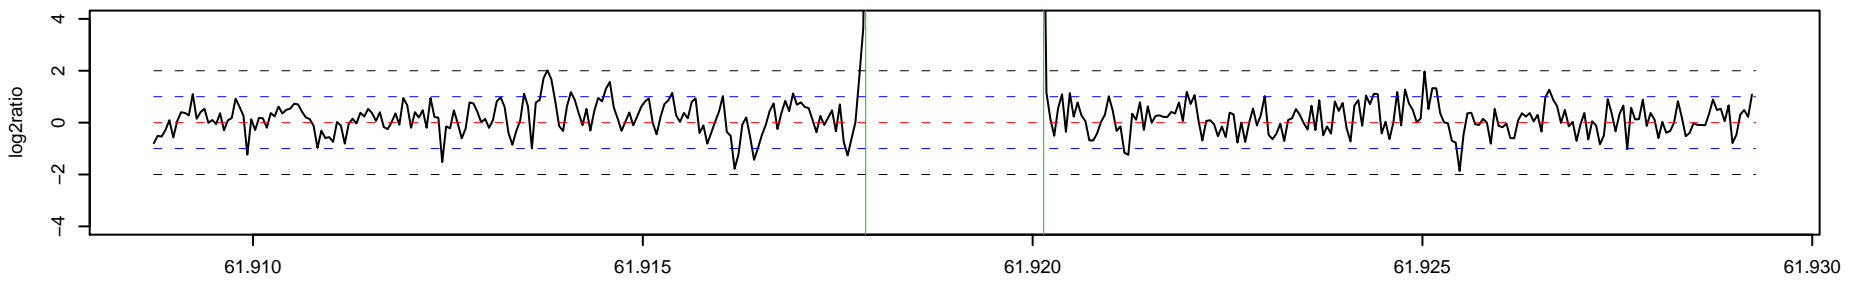

626\_AK1 Chr 18 : 62370644 – 62372061 , 1418 bp (aCGH relative log2ratio= 0.76 )

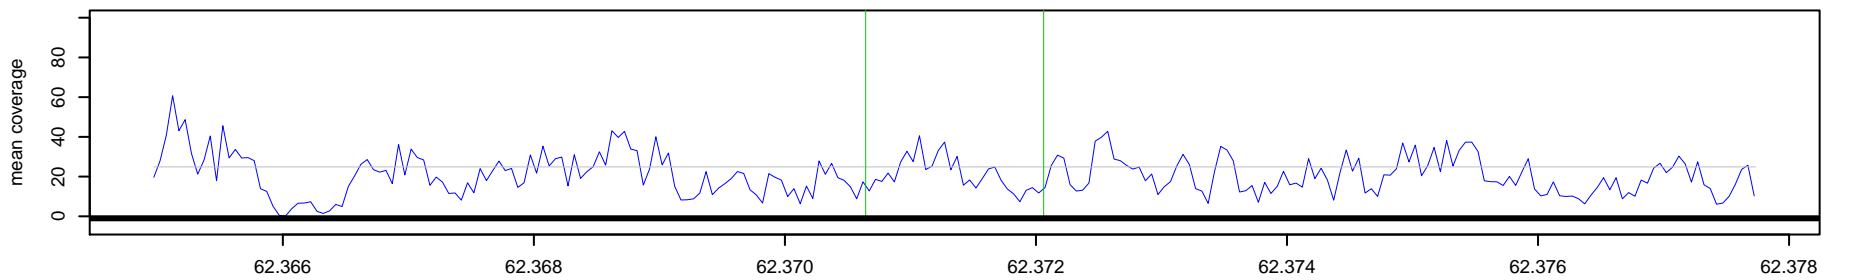

626\_NA10851 Chr 18 : 62370644 – 62372061 , 1418 bp (aCGH relative log2ratio= 0.76 )

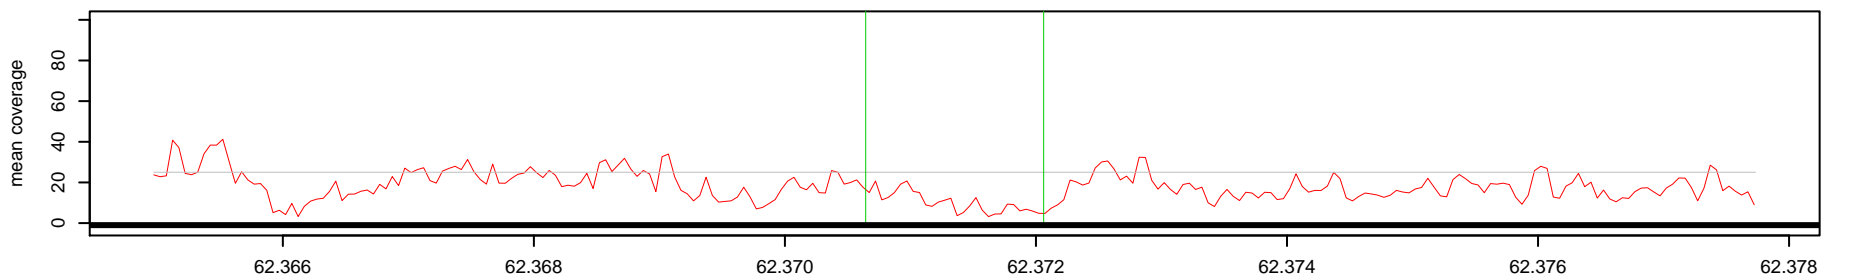

Log2( AK1 read depth / NA10851 read depth)

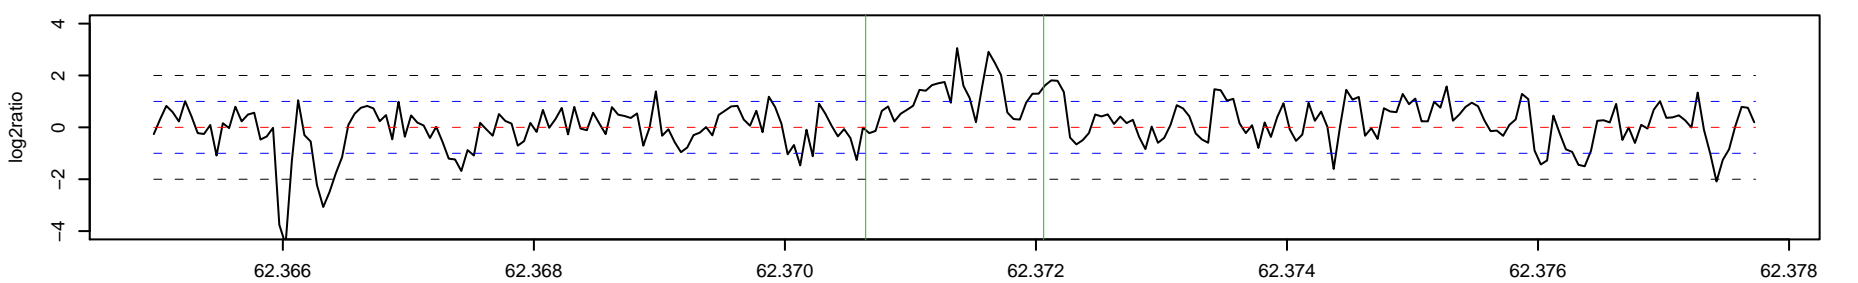

627\_AK1 Chr 18 : 63110021 – 63116264 , 6244 bp (aCGH relative log2ratio= -0.58 )

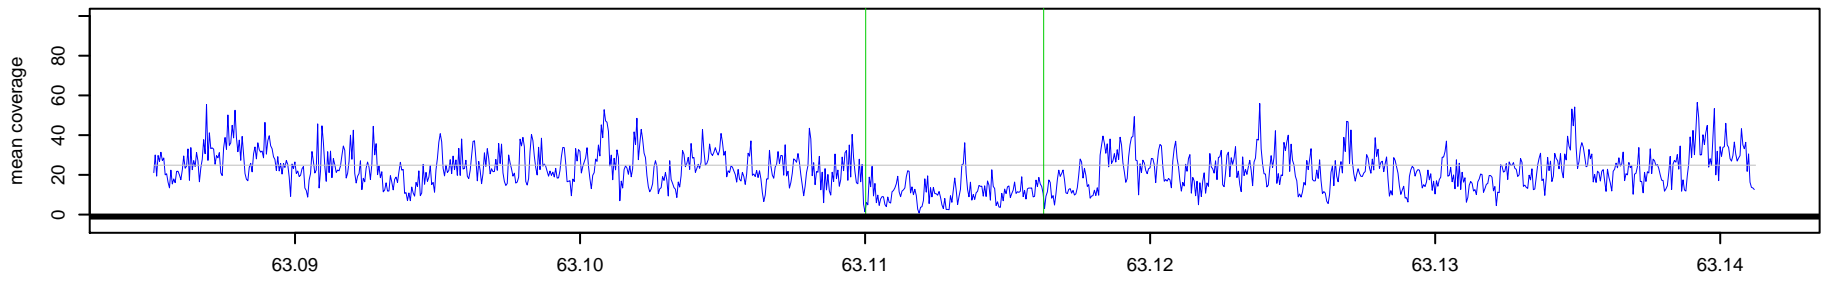

627\_NA10851 Chr 18 : 63110021 – 63116264 , 6244 bp (aCGH relative log2ratio= -0.58 )

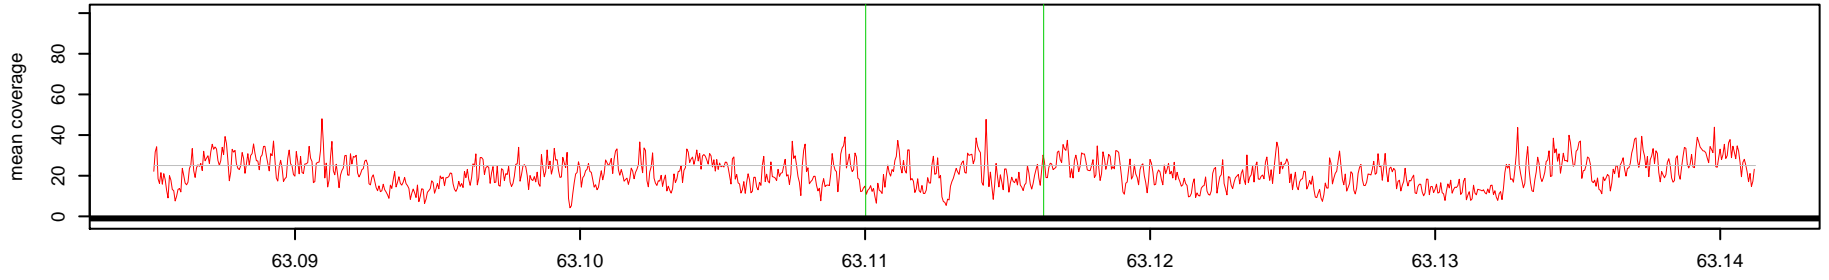

Log2( AK1 read depth / NA10851 read depth)

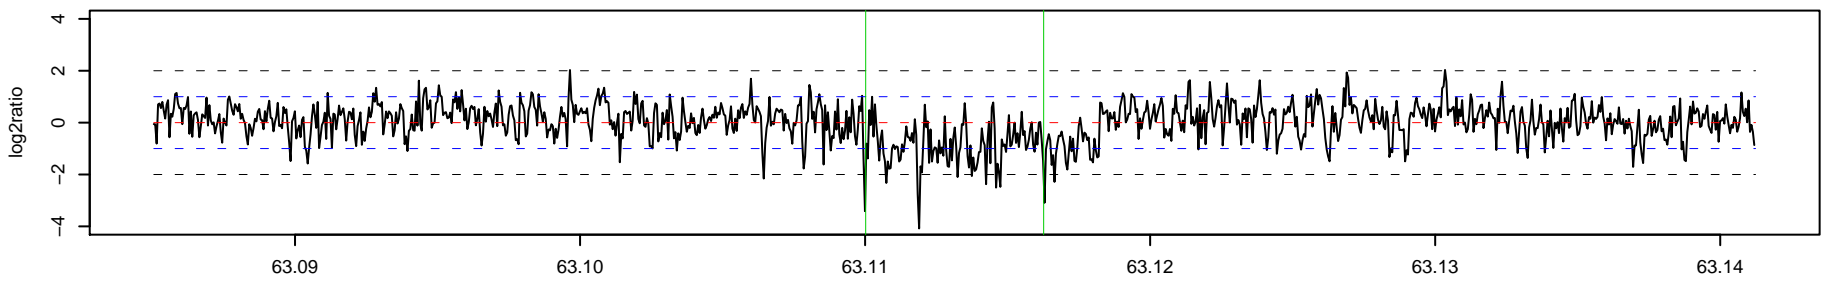

628\_AK1 Chr 18 : 66104549 – 66106280 , 1732 bp (aCGH relative log2ratio= 0.66 )

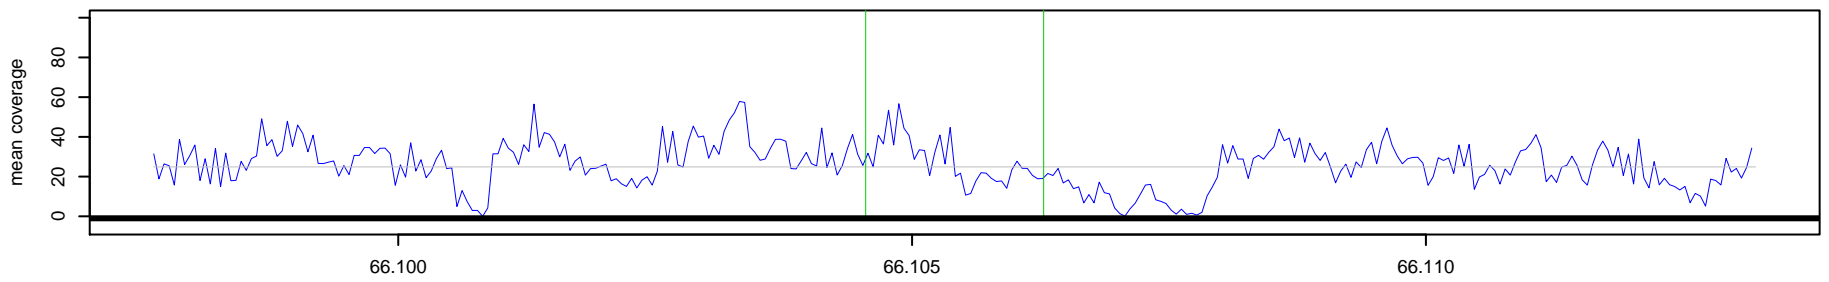

628\_NA10851 Chr 18 : 66104549 – 66106280 , 1732 bp (aCGH relative log2ratio= 0.66 )

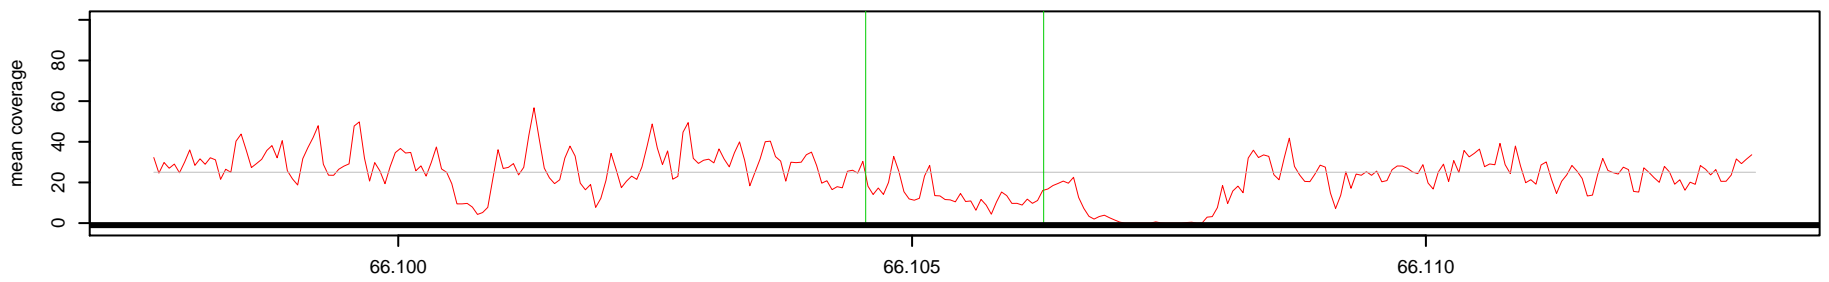

Log2( AK1 read depth / NA10851 read depth)

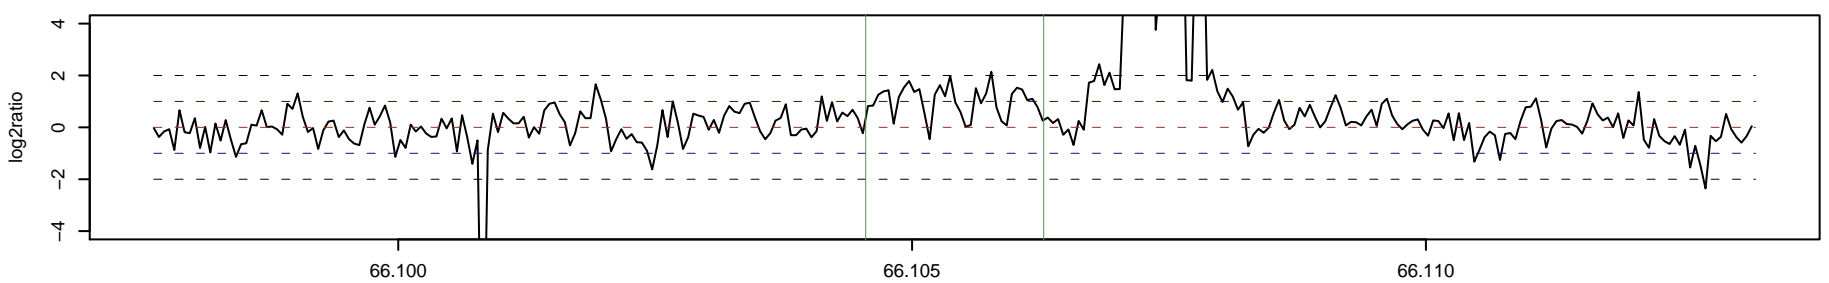

629\_AK1 Chr 18 : 71400398 - 71401133 , 736 bp (aCGH relative log2ratio= 0.58 )

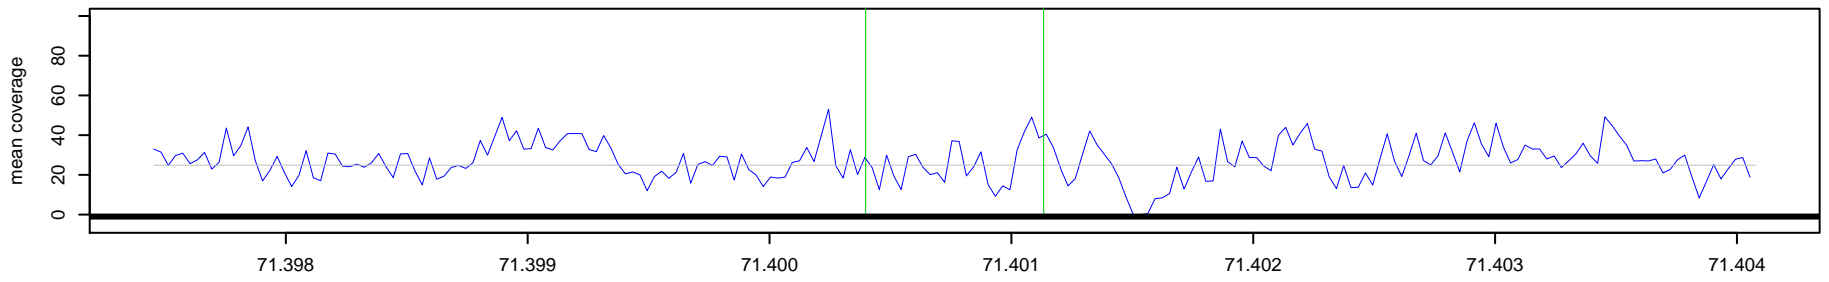

629\_NA10851 Chr 18 : 71400398 - 71401133 , 736 bp (aCGH relative log2ratio= 0.58 )

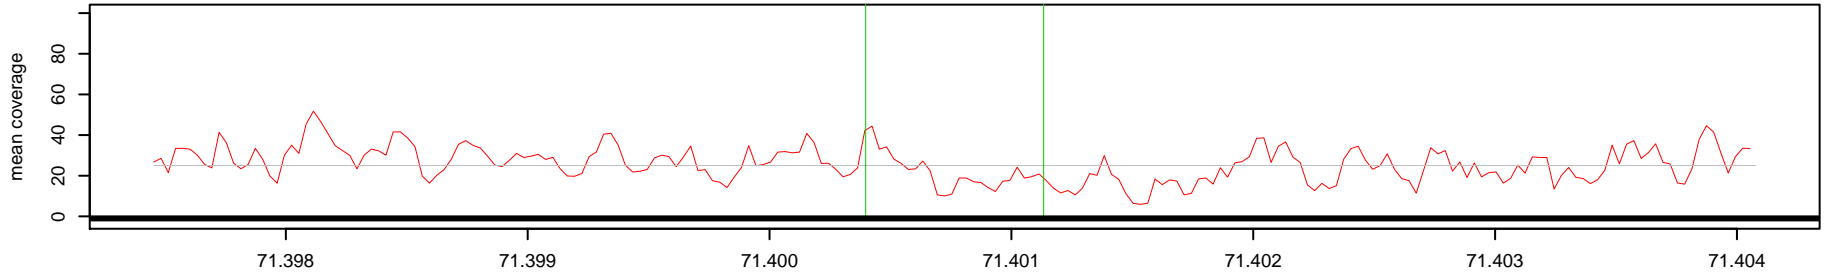

Log2( AK1 read depth / NA10851 read depth)

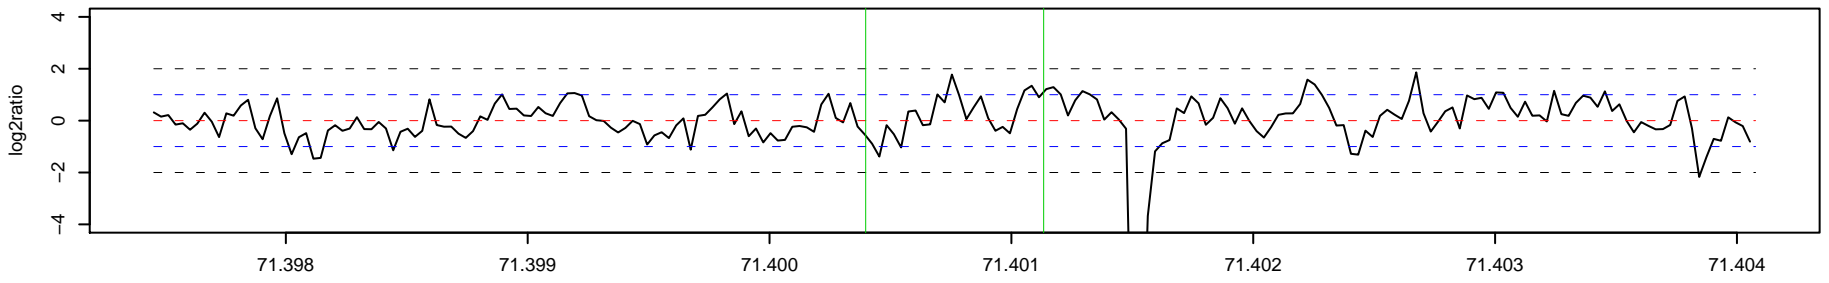

o

o

630\_AK1 Chr 18 : 74439157 - 74439924 , 768 bp (aCGH relative log2ratio= 0.51 )

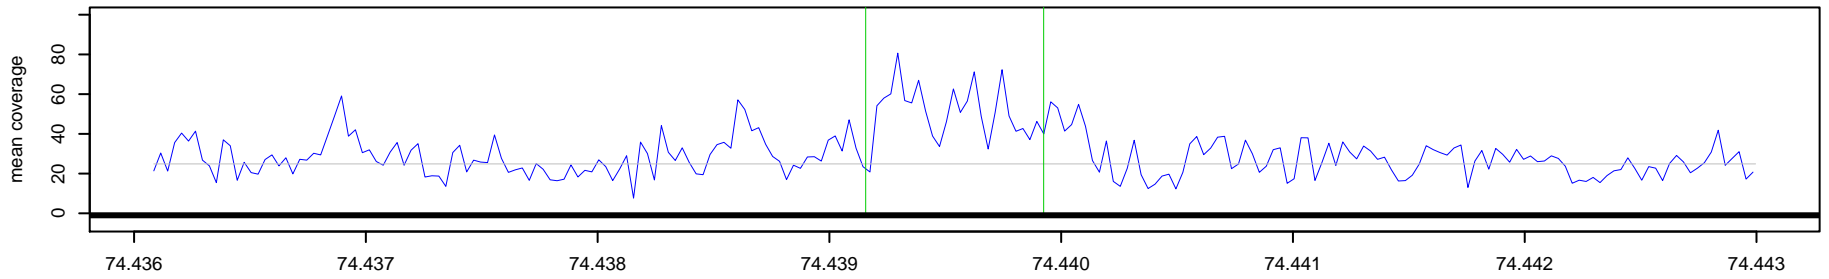

630\_NA10851 Chr 18 : 74439157 - 74439924 , 768 bp (aCGH relative log2ratio= 0.51 )

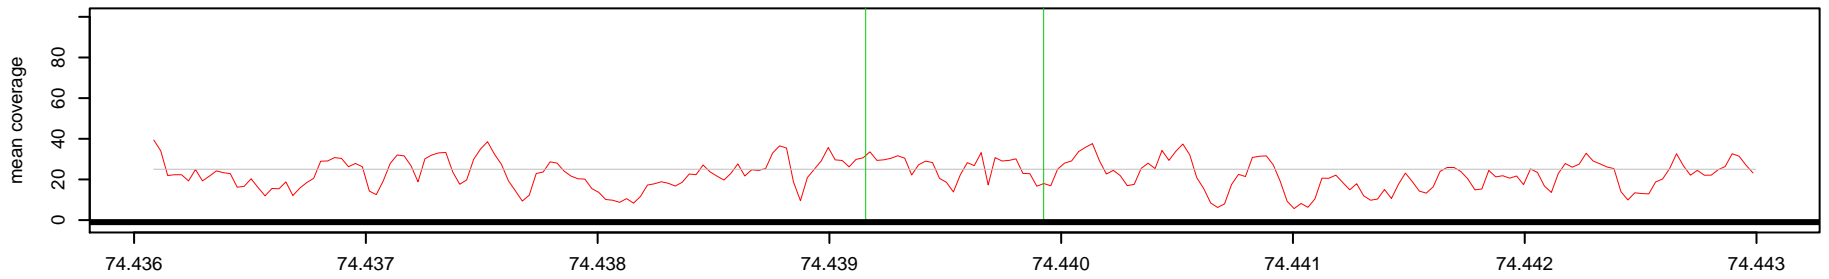

Log2( AK1 read depth / NA10851 read depth)

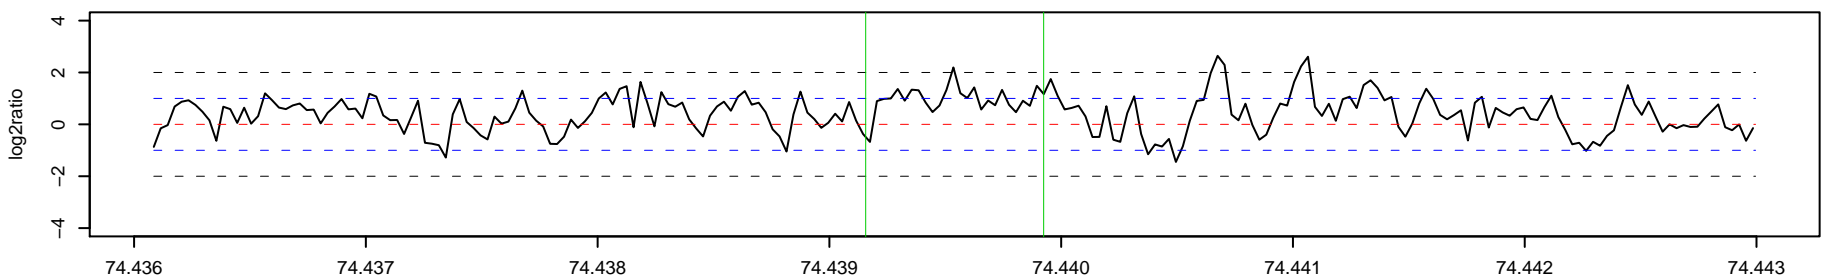

631 \_ AK1 Chr 19 : 10453703 – 10457158 , 3456 bp (aCGH relative log2ratio= -0.95 )

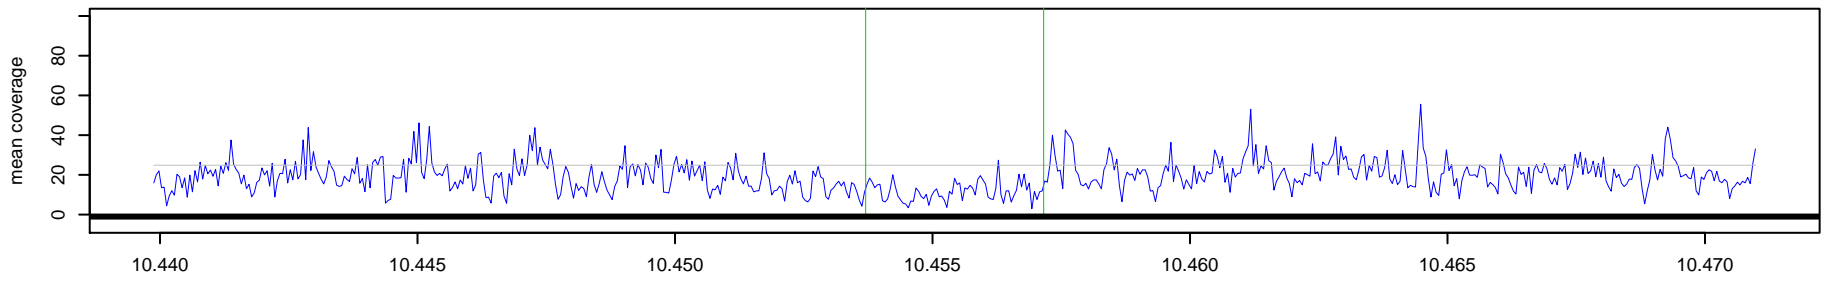

631 \_ NA10851 Chr 19 : 10453703 – 10457158 , 3456 bp (aCGH relative log2ratio= -0.95 )

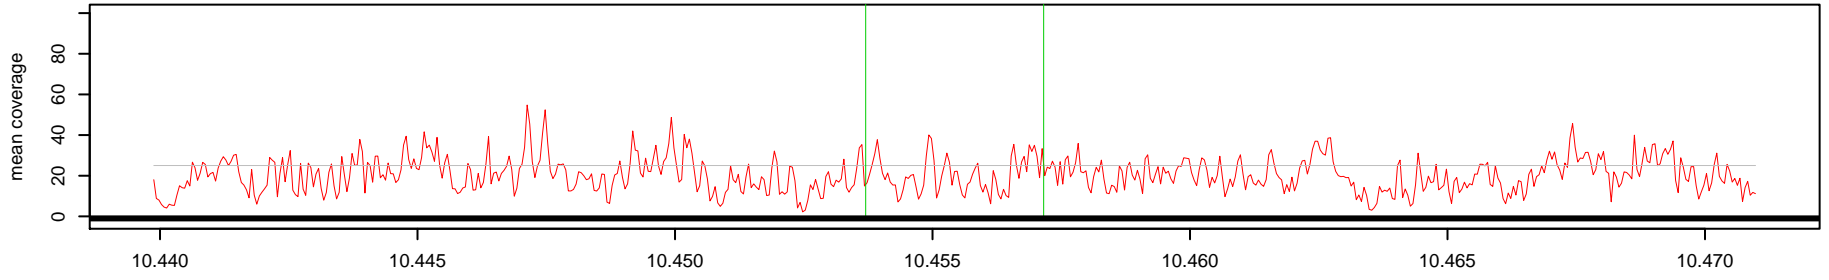

Log2( AK1 read depth / NA10851 read depth)

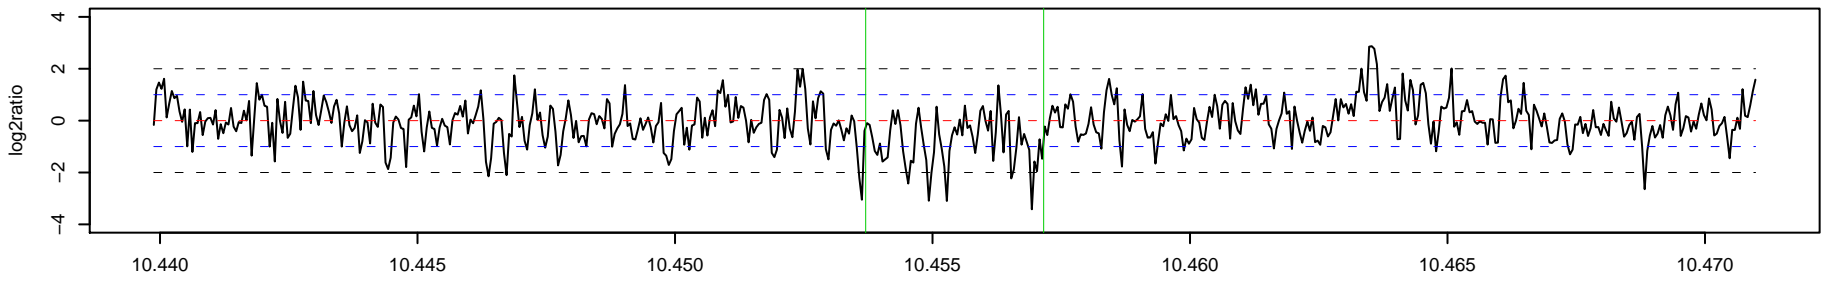

632 \_ AK1 Chr 19 : 12026595 – 12036868 , 10274 bp (aCGH relative log2ratio= -0.63 )

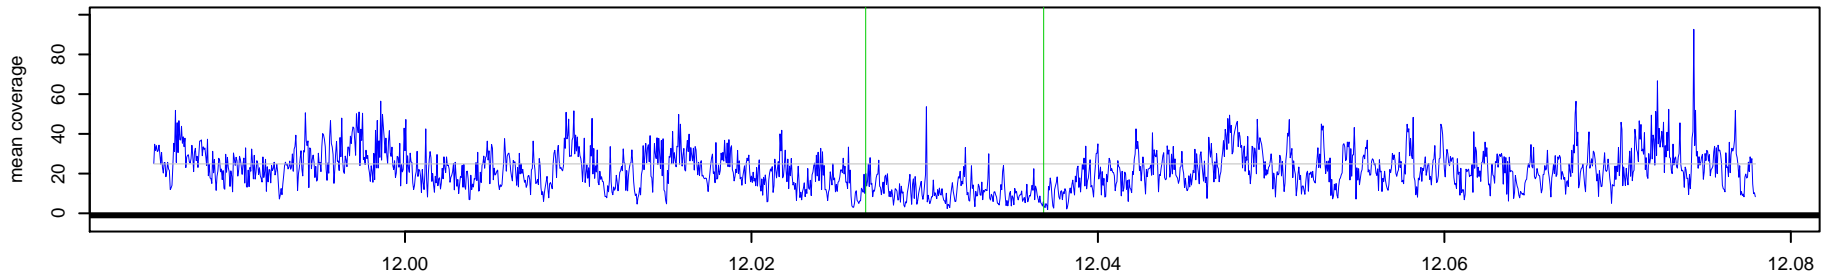

632 \_ NA10851 Chr 19 : 12026595 – 12036868 , 10274 bp (aCGH relative log2ratio= -0.63 )

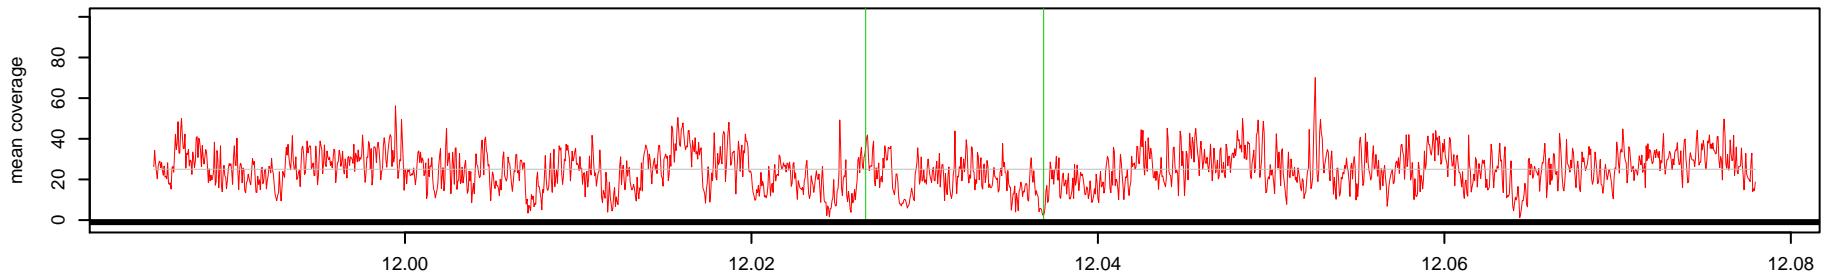

Log2( AK1 read depth / NA10851 read depth)

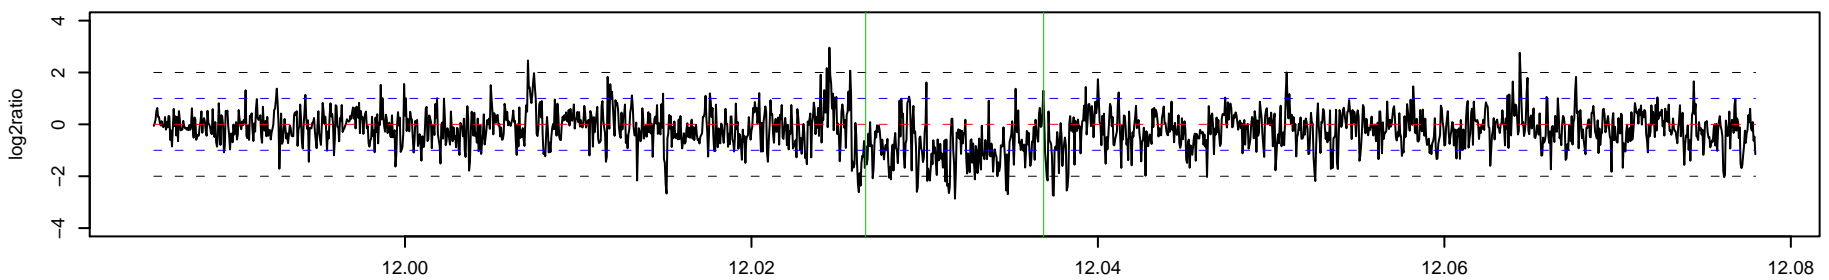



633\_AK1 Chr 19 : 12555464 – 12556903 , 1440 bp (aCGH relative log2ratio= 0.55 )

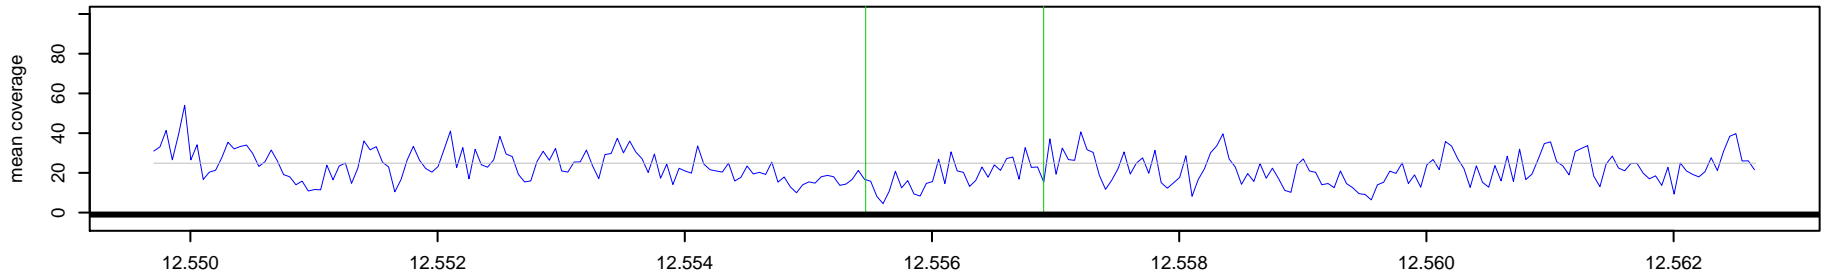

633\_NA10851 Chr 19 : 12555464 – 12556903 , 1440 bp (aCGH relative log2ratio= 0.55 )

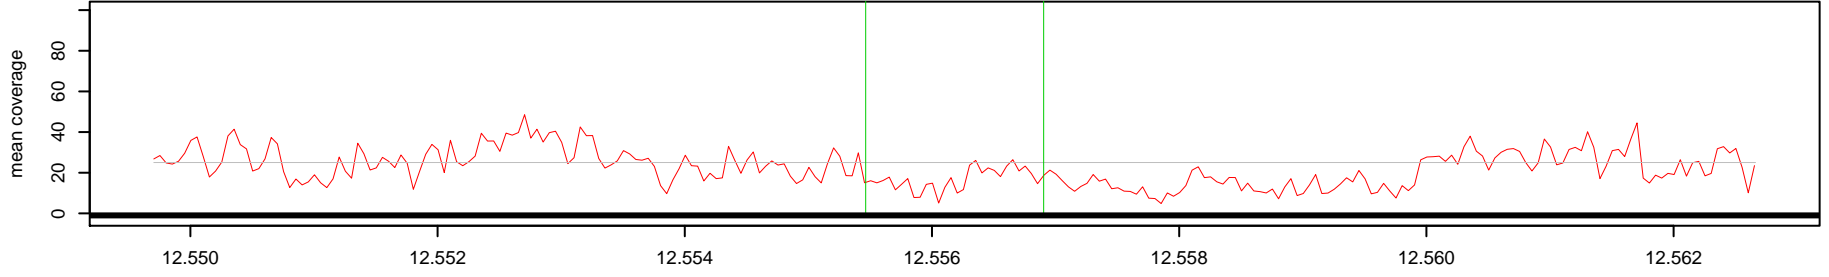

Log2( AK1 read depth / NA10851 read depth)

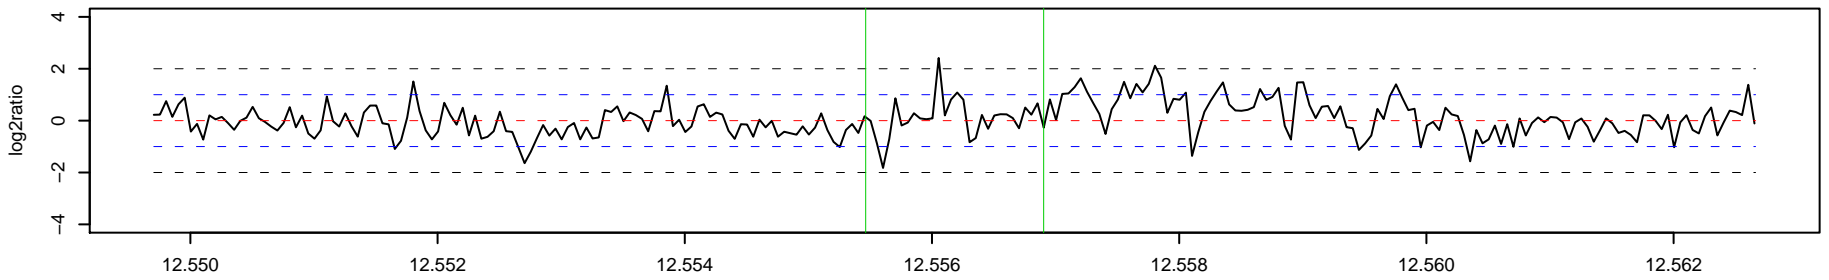

634\_AK1 Chr 19 : 13637109 – 13637805 , 697 bp (aCGH relative log2ratio= -0.72 )

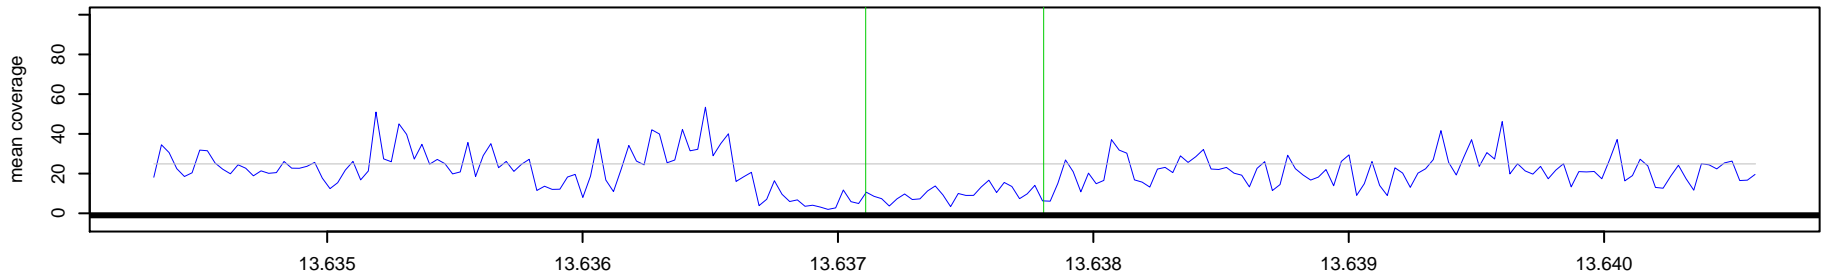

634\_NA10851 Chr 19 : 13637109 – 13637805 , 697 bp (aCGH relative log2ratio= -0.72 )

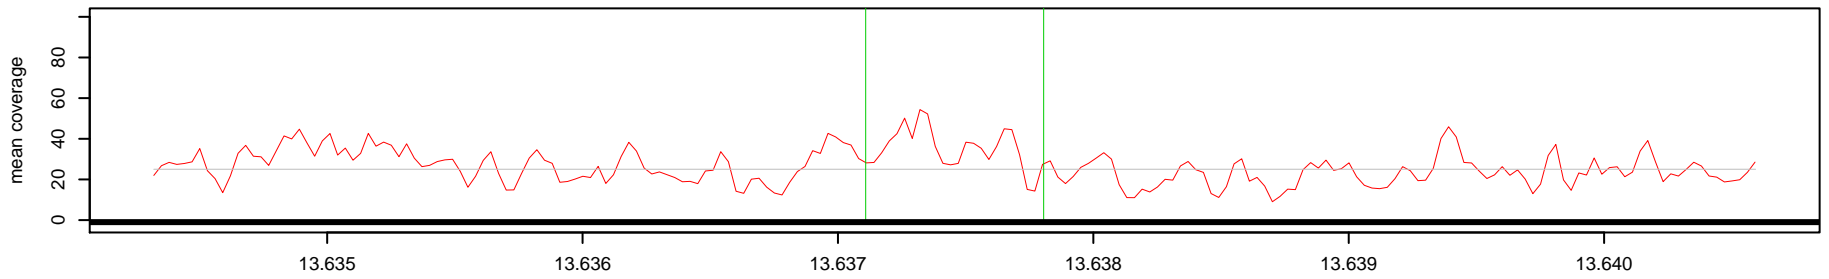

Log2( AK1 read depth / NA10851 read depth)

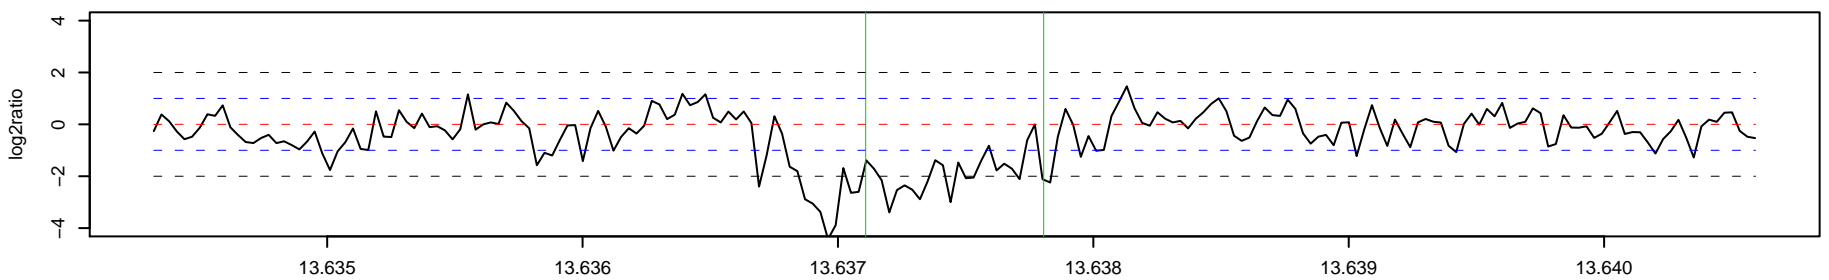

635\_AK1 Chr 19 : 19698824 – 19700664 , 1841 bp (aCGH relative log2ratio= 0.64 )

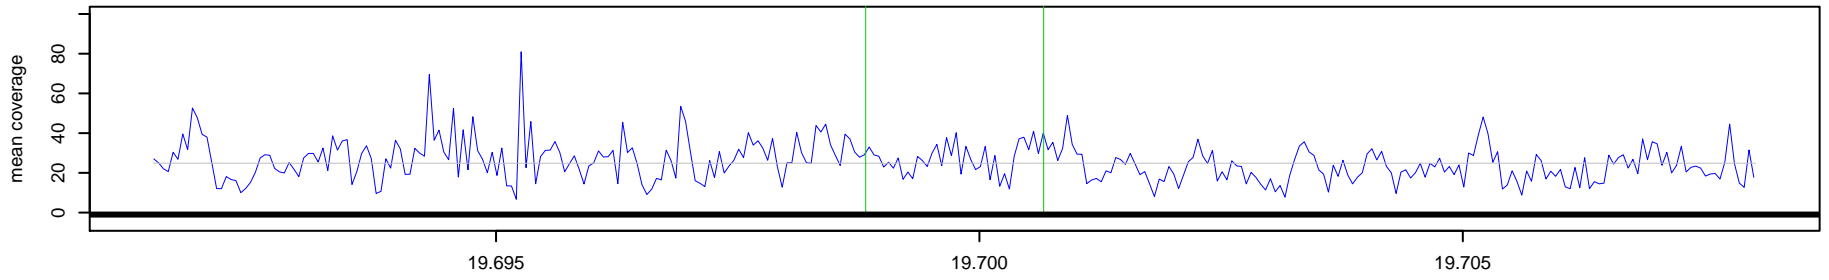

635\_NA10851 Chr 19 : 19698824 – 19700664 , 1841 bp (aCGH relative log2ratio= 0.64 )

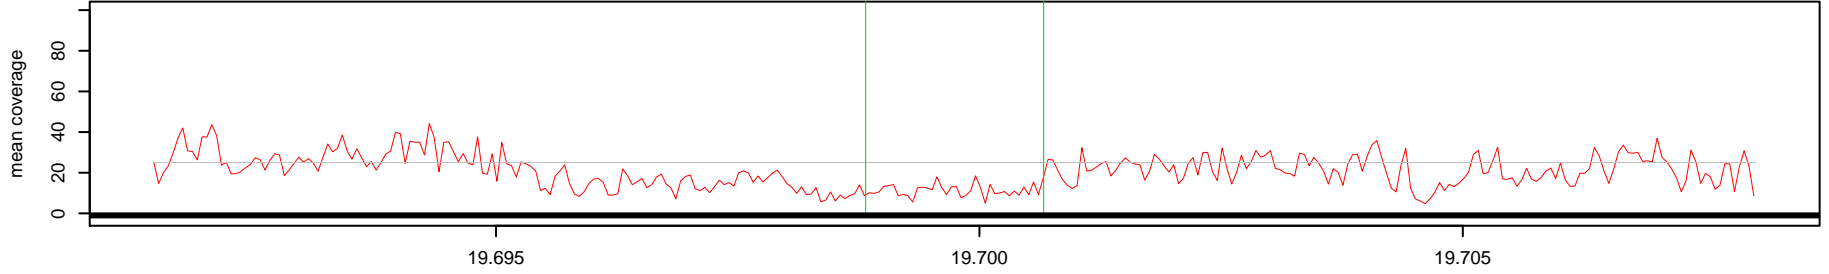

Log2( AK1 read depth / NA10851 read depth)

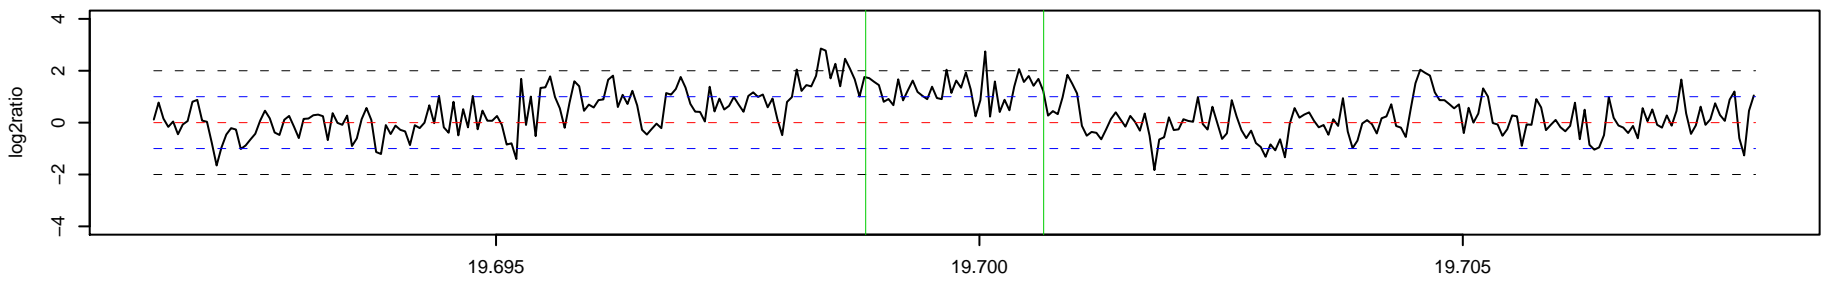

636\_AK1 Chr 19 : 20592810 – 20593703 , 894 bp (aCGH relative log2ratio= 0.56 )

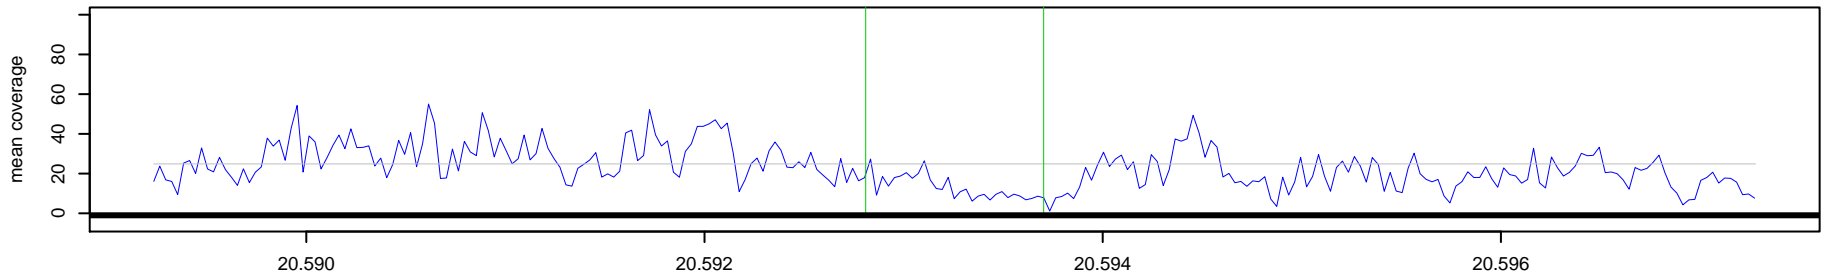

636\_NA10851 Chr 19 : 20592810 – 20593703 , 894 bp (aCGH relative log2ratio= 0.56 )

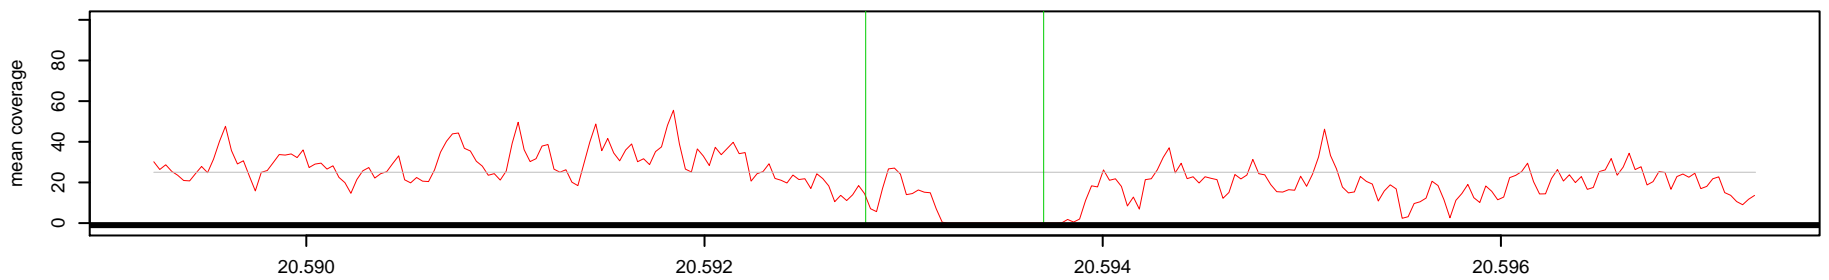

Log2( AK1 read depth / NA10851 read depth)

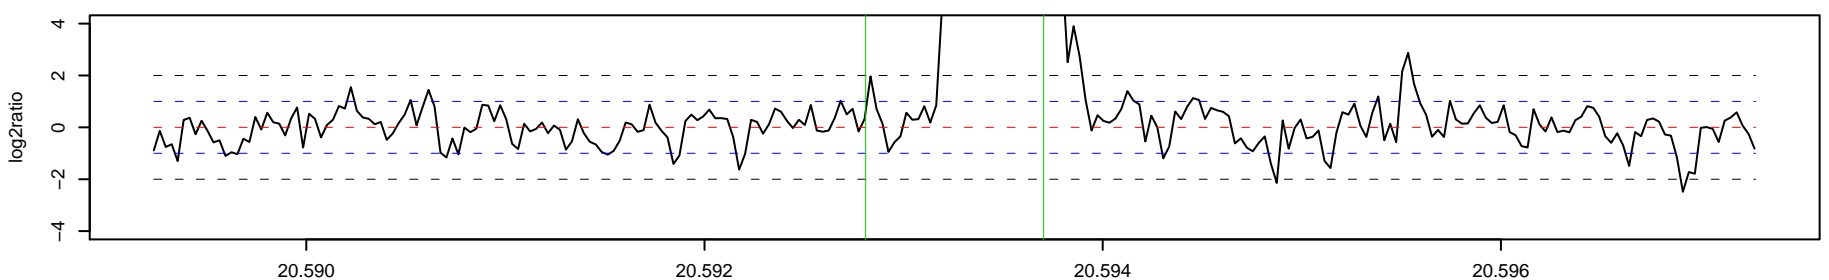

637\_AK1 Chr 19 : 22117432 – 23014332 , 896901 bp (aCGH relative log2ratio= 0.52 )

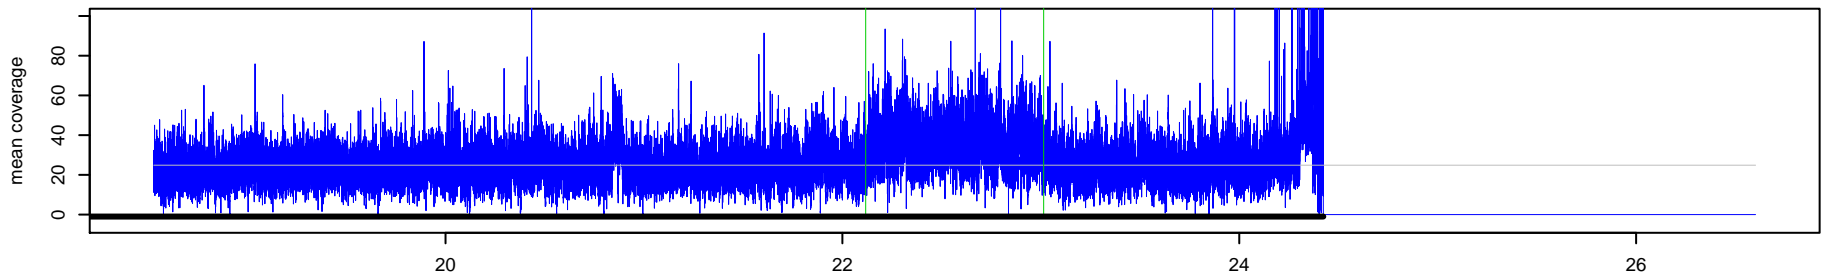

637\_NA10851 Chr 19 : 22117432 – 23014332 , 896901 bp (aCGH relative log2ratio= 0.52 )

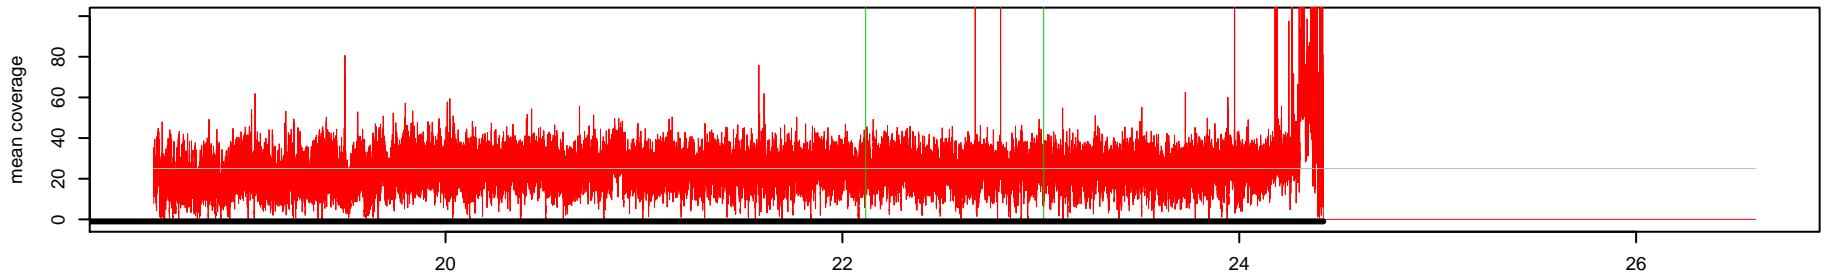

Log2( AK1 read depth / NA10851 read depth)

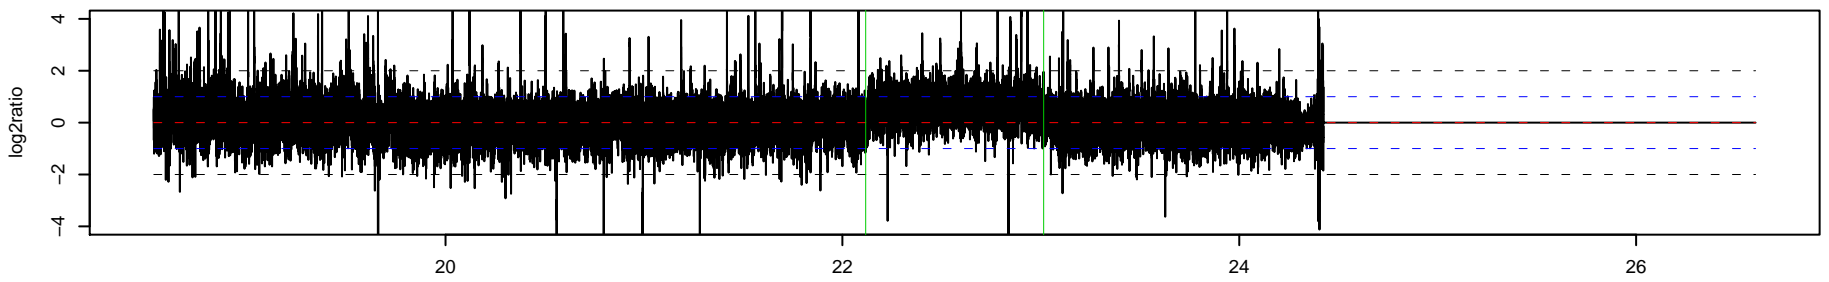

638\_AK1 Chr 19 : 39419325 – 39421925 , 2601 bp (aCGH relative log2ratio= 0.63 )

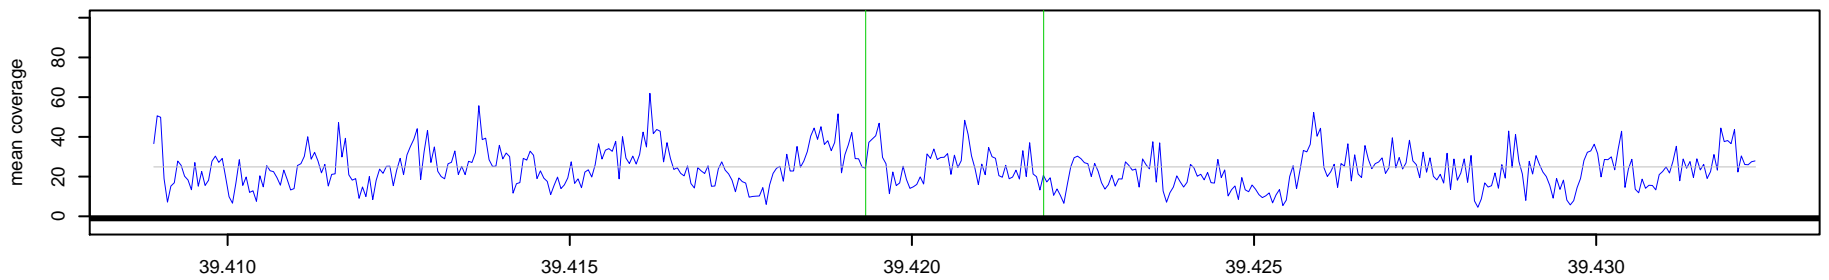

638\_NA10851 Chr 19 : 39419325 – 39421925 , 2601 bp (aCGH relative log2ratio= 0.63 )

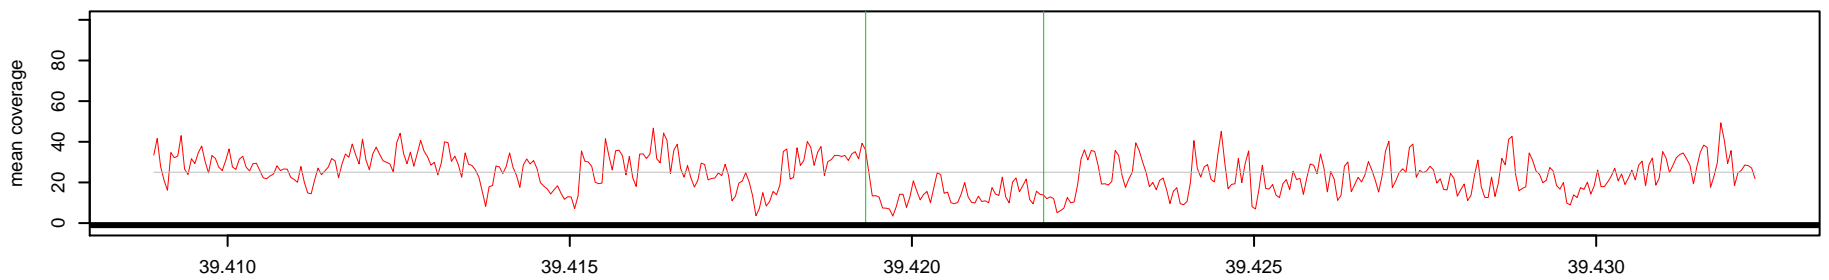

Log2( AK1 read depth / NA10851 read depth)

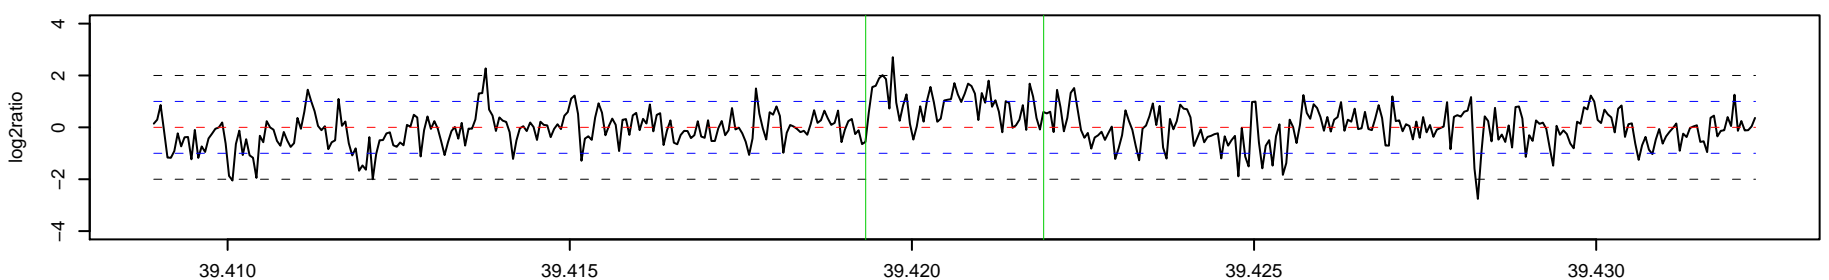

639\_AK1 Chr 19 : 40352819 – 40356844 , 4026 bp (aCGH relative log2ratio= -0.91 )

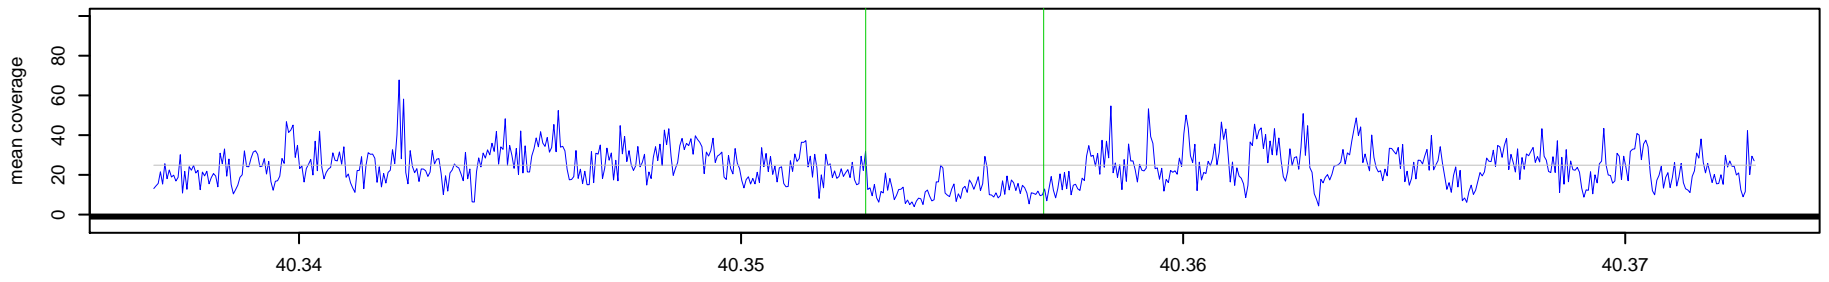

639\_NA10851 Chr 19 : 40352819 – 40356844 , 4026 bp (aCGH relative log2ratio= -0.91 )

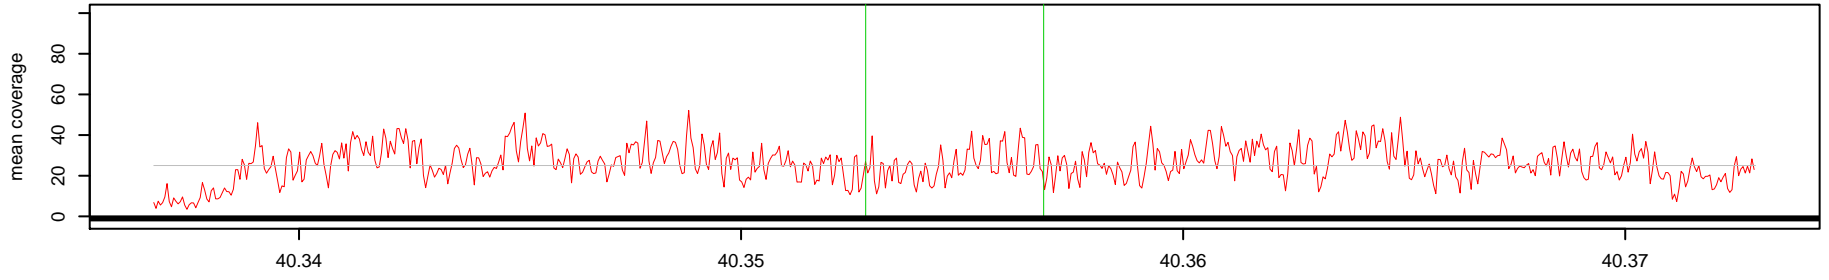

Log2( AK1 read depth / NA10851 read depth)

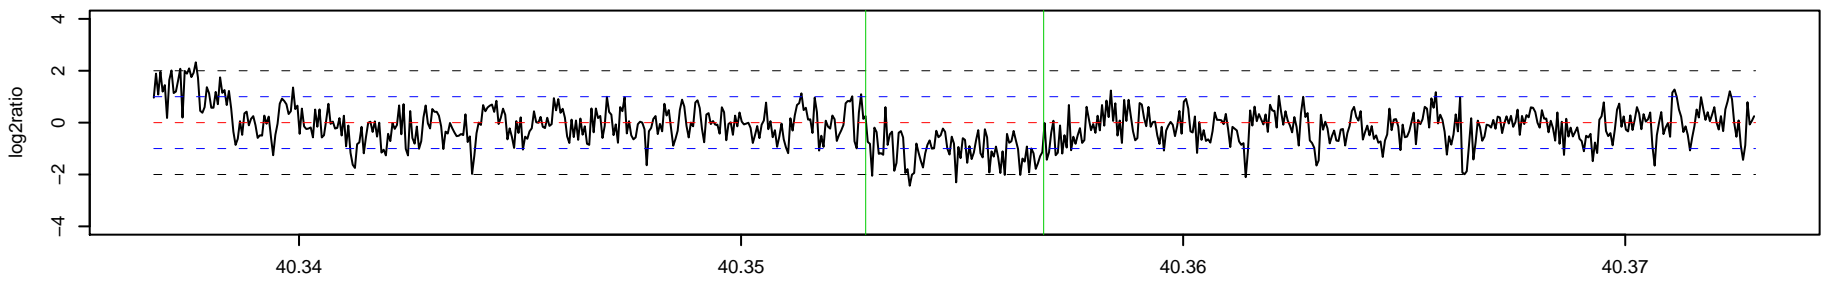

640\_AK1 Chr 19 : 48401914 – 48449754 , 47841 bp (aCGH relative log2ratio= 0.55 )

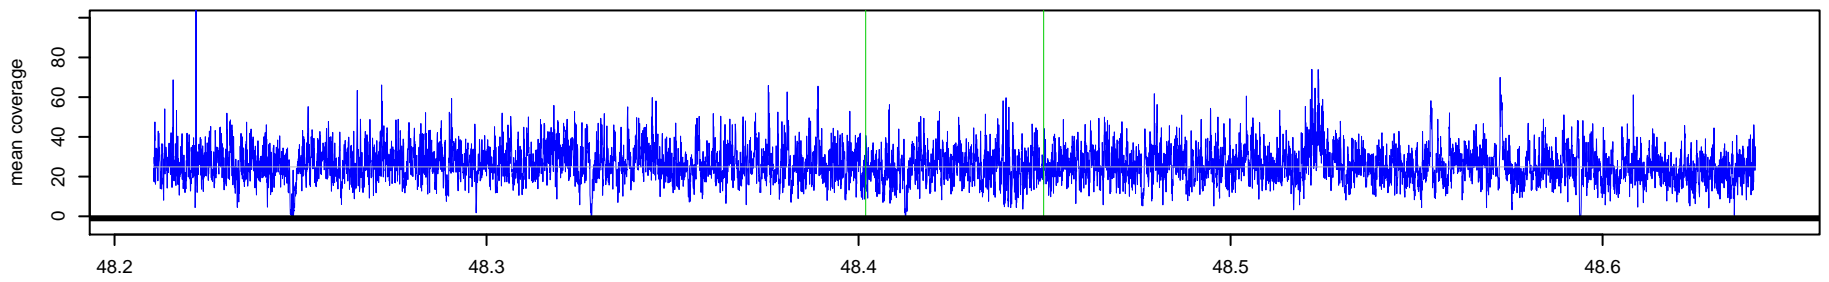

640\_NA10851 Chr 19 : 48401914 – 48449754 , 47841 bp (aCGH relative log2ratio= 0.55 )

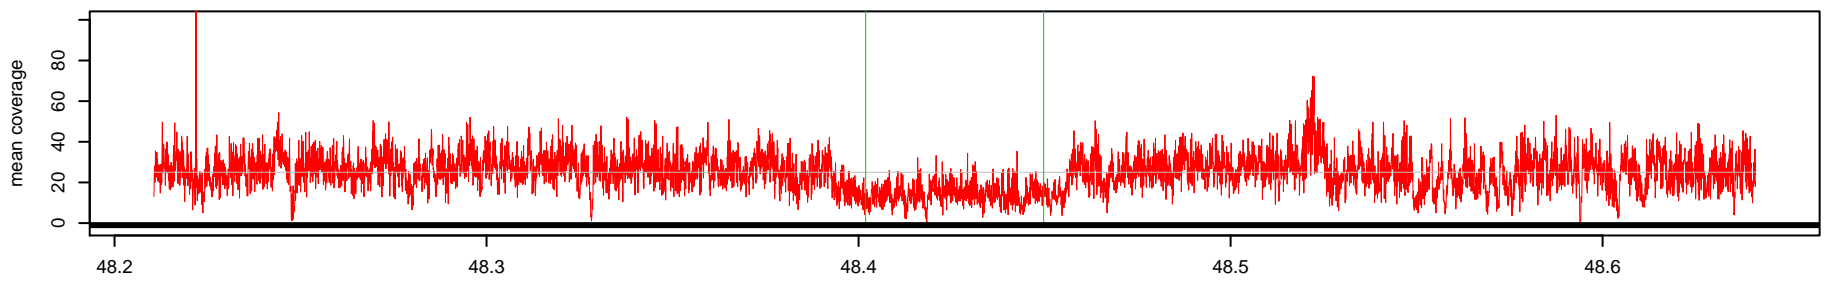

Log2( AK1 read depth / NA10851 read depth)

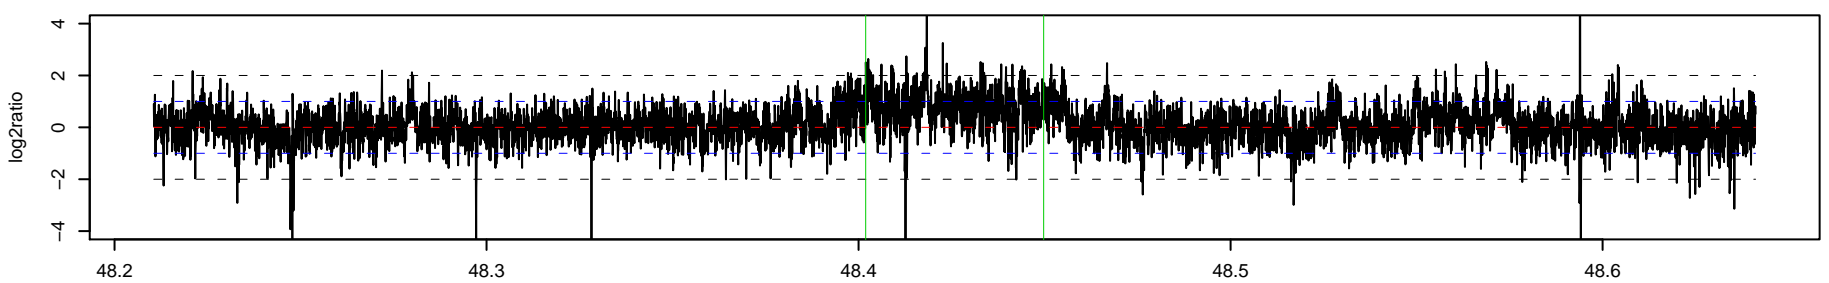

641 \_ AK1 Chr 19 : 55769972 – 55772929 , 2958 bp (aCGH relative log2ratio= -0.80 )

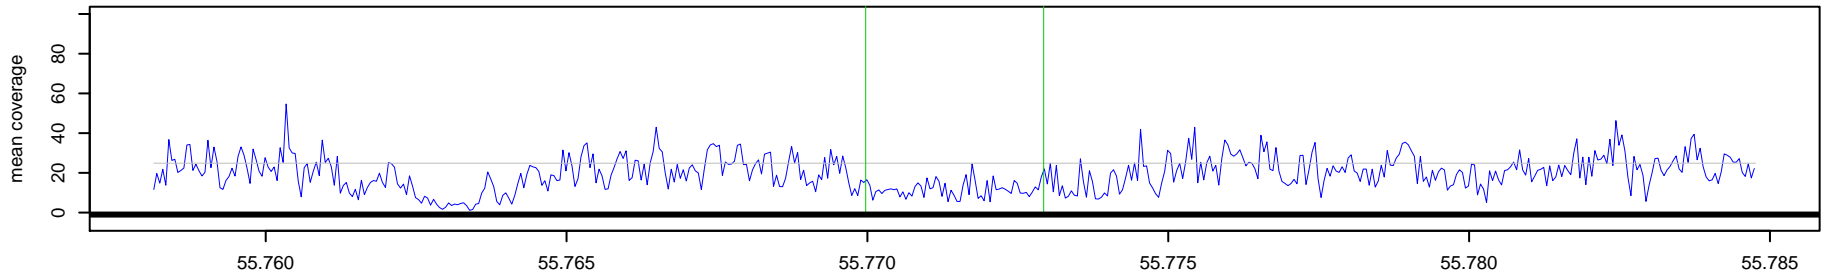

641 \_ NA10851 Chr 19 : 55769972 – 55772929 , 2958 bp (aCGH relative log2ratio= -0.80 )

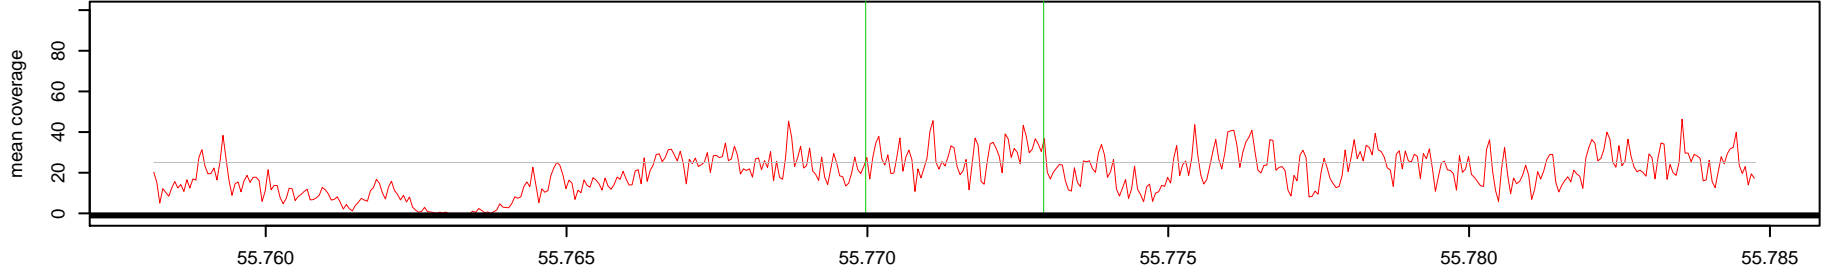

Log2( AK1 read depth / NA10851 read depth)

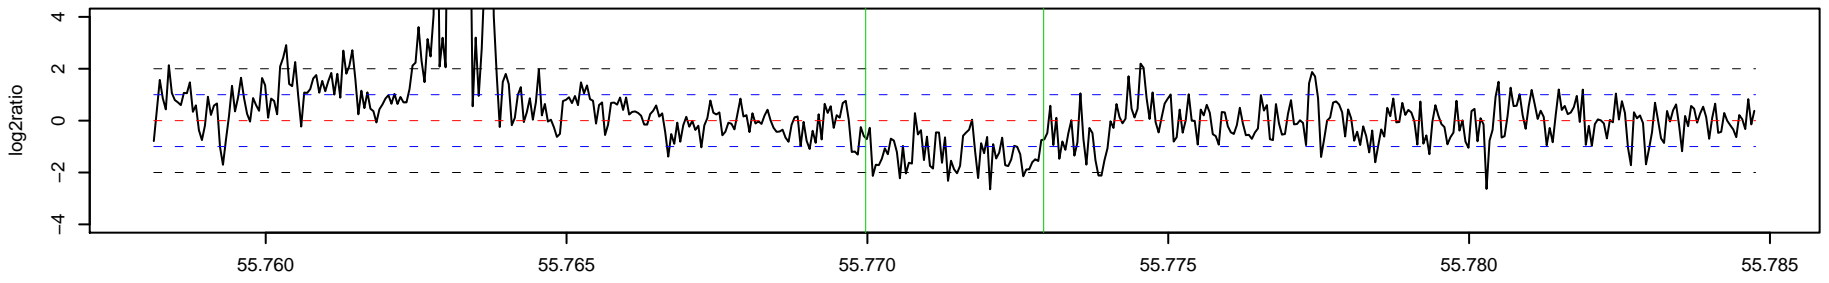

642 \_ AK1 Chr 19 : 58019653 – 58047046 , 27394 bp (aCGH relative log2ratio= 0.48 )

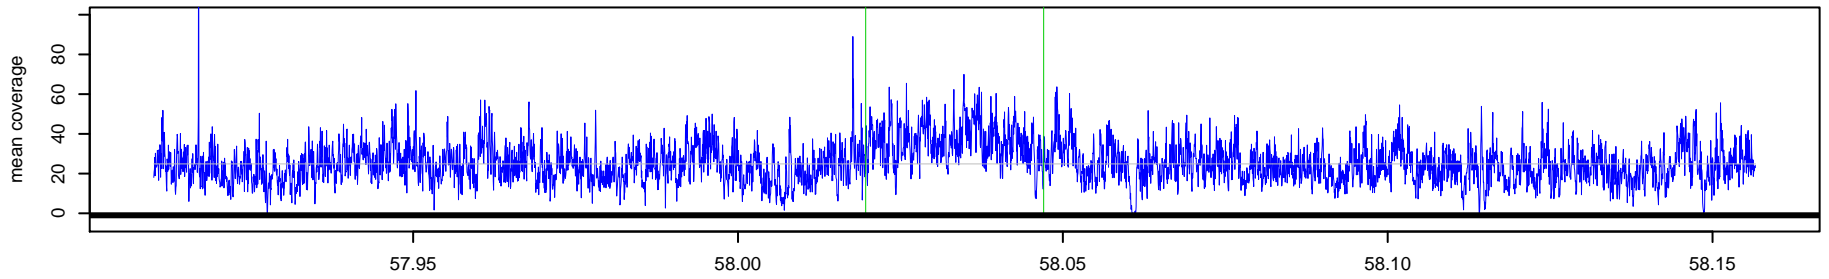

642 \_ NA10851 Chr 19 : 58019653 – 58047046 , 27394 bp (aCGH relative log2ratio= 0.48 )

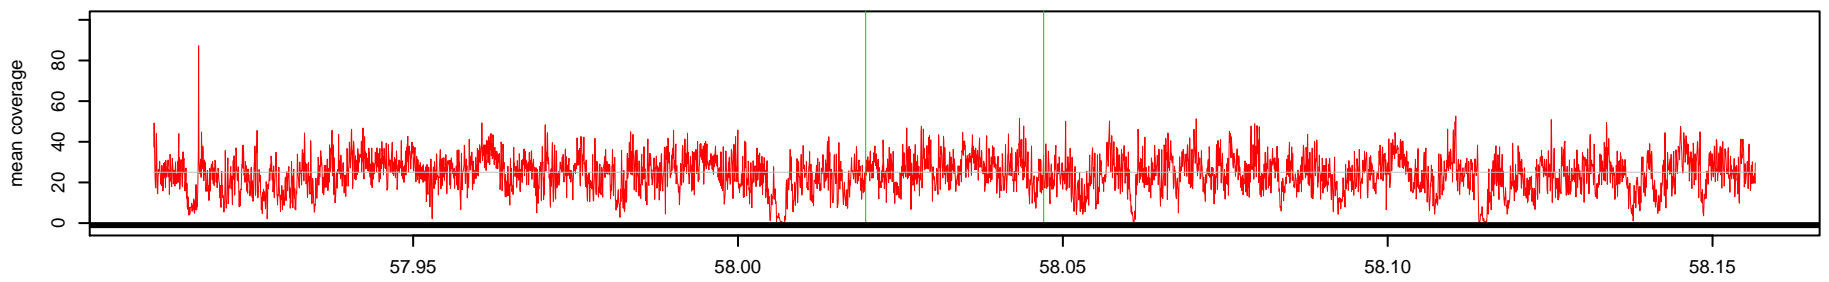

Log2( AK1 read depth / NA10851 read depth)

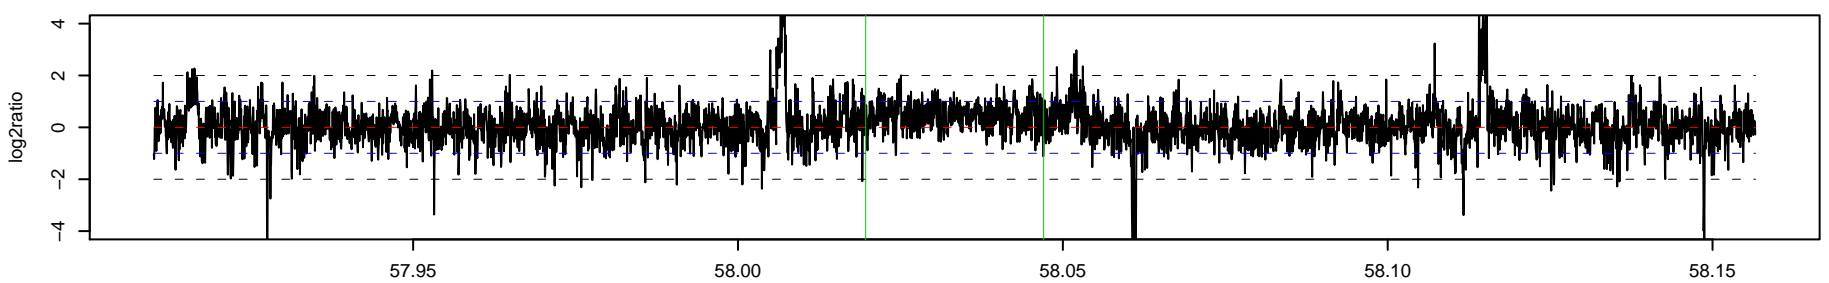

643 \_ AK1 Chr 19 : 58210442 – 58244232 , 33791 bp (aCGH relative log2ratio= -0.64 )

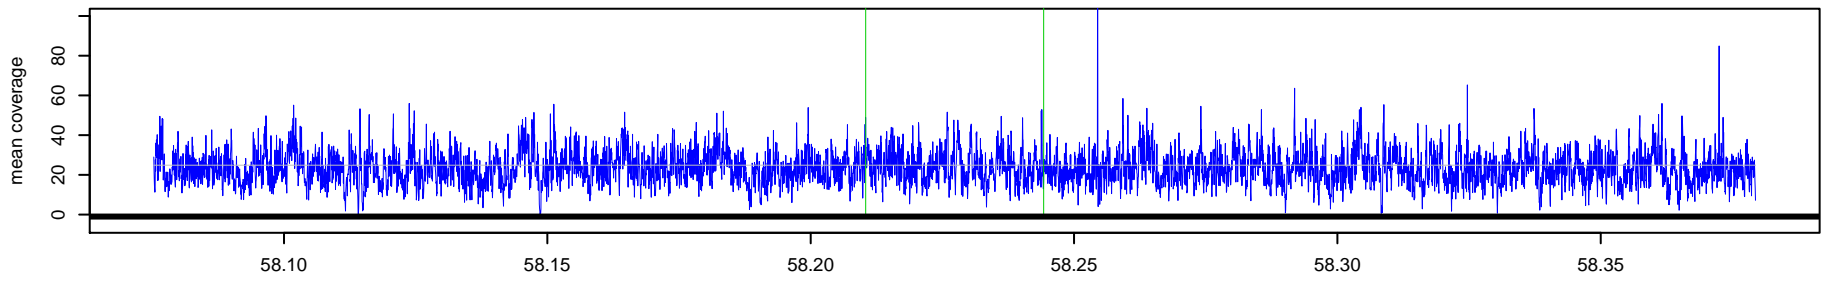

643 \_ NA10851 Chr 19 : 58210442 – 58244232 , 33791 bp (aCGH relative log2ratio= -0.64 )

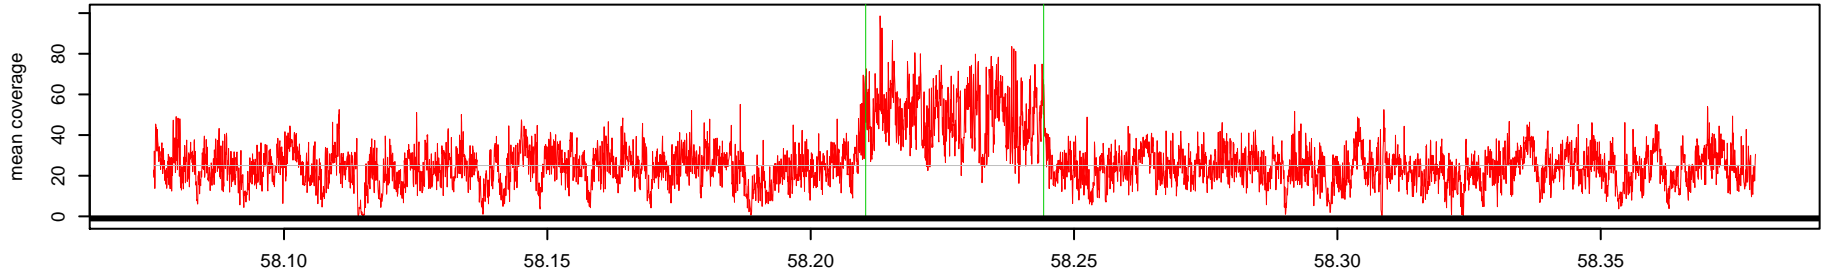

Log2( AK1 read depth / NA10851 read depth)

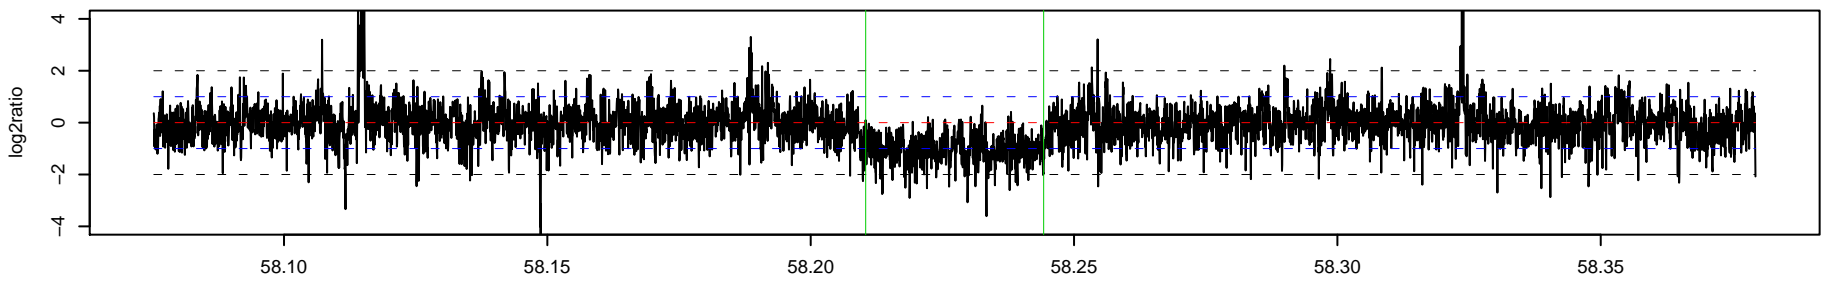

644 \_ AK1 Chr 19 : 59248856 – 59252447 , 3592 bp (aCGH relative log2ratio= 0.54 )

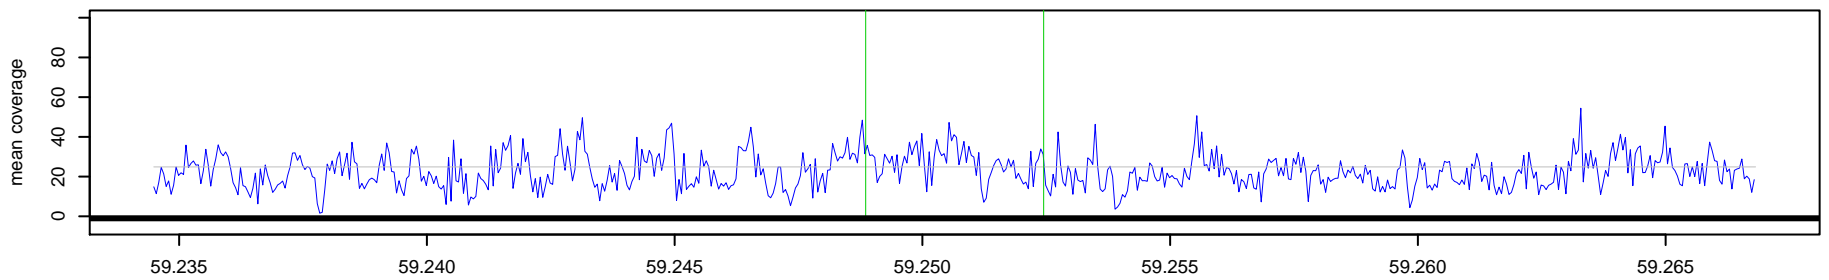

644 \_ NA10851 Chr 19 : 59248856 – 59252447 , 3592 bp (aCGH relative log2ratio= 0.54 )

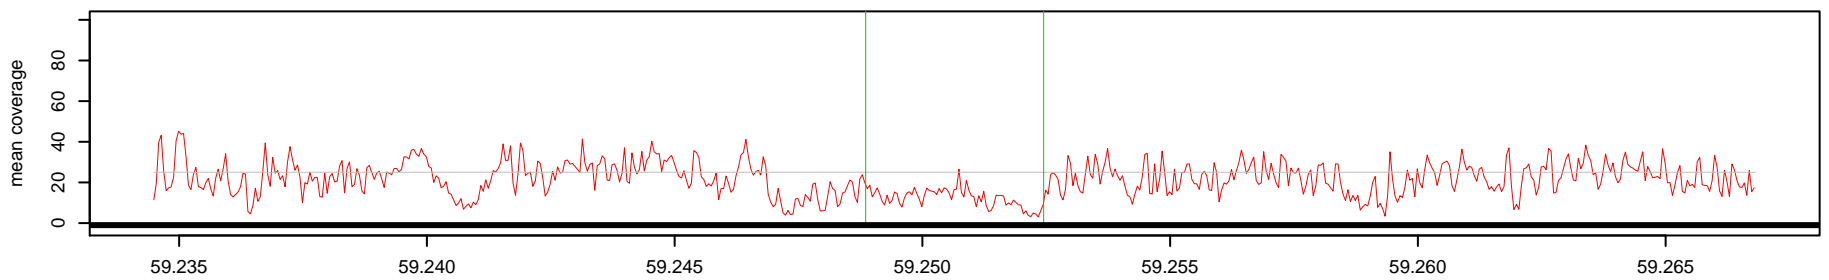

Log2( AK1 read depth / NA10851 read depth)

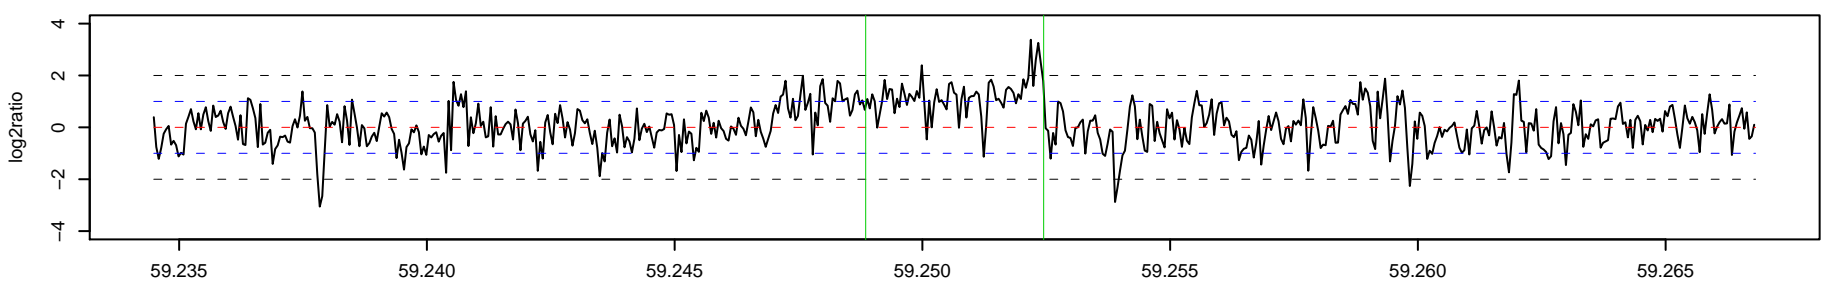

645 \_ AK1 Chr 19 : 59492450 – 59497392 , 4943 bp (aCGH relative log2ratio= -1.04 )

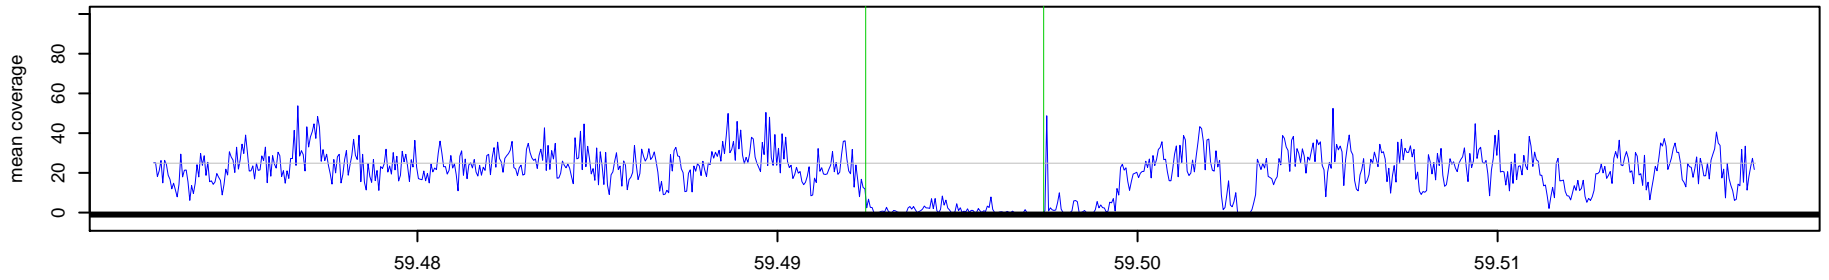

645 \_ NA10851 Chr 19 : 59492450 – 59497392 , 4943 bp (aCGH relative log2ratio= -1.04 )

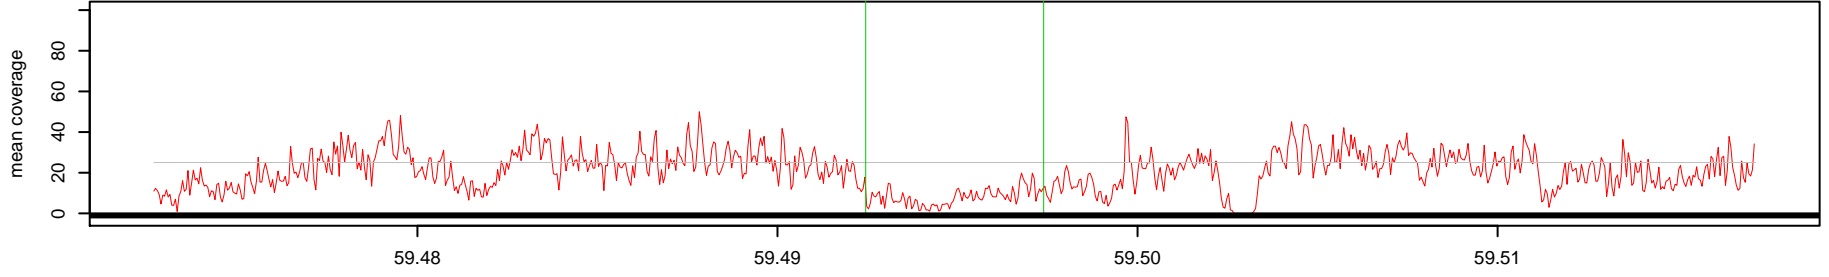

Log2( AK1 read depth / NA10851 read depth)

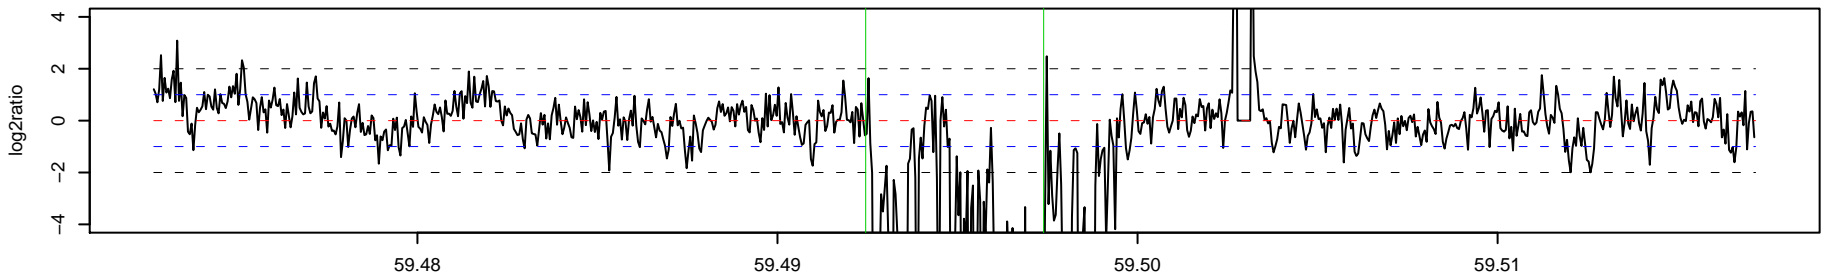

646 \_ AK1 Chr 19 : 59492795 – 59496502 , 3708 bp (aCGH relative log2ratio= -0.70 )

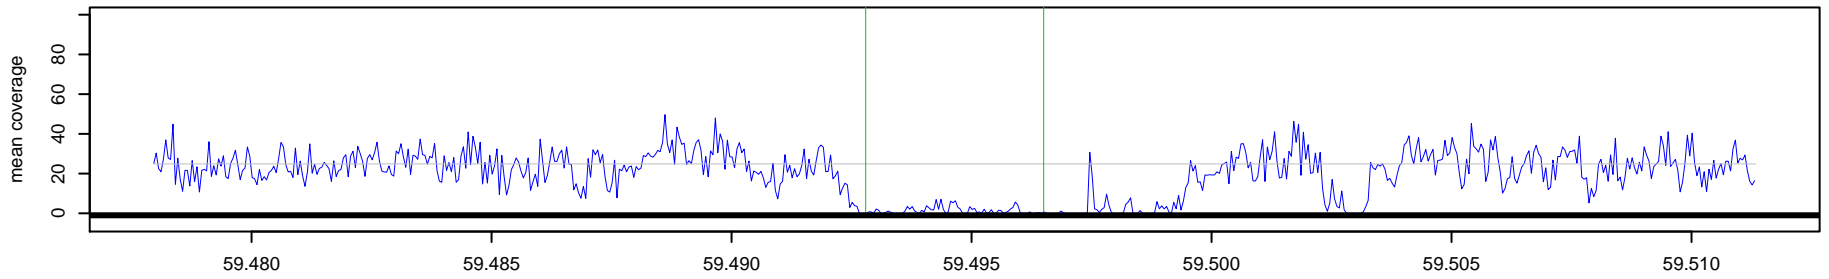

646 \_ NA10851 Chr 19 : 59492795 – 59496502 , 3708 bp (aCGH relative log2ratio= -0.70 )

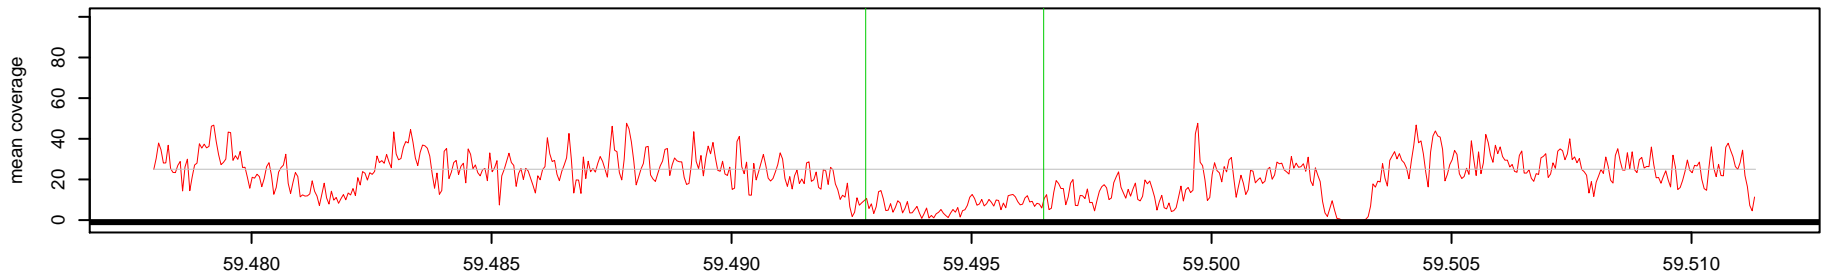

Log2( AK1 read depth / NA10851 read depth)

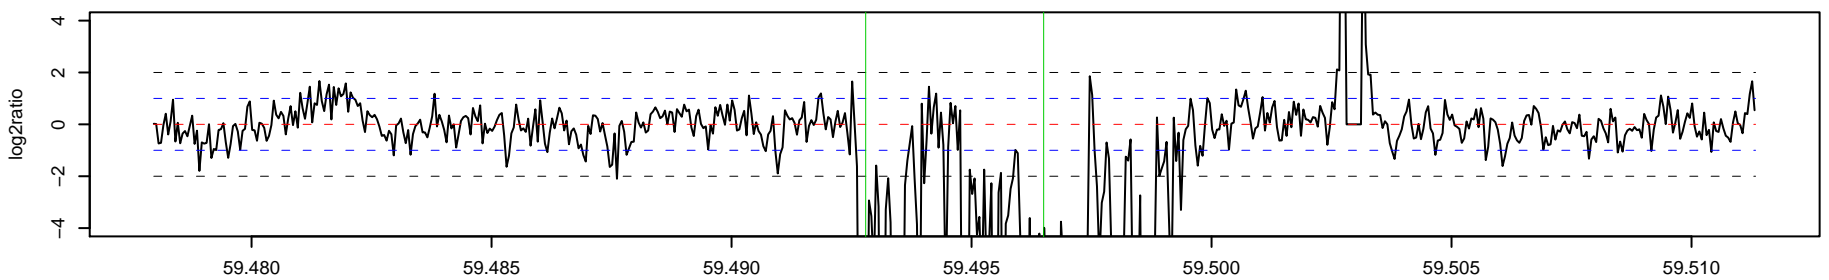

647\_AK1 Chr 19 : 59496502 – 59497101 , 600 bp (aCGH relative log2ratio= -1.85 )

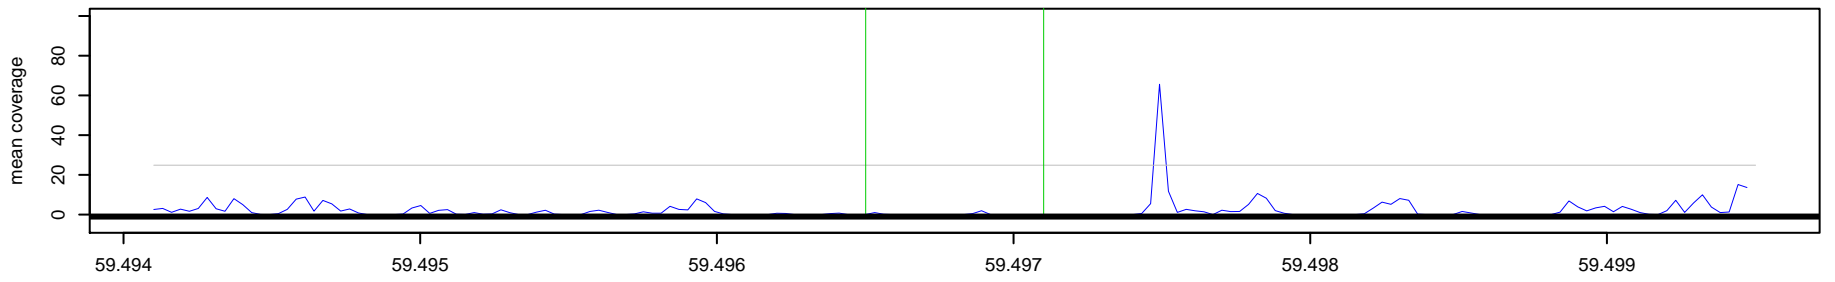

647\_NA10851 Chr 19 : 59496502 – 59497101 , 600 bp (aCGH relative log2ratio= -1.85 )

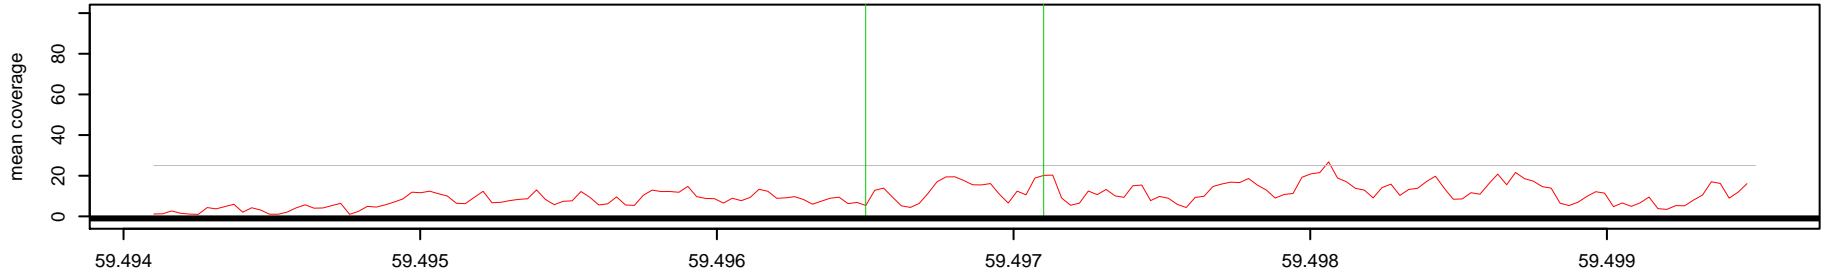

Log2( AK1 read depth / NA10851 read depth)

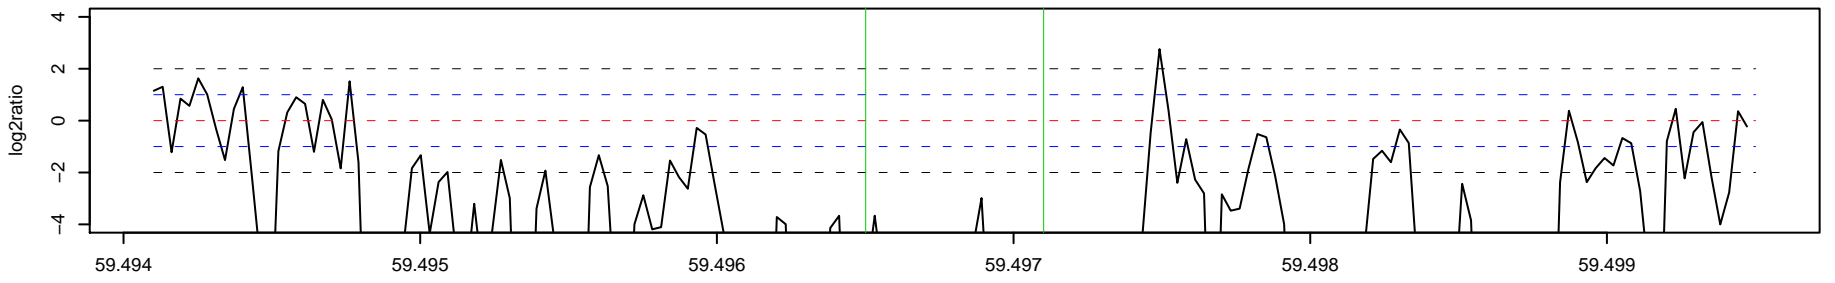

648\_AK1 Chr 19 : 61558250 – 61560627 , 2378 bp (aCGH relative log2ratio= 0.75 )

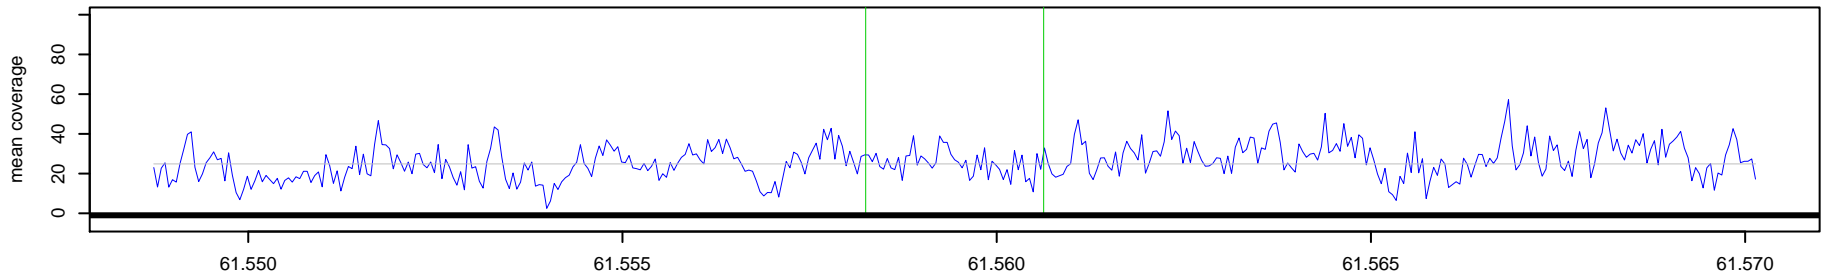

648\_NA10851 Chr 19 : 61558250 – 61560627 , 2378 bp (aCGH relative log2ratio= 0.75 )

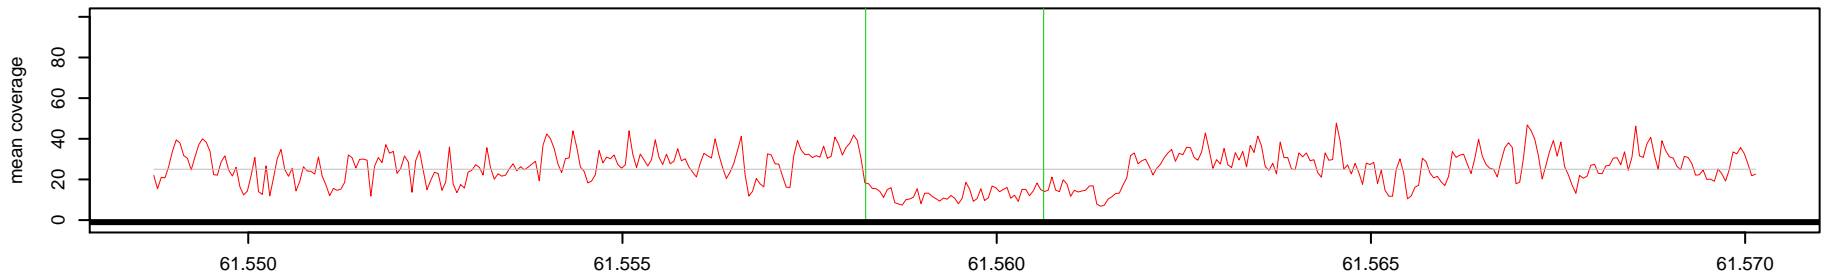

Log2( AK1 read depth / NA10851 read depth)

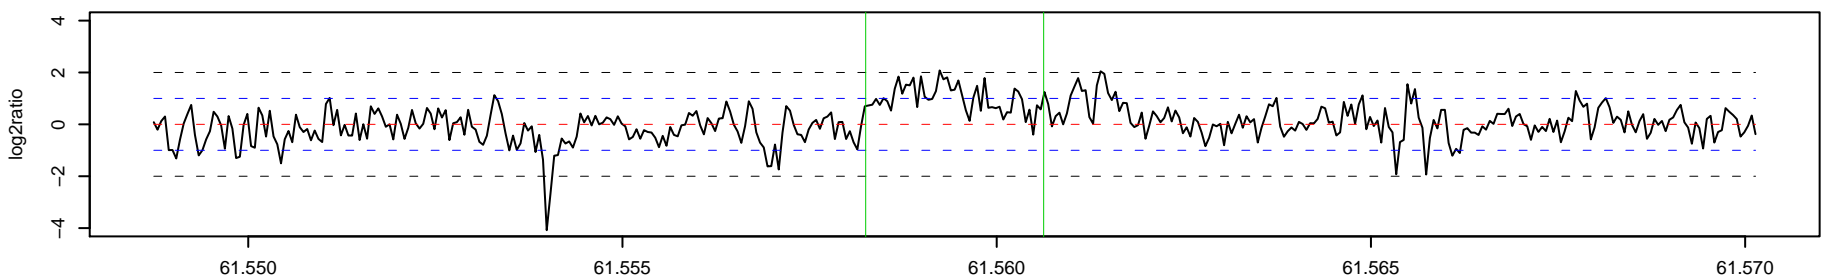



649\_AK1 Chr 19 : 62527459 – 62528308 , 850 bp (aCGH relative log2ratio= 0.60 )

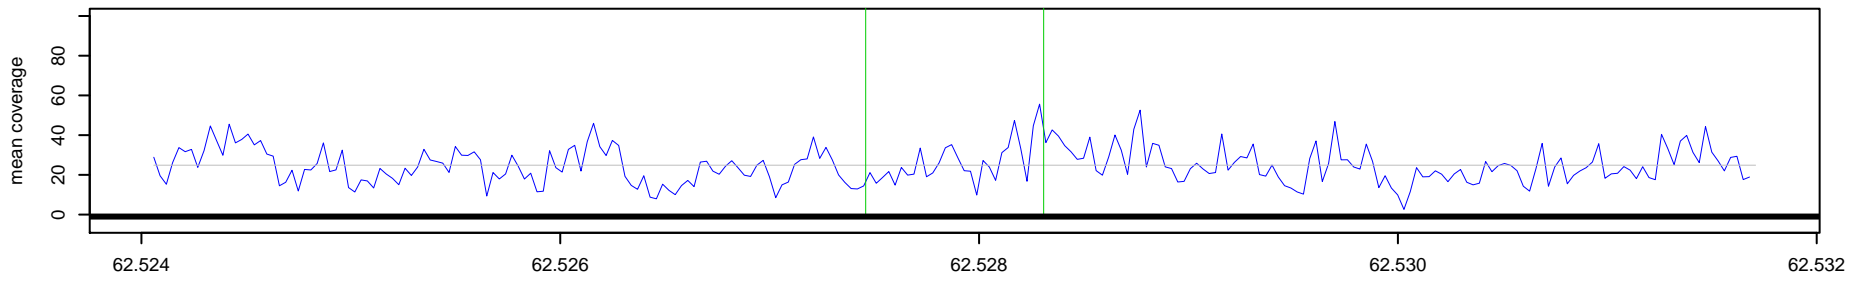

649\_NA10851 Chr 19 : 62527459 – 62528308 , 850 bp (aCGH relative log2ratio= 0.60 )

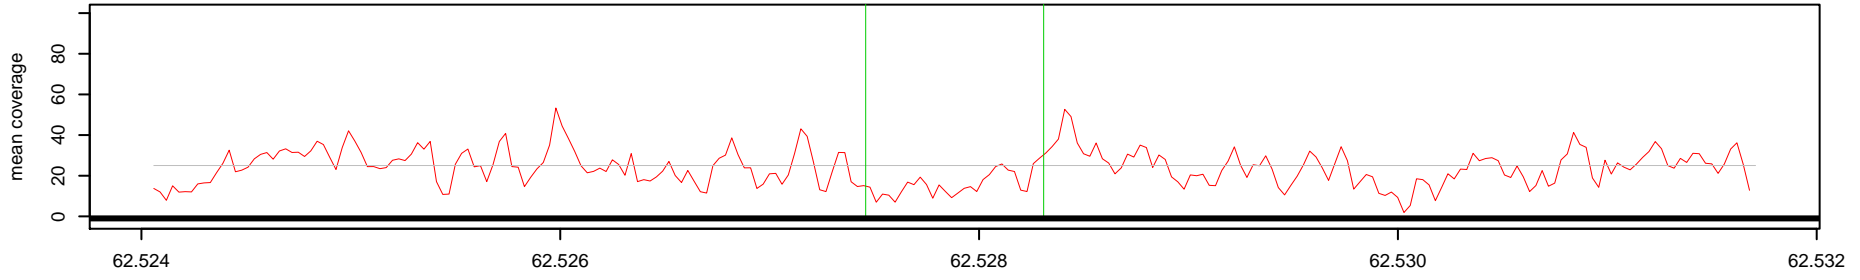

Log2( AK1 read depth / NA10851 read depth)

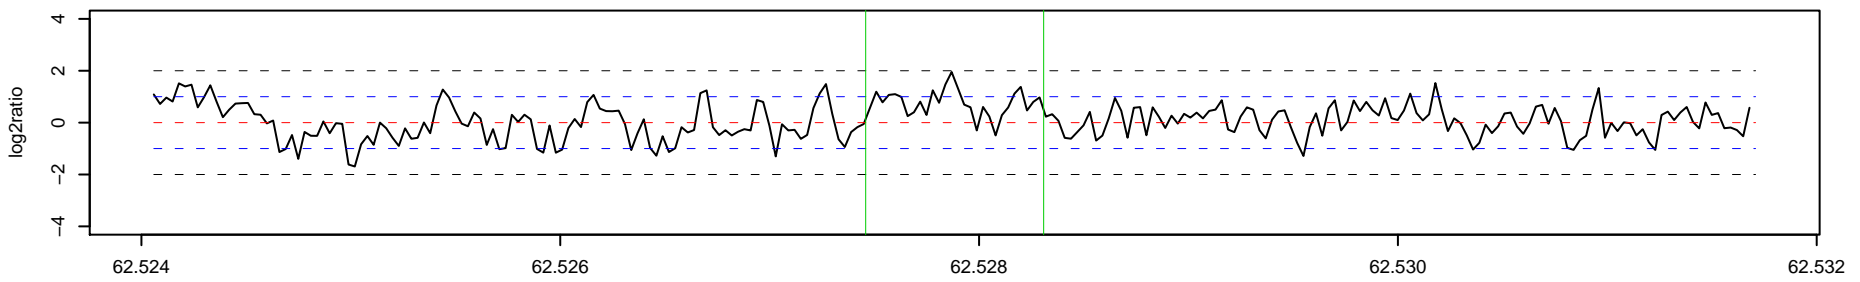

650\_AK1 Chr 20 : 1336947 – 1338285 , 1339 bp (aCGH relative log2ratio= 1.20 )

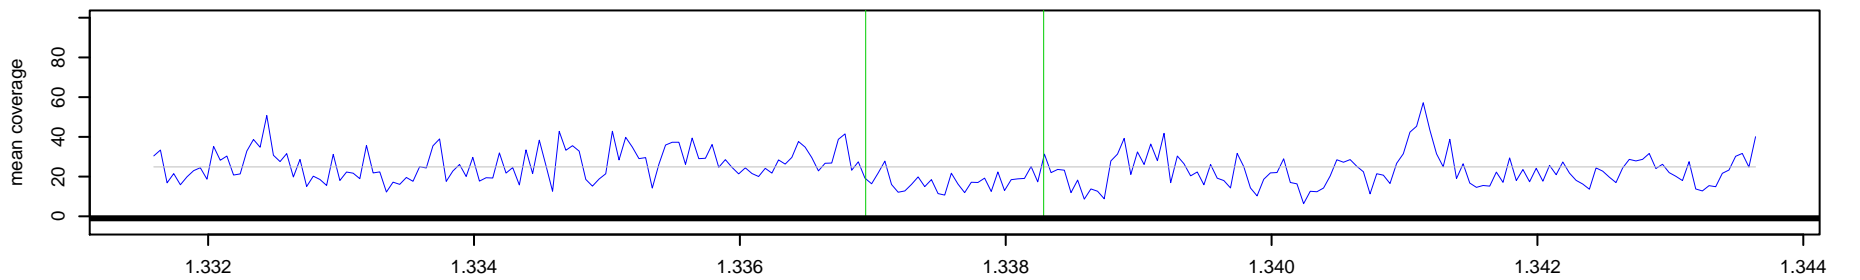

650\_NA10851 Chr 20 : 1336947 – 1338285 , 1339 bp (aCGH relative log2ratio= 1.20 )

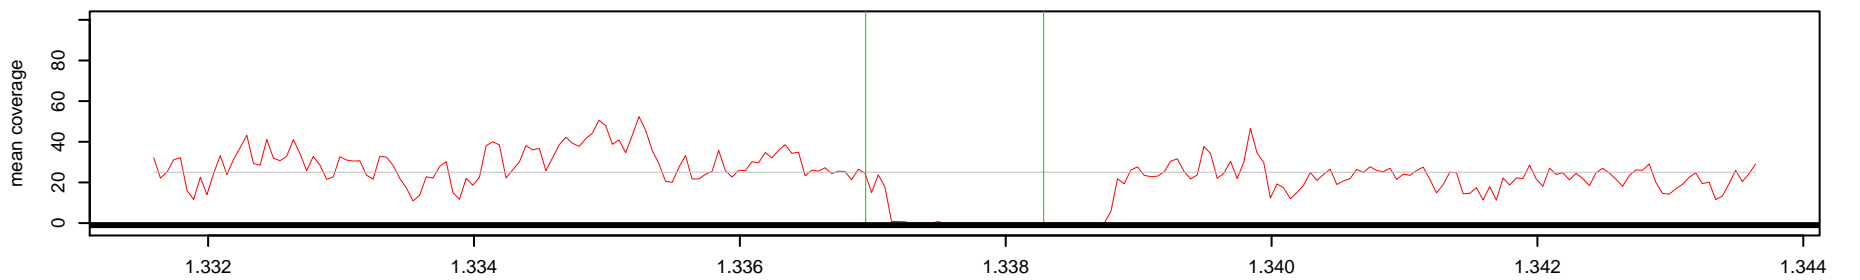

Log2( AK1 read depth / NA10851 read depth)

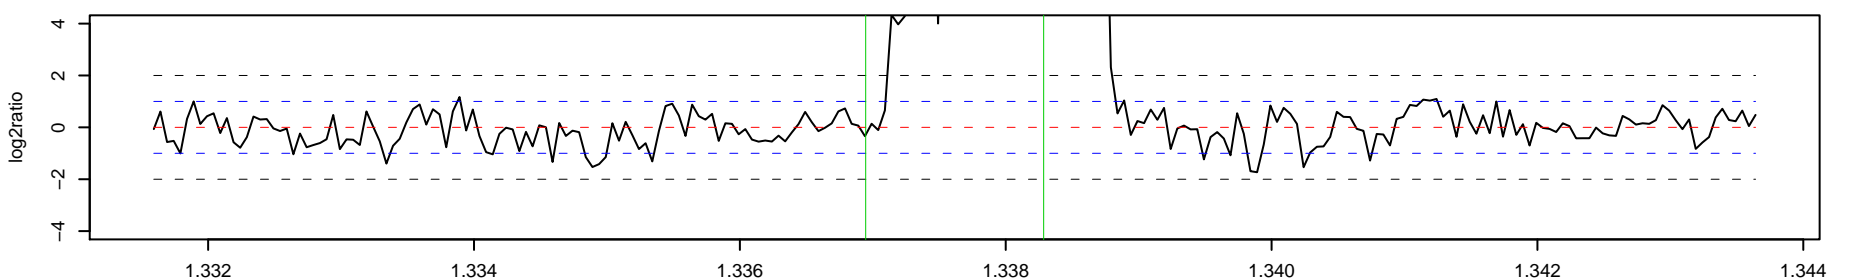

651\_AK1 Chr 20 : 28243004 - 28266072 , 23069 bp (aCGH relative log2ratio= 0.42 )

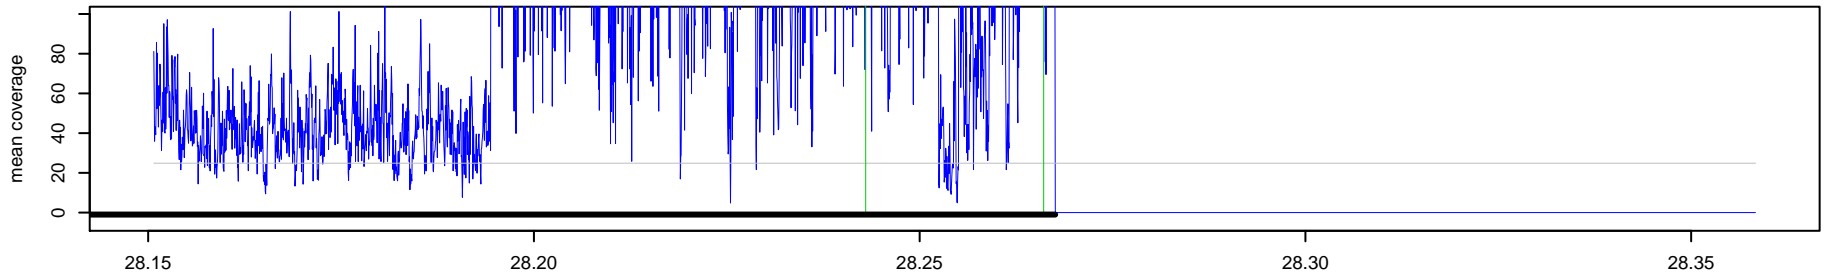

651\_NA10851 Chr 20 : 28243004 - 28266072 , 23069 bp (aCGH relative log2ratio= 0.42 )

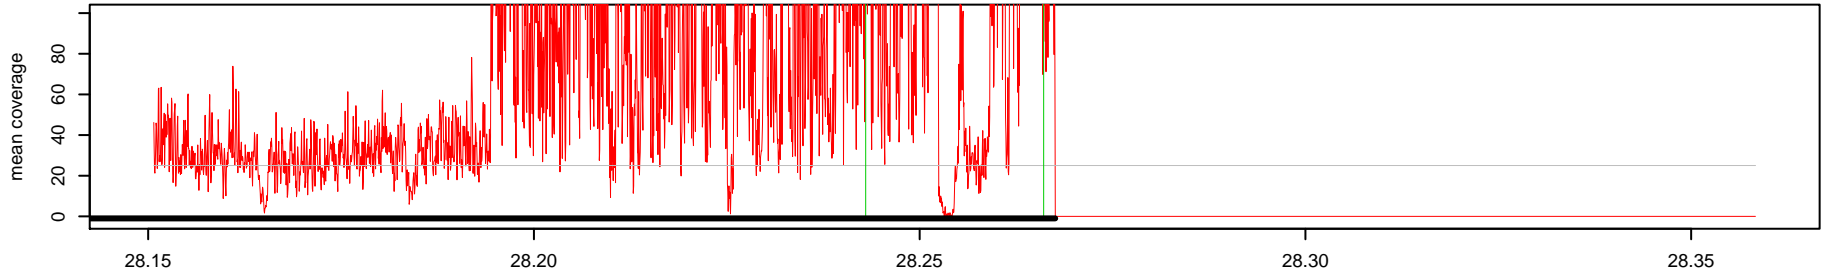

Log2( AK1 read depth / NA10851 read depth)

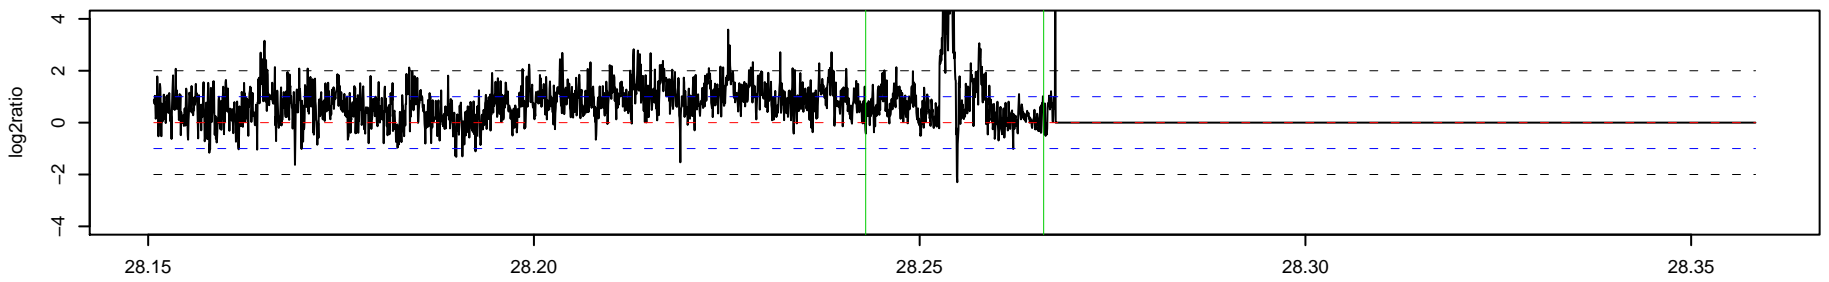

652\_AK1 Chr 20 : 36488503 - 36489226 , 724 bp (aCGH relative log2ratio= -0.94 )

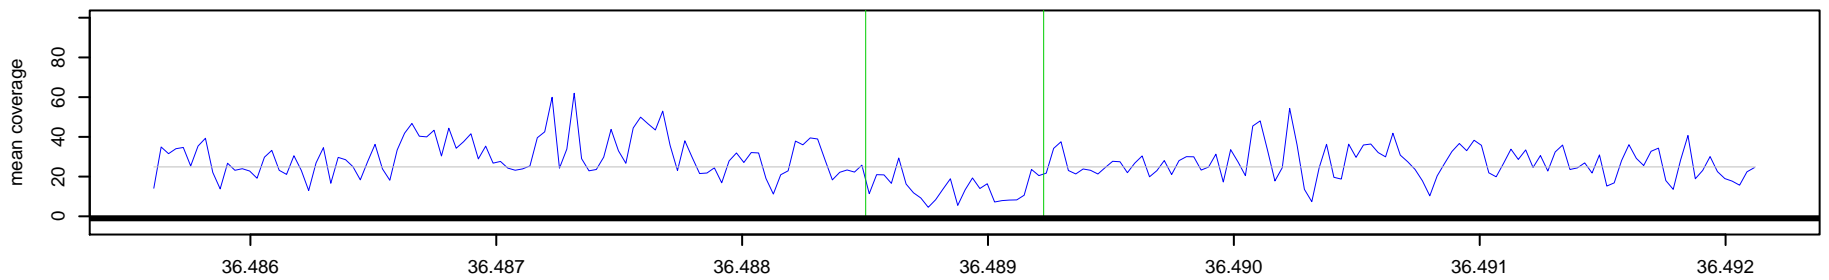

652\_NA10851 Chr 20 : 36488503 - 36489226 , 724 bp (aCGH relative log2ratio= -0.94 )

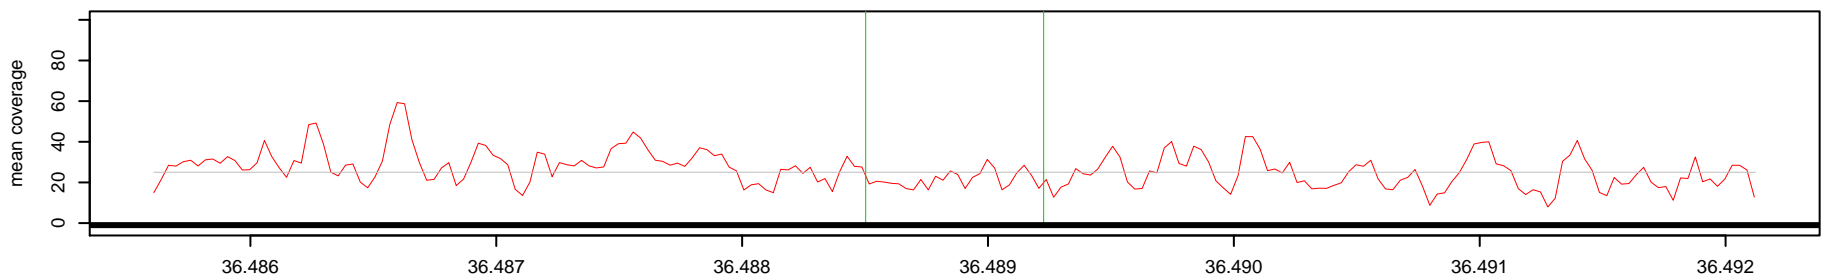

Log2( AK1 read depth / NA10851 read depth)

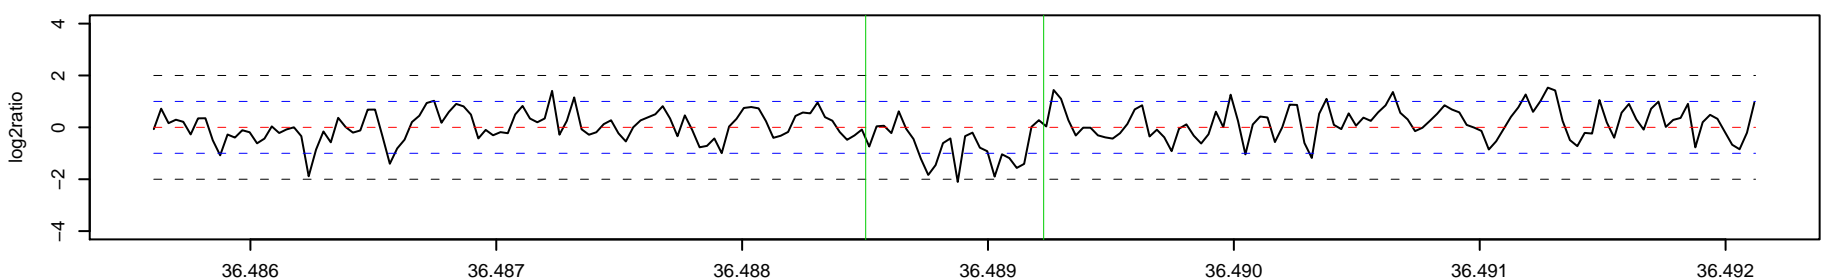

653\_AK1 Chr 20 : 55020883 – 55021354 , 472 bp (aCGH relative log2ratio= -0.69 )

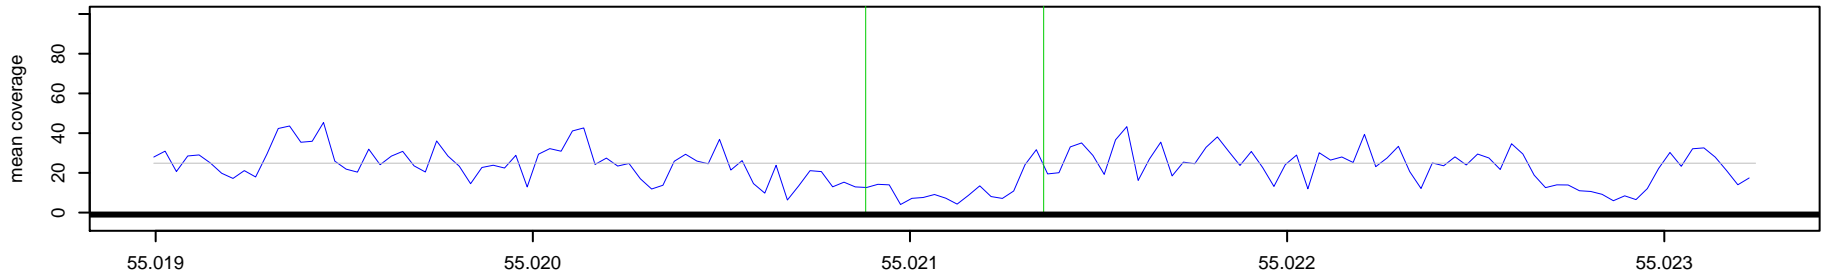

653\_NA10851 Chr 20 : 55020883 – 55021354 , 472 bp (aCGH relative log2ratio= -0.69 )

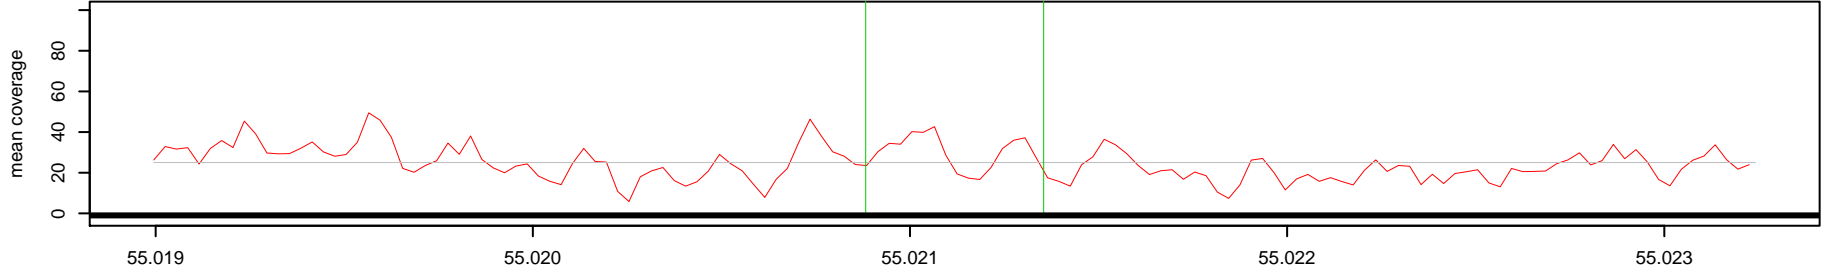

Log2( AK1 read depth / NA10851 read depth)

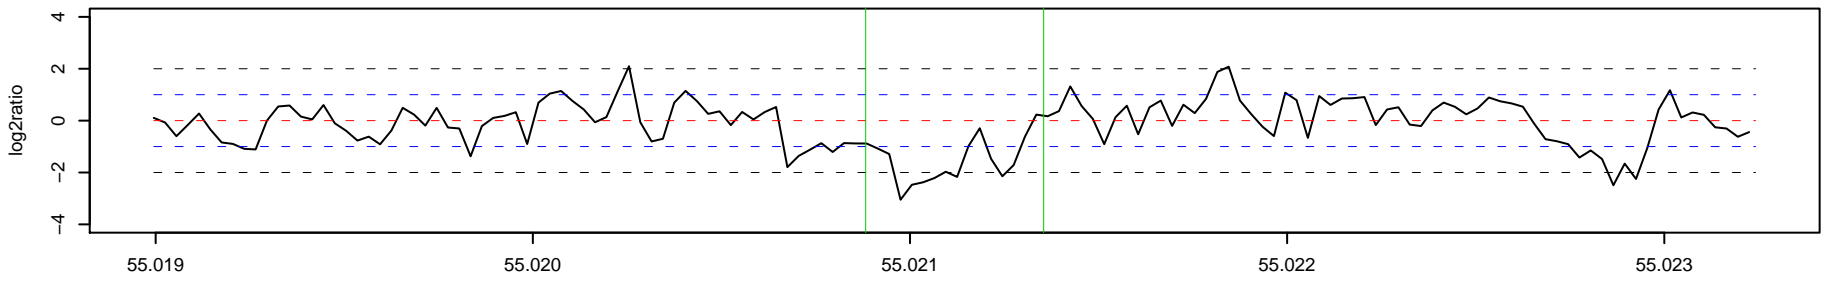

654\_AK1 Chr 21 : 9885862 – 10084431 , 198570 bp (aCGH relative log2ratio= 0.43 )

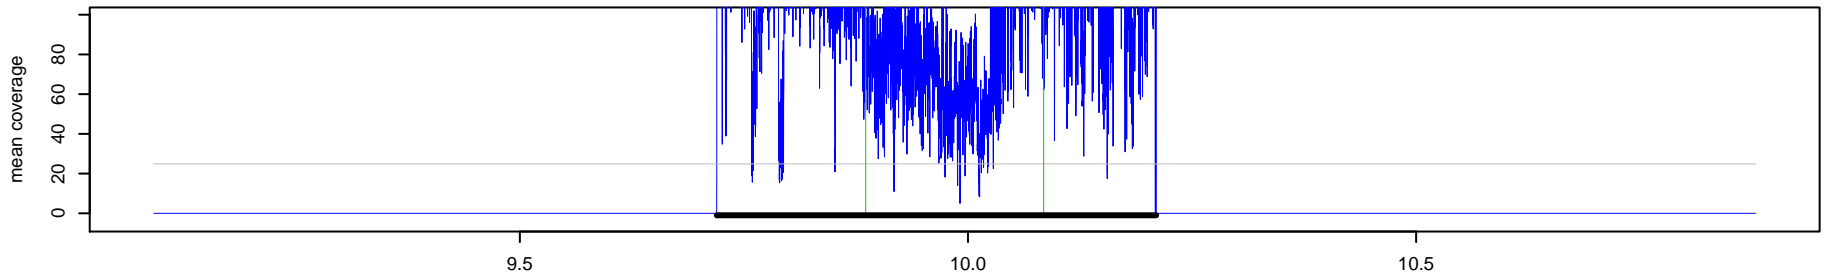

654\_NA10851 Chr 21 : 9885862 – 10084431 , 198570 bp (aCGH relative log2ratio= 0.43 )

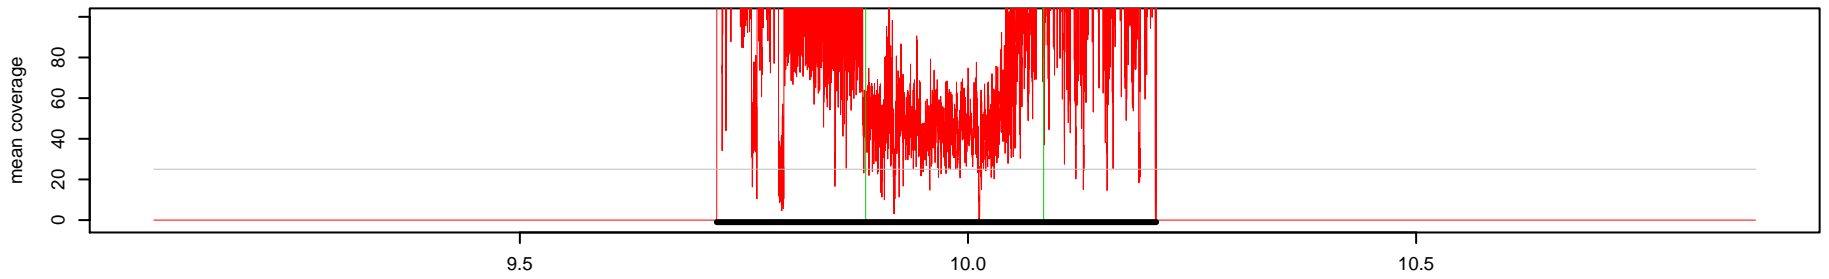

Log2( AK1 read depth / NA10851 read depth)

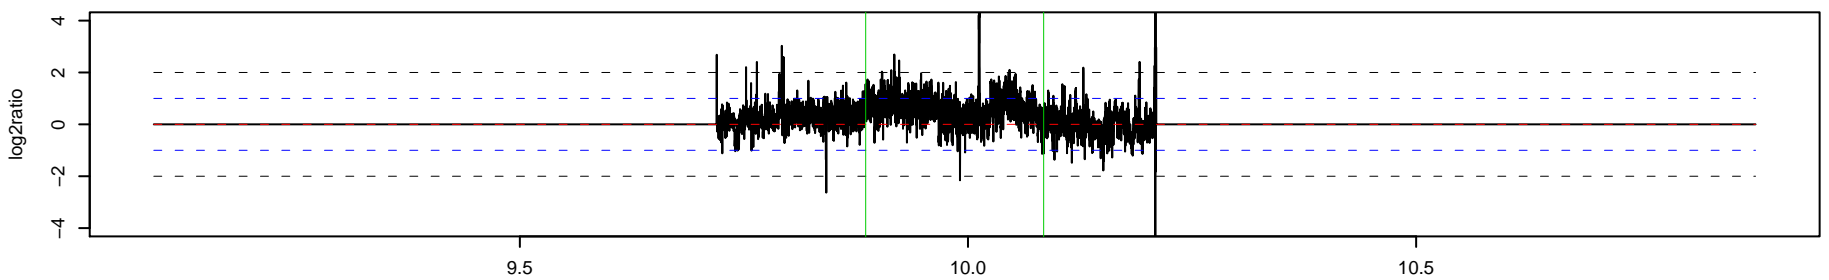

655\_AK1 Chr 21 : 13889159 – 13962680 , 73522 bp (aCGH relative log2ratio= 0.54 )

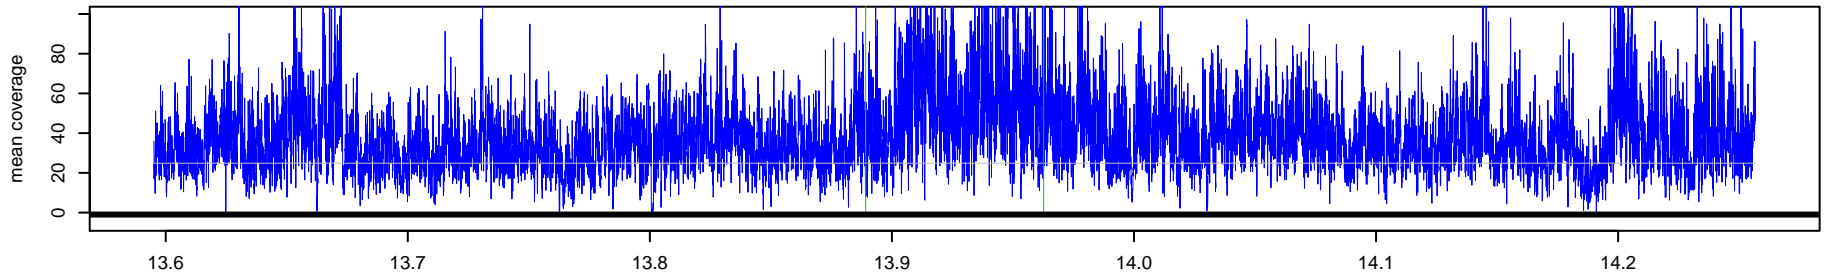

655\_NA10851 Chr 21 : 13889159 – 13962680 , 73522 bp (aCGH relative log2ratio= 0.54 )

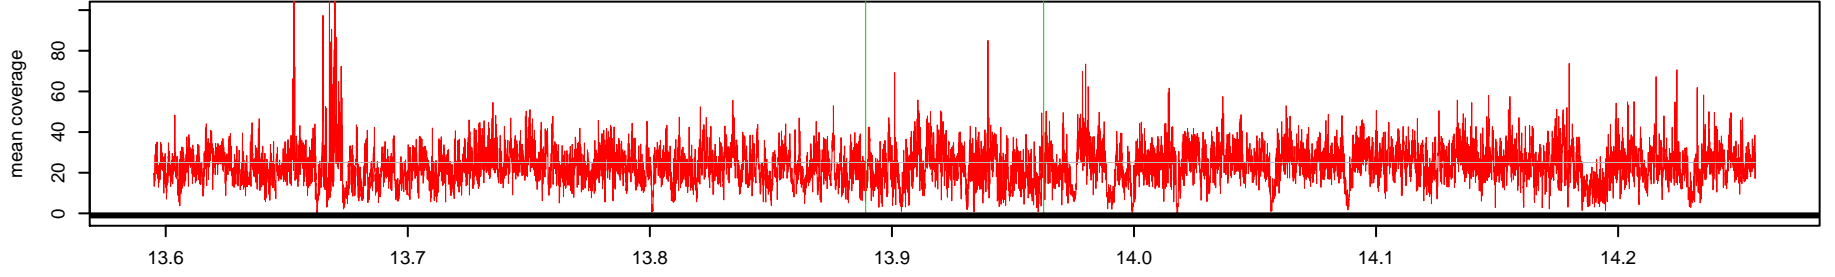

Log2( AK1 read depth / NA10851 read depth)

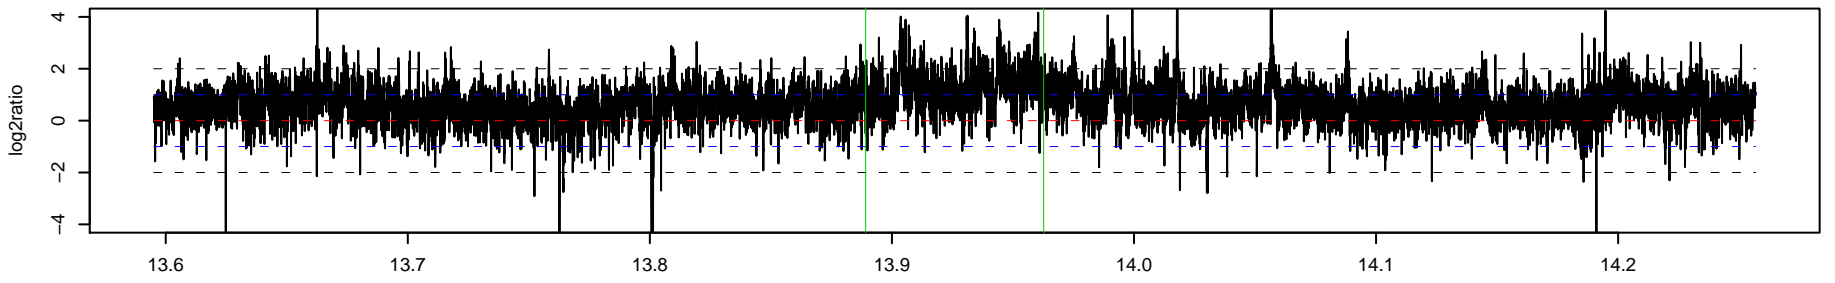

o

656\_AK1 Chr 21 : 15510225 – 15511920 , 1696 bp (aCGH relative log2ratio= 2.25 )

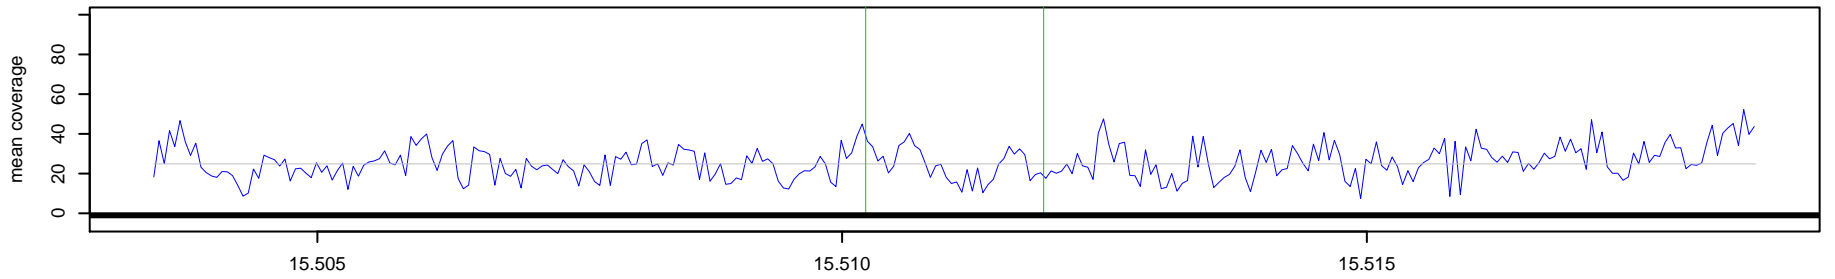

656\_NA10851 Chr 21 : 15510225 – 15511920 , 1696 bp (aCGH relative log2ratio= 2.25 )

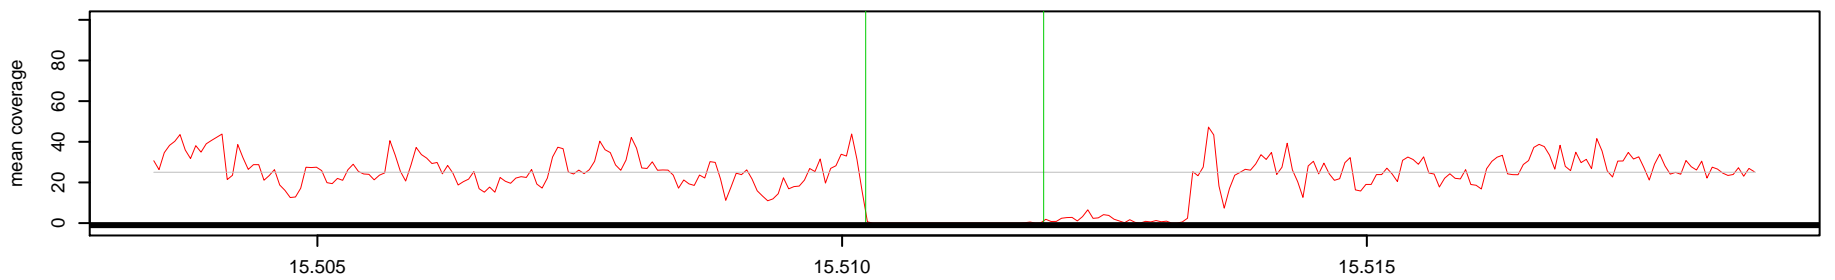

Log2( AK1 read depth / NA10851 read depth)

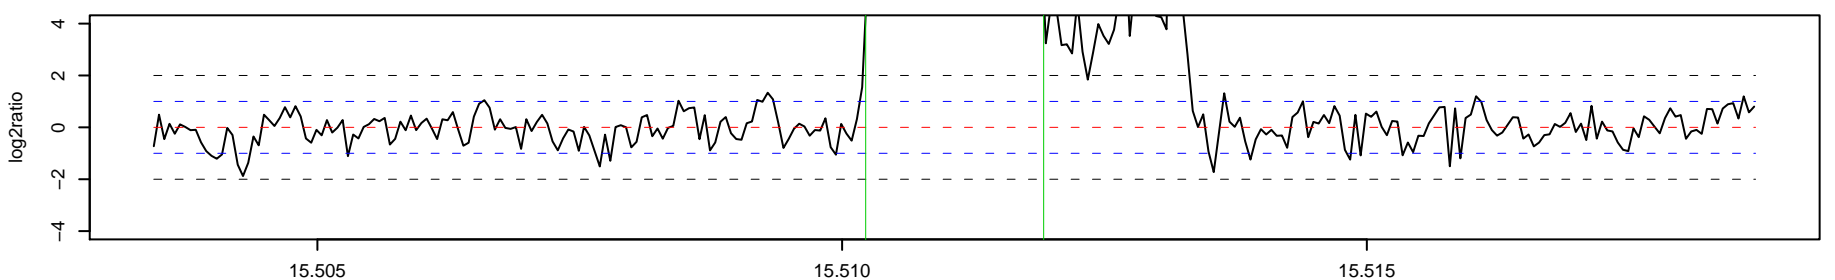

o

657 \_ AK1 Chr 21 : 22576881 – 22587644 , 10764 bp (aCGH relative log2ratio= -0.67 )

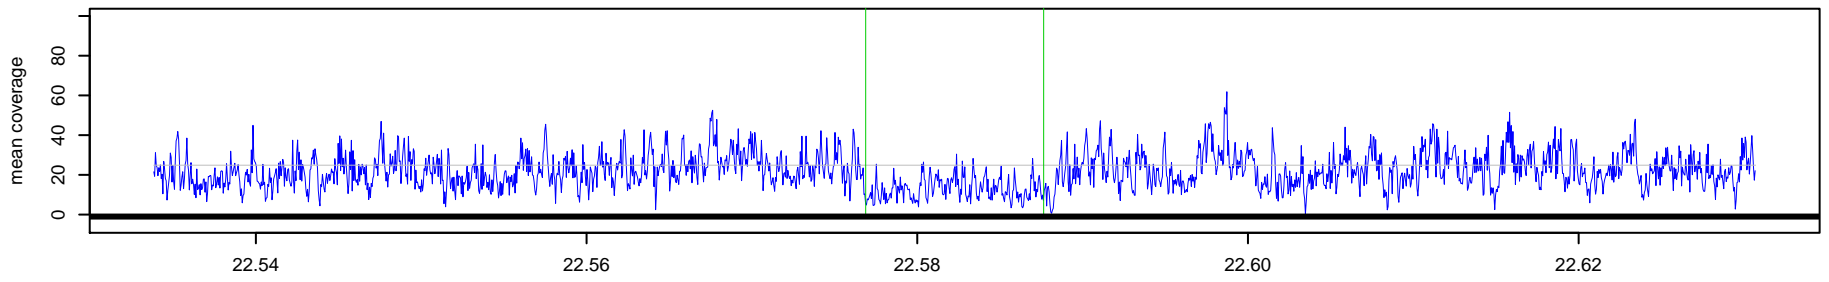

657 \_ NA10851 Chr 21 : 22576881 – 22587644 , 10764 bp (aCGH relative log2ratio= -0.67 )

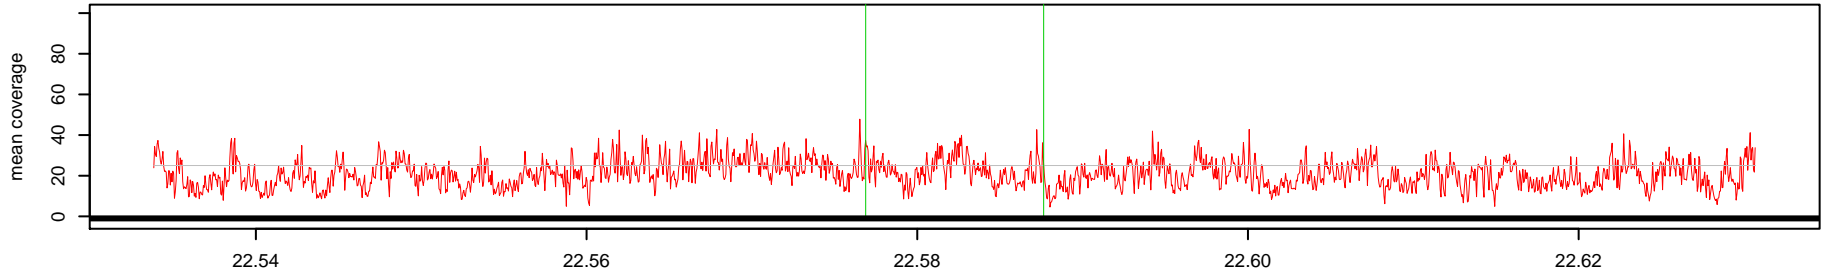

Log2( AK1 read depth / NA10851 read depth)

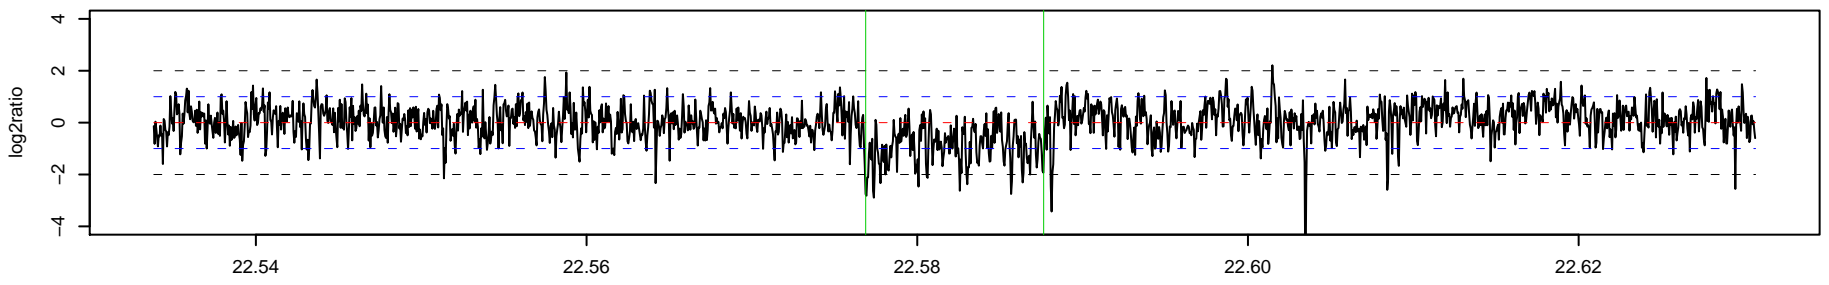

658 \_ AK1 Chr 21 : 24429284 – 24429873 , 590 bp (aCGH relative log2ratio= -0.72 )

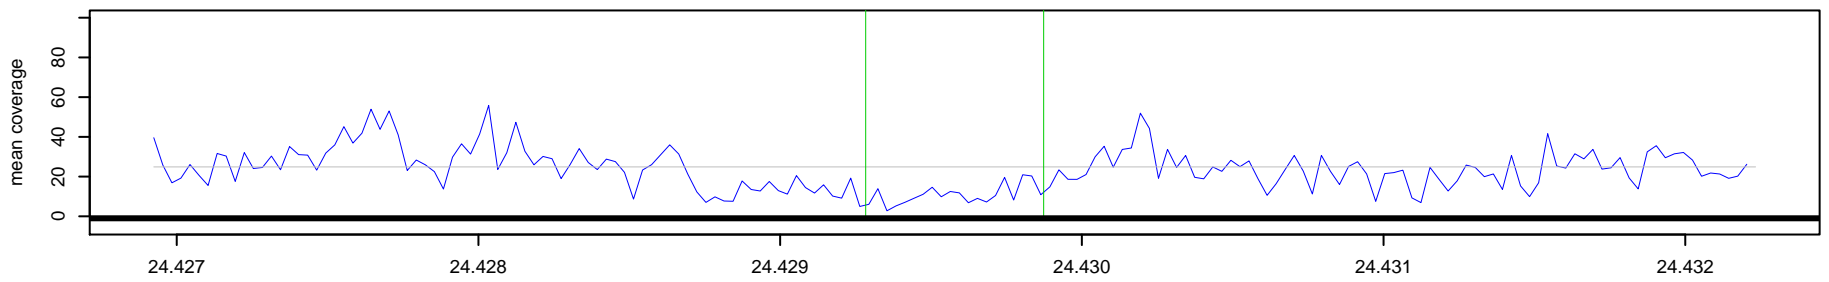

658 \_ NA10851 Chr 21 : 24429284 – 24429873 , 590 bp (aCGH relative log2ratio= -0.72 )

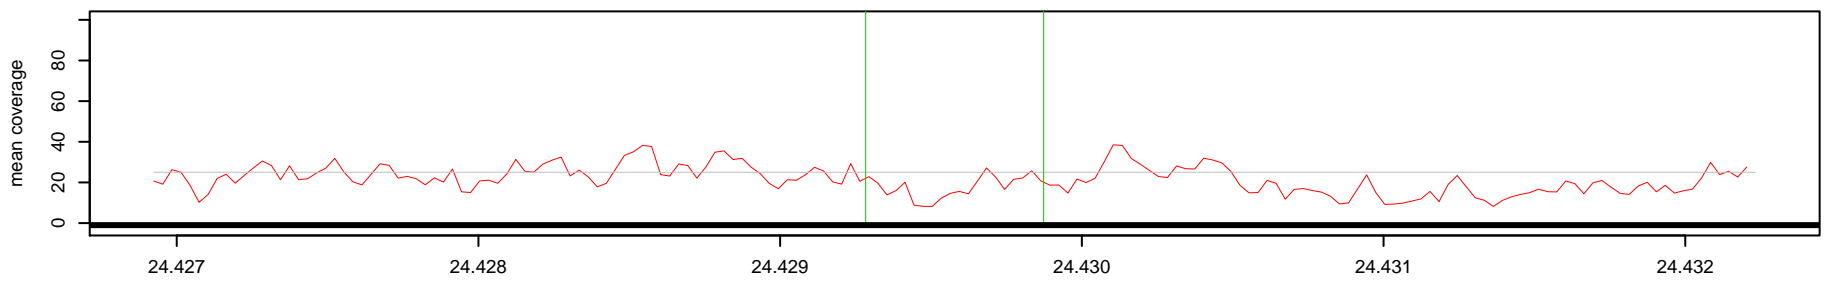

Log2( AK1 read depth / NA10851 read depth)

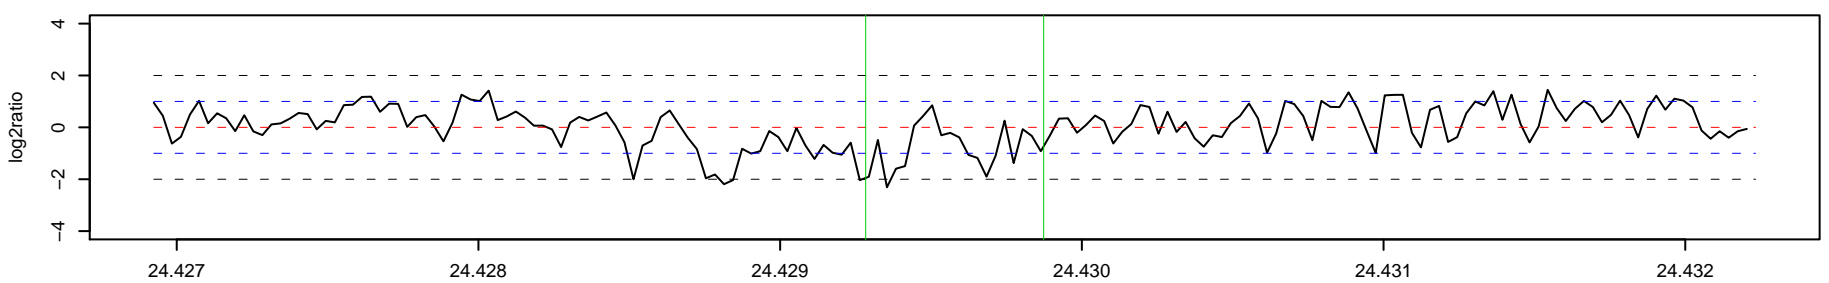

659\_AK1 Chr 21 : 31590086 - 31592028 , 1943 bp (aCGH relative log2ratio= -0.64 )

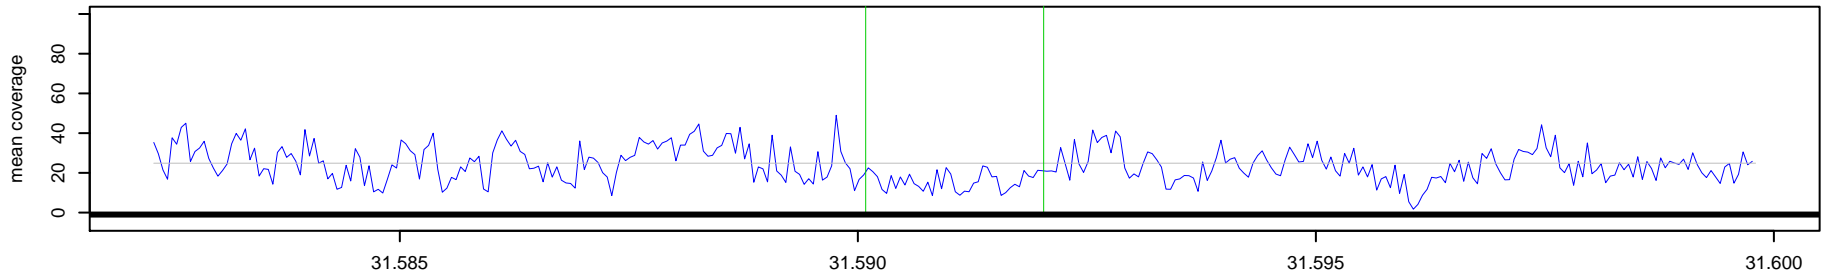

659\_NA10851 Chr 21 : 31590086 - 31592028 , 1943 bp (aCGH relative log2ratio= -0.64 )

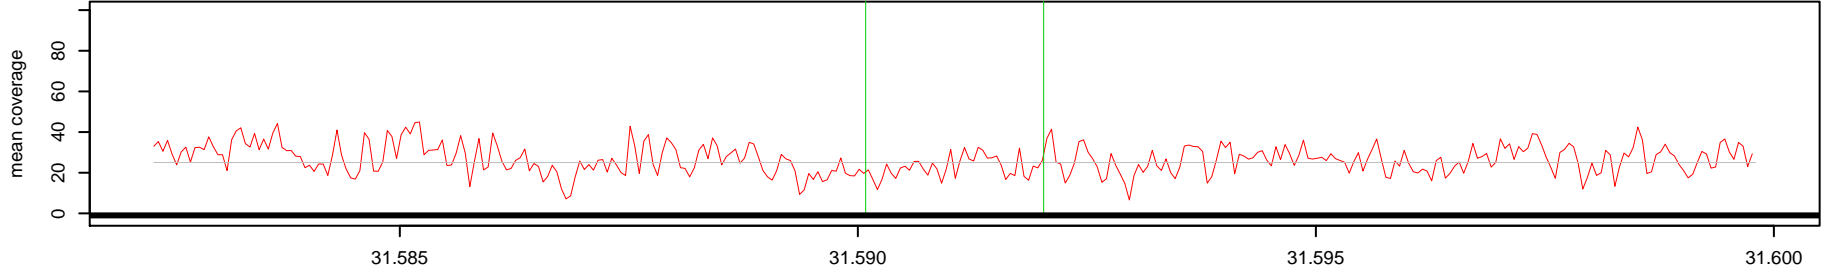

Log2( AK1 read depth / NA10851 read depth)

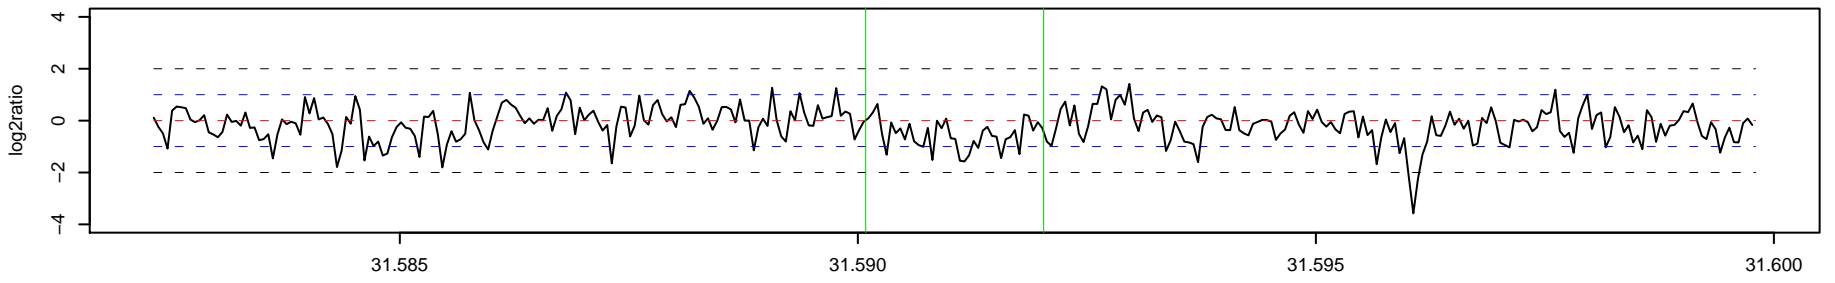

660\_AK1 Chr 21 : 43647155 - 43661056 , 13902 bp (aCGH relative log2ratio= -0.49 )

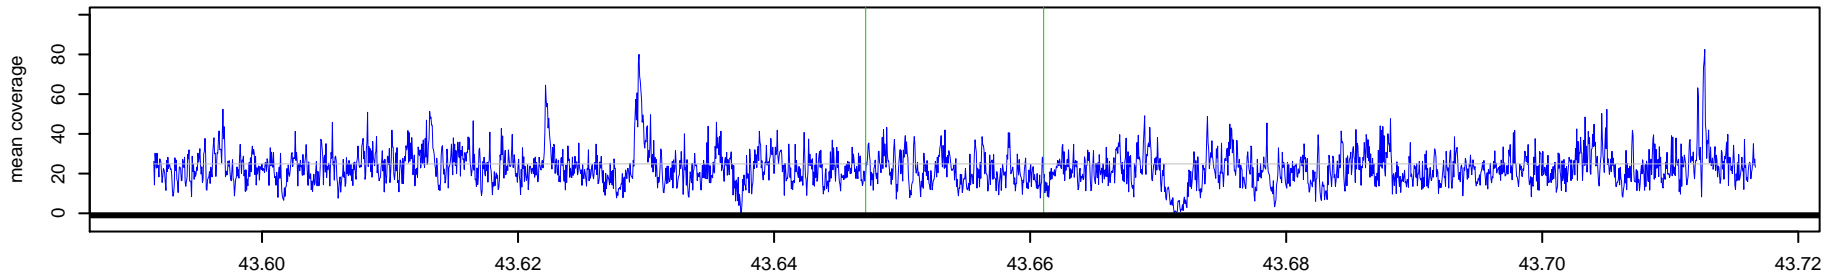

660\_NA10851 Chr 21 : 43647155 - 43661056 , 13902 bp (aCGH relative log2ratio= -0.49 )

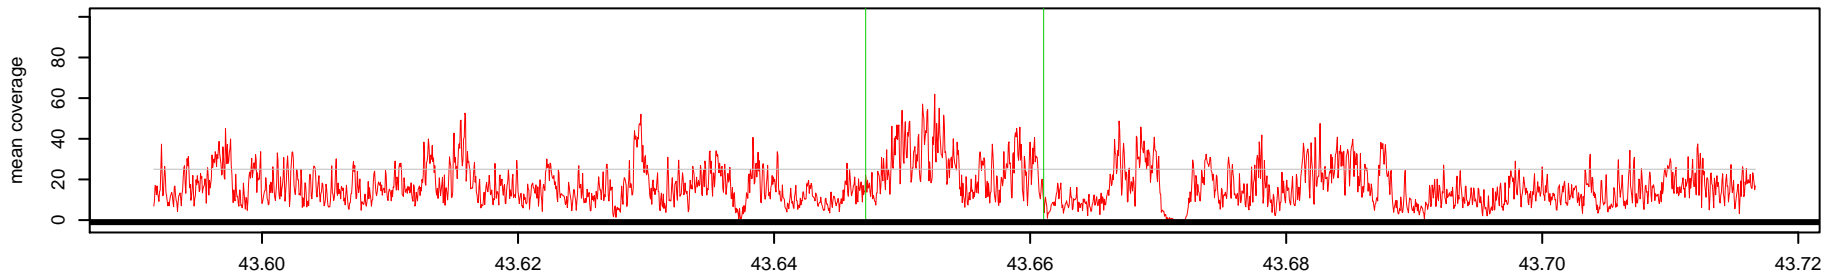

Log2( AK1 read depth / NA10851 read depth)

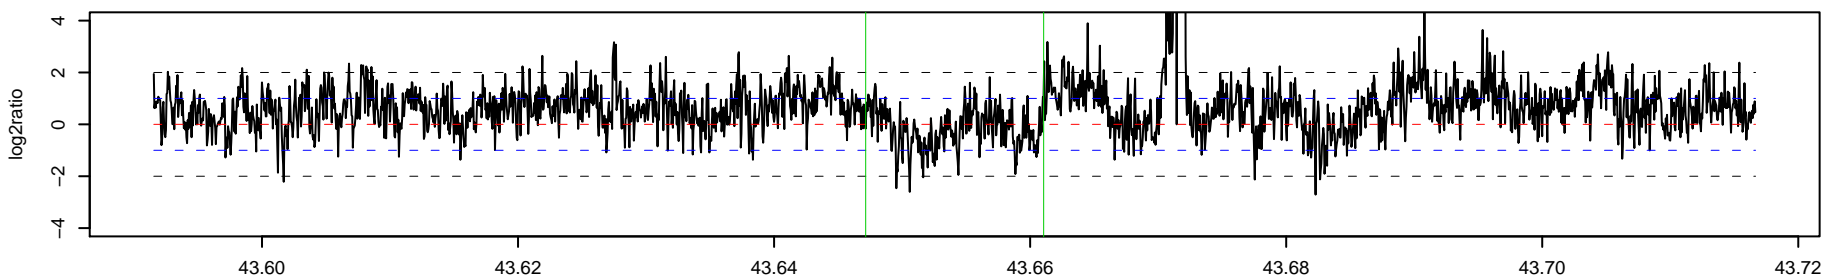

661\_AK1 Chr 22 : 16383539 – 16384115 , 577 bp (aCGH relative log2ratio= 1.18 )

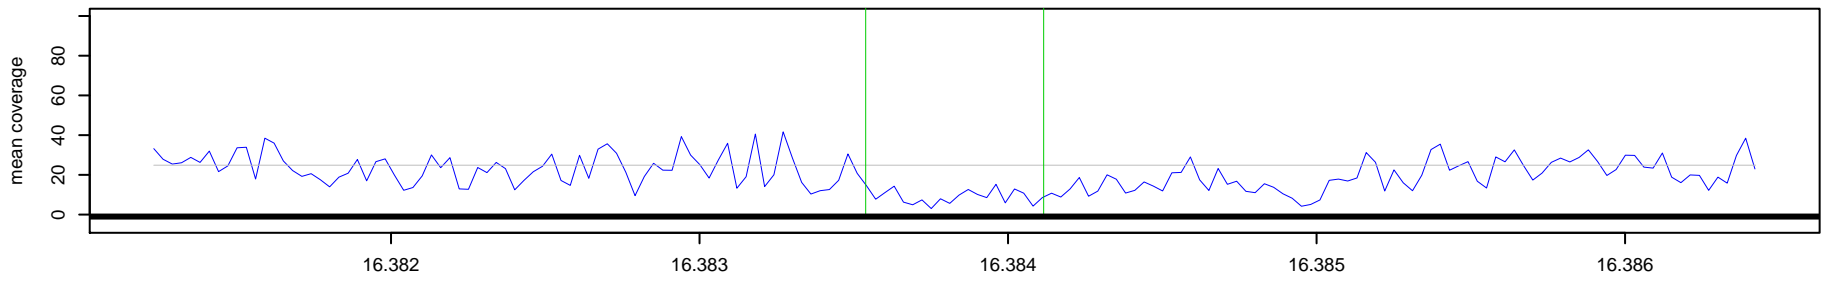

661\_NA10851 Chr 22 : 16383539 – 16384115 , 577 bp (aCGH relative log2ratio= 1.18 )

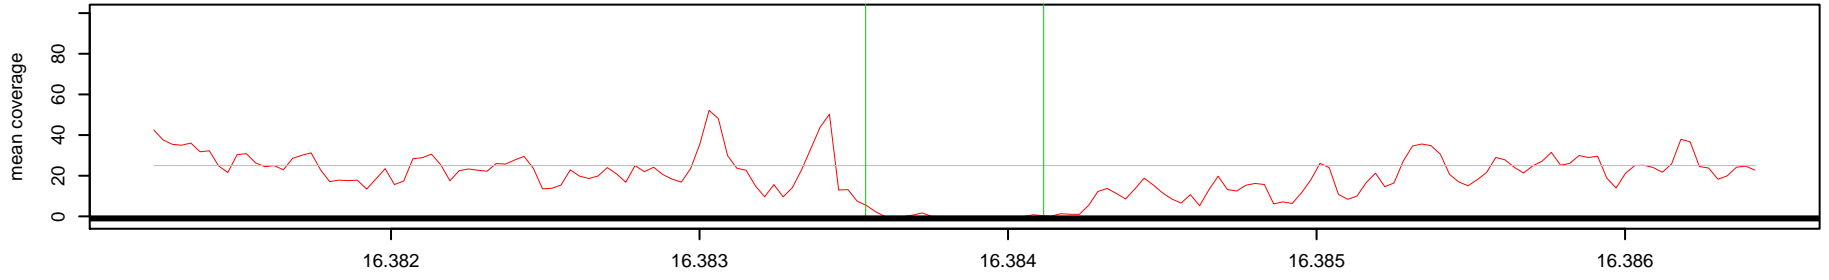

Log2( AK1 read depth / NA10851 read depth)

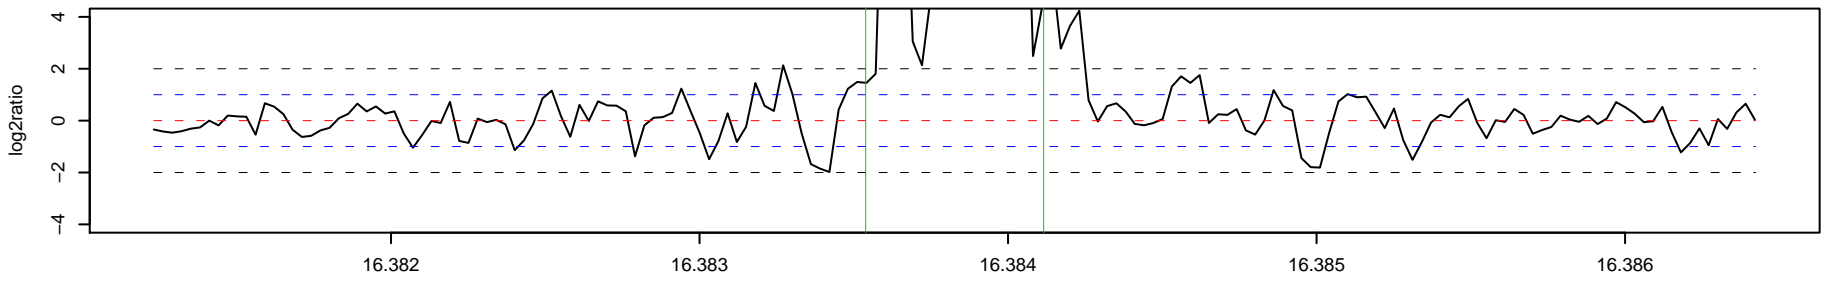

o

o

662\_AK1 Chr 22 : 16522258 – 16524591 , 2334 bp (aCGH relative log2ratio= 0.69 )

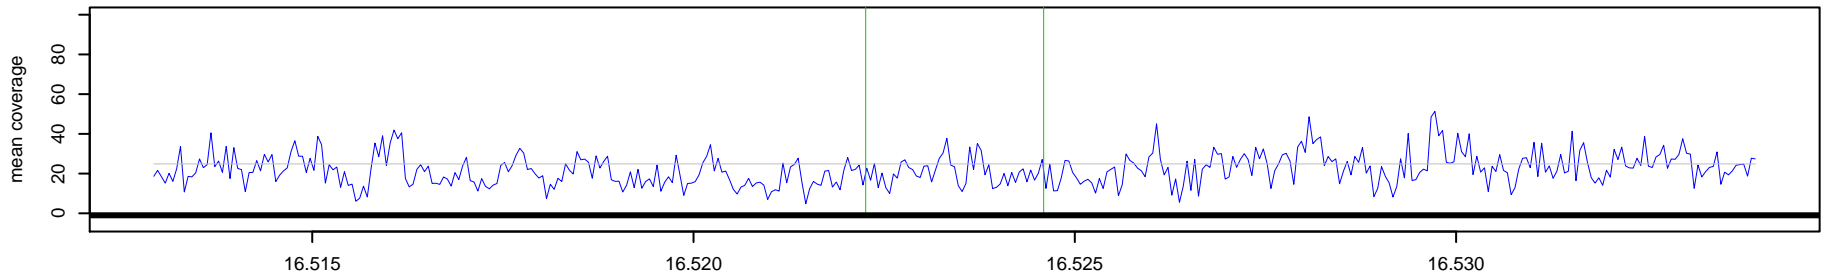

662\_NA10851 Chr 22 : 16522258 – 16524591 , 2334 bp (aCGH relative log2ratio= 0.69 )

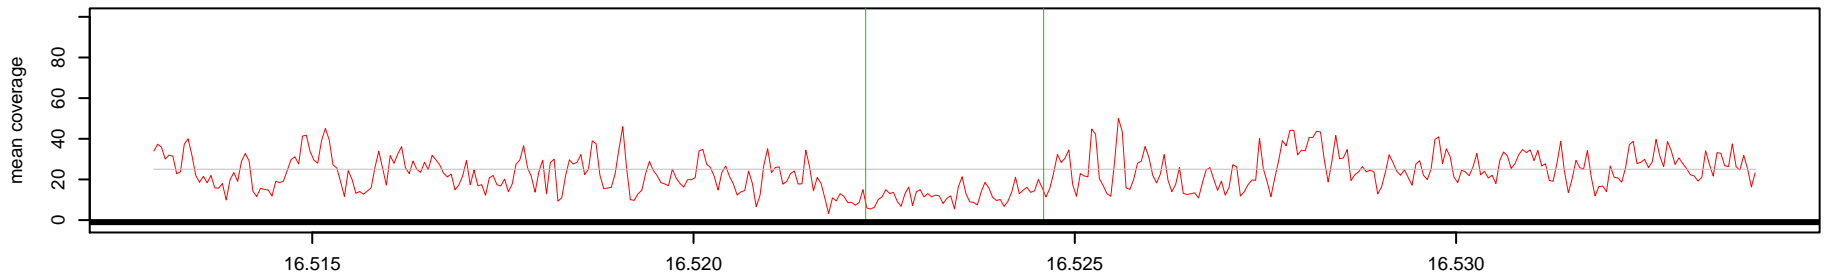

Log2( AK1 read depth / NA10851 read depth)

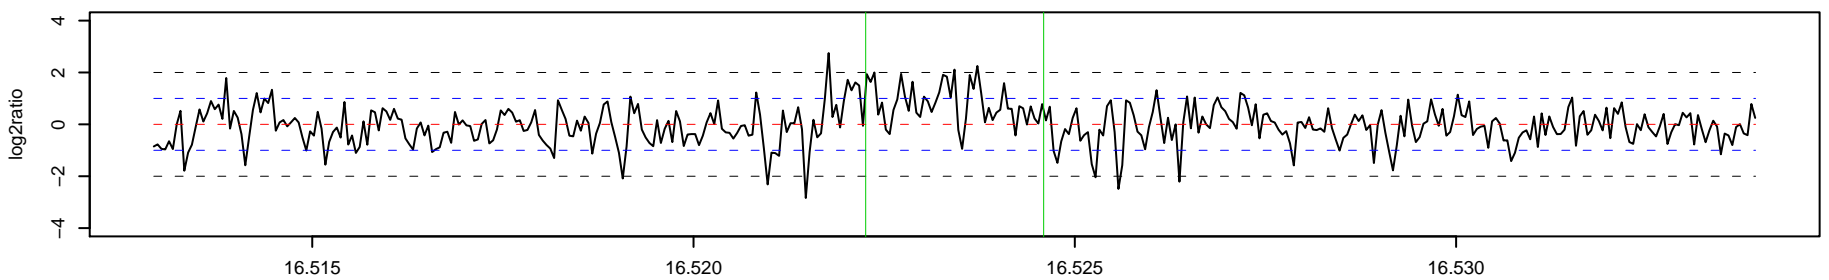

663\_AK1 Chr 22 : 19229719 – 19233881 , 4163 bp (aCGH relative log2ratio= 0.69 )

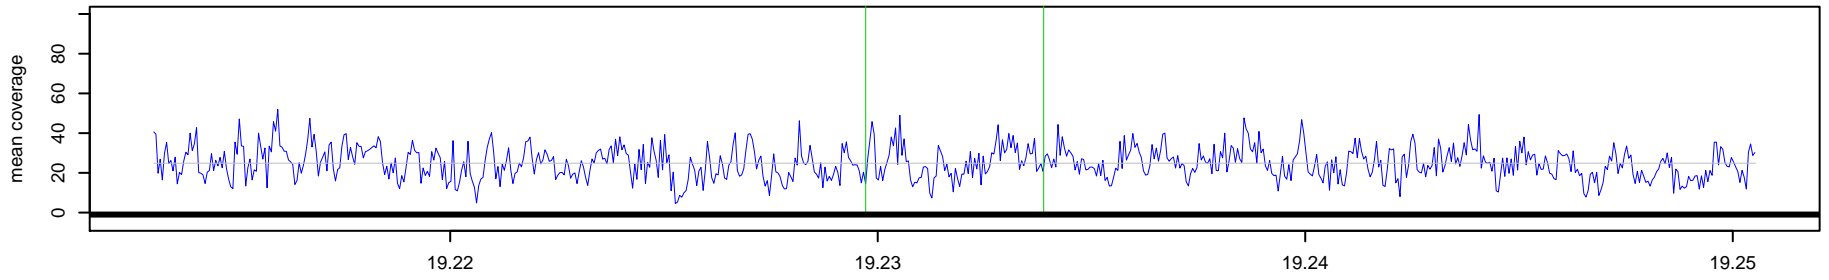

663\_NA10851 Chr 22 : 19229719 – 19233881 , 4163 bp (aCGH relative log2ratio= 0.69 )

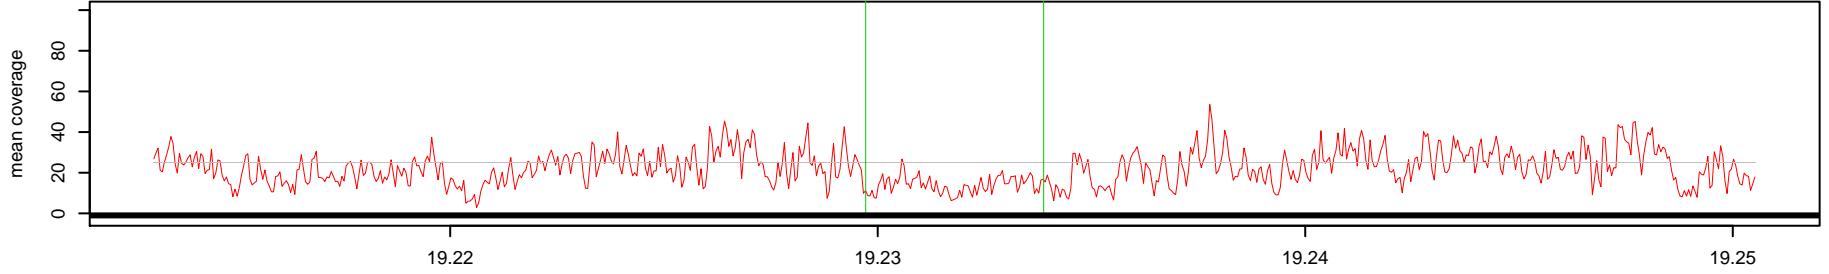

Log2( AK1 read depth / NA10851 read depth)

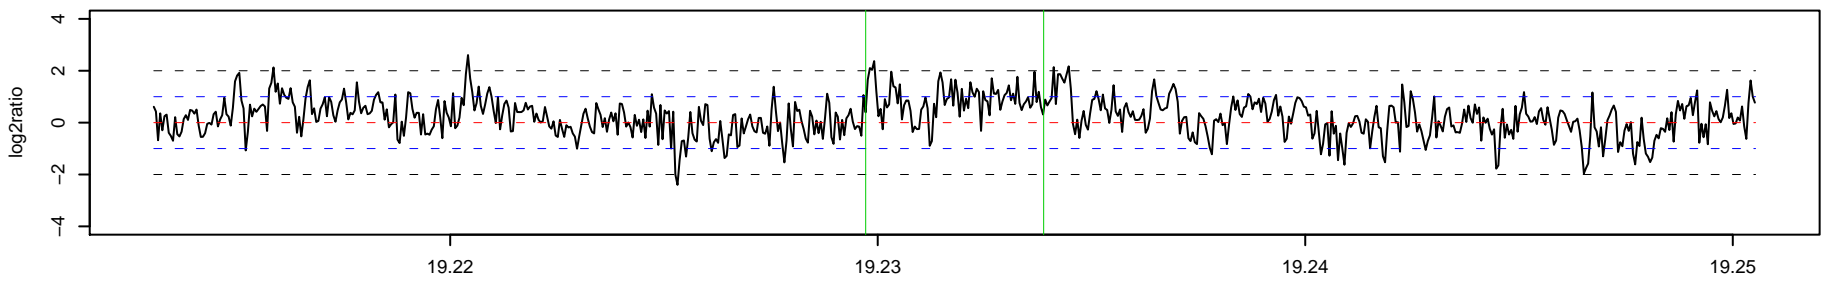

664\_AK1 Chr 22 : 20783565 – 21577178 , 793614 bp (aCGH relative log2ratio= 0.61 )

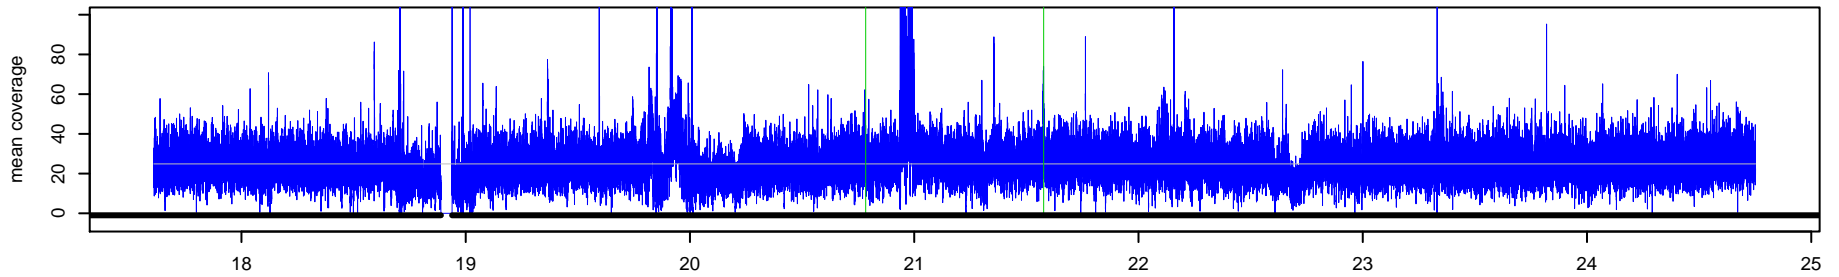

664\_NA10851 Chr 22 : 20783565 – 21577178 , 793614 bp (aCGH relative log2ratio= 0.61 )

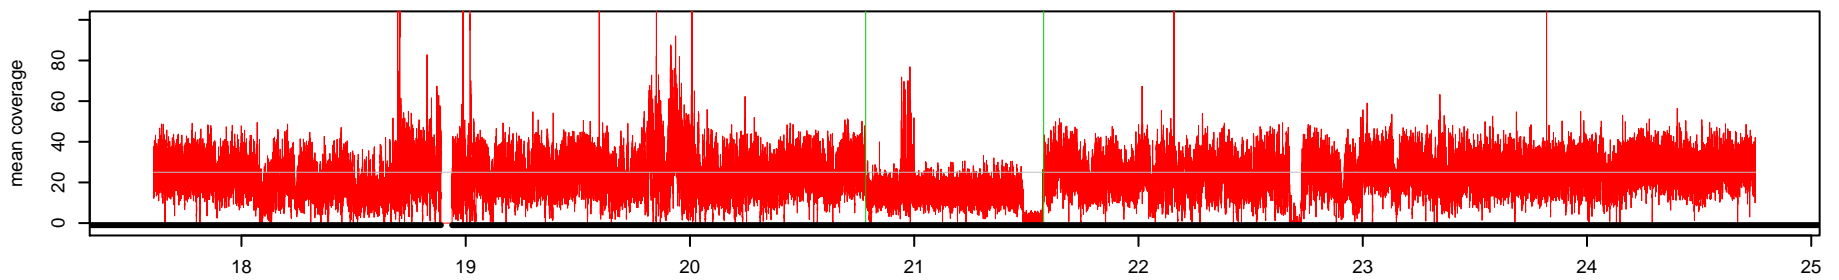

Log2( AK1 read depth / NA10851 read depth)

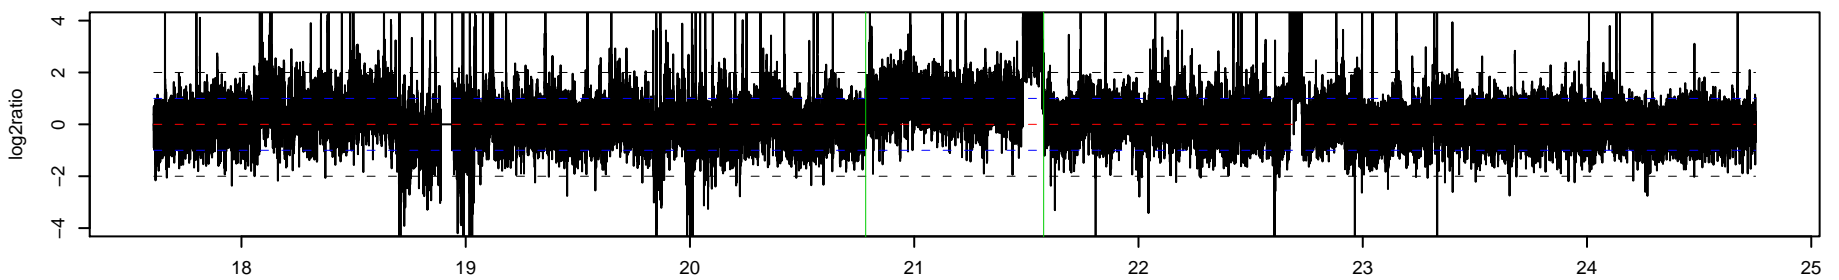



665\_AK1 Chr 22 : 21484683 – 21576911 , 92229 bp (aCGH relative log2ratio= 1.31 )

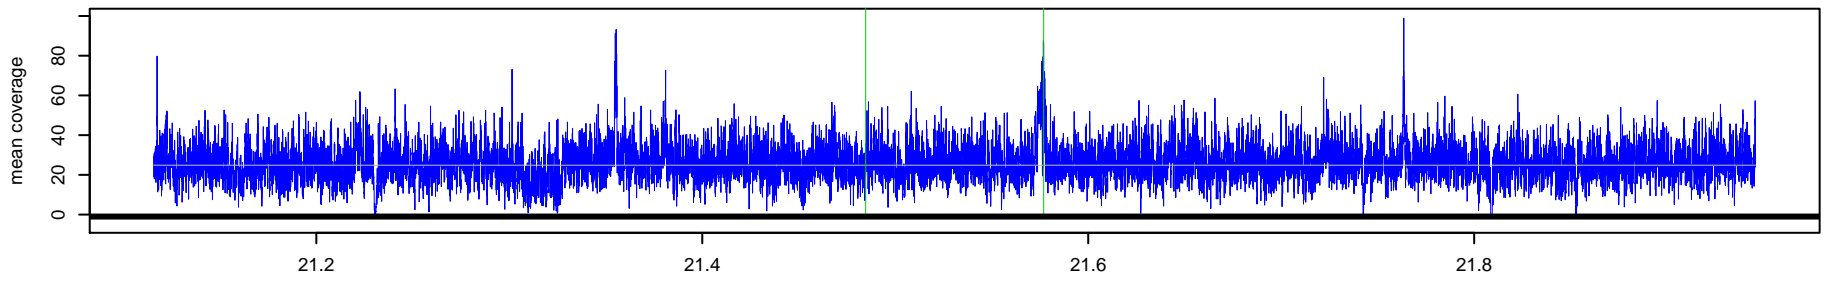

665\_NA10851 Chr 22 : 21484683 – 21576911 , 92229 bp (aCGH relative log2ratio= 1.31 )

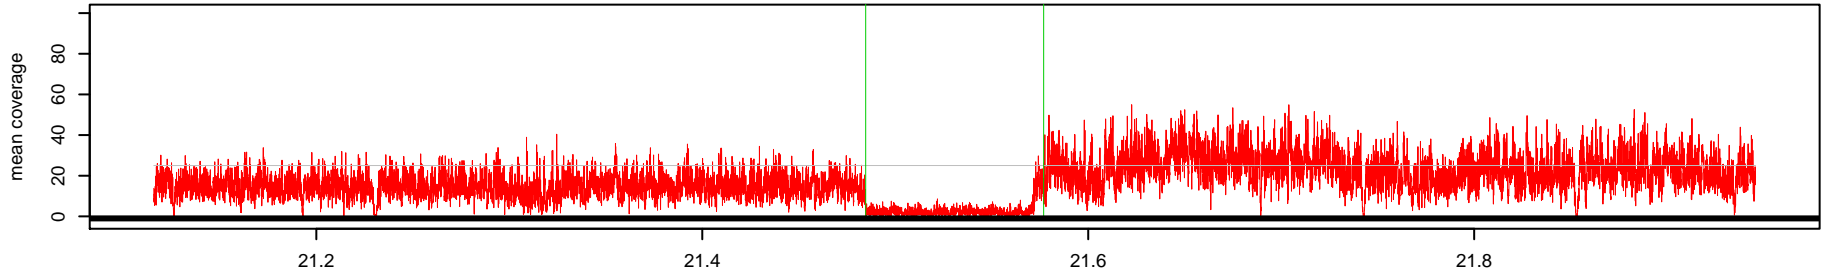

Log2( AK1 read depth / NA10851 read depth)

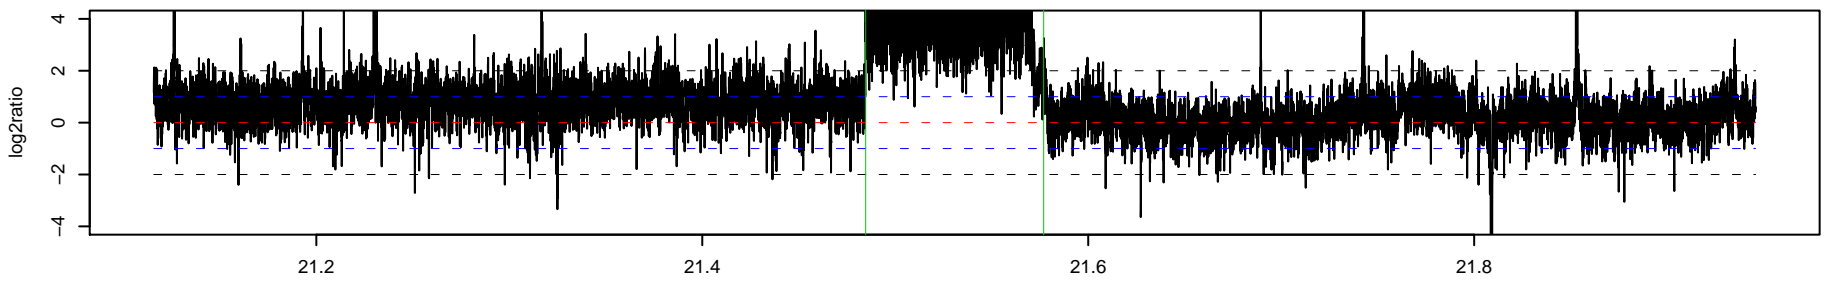

666\_AK1 Chr 22 : 21808398 – 21809108 , 711 bp (aCGH relative log2ratio= -2.86 )

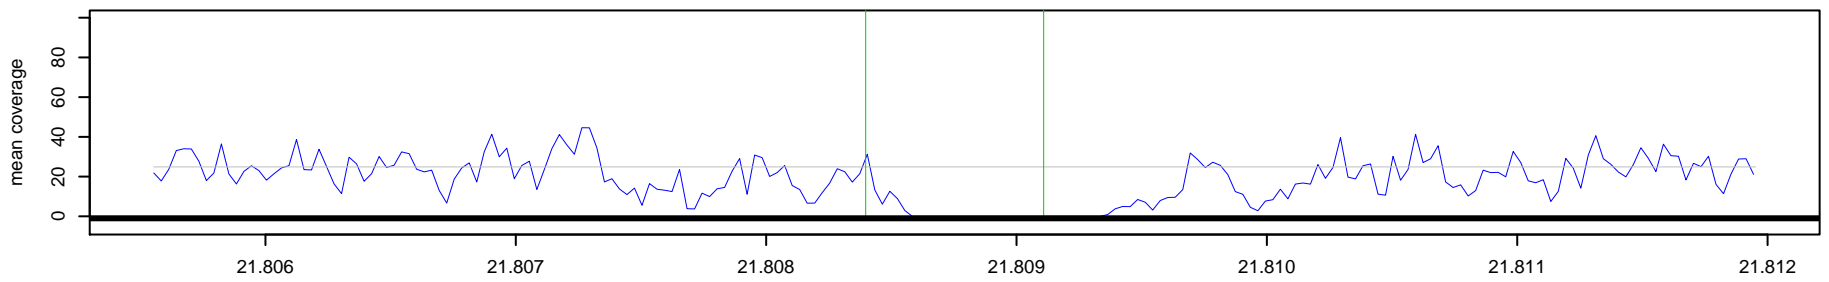

666\_NA10851 Chr 22 : 21808398 – 21809108 , 711 bp (aCGH relative log2ratio= -2.86 )

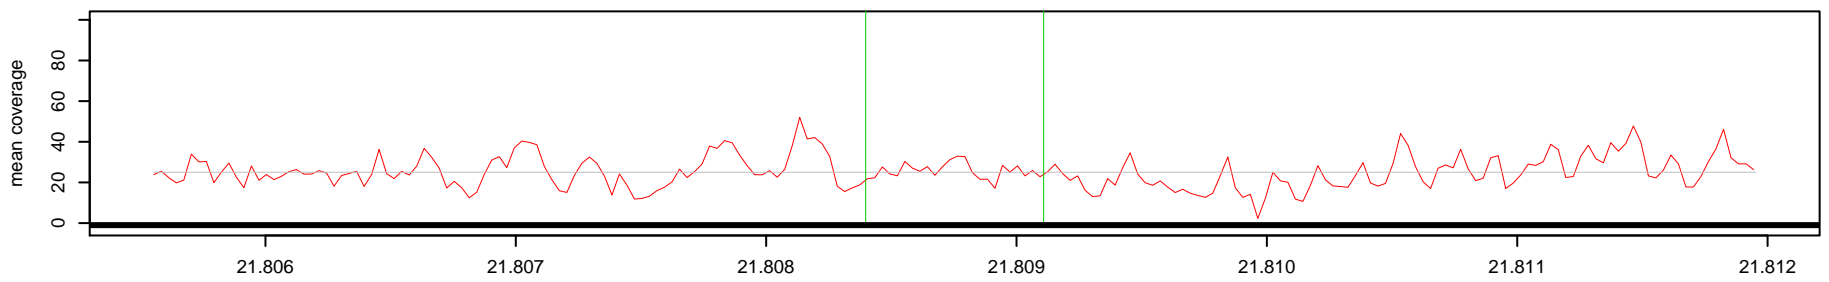

Log2( AK1 read depth / NA10851 read depth)

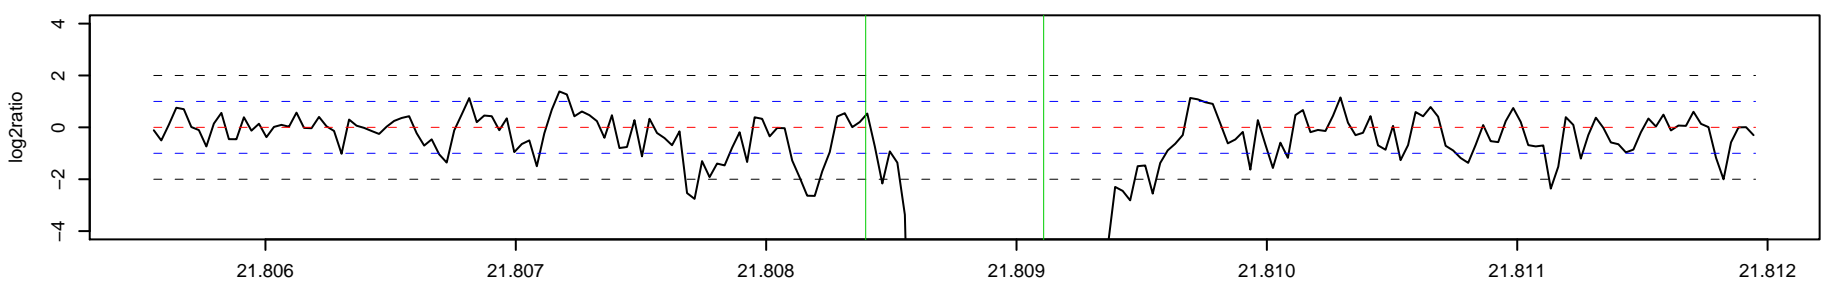

667\_AK1 Chr 22 : 22355576 - 22357427 , 1852 bp (aCGH relative log2ratio= 0.35 )

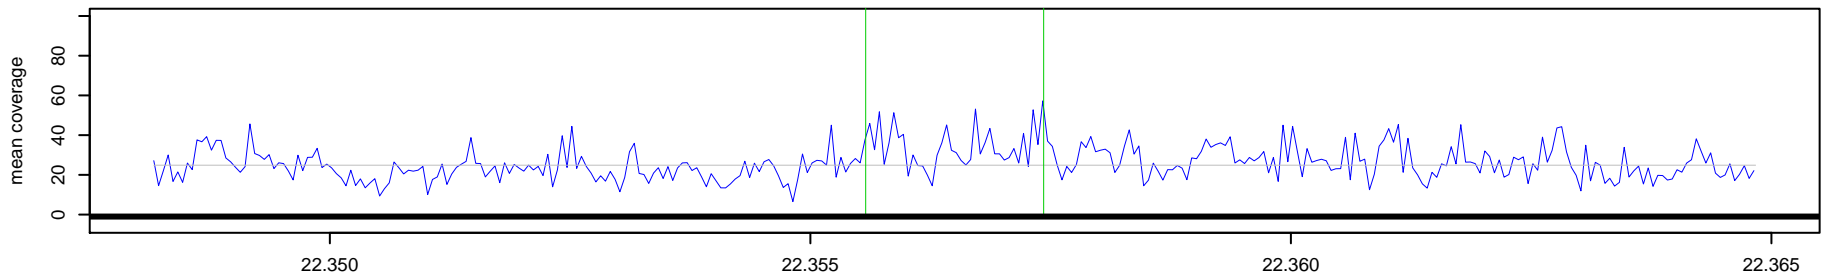

667\_NA10851 Chr 22 : 22355576 - 22357427 , 1852 bp (aCGH relative log2ratio= 0.35 )

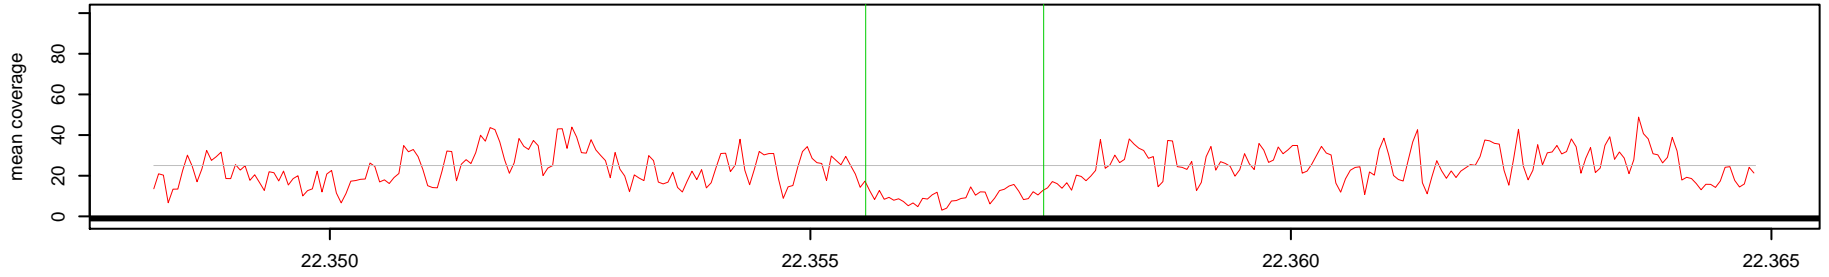

Log2( AK1 read depth / NA10851 read depth)

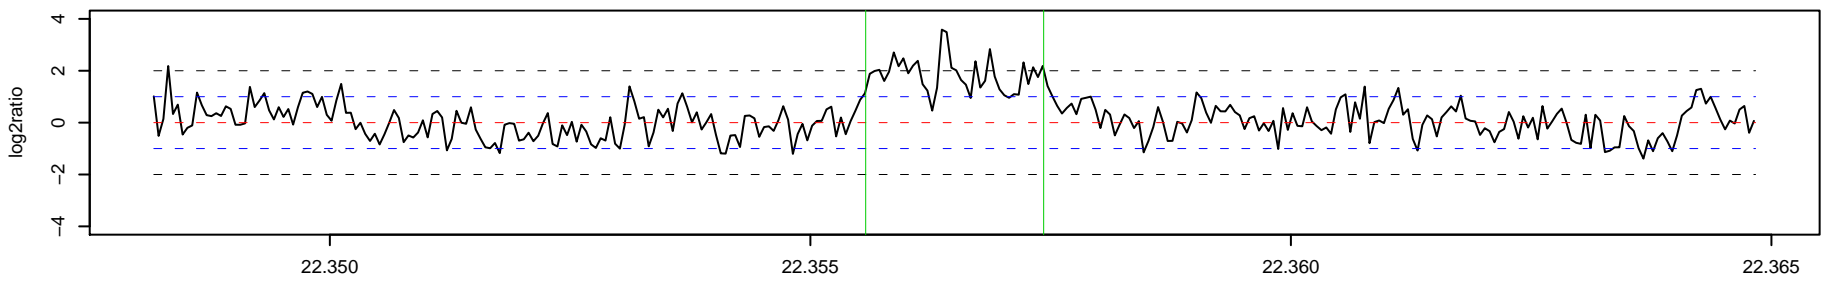

o

o

668\_AK1 Chr 22 : 22676441 - 22725680 , 49240 bp (aCGH relative log2ratio= 0.76 )

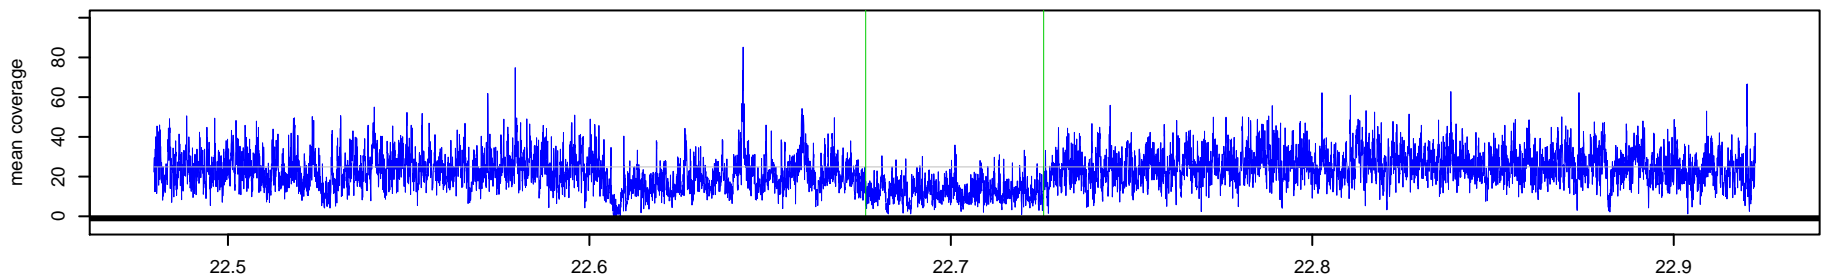

668\_NA10851 Chr 22 : 22676441 - 22725680 , 49240 bp (aCGH relative log2ratio= 0.76 )

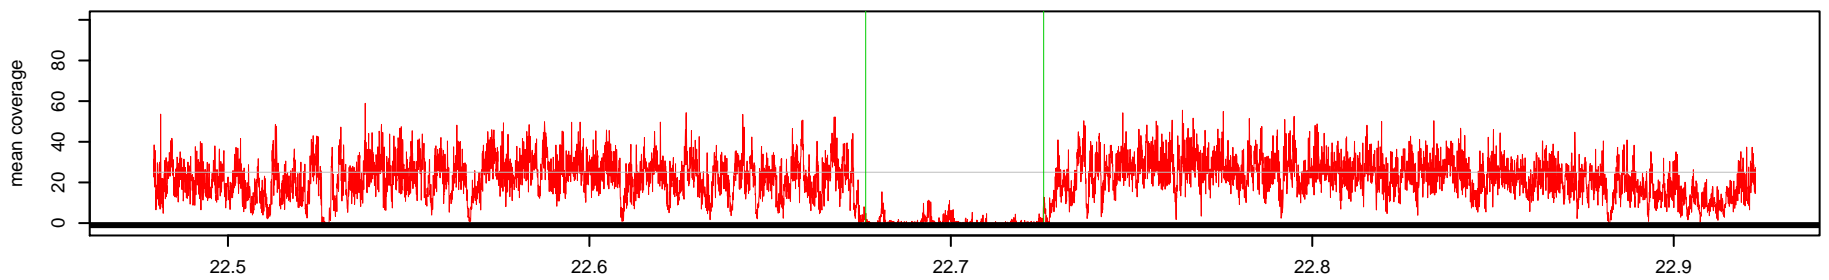

Log2( AK1 read depth / NA10851 read depth)

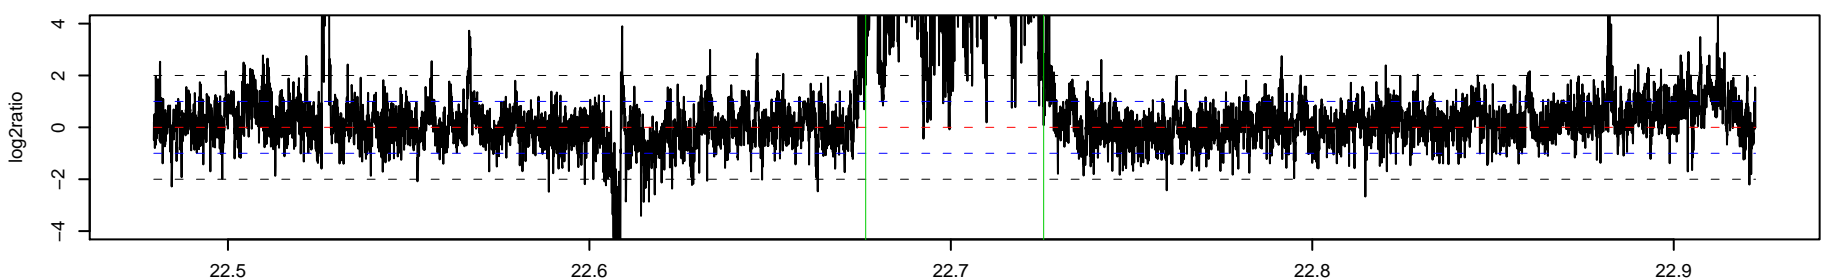

669\_AK1 Chr 22 : 27395128 - 27396058 , 931 bp (aCGH relative log2ratio= -0.53 )

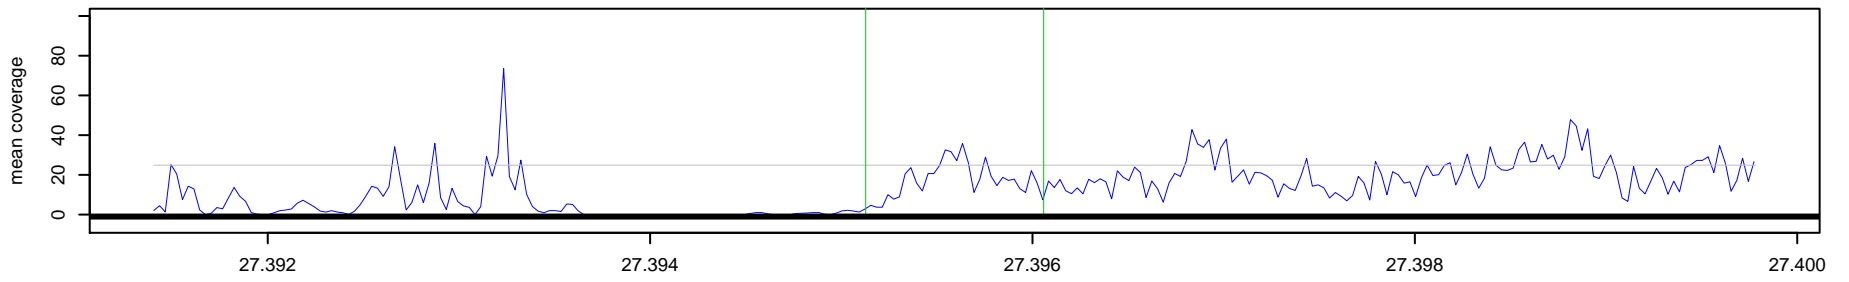

669\_NA10851 Chr 22 : 27395128 - 27396058 , 931 bp (aCGH relative log2ratio= -0.53 )

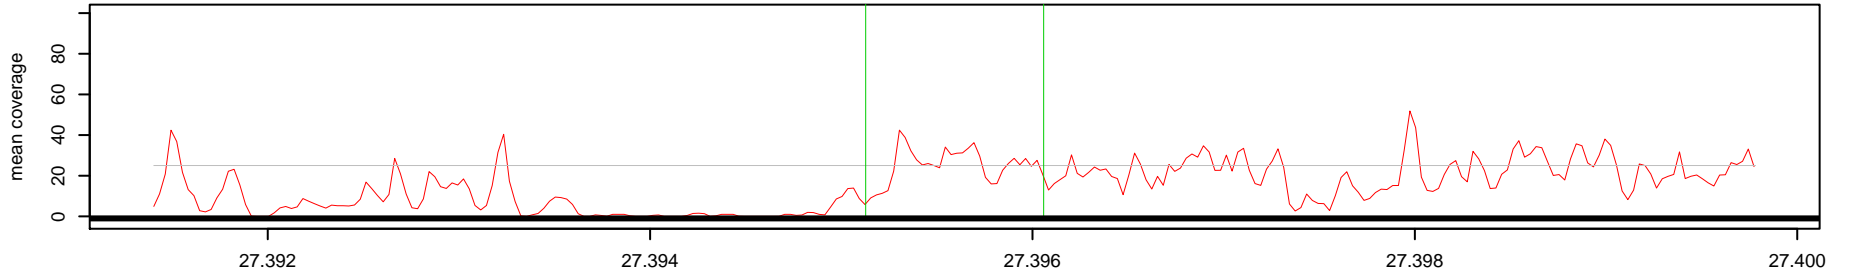

Log2( AK1 read depth / NA10851 read depth)

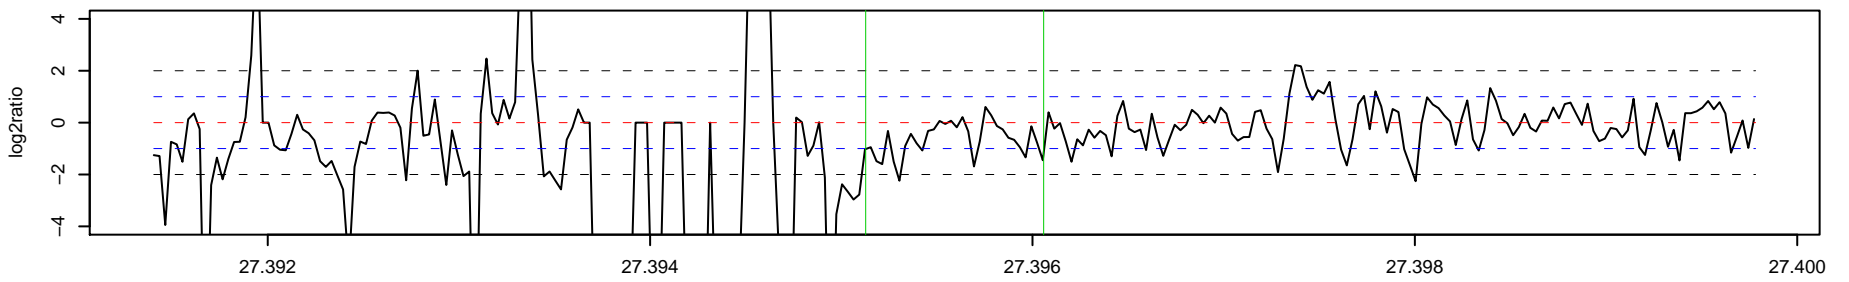

670\_AK1 Chr 22 : 28113405 - 28119515 , 6111 bp (aCGH relative log2ratio= -0.58 )

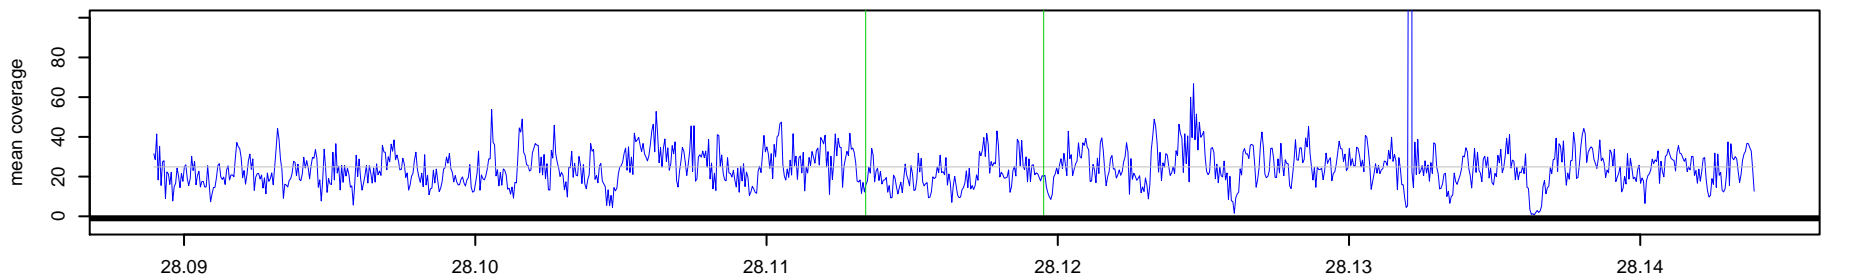

670\_NA10851 Chr 22 : 28113405 - 28119515 , 6111 bp (aCGH relative log2ratio= -0.58 )

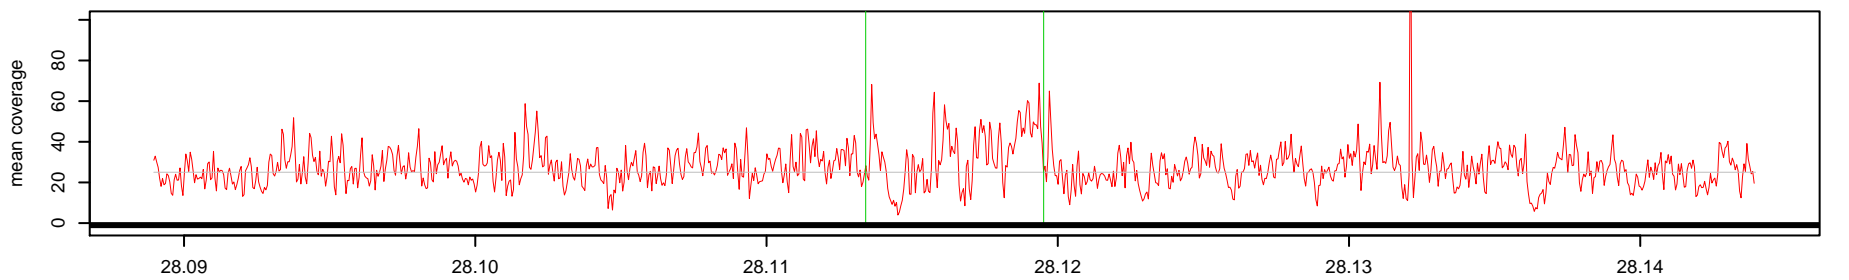

Log2( AK1 read depth / NA10851 read depth)

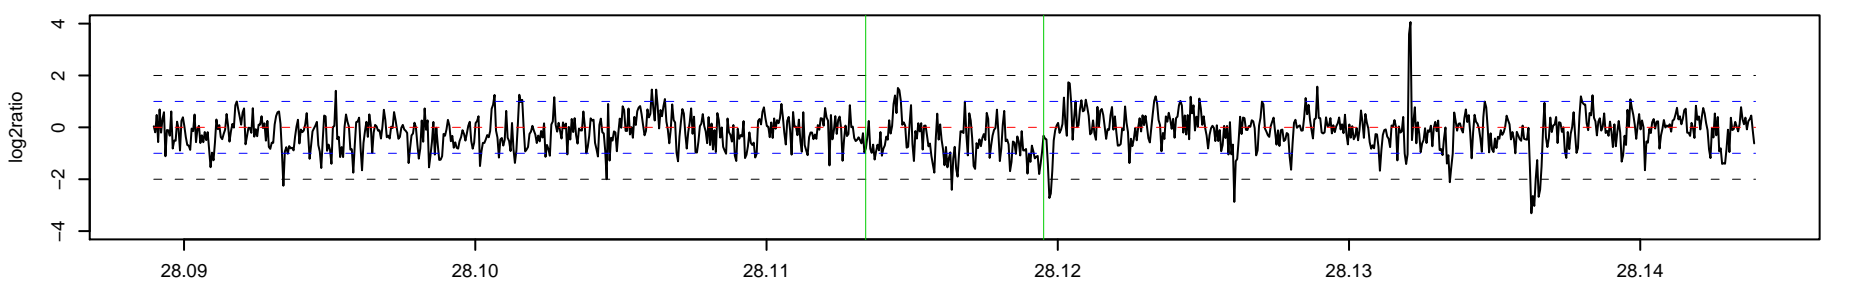

671\_AK1 Chr 22 : 28786513 – 28789421 , 2909 bp (aCGH relative log2ratio= 0.60 )

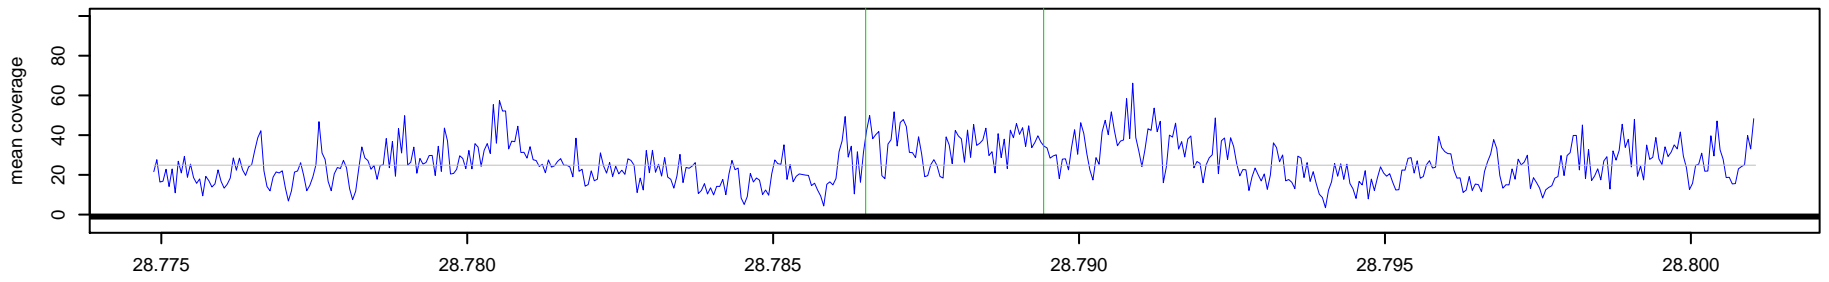

671\_NA10851 Chr 22 : 28786513 – 28789421 , 2909 bp (aCGH relative log2ratio= 0.60 )

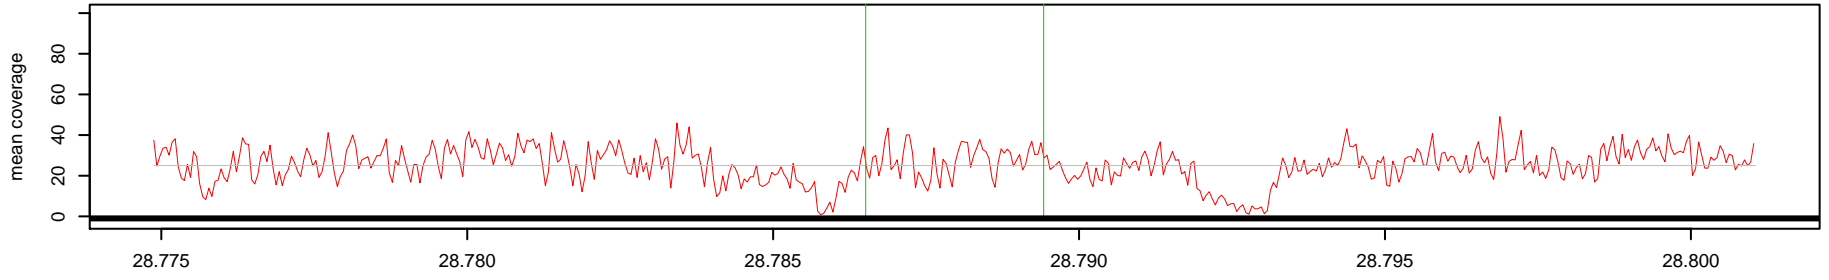

Log2( AK1 read depth / NA10851 read depth)

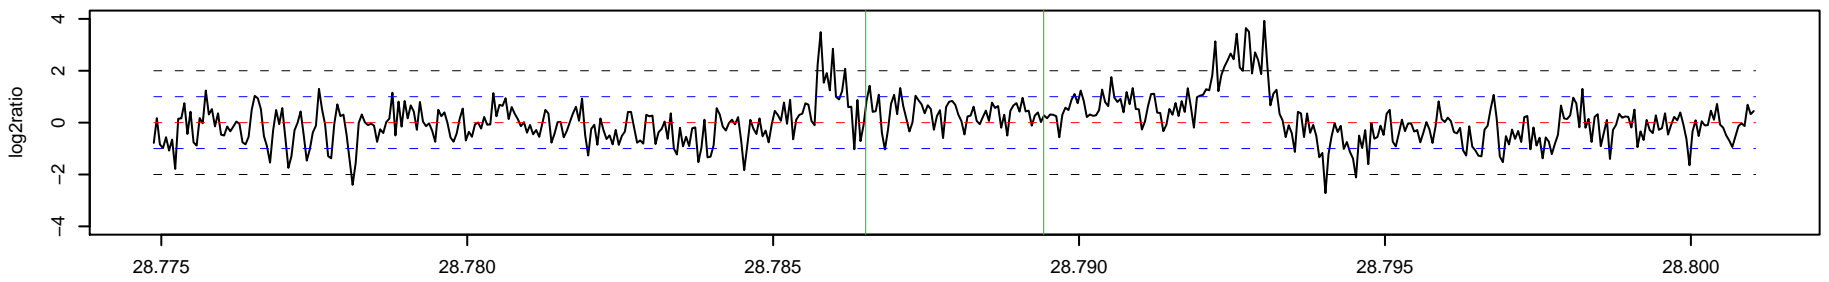

672\_AK1 Chr 22 : 32110406 – 32112910 , 2505 bp (aCGH relative log2ratio= 0.77 )

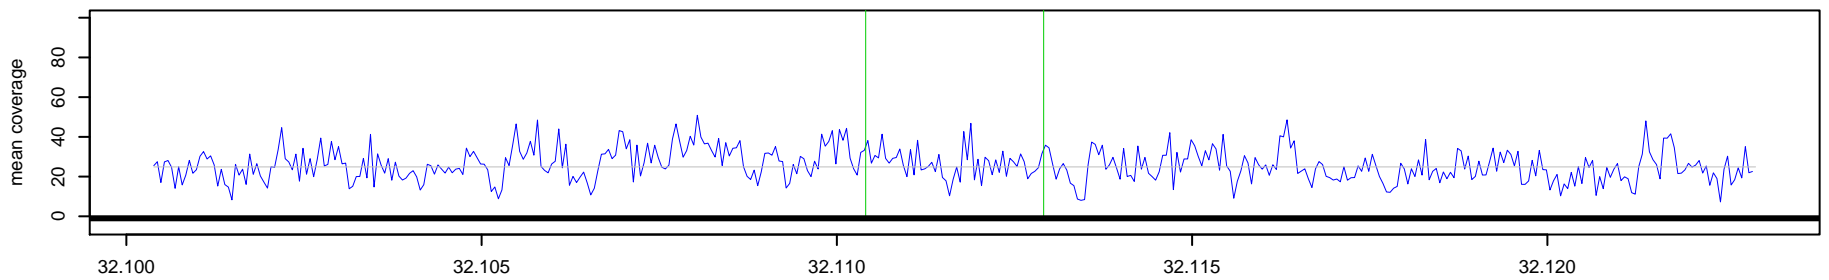

672\_NA10851 Chr 22 : 32110406 – 32112910 , 2505 bp (aCGH relative log2ratio= 0.77 )

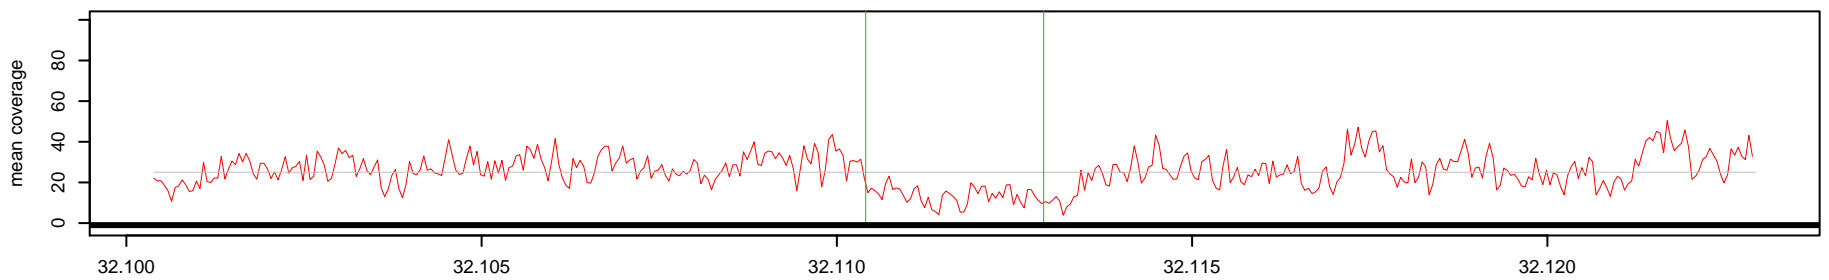

Log2( AK1 read depth / NA10851 read depth)

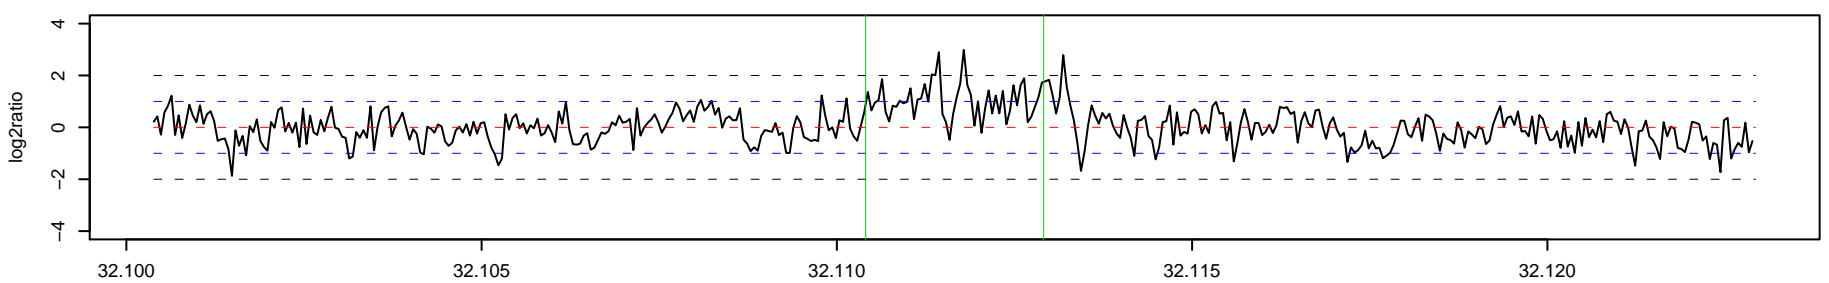

673\_AK1 Chr 22 : 33625069 – 33628891 , 3823 bp (aCGH relative log2ratio= 0.67 )

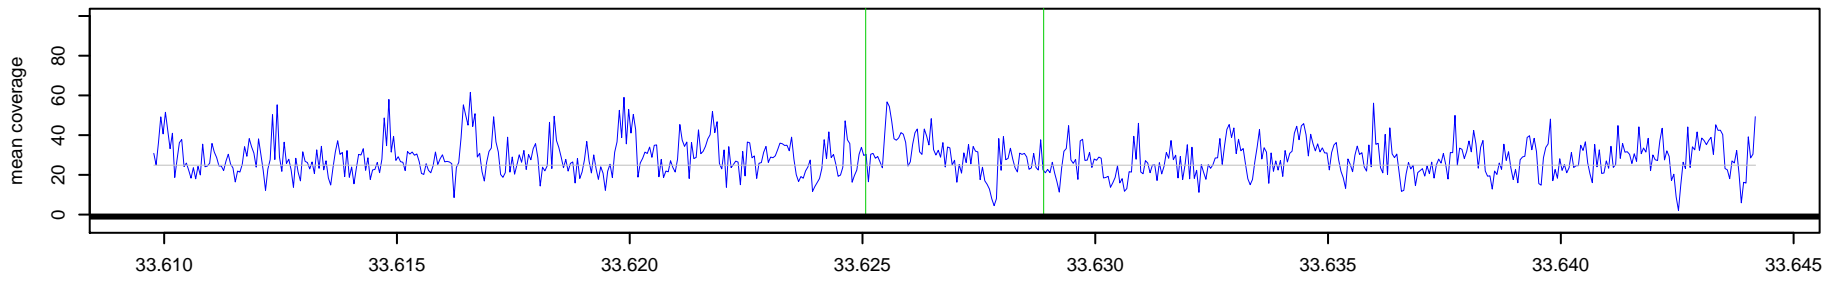

673\_NA10851 Chr 22 : 33625069 – 33628891 , 3823 bp (aCGH relative log2ratio= 0.67 )

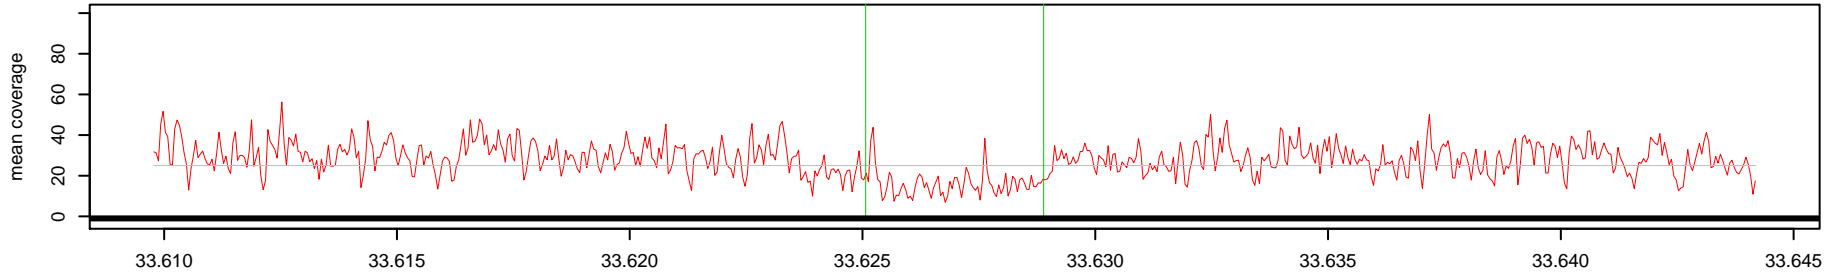

Log2( AK1 read depth / NA10851 read depth)

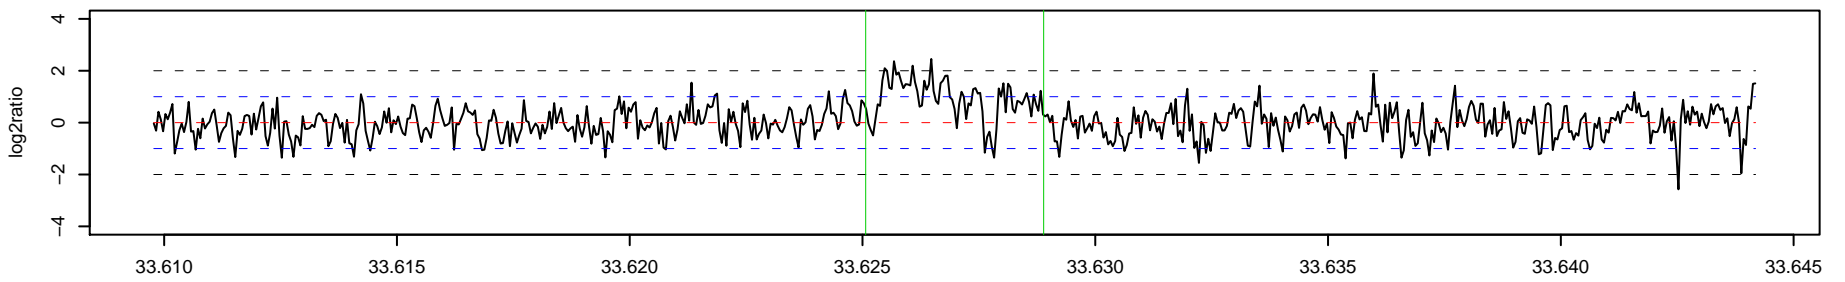

674\_AK1 Chr 22 : 35474632 – 35477142 , 2511 bp (aCGH relative log2ratio= 1.40 )

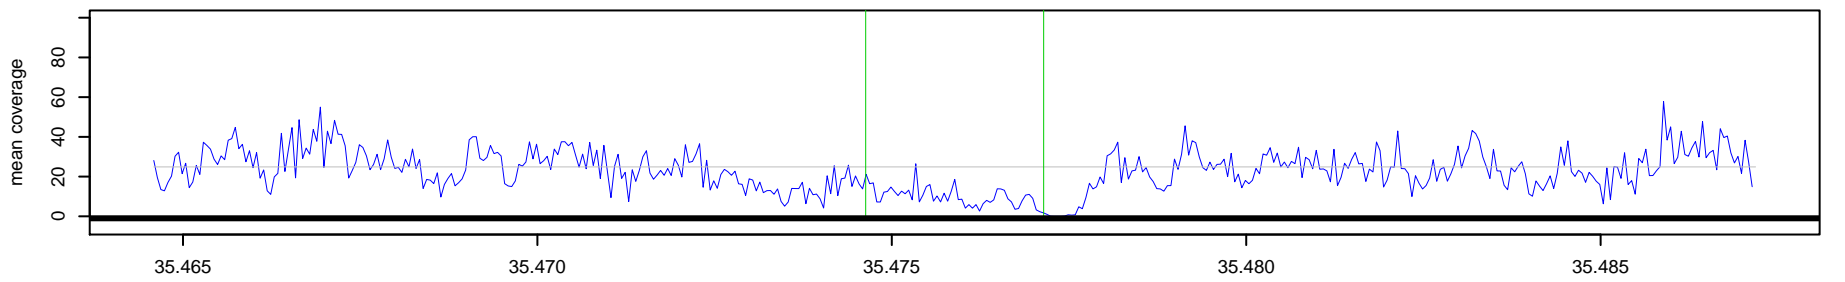

674\_NA10851 Chr 22 : 35474632 – 35477142 , 2511 bp (aCGH relative log2ratio= 1.40 )

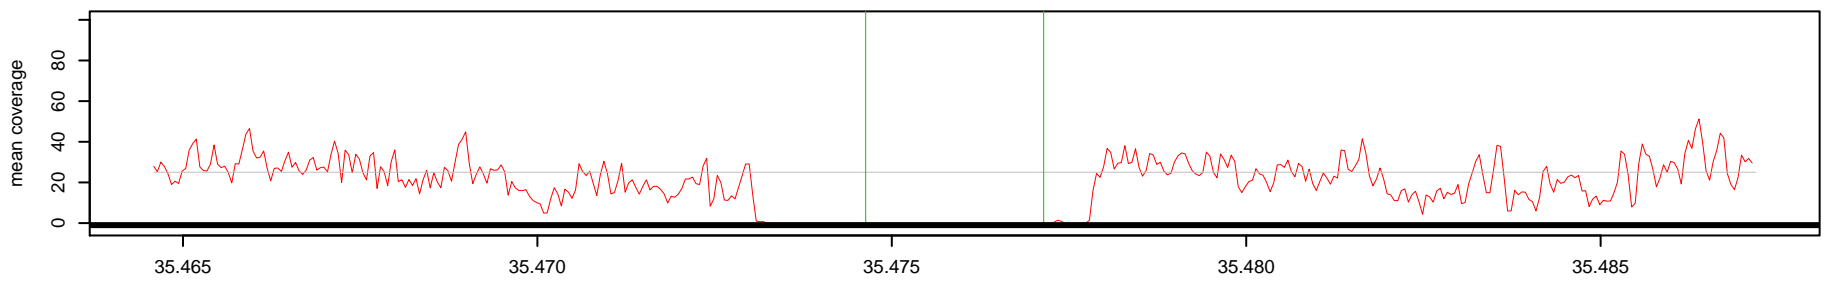

Log2( AK1 read depth / NA10851 read depth)

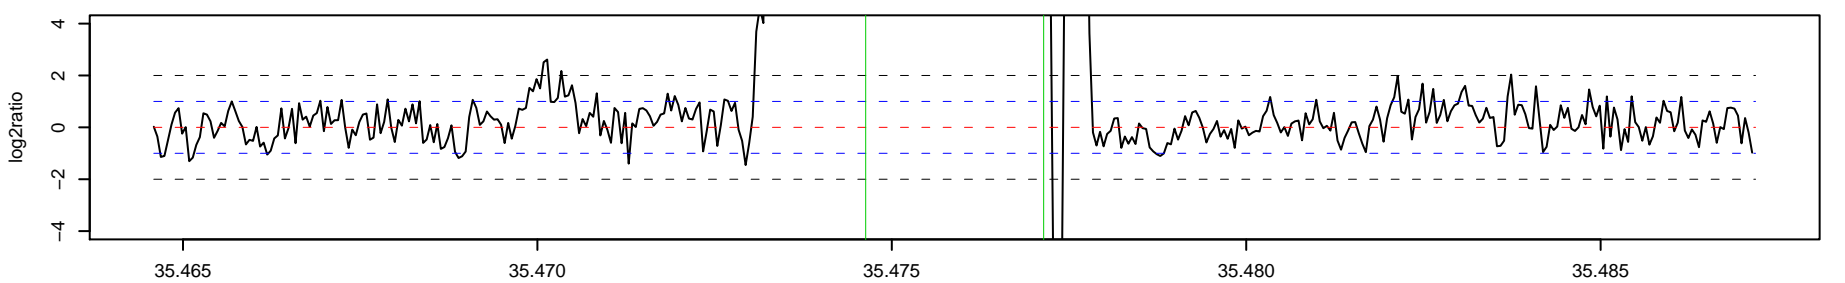

675\_AK1 Chr 22 : 48102596 – 48103410 , 815 bp (aCGH relative log2ratio= -0.74 )

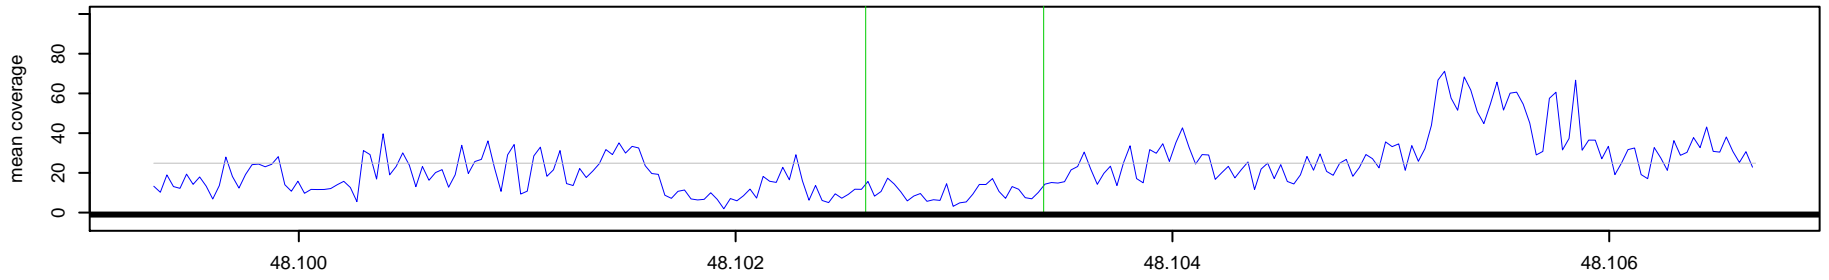

675\_NA10851 Chr 22 : 48102596 – 48103410 , 815 bp (aCGH relative log2ratio= -0.74 )

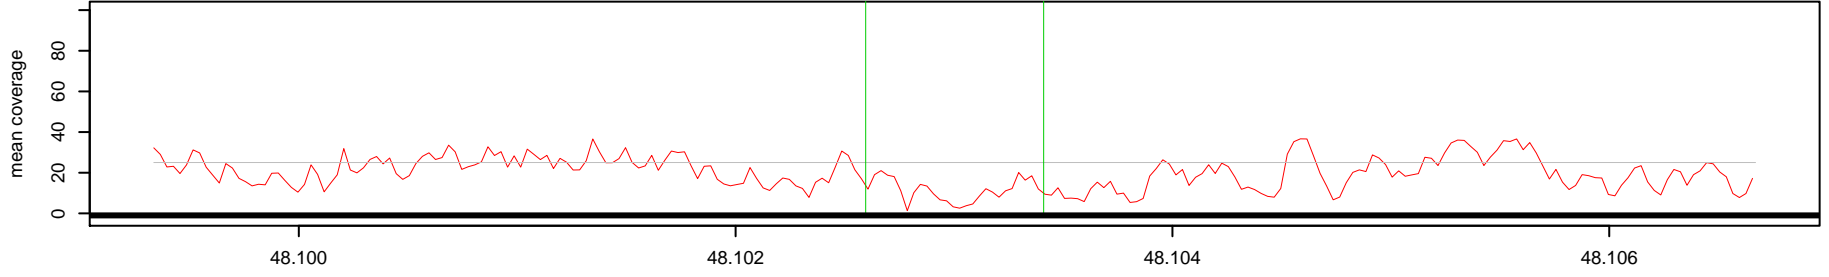

Log2( AK1 read depth / NA10851 read depth)

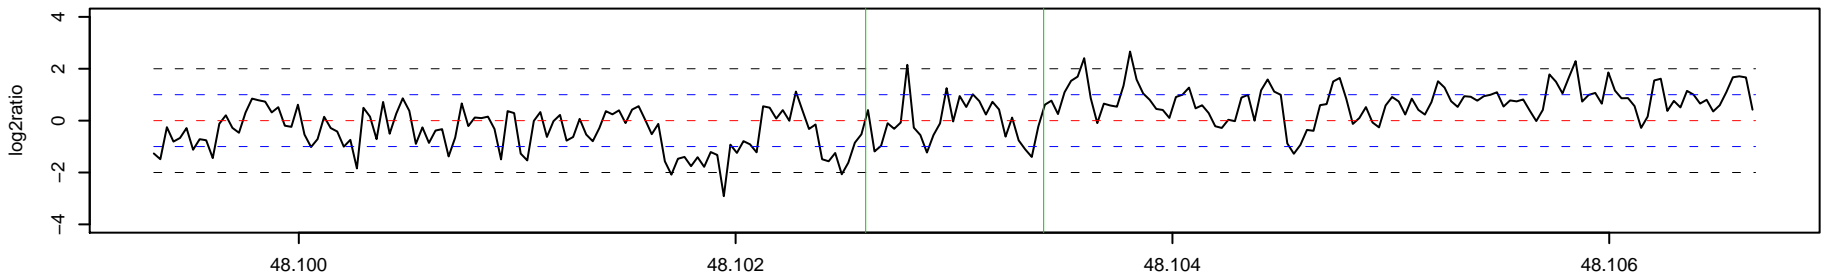

676\_AK1 Chr 4 : 135716694 – 135717399 , 706 bp (aCGH relative log2ratio= 0.57 )

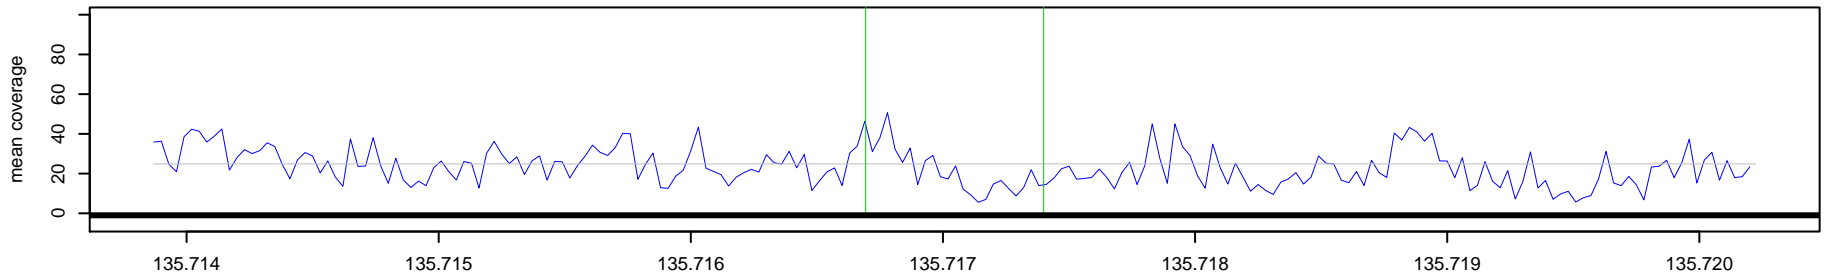

676\_NA10851 Chr 4 : 135716694 – 135717399 , 706 bp (aCGH relative log2ratio= 0.57 )

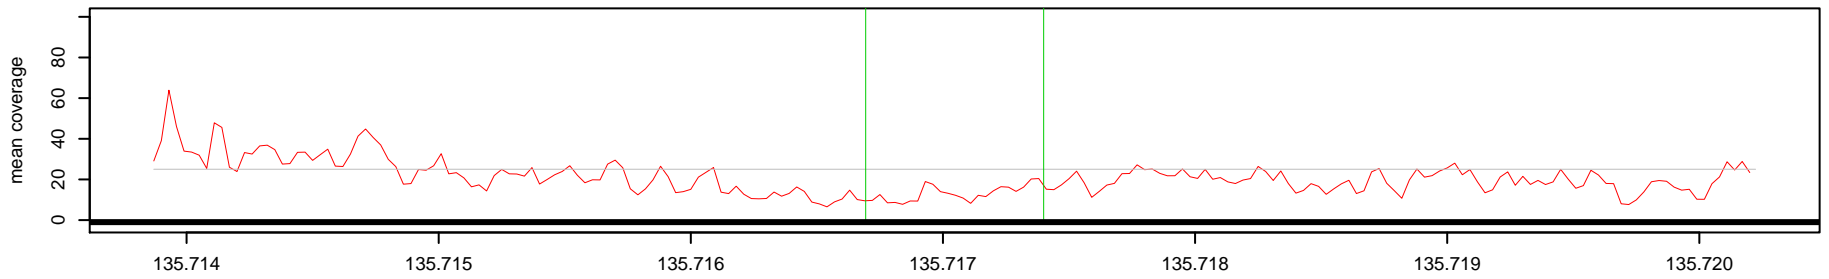

Log2( AK1 read depth / NA10851 read depth)

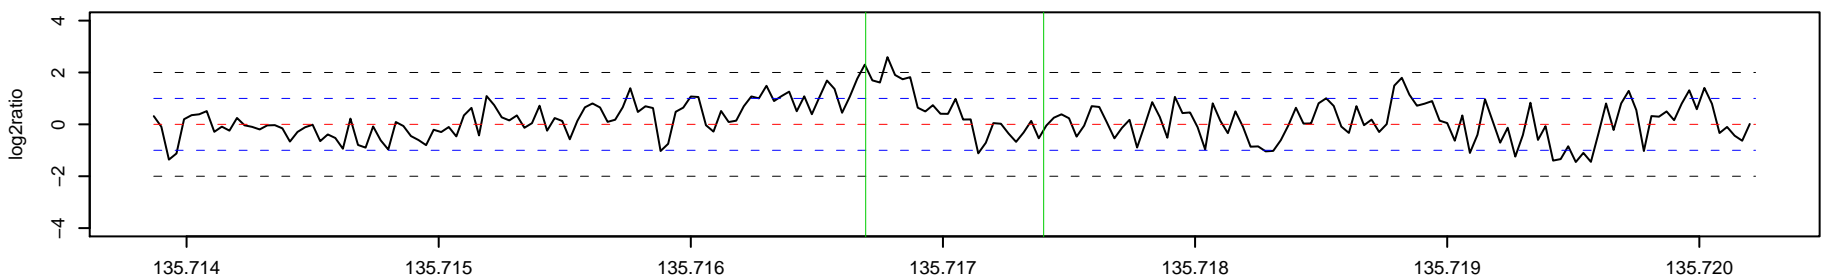

677 \_ AK1 Chr 4 : 163584719 – 163585199 , 481 bp (aCGH relative log2ratio= 0.65 )

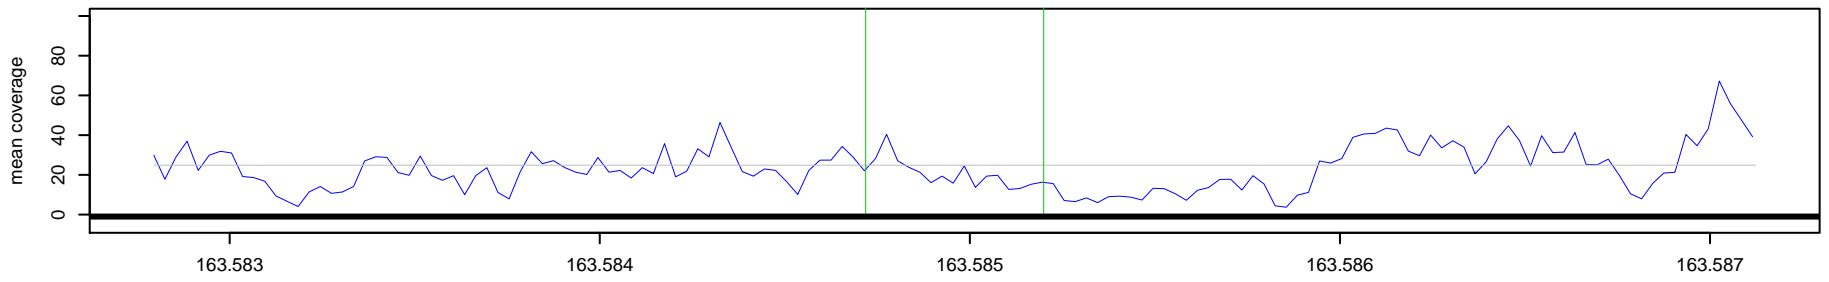

677 \_ NA10851 Chr 4 : 163584719 – 163585199 , 481 bp (aCGH relative log2ratio= 0.65 )

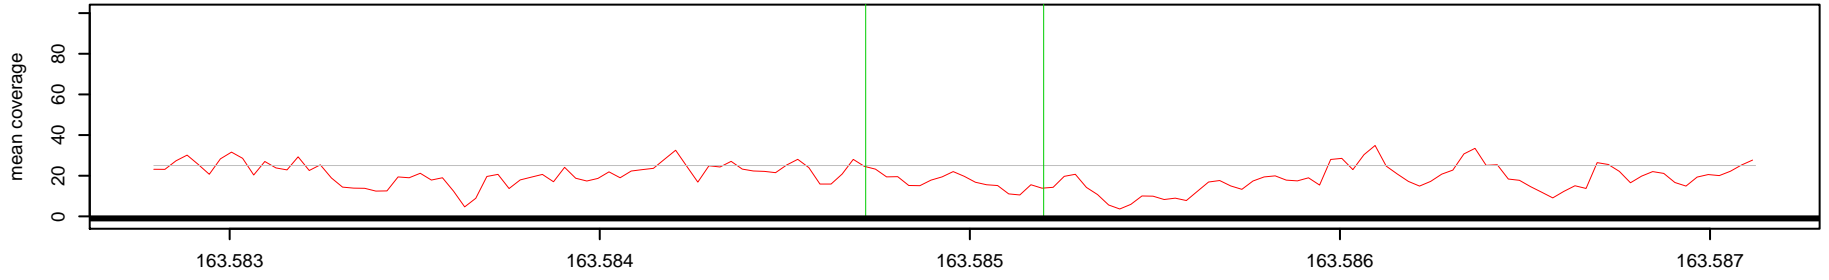

Log2( AK1 read depth / NA10851 read depth)

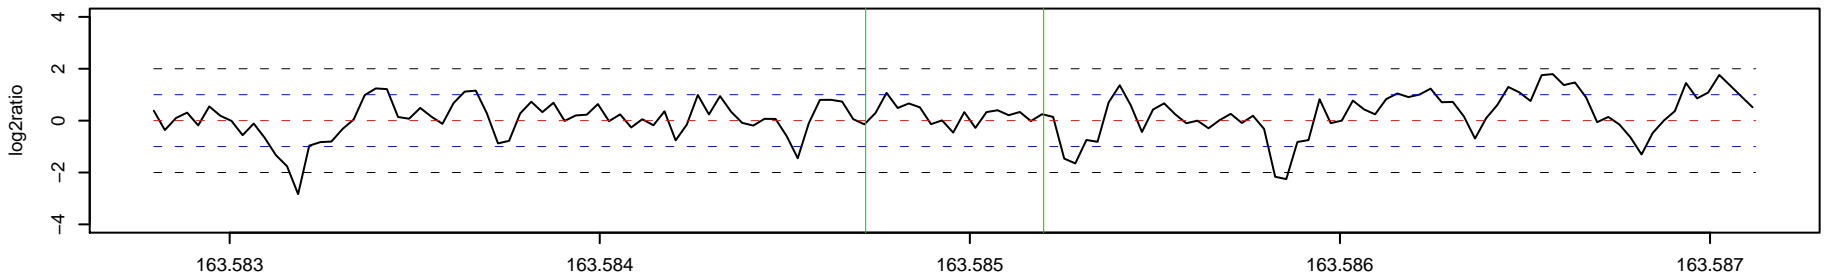

678 \_ AK1 Chr 4 : 166563761 – 166566192 , 2432 bp (aCGH relative log2ratio= -0.59 )

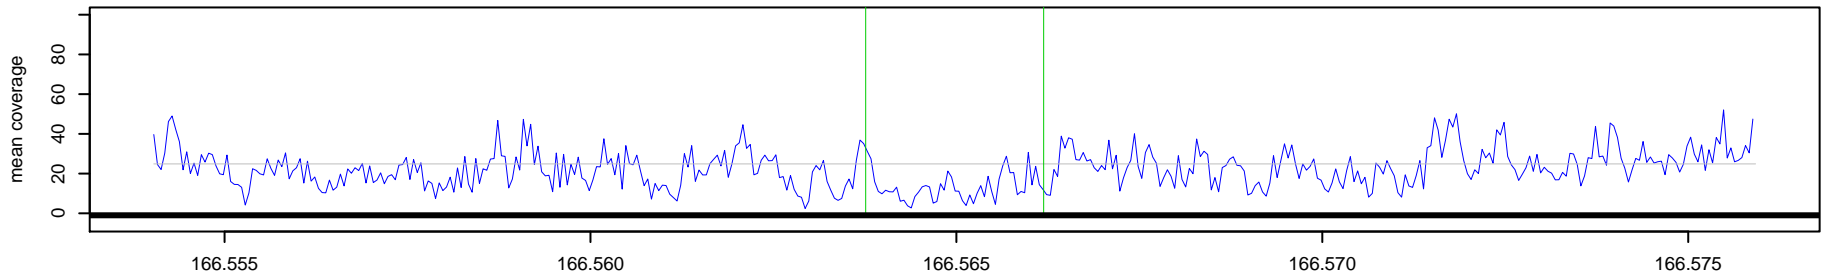

678 \_ NA10851 Chr 4 : 166563761 – 166566192 , 2432 bp (aCGH relative log2ratio= -0.59 )

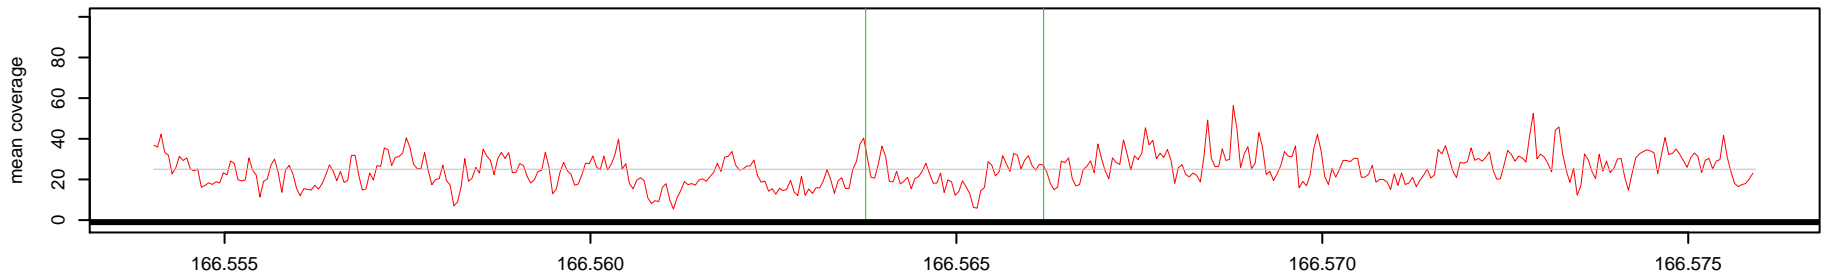

Log2( AK1 read depth / NA10851 read depth)

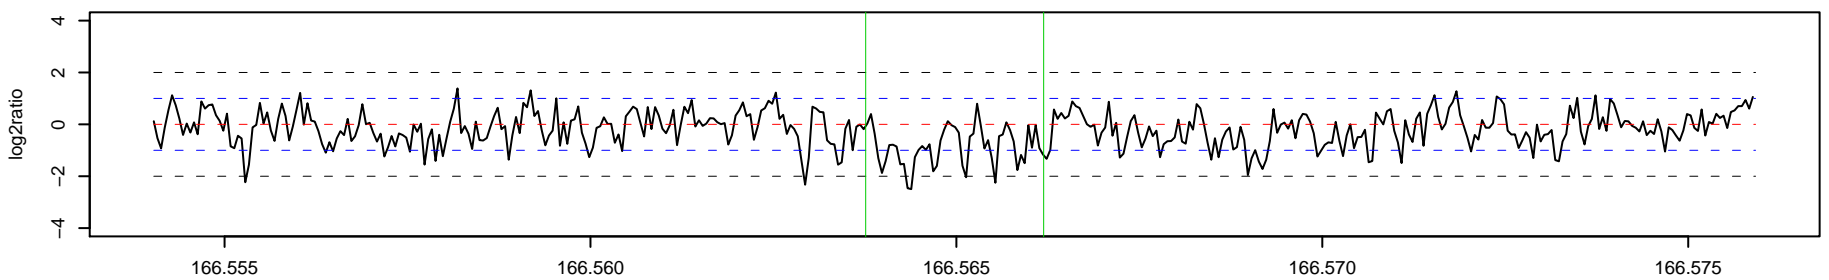

679\_AK1 Chr 4 : 175476144 – 175477587 , 1444 bp (aCGH relative log2ratio= 0.35 )

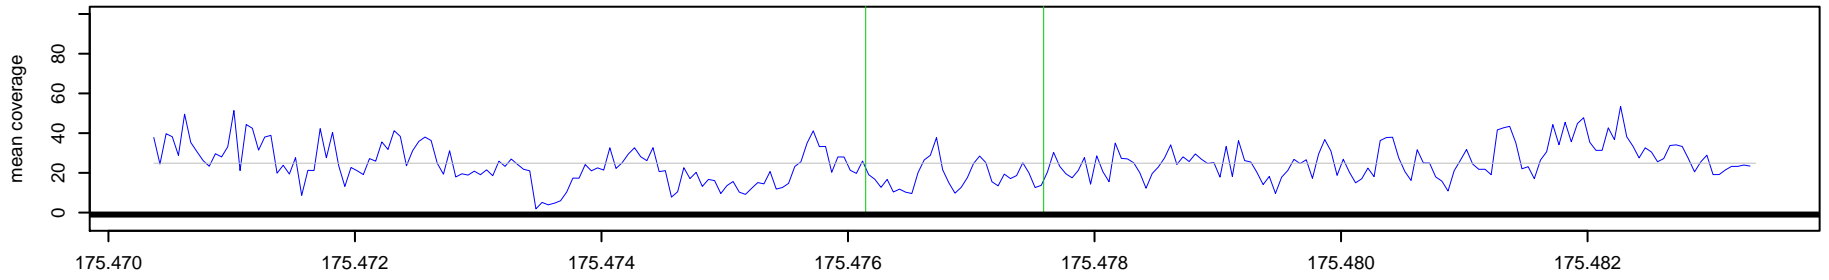

679\_NA10851 Chr 4 : 175476144 – 175477587 , 1444 bp (aCGH relative log2ratio= 0.35 )

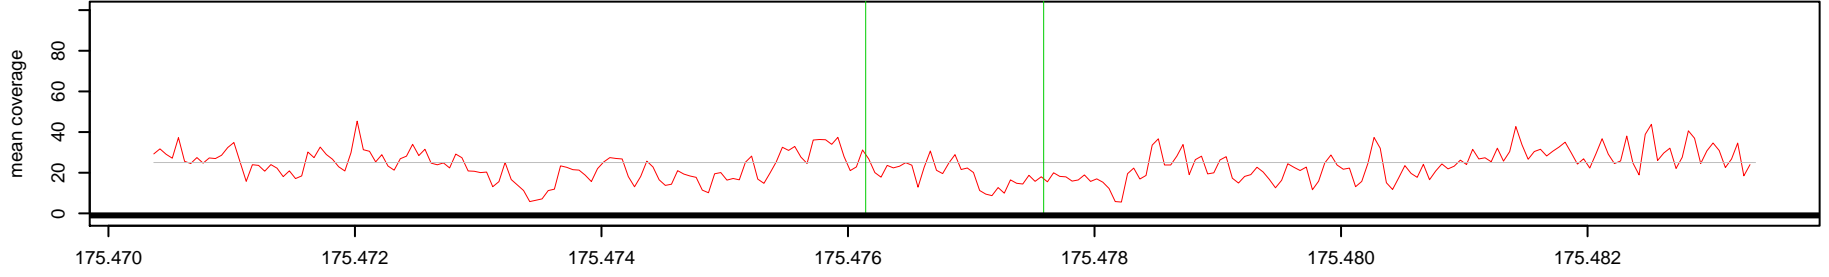

Log2( AK1 read depth / NA10851 read depth)

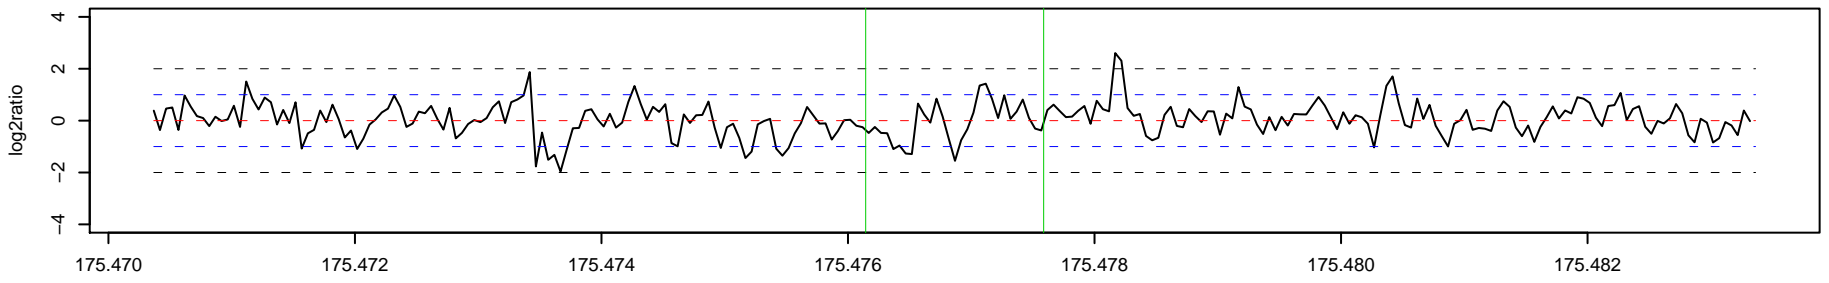

680\_AK1 Chr 4 : 180161314 – 180161990 , 677 bp (aCGH relative log2ratio= 0.53 )

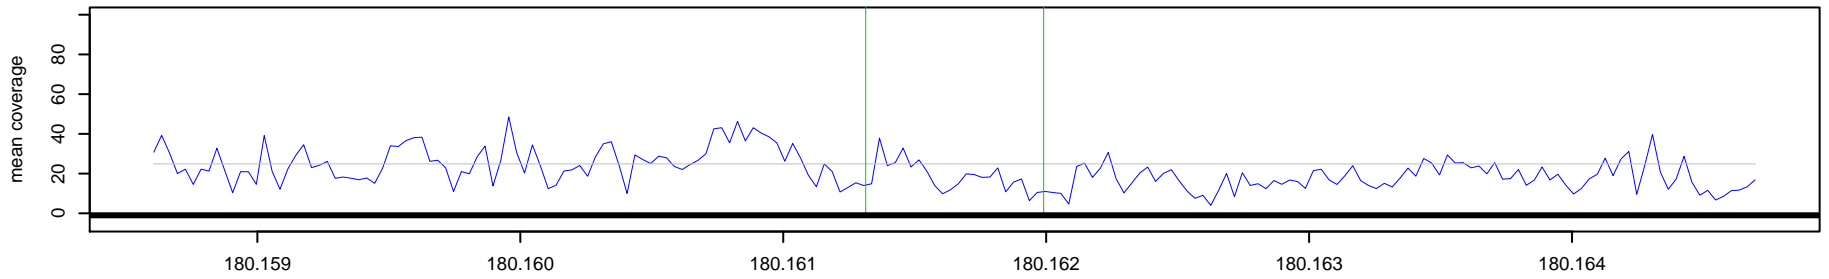

680\_NA10851 Chr 4 : 180161314 – 180161990 , 677 bp (aCGH relative log2ratio= 0.53 )

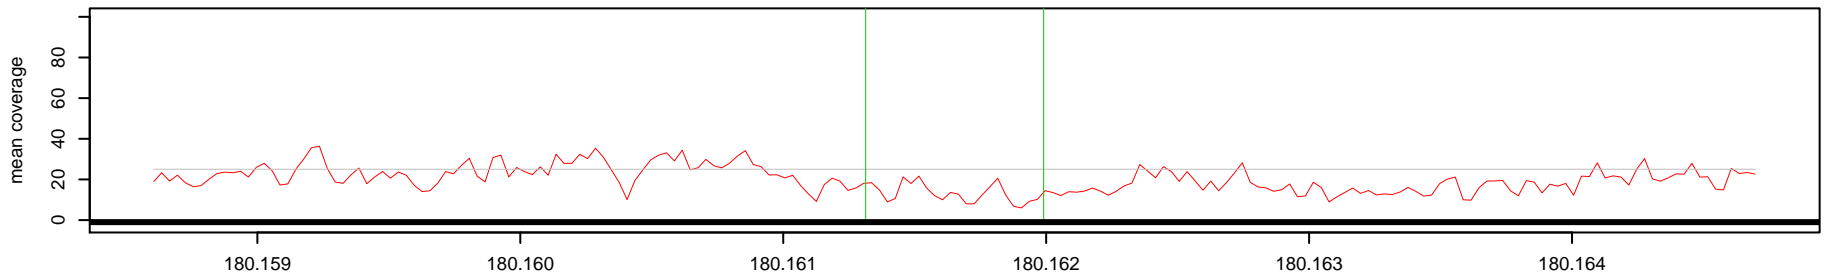

Log2( AK1 read depth / NA10851 read depth)

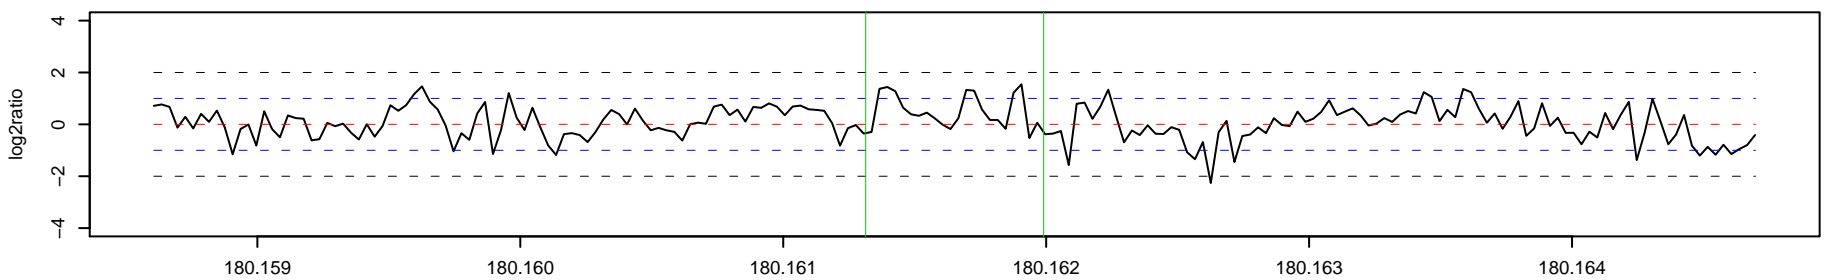



681 \_ AK1 Chr 4 : 181759584 – 181760498 , 915 bp (aCGH relative log2ratio= 0.53 )

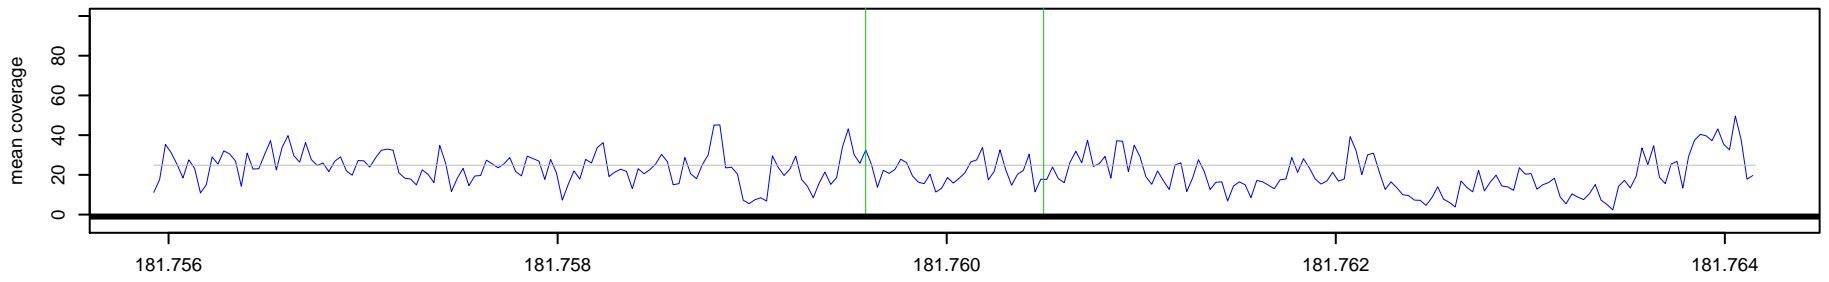

681 \_ NA10851 Chr 4 : 181759584 – 181760498 , 915 bp (aCGH relative log2ratio= 0.53 )

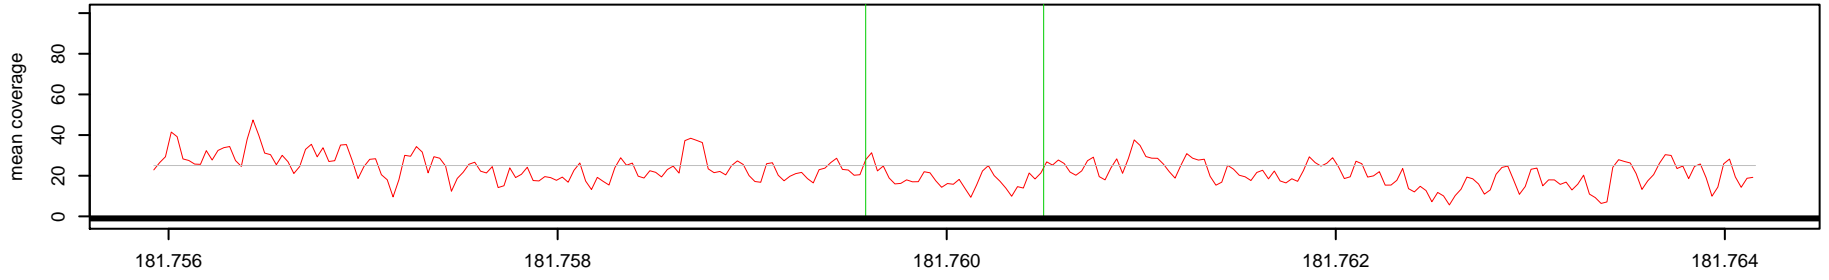

Log2( AK1 read depth / NA10851 read depth)

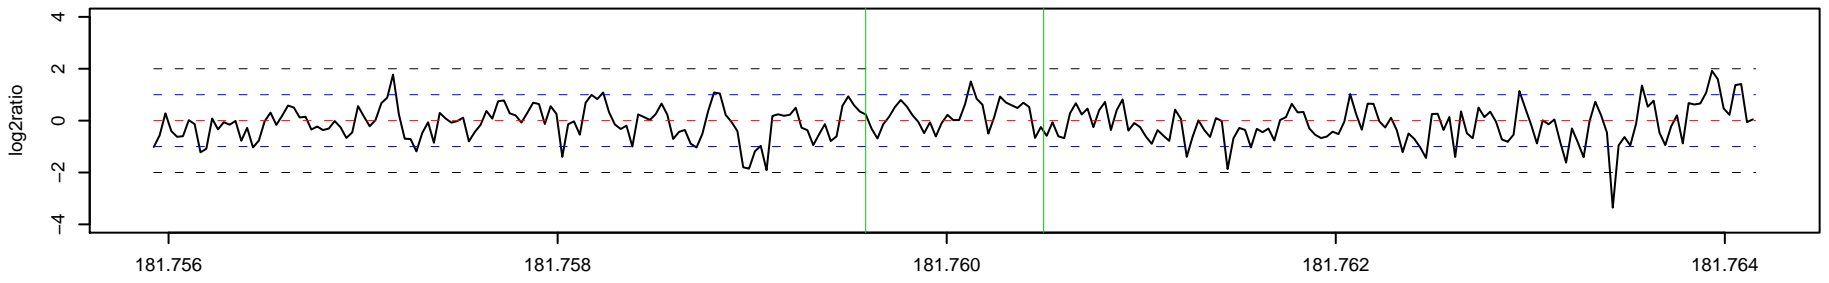

682 \_ AK1 Chr 4 : 182298102 – 182298638 , 537 bp (aCGH relative log2ratio= 0.63 )

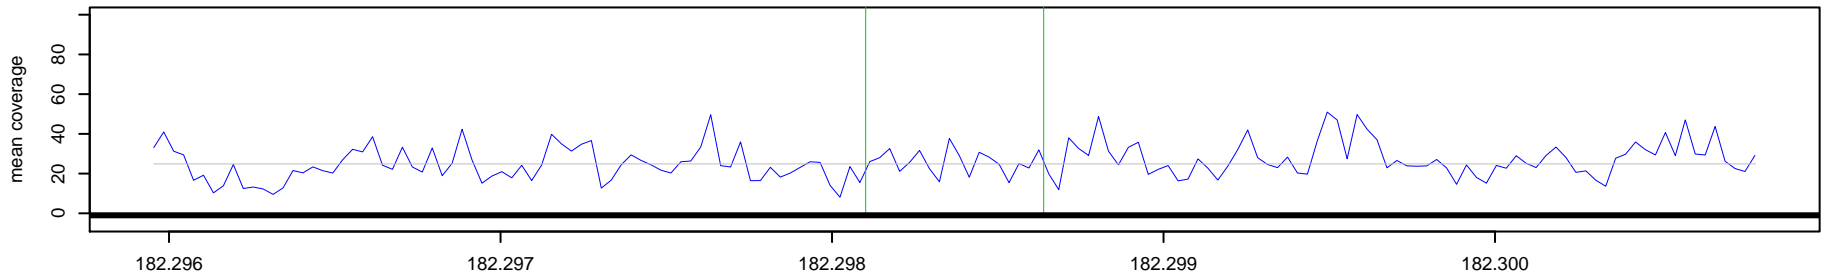

682 \_ NA10851 Chr 4 : 182298102 – 182298638 , 537 bp (aCGH relative log2ratio= 0.63 )

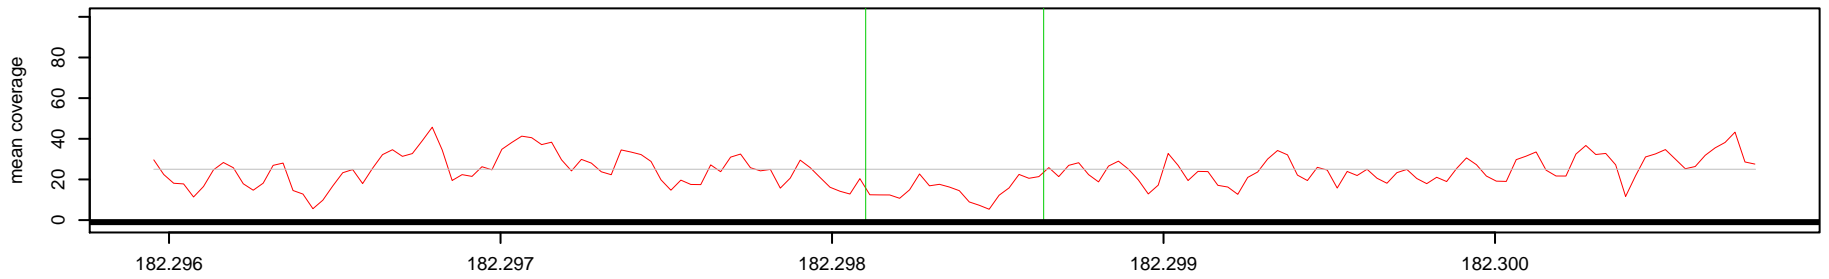

Log2( AK1 read depth / NA10851 read depth)

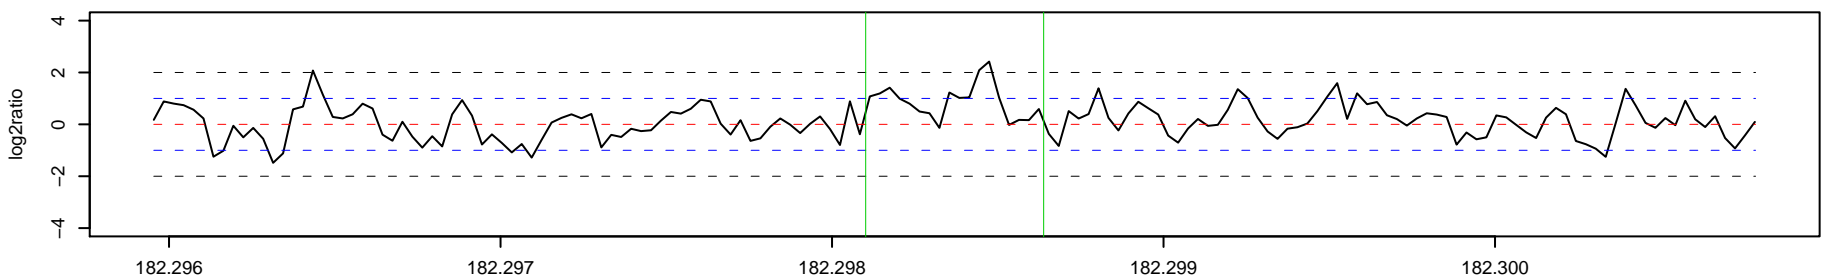

683 \_ AK1 Chr 4 : 191042969 – 191133296 , 90328 bp (aCGH relative log2ratio= 0.34 )

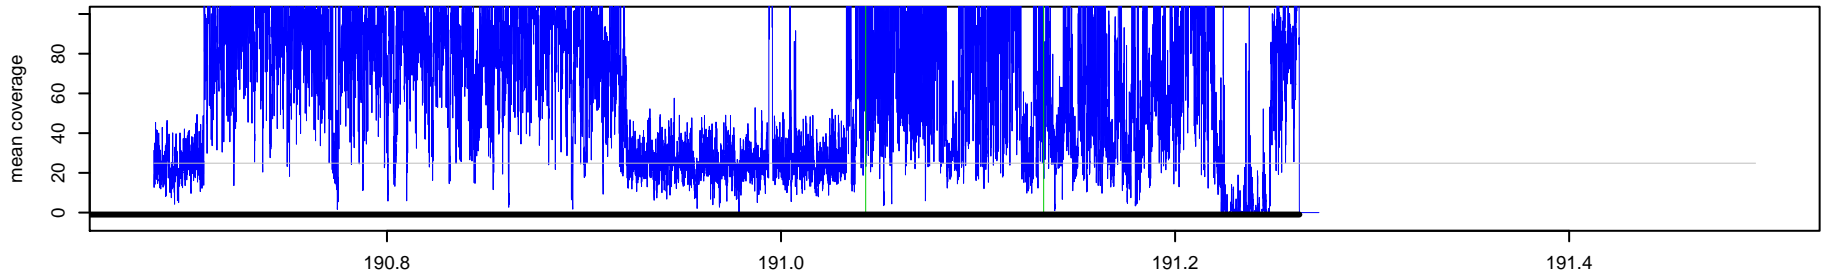

683 \_ NA10851 Chr 4 : 191042969 – 191133296 , 90328 bp (aCGH relative log2ratio= 0.34 )

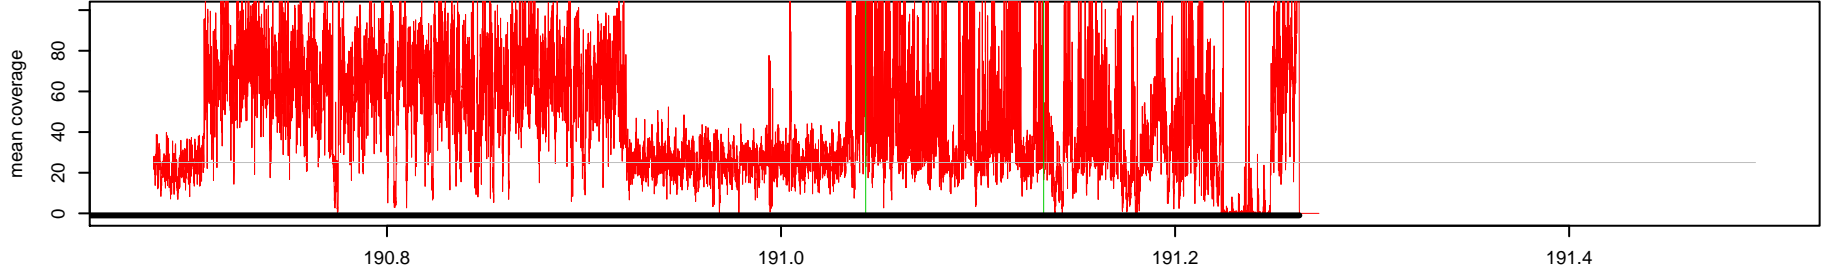

Log2( AK1 read depth / NA10851 read depth)

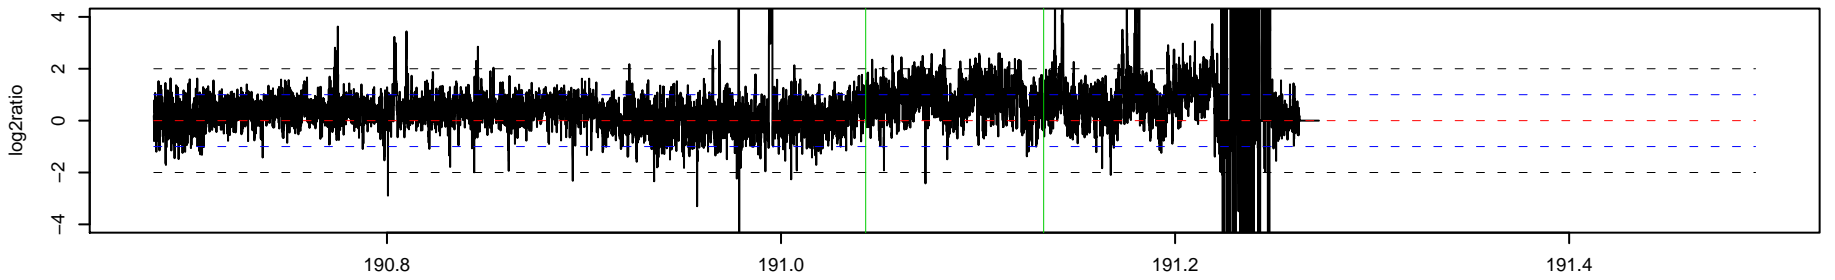

684 \_ AK1 Chr 5 : 701184 – 704696 , 3513 bp (aCGH relative log2ratio= -0.90 )

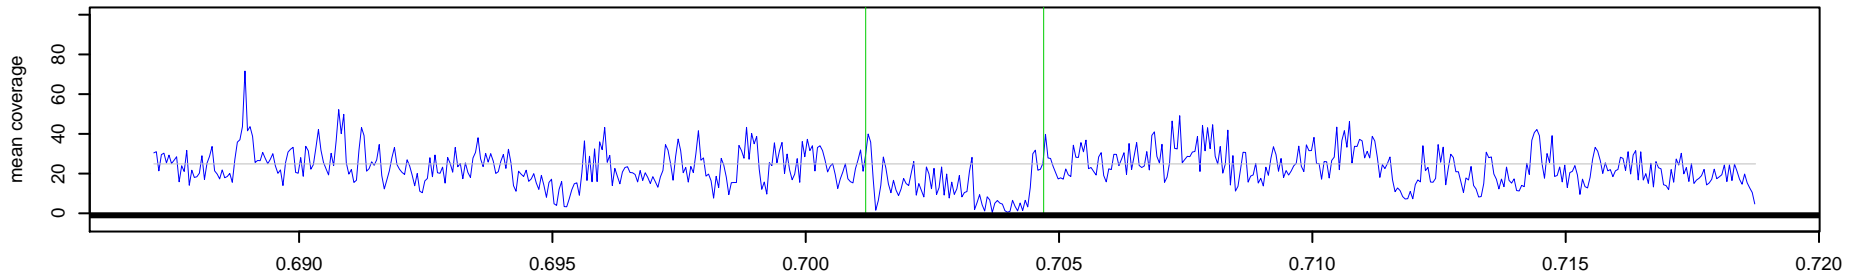

684 \_ NA10851 Chr 5 : 701184 – 704696 , 3513 bp (aCGH relative log2ratio= -0.90 )

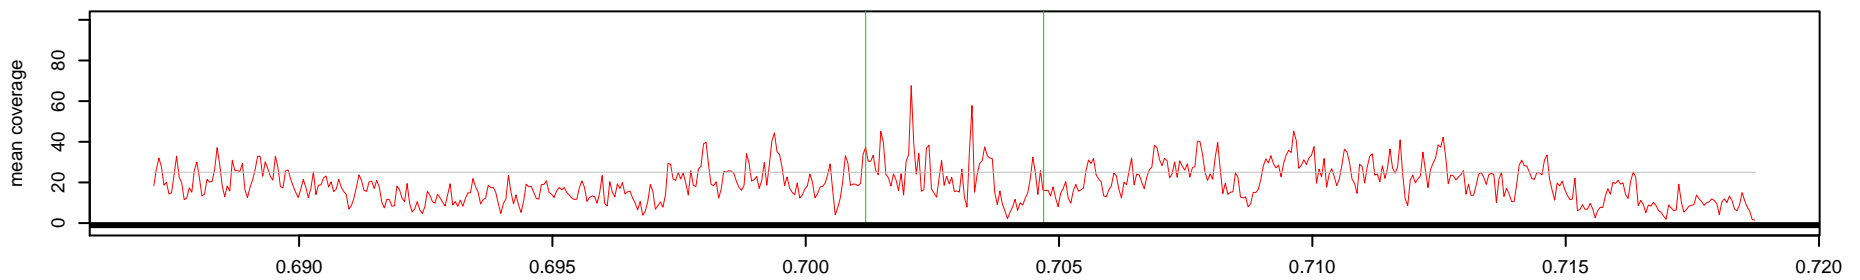

Log2( AK1 read depth / NA10851 read depth)

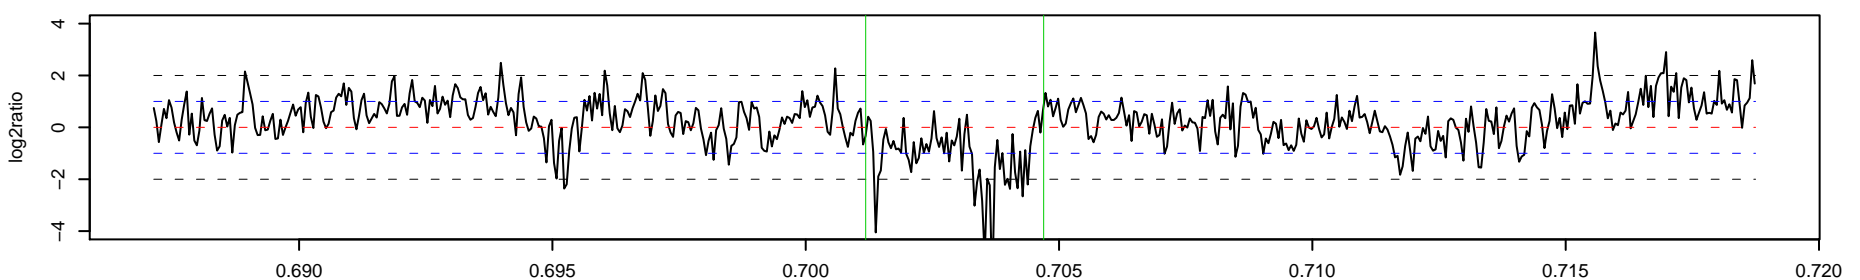

685\_AK1 Chr 5 : 17298261 – 17298781 , 521 bp (aCGH relative log2ratio= 0.52 )

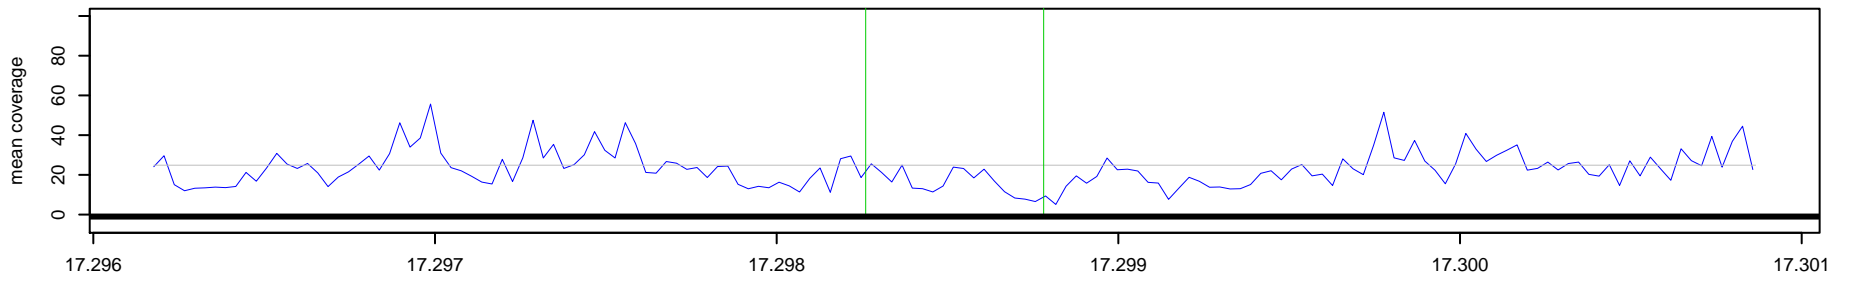

685\_NA10851 Chr 5 : 17298261 – 17298781 , 521 bp (aCGH relative log2ratio= 0.52 )

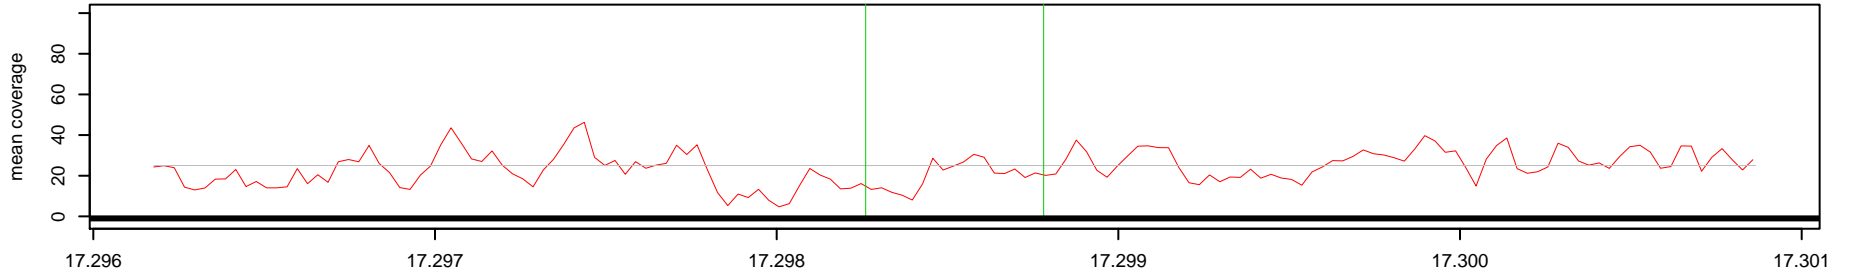

Log2( AK1 read depth / NA10851 read depth)

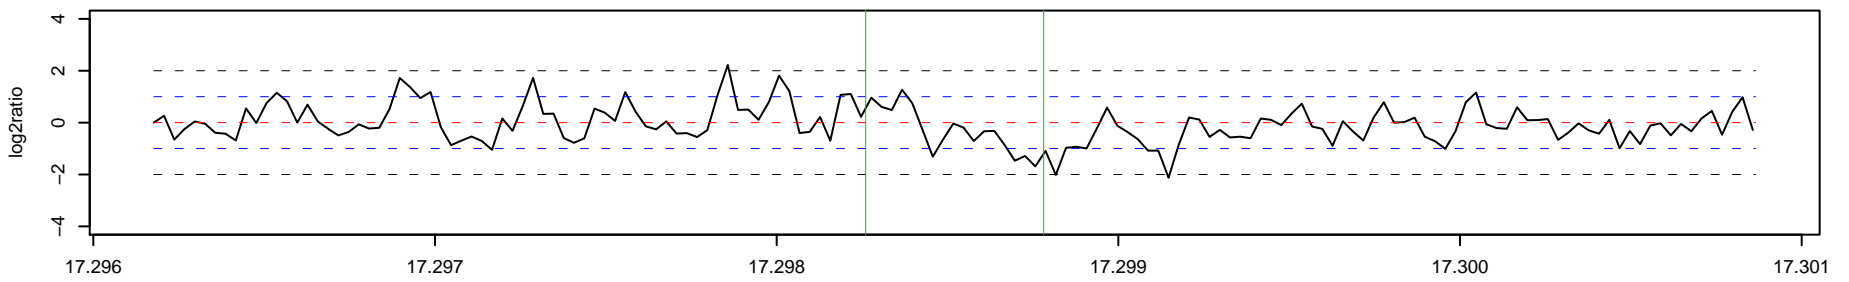

686\_AK1 Chr 5 : 20868327 – 20869677 , 1351 bp (aCGH relative log2ratio= -0.39 )

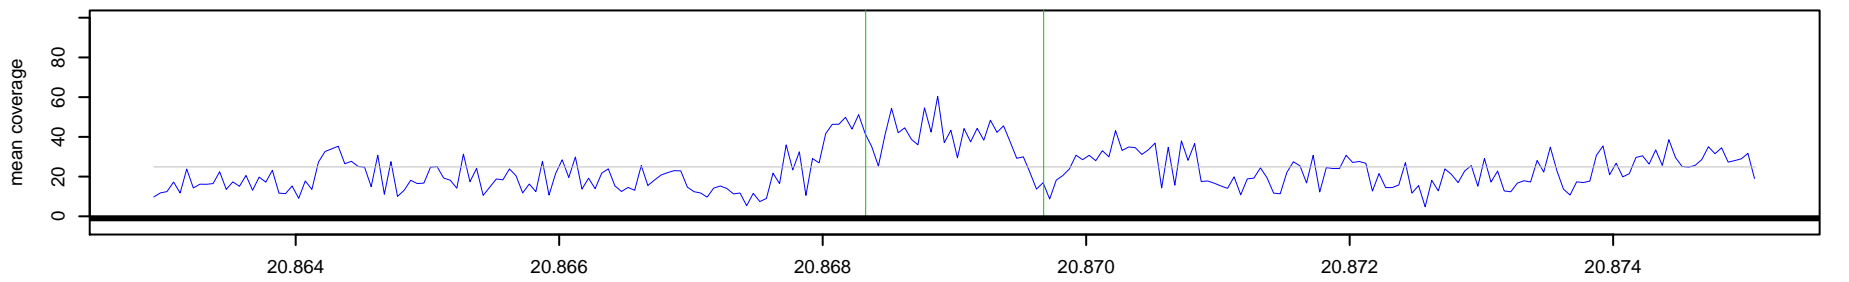

686\_NA10851 Chr 5 : 20868327 – 20869677 , 1351 bp (aCGH relative log2ratio= -0.39 )

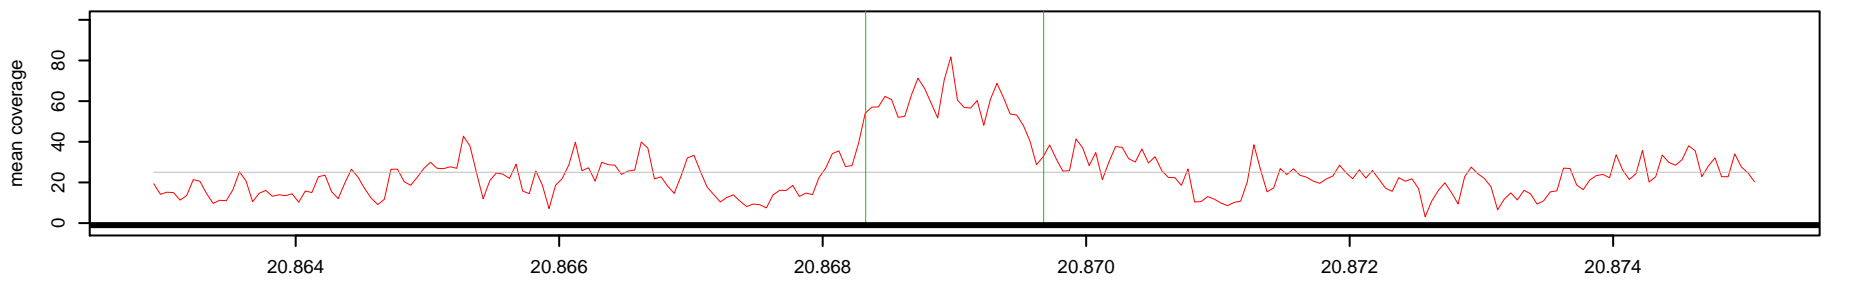

Log2( AK1 read depth / NA10851 read depth)

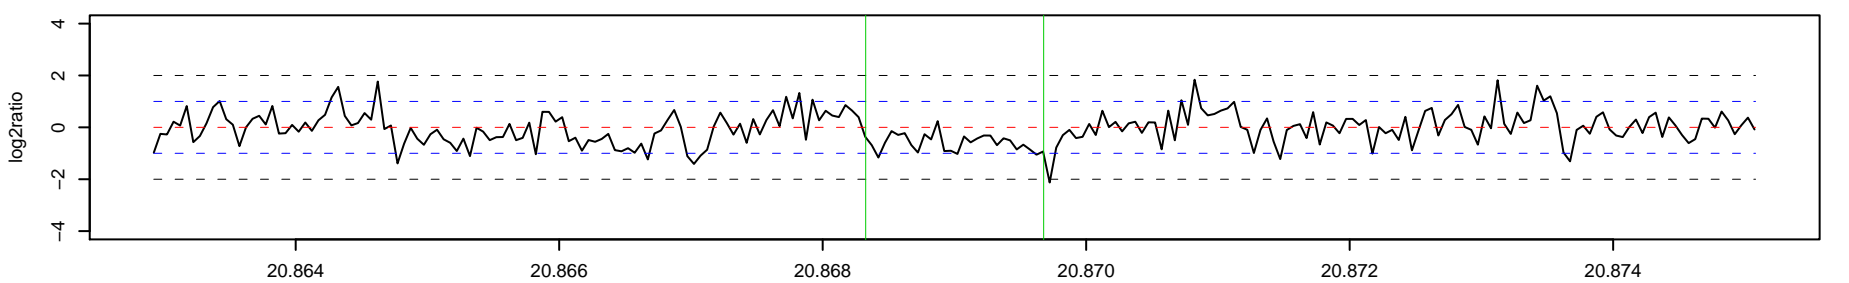

687\_AK1 Chr 5 : 21161955 – 21163479 , 1525 bp (aCGH relative log2ratio= 0.51 )

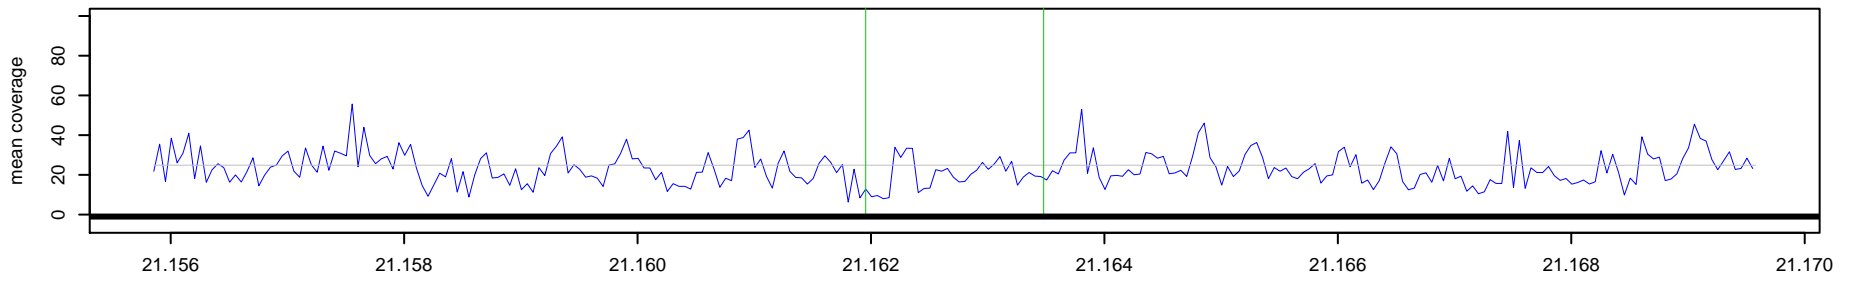

687\_NA10851 Chr 5 : 21161955 – 21163479 , 1525 bp (aCGH relative log2ratio= 0.51 )

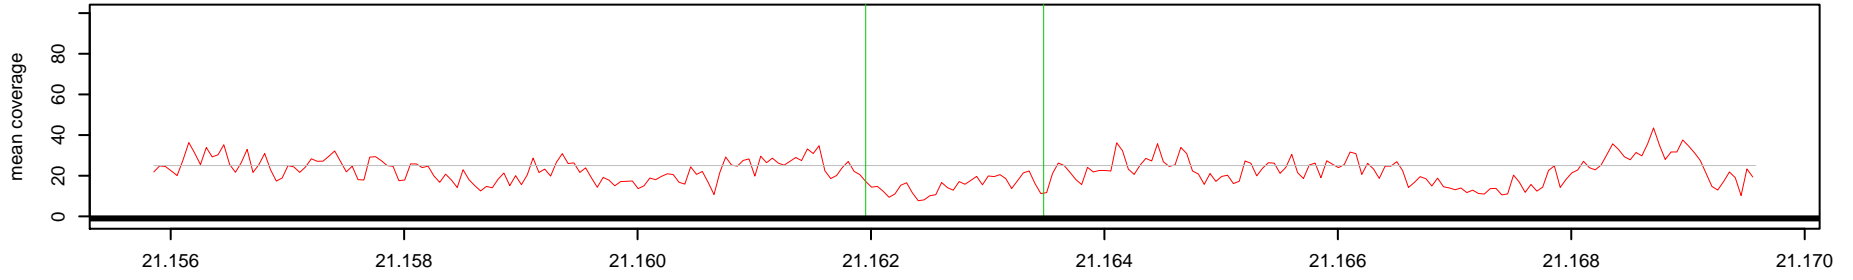

Log2( AK1 read depth / NA10851 read depth)

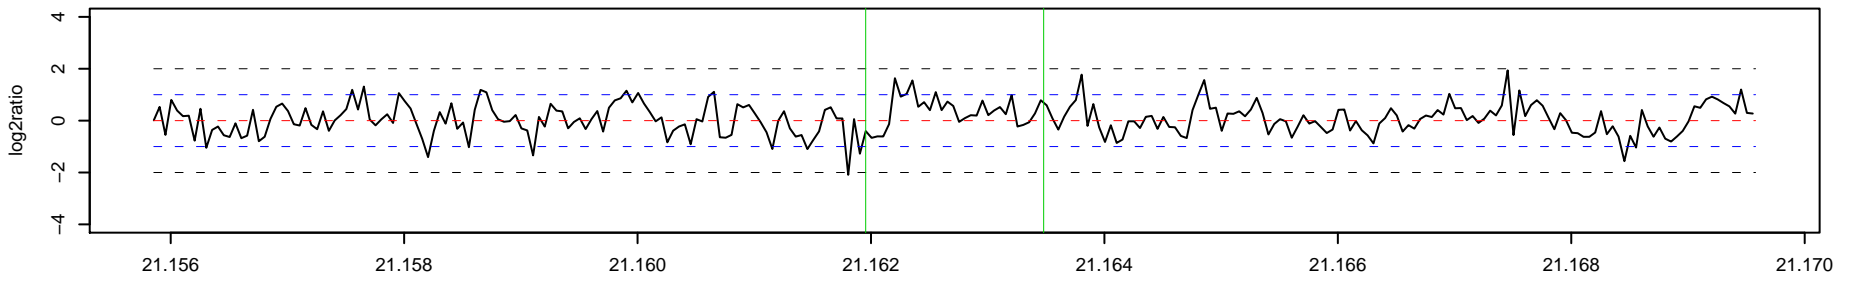

688\_AK1 Chr 5 : 22114839 – 22115851 , 1013 bp (aCGH relative log2ratio= 0.52 )

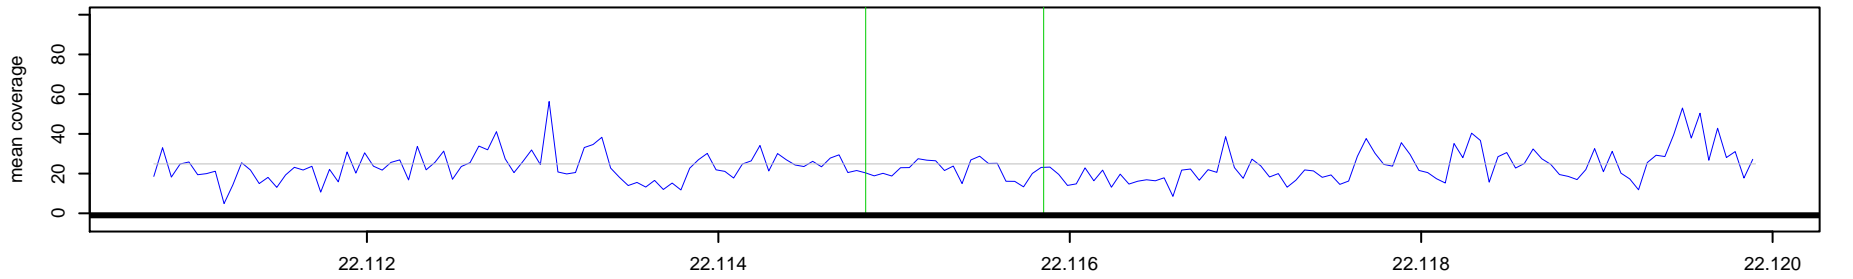

688\_NA10851 Chr 5 : 22114839 – 22115851 , 1013 bp (aCGH relative log2ratio= 0.52 )

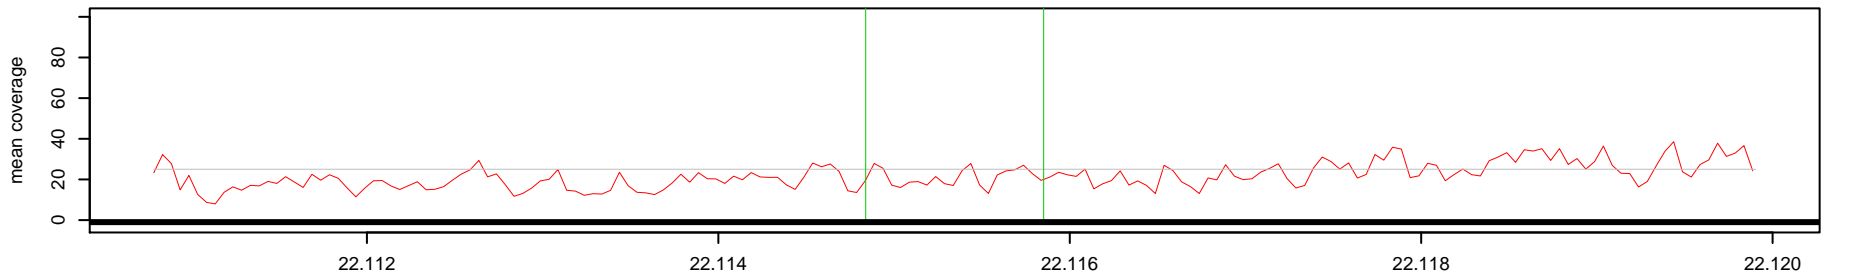

Log2( AK1 read depth / NA10851 read depth)

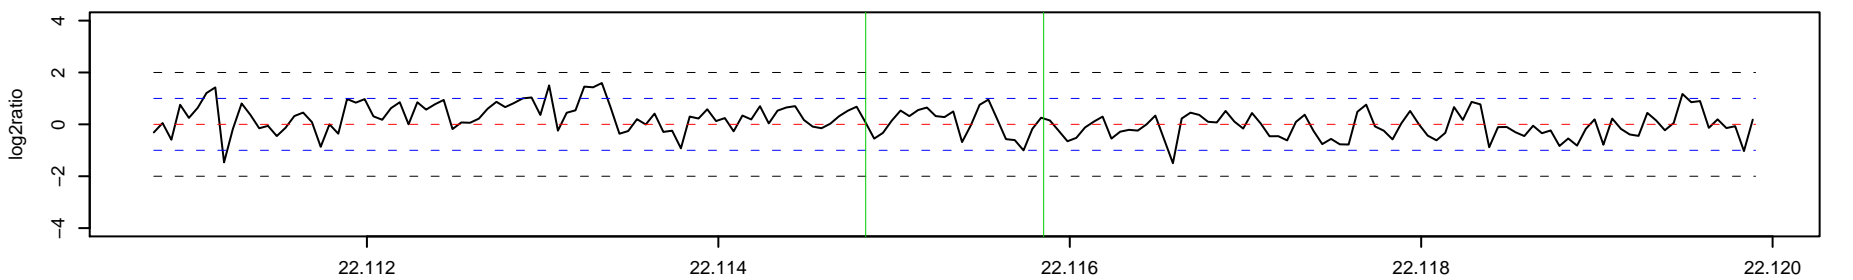

689\_AK1 Chr 5 : 29889900 – 29891639 , 1740 bp (aCGH relative log2ratio= 0.56 )

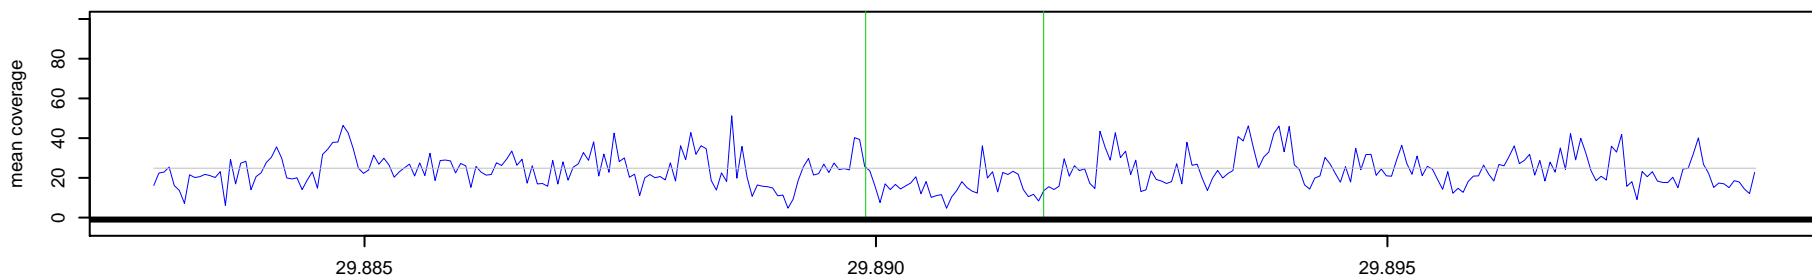

689\_NA10851 Chr 5 : 29889900 – 29891639 , 1740 bp (aCGH relative log2ratio= 0.56 )

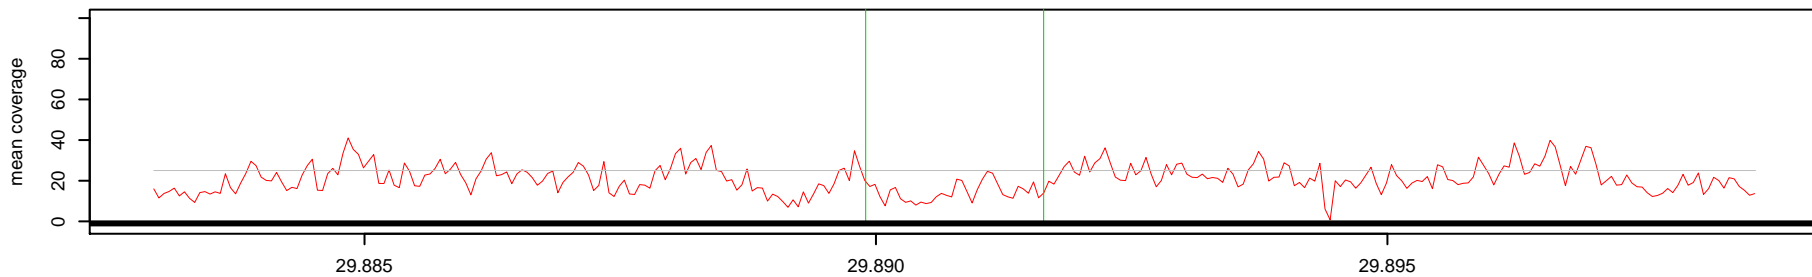

Log2( AK1 read depth / NA10851 read depth)

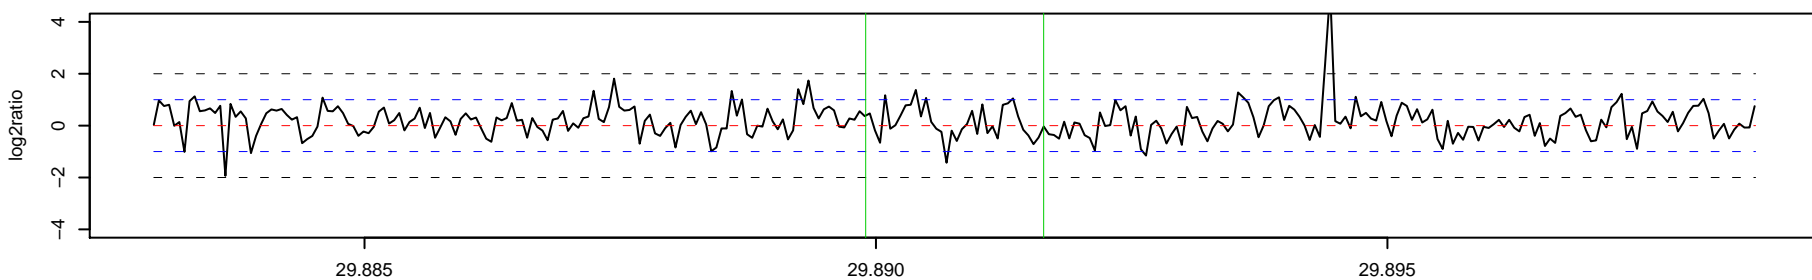

690\_AK1 Chr 5 : 51019331 – 51019787 , 457 bp (aCGH relative log2ratio= 0.54 )

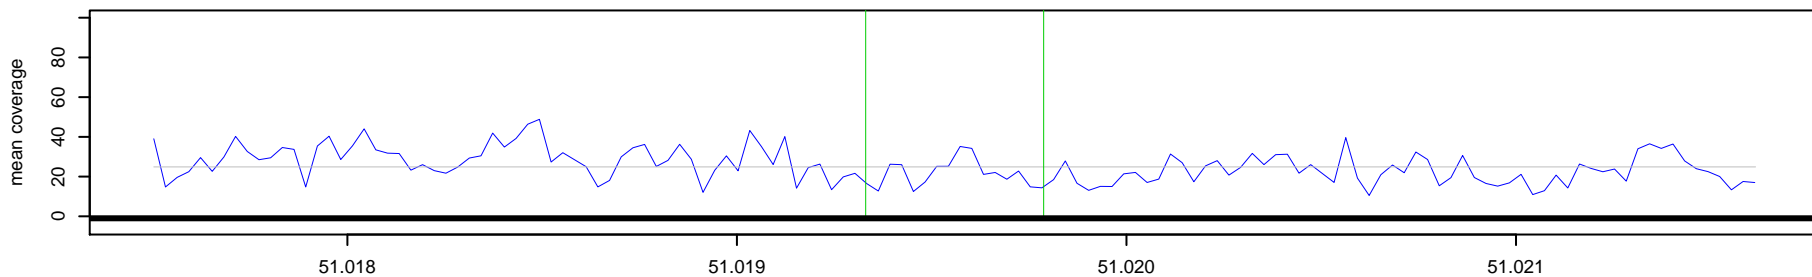

690\_NA10851 Chr 5 : 51019331 – 51019787 , 457 bp (aCGH relative log2ratio= 0.54 )

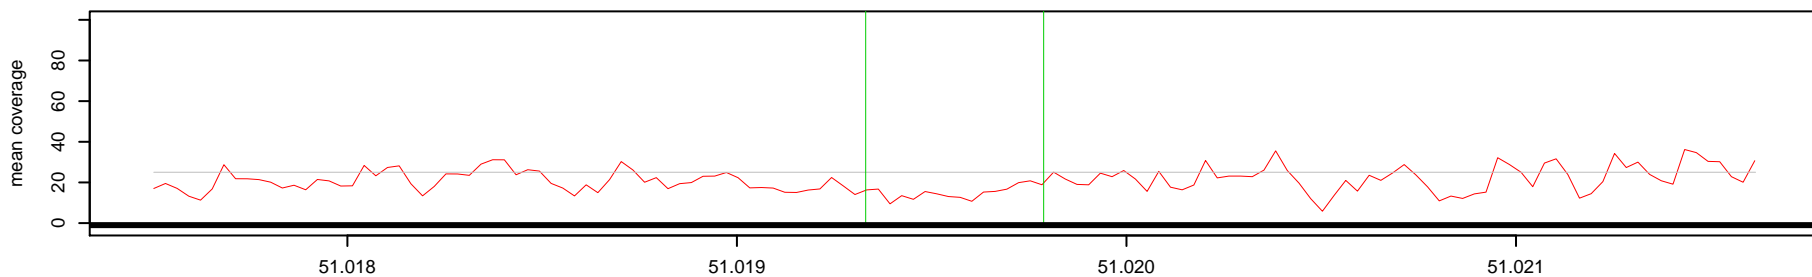

Log2( AK1 read depth / NA10851 read depth)

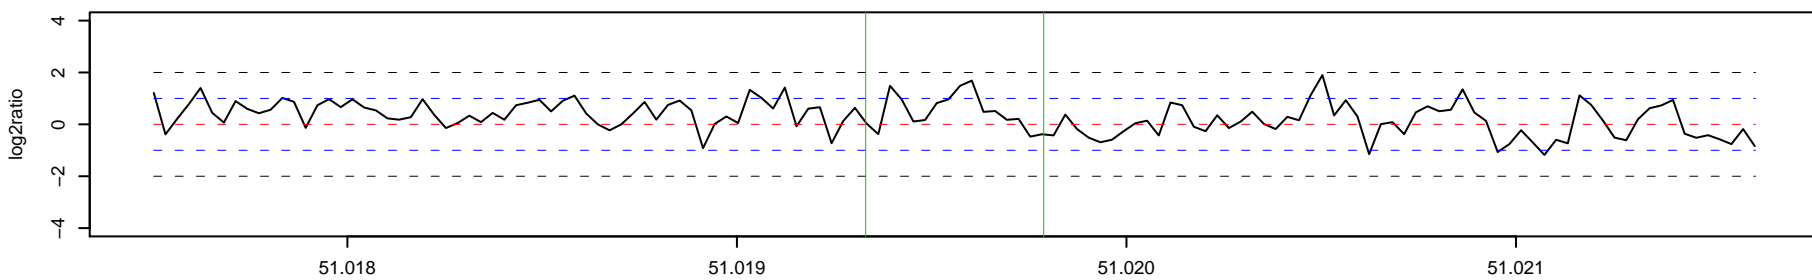

691 \_ AK1 Chr 16 : 34323845 - 34604889 , 281045 bp (aCGH relative log2ratio= -0.38 )

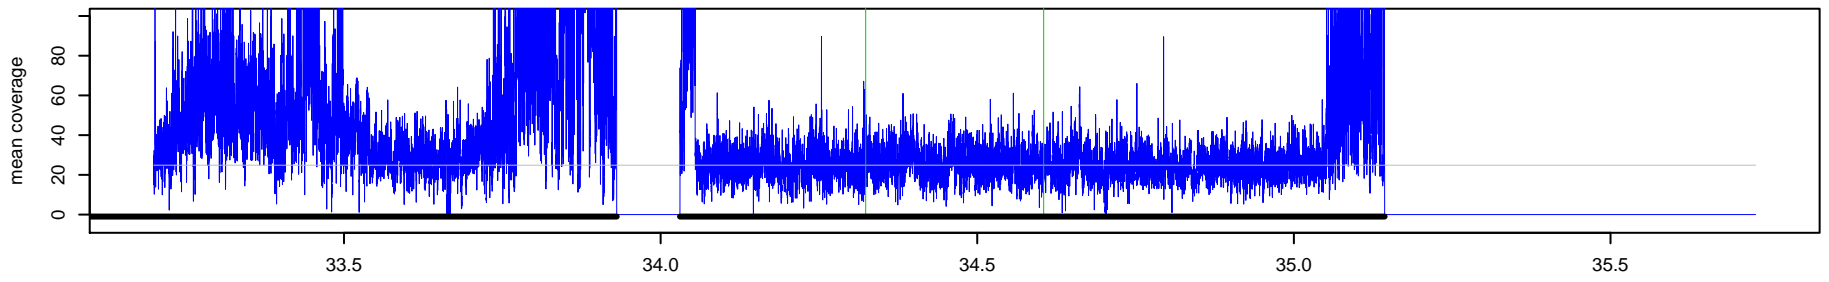

691 \_ NA10851 Chr 16 : 34323845 - 34604889 , 281045 bp (aCGH relative log2ratio= -0.38 )

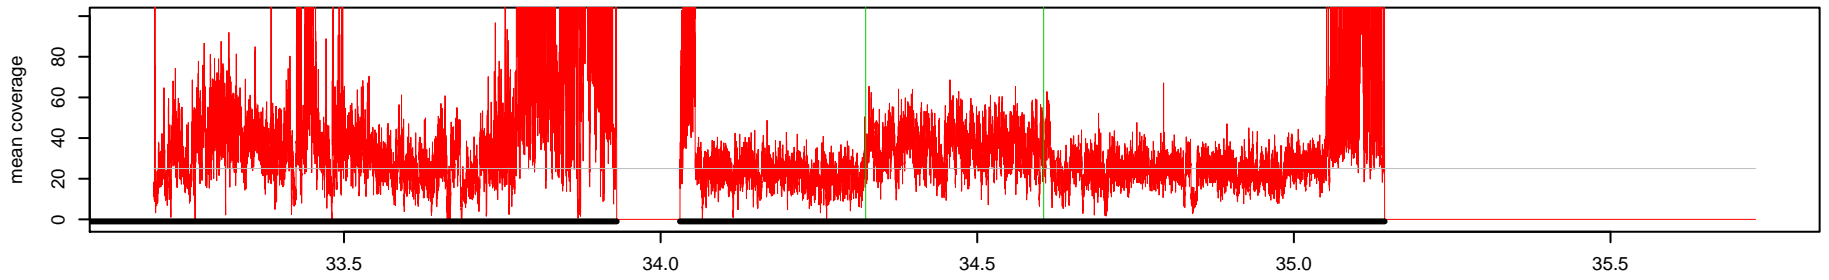

Log2( AK1 read depth / NA10851 read depth)

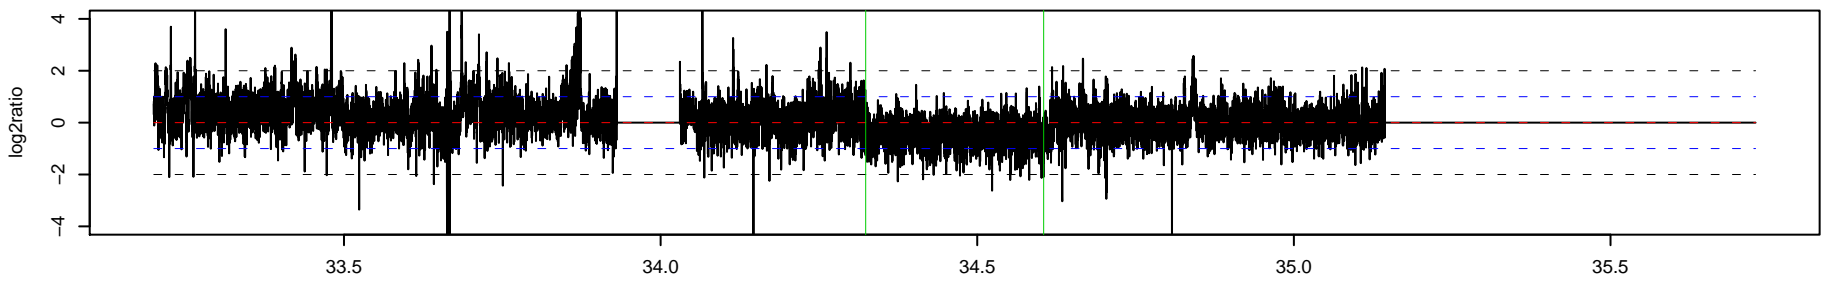

692 \_ AK1 Chr 16 : 46185118 - 46185677 , 560 bp (aCGH relative log2ratio= 0.49 )

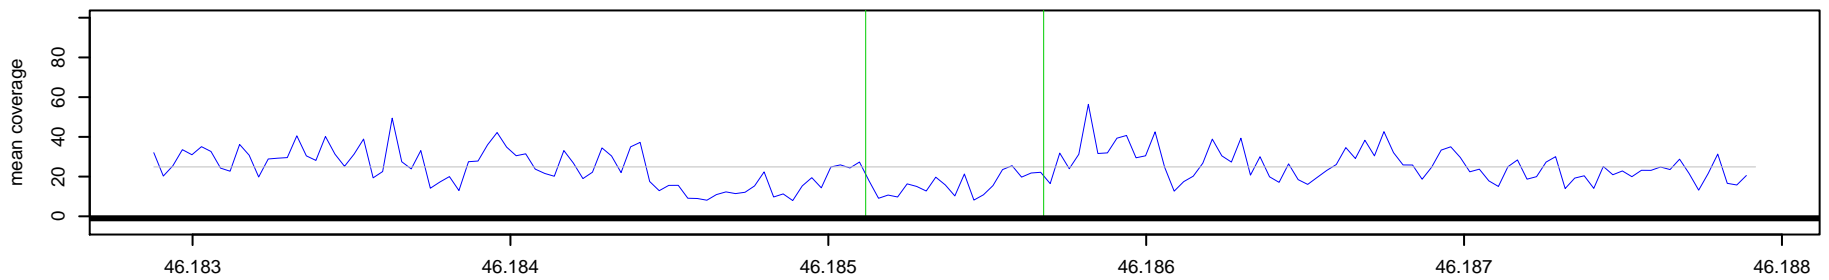

692 \_ NA10851 Chr 16 : 46185118 - 46185677 , 560 bp (aCGH relative log2ratio= 0.49 )

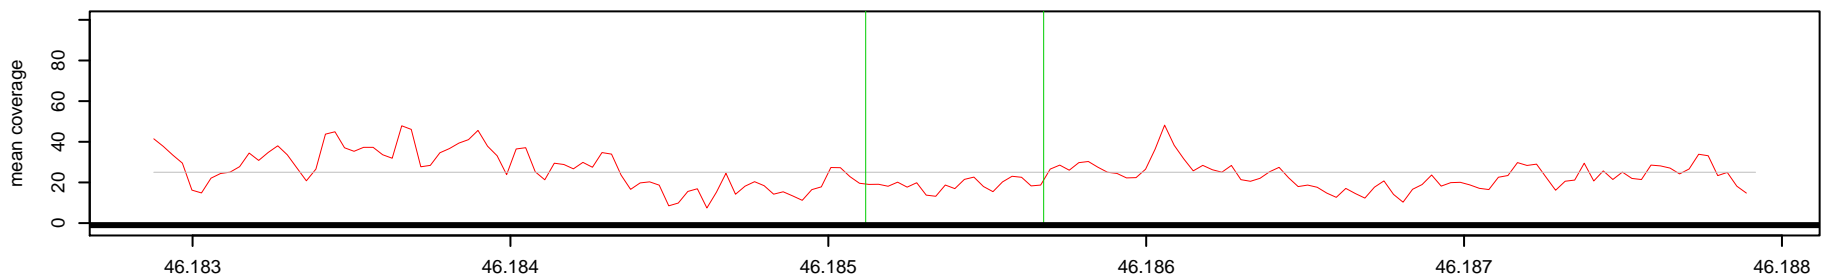

Log2( AK1 read depth / NA10851 read depth)

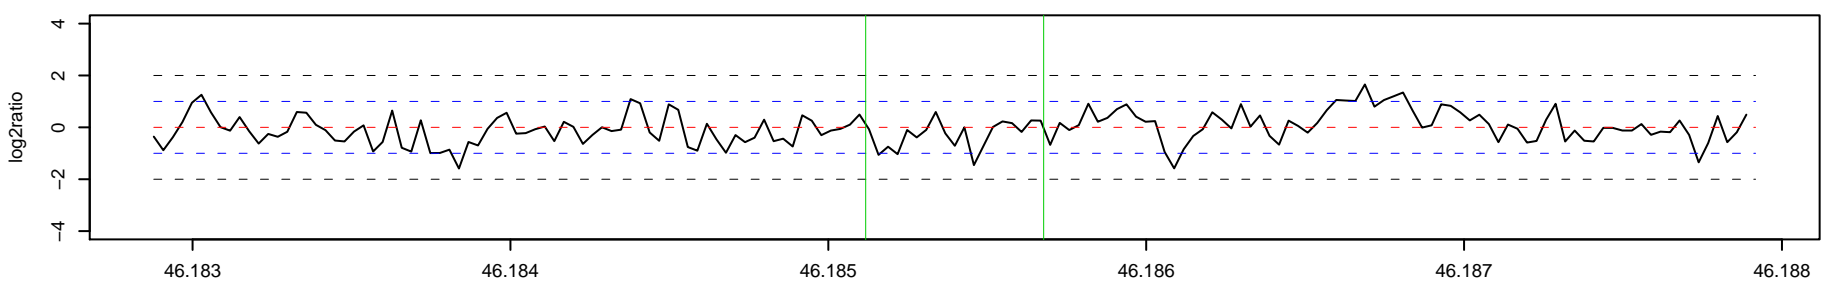

693 \_ AK1 Chr 16 : 48845017 – 48908328 , 63312 bp (aCGH relative log2ratio= -0.21 )

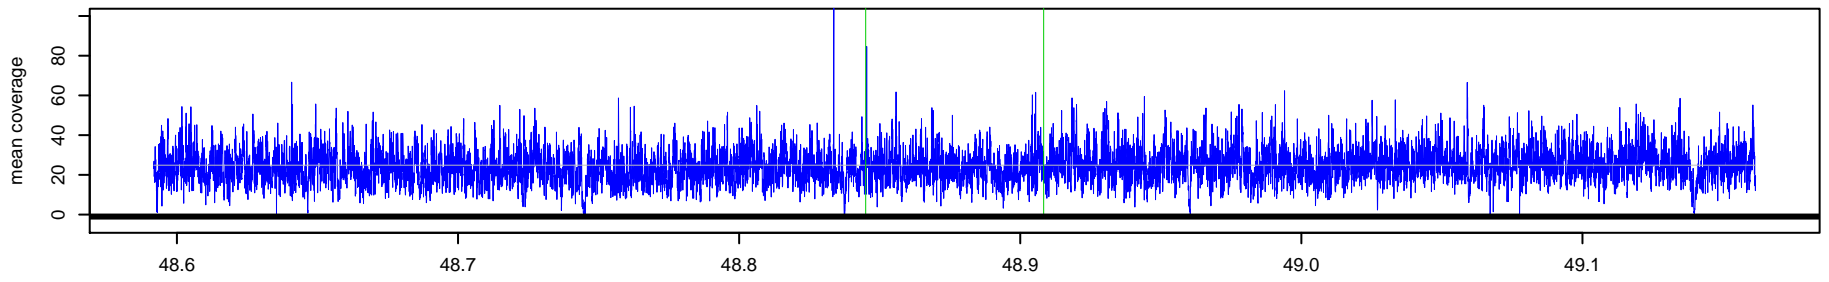

693 \_ NA10851 Chr 16 : 48845017 – 48908328 , 63312 bp (aCGH relative log2ratio= -0.21 )

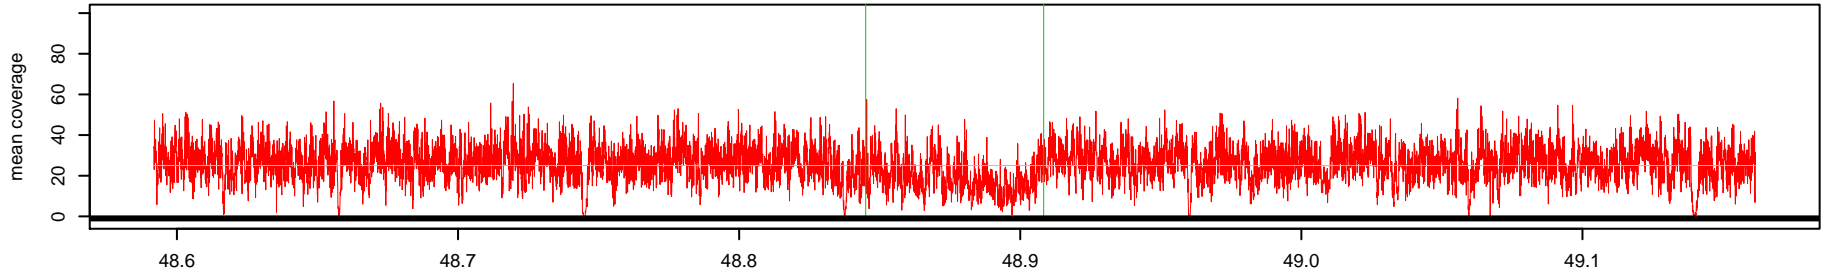

Log2( AK1 read depth / NA10851 read depth)

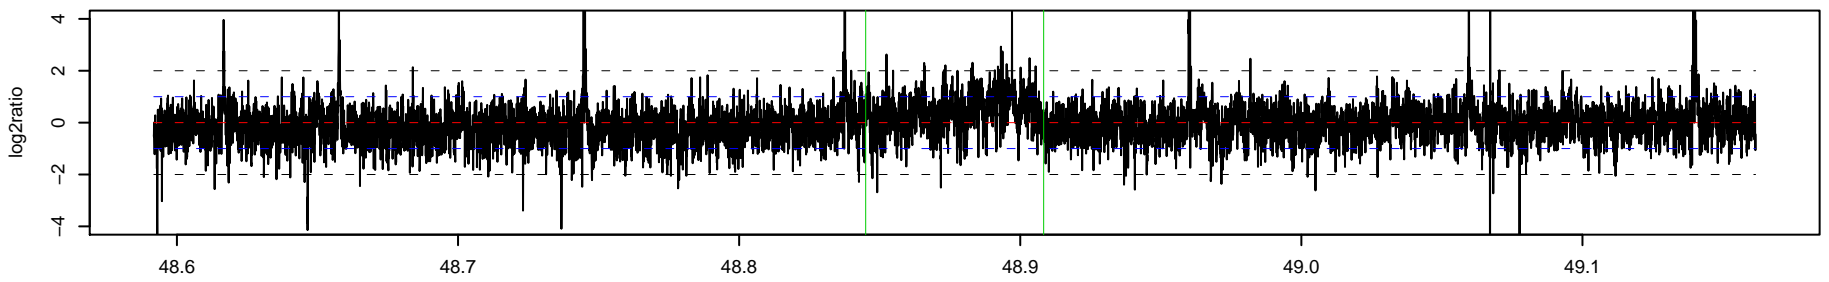

o

o

694 \_ AK1 Chr 16 : 54399874 – 54416595 , 16722 bp (aCGH relative log2ratio= 0.21 )

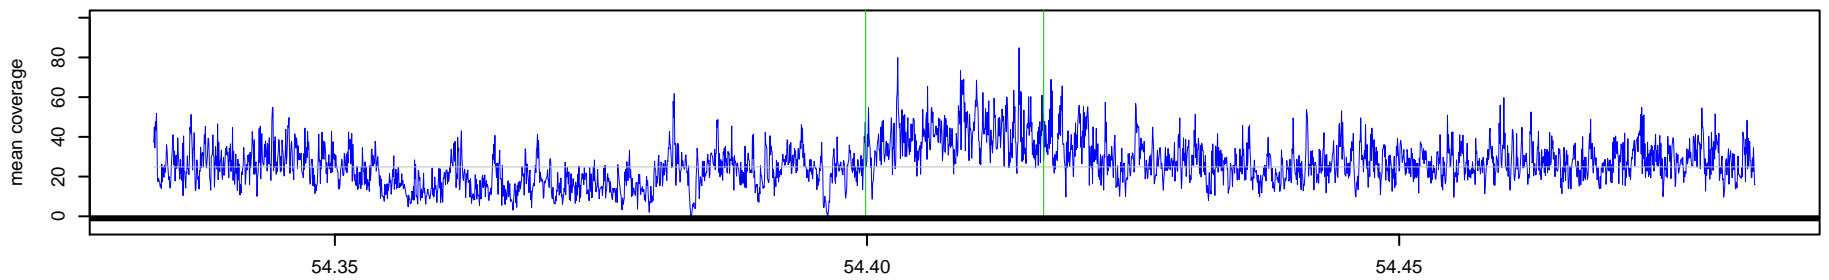

694 \_ NA10851 Chr 16 : 54399874 – 54416595 , 16722 bp (aCGH relative log2ratio= 0.21 )

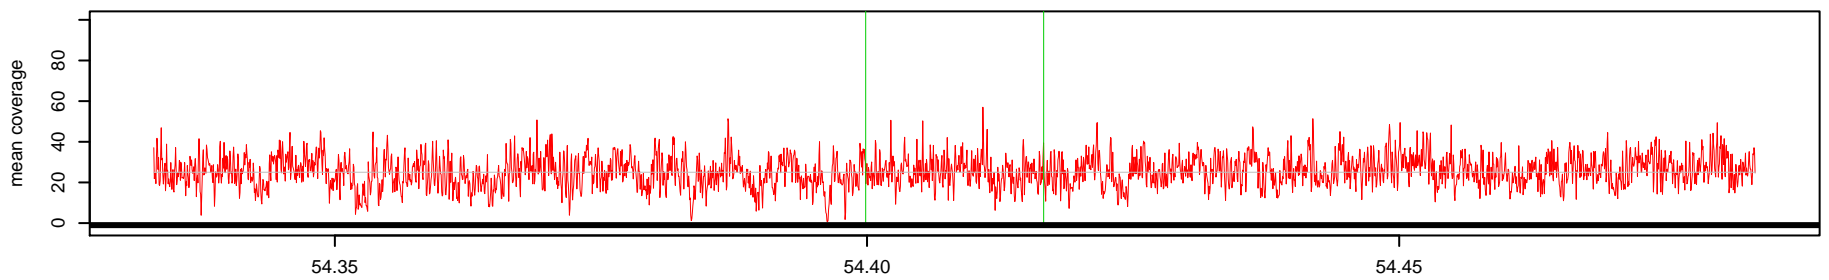

Log2( AK1 read depth / NA10851 read depth)

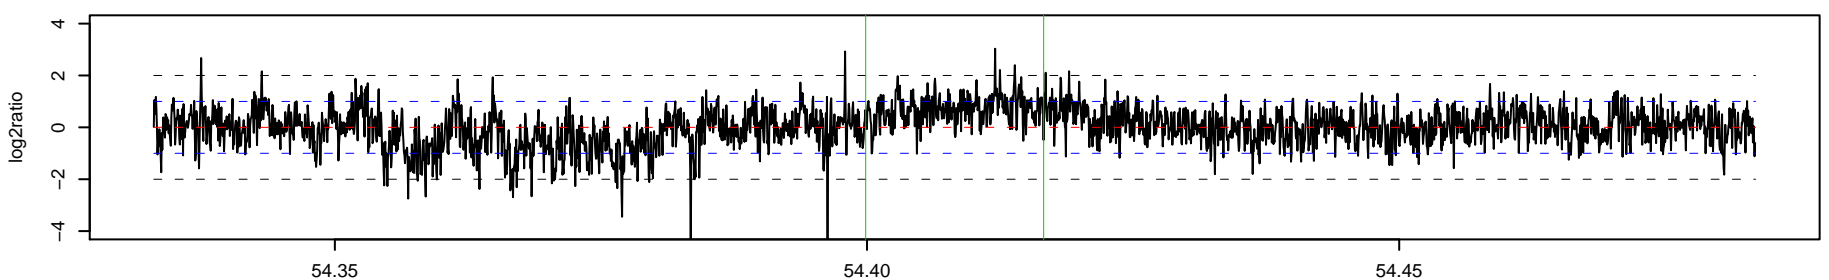

695\_AK1 Chr 16 : 58967090 – 58967528 , 439 bp (aCGH relative log2ratio= 0.63 )

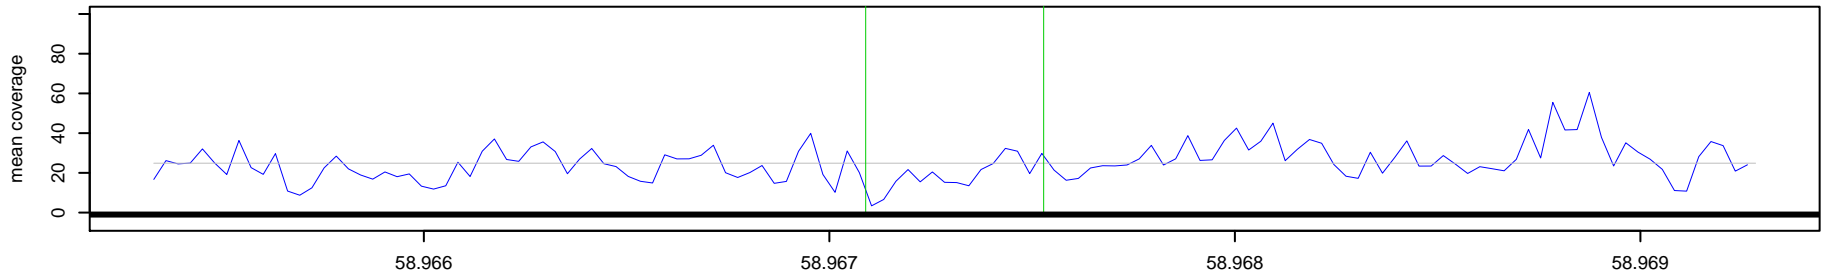

695\_NA10851 Chr 16 : 58967090 – 58967528 , 439 bp (aCGH relative log2ratio= 0.63 )

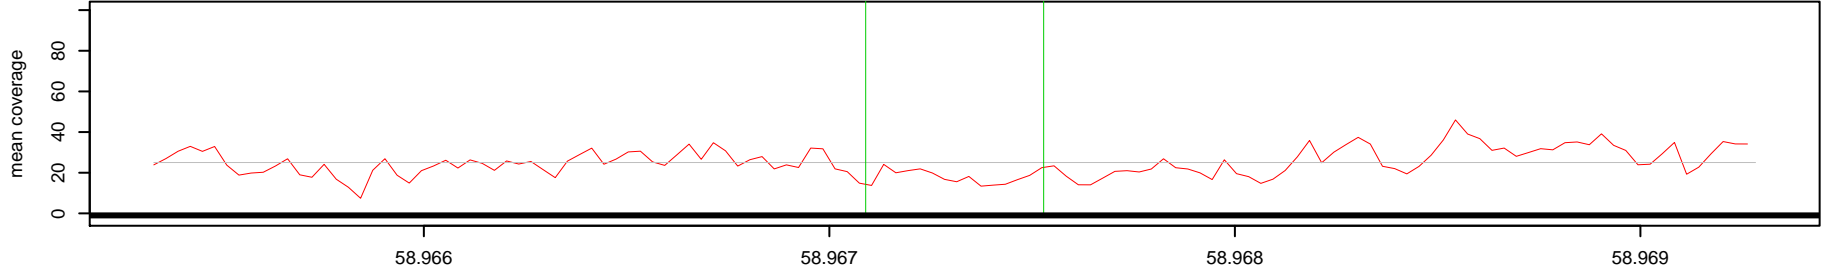

Log2( AK1 read depth / NA10851 read depth)

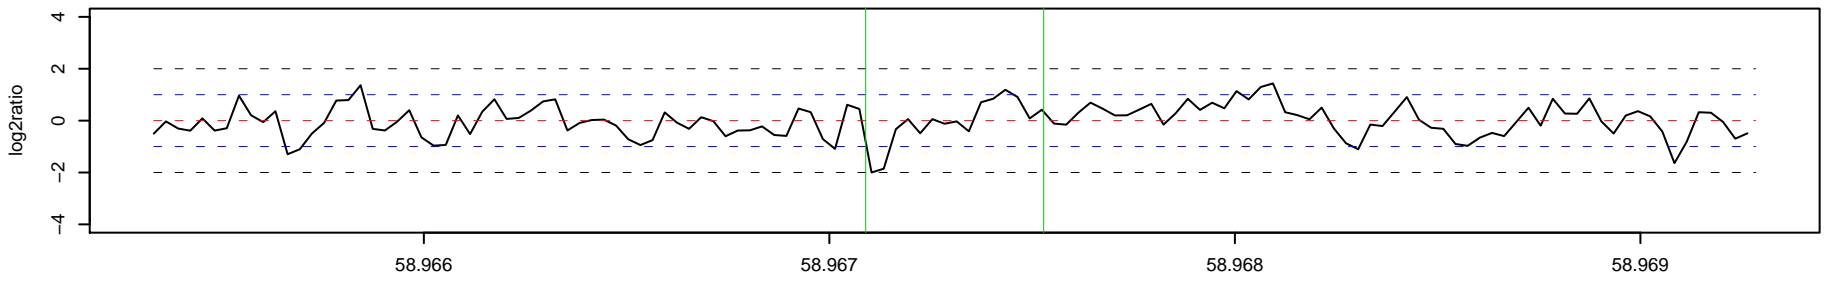

696\_AK1 Chr 16 : 83859962 – 83861827 , 1866 bp (aCGH relative log2ratio= 0.39 )

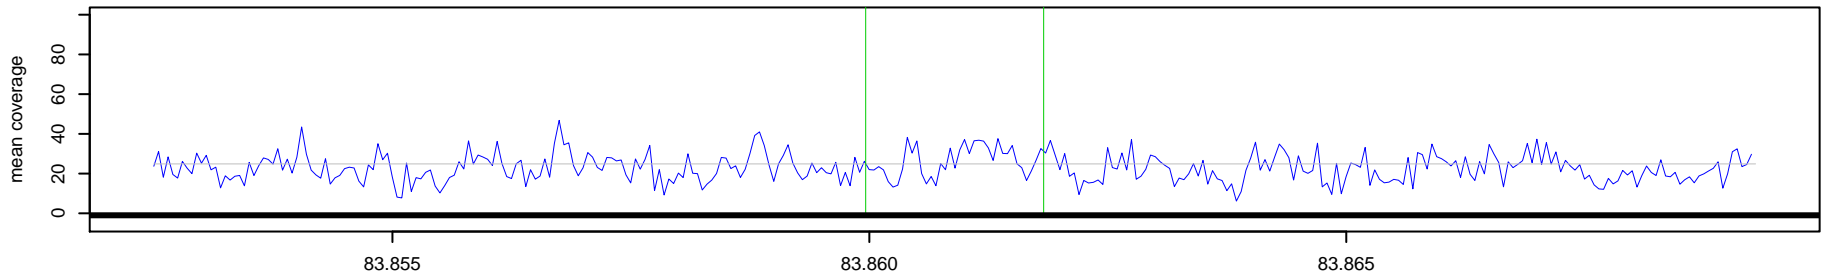

696\_NA10851 Chr 16 : 83859962 – 83861827 , 1866 bp (aCGH relative log2ratio= 0.39 )

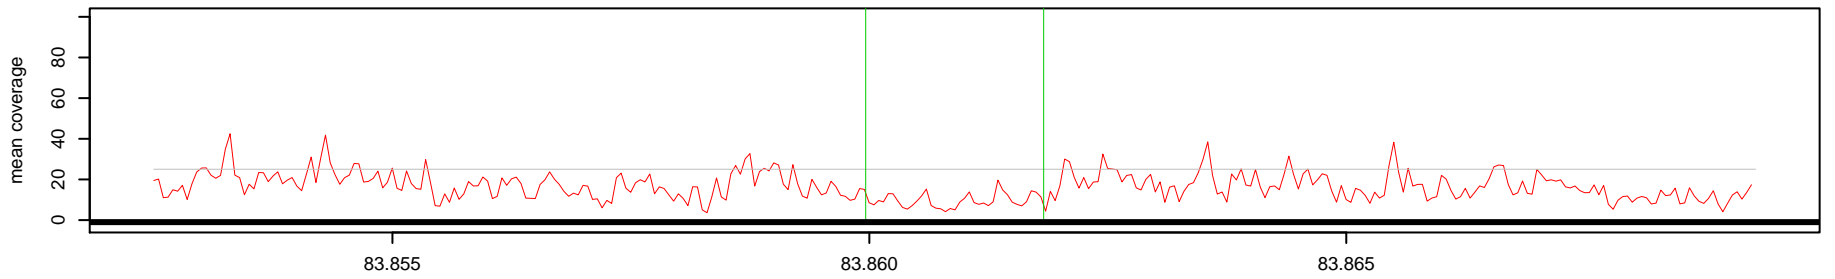

Log2( AK1 read depth / NA10851 read depth)

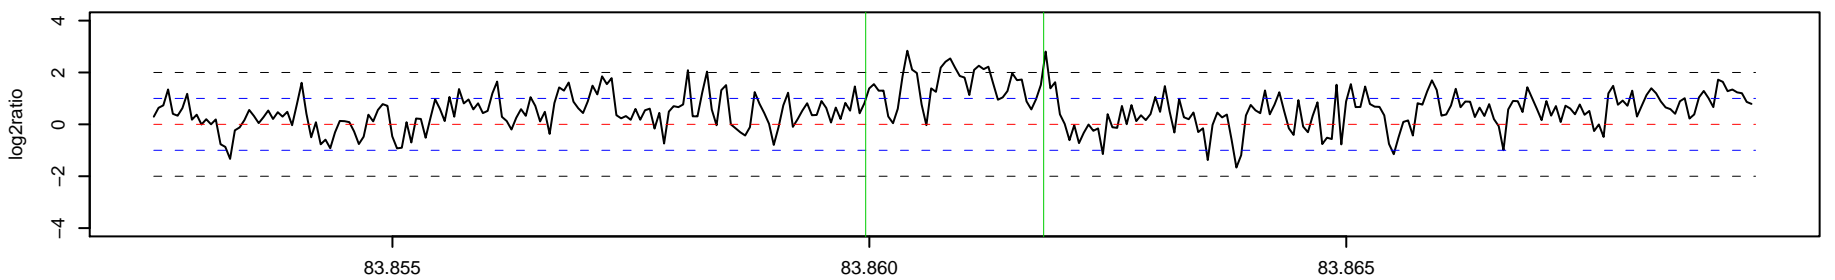



697\_AK1 Chr 16 : 86070396 – 86087379 , 16984 bp (aCGH relative log2ratio= 0.32 )

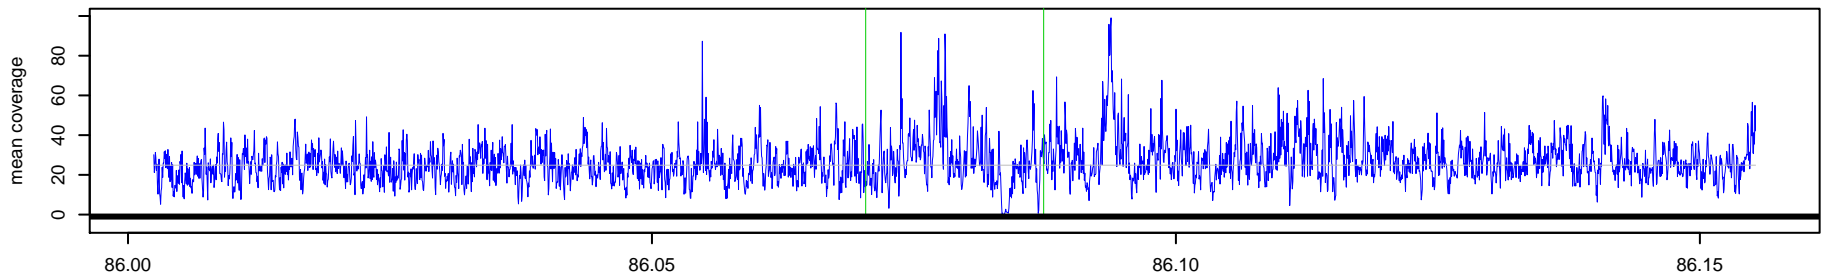

697\_NA10851 Chr 16 : 86070396 – 86087379 , 16984 bp (aCGH relative log2ratio= 0.32 )

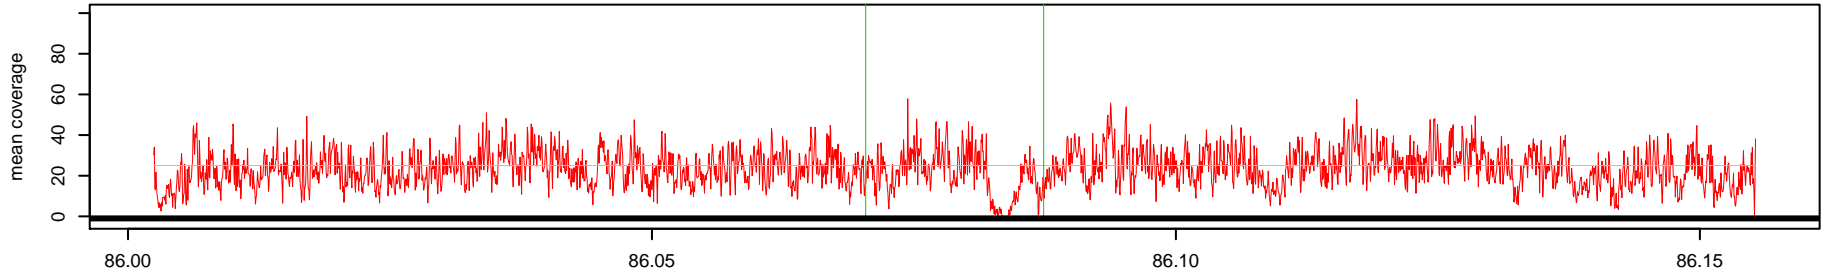

Log2( AK1 read depth / NA10851 read depth)

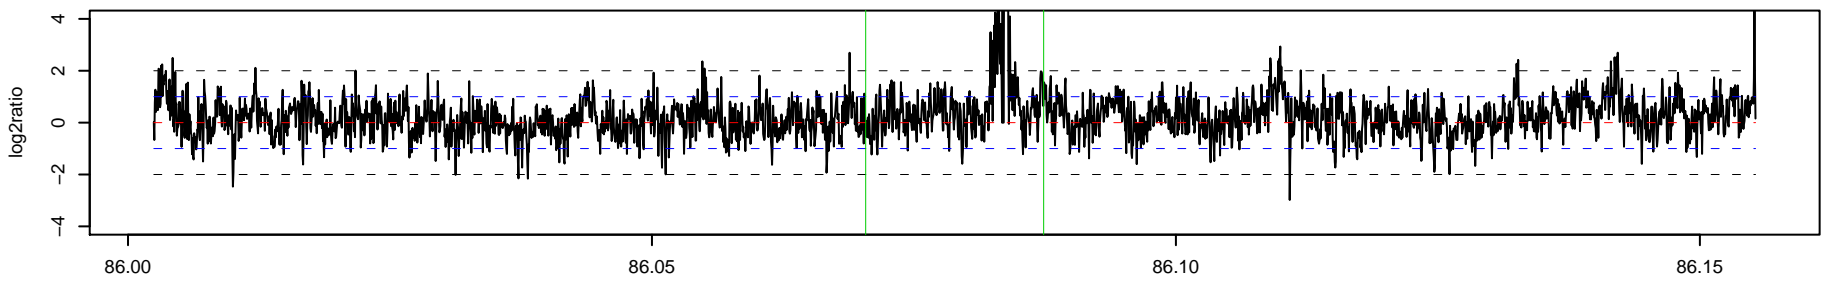

698\_AK1 Chr 17 : 44639714 – 44661756 , 22043 bp (aCGH relative log2ratio= -0.24 )

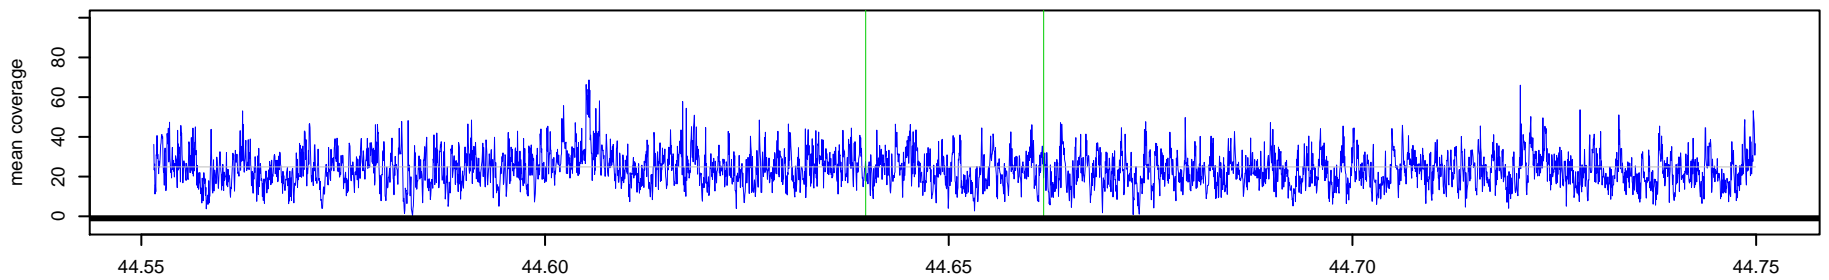

698\_NA10851 Chr 17 : 44639714 – 44661756 , 22043 bp (aCGH relative log2ratio= -0.24 )

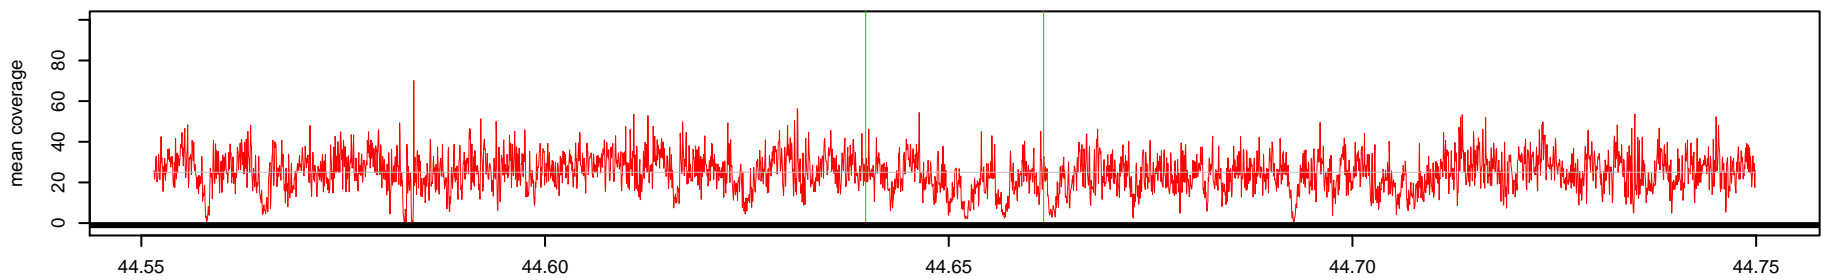

Log2( AK1 read depth / NA10851 read depth)

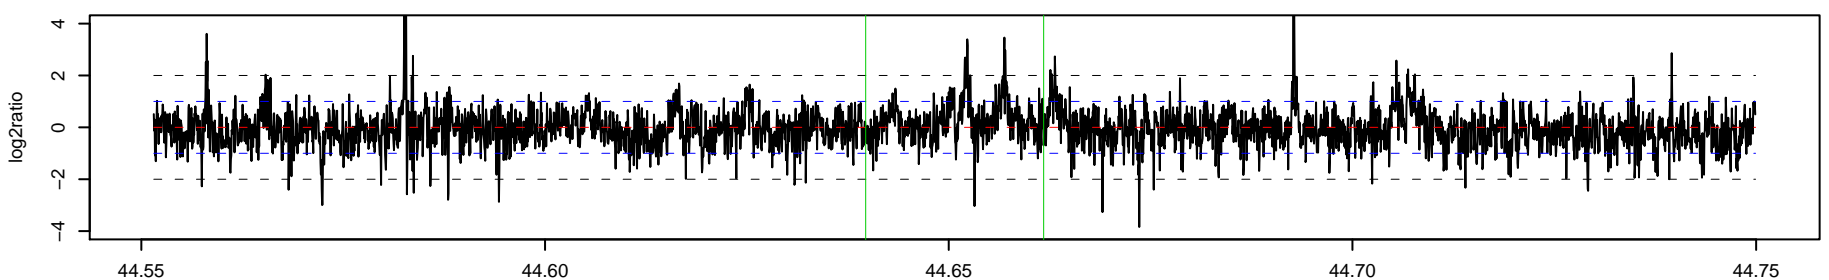

699\_AK1 Chr 18 : 28142158 - 28143226 , 1069 bp (aCGH relative log2ratio= 0.87 )

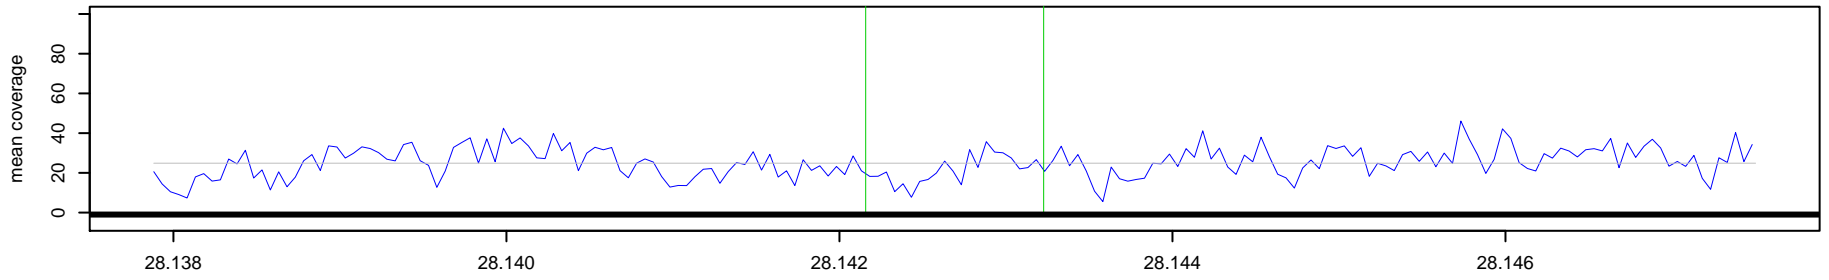

699\_NA10851 Chr 18 : 28142158 - 28143226 , 1069 bp (aCGH relative log2ratio= 0.87 )

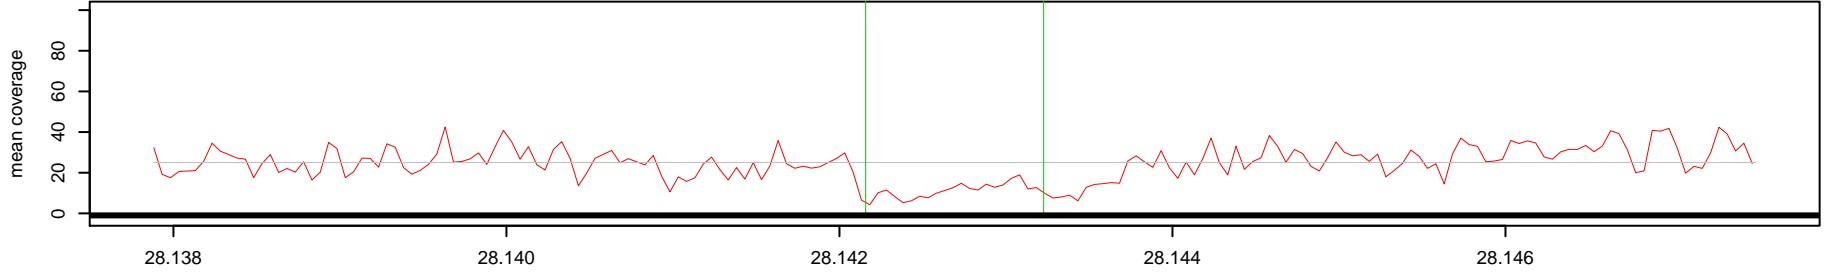

Log2( AK1 read depth / NA10851 read depth)

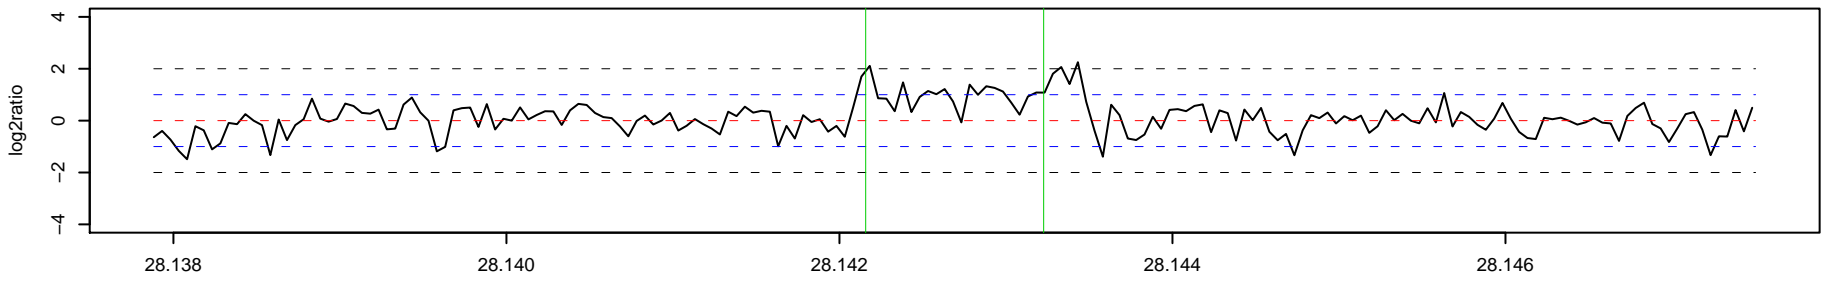

700\_AK1 Chr 18 : 32418559 - 32419146 , 588 bp (aCGH relative log2ratio= 0.56 )

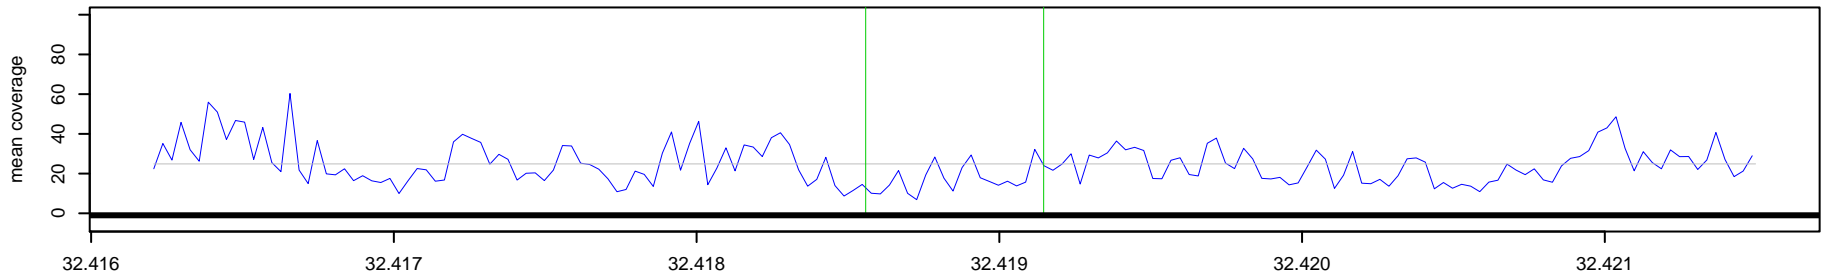

700\_NA10851 Chr 18 : 32418559 - 32419146 , 588 bp (aCGH relative log2ratio= 0.56 )

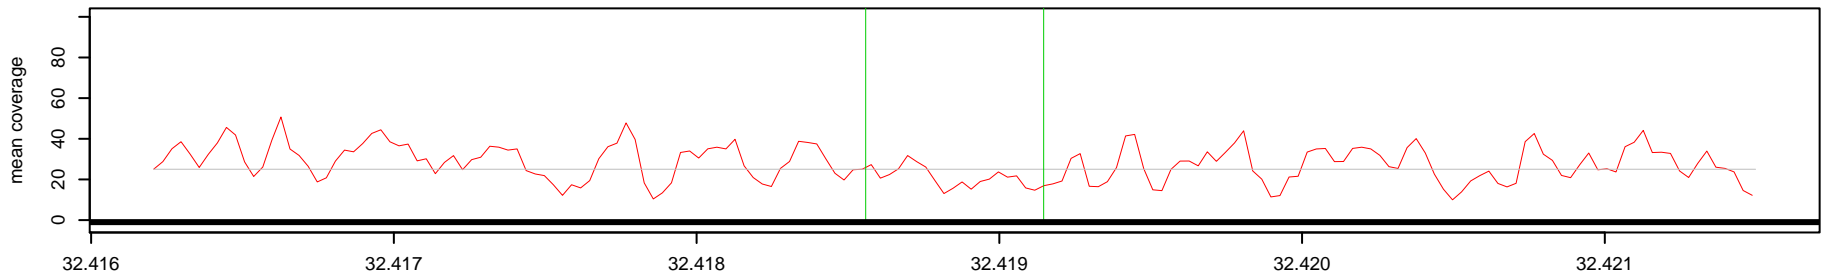

Log2( AK1 read depth / NA10851 read depth)

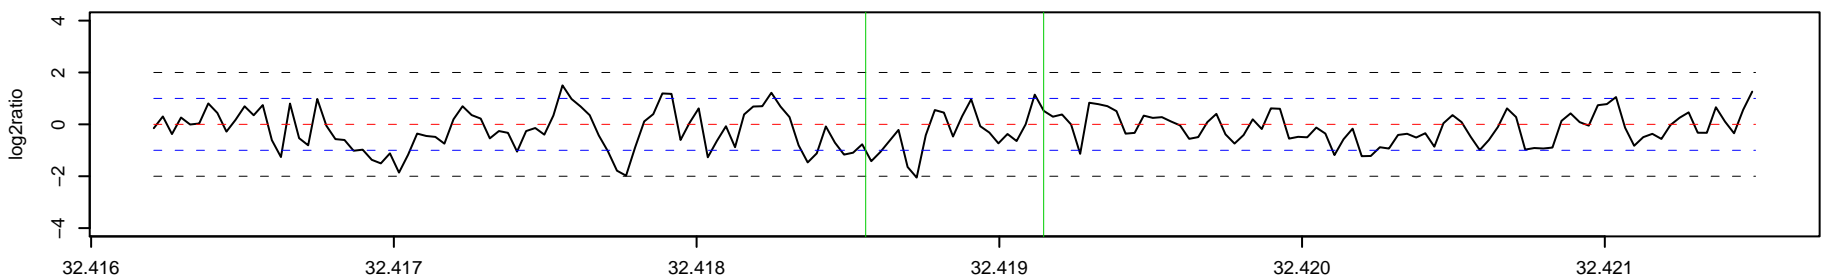

701\_AK1 Chr 18 : 53618431 – 53618929 , 499 bp (aCGH relative log2ratio= 0.58 )

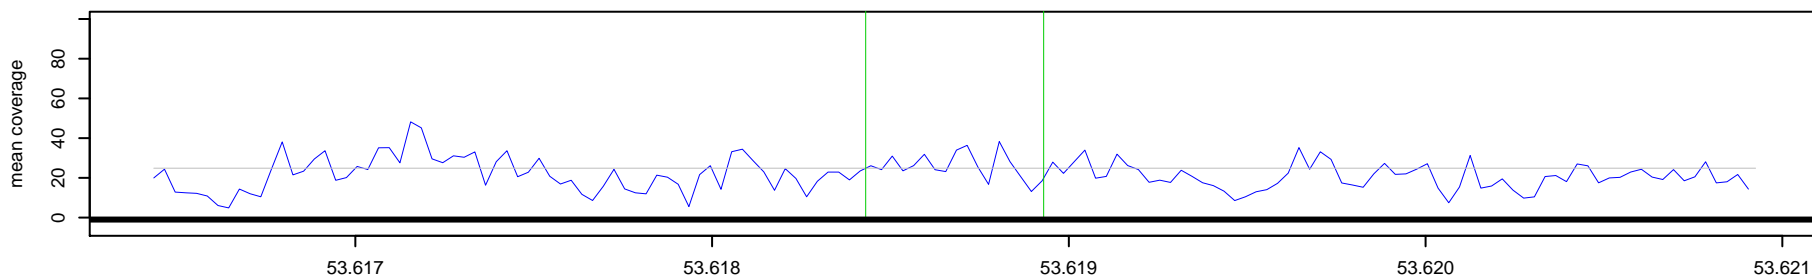

701\_NA10851 Chr 18 : 53618431 – 53618929 , 499 bp (aCGH relative log2ratio= 0.58 )

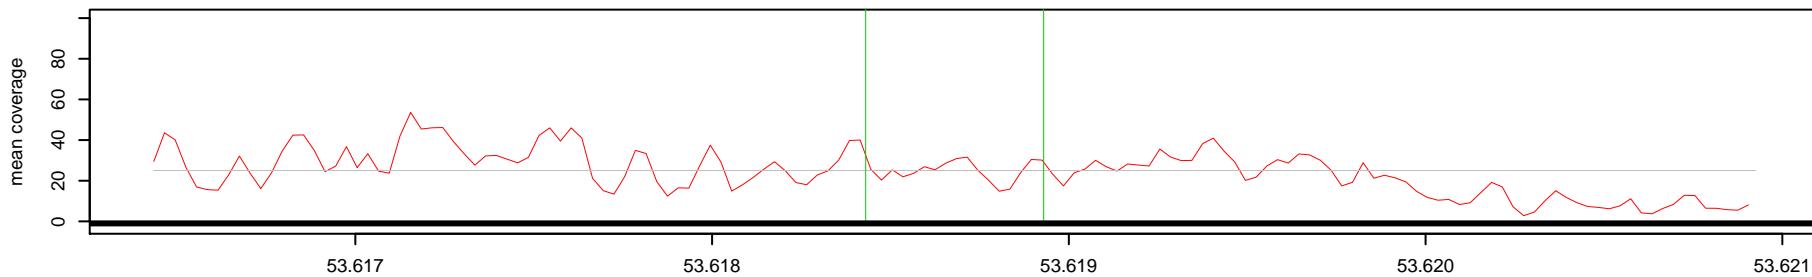

Log2( AK1 read depth / NA10851 read depth)

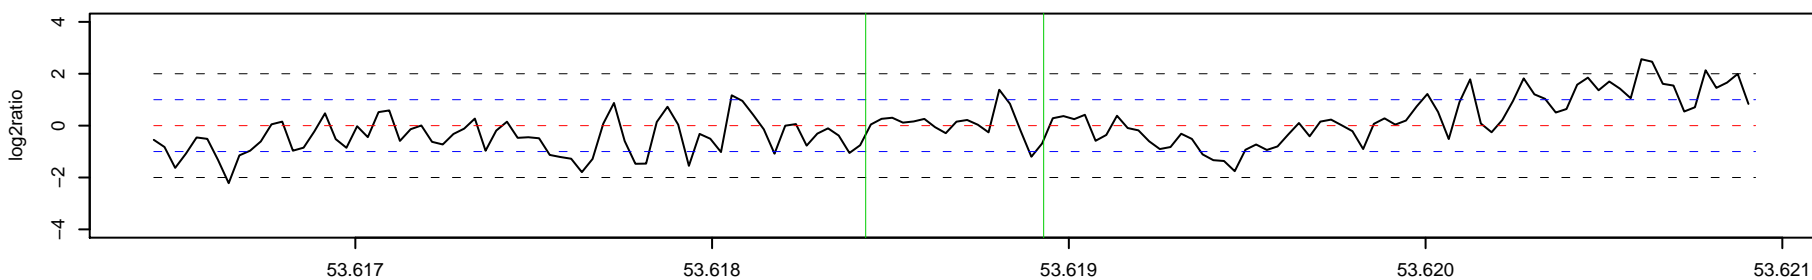

702\_AK1 Chr 18 : 74390776 – 74398283 , 7508 bp (aCGH relative log2ratio= 0.48 )

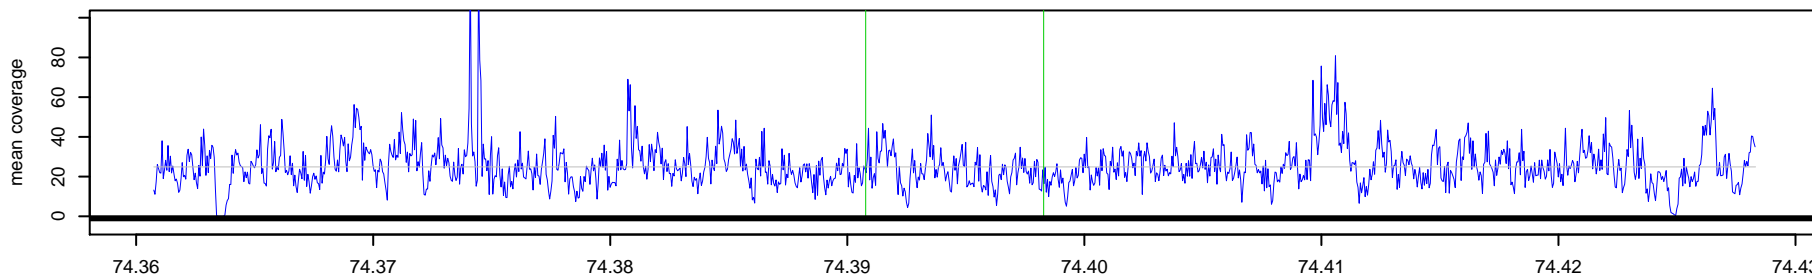

702\_NA10851 Chr 18 : 74390776 – 74398283 , 7508 bp (aCGH relative log2ratio= 0.48 )

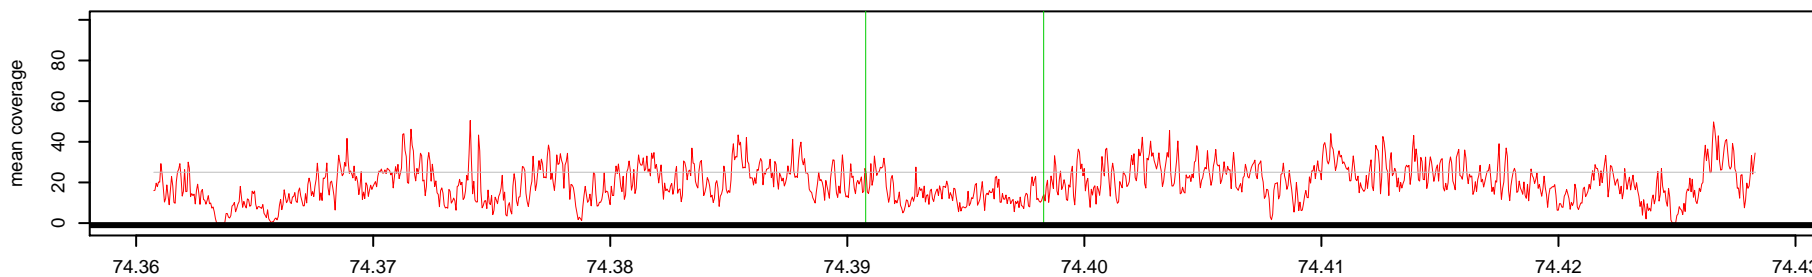

Log2( AK1 read depth / NA10851 read depth)

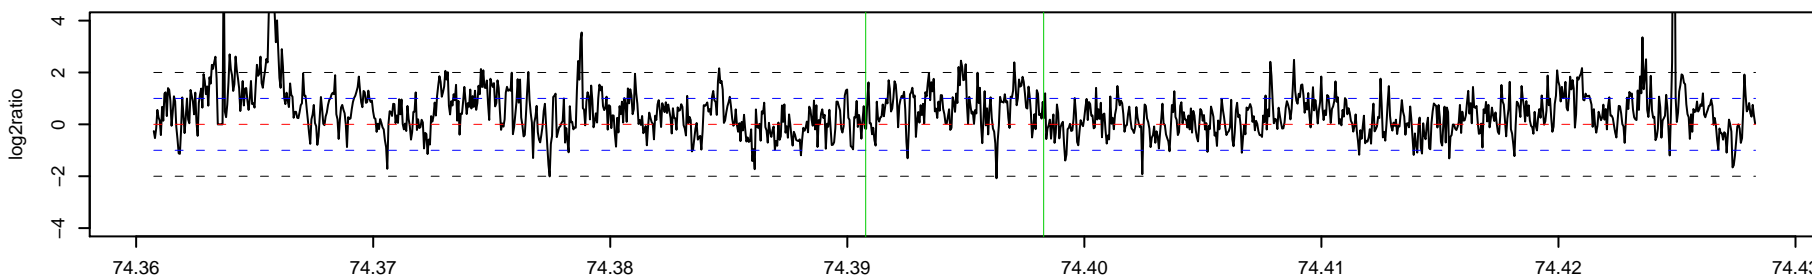

703\_AK1 Chr 19 : 1185503 - 1186595 , 1093 bp (aCGH relative log2ratio= -0.56 )

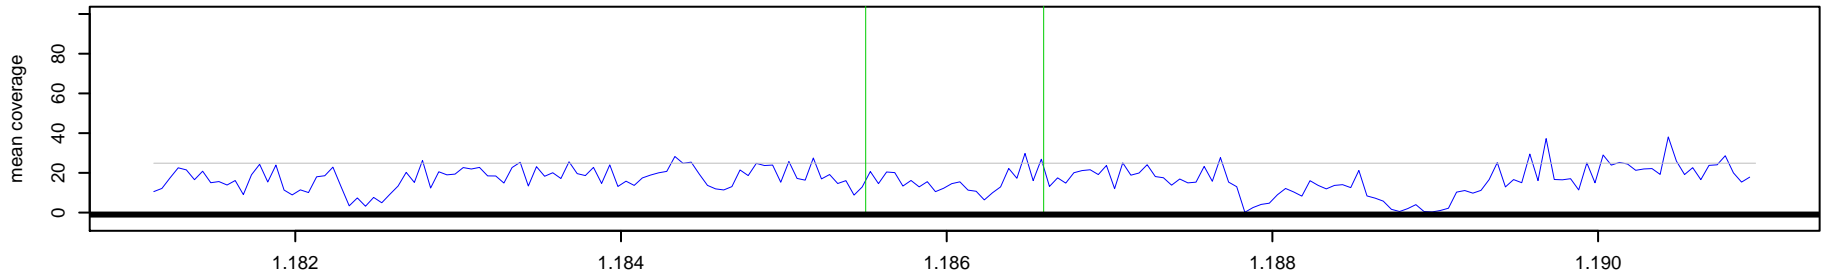

703\_NA10851 Chr 19 : 1185503 - 1186595 , 1093 bp (aCGH relative log2ratio= -0.56 )

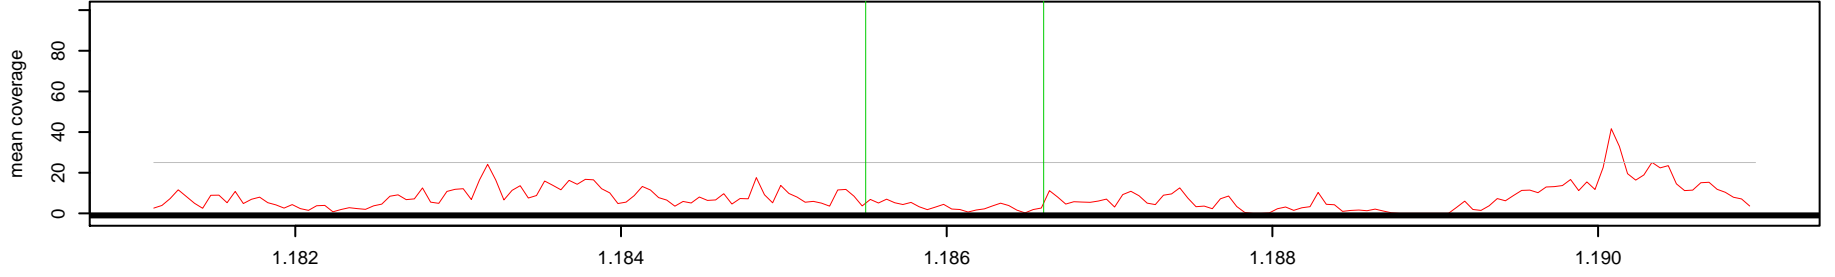

Log2( AK1 read depth / NA10851 read depth)

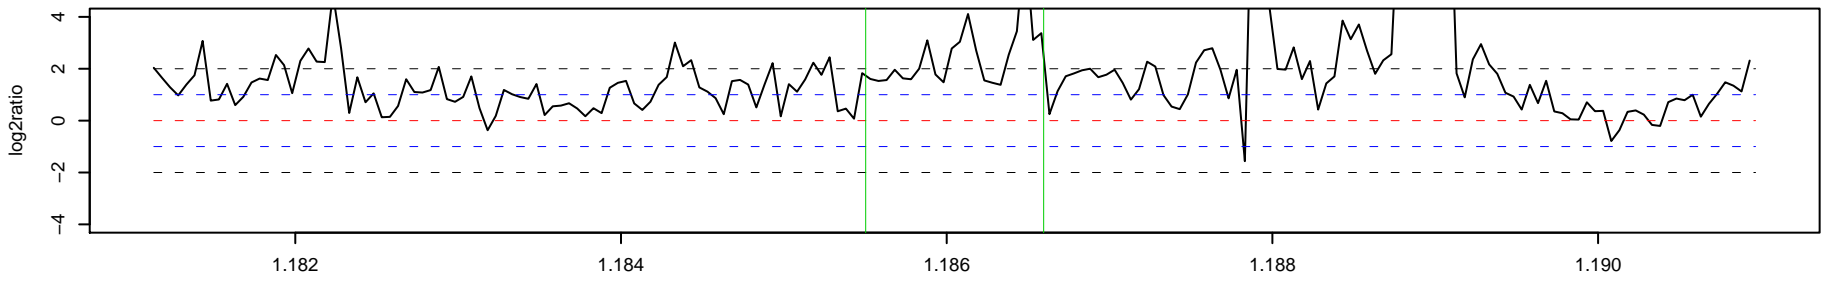

o

o

704\_AK1 Chr 19 : 1901283 - 1902510 , 1228 bp (aCGH relative log2ratio= 0.52 )

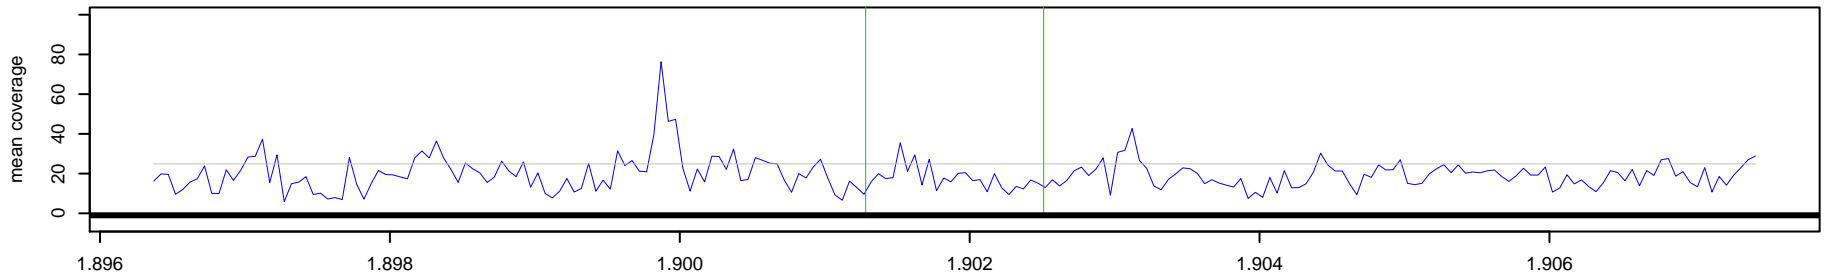

704\_NA10851 Chr 19 : 1901283 - 1902510 , 1228 bp (aCGH relative log2ratio= 0.52 )

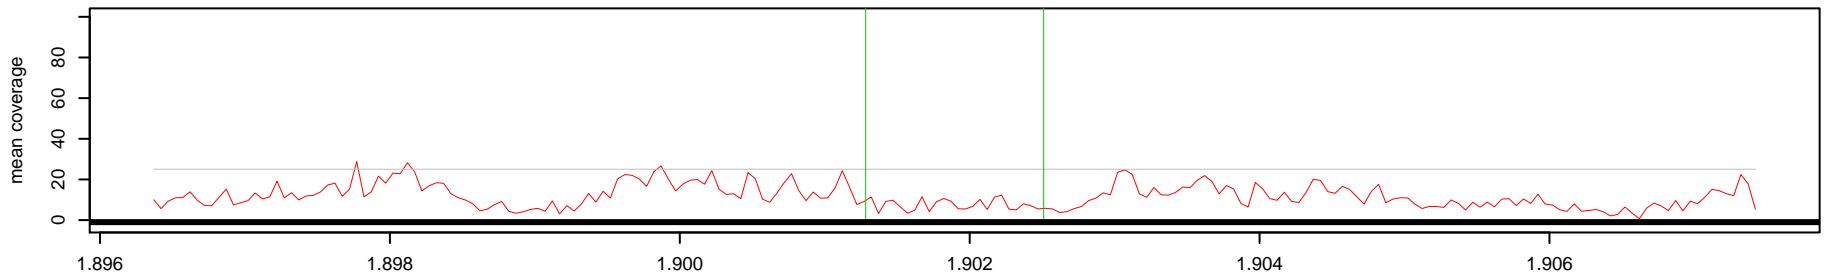

Log2( AK1 read depth / NA10851 read depth)

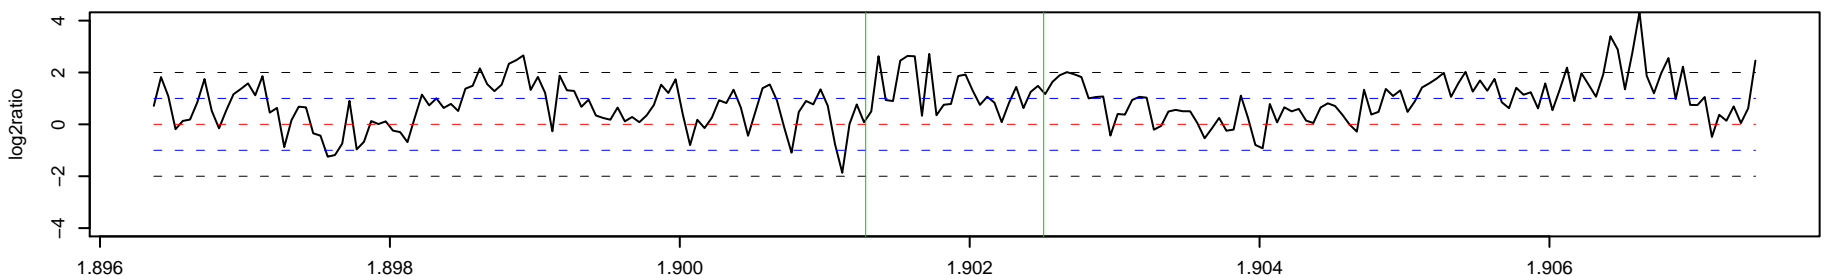

705\_AK1 Chr 19 : 5076318 – 5076829 , 512 bp (aCGH relative log2ratio= -0.74 )

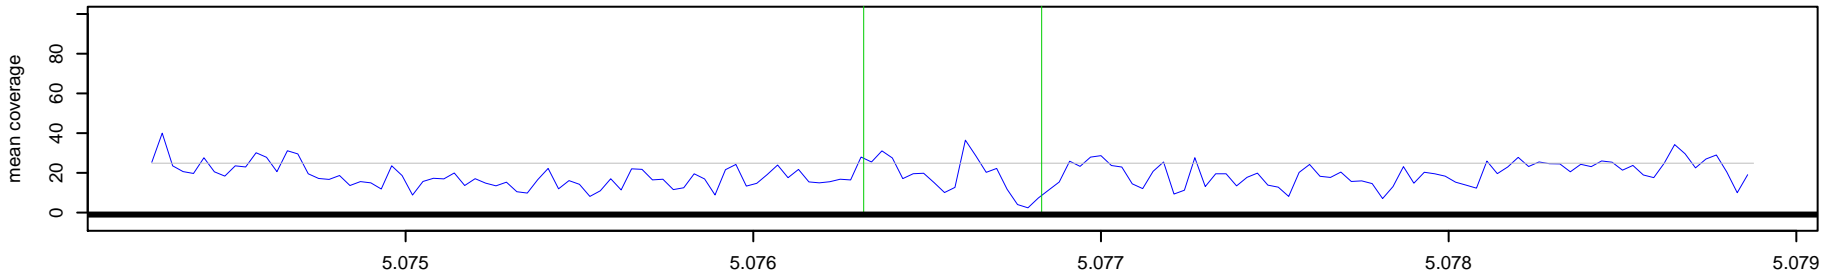

705\_NA10851 Chr 19 : 5076318 – 5076829 , 512 bp (aCGH relative log2ratio= -0.74 )

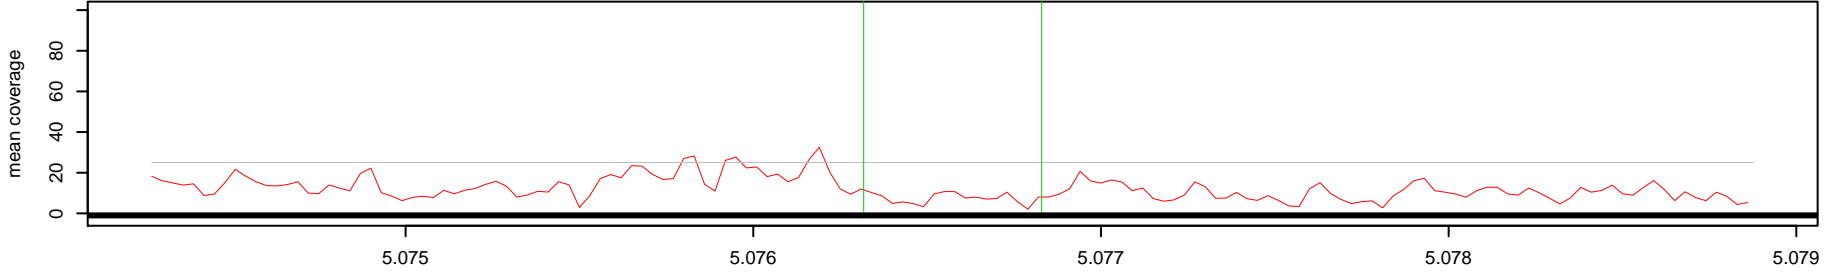

Log2( AK1 read depth / NA10851 read depth)

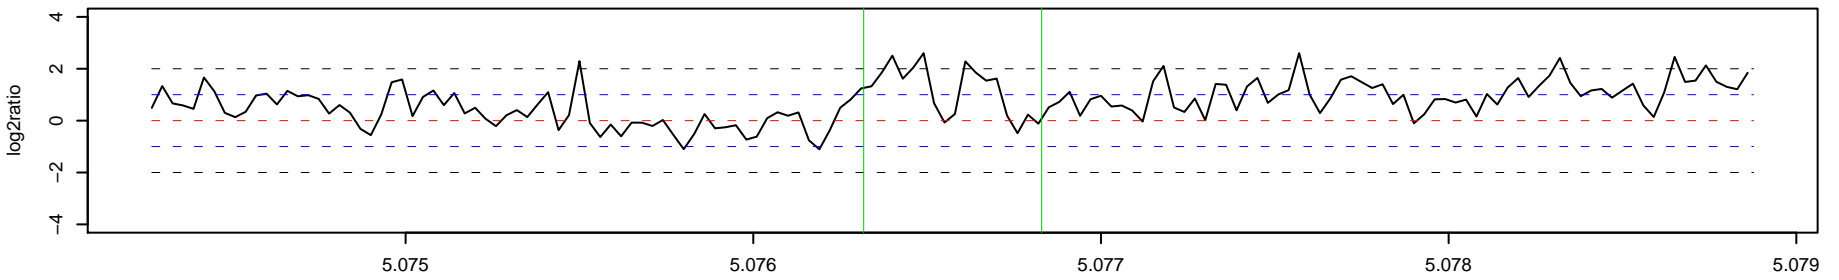

706\_AK1 Chr 19 : 9146725 – 9151083 , 4359 bp (aCGH relative log2ratio= 2.18 )

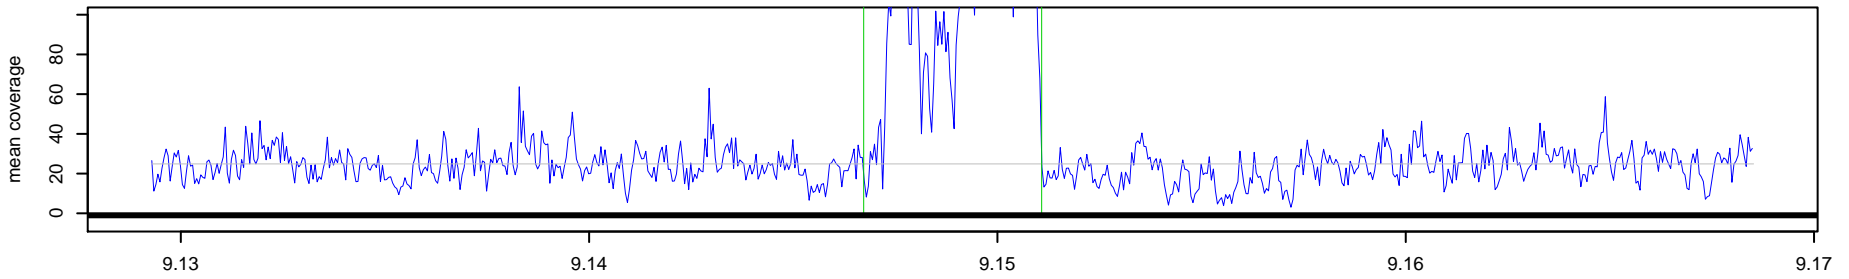

706\_NA10851 Chr 19 : 9146725 – 9151083 , 4359 bp (aCGH relative log2ratio= 2.18 )

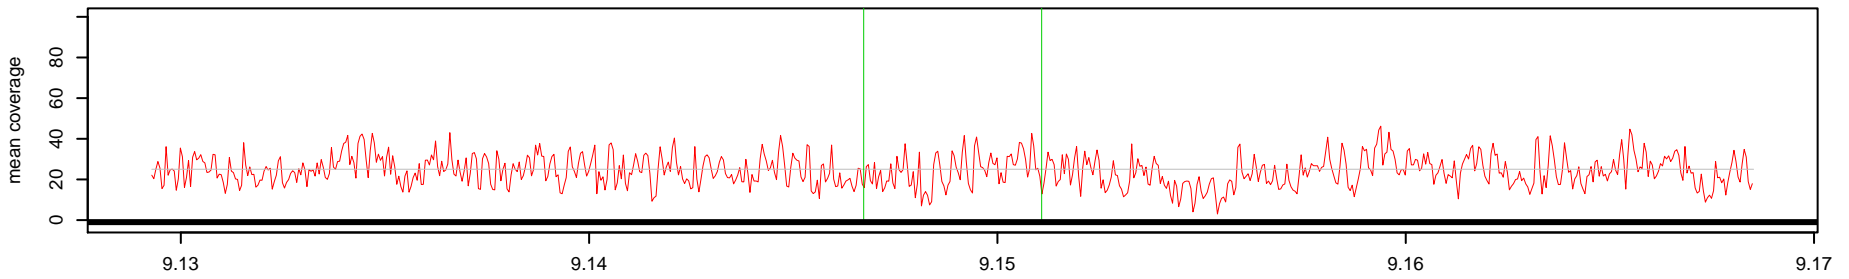

Log2( AK1 read depth / NA10851 read depth)

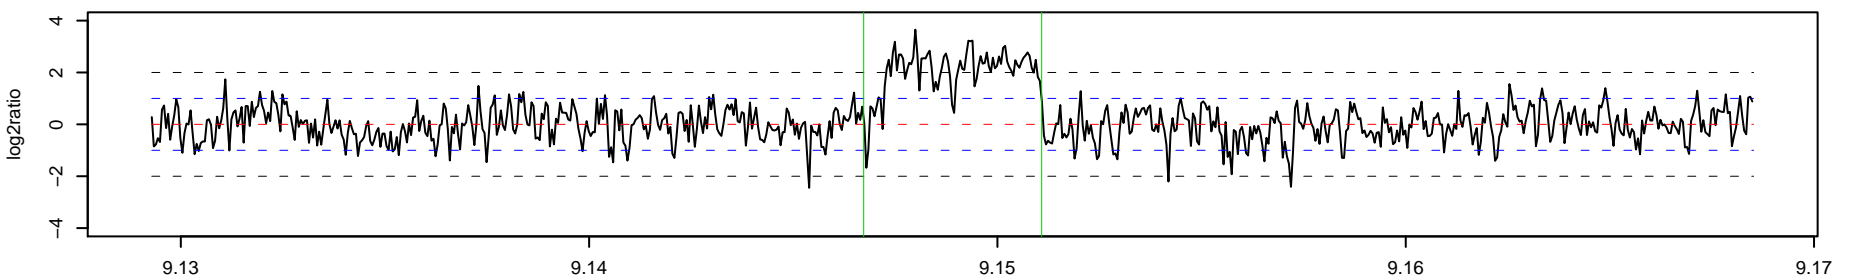

707\_AK1 Chr 19 : 12556130 – 12556903 , 774 bp (aCGH relative log2ratio= 0.73 )

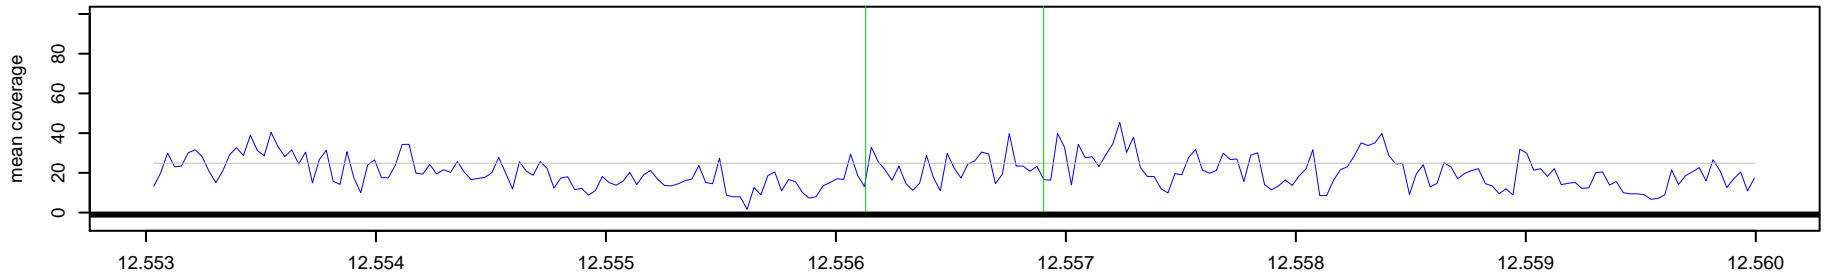

707\_NA10851 Chr 19 : 12556130 – 12556903 , 774 bp (aCGH relative log2ratio= 0.73 )

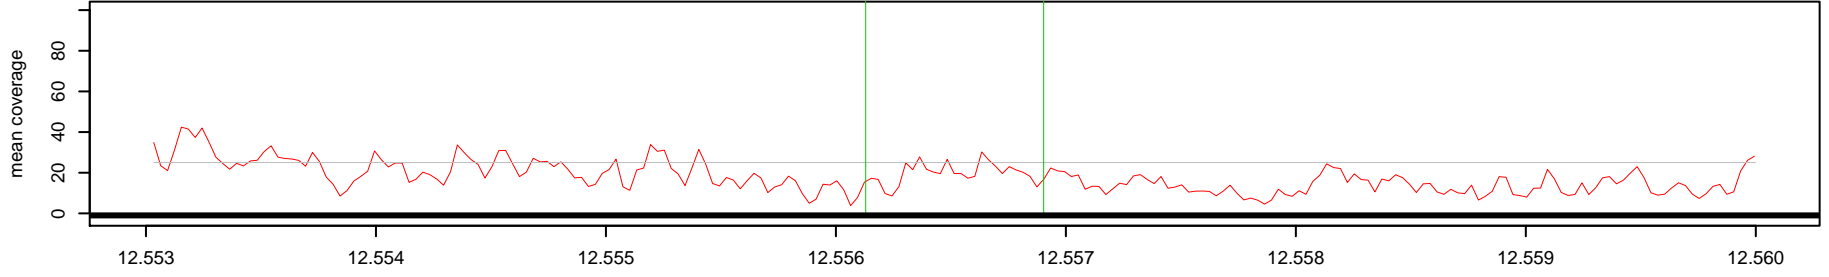

Log2( AK1 read depth / NA10851 read depth)

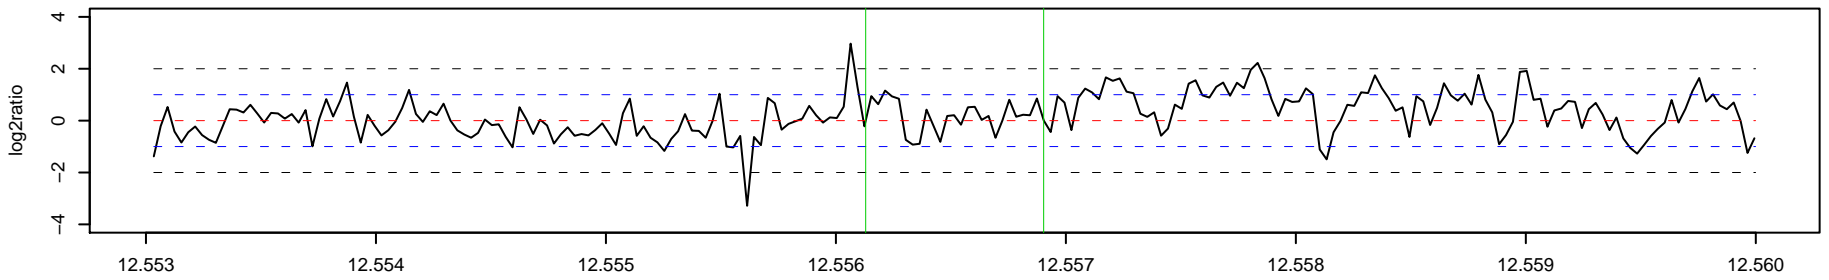

708\_AK1 Chr 19 : 12614299 – 12614899 , 601 bp (aCGH relative log2ratio= -0.78 )

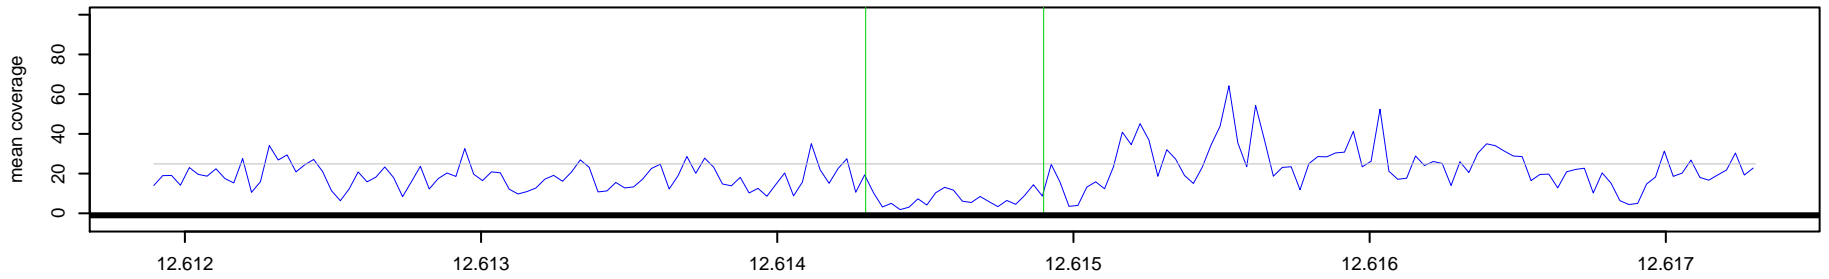

708\_NA10851 Chr 19 : 12614299 – 12614899 , 601 bp (aCGH relative log2ratio= -0.78 )

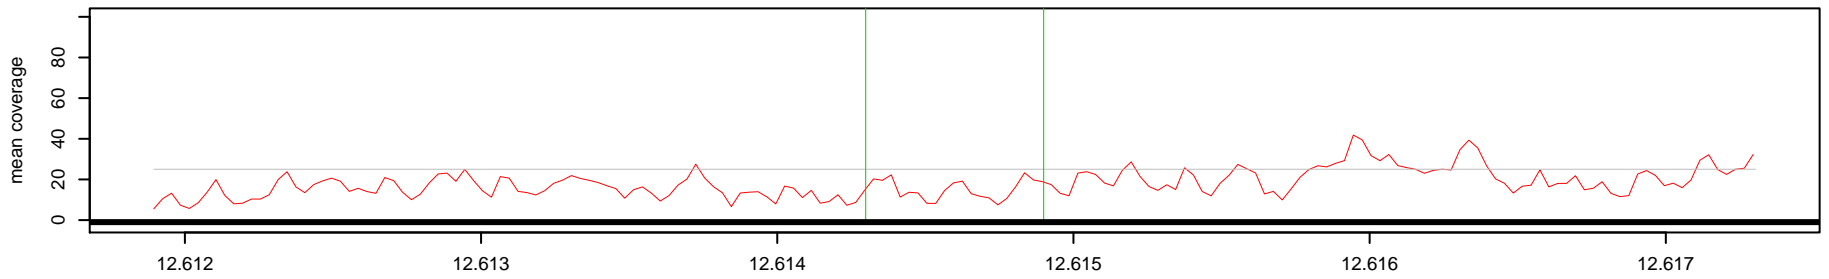

Log2( AK1 read depth / NA10851 read depth)

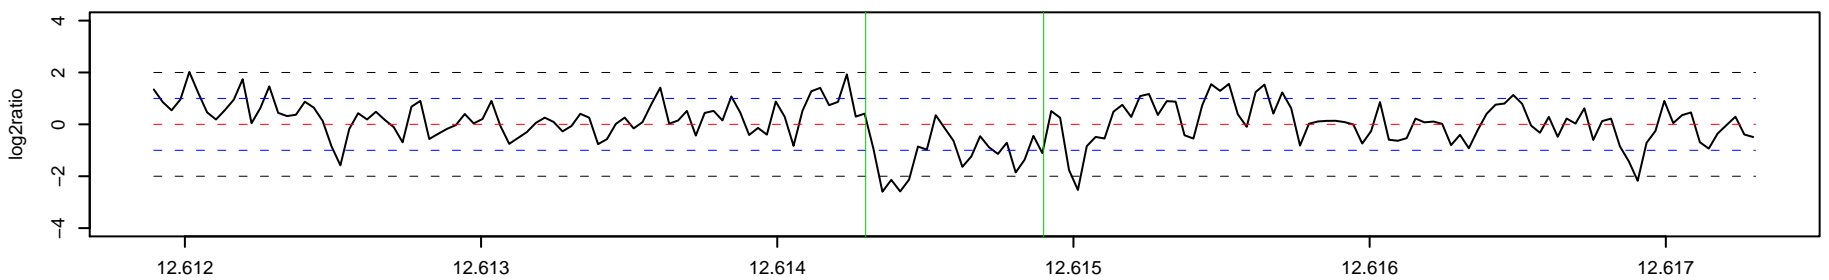

709\_AK1 Chr 19 : 18150598 – 18172602 , 22005 bp (aCGH relative log2ratio= 0.26 )

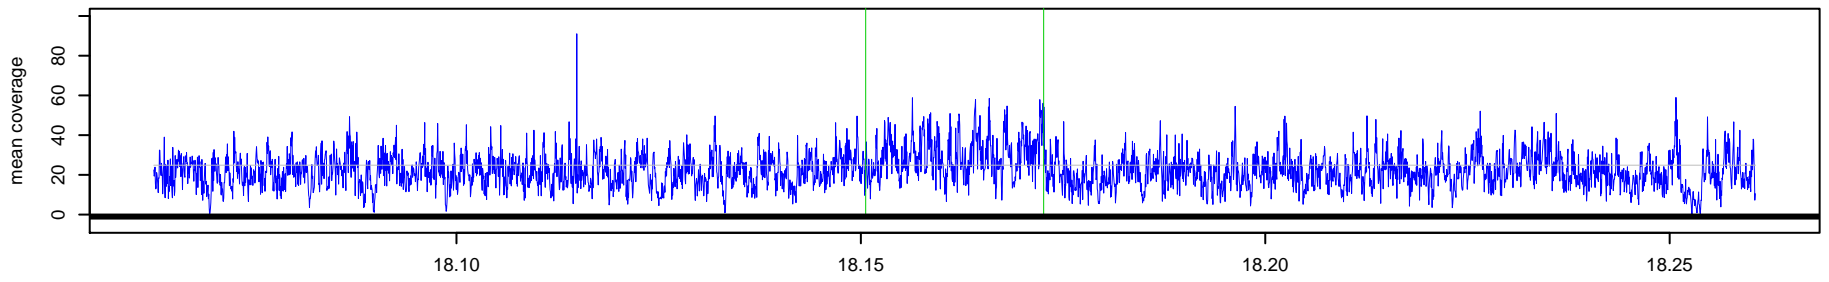

709\_NA10851 Chr 19 : 18150598 – 18172602 , 22005 bp (aCGH relative log2ratio= 0.26 )

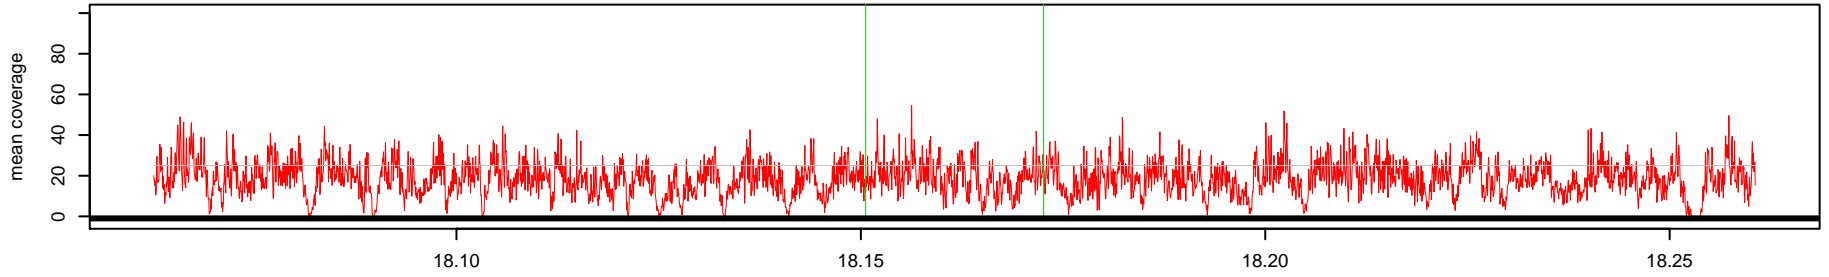

Log2( AK1 read depth / NA10851 read depth)

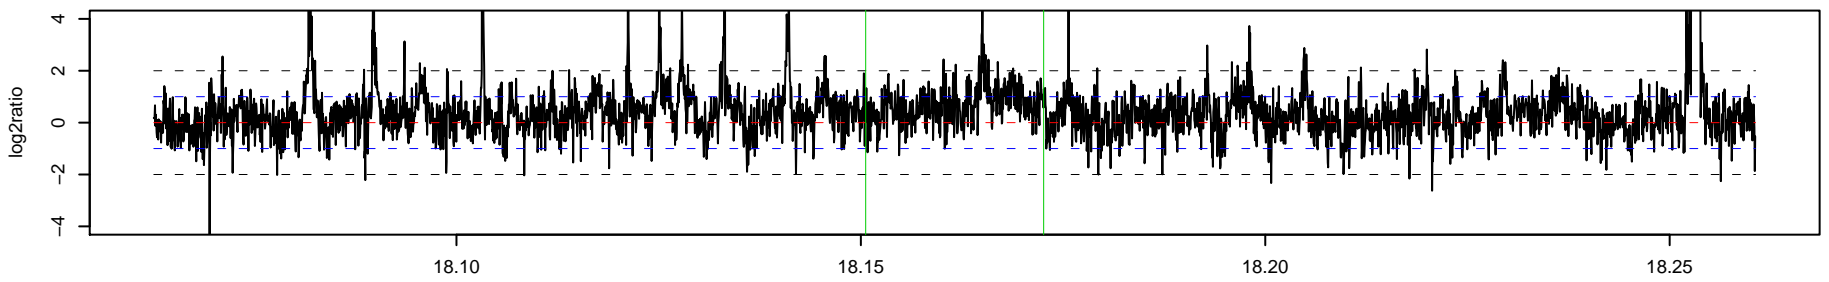

710\_AK1 Chr 19 : 22348572 – 22350525 , 1954 bp (aCGH relative log2ratio= 0.92 )

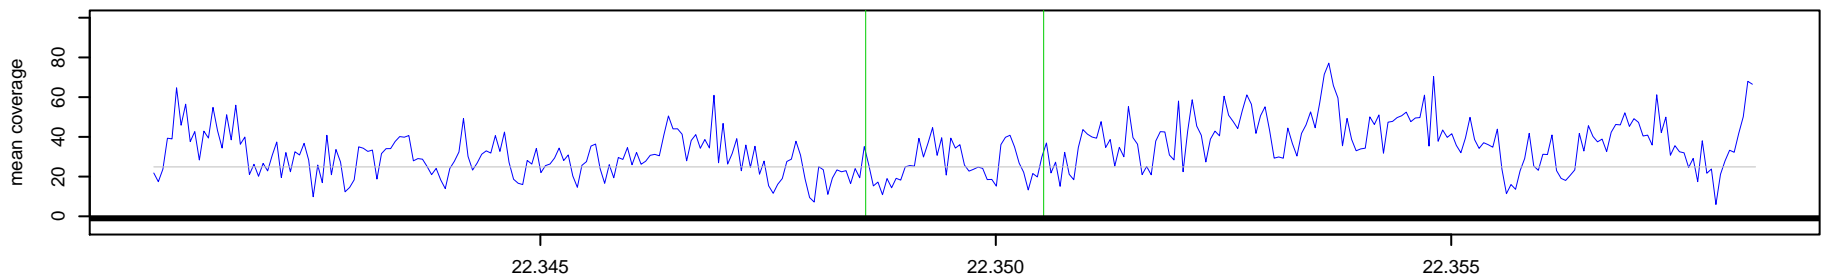

710\_NA10851 Chr 19 : 22348572 – 22350525 , 1954 bp (aCGH relative log2ratio= 0.92 )

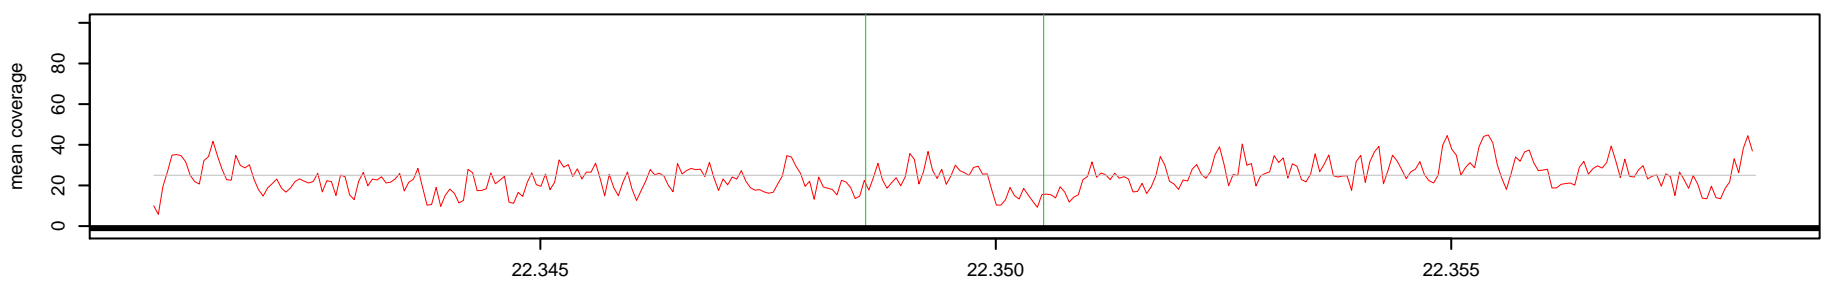

Log2( AK1 read depth / NA10851 read depth)

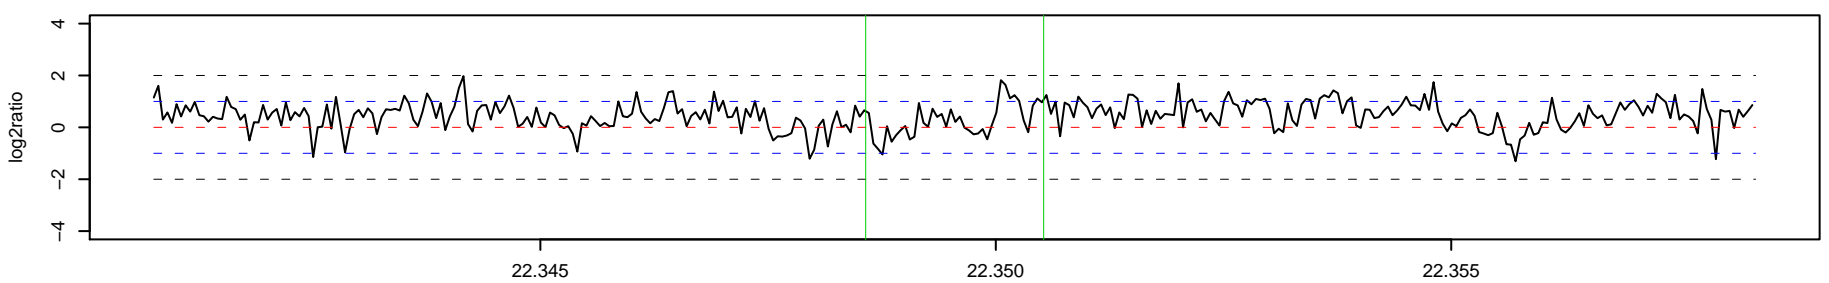

711\_AK1 Chr 19 : 23010551 – 23012171 , 1621 bp (aCGH relative log2ratio= 1.10 )

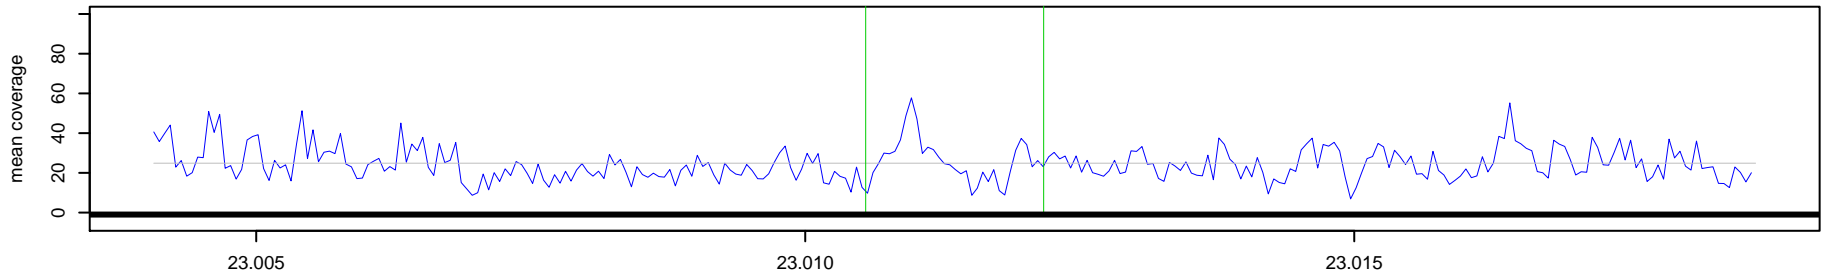

711\_NA10851 Chr 19 : 23010551 – 23012171 , 1621 bp (aCGH relative log2ratio= 1.10 )

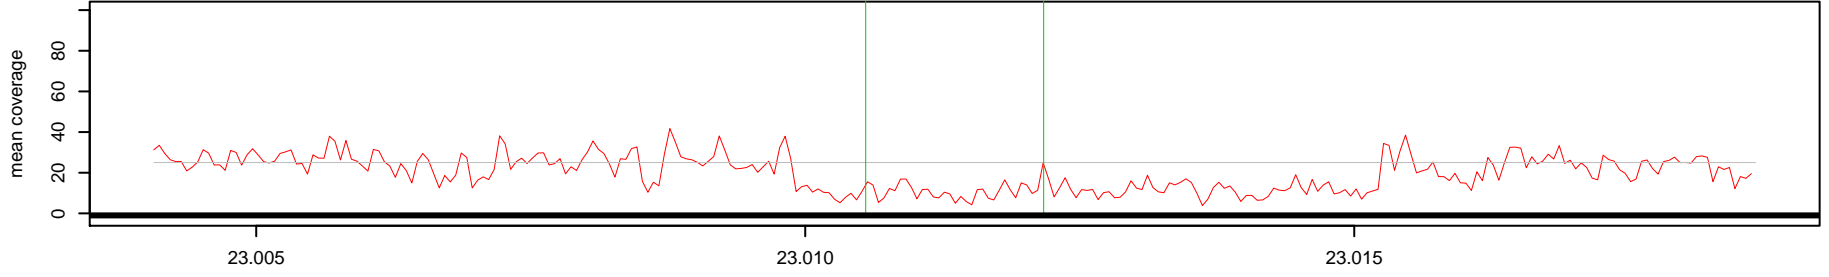

Log2( AK1 read depth / NA10851 read depth )

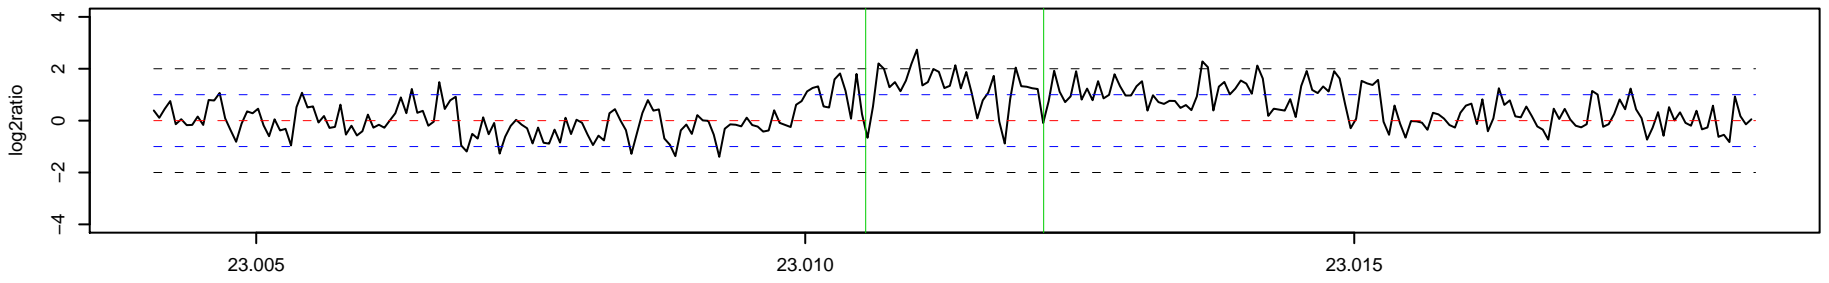

712\_AK1 Chr 19 : 40353102 – 40356844 , 3743 bp (aCGH relative log2ratio= -1.18 )

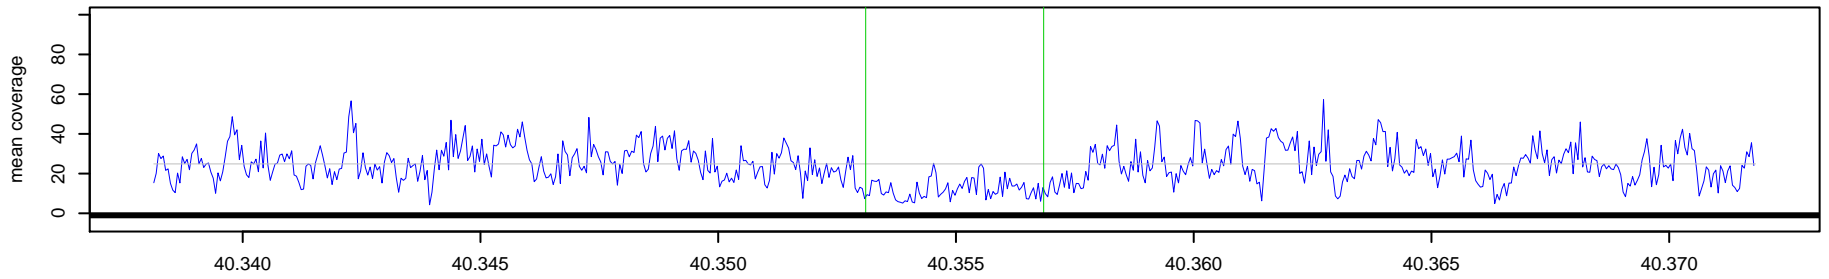

712\_NA10851 Chr 19 : 40353102 – 40356844 , 3743 bp (aCGH relative log2ratio= -1.18 )

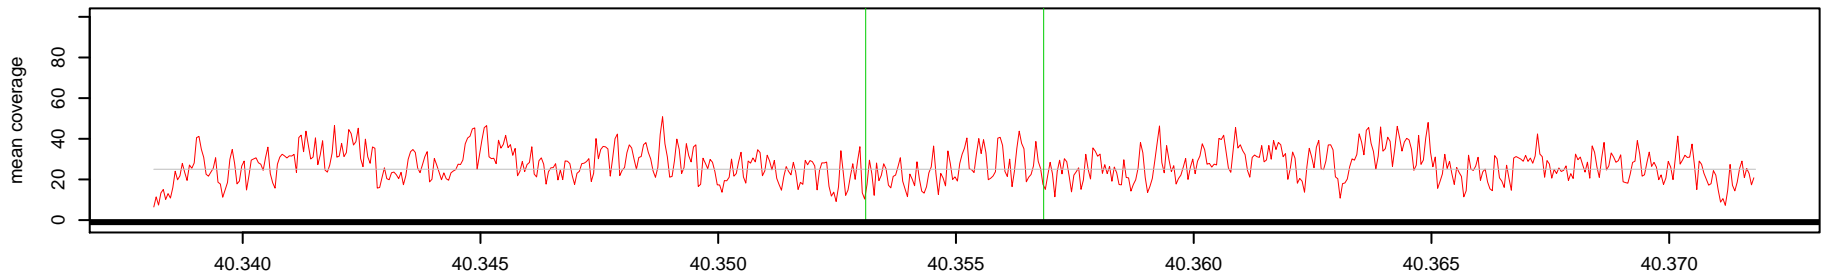

Log2( AK1 read depth / NA10851 read depth )

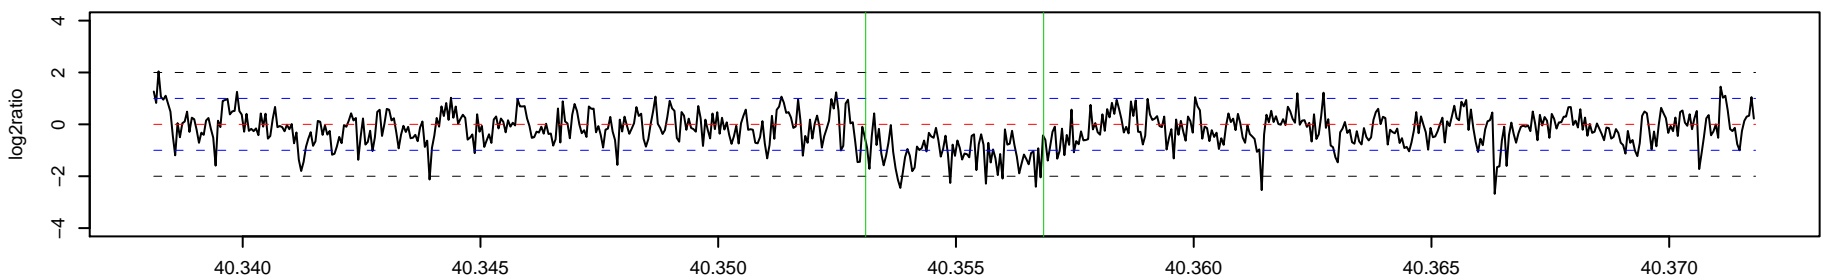



713\_AK1 Chr 19 : 40540663 – 40556212 , 15550 bp (aCGH relative log2ratio= 0.21 )

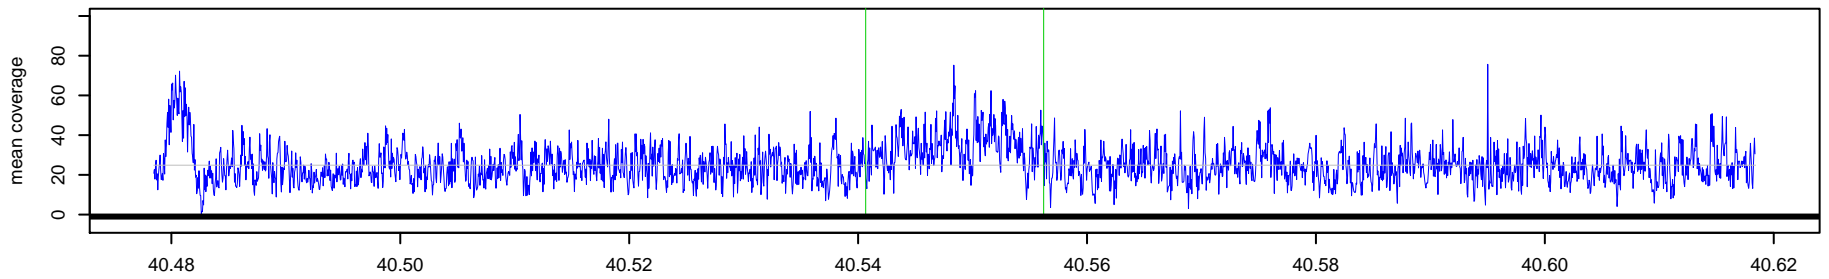

713\_NA10851 Chr 19 : 40540663 – 40556212 , 15550 bp (aCGH relative log2ratio= 0.21 )

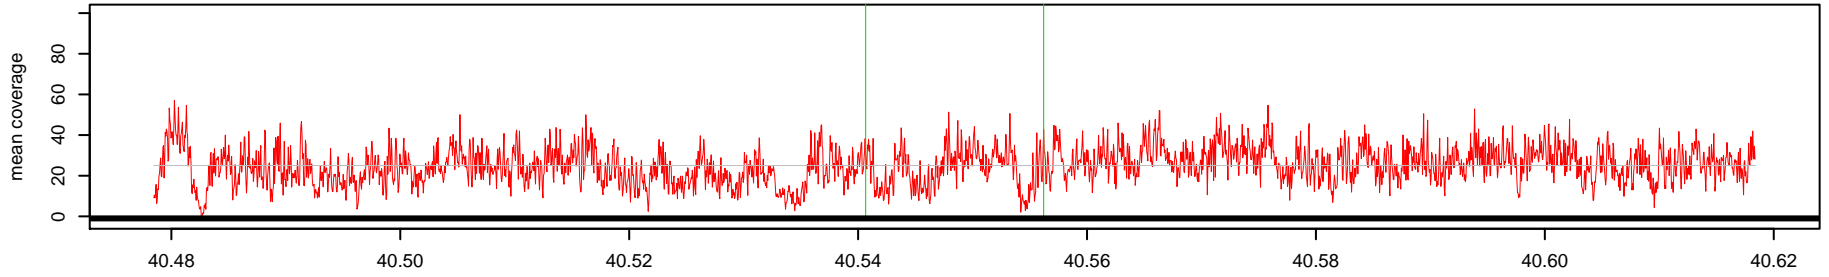

Log2( AK1 read depth / NA10851 read depth)

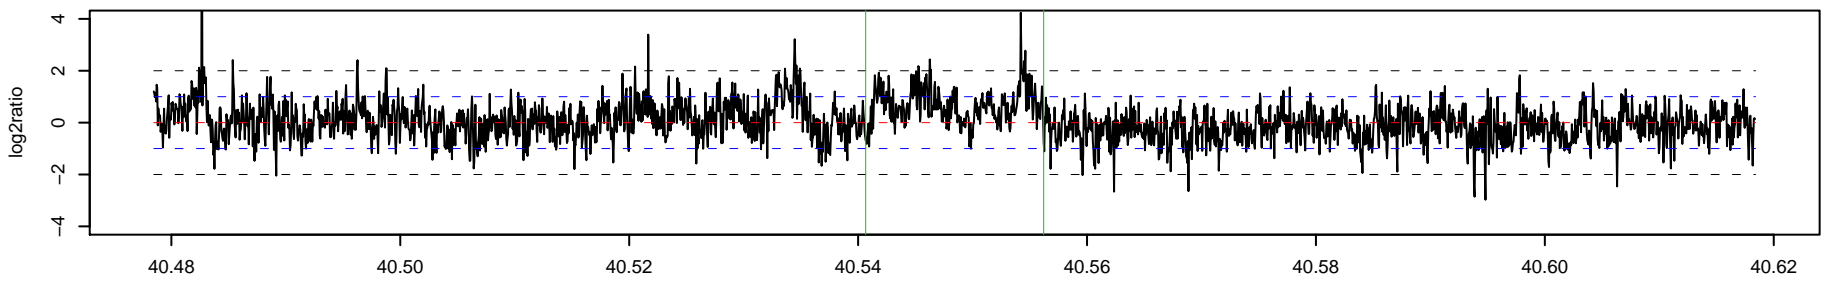

714\_AK1 Chr 20 : 186232 – 188051 , 1820 bp (aCGH relative log2ratio= -0.42 )

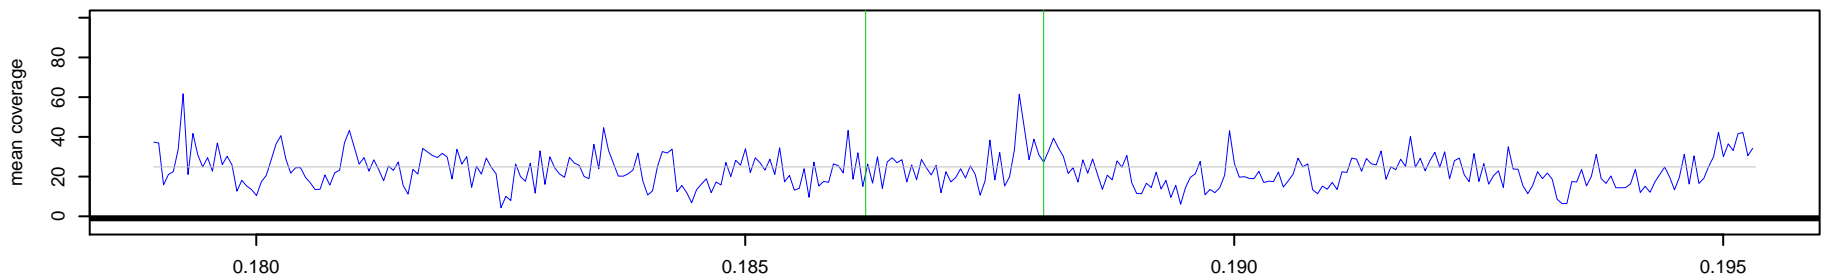

714\_NA10851 Chr 20 : 186232 – 188051 , 1820 bp (aCGH relative log2ratio= -0.42 )

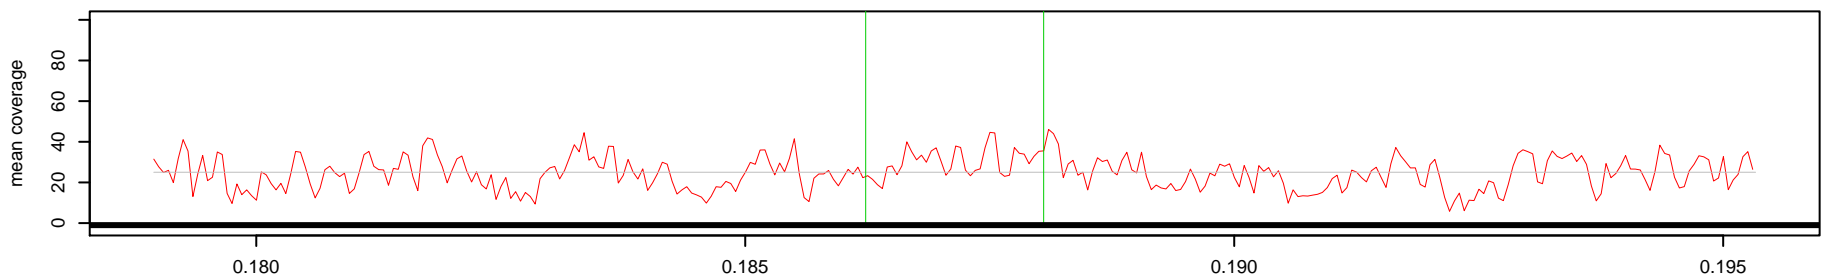

Log2( AK1 read depth / NA10851 read depth)

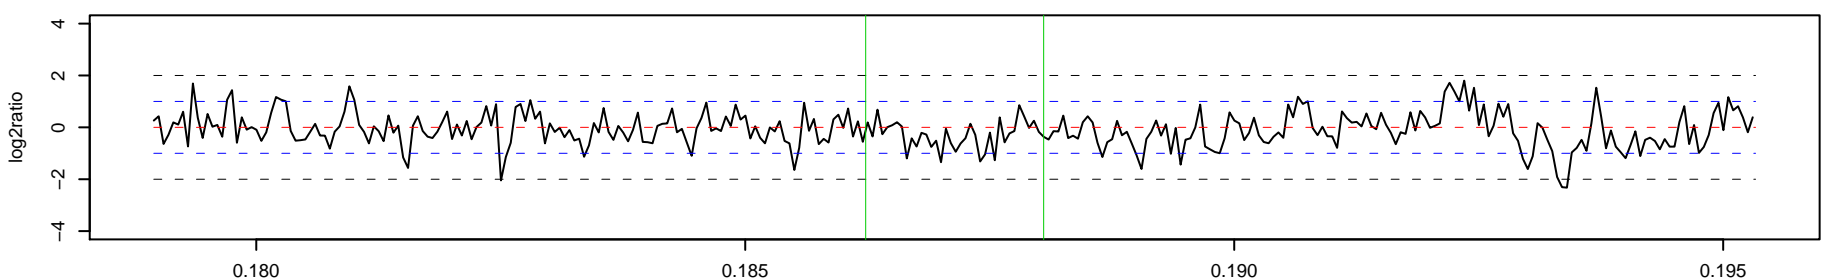

715\_AK1 Chr 20 : 7642053 – 7643164 , 1112 bp (aCGH relative log2ratio= 0.51 )

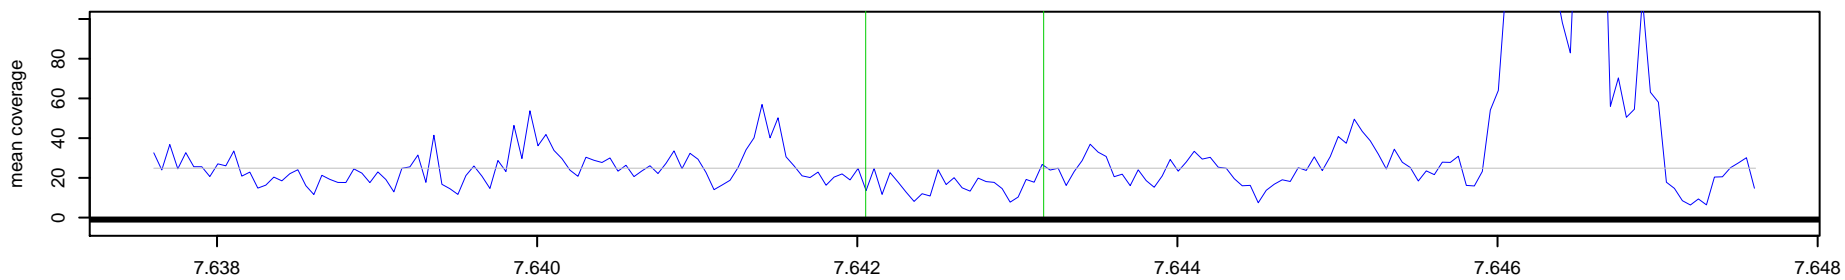

715\_NA10851 Chr 20 : 7642053 – 7643164 , 1112 bp (aCGH relative log2ratio= 0.51 )

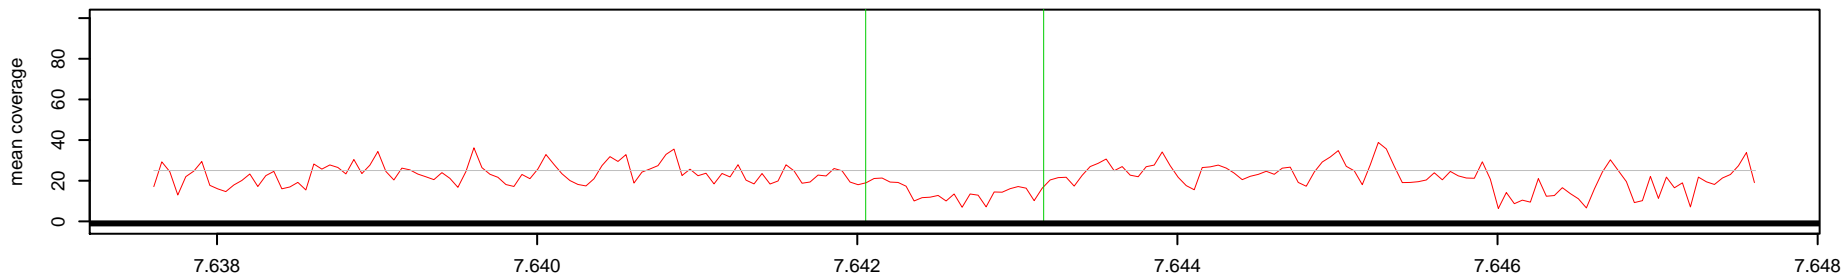

Log2( AK1 read depth / NA10851 read depth)

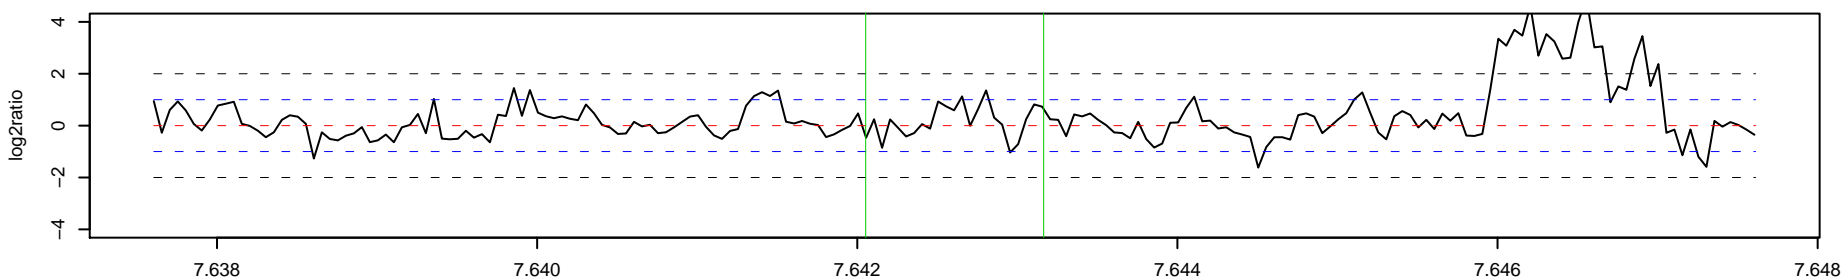

716\_AK1 Chr 20 : 25838178 – 28225718 , 2387541 bp (aCGH relative log2ratio= 0.29 )

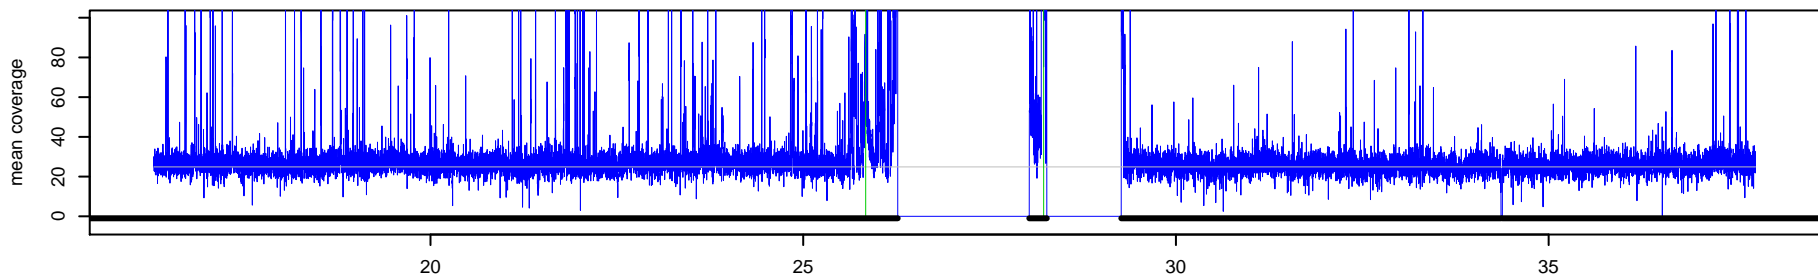

716\_NA10851 Chr 20 : 25838178 – 28225718 , 2387541 bp (aCGH relative log2ratio= 0.29 )

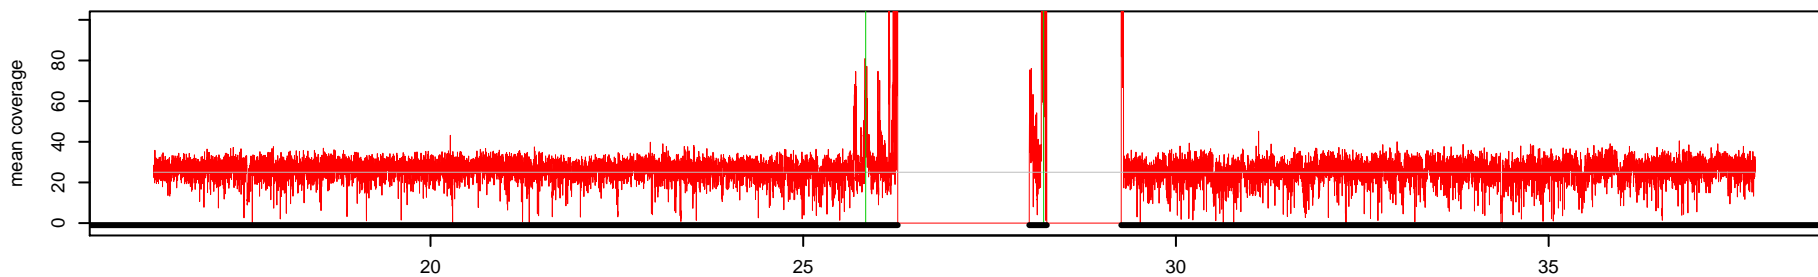

Log2( AK1 read depth / NA10851 read depth)

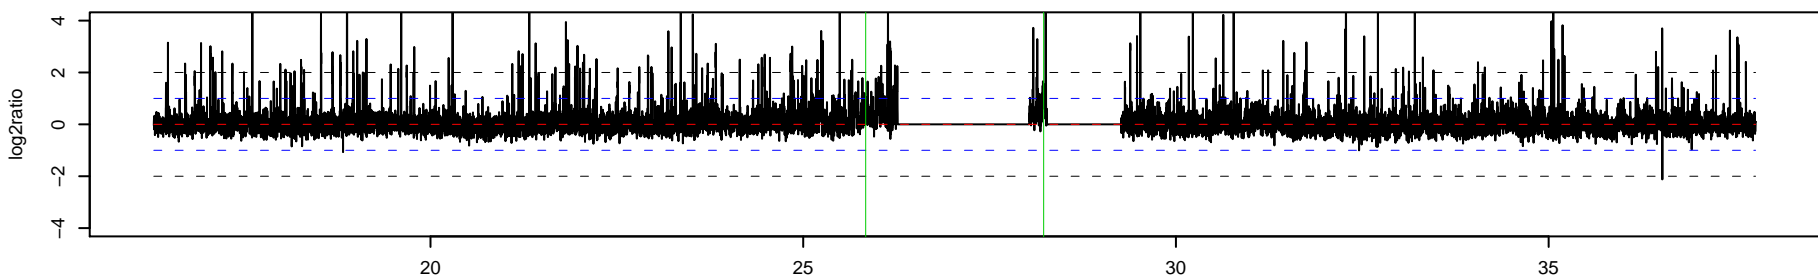

717\_AK1 Chr 20 : 31293892 – 31294497 , 606 bp (aCGH relative log2ratio= 0.41 )

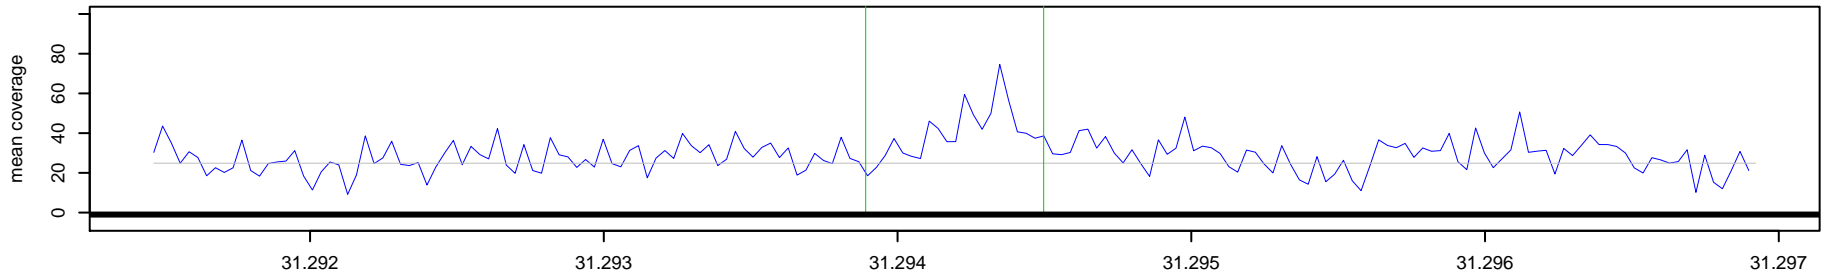

717\_NA10851 Chr 20 : 31293892 – 31294497 , 606 bp (aCGH relative log2ratio= 0.41 )

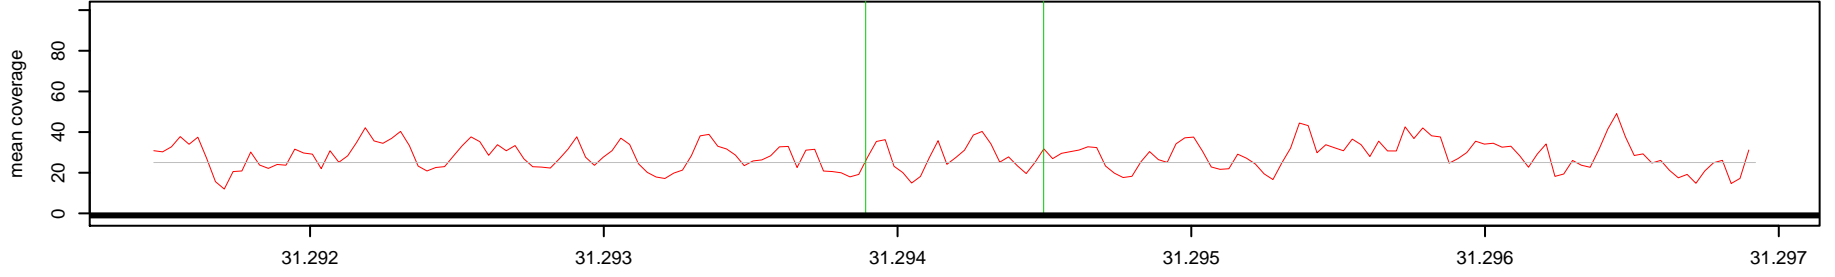

Log2( AK1 read depth / NA10851 read depth)

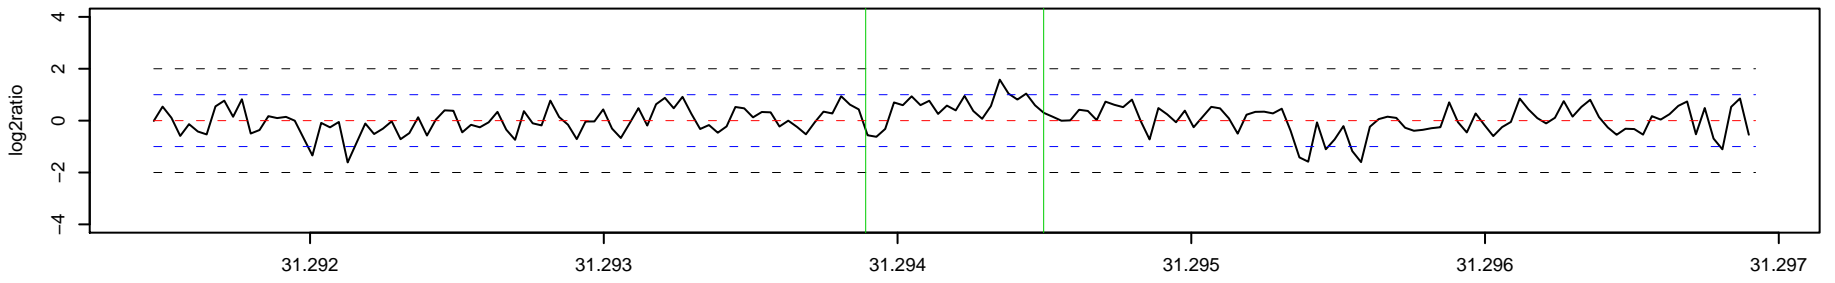

718\_AK1 Chr 20 : 62343238 – 62343731 , 494 bp (aCGH relative log2ratio= 0.26 )

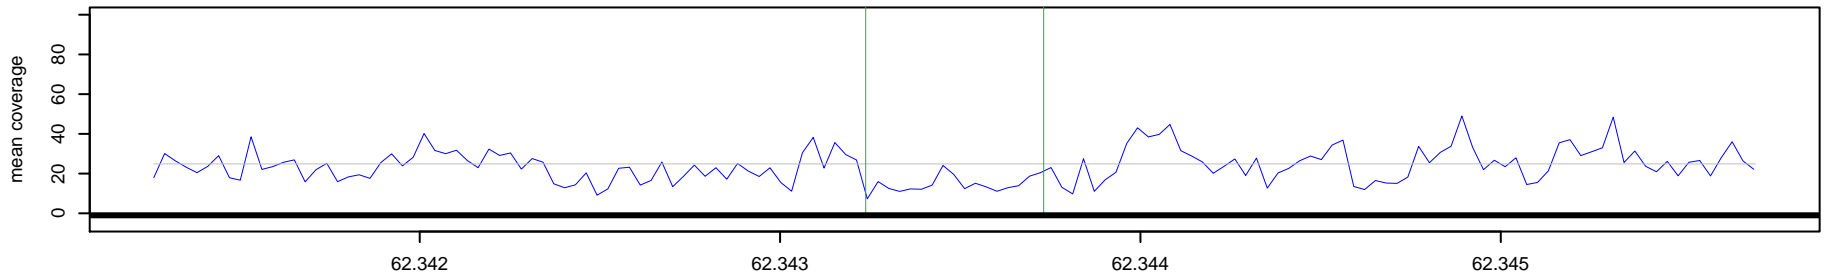

718\_NA10851 Chr 20 : 62343238 – 62343731 , 494 bp (aCGH relative log2ratio= 0.26 )

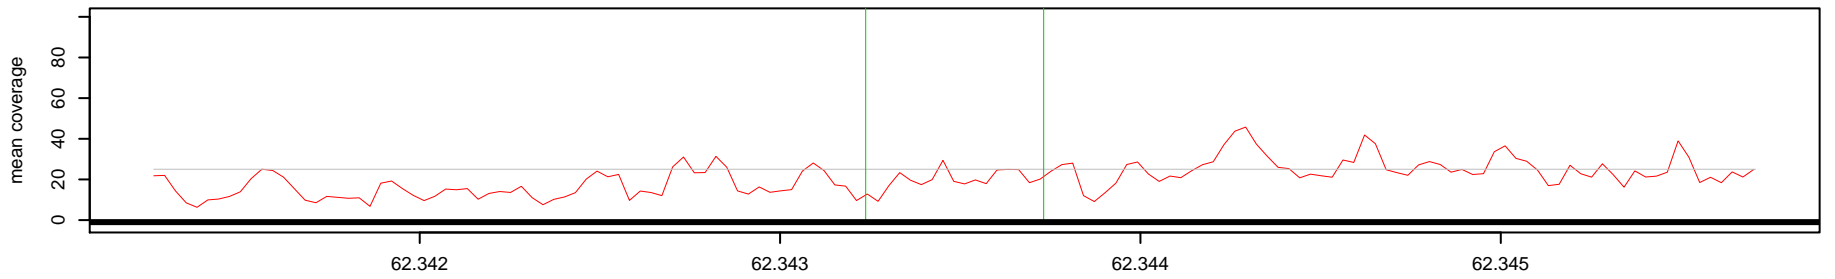

Log2( AK1 read depth / NA10851 read depth)

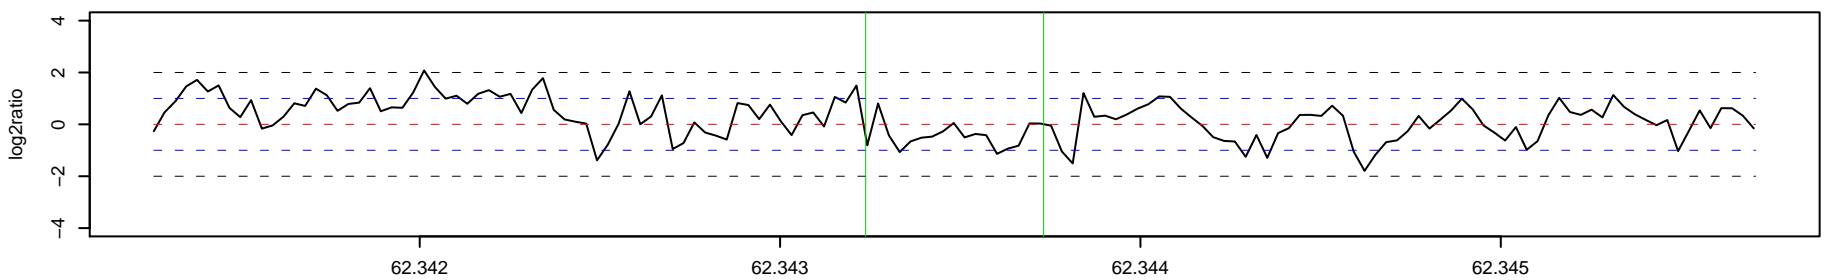

719\_AK1 Chr 21 : 22576881 – 22587742 , 10862 bp (aCGH relative log2ratio= -0.85 )

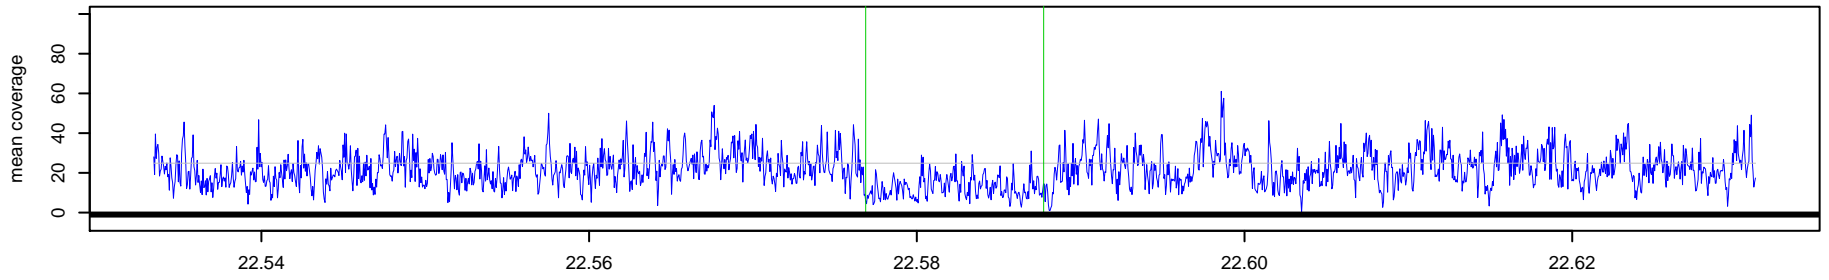

719\_NA10851 Chr 21 : 22576881 – 22587742 , 10862 bp (aCGH relative log2ratio= -0.85 )

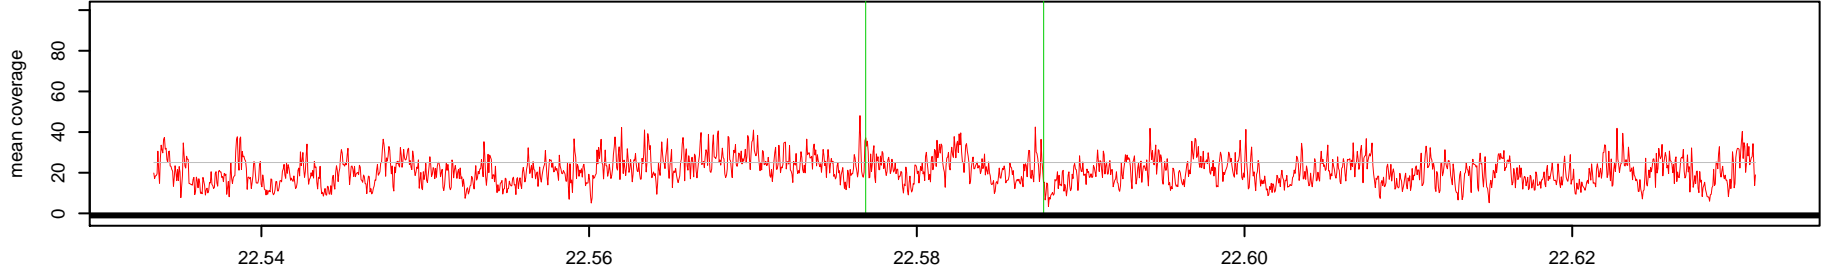

Log2( AK1 read depth / NA10851 read depth)

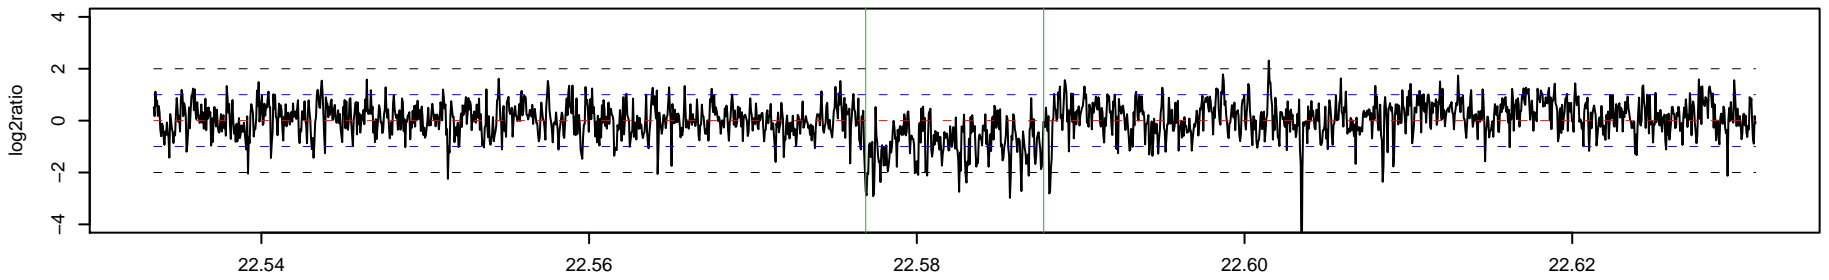

720\_AK1 Chr 21 : 37043784 – 37045479 , 1696 bp (aCGH relative log2ratio= 0.22 )

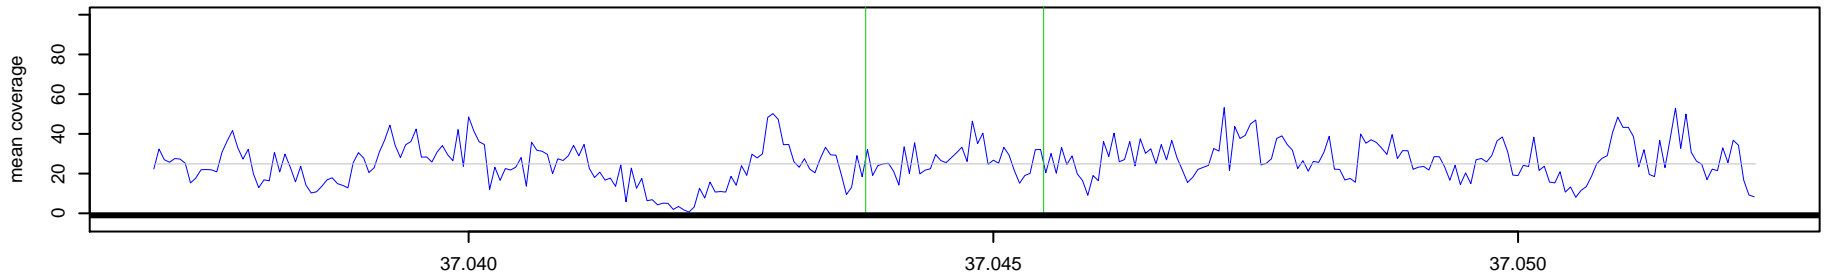

720\_NA10851 Chr 21 : 37043784 – 37045479 , 1696 bp (aCGH relative log2ratio= 0.22 )

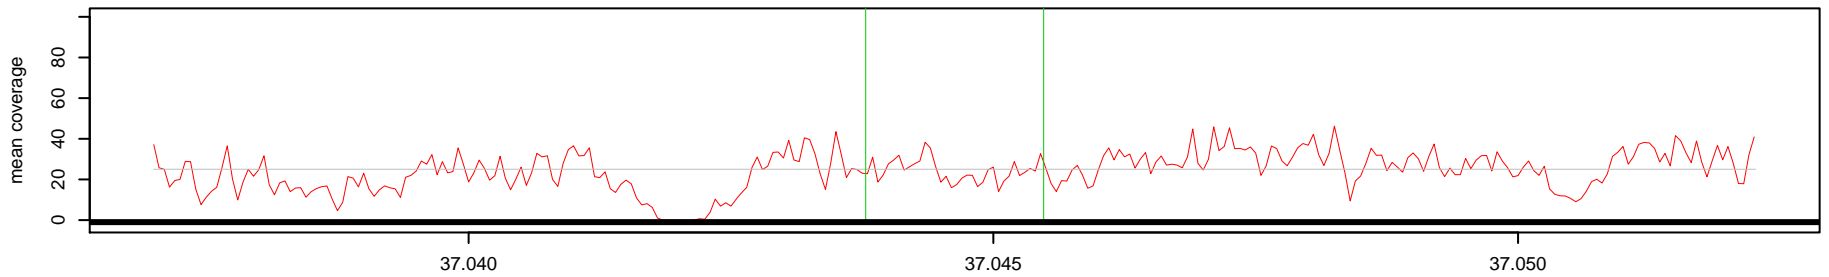

Log2( AK1 read depth / NA10851 read depth)

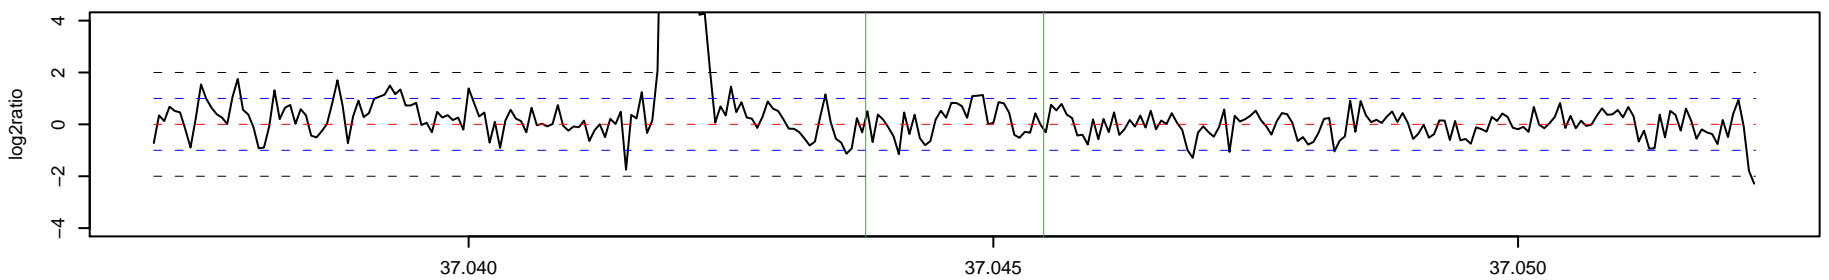

721 \_ AK1 Chr 21 : 40028956 - 40029510 , 555 bp (aCGH relative log2ratio= 0.63 )

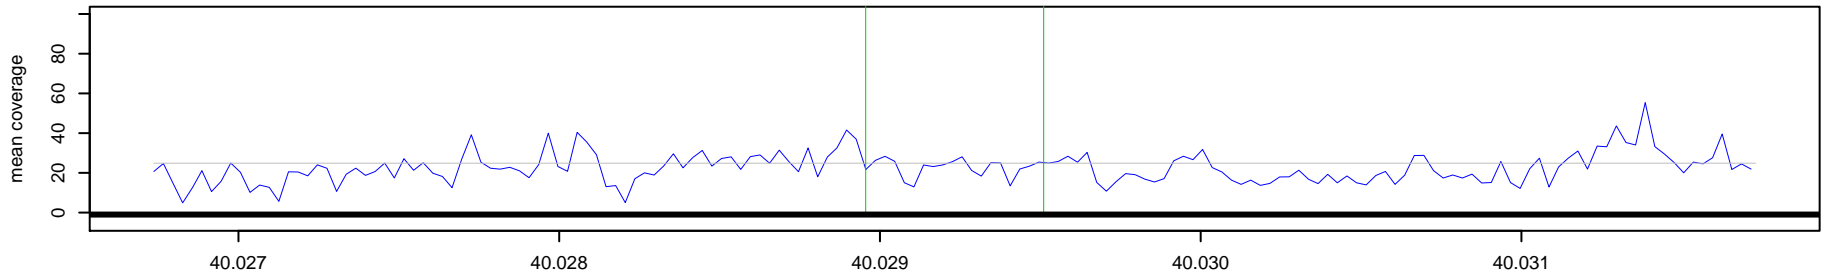

721 \_ NA10851 Chr 21 : 40028956 - 40029510 , 555 bp (aCGH relative log2ratio= 0.63 )

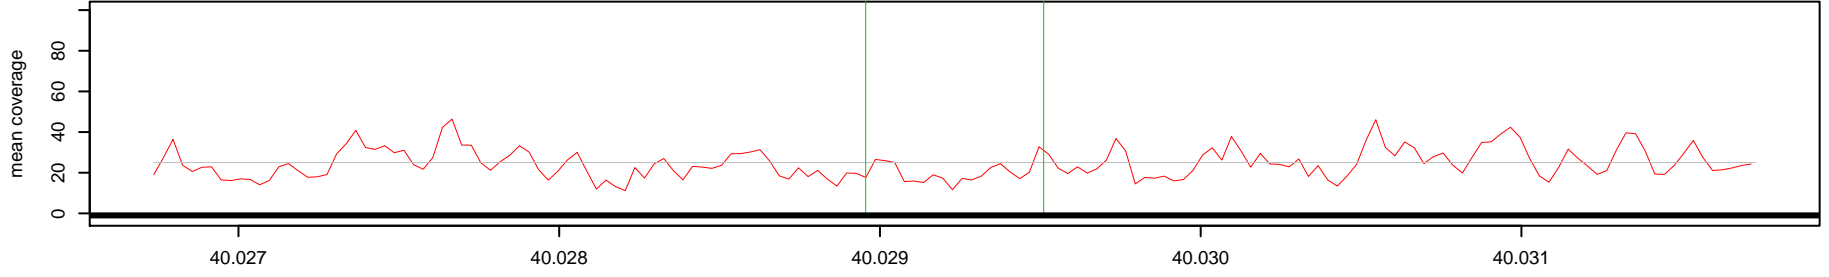

Log2( AK1 read depth / NA10851 read depth)

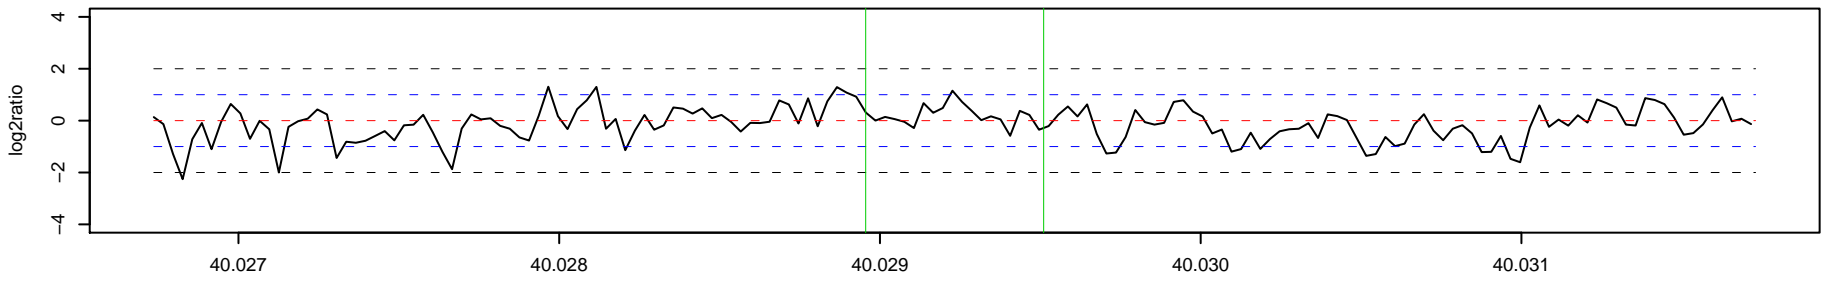

o

o
